# Supplementary material
Source: PubMed Central journal article supplement (PMC6814017)
Supplement: NIHMS1054600-supplement-SI_File.pdf [file NIHMS1054600-supplement-SI_File.pdf]

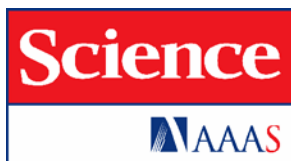

## Supplementary Materials for

### **Heterobiaryl synthesis by contractive C–C coupling via P(V) intermediates**

Michael C. Hilton, Xuan Zhang, Benjamin T. Boyle, Juan V. Alegre-Requena, Robert S. Paton,\*  
Andrew McNally\*

\*Corresponding author. Email: robert.paton@chem.ox.ac.uk (R.S.P.); andy.mcnally@colostate.edu (A.M.)

Published 16 November 2018, *Science* **362**, 799 (2018)  
DOI: 10.1126/science.aas8961

#### **This PDF file includes:**

Materials and Methods

Figs. S1 to S26

Tables S1 to S22

Captions for movies S1 and S2

NMR Spectra

References

#### **Other supplementary material for this manuscript includes:**

Movies S1 and S2

## Table of Contents

|                                                                                     |             |
|-------------------------------------------------------------------------------------|-------------|
| <b>1. General Information</b>                                                       | <b>S3</b>   |
| <b>2. Optimization Studies</b>                                                      | <b>S4</b>   |
| <b>3. Computational Methods</b>                                                     | <b>S6</b>   |
| <b>4. Reaction Mechanism: Computational Analysis</b>                                | <b>S9</b>   |
| a. Nomenclature                                                                     | S9          |
| b. Configurational Energetics: Controlled by Apicophilicity                         | S11         |
| c. Why Pyridine-Pyridine Coupling is Favored                                        | S12         |
| d. Computed Reaction Mechanism from Int-III                                         | S14         |
| e. Computed Reaction Mechanism from [Int-III·H] <sup>+</sup>                        | S17         |
| f. Computed Reaction Mechanism from [Int-III·2H] <sup>2+</sup>                      | S19         |
| g. Solvation Model Validation of SMD Using COSMO-RS                                 | S22         |
| h. NBO Analysis                                                                     | S25         |
| <b>5. Potential Energy Surface (PES) Relaxed Scans</b>                              | <b>S27</b>  |
| <b>6. Captions to Movies S1-2</b>                                                   | <b>S28</b>  |
| <b>7. <sup>1</sup>H NMR and <sup>31</sup>P NMR Salt Protonation Study</b>           | <b>S29</b>  |
| <b>8. Aryl Group Substitution Study: Reaction Kinetics</b>                          | <b>S31</b>  |
| <b>9. Alkoxide Investigation</b>                                                    | <b>S38</b>  |
| <b>10. Challenges and Limitations</b>                                               | <b>S39</b>  |
| <b>11. Additional Examples</b>                                                      | <b>S40</b>  |
| <b>12. Experimental Procedures</b>                                                  | <b>S41</b>  |
| a. Preparation of Heteroaryl Precursors                                             | S41         |
| b. Preparation of Heteroaryl Phosphines                                             | S46         |
| c. Preparation of Heteroaryl Phosphonium Salts                                      | S52         |
| d. Ligand-coupling Reactions to Make Heterobiaryls                                  | S79         |
| <b>13. Thermochemical Data and Absolute Energy Values</b>                           | <b>S98</b>  |
| <b>14. Cartesian Coordinates</b>                                                    | <b>S107</b> |
| <b>15. <sup>1</sup>H, <sup>13</sup>C, <sup>19</sup>F and <sup>31</sup>P Spectra</b> | <b>S193</b> |
| <b>References</b>                                                                   |             |

## 1. General Information

Proton nuclear magnetic resonance ( $^1\text{H}$  NMR) spectra were recorded at ambient temperature on a Varian 400 MR spectrometer (400 MHz), an Agilent Inova 400 (400 MHz) spectrometer, an Agilent Inova 500 (500 MHz) spectrometer, or a Bruker AV-111 400 (400 MHz) spectrometer. Chemical shifts ( $\delta$ ) are reported in ppm and quoted to the nearest 0.01 ppm relative to the residual protons in  $\text{CDCl}_3$  (7.26 ppm),  $\text{CD}_3\text{OD}$  (3.31 ppm) or  $(\text{CD}_3)_2\text{SO}$  (2.05 ppm) and coupling constants ( $J$ ) are quoted in Hertz (Hz). Data are reported as follows: Chemical shift (number of protons, multiplicity, coupling constants). Coupling constants were quoted to the nearest 0.1 Hz and multiplicity reported according to the following convention: s = singlet, d = doublet, t = triplet, q = quartet, qn = quintet, sext = sextet, sp = septet, m = multiplet, br = broad. Where coincident coupling constants have been observed, the apparent (app) multiplicity of the proton resonance has been reported. Carbon nuclear magnetic resonance ( $^{13}\text{C}$  NMR) spectra were recorded at ambient temperature on a Varian 400 MR spectrometer (100 MHz), an Agilent Inova 400 (100 MHz) spectrometer, an Agilent Inova 500 spectrometer (125 MHz) or a Bruker AV-111 400 (100 MHz) spectrometer. Chemical shift ( $\delta$ ) was measured in ppm and quoted to the nearest 0.01 ppm relative to the residual solvent peaks in  $\text{CDCl}_3$  (77.00 ppm),  $(\text{CD}_3)_2\text{SO}$  (39.51 ppm),  $\text{CD}_3\text{OD}$  (49.00 ppm) or  $\text{CD}_3\text{CN}$  (1.32 ppm).

Low-resolution mass spectra (LRMS) were measured on an Agilent 6310 Quadrupole Mass Spectrometer. High-resolution mass spectra (HRMS) were measured on an Agilent 6220 TOF LC/MS ("OTOF") interfaced to an Agilent 1200 HPLC with multi-mode (combined ESI and APCI) and Direct Analysis in Real Time (DART) sources. (IR) spectra were recorded on a Bruker Tensor 27 FT-IR spectrometer as either solids or neat films, either through direct application or deposited in  $\text{CHCl}_3$ , with absorptions reported in wavenumbers ( $\text{cm}^{-1}$ ).

Analytical thin layer chromatography (TLC) was performed using pre-coated Silicycle glass backed silica gel plates (Silicagel 60 F254). Flash column chromatography was undertaken on Silicycle silica gel Siliaflash P60 40-63  $\mu\text{m}$  (230-400 mesh) under a positive pressure of air unless otherwise stated. Visualization was achieved using ultraviolet light (254 nm) and chemical staining with ceric ammonium molybdate or basic potassium permanganate solutions as appropriate.

Tetrahydrofuran (THF), toluene, hexane, diethyl ether and dichloromethane were dried and distilled using standard methods (44). 1,2-Dichloroethane (DCE), 1,4-dioxane, chloroform, chlorobenzene and acetone were purchased anhydrous from Sigma Aldrich chemical company. All reagents were purchased at the highest commercial quality and used without further purification. Reactions were carried out under an atmosphere of nitrogen unless otherwise stated. All reactions were monitored by TLC,  $^1\text{H}$  NMR spectra taken from reaction samples, and liquid chromatography mass spectrometry (LCMS) using an Agilent 6310 Quadrupole Mass Spectrometer for MS analysis. Melting points (mp) were recorded using a Büchi B-450 melting point apparatus and are reported uncorrected.

$\text{Tf}_2\text{O}$  (99%) was purchased from Oakwood Chemical and used without further purification but was routinely stored in a  $-20$  °C fridge. DBU was distilled before use. (2,2,2)-Trifluoroethanol (TFE) was purchased from Oakwood Chemicals and used without further purification. 200 proof ethanol was purchased from PHARMCO-AAPER and used without further purification. HCl (4.0 M in dioxanes) and trifluoromethanesulfonic acid (98%) were purchased from Sigma Aldrich chemical company and used without further purification but were routinely stored in a  $-20$  °C fridge.

## 2. Optimization Studies

**Table S1:** Optimization of Ligand Coupling Reaction

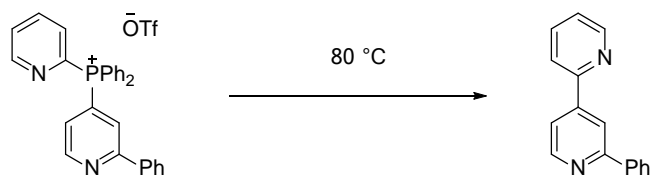

| Entry           | Solvent           | Concentration | Equiv. HCl | Additive                   | % Yield* |
|-----------------|-------------------|---------------|------------|----------------------------|----------|
| 1 <sup>†</sup>  | MeOH              | 0.125         | -          | -                          | 0        |
| 2               | MeOH              | 0.2           | 2          | -                          | 76       |
| 3               | IPA               | 0.2           | 2          | -                          | 57       |
| 4               | <i>t</i> -BuOH    | 0.2           | 2          | -                          | 51       |
| 5               | TFE               | 0.2           | 2          | -                          | 59       |
| 6               | HFIPA             | 0.2           | 2          | -                          | 68       |
| 7               | Acetone           | 0.1           | -          | H <sub>2</sub> O(10 equiv) | 44       |
| 8               | EtOAc             | 0.1           | -          | H <sub>2</sub> O(10 equiv) | 55       |
| 9               | MeOH              | 0.2           | 0.5        | -                          | 48       |
| 10              | MeOH              | 0.2           | 1          | -                          | 62       |
| 11              | EtOH              | 0.2           | 2          | -                          | 70       |
| 12              | EtOH              | 0.4           | 2          | -                          | 80       |
| 13 <sup>†</sup> | EtOH              | 0.4           | 2          | -                          | 78       |
| 14 <sup>†</sup> | EtOH              | 1.0           | 2          | -                          | 80       |
| 15              | TFE               | 0.4           | -          | -                          | 0        |
| 16              | HFIPA             | 0.4           | -          | -                          | 0        |
| 17              | NEt <sub>3</sub>  | 0.2           | -          | -                          | 0        |
| 18              | Pyridine          | 0.4           | -          | -                          | 0        |
| 19              | CHCl <sub>3</sub> | 0.2           | 2          | <i>n</i> -propylthiol      | 14       |

|    |                   |     |   |                                                   |                 |
|----|-------------------|-----|---|---------------------------------------------------|-----------------|
| 20 | CHCl <sub>3</sub> | 0.2 | - | (10 equiv)<br><i>n</i> -propylthiol<br>(10 equiv) | 0               |
| 21 | CHCl <sub>3</sub> | 0.2 | 2 | phenol (10<br>equiv)                              | 13              |
| 22 | CHCl <sub>3</sub> | 0.2 | - | phenol (10<br>equiv)                              | 0               |
| 23 | CHCl <sub>3</sub> | 0.4 | 2 | -                                                 | ND <sup>‡</sup> |
| 24 | THF               | 0.4 | 2 | -                                                 | ND <sup>‡</sup> |
| 25 | EtOAc             | 0.4 | 2 | -                                                 | ND <sup>‡</sup> |
| 26 | EtOH              | 0.4 | - | -                                                 | 0               |

\* <sup>1</sup>H NMR yields shown using 1,3,5-trimethoxybenzene as an internal standard.

† Reactions were carried out on a 0.25 mmol scale instead of 0.1 mmol

‡ Products were not detected by LCMS

**Table S2:** Temperature Optimization of Ligand Coupling Reaction: 2,4' Coupling System

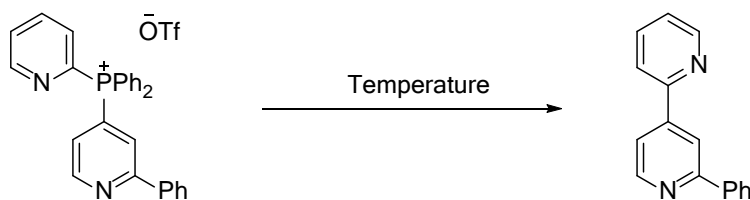

| Entry | Solvent | Concentration | Equiv. HCl | Temperature | % Yield* |
|-------|---------|---------------|------------|-------------|----------|
| 1     | MeOH    | 0.2           | 2          | 40          | 12       |
| 2     | MeOH    | 0.2           | 2          | 60          | 44       |
| 3     | MeOH    | 0.2           | 2          | 70          | 60       |
| 4     | MeOH    | 0.2           | 2          | 80          | 72       |
| 5     | MeOH    | 0.4           | 2          | 80          | 83       |
| 6     | EtOH    | 0.4           | 2          | 70          | 66       |
| 7     | EtOH    | 0.4           | 2          | 80          | 78       |
| 8     | EtOH    | 0.4           | 2          | 90          | 76       |

\* <sup>1</sup>H NMR yields shown using 1,3,5-trimethoxybenzene as an internal standard.

**Table S3:** Temperature Optimization of Ligand Coupling Reaction: 4,4' Coupling System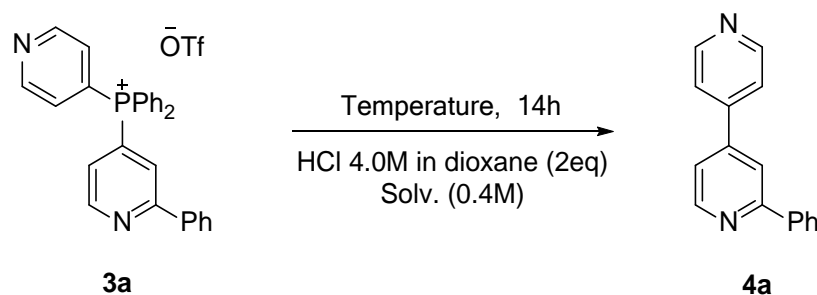

| Entry | Solvent           | Temperature | % Yield* |
|-------|-------------------|-------------|----------|
| 1     | MeOH              | 40          | 12       |
| 2     | MeOH              | 60          | 75       |
| 3     | EtOH              | 80          | 89 (88)  |
| 4     | EtOH <sup>†</sup> | 80          | 93       |

\* <sup>1</sup>H NMR yields shown using triphenylmethane as an internal standard.

<sup>†</sup>Reaction ran for 18 hours with 2eq TfOH instead of 2eq HCl 4.0M in dioxane for 14 hours. Isolated yield shown in parentheses.

### 3. Computational Methods

The range-separated dispersion-corrected  $\omega$ B97X-D density functional (45, 46) was used with the 6-31+G(d) (47-51) basis set to optimize the geometries of all stationary points. This functional captures weak, non-covalent interactions, such as the attractive London dispersion component of van der Waals interactions, which influences structures and energetics (45, 52). We evaluated the ability of our chosen level of theory in describing the structures of pentacoordinate P(V) species by comparison against alkoxyphosphoranes which have been characterized by X-ray crystallography (**Figure S1**). Considering that we used solvent (SMD = ethanol) in the calculations, which is of different polarity to the bulk crystal, and allowing for the possibility of crystal packing effects in the X-ray structures, the level of agreement between theory and experiment is high: P-C bond distances differ by less than 0.5%, P-O distances by less than 5%, and all angles and dihedrals are also well reproduced. It is worth mentioning that P-O bonds are highly polarized as observed in our NBO calculations (*vide infra*) and, therefore, the solvation of these molecules in the two environments (crystal packing and EtOH) probably has a relevant impact on the lengths of these bonds.

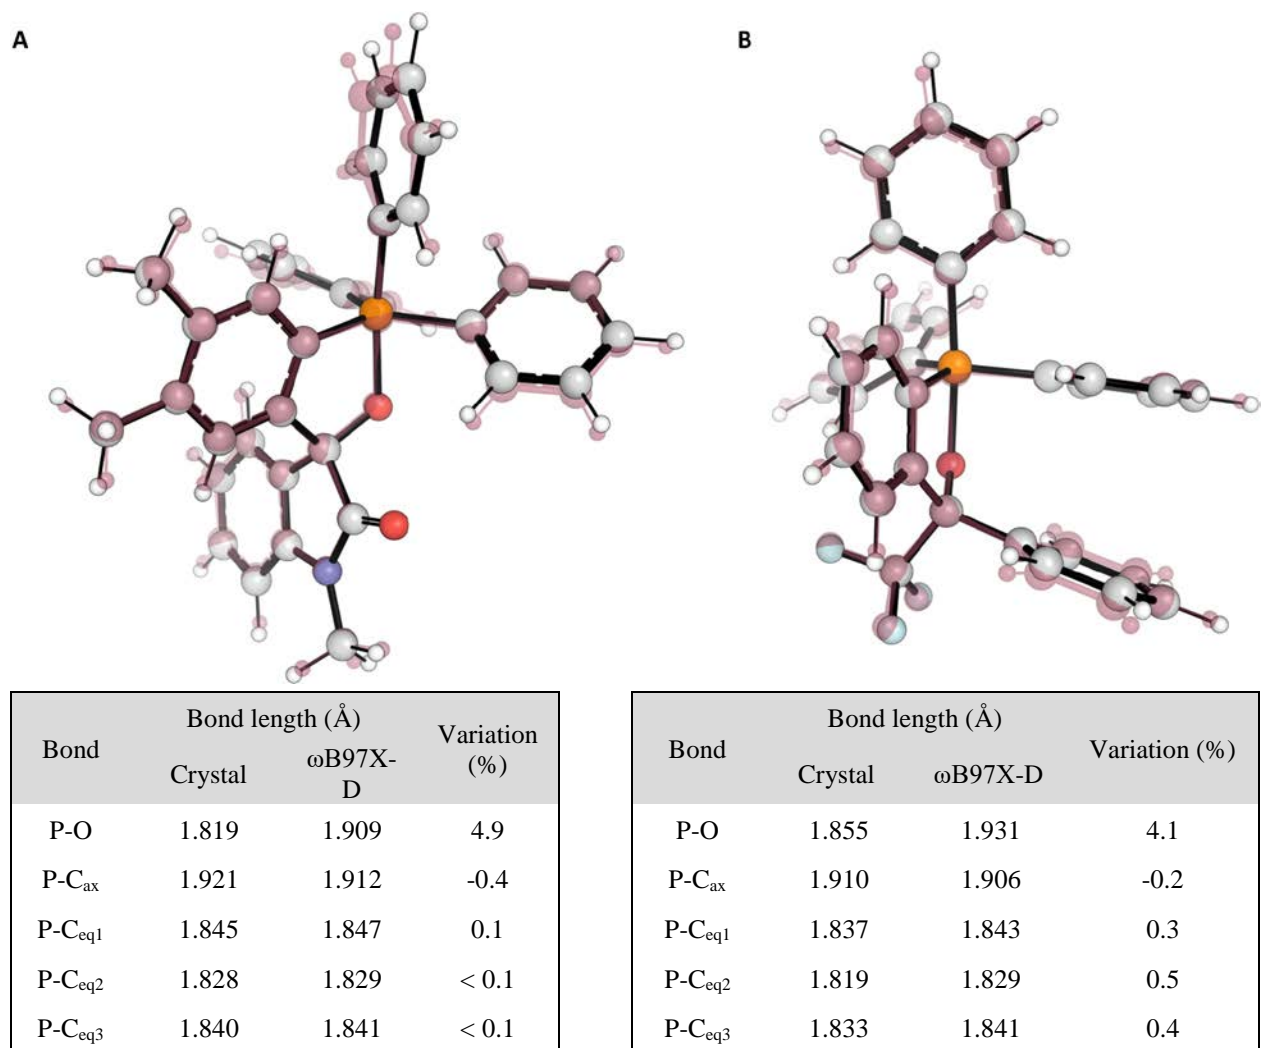

**Figure S1.** Top: Overlay of X-ray structures of 1',5,6-trimethyl-1,1,1-triphenyl-1H-spiro[2,1-benzoxaphosphole-3,3'-indol]-2'(1'H)-one (CCDC identifier: COSZOB) (53) (A) and 1,1,1,3-tetraphenyl-3-(trifluoromethyl)-1,3-dihydro-2,1-benzoxaphosphole (CCDC identifier: COTGUP) (53) (B), represented in dark red, with  $\omega$ B97X-D/6-31+G(d)(SMD) optimized geometries, represented with standard colors. Bottom: Tabulation of P-C/P-O bond lengths determined experimentally and computationally.

In steps **Int-III**, [**Int-III·H**]<sup>+</sup> and [**Int-III·2H**]<sup>2+</sup>, a manual conformational search was performed. In this process, P substituents were placed in different axial and equatorial positions, and the different aromatic groups along with the methoxy group were rotated systematically and incrementally. During the conformational search, we found 7, 11 and 9 different structures for **Int-III**, [**Int-III·H**]<sup>+</sup> and [**Int-III·2H**]<sup>2+</sup>, respectively, from all the conformations studied (see section *Absolute Energy Values* for more information). For each isomer we obtained the subsequent reaction coordinate (**TS-I**, **Int-IV**, etc).

Vibrational frequency calculations were carried out to confirm that stationary points were either minima or first-order saddle points on the potential energy surface, and to obtain thermal corrections to Gibbs free energies at 353.15 K (80 °C). Additionally, intrinsic reaction coordinate (IRC) calculations (54) were performed to verify that the intermediates (**Int**) of the different

pathways connected to their corresponding transition structure (**TS**). Quasi-harmonic (QHA) corrections were applied to the computed vibrational entropies using a frequency cut-off value of 100.0 cm<sup>-1</sup>, adopting the model proposed by Grimme (55). This was automated by the *GoodVibes* program (56).

Solvent effects were considered in all calculations (i.e. optimizations and single-point energy calculations) using the integral equation formalism variant of the polarizable continuum model (IEF-PCM) (57-62) with the SMD solvation model (solvent=ethanol) (62). Density functional theory (DFT) calculations were carried out in *Gaussian 16* (63), with an “ultrafine” pruned (99,590) grid for numerical integration of the exchange-correlation functional and its derivatives. Atomic charges and Wiberg bond orders (64) were computed using natural population analysis (NPA) with *NBO 6.0* (65), interfaced to Gaussian 16. Molecular graphics were generated using *PyMol* (66); Our display settings have been made openly accessible (67). Energy scatter plots were created using *GraphPad Prism* (68). Electron localization function (ELF) analysis (69) of **[TS-I·2H]<sup>2+</sup>-PyH<sup>+</sup>,OMe,ax-a** (see the *Animation of Reaction Coordinate: Movie S1*) was carried out using *Multiwfn* (70) for points along the intrinsic reaction coordinate.

Electronic energies were refined by single point energy calculations on the optimized geometries. We used both DFT and correlated wavefunction theory:  $\omega$ B97X-D/def2-QZVPP (71, 72) and DLPNO-CCSD(T) (73-77) /cc-pV(DT)Z (78-82) calculations, both with the inclusion of SMD solvation. Quasi-harmonic thermal corrections obtained at  $\omega$ B97X-D/6-31+G(d) level of theory were applied to these single point energies.

Domain-based local pair-natural orbital coupled cluster with perturbative triple excitations (DLPNO-CCSD(T)) calculations were performed with *ORCA 4.0*. (81, 82) Using a normal truncation threshold (“normalPNO”) DLPNO-CCSD(T) energies achieve an accuracy of 1 kcal mol<sup>-1</sup> or better compared to CCSD(T) (83), which is widely regarded as a “gold standard” in computational chemistry (84). Extrapolation to the basis set limit was performed using cc-pVDZ and cc-pVTZ energies, treating the convergence of SCF and correlation energies separately:

(a) The convergence of the HF energy to the basis set limit is calculated as:

$$E_{SCF}^{(X)} = E_{SCF}^{(\infty)} + Ae^{(-\alpha\sqrt{X})} \quad (1)$$

where  $E_{SCF}^X$  is the SCF energy calculated with the basis set having highest angular momentum X,  $E_{SCF}^{\infty}$  is the basis set limit SCF energy,  $\alpha = 4.42$  (empirically optimized for cc-pV(DT)Z), and A is a parameter to be determined.

(b) The correlation energy is assumed to converge as:

$$E_{corr}^{(\infty)} = \frac{X^\beta E_{corr}^{(X)} - Y^\beta E_{corr}^{(Y)}}{X^\beta - Y^\beta} \quad (2)$$

where  $E_{corr}^{(\infty)}$  is the correlation energy calculated with the basis sets having successive highest angular momentums X and Y (in our case 3 and 2), and  $\beta = 2.46$  (empirically optimized for cc-pV(DT)Z) (85).



## 4. Reaction Mechanism: Computational Analysis

### 4a. Nomenclature

We carried out configurational/conformational analysis for all minima and saddle points, systematically generating trigonal bipyramidal structures with substituents in different axial and equatorial positions (**Figure S2**). To enumerate these different structures, we refer to the two substituents in axial positions. For example, pentacoordinate P(V) species with one PyH<sup>+</sup> and one OMe group in axial positions, are referred to (**PyH<sup>+</sup>,OMe,ax**). For each configuration we also obtained multiple conformations with respect to rotation about the methoxy group, catalogued by different letters at the end of each name (*i.e.* a, b, c, etc). Discussion in the main text and energy profiles in the supporting information refer to the most stable rotameric conformation found for each P(V) configuration.

Trigonal bipyramidal P(V)

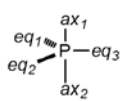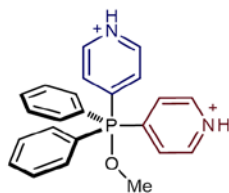

Example:

ax<sub>1</sub> = PyH<sup>+</sup>

ax<sub>2</sub> = OMe

Name = PyH<sup>+</sup>,OMe,ax

\*For different conformations:

PyH<sup>+</sup>,OMe,ax-a

PyH<sup>+</sup>,OMe,ax-b

PyH<sup>+</sup>,OMe,ax-c

...

**Figure S2.** Descriptors used in the enumeration of compounds based on the configuration at phosphorus and the rotameric conformation of the methoxy group.

Furthermore, structures were differentiated based on protonation state (**Figure S3**).

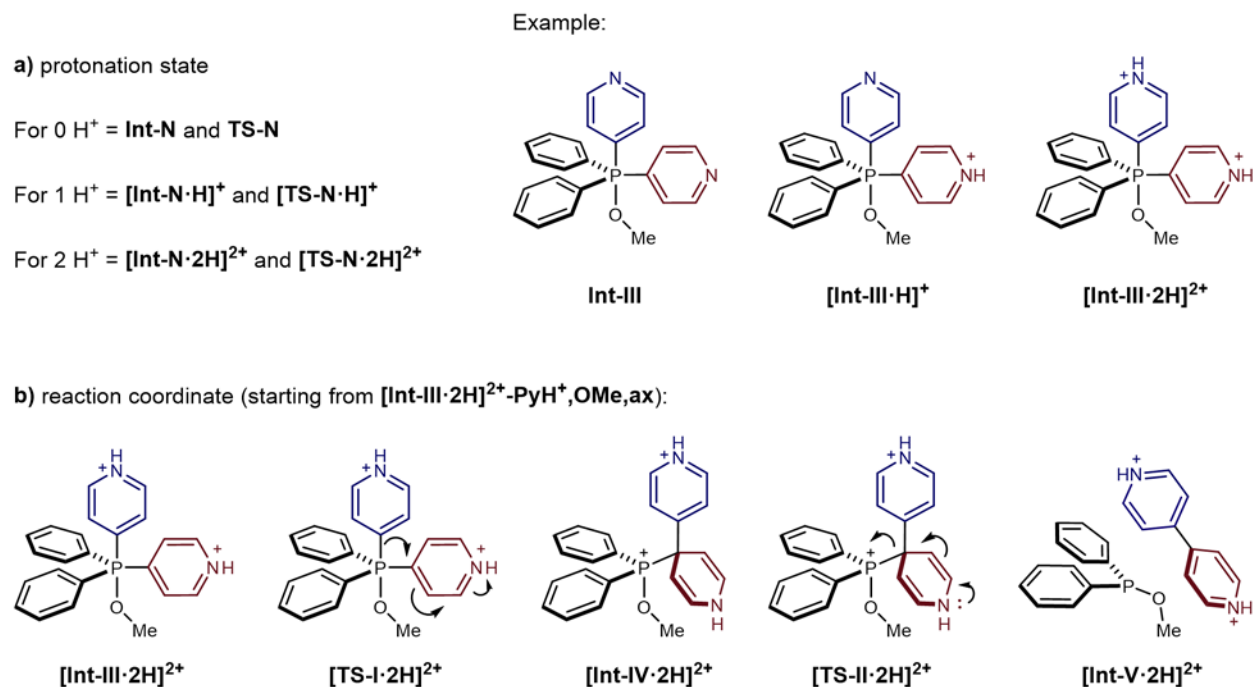

**Figure S3.** Nomenclature based on the number of H<sup>+</sup> equivalents added and reaction step.

Additionally, the phosphine and biaryl products formed in the ligand coupling step are referred to using the following scheme (**Figure S4**).

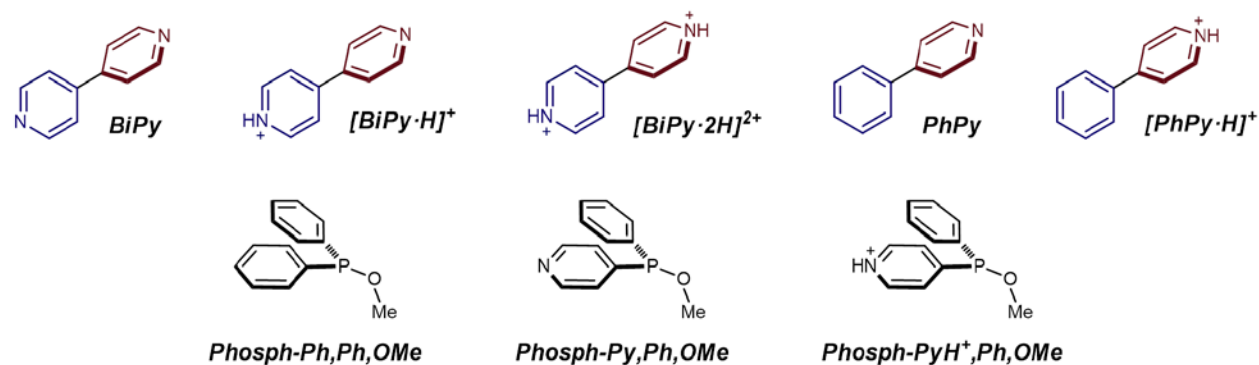

**Figure S4.** List of final phosphines and products.

#### 4b. Configurational Energetics are Controlled by *Apicophilicity*

More electronegative substituents prefer to occupy axial (apical) positions in trigonal bipyramidal species in the absence of steric constraints (86). This preference known as apicophilicity dictates the relative stabilities of the stereoisomers for each of the pentacoordinate P(V) species. As shown in **Figure S5**, the axial preference follows the expected order in line with electron-withdrawing ability  $\text{OMe} > \text{PyH}^+ > \text{Py} > \text{Ph}$ . The relative stabilities are consistent across DFT and WFT calculations.

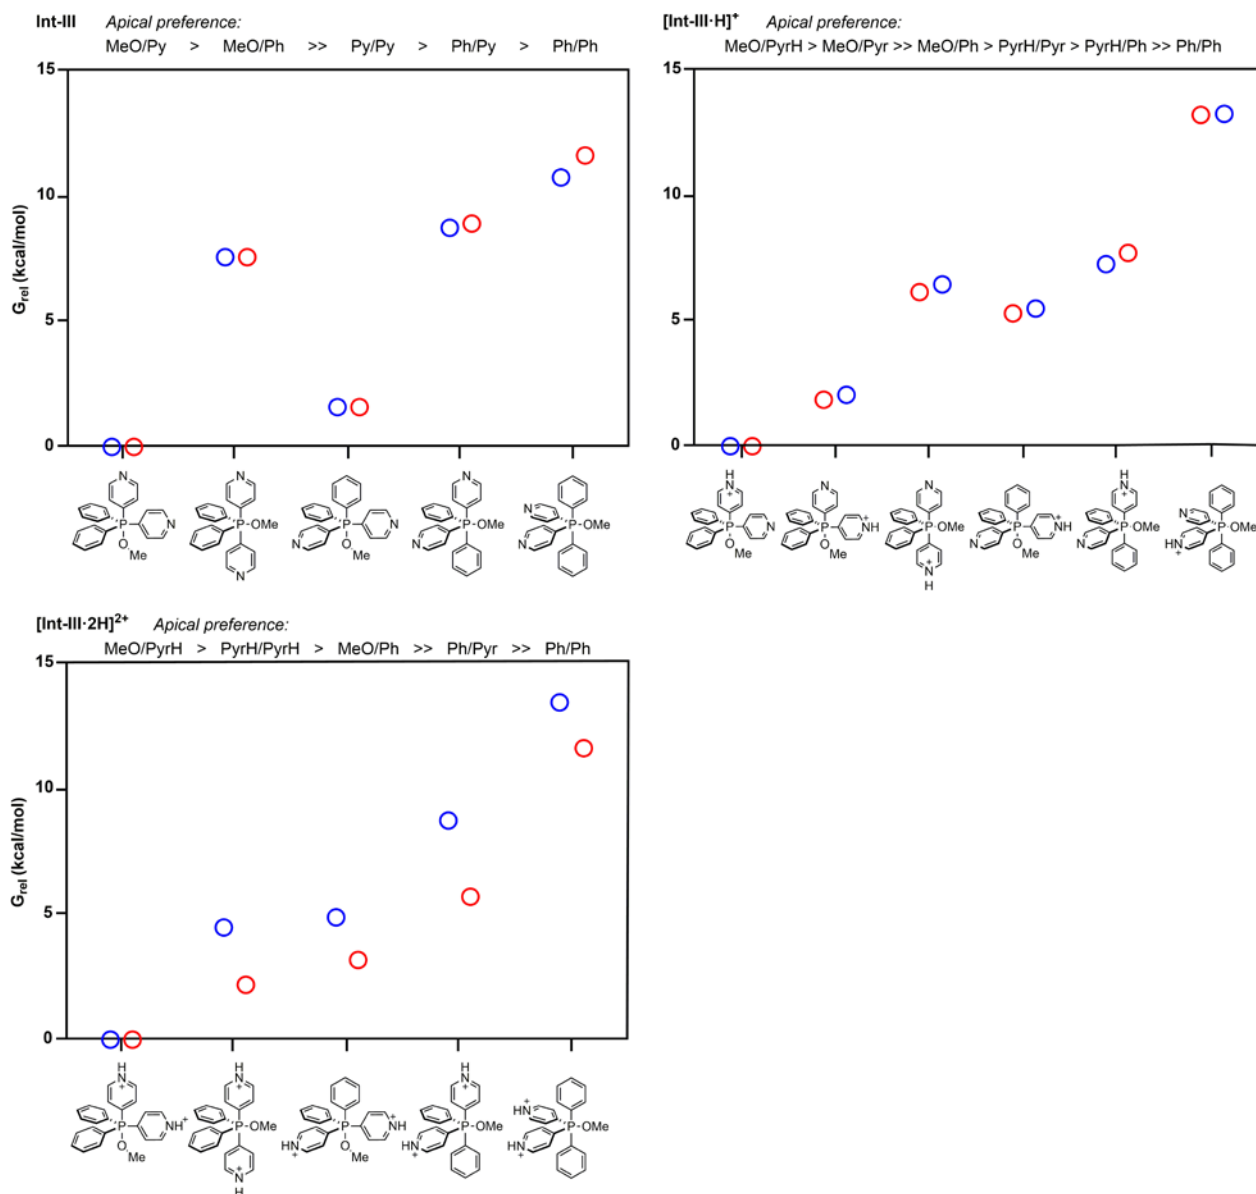

**Figure S5.** Relative stability of the different isomers of **Int-III**, **[Int-III·H]<sup>+</sup>** and **[Int-III·2H]<sup>2+</sup>**. Blue =  $\omega\text{B97X-D/def2-QZVPP}$ ; red =  $\text{DLPNO-CCSD(T)/cc-pV(DT)Z}$ .

#### 4c. Why Pyridine-Pyridine Coupling is Favored

The simplest example of ligand coupling from pentavalent phosphorus is that of  $\text{PH}_5$ . Orbital symmetry dictates that the coupling of equatorial and apical substituents is forbidden: the hydrogenic 1s orbitals of these substituents are of different phase in the highest occupied molecular orbital (HOMO) in  $\text{PH}_5$  (**Figure S6**). There is no reaction coordinate for which a continuous evolution of orbitals leads to a ground-state configuration of both  $\text{PH}_3$  and  $\text{H}_2$ . In contrast, a similar analysis of orbital phase suggests that coupling of two equatorial substituents is symmetry-allowed. Indeed, this transformation is possible and has an activation barrier of  $>35$  kcal/mol ( $\omega\text{B97X-D}$ ). Axial-axial coupling is symmetry-allowed, although does not occur in a single step. After a Berry-pseudorotation the formerly-axial substituents are then equatorial and able to undergo equatorial-equatorial coupling.

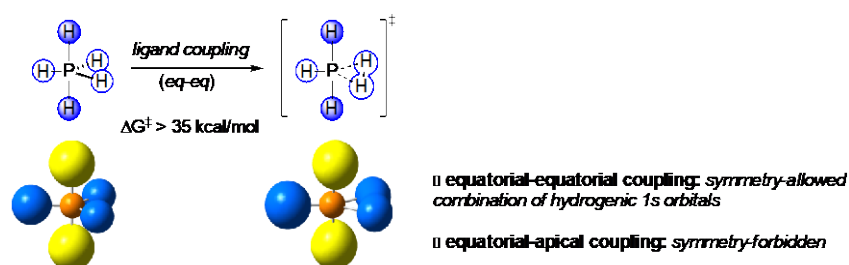

**Figure S6.** Ligand coupling in  $\text{PH}_5$  is symmetry-controlled. Computed HOMOs in the reactant and TS show equatorial-equatorial coupling is symmetry-allowed, whereas equatorial-apical coupling is symmetry-forbidden.

Computed ligand coupling transition states from phosphorane **Int-III** establish that this transformation proceeds via apical-equatorial coupling. How is this possible when such a pathway is symmetry-forbidden for the  $\text{PH}_5$  prototype? The answer lies in the fact that the new  $\sigma$ -bond results from the participation of one of the ligand's  $\pi/\pi^*$  system, allowing symmetry-allowed overlap to occur (**Figure S7**). In the TS, a  $\sigma_{\text{C-P}}$  bond interacts with the adjacent  $\pi^*_{\text{C-C}}$ , in a nucleophilic aromatic substitution ( $S_{\text{N}}\text{Ar}$ )-like process (See the *Animation of Frontier Molecular Orbital for C-C Bond Forming Event*: Movie S2). The involvement of nucleophilic  $\sigma_{\text{C-P}}$  and electrophilic  $\pi^*_{\text{C-C}}$  MOs is evident in the computed HOMO in the TS. The HOMO of the phosphorane intermediate is dominated by the  $\sigma_{\text{C-P}}$  bond.

This process is fundamentally distinct from ligand-coupling in  $\text{PH}_5$ , where both  $\sigma_{\text{P-H}}$  bonds are broken as the  $\sigma_{\text{H-H}}$  bond is formed. This mechanistic interpretation is consistent with a computed reaction coordinate, for which a stable Meisenheimer adduct is obtained from the ligand-coupling TS (the final loss of phosphinite is, however, computed to occur rather easily and irreversibly to liberate the bipyridyl product). Furthermore, the distinct involvement of the two pyridyl groups along the reaction coordinate can be seen through comparing the aromaticity at the center of each ring, as evaluated by the nuclear independent chemical shift (NICS) values in **Figure S7**. The nucleophilic (apical) pyridyl ligand shows negligible change in ring aromaticity along the reaction coordinate since the p-system undergoes no changes in bonding. In contrast, aromaticity of the electrophilic (equatorial) pyridyl ligand is completely lost along the reaction coordinate as dearomatization occurs due to C-C bond formation.

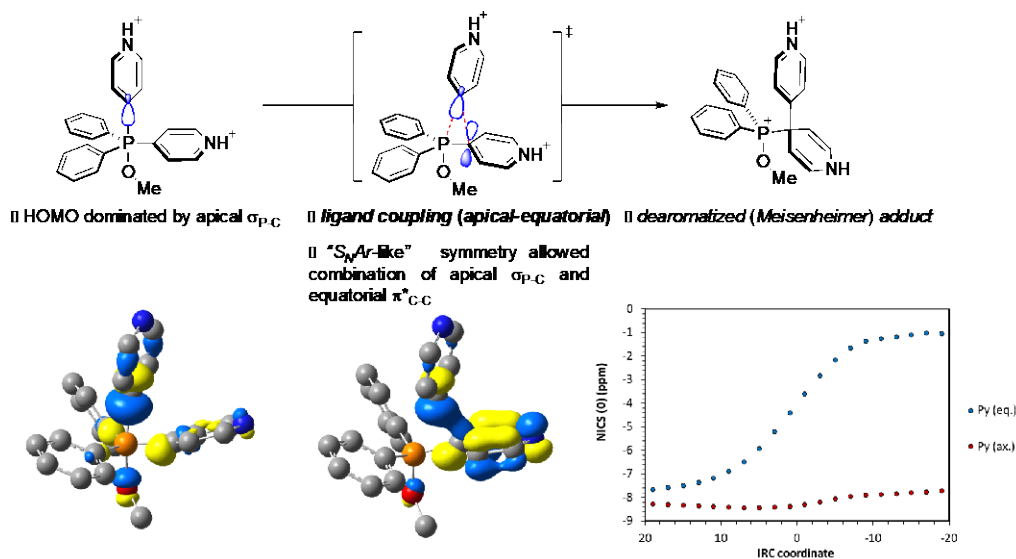

**Figure S7.** Orbital control in ligand coupling from  $[\text{Int-III}\cdot 2\text{H}]^{2+}$ . Equatorial-apical coupling is symmetry-allowed due to the involvement of the pyridyl  $\pi/\pi^*$  system.

Additionally, the competing TS that lead to RO-Py couplings were calculated. ROPy is a potential byproduct of this reaction that was previously observed when using different reaction conditions (31). Under the reaction conditions used in this study, using 2 equivalents of HCl to protonate the two pyridine groups of the initial phosphonium salt, our calculations suggest that Py-Py couplings are the favored type of coupling (**Figure S8**). Also, we determined experimentally that RO-Py couplings do not take place under basic conditions when using EtOH as the solvent (**Figure S24**).

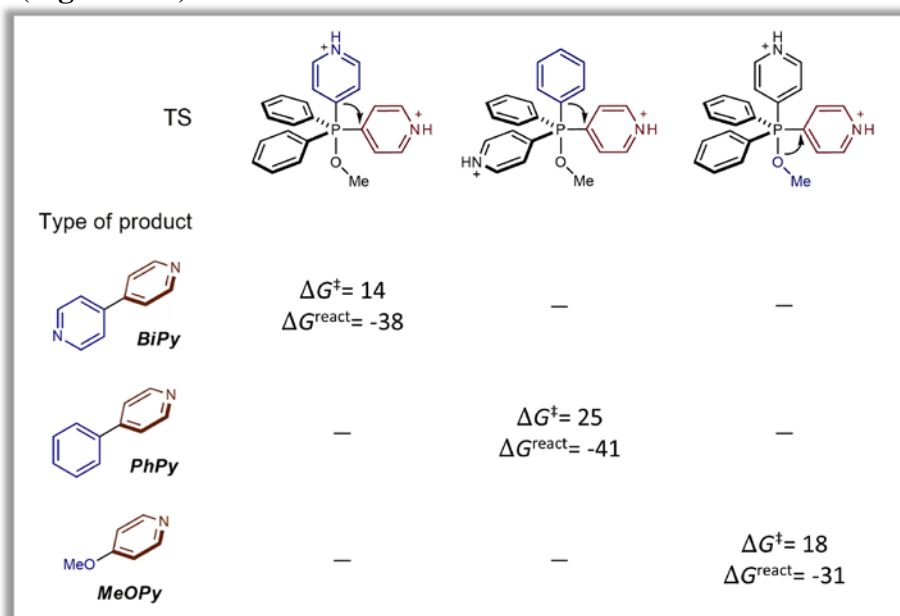

**Figure S8.**  $[\text{TS-I}\cdot 2\text{H}]^{2+}$  activation barriers ( $\Delta G^\ddagger$ ) and change of G of the reaction ( $\Delta G^{\text{react}}$ ) for different types of couplings (SMD-DLPNO-CCSD(T)/cc-pV(DT)Z// $\omega$ B97X-D/6-31+G(d), kcal/mol).

#### 4d. Computed Reaction Mechanism from **Int-III**

Gibbs free energies along the reaction coordinate calculated with the  $\omega$ B97X-D/def2-QZVPP and DLPNO-CCSD(T)/cc-pV(DT)Z methods show very similar profiles in all the pathways from **Int-III**, **[Int-III·H]<sup>+</sup>** and **[Int-III·2H]<sup>2+</sup>** (Figures S9-11). The ordering of different configurations is consistent across calculations using DFT and WFT. The reaction profiles correlate well from one method to another, showing energy variations within 3 kcal/mol across the majority of reaction steps, and the same trend upon protonation is found for both methods.

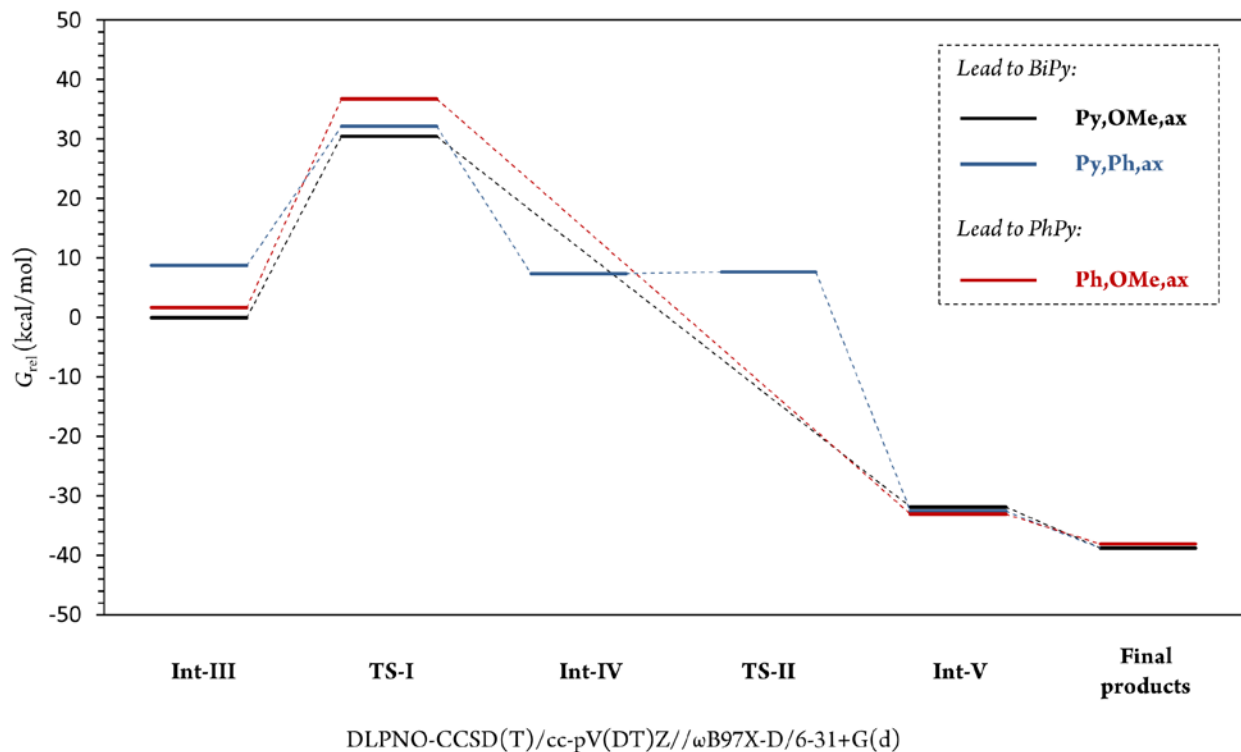

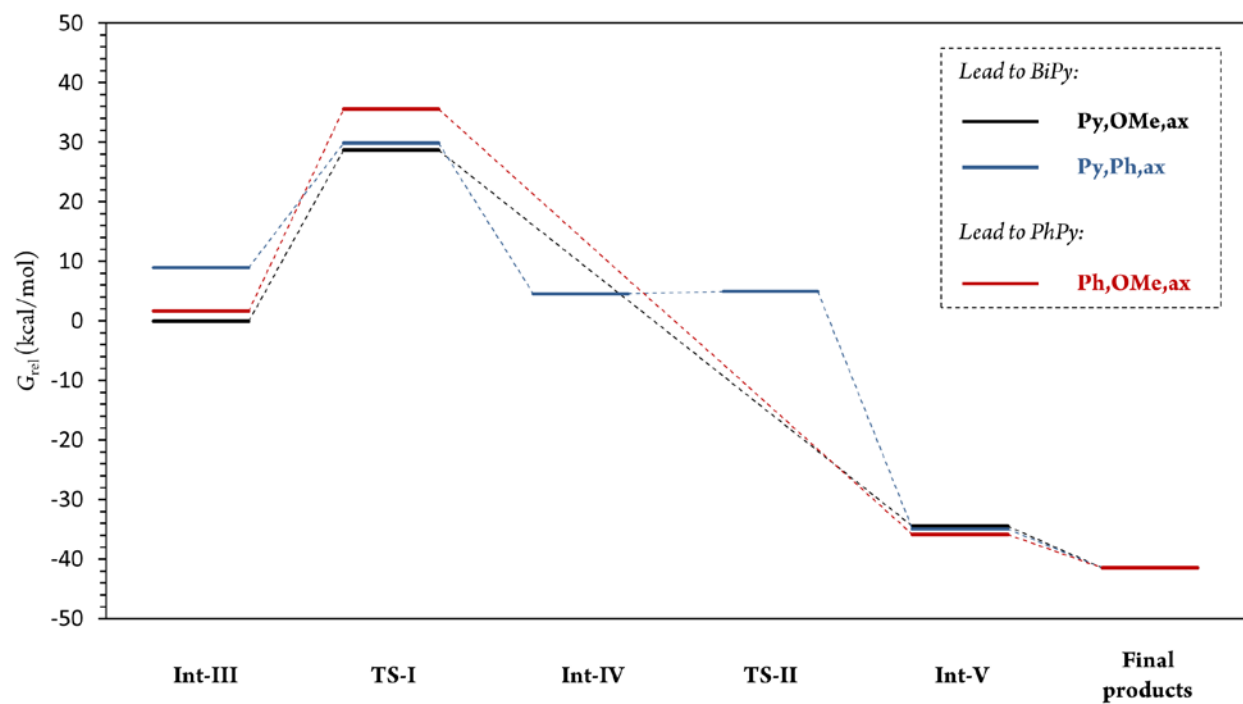

$\omega$ B97X-D/def2-QZVPP// $\omega$ B97X-D/6-31+G(d)

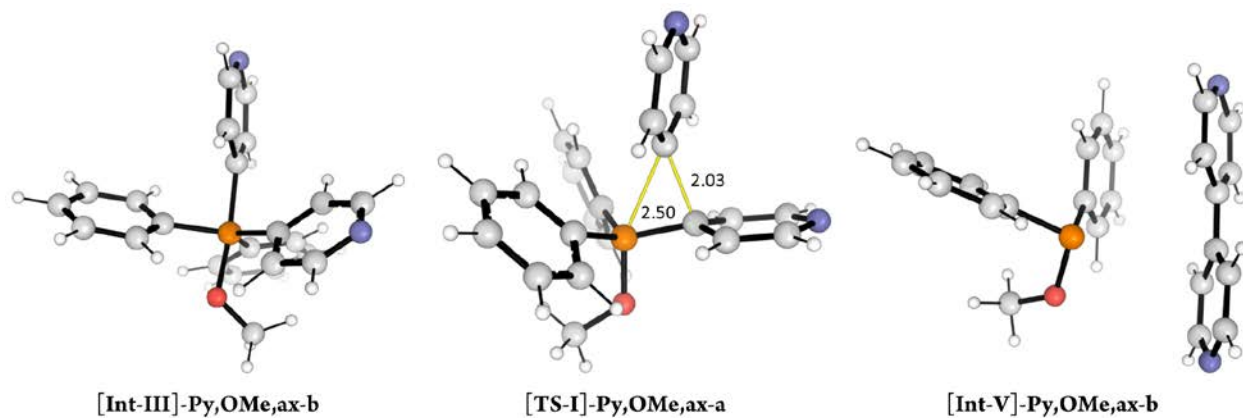

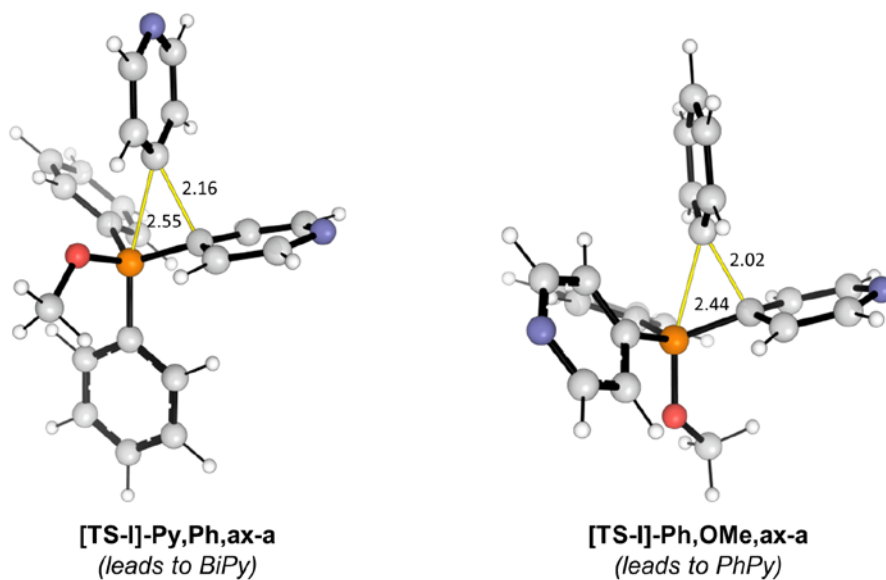

**Figure S9.** Reaction coordinate for the most favorable pathways of **Int-III**. Top: DLPNO-CCSD(T); Bottom:  $\omega$ B97X-D. Below: most favorable structures along the reaction pathway (**Py,OMe,ax**) and other competing **TS-I** steps.

**Table S4.** Important bond lengths from the [**Int-III**]-**Py,OMe,ax** pathway.

| Reaction Step                          | Distances (Å) |              |              |                |                |
|----------------------------------------|---------------|--------------|--------------|----------------|----------------|
|                                        | P-O (OMe ax)  | P-C (Py ax.) | P-C (Py eq.) | P-C (Ph eq. 1) | P-C (Ph eq. 2) |
| [ <b>Int-III</b> ]- <b>Py,OMe,ax-b</b> | 1.79          | 1.96         | 1.87         | 1.85           | 1.84           |
| [ <b>TS-I</b> ]- <b>Py,OMe,ax-a</b>    | 1.63          | 2.50         | 1.77         | 1.81           | 1.82           |
| [ <b>Int-V</b> ]- <b>Py,OMe,ax-b</b>   | 1.67          | -            | -            | 1.84           | 1.84           |



4e. Computed Reaction Mechanism from **[Int-III·H]<sup>+</sup>**

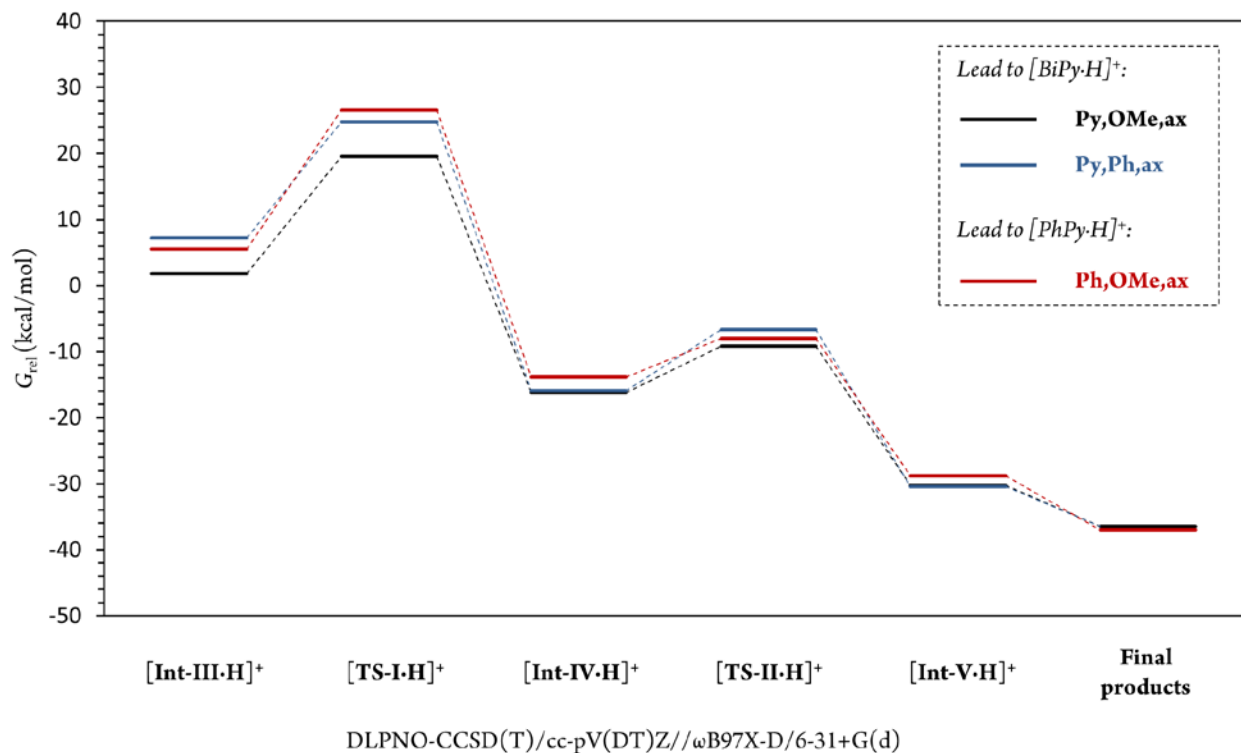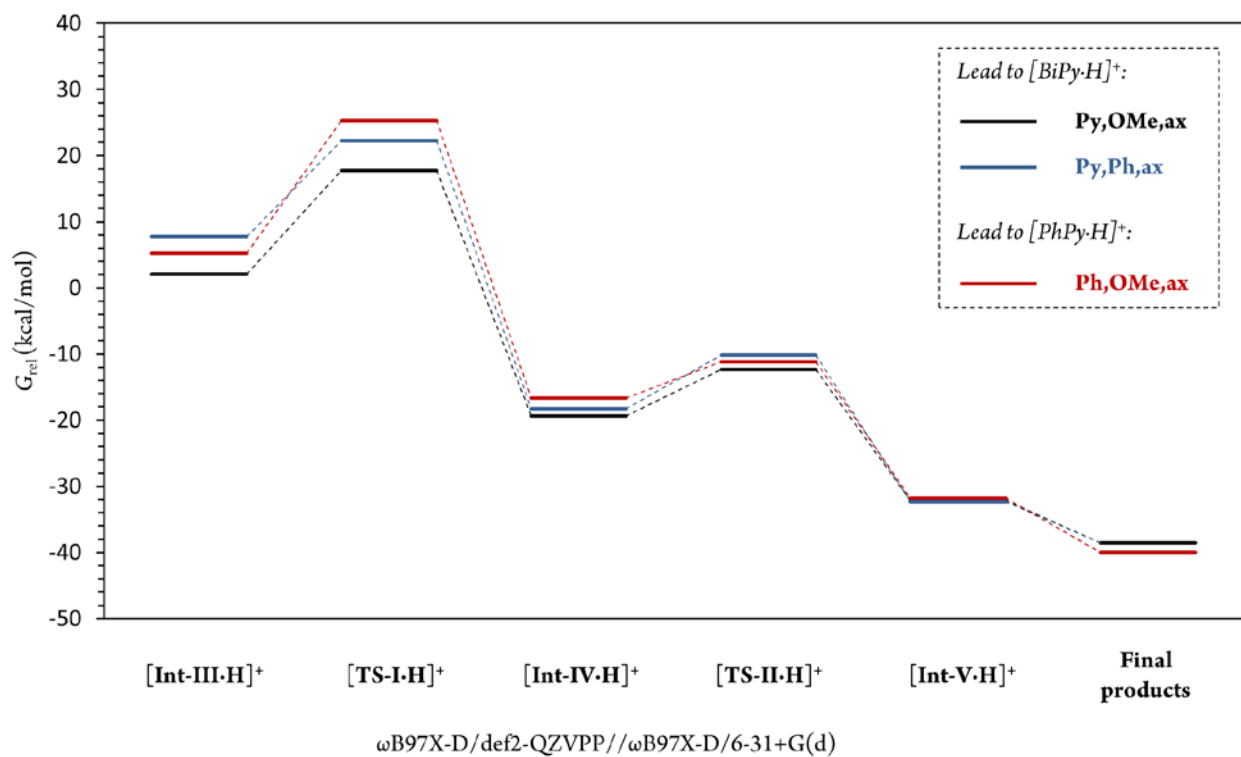

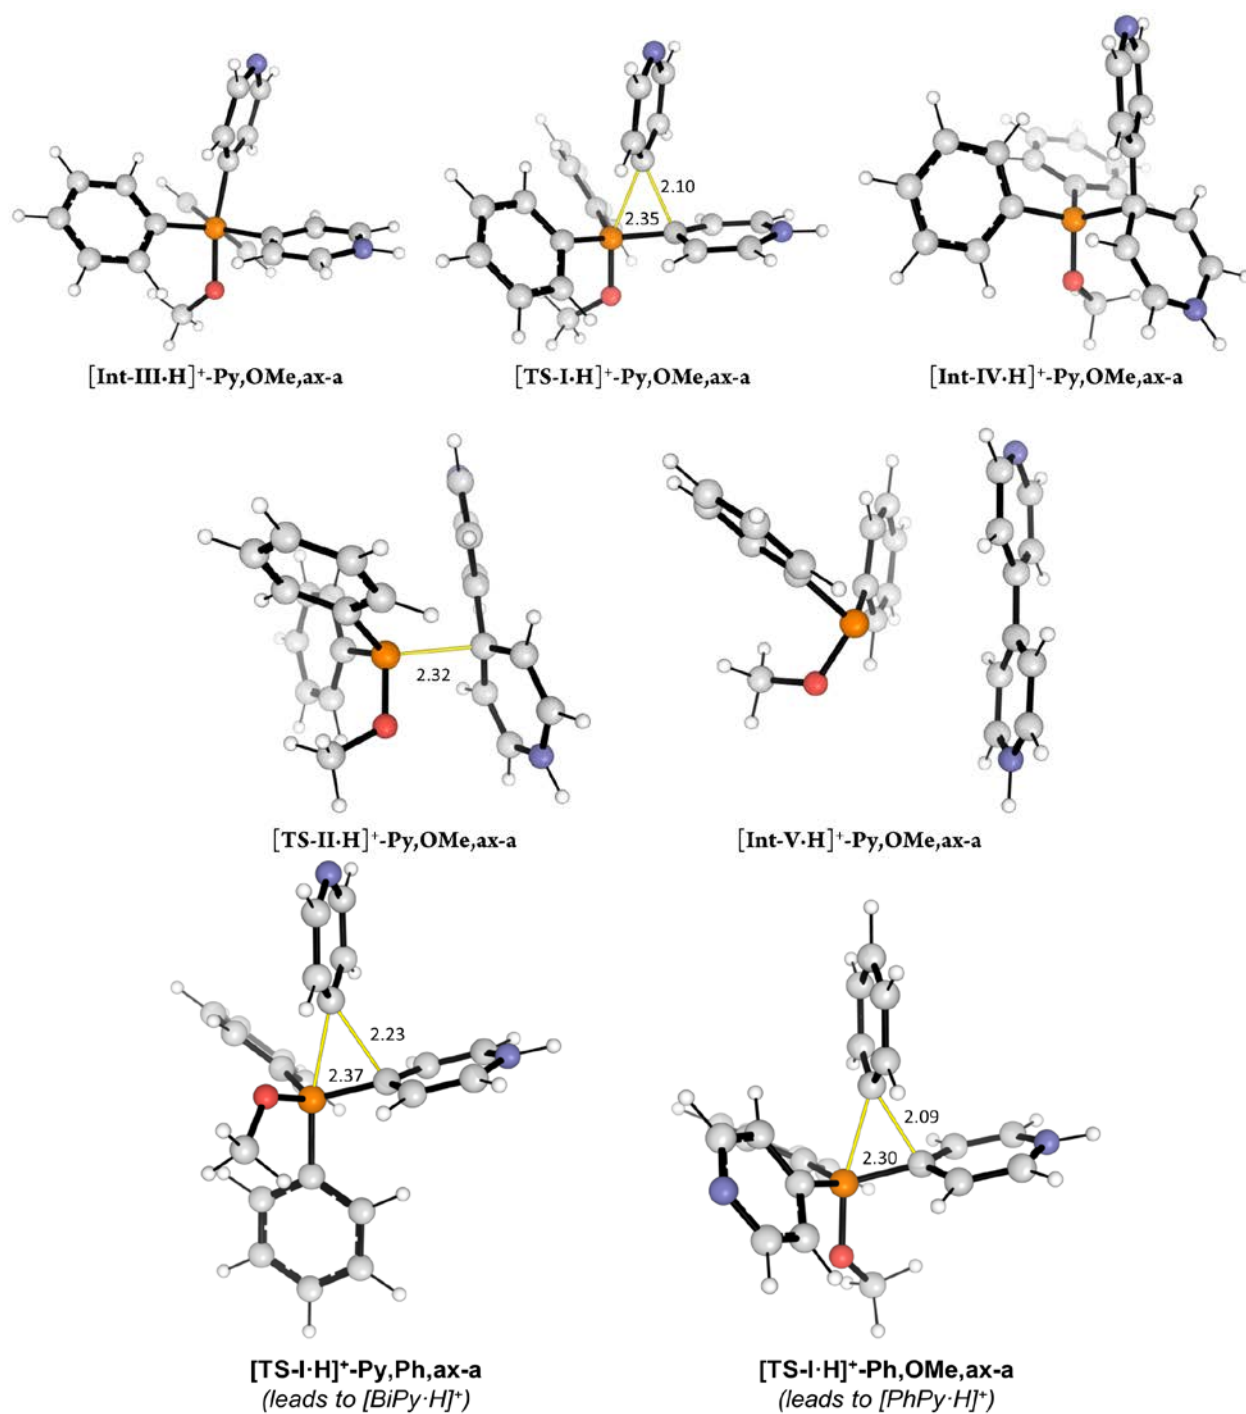

**Figure S10.** Reaction coordinate for the most favorable pathways of **[Int-III·H]<sup>+</sup>**. Top: DLPNO-CCSD(T); Bottom:  $\omega$ B97X-D. Below: most favorable structures along the reaction pathway (**Py,OMe,ax**) and other competing **[TS-I·H]<sup>+</sup>** steps.

**Table S5.** Important bond lengths from the  $[\text{Int-III}\cdot\text{H}]^+-\text{Py,OMe,ax}$  pathway.

| Reaction Step                                        | Distances (Å) |              |              |                |                |
|------------------------------------------------------|---------------|--------------|--------------|----------------|----------------|
|                                                      | P-O (OMe ax)  | P-C (Py ax.) | P-C (Py eq.) | P-C (Ph eq. 1) | P-C (Ph eq. 2) |
| $[\text{Int-III}\cdot\text{H}]^+-\text{Py,OMe,ax-a}$ | 1.77          | 1.95         | 1.87         | 1.85           | 1.84           |
| $[\text{TS-I}\cdot\text{H}]^+-\text{Py,OMe,ax-a}$    | 1.65          | 2.35         | 1.76         | 1.82           | 1.82           |
| $[\text{Int-IV}\cdot\text{H}]^+-\text{Py,OMe,ax-a}$  | 1.60          | -            | 1.90         | 1.80           | 1.80           |
| $[\text{TS-II}\cdot\text{H}]^+-\text{Py,OMe,ax-a}$   | 1.62          | -            | 2.32         | 1.81           | 1.81           |
| $[\text{Int-V}\cdot\text{H}]^+-\text{Py,OMe,ax-a}$   | 1.67          | -            | -            | 1.84           | 1.84           |

4f. Computed Reaction Mechanism from  $[\text{Int-III}\cdot\text{2H}]^{2+}$

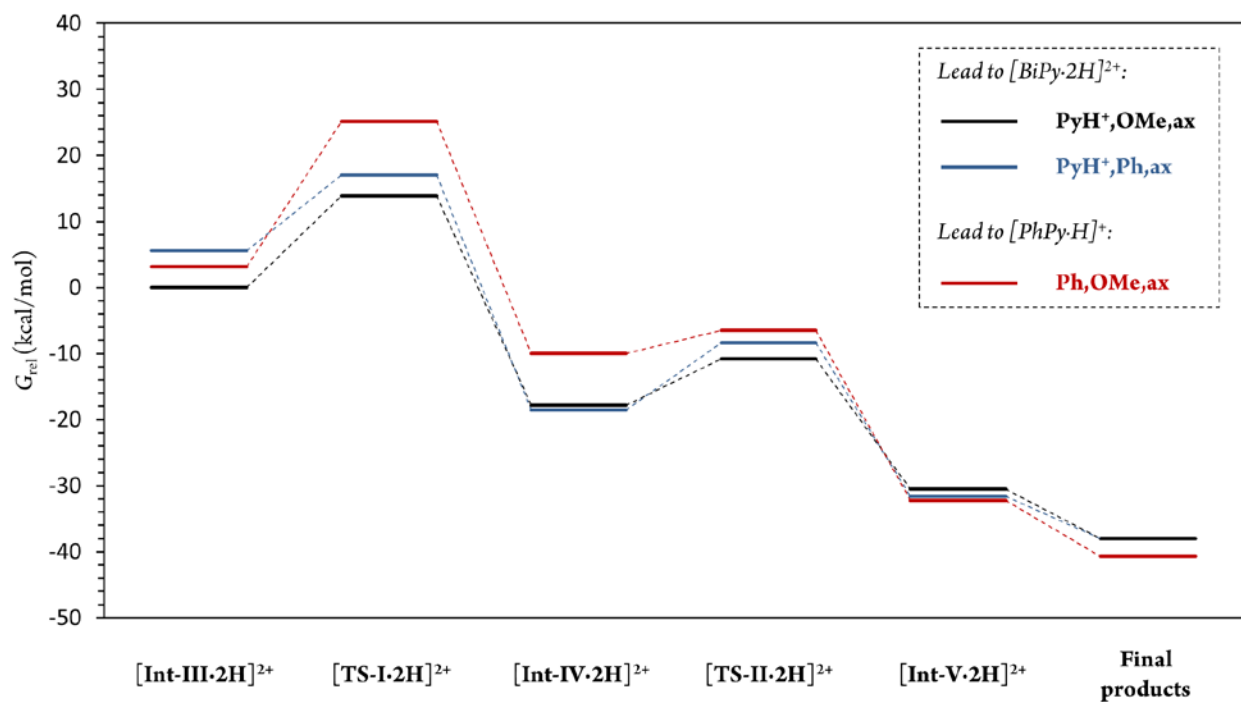

DLPNO-CCSD(T)/cc-pV(DT)Z// $\omega$ B97X-D/6-31+G(d)

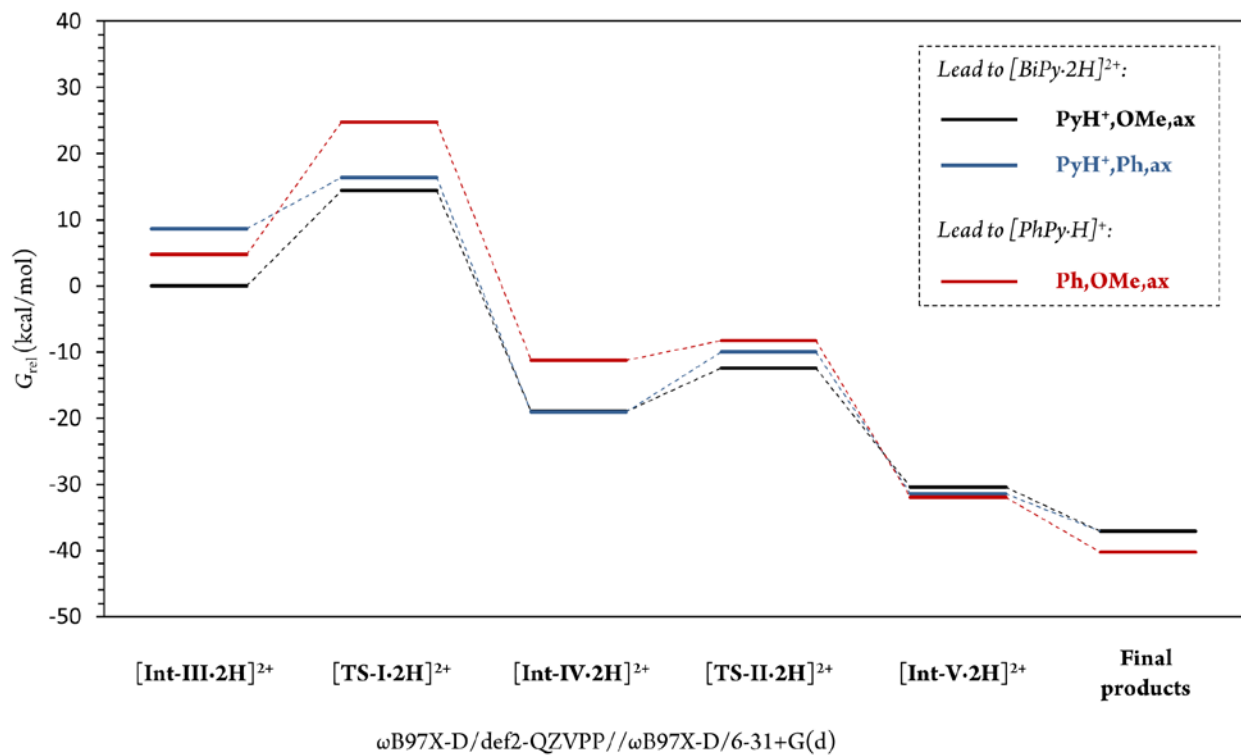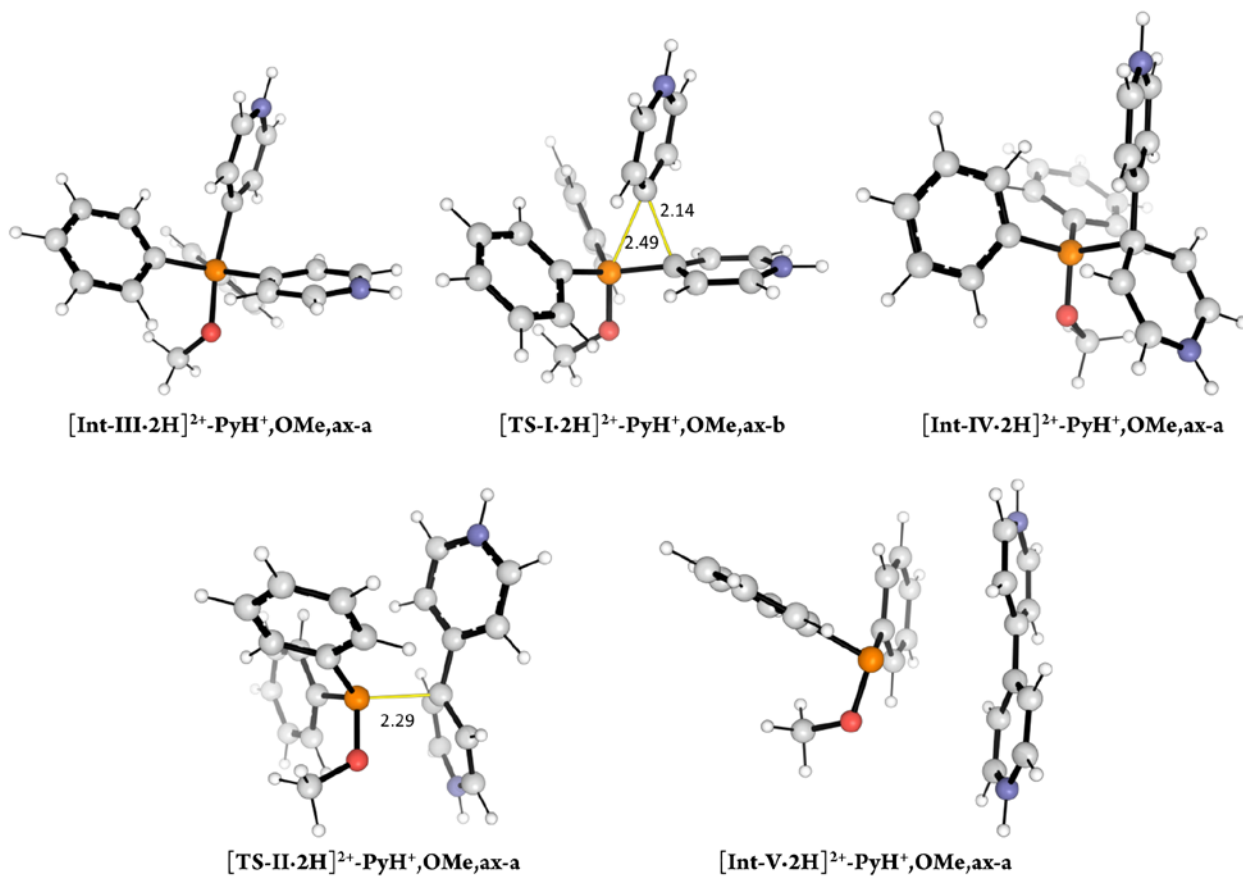

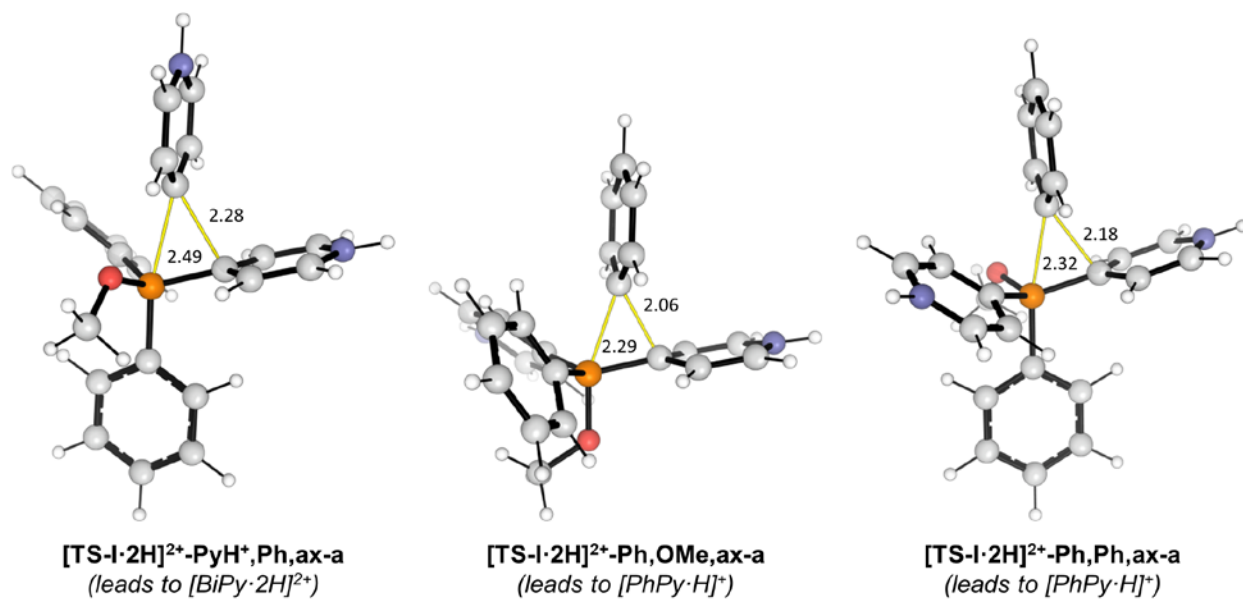

**Figure S11.** Reaction coordinate for the most favorable pathways of  $[\text{Int-III}\cdot 2\text{H}]^{2+}$ . Top: DLPNO-CCSD(T); Bottom:  $\omega\text{B97X-D}$ . Below: most favorable structures along the reaction pathway ( $\text{PyH}^+$ ,  $\text{OMe,ax}$ ) and other competing  $[\text{TS-I}\cdot 2\text{H}]^{2+}$  steps.

**Table S6.** Important bond lengths from the  $[\text{Int-III}\cdot 2\text{H}]^{2+}\text{-PyH}^+$ ,  $\text{OMe,ax}$  pathway.

| Reaction Step                                                           | Distances (Å)            |              |              |                |                |
|-------------------------------------------------------------------------|--------------------------|--------------|--------------|----------------|----------------|
|                                                                         | P-O (OMe <sub>ax</sub> ) | P-C (Py ax.) | P-C (Py eq.) | P-C (Ph eq. 1) | P-C (Ph eq. 2) |
| $[\text{Int-III}\cdot 2\text{H}]^{2+}\text{-PyH}^+$ , $\text{OMe,ax-a}$ | 1.73                     | 1.99         | 1.86         | 1.85           | 1.84           |
| $[\text{TS-I}\cdot 2\text{H}]^{2+}\text{-PyH}^+$ , $\text{OMe,ax-b}$    | 1.63                     | 2.49         | 1.78         | 1.81           | 1.81           |
| $[\text{Int-IV}\cdot 2\text{H}]^{2+}\text{-PyH}^+$ , $\text{OMe,ax-a}$  | 1.59                     | -            | 1.91         | 1.80           | 1.80           |
| $[\text{TS-II}\cdot 2\text{H}]^{2+}\text{-PyH}^+$ , $\text{OMe,ax-a}$   | 1.62                     | -            | 2.29         | 1.81           | 1.80           |
| $[\text{Int-V}\cdot 2\text{H}]^{2+}\text{-PyH}^+$ , $\text{OMe,ax-a}$   | 1.66                     | -            | -            | 1.84           | 1.84           |

#### 4g. Solvation Model Validation of SMD Using COSMO-RS

**[Int-III·H]<sup>+</sup>** and **[Int-III·2H]<sup>2+</sup>** pathways involved mono- and di-protonated species, which involves a high *G* of solvation (see **Table S7**). This might cause problems when using SMD, since it is known that errors in calculated solvation *G* using SMD for ions are greater than for neutral molecules (62). In order to discard large systematic errors coming from *G* of solvation, we calculated the different most stable pathways for **Int-III**, **[Int-III·H]<sup>+</sup>** and **[Int-III·2H]<sup>2+</sup>** with COSMO-RS (87-91), which calculates *G* of solvation differently to SMD.

We adapted the standard procedure that COSMO-RS follows to calculate solvation *G*, since this procedure involves ground state optimization of molecules and does not allow for inclusion of transition states. In the standard protocol, first the program optimizes ground state structures in the gas and solution phase using Turbomole with BP/TZVP (COSMO), followed by single-point energy calculations in the two phases using Turbomole with BP/TZVPD (COSMO) and a fine grid marching tetrahedron cavity (FINE). We adapted this protocol to be able to model transition states. For this, we directly optimized geometries of ground and transition states with  $\omega$ B97X-D/6-31+G(d) in gas and solution phase using Gaussian 16, and then we employed these optimized geometries as the input files for the final single-point calculations in gas and solution phase performed with COSMO-RS (BP/TZVPD (FINE, COSMO)) at 80 °C. EtOH was used as the solvent for the solvation *G* calculations, using also geometries optimized with  $\omega$ B97X-D/6-31+G(d) as the ground and transition states studied.

In order to generate the reaction *G* profiles with the calculated COSMO-RS solvation *G*, first the *G* of the structures in gas phase was calculated as explained in the computational methods, including QHA entropy and single-point energy corrections using DLPNO-CCSD(T)/cc-pV(DT)Z// $\omega$ B97X-D/6-31+G(d) and  $\omega$ B97X-D/def2-QZVPP// $\omega$ B97X-D/6-31+G(d) at 80 °C. Then the solvation *G* values calculated with COSMO-RS were added to the *G* values in gas phase to obtain the final *G* in solution (**Tables S7-8**). In all the cases studied, similar *G* profiles were observed using the initial SMD and the generated COSMO-RS results (**Figure S12-13**), which suggests that there are not any major systematic errors coming from the calculation of *G* of solvation.

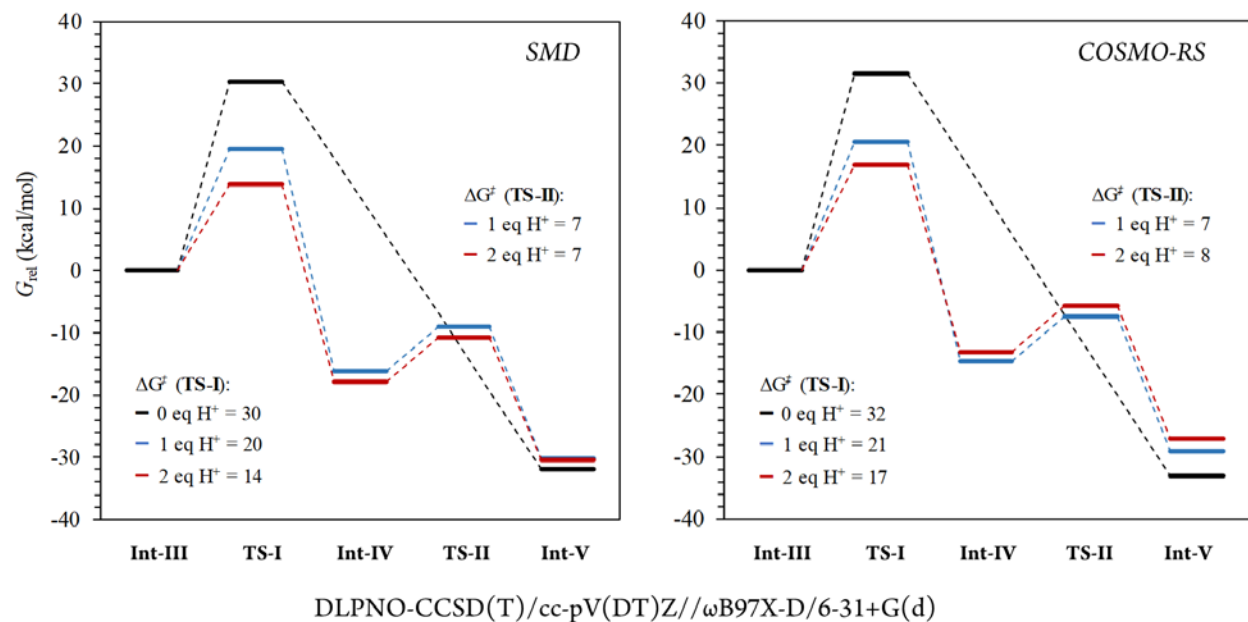

**Figure S12.** G profiles of the most stable reaction pathways of **Int-III**, **[Int-III·H]<sup>+</sup>** and **[Int-III·2H]<sup>2+</sup>** calculated with DLPNO-CCSD(T)/cc-pV(DT)Z// $\omega$ B97X-D/6-31+G(d).

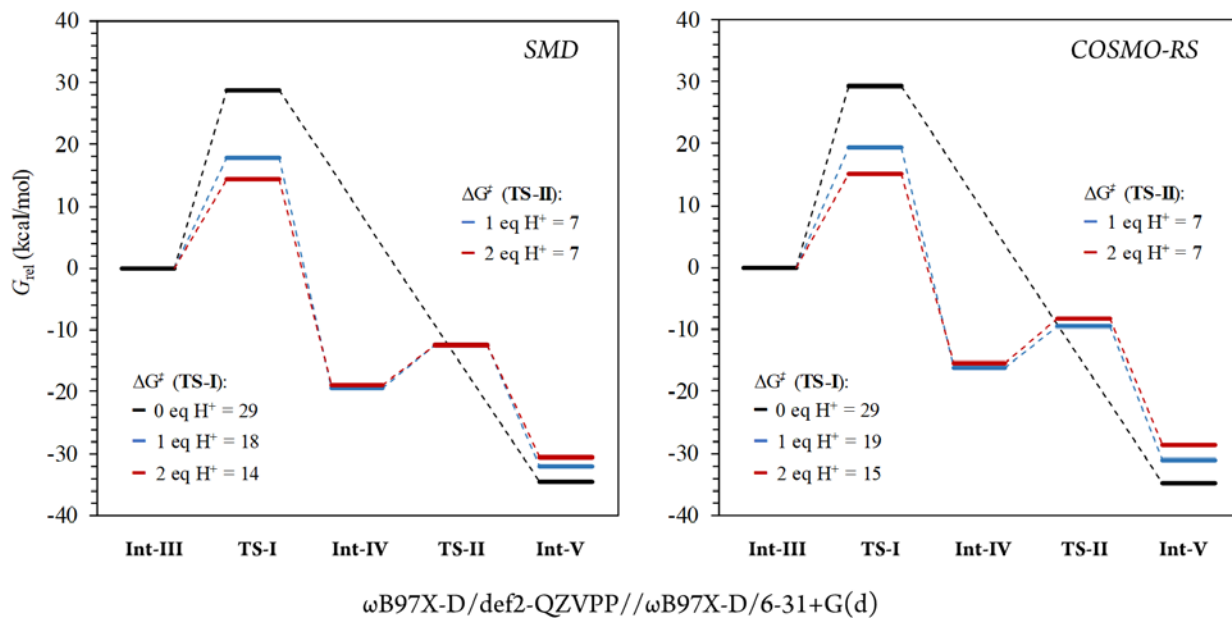

**Figure S13.** G profiles of the most stable reaction pathways of **Int-III**, **[Int-III·H]<sup>+</sup>** and **[Int-III·2H]<sup>2+</sup>** calculated with  $\omega$ B97X-D/def2-QZVPP// $\omega$ B97X-D/6-31+G(d).

**Table S7.** Thermochemical data including absolute energies, zero-point energies (ZPE), T·S, G of solvation ( $G_{\text{solv}}$ ) and G of the most stable reaction pathways of **Int-III**, **[Int-III·H]<sup>+</sup>** and **[Int-III·2H]<sup>2+</sup>** using gas phase optimizations ( $G_{\text{GP}}$ ) with DLPNO-CCSD(T)/cc-pV(DT)Z// $\omega$ B97X-D/6-31+G(d) and COSMO-RS.

| System                                                    | E (kcal/mol) | ZPE (kcal/mol) | T·S (kcal/mol) | $G_{\text{GP}}$ (kcal/mol) | $G_{\text{solv}}$ (kcal/mol) | $G_{\text{GP}} + G_{\text{solv}}$ (kcal/mol) | $G_{\text{rel}}$ (kcal/mol) |
|-----------------------------------------------------------|--------------|----------------|----------------|----------------------------|------------------------------|----------------------------------------------|-----------------------------|
| <b>[Int-III]-Py,OMe,ax-b</b>                              | -886841.41   | 244.83         | 60.08          | -886635.89                 | -18.66                       | -886654.55                                   | 0.00                        |
| <b>[TS-I]-Py,OMe,ax-a</b>                                 | -886801.45   | 243.67         | 59.85          | -886597.04                 | -25.95                       | -886622.99                                   | 31.56                       |
| <b>[Int-V]-Py,OMe,ax-a</b>                                | -886872.71   | 244.61         | 62.51          | -886669.28                 | -18.36                       | -886687.64                                   | -33.09                      |
| <b>[Int-III·H]<sup>+</sup>-PyH<sup>+</sup>,OMe,ax-b</b>   | -887087.27   | 254.00         | 60.36          | -886872.74                 | -56.20                       | -886928.95                                   | 0.00                        |
| <b>[TS-I·H]<sup>+</sup>-Py,OMe,ax-a</b>                   | -887071.33   | 252.97         | 60.44          | -886858.10                 | -50.32                       | -886908.42                                   | 20.53                       |
| <b>[Int-IV·H]<sup>+</sup>-Py,OMe,ax-b</b>                 | -887111.52   | 253.88         | 60.59          | -886897.20                 | -46.39                       | -886943.59                                   | -14.64                      |
| <b>[TS-II·H]<sup>+</sup>-Py,OMe,ax-a</b>                  | -887101.03   | 253.17         | 60.65          | -886887.68                 | -48.74                       | -886936.43                                   | -7.48                       |
| <b>[Int-V·H]<sup>+</sup>-Py,OMe,ax-a</b>                  | -887113.40   | 253.71         | 62.05          | -886900.41                 | -57.69                       | -886958.11                                   | -29.16                      |
| <b>[Int-III·2H]<sup>2+</sup>-PyH<sup>+</sup>,OMe,ax-a</b> | -887271.38   | 263.08         | 60.43          | -887047.79                 | -151.01                      | -887198.80                                   | 0.00                        |
| <b>[TS-I·2H]<sup>2+</sup>-PyH<sup>+</sup>,OMe,ax-b</b>    | -887261.62   | 261.82         | 60.58          | -887039.46                 | -142.47                      | -887181.93                                   | 16.86                       |
| <b>[Int-IV·2H]<sup>2+</sup>-PyH<sup>+</sup>,OMe,ax-b</b>  | -887293.14   | 262.61         | 60.96          | -887070.31                 | -141.73                      | -887212.04                                   | -13.24                      |
| <b>[TS-II·2H]<sup>2+</sup>-PyH<sup>+</sup>,OMe,ax-a</b>   | -887282.83   | 261.92         | 61.27          | -887061.21                 | -143.26                      | -887204.46                                   | -5.67                       |
| <b>[Int-V·2H]<sup>2+</sup>-PyH<sup>+</sup>,OMe,ax-a</b>   | -887291.94   | 262.56         | 62.07          | -887070.06                 | -155.75                      | -887225.81                                   | -27.01                      |

**Table S8.** Thermochemical data including absolute energies, zero-point energies (ZPE), T·S, G of solvation ( $G_{\text{solv}}$ ) and G of the most stable reaction pathways of **Int-III**, **[Int-III·H]<sup>+</sup>** and **[Int-III·2H]<sup>2+</sup>** using gas phase optimizations ( $G_{\text{GP}}$ ) with  $\omega\text{B97X-D/def2-QZVPP//}\omega\text{B97X-D/6-31+G(d)}$  and COSMO-RS.

| System                                                    | E<br>(kcal/mol) | ZPE<br>(kcal/mol) | T·S<br>(kcal/mol) | $G_{\text{GP}}$<br>(kcal/mol) | $G_{\text{solv}}$<br>(kcal/mol) | $G_{\text{GP}} + G_{\text{solv}}$<br>(kcal/mol) | $G_{\text{rel}}$<br>(kcal/mol) |
|-----------------------------------------------------------|-----------------|-------------------|-------------------|-------------------------------|---------------------------------|-------------------------------------------------|--------------------------------|
| <b>[Int-III]-Py,OMe,ax-b</b>                              | -888055.66      | 244.83            | 60.08             | -887850.14                    | -18.66                          | -887868.80                                      | 0.00                           |
| <b>[TS-I]-Py,OMe,ax-a</b>                                 | -888017.97      | 243.67            | 59.85             | -887813.55                    | -25.95                          | -887839.50                                      | 29.30                          |
| <b>[Int-V]-Py,OMe,ax-a</b>                                | -888088.64      | 244.61            | 62.51             | -887885.20                    | -18.36                          | -887903.57                                      | -34.77                         |
| <b>[Int-III·H]<sup>+</sup>-PyH<sup>+</sup>,OMe,ax-b</b>   | -888305.57      | 254.00            | 60.36             | -888091.05                    | -56.20                          | -888147.25                                      | 0.00                           |
| <b>[TS-I·H]<sup>+</sup>-Py,OMe,ax-a</b>                   | -888290.81      | 252.97            | 60.44             | -888077.58                    | -50.32                          | -888127.91                                      | 19.34                          |
| <b>[Int-IV·H]<sup>+</sup>-Py,OMe,ax-b</b>                 | -888331.30      | 253.88            | 60.59             | -888116.98                    | -46.39                          | -888163.37                                      | -16.12                         |
| <b>[TS-II·H]<sup>+</sup>-Py,OMe,ax-a</b>                  | -888321.42      | 253.17            | 60.65             | -888108.08                    | -48.74                          | -888156.82                                      | -9.57                          |
| <b>[Int-V·H]<sup>+</sup>-Py,OMe,ax-a</b>                  | -888333.53      | 253.71            | 62.05             | -888120.53                    | -57.69                          | -888178.23                                      | -30.98                         |
| <b>[Int-III·2H]<sup>2+</sup>-PyH<sup>+</sup>,OMe,ax-a</b> | -888493.54      | 263.08            | 60.43             | -888269.95                    | -151.01                         | -888420.96                                      | 0.00                           |
| <b>[TS-I·2H]<sup>2+</sup>-PyH<sup>+</sup>,OMe,ax-b</b>    | -888485.41      | 261.82            | 60.58             | -888263.25                    | -142.47                         | -888405.72                                      | 15.24                          |
| <b>[Int-IV·2H]<sup>2+</sup>-PyH<sup>+</sup>,OMe,ax-b</b>  | -888517.59      | 262.61            | 60.96             | -888294.77                    | -141.73                         | -888436.50                                      | -15.54                         |
| <b>[TS-II·2H]<sup>2+</sup>-PyH<sup>+</sup>,OMe,ax-a</b>   | -888507.45      | 261.92            | 61.27             | -888285.83                    | -143.26                         | -888429.09                                      | -8.13                          |
| <b>[Int-V·2H]<sup>2+</sup>-PyH<sup>+</sup>,OMe,ax-a</b>   | -888515.76      | 262.56            | 62.07             | -888293.88                    | -155.75                         | -888449.63                                      | -28.68                         |



#### 4h. NBO Analysis

We carried out an IRC analysis starting from [TS-I-2H]<sup>2+</sup>-PyH<sup>+</sup>,OMe,ax-b (conformations **a** and **b** lead to similar results) containing 40 points, in which point 0 represents the **TS-I** and points 20 and -20 represent the end points obtained towards the **Int-III** and **Int-IV** steps, respectively (**Figure S14**). We then calculated Wiberg bond orders of the various P-C/P-O bonds and electron populations of the two lone electron pairs of the oxygen atom (LP<sub>Ox</sub>) from an NBO analysis every two IRC points (**Tables S9-10**).

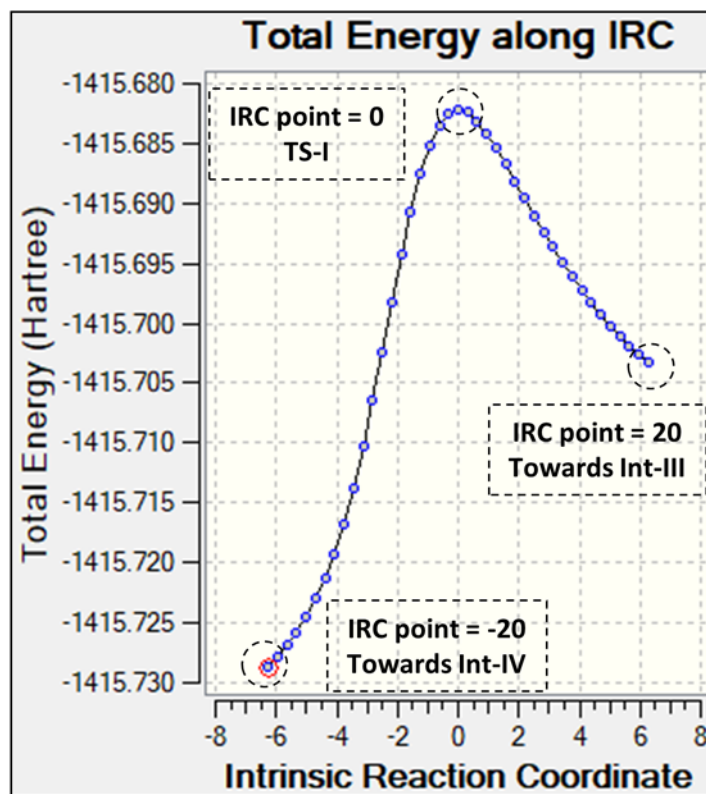

**Figure S14.** Enumeration of the points comprising the IRC analysis.

**Table S9.** Wiberg bond orders of different bonds involved in the **TS-I** step along the IRC analysis.

| IRC step number | Wiberg Bond Orders |                  |                       |
|-----------------|--------------------|------------------|-----------------------|
|                 | C-C bond formation | P-C bond (axial) | P-C bond (equatorial) |
| 19              | 0.0634             | 0.5838           | 0.8132                |
| 17              | 0.0665             | 0.5644           | 0.8165                |
| 15              | 0.0705             | 0.5411           | 0.8199                |
| 13              | 0.0762             | 0.5140           | 0.8233                |
| 11              | 0.0846             | 0.4827           | 0.8273                |
| 9               | 0.0977             | 0.4465           | 0.8319                |
| 7               | 0.1186             | 0.4048           | 0.8375                |
| 5               | 0.1538             | 0.3556           | 0.8446                |

|     |        |        |        |
|-----|--------|--------|--------|
| 3   | 0.2105 | 0.2992 | 0.8528 |
| 1   | 0.2951 | 0.2379 | 0.8609 |
| -1  | 0.4062 | 0.1773 | 0.8658 |
| -3  | 0.5304 | 0.1256 | 0.8658 |
| -5  | 0.6504 | 0.0862 | 0.8609 |
| -7  | 0.7528 | 0.0585 | 0.8523 |
| -9  | 0.8315 | 0.0403 | 0.8416 |
| -11 | 0.8864 | 0.0290 | 0.8300 |
| -13 | 0.9188 | 0.0221 | 0.8196 |
| -15 | 0.9351 | 0.0182 | 0.8121 |
| -17 | 0.9440 | 0.0160 | 0.8073 |
| -19 | 0.9489 | 0.0143 | 0.8048 |

**Table S10.** LP<sub>Ox</sub> along the IRC analysis.

| IRC step number | Electron population  |                      |
|-----------------|----------------------|----------------------|
|                 | Lone electron pair 1 | Lone electron pair 2 |
| 19              | 1.9506               | 1.9111               |
| 17              | 1.9508               | 1.9112               |
| 15              | 1.9509               | 1.9111               |
| 13              | 1.9509               | 1.9108               |
| 11              | 1.9507               | 1.9102               |
| 9               | 1.9503               | 1.9092               |
| 7               | 1.9497               | 1.9078               |
| 5               | 1.9491               | 1.9061               |
| 3               | 1.9483               | 1.9042               |
| 1               | 1.9476               | 1.9025               |
| -1              | 1.9469               | 1.9011               |
| -3              | 1.9463               | 1.9002               |
| -5              | 1.9456               | 1.8993               |
| -7              | 1.9447               | 1.8984               |
| -9              | 1.9439               | 1.8974               |
| -11             | 1.9431               | 1.8963               |
| -13             | 1.9425               | 1.8957               |
| -15             | 1.9421               | 1.8957               |
| -17             | 1.9416               | 1.8961               |
| -19             | 1.9411               | 1.8968               |

## 5. Potential Energy Surface (PES) Relaxed Scans

All the scans were performed using  $\omega$ B97X-D/6-31+G(d) in gas phase and freezing the coordinates of the P and O atoms involved in the forming P-O bond. Distances at which the two atoms were frozen increased progressively by 0.1 Å starting from 1.71 Å, which is approximately the typical distance for P-O bonds observed in the different systems.

In agreement with the previous experimental results, when using an alkoxy salt, the RO<sup>-</sup> attack to the initial phosphonium salt is barrierless and exergonic and, therefore, this should not be the rate-limiting step (RLS) of the process (**Figure S15**, left). Instead, the RLS in this case should be the RO<sup>-</sup> attack to the Py group (**TS-I**, **Figure S9**). Contrarily, the addition of ROH to the initial phosphonium salt shows a high activation energy in the computational energy scans, which suggests that this is the RLS and agrees with the experimental kinetic studies (**Figure S15**, right). Similar results were obtained using other degrees of protonation (1 and 2 eq H<sup>+</sup>).

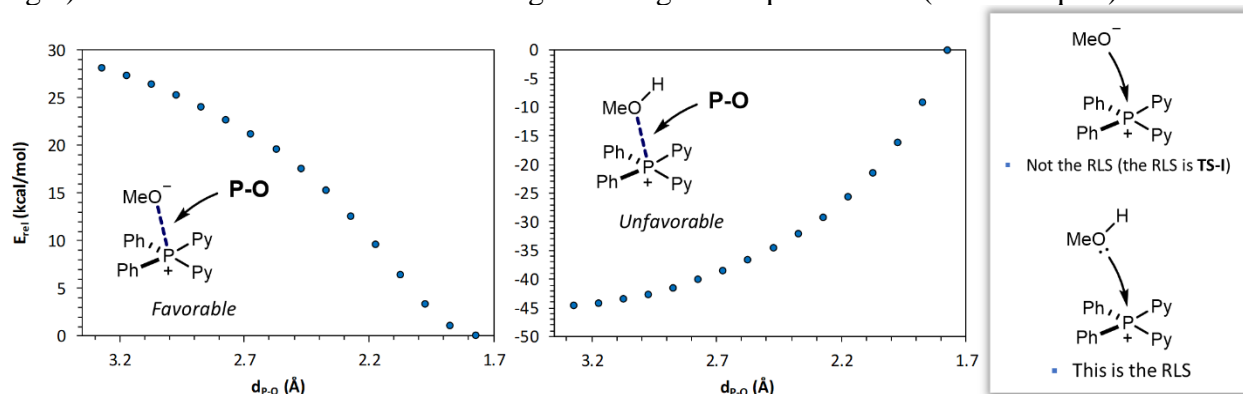

**Figure S15.** Relaxed PES scans of the addition of  $MeO^-$  (left) and  $MeOH$  (right) to  $PPh_2Py_2$  ( $\omega$ B97X-D/6-31+G(d)).

Additionally, PES relaxed scans were carried out to determine whether **Int-IV** could introduce an additional molecule of alcohol before P-C cleavage. As seen in **Figure S16**, the addition of an additional molecule of alcohol to form a P(V)-intermediate before product release shows a high activation barrier, which suggests that this is a slow reaction. Therefore, we ruled out this possibility since the competing P-C cleavage (**[TS-II·2H]<sup>2+</sup>**) has a low activation barrier of 7 kcal/mol.

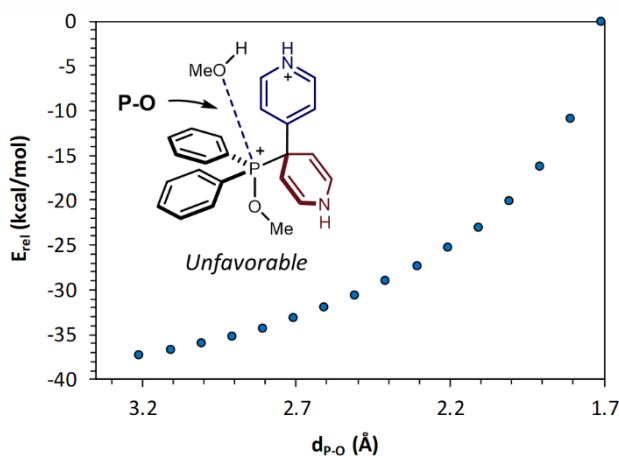

**Figure S16.** PES relaxed scan along the coordinate corresponding to the addition of  $MeOH$  to  $[Int-IV \cdot 2H]^{2+}$ . Similar results were obtained using different conformations of  $[Int-IV \cdot 2H]^{2+}$ .

## 6. Captions to Movies S1-2

### Animation of Reaction Coordinate (computational analysis) Movie S1:

**ELF analysis of [TS-I·2H]<sup>2+</sup>-PyH<sup>+</sup>,OMe,ax-a.** Electron localization function (ELF) analysis of transition state [TS-I·2H]<sup>2+</sup>-PyH<sup>+</sup>,OMe,ax-a along its intrinsic reaction coordinate (IRC), showing only the ELF part corresponding to Py-Py bond formation. This video shows a typical axial Py·H<sup>+</sup> attack to an equatorial Py·H<sup>+</sup> in reaction step **TS-I**. See supporting computational details for the methods employed, the video was created using PyMol (using a contour level of 0.88), Adobe Photoshop and Windows Movie Maker.

### Animation of Frontier Molecular Orbital for C-C Bond Forming Event (computational analysis) Movie S2:

**Orbital analysis of [TS-I·2H]<sup>2+</sup>-PyH<sup>+</sup>,OMe,ax-a.** Changes in the HOMO involved in transition state [TS-I·2H]<sup>2+</sup>-PyH<sup>+</sup>,OMe,ax-a along its intrinsic reaction coordinate (IRC). This video shows a typical axial Py·H<sup>+</sup> attack to an equatorial Py·H<sup>+</sup> in reaction step **TS-I**. See supporting computational details for the methods employed, the video was created using Multiwfn (using an isovalue of 0.08) and Windows Movie Maker.

## 7. $^1\text{H}$ NMR and $^{31}\text{P}$ NMR Salt Protonation Study

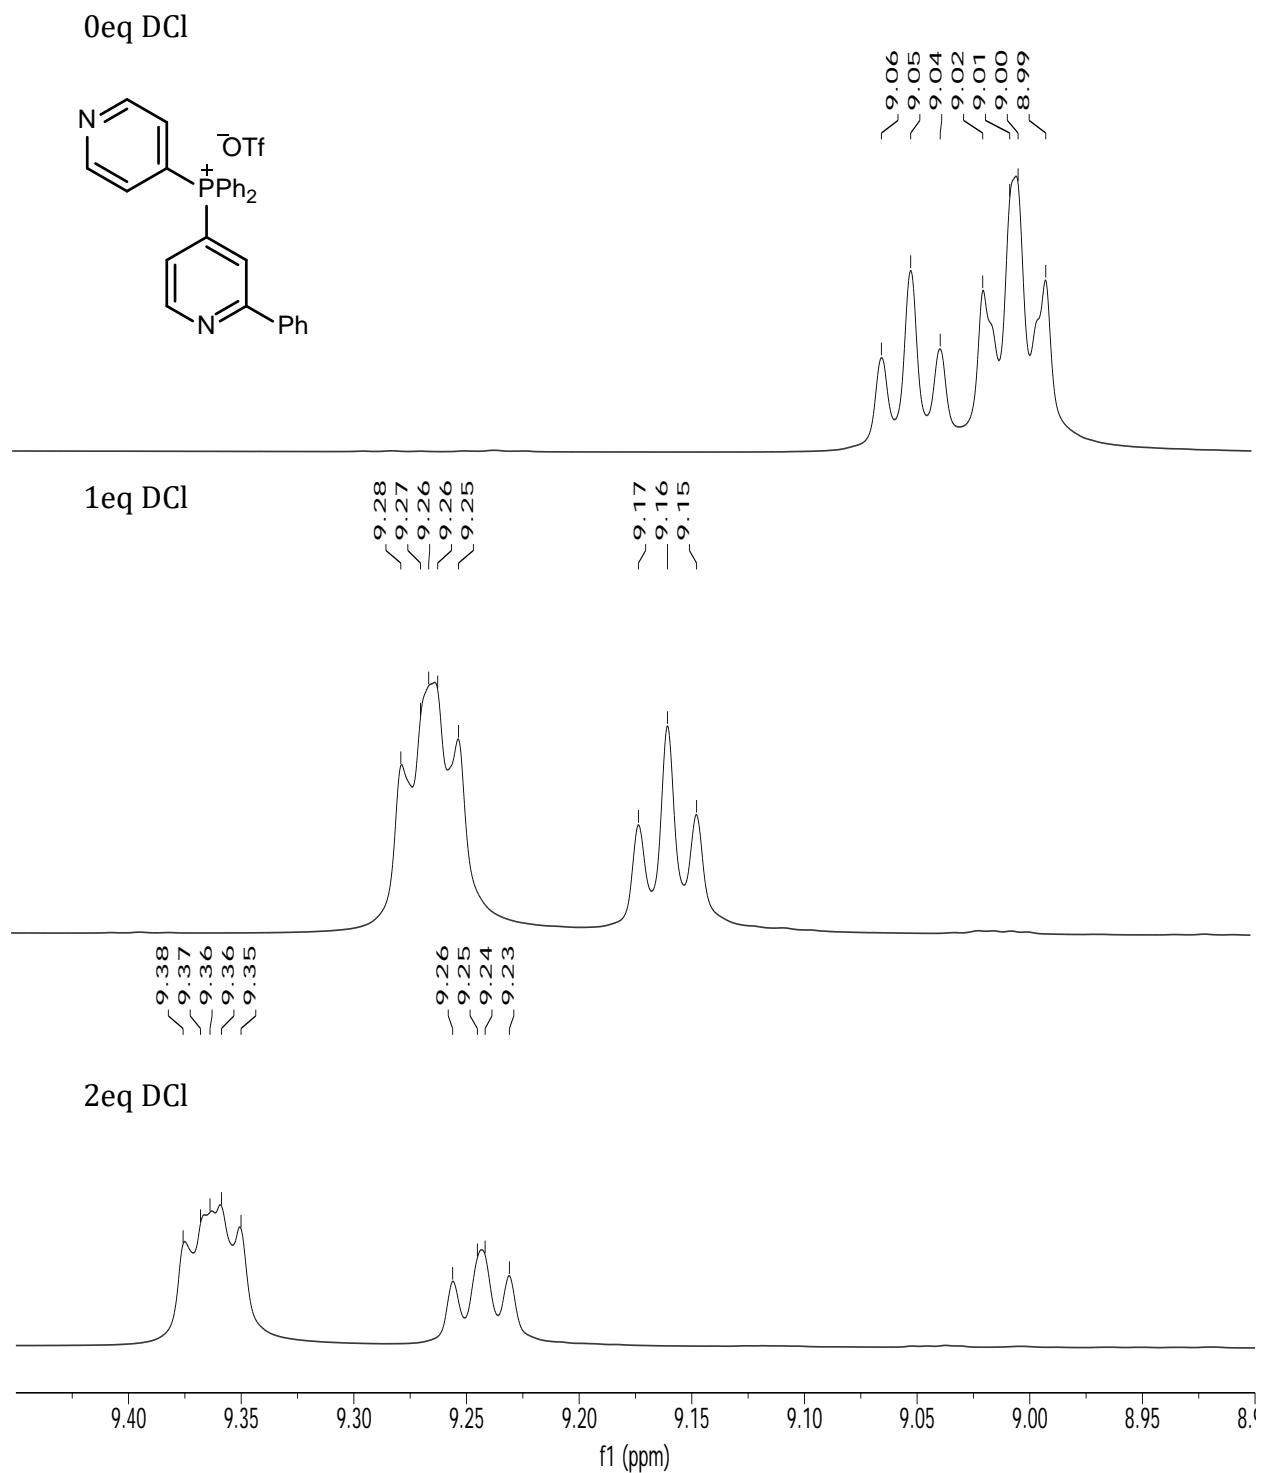

**Figure S17.**  $^1\text{H}$  NMR study to determine protonation state of phosphonium salt (**3a**) upon addition of one and two equivalents of DCl at room temperature. DCl was generated *in situ* via reaction of  $\text{CD}_3\text{OD}$  with acyl chloride.  $^1\text{H}$  NMR ran in  $\text{CD}_3\text{OD}$  and the residual solvent peak was calibrated to 3.31 ppm.

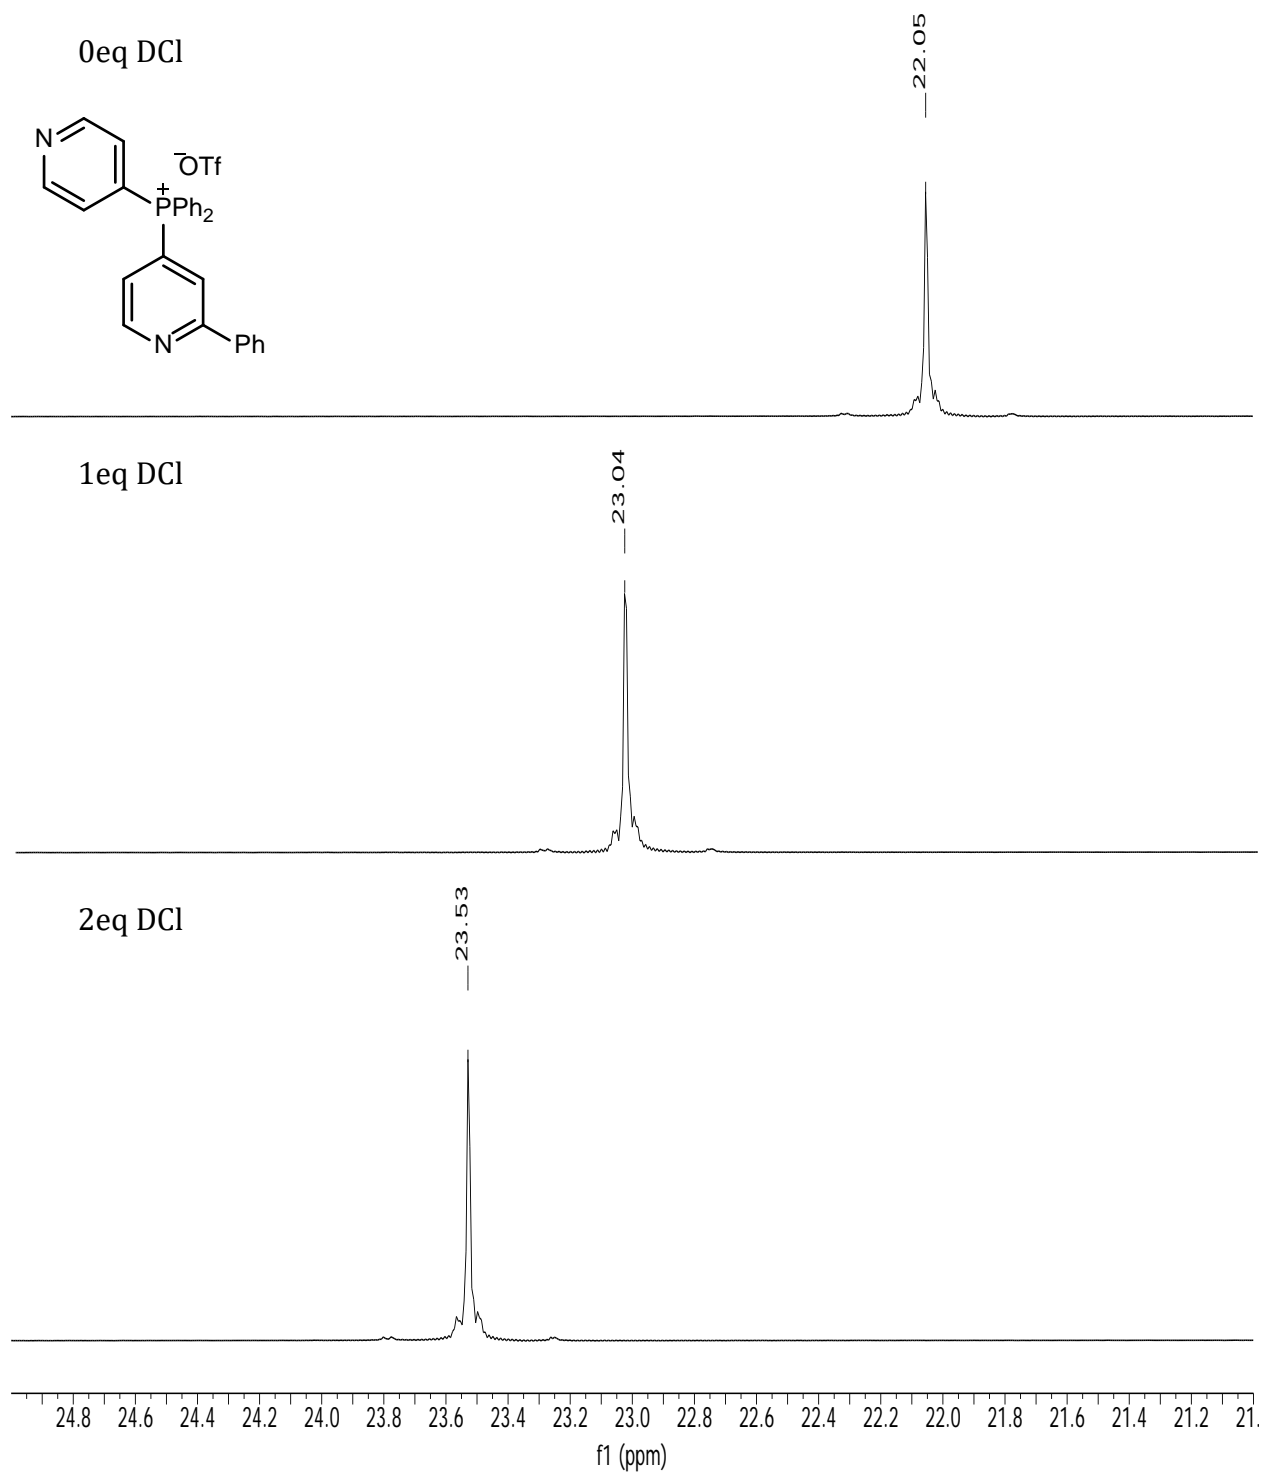

**Figure S18.**  $^{31}\text{P}$  NMR study to determine protonation state of phosphonium salt (**3a**) upon addition of one and two equivalents of DCl at room temperature. DCl was generated *in situ* via reaction of  $\text{CD}_3\text{OD}$  with acyl chloride.

## 8. Aryl Group Substitution Study: Reaction Kinetics

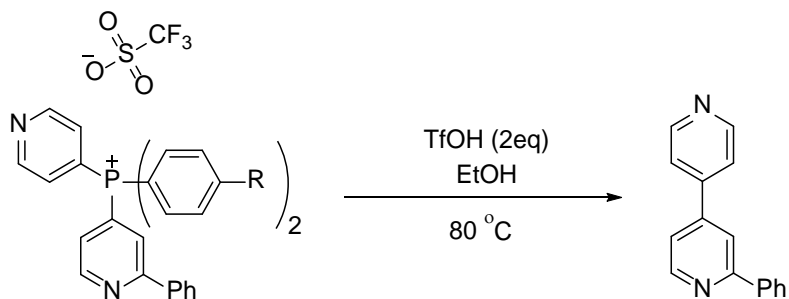

R = H (**3a**), OMe (**3a'**), Me (**3a''**), or Cl (**3a'''**)

### Standard Conditions: Kinetic Profile

| Time | Standard Salt |       | Average: |
|------|---------------|-------|----------|
|      | Run 1         | Run 2 |          |
| 5    | 0.013         | 0.016 | 0.014    |
| 10   | 0.023         | 0.023 | 0.023    |
| 15   | 0.030         | 0.037 | 0.034    |
| 20   | 0.037         | 0.049 | 0.043    |
| 25   | 0.046         | 0.060 | 0.053    |
| 30   | 0.053         | 0.067 | 0.060    |
| 45   | 0.079         | 0.092 | 0.086    |
| 60   | 0.098         | 0.112 | 0.105    |
| 90   | 0.126         | 0.141 | 0.133    |
| 120  | 0.145         | 0.168 | 0.156    |
| 180  | 0.183         | 0.199 | 0.191    |
| 240  | 0.204         | 0.221 | 0.212    |
| 300  | 0.234         | 0.245 | 0.240    |
| 360  | 0.255         | 0.263 | 0.259    |
| 540  | 0.285         | 0.299 | 0.292    |

**Final Yield:** 88.8 89.3  
**Average Rate:** 0.0019

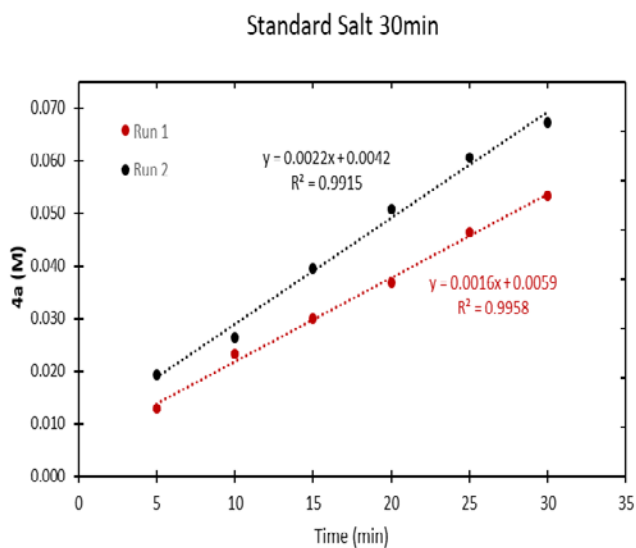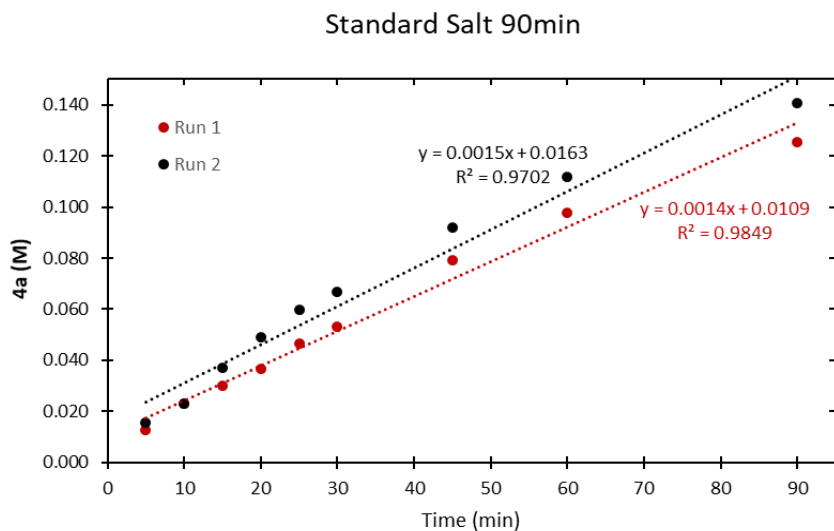

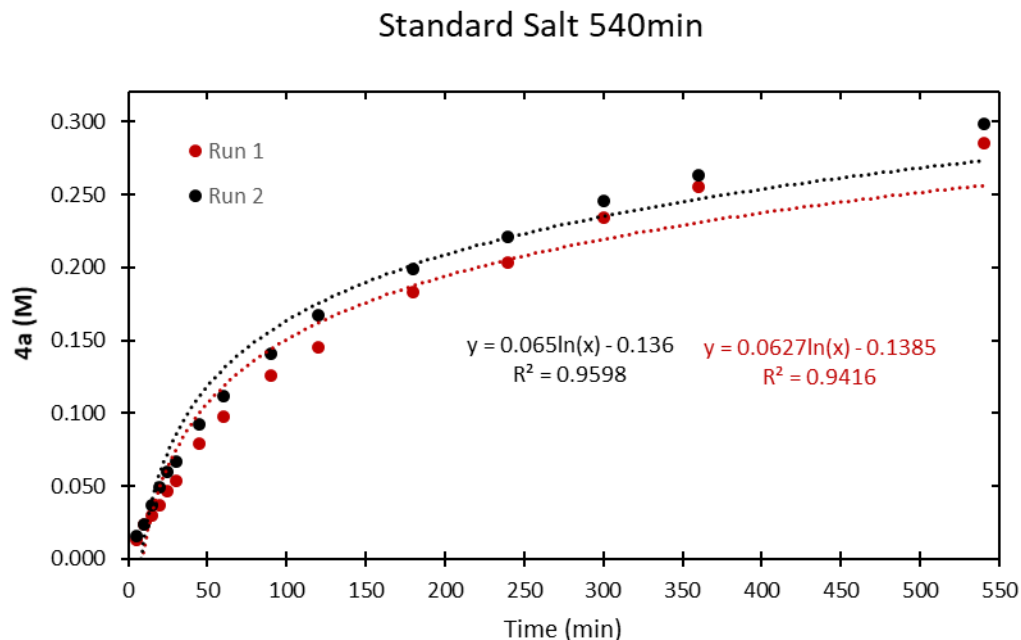

**Figure S19.** Concentration profile of **4a** over time with TfOH on phosphonium salt **3a**. Yields were determined at the given timepoints using  $^1\text{H}$  NMR in  $\text{CD}_3\text{OD}$  with triphenylmethane as the internal standard. Procedure for data collection is detailed below.

The standard reaction was monitored for 9 hours in duplicate and the average was used for comparison of initial rates with phosphonium salt derivatives **3a'** to **3a'''** (**Figure S23**). The linear range for the standard reaction (reaction time of 30 minutes; 15% yield) was chosen for analysis of the initial rate. Each reaction performed for the kinetic analysis was carried to completion to validate method of monitoring product formation instead of starting material consumption; each reaction regardless of phosphonium salt derivative gave a 85-93% yield.

#### Procedure for Aryl Group Substitution Study:

An oven dried 8 mL vial with a septa cap was charged with the phosphonium salt (Characterization of phosphonium salts shown in Preparation of Heteroaryl Phosphonium Salt section (**3a** to **3a'''**)) (0.5 mmol), triphenylmethane (122 mg, 0.5 mmol), and EtOH (1.25 mL). The vial was subjected to three rapid cycles of vacuum / nitrogen backfill and TfOH (132  $\mu\text{L}$ , 1.0 mmol) was added via a syringe. The septa cap was quickly replaced with an unpierced one and the reaction vial placed in an oil bath preheated to 80  $^\circ\text{C}$ . At each timepoint, 75  $\mu\text{L}$  of the reaction mixture was sampled via a syringe and charged to a vial. The vial was then concentrated *in vacuo*. The resulting residue was then dissolved in  $\text{CD}_3\text{OD}$  and  $^1\text{H}$  NMR spectrum was obtained on the sample. The reaction was allowed to progress until the phosphonium salt was fully consumed and the final yield for the reaction was obtained via  $^1\text{H}$  NMR in  $\text{CD}_3\text{OD}$  (18-48 hours). Each reaction profile was performed in duplicate and the average of the two runs used for initial rate analysis (**Figure S23**). This procedure is identical to the protocol for the standard reaction rate investigation.



**Data:**

| Time | p-OMe   |         |         |
|------|---------|---------|---------|
|      | Run 1   | Run 2   | Average |
| 5    | 4.0E-04 | 4.0E-04 | 4.0E-04 |
| 10   | 3.2E-03 | 1.2E-03 | 2.2E-03 |
| 15   | 4.8E-03 | 3.2E-03 | 4.0E-03 |
| 20   | 6.0E-03 | 4.4E-03 | 5.2E-03 |
| 25   | 7.2E-03 | 6.0E-03 | 6.6E-03 |
| 30   | 9.2E-03 | 7.6E-03 | 8.4E-03 |
| 45   | 1.5E-02 | 1.3E-02 | 1.4E-02 |
| 60   | 2.1E-02 | 1.7E-02 | 1.9E-02 |
| 90   | 3.3E-02 | 2.6E-02 | 3.0E-02 |

Final Yield:           92.0       84.9  
Average Rate:        **0.0003**

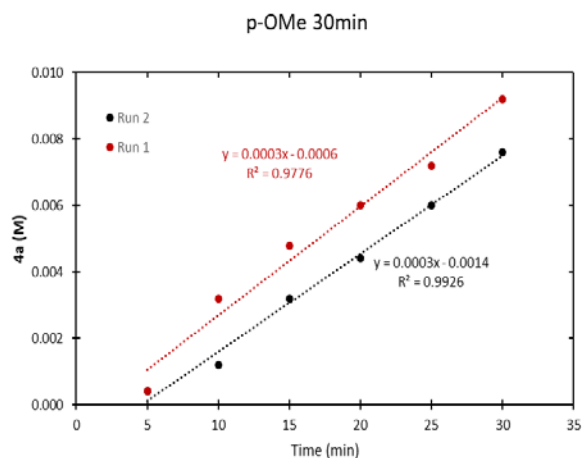

p-OMe 90min

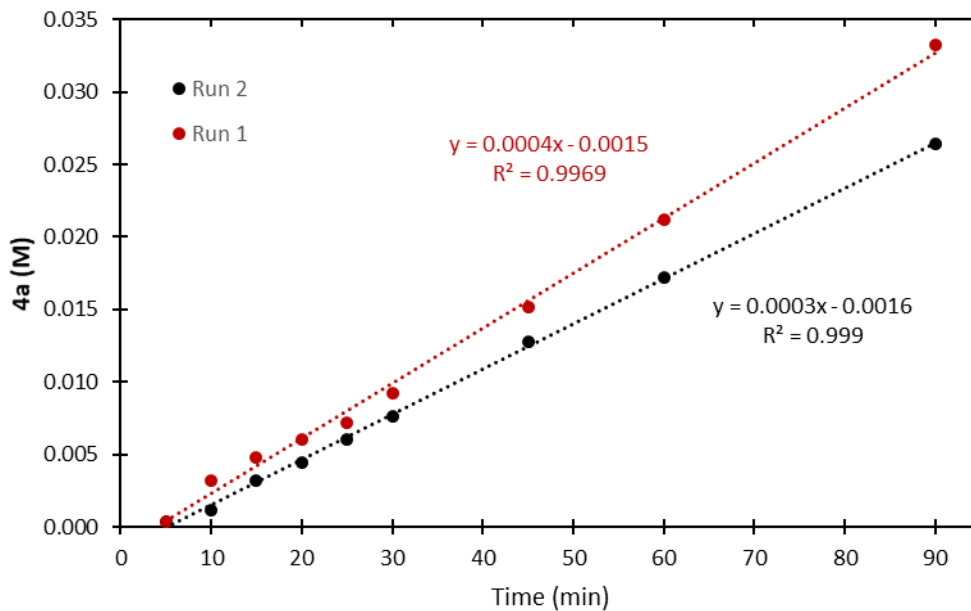

**Figure S20:** Standard reaction conditions run with TfOH with phosphonium salt **3a'** to obtain the initial reaction rate. Study was ran in duplicate. Yields were determined at the given timepoints using  $^1\text{H}$  NMR in  $\text{CD}_3\text{OD}$  with triphenylmethane as the internal standard.

| Time | p-Me  |       | Average |
|------|-------|-------|---------|
|      | Run 1 | Run 2 |         |
| 5    | 0.002 | 0.001 | 0.002   |
| 10   | 0.005 | 0.008 | 0.006   |
| 15   | 0.008 | 0.009 | 0.009   |
| 20   | 0.012 | 0.012 | 0.012   |
| 25   | 0.016 | 0.016 | 0.016   |
| 30   | 0.019 | 0.021 | 0.020   |
| 45   | 0.030 | 0.033 | 0.032   |
| 60   | 0.040 | 0.041 | 0.041   |
| 90   | 0.059 | 0.061 | 0.060   |

Final Yield:            93.4            94  
Average Rate:        **0.0007**

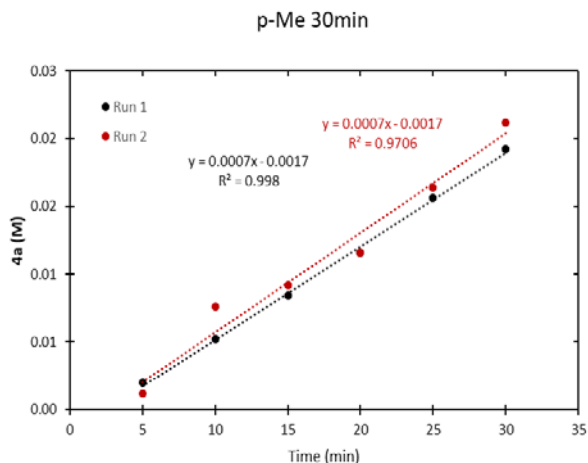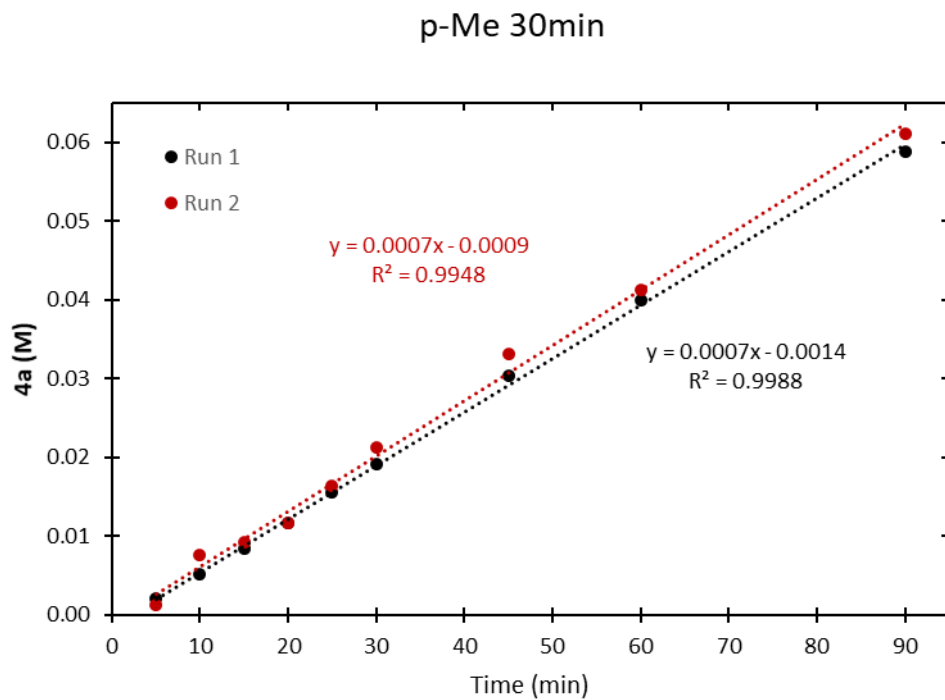

**Figure S21:** Standard reaction conditions run with TfOH with phosphonium salt **3a''** to obtain the initial reaction rate. Study was ran in duplicate. Yields were determined at the given timepoints using  $^1\text{H}$  NMR in  $\text{CD}_3\text{OD}$  with triphenylmethane as the internal standard.

| Time | p-Cl  |       | Average |
|------|-------|-------|---------|
|      | Run 1 | Run 2 |         |
| 5    | 0.054 | 0.063 | 0.058   |
| 10   | 0.088 | 0.094 | 0.091   |
| 15   | 0.103 | 0.116 | 0.109   |
| 20   | 0.124 | 0.134 | 0.129   |
| 25   | 0.136 | 0.144 | 0.140   |
| 30   | 0.151 | 0.152 | 0.152   |
| 45   | 0.169 | 0.174 | 0.171   |
| 60   | 0.186 | 0.191 | 0.188   |
| 90   | 0.209 | 0.213 | 0.211   |

Final Yield: 89.5 89.2  
Average Rate: 0.0036

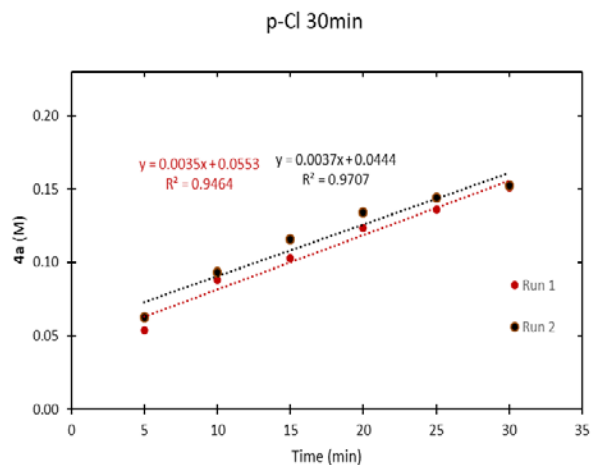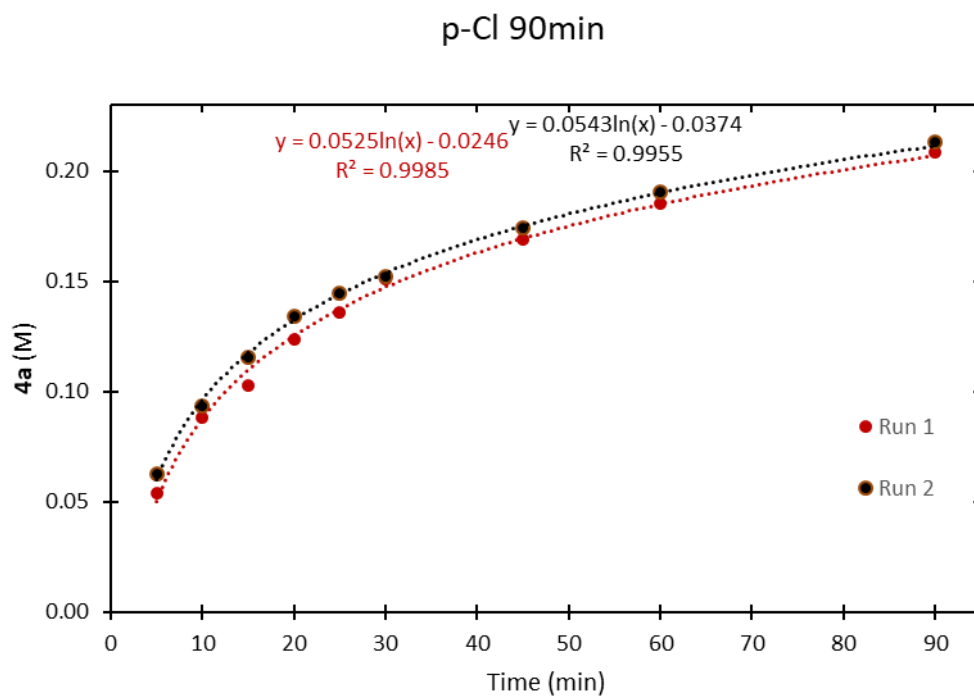

**Figure S22:** Standard reaction conditions run with TfOH with phosphonium salt **3a'''** to obtain the initial reaction rate. Study was ran in duplicate. Yields were determined at the given timepoints using  $^1\text{H}$  NMR in  $\text{CD}_3\text{OD}$  with triphenylmethane as the internal standard.

| Conc. of 4a (Average of 2 Runs) |       |       |       |          |
|---------------------------------|-------|-------|-------|----------|
| Time (min)                      | -Cl   | -H    | -Me   | -OMe     |
| 5                               | 0.058 | 0.014 | 0.002 | 4.00E-04 |
| 10                              | 0.091 | 0.023 | 0.006 | 2.20E-03 |
| 15                              | 0.109 | 0.034 | 0.009 | 4.00E-03 |
| 20                              | 0.129 | 0.043 | 0.012 | 5.20E-03 |
| 25                              | 0.140 | 0.053 | 0.016 | 6.60E-03 |
| 30                              | 0.152 | 0.060 | 0.020 | 8.40E-03 |
| 45                              | 0.171 | 0.086 | 0.032 | 1.40E-02 |
| 60                              | 0.188 | 0.105 | 0.041 | 1.92E-02 |
| 90                              | 0.211 | 0.133 | 0.060 | 2.98E-02 |

EtOH TfOH 30min (Average)

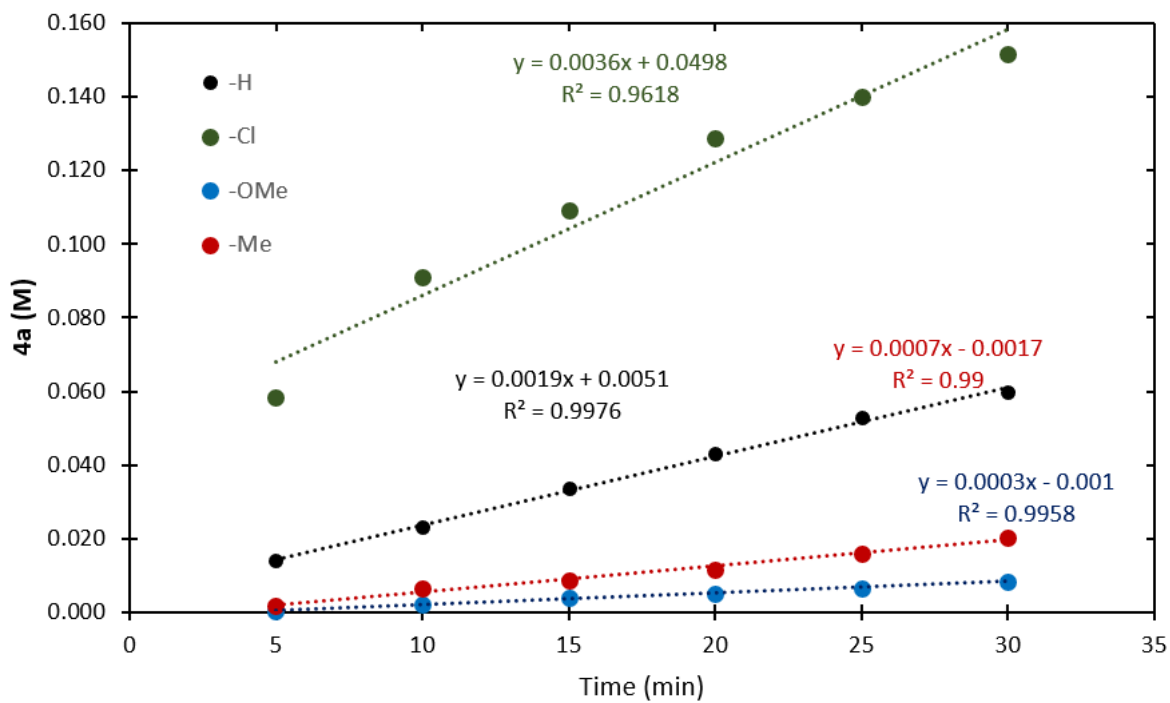

### EtOH TfOH 90min (Average)

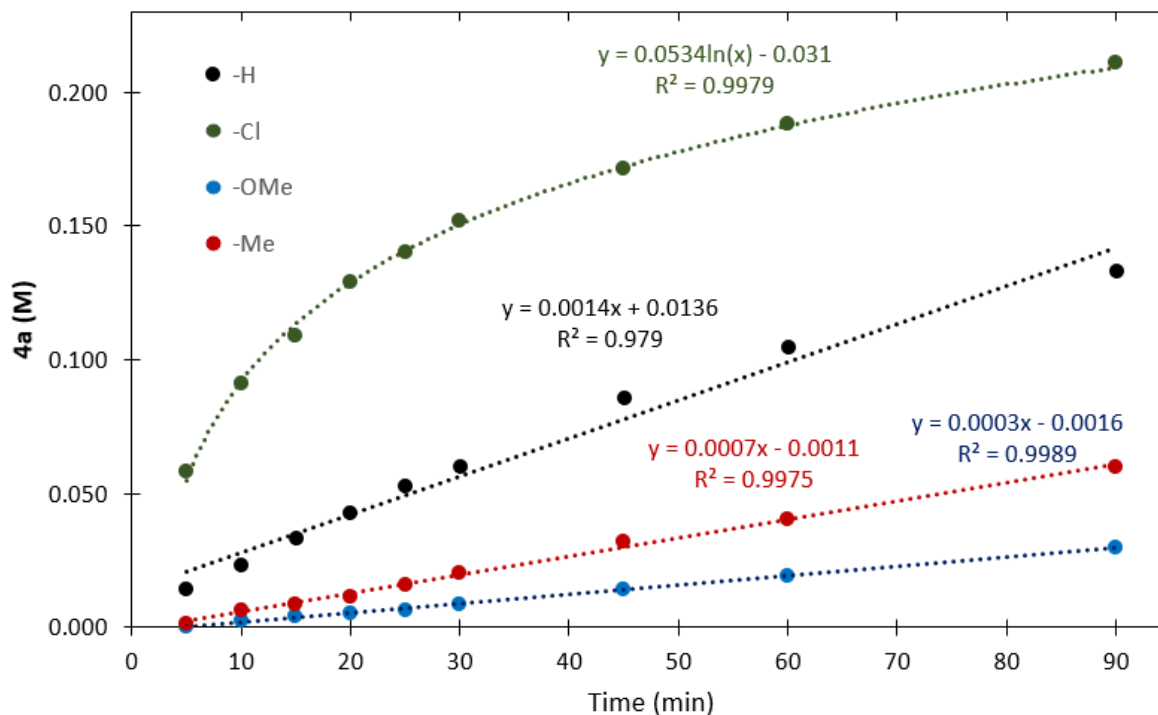

**Figure S23:** Average reaction progression over 30 min and 90 min for phosphonium salt **3a-3a'''** used to obtain the initial reaction rate for relative rate values. Yields were determined at the given timepoints using  $^1\text{H}$  NMR in  $\text{CD}_3\text{OD}$  with triphenylmethane as the internal standard.

**Table S11:** Relative Initial Rates (30 min) ( $\text{rate}_X/\text{rate}_H$ ) of Phosphonium Salts **3a-3a'''** under Standard Reaction Conditions.

| Relative Rate: |      |
|----------------|------|
| -Cl            | 1.89 |
| -H             | 1.00 |
| -Me            | 0.37 |
| -OMe           | 0.16 |

**Analysis:** The investigation into the relative initial rates for the ligand-coupling reaction shows a correlation between reaction rate and electrophilicity at the phosphorus center. The more electron deficient phosphonium salt resulted in a relative rate of 1.89 while more electron rich phosphonium salts resulted in slower relative rates of reaction compared to the standard (-H) phosphonium. Since each phosphonium derivative results in an average 87%+ yield of **4a**, byproduct formation is not dramatically impacting the rate of product formation. This agrees with the hypothesis that the rate determining step is EtOH addition to the phosphorus center to form the phosphorane intermediate ( $[\text{Int-III}\cdot 2\text{H}]^{2+}$ ).

## 9. Alkoxide Investigation

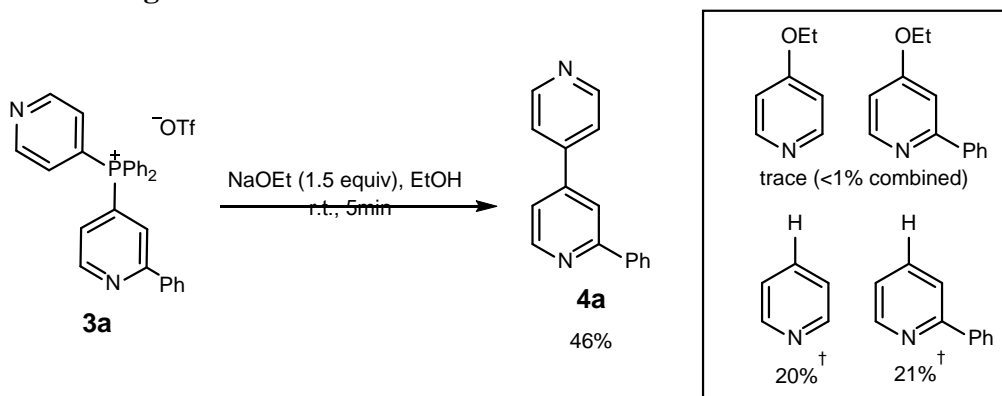

**Figure S24.** Reaction of phosphonium salt **3a** with NaOEt in EtOH at room temperature. Reaction was performed to investigate if ligand coupling occurs at lower temperatures with a stronger nucleophile (alkoxide vs alcohol). A mixture of products was observed, including 46% desired C-C bond formation (**4a**) along with undesired C-H products (41% combined). \*Yield obtained by  $^1\text{H}$  NMR using 1,3,5-trimethoxybenzene as internal standard. †Yield was obtained via GC/FID using 1,3,5-trimethoxybenzene as internal standard (Response Factors: pyridine: 1.46; 2-phenylpyridine: 0.597).

### Procedure for Alkoxide Investigation:

An oven dried 8 mL vial with a septa cap was charged with NaH (60% dispersion in mineral oil, 15 mg, 0.38 mmol) and 1,3,5-trimethoxybenzene (42 mg, 0.25 mmol). The vial was placed under a nitrogen atmosphere, cooled to  $-78\text{ }^\circ\text{C}$ , and then EtOH (0.63 mL) was added. The vial was allowed to warm to  $0\text{ }^\circ\text{C}$  and stirred for 30 minutes. The reaction was then warmed to room temperature and the cap was briefly removed and the phosphonium salt **3a** (142 mg, 0.25 mmol) was added in one portion. The reaction was subjected to three rapid cycles of vacuum/nitrogen backfill and the reaction stirred for 5 minutes at room temperature (phosphonium salt **3a** not detected by LCMS after 5 minutes). The reaction was quenched with  $\text{H}_2\text{O}$ , the aqueous layer was separated and extracted with  $\text{CH}_2\text{Cl}_2$  (3x). The combined organic extracts were washed with a saturated aqueous solution of brine, dried ( $\text{Na}_2\text{SO}_4$ ), filtered and concentrated *in vacuo*. Flash column chromatography (basic alumina: 10% EtOAc in hexanes to 20% EtOAc in hexanes) afforded **4a** as a white crystalline solid (27 mg, 0.12 mmol, 46% yield). (Characterization of **4a** product shown in Ligand-Coupling Reactions to Make Heterobiaryls)

**Analysis:** The investigation into reaction of a stronger nucleophile (alkoxide vs alcohol) with phosphonium salt **3a** gave results consistent with a rate limiting step of phosphorane formation ( $[\text{Int-III}\cdot 2\text{H}]^{2+}$ ) for the standard acidic conditions ligand-coupling reaction. Since the calculated barrier for C-C bond formation is only 30 kcal/mol from  $[\text{Int-III}]$  as long as  $[\text{Int-III}]$  is formed, one would expect to observe C-C bond formation at temperatures lower than  $80\text{ }^\circ\text{C}$ . By using an alkoxide as the nucleophile to form  $[\text{Int-III}]$  we remove this potential barrier from the reaction coordinate (alkoxide attack on the phosphonium center was computed to be barrierless Figure S14). The result of this experiment giving 41% of **4a** when ran at room temperature indicates that in the standard acidic conditions it is the alcohol addition to form  $[\text{Int-III}\cdot 2\text{H}]^{2+}$  that is the rate limiting step and it is this step that requires higher temperatures.

## 10. Challenges and Limitations

### Salt Formation: Challenges/Limitations

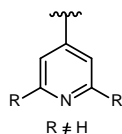

-Unable to form triflyl salt during activation step; No desired phosphonium observed

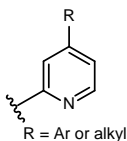

-Ar and HetAr: <25% desired salt yield (<sup>1</sup>H NMR yield using trimethoxybenzene as internal standard)  
-Alkyl: No nucleophilic addition observed (consistent with previously reported literature (92))

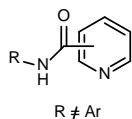

-Undesired side reaction with triflyl activated amide

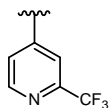

-Unable to form triflyl salt during activation step; No desired phosphonium observed

**Pseudodimer:** Tf-salt exchange can occur resulting in phosphine attacking another molecule of itself. Most often due to a lack of steric/electron bias between the two pyridines. This undesired side reaction can often be eliminated by increasing the temperature for the phosphine addition step. (See 3f for example)

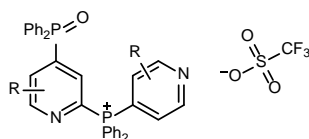

**Pseudodimer**

### Ligand-coupling: Challenges/Limitations

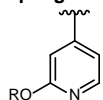

-Slow reaction rates with TFE/TfOH conditions

R = alkyl

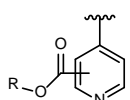

-Slow reaction rate with TFE/TfOH;  
transesterification under EtOH/acid

R ≠ Et

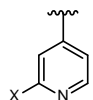

-S<sub>N</sub>Ar with alcohol solvent observed

X = F, Cl, Br

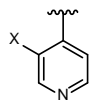

-Dehalogenation observed under ligand-coupling conditions

X = Br or I

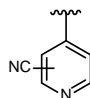

-Slow reaction rate with TFE/TfOH conditions

#### Notes:

-The ligand-coupling reaction was typically able to achieve the desired heterobiaryl product with yields varying based on the pyridine substituents over substitution elsewhere in the molecule.

-Ligand-coupling together 2 deficient pyridines (3 or more EWG directly attached to the pyridines) have been seen to give lower than expected yields for the ligand coupled product.

-An excess of basic nitrogens (5+ between the two coupling partners) results in slower reaction rates.

-Ligand-couplings with pyrimidines resulted in formation undesired C-O bond formation regardless of acid used.

**Figure S25.** Challenges and limitations for phosphonium salt formation and ligand-coupling reaction.

## 11. Additional Examples

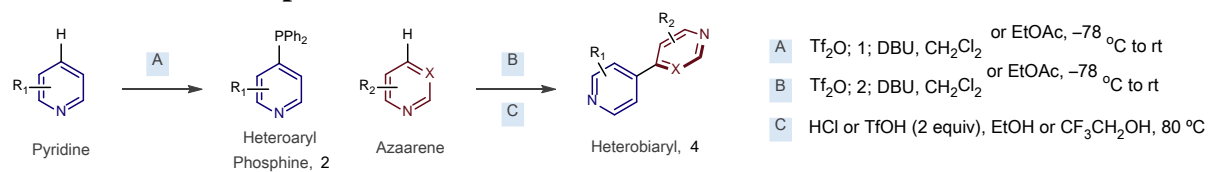

### Additional Scope

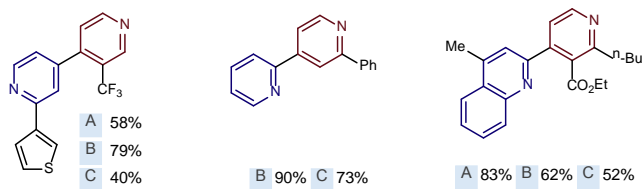

### Bioactive molecules

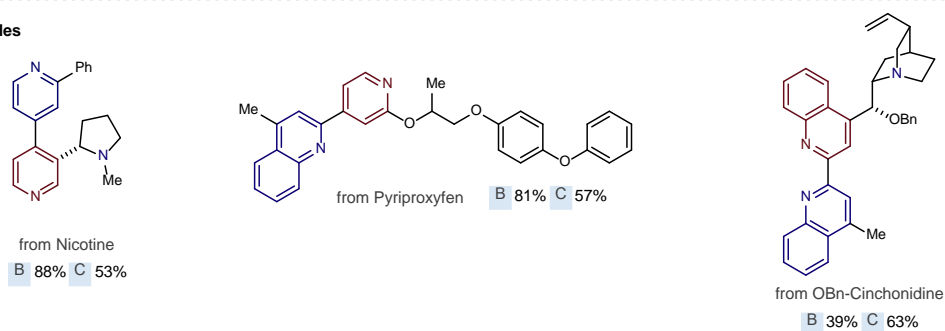

**Figure S26.** Additional examples of phosphorus ligand-coupling.



## 12. Experimental Procedures

### 12a. Preparation of Heterocyclic Phosphonium Salt Precursors

#### Ethyl 2-butylnicotinate

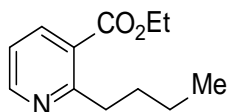

An oven-dried 100 mL round bottom flask was charged with ZnCl<sub>2</sub> (1.91 g, 14.00 mmol) and anhydrous THF (28 mL). The colorless solution was cooled to 0 °C, n-BuLi (2.5 M in hexanes, 5.60 mL, 14.00 mmol) was added dropwise, and the reaction mixture was stirred for 1 hour. The resulting n-butylzinc chloride solution (14.00 mmol) was added dropwise to a 50 mL round bottom flask charged with ethyl 2-bromonicotinate (1.61 g, 7.00 mmol), Pd(PPh<sub>3</sub>)<sub>4</sub> (81 mg, 0.07 mmol), and 7 mL of anhydrous THF. After 3 hours of stirring the reaction mixture at room temperature was quenched with H<sub>2</sub>O (20 mL), organic layer separated, and aqueous layer extracted with CH<sub>2</sub>Cl<sub>2</sub> (3 x 50 mL). The combined organic extracts were dried (MgSO<sub>4</sub>), filtered and concentrated *in vacuo*. The crude material was purified by flash chromatography (silica gel: CH<sub>2</sub>Cl<sub>2</sub> to 5% EtOAc in CH<sub>2</sub>Cl<sub>2</sub>) to provide the title compound as a light yellow oil (680 mg, 3.29 mmol, 47% yield). IR  $\nu_{\max}/\text{cm}^{-1}$  (film): 3047, 2957, 2932, 2871, 1722, 1583, 1567, 1442, 1365, 1274, 1249, 1136, 1095, 1079, 1040, 765; <sup>1</sup>H NMR (400 MHz, CDCl<sub>3</sub>)  $\delta$ : 8.63 (1H, dd, *J* = 4.8, 1.6 Hz), 8.13 (1H, dd, *J* = 1.8, 7.9 Hz), 7.18 (1H, dd, *J* = 4.8, 7.8 Hz), 4.37 (2H, q, *J* = 7.2 Hz), 3.14 (2H, t, *J* = 8.0 Hz), 1.73-1.65 (2H, m), 1.47-1.38 (5H, m), 0.94 (3H, t, *J* = 7.4 Hz); <sup>13</sup>C NMR (100 MHz, CDCl<sub>3</sub>)  $\delta$ : 166.81, 163.42, 151.66, 138.33, 125.74, 120.64, 61.29, 36.84, 32.26, 22.89, 14.21, 13.96; *m/z* HRMS (DART) found [M+H]<sup>+</sup> 208.1349, C<sub>12</sub>H<sub>18</sub>NO<sub>2</sub><sup>+</sup> requires 208.1338.

#### 2-((4-Bromo-3-fluorophenoxy)methyl)pyridine

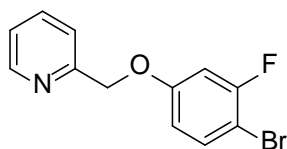

An oven dried 100 mL round bottom was charged with 2-(chloromethyl)pyridine hydrochloride (2.46 g, 15.00 mmol), 4-bromo-3-fluorophenol (2.87 g, 15.00 mmol), K<sub>2</sub>CO<sub>3</sub> (6.22 g, 45.00 mmol) and CH<sub>3</sub>CN (30 mL), and the mixture was refluxed overnight. After cooling to room temperature, the mixture was poured into water (50 mL) and extracted with EtOAc (3 x 50 mL). The combined organic layer was dried over anhydrous MgSO<sub>4</sub>, filtered and concentrated *in vacuo*. The crude material was purified by flash chromatography (silica gel: 16% EtOAc in hexanes to 33% EtOAc in hexanes) to give 2-((4-bromo-3-fluorophenoxy)methyl)pyridine as a white amorphous powder (4.07 g, 14.40 mmol, 96% yield). mp 56–58 °C; IR  $\nu_{\max}/\text{cm}^{-1}$  (film): 3096, 3067, 3024, 2921, 1595, 1587, 1574, 1488, 1479, 1458, 1435, 1416, 1379, 1323, 1301, 1285, 1266, 1239, 1176, 1168, 1154, 1146, 1124, 1061, 1055, 1028, 995, 969, 850, 839, 829, 796, 761, 754, 747; <sup>1</sup>H NMR (400 MHz, CDCl<sub>3</sub>)  $\delta$ : 8.60 (1H, d, *J* = 4.8 Hz), 7.71 (1H, t, *J* = 7.7

Hz), 7.45 (1H, d,  $J = 7.8$  Hz), 7.39 (1H, t,  $J = 8.6$  Hz), 7.23 (1H, dd,  $J = 6.8, 5.6$  Hz), 6.78 (1H, dd,  $J = 10.3, 2.3$  Hz), 6.68 (1H, dd,  $J = 8.9, 2.8$  Hz), 5.16 (2H, s);  $^{13}\text{C}$  NMR (100 MHz,  $\text{CDCl}_3$ )  $\delta$ : 159.40 (d,  $J = 245.4$  Hz), 158.88 (d,  $J = 9.8$  Hz), 156.16, 149.35, 136.85, 133.39 (d,  $J = 1.8$  Hz), 122.86, 121.30, 112.00 (d,  $J = 3.2$  Hz), 103.93 (d,  $J = 25.6$  Hz), 99.85 (d,  $J = 21.1$  Hz), 71.12;  $^{19}\text{F}$  NMR (365 MHz,  $\text{CDCl}_3$ )  $\delta$ : -104.97 (t,  $J = 9.0$  Hz);  $m/z$  HRMS (DART) found  $[\text{M}+\text{H}]^+$  281.9935,  $\text{C}_{12}\text{H}_{10}\text{BrFNO}^+$  requires 281.9930.

### 7-Chloro-4-(3-fluorophenoxy)quinoline

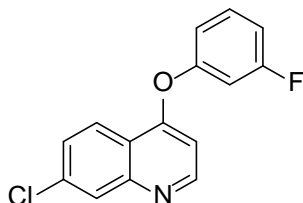

An oven dried 80 mL pressure tube was charged with 4,7-dichloroquinoline (1.19 g, 6.00 mmol), and 3-fluorophenol (1.63 mL, 18.00 mmol). The flask was subjected to three cycles of vacuum/nitrogen backfill. The mixture was heated at 170 °C for 30 minutes, cooled to room temperature and diluted with  $\text{CH}_2\text{Cl}_2$ . The suspension was washed with an aqueous solution of NaOH (6M), the organic layer was separated and washed with  $\text{H}_2\text{O}$  (3 x 25 mL). The organic extract was dried ( $\text{MgSO}_4$ ), filtered and concentrated *in vacuo* to provide the title compound as a pink crystalline solid (1.398 g, 5.10 mmol, 85% yield). mp 78-80 °C; IR  $\nu_{\text{max}}/\text{cm}^{-1}$  (film): 3013, 1612, 1378, 1161, 1135, 876, 819;  $^1\text{H}$  NMR (400 MHz,  $\text{CDCl}_3$ )  $\delta$ : 8.71 (1H, d,  $J = 5.2$  Hz), 8.26 (1H, d,  $J = 8.9$  Hz), 8.10 (1H, d,  $J = 2.0$  Hz), 7.54 (1H, dd,  $J = 11.0, 6.9$  Hz), 7.47-7.41 (1H, m), 7.05-6.98 (2H, m), 6.93 (1H, dt,  $J = 9.4, 4.6$  Hz), 6.61 (1H, d,  $J = 5.2$  Hz);  $^{13}\text{C}$  NMR (100 MHz,  $\text{CDCl}_3$ )  $\delta$ : 163.55 (d,  $J = 248.9$  Hz), 162.32, 155.22 (d,  $J = 10.5$  Hz), 152.26, 150.33, 136.30, 131.19 (d,  $J = 9.5$  Hz), 128.19, 127.32, 123.20, 119.79, 116.55 (d,  $J = 3.4$  Hz), 112.83 (d,  $J = 21.0$  Hz), 108.87 (d,  $J = 24.1$  Hz), 104.81;  $^{19}\text{F}$  NMR (365 MHz,  $\text{CDCl}_3$ )  $\delta$ : -109.43 (q,  $J = 7.1$  Hz);  $m/z$  HRMS (DART) found  $[\text{M}+\text{H}]^+$  274.0426,  $\text{C}_{15}\text{H}_{10}\text{ClFNO}^+$  requires 274.0429.

### (R)-3-(Pyrrolidin-2-ylmethoxy)pyridine

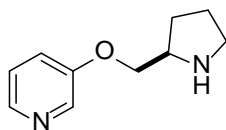

Prepared according to Holladay's report (93) using Boc-D-Prolinol (4.03 g, 20.00 mmol), 3-hydroxypyridine (1.50 g, 30.00 mmol), diethyl azodicarboxylate (4.72 mL, 30.00 mmol), and  $\text{PPh}_3$  (7.87 g, 30.00 mmol), and THF (100 mL). To provide the title compound as an orange oil (2.42 g, 13.60 mmol, 68% yield). IR  $\nu_{\text{max}}/\text{cm}^{-1}$  (film): 3034, 2957, 2871, 1688, 1585, 1485, 1129, 1112, 1013;  $^1\text{H}$  NMR (400 MHz,  $\text{CDCl}_3$ )  $\delta$ : 8.31 (1H, t,  $J = 3.6$  Hz), 8.21 (1H, t,  $J = 3.0$

Hz), 7.20-7.19 (2H, m), 3.99-3.90 (2H, m), 3.60 (1H, m), 3.08-2.96 (3H, m), 2.02-1.92 (1H, m), 1.90-1.75 (2H, m), 1.63-1.54 (1H, m);  $^{13}\text{C}$  NMR (100 MHz,  $\text{CDCl}_3$ )  $\delta$ : 154.85, 142.23, 138.01, 123.74, 121.07, 70.73, 57.26, 48.31, 27.71, 24.98;  $m/z$  HRMS (DART) found  $[\text{M}+\text{H}]^+$  179.1179,  $\text{C}_{10}\text{H}_{15}\text{N}_2\text{O}^+$  requires 179.1187.

### (R)-3-((1-(3-Fluoro-4-(trifluoromethyl)benzyl)pyrrolidin-2-yl)methoxy)pyridine

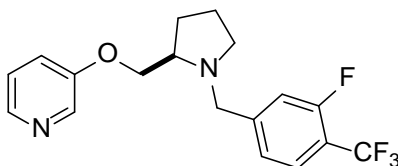

An oven-dried 100 mL round bottom flask was charged with (*R*)-3-(pyrrolidin-2-ylmethoxy)pyridine (1.62 g, 9.10 mmol), 3-fluoro-4-(trifluoromethyl)benzaldehyde (1.40 mL, 10.00 mmol), and sodium triacetoxyhydroborate (3.86 g, 18.20 mmol). The flask was subjected to three cycles of vacuum/nitrogen backfill.  $\text{CH}_2\text{Cl}_2$  (45 mL) was added to the reaction flask along with glacial AcOH (1.05 mL). After 1 hour stirring at room temperature, the reaction was quenched with a saturated solution of  $\text{NH}_4\text{Cl}$  (30 mL) and diluted with  $\text{CH}_2\text{Cl}_2$  and the organic layer was separated. The aqueous layer was basified with  $\text{NaHCO}_3$  and extracted with  $\text{CH}_2\text{Cl}_2$  (2 x 20 mL). The combined organic extracts were dried ( $\text{MgSO}_4$ ), filtered, and concentrated *in vacuo*. The crude material was purified by flash chromatography (silica gel gradient elution: 2% MeOH in  $\text{CH}_2\text{Cl}_2$  to 6% MeOH in  $\text{CH}_2\text{Cl}_2$ ) to provide the title compound as an orange oil (2.50 g, 7.10 mmol, 78% yield). IR  $\nu_{\text{max}}/\text{cm}^{-1}$  (film): 3060, 2966, 2875, 2797, 1629, 1485, 961, 946, 830, 533;  $^1\text{H}$  NMR (400 MHz,  $\text{CDCl}_3$ )  $\delta$ : 8.29 (1H, d,  $J = 2.8$  Hz), 8.21 (1H, dd,  $J = 4.5, 1.2$  Hz), 7.50 (1H, t,  $J = 7.6$  Hz), 7.23-7.13 (4H, m), 4.20 (1H, d,  $J = 14.1$  Hz), 4.01-3.90 (2H, m), 3.57 (1H, d,  $J = 14.2$  Hz), 3.09-3.04 (1H, m), 3.00-2.96 (1H, m), 2.30 (1H, q,  $J = 2.3$  Hz), 2.11-2.02 (1H, m), 1.88-1.70 (3H, m);  $^{13}\text{C}$  NMR (100 MHz,  $\text{CDCl}_3$ )  $\delta$ : 159.83 (dq,  $J = 255.8, 2.4$  Hz), 155.02, 147.52 (d,  $J = 7.2$  Hz), 142.22, 137.98, 126.89-126.83 (2C, m), 122.68 (dq,  $J = 271.7, 0.8$  Hz), 123.79, 123.67 (d,  $J = 3.4$  Hz), 120.97, 116.52 (d,  $J = 20.7$  Hz), 71.92, 62.52, 58.94, 54.80, 28.51, 23.24;  $^{19}\text{F}$  NMR (365 MHz,  $\text{CDCl}_3$ )  $\delta$ : -61.15 (d,  $J = 12.8$  Hz), -115.05 (m);  $m/z$  HRMS (DART) found  $[\text{M}+\text{H}]^+$  355.1454,  $\text{C}_{18}\text{H}_{19}\text{F}_4\text{N}_2\text{O}^+$  requires 355.1428.

### 2-(3-Chloro-5-fluorophenyl)-6-methylpyridine

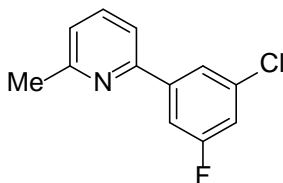

An oven dried round bottom flask was charged with 2-bromo-6-methylpyridine (1.14 mL, 10.00 mmol), (3-chloro-5-fluorophenyl)boronic acid (2.62 g, 15.00 mmol),  $\text{Pd}(\text{OAc})_2$  (34 mg, 0.15 mmol),  $\text{K}_3\text{PO}_4$  (4.25 g, 20.00 mmol), 2-propanol (50 mL), and  $\text{H}_2\text{O}$  (50 mL). The mixture

was heated at 80 °C overnight before being cooled to room temperature and diluted with CH<sub>2</sub>Cl<sub>2</sub>. The organic layer was separated and the aqueous layer was extracted with CH<sub>2</sub>Cl<sub>2</sub> (2x). The combined organic extracts were dried (MgSO<sub>4</sub>), filtered and concentrated *in vacuo*. The crude material was purified by flash column chromatography (silica gel, gradient elution: 0.5% EtOAc in hexanes to 2% EtOAc in hexanes) followed by a second flash column (silica gel, gradient elution: 1.5% EtOAc in hexanes to 2% EtOAc in hexanes) afforded the title compound as a white solid (1.64 g, 7.40 mmol, 74% yield). mp 34-35 °C; IR  $\nu_{\max}/\text{cm}^{-1}$  (film): 3087, 2923, 1607, 1573, 1432, 1388, 1311, 880, 790; <sup>1</sup>H NMR (400 MHz, CDCl<sub>3</sub>)  $\delta$ : 7.79 (1H, s), 7.69-7.60 (2H, m), 7.48 (1H, d, *J* = 7.7 Hz), 7.18-7.08 (2H, m), 2.62 (3H, s); <sup>13</sup>C NMR (100 MHz, CDCl<sub>3</sub>)  $\delta$ : 162.83 (d, *J* = 248.5 Hz), 158.49, 153.66 (d, *J* = 2.6 Hz), 142.74 (d, *J* = 8.4 Hz), 136.87, 135.11 (d, *J* = 10.8 Hz), 122.68 (d, *J* = 3.1 Hz), 122.54, 117.25, 115.94 (d, *J* = 25.1 Hz), 112.12 (d, *J* = 22.9 Hz), 24.43; <sup>19</sup>F NMR (365 MHz, CDCl<sub>3</sub>)  $\delta$ : -110.81 (t, *J* = 9.1 Hz); *m/z* HRMS (DART) found [M+H]<sup>+</sup> 222.0494, C<sub>12</sub>H<sub>10</sub>ClFN<sup>+</sup> requires 222.0480.

## 2-(3-Fluoro-5-(pyridin-3-yl)phenyl)-6-methylpyridine

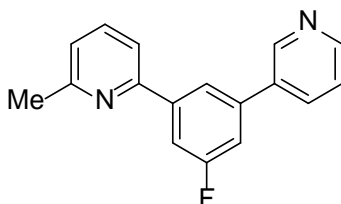

Prepared according to an established procedure (12) using 2-(3-chloro-5-fluorophenyl)-6-methylpyridine (1.64 g, 7.40 mmol), pyridin-3-ylboronic acid (1.0 g, 8.13 mmol), Pd<sub>2</sub>(dba)<sub>3</sub> (68 mg, 0.074 mmol), tricyclohexylphosphane (50 mg, 0.18 mmol), aqueous K<sub>3</sub>PO<sub>4</sub> (1.26 M, 10 mL, 12.60 mmol) and 1,4-dioxanes (20 mL). Flash column chromatography (silica gel, 40% EtOAc in hexanes) afforded the title compound as an off white solid (979 mg, 3.71 mmol, 50% yield). mp 110-111 °C; IR  $\nu_{\max}/\text{cm}^{-1}$  (film): 3039, 2917, 1572, 1447, 1437, 1341, 1174, 869, 791; <sup>1</sup>H NMR (400 MHz, CDCl<sub>3</sub>)  $\delta$ : 8.91 (1H, d, *J* = 2.5 Hz), 8.64 (1H, dd, *J* = 4.8, 1.6 Hz), 8.00 (1H, t, *J* = 1.6 Hz), 7.94 (1H, ddd, *J* = 7.7, 2.5, 1.6 Hz), 7.74 (1H, ddd, *J* = 9.7, 2.4, 1.6 Hz), 7.68 (1H, t, *J* = 7.7 Hz), 7.56 (1H, d, *J* = 7.7 Hz), 7.40 (1H, ddd, *J* = 7.7, 4.8, 0.8 Hz), 7.31 (1H, ddd, *J* = 9.4, 2.5, 1.6 Hz), 7.16 (1H, d, *J* = 7.7 Hz), 2.64 (3H, s); <sup>13</sup>C NMR (100 MHz, CDCl<sub>3</sub>)  $\delta$ : 163.44 (d, *J* = 246.0 Hz) 158.52, 154.80 (d, *J* = 2.7 Hz), 148.96, 148.16, 142.61 (d, *J* = 8.1 Hz), 140.06 (d, *J* = 8.1 Hz), 136.93, 135.35 (d, *J* = 2.2 Hz), 134.25, 123.43, 122.34, 121.26 (d, *J* = 2.5 Hz), 117.49, 113.98 (d, *J* = 22.6 Hz), 113.32 (d, *J* = 22.8 Hz), 24.53; <sup>19</sup>F NMR (365 MHz, CDCl<sub>3</sub>)  $\delta$ : -112.31 (t, *J* = 9.7 Hz); *m/z* HRMS (DART) found [M+H]<sup>+</sup> 265.1136, C<sub>17</sub>H<sub>14</sub>FN<sub>2</sub><sup>+</sup> requires 265.1136.

### (2*R*, 6*S*)-2,6-Dimethyl-4-(quinolin-4-ylmethyl)morpholine

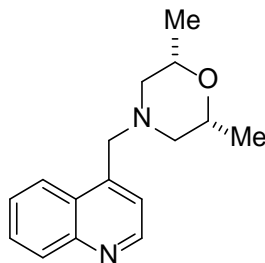

An oven-dried 200 mL round bottom flask was charged with 4-quinolinecarboxaldehyde (2.36 g, 15.00 mmol), *cis*-2,6,-dimethylmorpholine (2.03 mL, 16.50 mmol), and sodium triacetoxyhydroborate (6.36 g, 30.00 mmol). The flask was subjected to three cycles of vacuum/nitrogen backfill. DCM (75 mL) was added to the reaction flask along with glacial AcOH (1.73 mL). After 1.0 hour stirring at room temperature, the reaction was quenched with a saturated aqueous solution of NH<sub>4</sub>Cl (30 mL), diluted with CH<sub>2</sub>Cl<sub>2</sub>, and the organic layer was separated. The aqueous layer was basified with a saturated aqueous solution of NaHCO<sub>3</sub> and extracted with CH<sub>2</sub>Cl<sub>2</sub> (2 x 20 mL). The combined organic extracts were dried (MgSO<sub>4</sub>), filtered and concentrated *in vacuo*. The crude material was purified by flash chromatography (silica gel: 50% EtOAc in hexanes) to provide the title compound as a yellow oil (2.98 g, 11.60 mmol, 77% yield). IR  $\nu_{\max}/\text{cm}^{-1}$  (film): 3035, 2971, 2868, 2813, 2774, 980, 815, 662, 645, 591; <sup>1</sup>H NMR (400 MHz, CDCl<sub>3</sub>)  $\delta$ : 8.84 (1H, d, *J* = 4.3 Hz), 8.23 (1H, d, *J* = 8.4 Hz), 8.11 (1H, d, *J* = 8.4 Hz), 7.70 (1H, m), 7.54 (1H, m), 7.40 (1H, d, *J* = 4.3 Hz), 3.87 (2H, s), 3.69 (2H, m), 2.72 (2H, d, *J* = 10.4 Hz), 1.87 (2H, t, *J* = 10.7 Hz), 1.13 (6H, d, *J* = 6.3 Hz); <sup>13</sup>C NMR (100 MHz, CDCl<sub>3</sub>)  $\delta$ : 150.03, 148.34, 143.60, 129.89, 129.11, 127.62, 126.26, 124.17, 121.37, 71.65 (2C), 59.62, 19.01; *m/z* HRMS (DART) found [M+H]<sup>+</sup> 257.1647, C<sub>16</sub>H<sub>20</sub>N<sub>2</sub>O<sup>+</sup> requires 257.1648.

### Methyl 3-(diphenylphosphaneyl)propanoate (1)

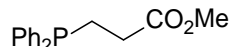

Prepared according to Alonso's report (30). An oven-dried round bottomed flask was charged with diphenylphosphane (17.4 mL, 100 mmol) under a nitrogen atmosphere. Methyl acrylate (9.0 mL, 100 mmol), previously degassed via N<sub>2</sub> sparging, was added dropwise at room temperature over 15 minutes. The reaction was stirred for 16 hours at room temperature before concentrating *in vacuo*. The crude material was purified by flash chromatography (silica gel: 9% EtOAc in hexanes) afforded the title compound as a colorless oil (24.26 g, 89.10 mmol, 89% yield). IR  $\nu_{\max}/\text{cm}^{-1}$  (film): 3053, 2949, 1735, 1481, 1433, 1353, 1221, 1164, 736, 695; <sup>1</sup>H NMR (400 MHz, CDCl<sub>3</sub>)  $\delta$ : 7.47-7.39 (4H, m), 7.38-7.30 (6H, m), 3.65 (3H, s), 2.46-2.31 (4H, m); <sup>13</sup>C NMR (100 MHz, CDCl<sub>3</sub>)  $\delta$ : 173.05 (d, *J* = 15.3 Hz), 137.52 (d, *J* = 13.0 Hz), 132.39 (d, *J* = 19.2 Hz), 128.47, 128.22 (d, *J* = 6.6 Hz), 51.33, 30.21 (d, *J* = 19.8 Hz), 22.69 (d, *J* = 12.2 Hz); <sup>31</sup>P NMR (162 MHz, CDCl<sub>3</sub>)  $\delta$ : -15.76; *m/z* HRMS (DART) found [M+H]<sup>+</sup> 273.1057, C<sub>16</sub>H<sub>18</sub>O<sub>2</sub>P<sup>+</sup> requires 273.1039.

## 12b. Preparation of Heteroaryl Phosphines

### General Procedure A

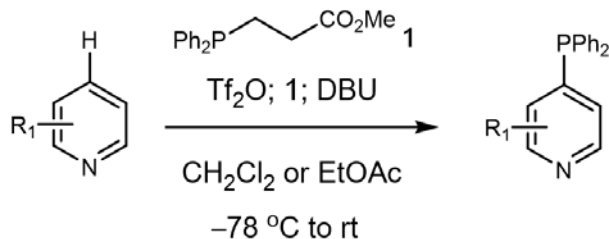

An oven dried 8 mL vial ( $\leq 0.5$  mmol scale) or a round bottom flask ( $> 0.5$  mmol scale) equipped with a stir bar was charged with the heterocycle (1.0 equiv) and placed under a nitrogen atmosphere. CH<sub>2</sub>Cl<sub>2</sub> (0.1 M) was added, the reaction vessel cooled to  $-78$  °C and Tf<sub>2</sub>O (1.0 equiv) was added dropwise over 5 minutes. The reaction was stirred for 30 minutes before the mixture was warmed to  $-50$  °C and then methyl 3-(diphenylphosphanyl)propanoate (1.1 equiv) was added dropwise as a solution (2.0 M in CH<sub>2</sub>Cl<sub>2</sub>). The reaction was subjected to three rapid cycles of vacuum / nitrogen backfill and was stirred for a further 30 minutes at  $-50$  °C. The reaction was cooled to  $-78$  °C and DBU (3.0 equiv) was added dropwise via syringe, the cooling bath was removed and the reaction was allowed to warm to room temperature while stirring for approximately 2 hours. The reaction was diluted with H<sub>2</sub>O and then extracted with CH<sub>2</sub>Cl<sub>2</sub> (3x). The combined organic extracts were dried (MgSO<sub>4</sub>), filtered and concentrated *in vacuo*. The residue was purified by flash column chromatography under the stated conditions to provide the heteroaryl phosphine product.

#### Notes.

- 1) To maximize the yield vigorous stirring is required.
- 2) For long term storage ( $>2$  weeks) it is best to keep the heteroaryl phosphine product in a  $-20$  °C fridge.

#### 4-(Diphenylphosphaneyl)-2-phenylpyridine (2a)

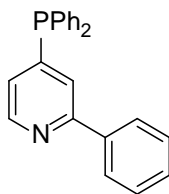

Prepared according to general procedure A using 2-phenylpyridine (2.13 mL, 14.90 mmol), Tf<sub>2</sub>O (2.50 mL, 14.90 mmol), methyl 3-(diphenylphosphaneyl)propanoate (4.44 g, 16.30 mmol), DBU (6.67 mL, 44.70 mmol) and CH<sub>2</sub>Cl<sub>2</sub> (149 mL). Crude (to determine the inherent regioselectivity a separate reaction was ran with 1eq DBU instead of 3eq resulting in a pre-fragmented phosphonium salt. See crude <sup>31</sup>P NMR for structure) regiomeric ratio 13.3:1.0 (4-position:2-position). Flash column chromatography (silica gel, gradient elution: 1% Et<sub>2</sub>O in toluene to 2.5% Et<sub>2</sub>O in toluene) afforded the title compound as a white solid (3.59 g, 10.57 mmol, 71% yield). mp 73-74 °C; IR  $\nu_{\max}/\text{cm}^{-1}$  (film): 3053, 1570, 1434, 1373, 1026, 907, 837, 733, 693; <sup>1</sup>H NMR (400 MHz, CDCl<sub>3</sub>)  $\delta$ : 8.63 (1H, dd, *J* = 5.1, 2.4 Hz), 7.92 (2H, d, *J* = 7.5 Hz), 7.65 (1H, d, *J* = 7.5 Hz) 7.50-7.35 (13H, m), 7.06 (1H, dd, *J* = 6.2, 5.1 Hz); <sup>13</sup>C NMR (100 MHz, CDCl<sub>3</sub>)  $\delta$ : 156.79 (d, *J* = 5.1 Hz), 149.48 (d, *J* = 17.5 Hz), 149.12 (d, *J* = 4.2 Hz), 139.04, 134.93 (d, *J* = 10.1 Hz), 134.09 (d, *J* = 20.4 Hz), 129.44, 128.94, 128.76 (d, *J* = 7.5 Hz), 128.62, 126.86, 125.48 (d, *J* = 13.5 Hz), 124.13 (d, *J* = 18.0 Hz); <sup>31</sup>P (162 MHz, CDCl<sub>3</sub>)  $\delta$ : -6.38; *m/z* HRMS (DART) found [M+H]<sup>+</sup> 340.1271, C<sub>23</sub>H<sub>19</sub>NP<sup>+</sup> requires 340.1250.

#### 2-(4-Bromophenyl)-4-(diphenylphosphaneyl)pyridine (2b)

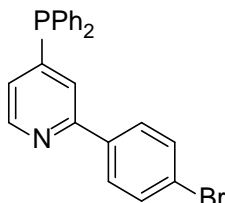

Prepared according to general procedure A using 2-(4-bromophenyl)pyridine (2.20 g, 9.40 mmol), Tf<sub>2</sub>O (1.58 mL, 9.40 mmol), methyl 3-(diphenylphosphaneyl)propanoate (2.82 g, 10.34 mmol), DBU (4.21 mL, 28.20 mmol) and CH<sub>2</sub>Cl<sub>2</sub> (94 mL). Crude (to determine the inherent regioselectivity a separate reaction was ran with 1eq DBU instead of 3eq resulting in a pre-fragmented phosphonium salt. See crude <sup>31</sup>P NMR for structure.) regiomeric ratio 13.9:1.0 (4-position:2-position). Flash column chromatography (silica gel: 1% ether in toluene) afforded the title compound as a white solid (2.40 g, 5.75 mmol, 61% yield). mp 120-123 °C; IR  $\nu_{\max}/\text{cm}^{-1}$  (film): 3056, 1580, 1462, 1431, 1403, 1366, 1070, 826, 741, 694; <sup>1</sup>H NMR (400 MHz, CDCl<sub>3</sub>)  $\delta$ : 8.61 (1H, dd, *J* = 5.0, 2.4 Hz), 7.79 (2H, d, *J* = 8.6 Hz), 7.61 (1H, d, *J* = 7.3 Hz), 7.55 (2H, d, *J* = 8.6 Hz), 7.48-7.36 (10H, m), 7.06 (1H, t, *J* = 5.4 Hz); <sup>13</sup>C NMR (100 MHz, CDCl<sub>3</sub>)  $\delta$ : 155.52 (d, *J* = 5.3 Hz), 149.85 (d, *J* = 18.3 Hz), 149.12 (d, *J* = 4.1 Hz), 137.81, 134.77 (d, *J* = 9.9 Hz), 134.07 (d, *J* = 20.6 Hz), 131.70, 129.49, 128.78 (d, *J* = 7.6 Hz), 128.37, 125.73 (d, *J* = 13.0 Hz),

123.77 (d,  $J = 18.4$  Hz), 123.45;  $^{31}\text{P}$  (162 MHz,  $\text{CDCl}_3$ )  $\delta$ : -6.35;  $m/z$  HRMS (DART) found  $[\text{M}+\text{H}]^+$  418.1046,  $\text{C}_{23}\text{H}_{18}\text{BrNP}^+$  requires 418.1036.

### 5-Chloro-4-(diphenylphosphino)-2-methylpyridine (2c)

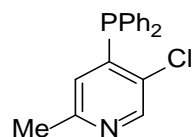

Prepared according to general procedure A using 5-chloro-2-methylpyridine (333 mg, 2.60 mmol),  $\text{Tf}_2\text{O}$  (437  $\mu\text{L}$ , 2.60 mmol), methyl 3-(diphenylphosphino)propanoate (779 mg, 2.86 mmol), DBU (1.17 mL, 7.80 mmol) and  $\text{CH}_2\text{Cl}_2$  (26 mL). Flash chromatography (silica gel: 9% EtOAc in hexanes to 16% EtOAc in hexanes) afforded the title compound as a white amorphous powder (524 mg, 1.69 mmol, 65% yield). mp 112–114  $^\circ\text{C}$ ; IR  $\nu_{\text{max}}/\text{cm}^{-1}$  (film): 3052, 2990, 2921, 1563, 1477, 1441, 1434, 1323, 1127, 749, 744;  $^1\text{H}$  NMR (400 MHz,  $\text{CDCl}_3$ )  $\delta$ : 8.42 (1H, d,  $J = 4.5$  Hz), 7.44–7.37 (6H, m), 7.32–7.28 (4H, m), 6.48 (1H, d,  $J = 3.0$  Hz), 2.38 (s, 3H);  $^{13}\text{C}$  NMR (100 MHz,  $\text{CDCl}_3$ )  $\delta$ : 156.39, 148.01, 147.45 (d,  $J = 19.8$  Hz), 134.15 (d,  $J = 20.7$  Hz), 133.52 (d,  $J = 8.9$  Hz), 133.28 (d,  $J = 22.2$  Hz), 129.58, 128.87 (d,  $J = 7.6$  Hz), 126.91, 23.93;  $^{31}\text{P}$  NMR (162 MHz,  $\text{CDCl}_3$ )  $\delta$ : -11.81;  $m/z$  HRMS (DART) found  $[\text{M}+\text{H}]^+$  312.0710,  $\text{C}_{18}\text{H}_{16}\text{ClNP}^+$  requires 312.0709.

### 3-Chloro-4-(diphenylphosphino)pyridine (2d)

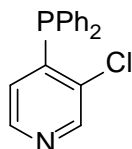

Prepared according to general procedure A using 3-chloropyridine (380  $\mu\text{L}$ , 4.00 mmol),  $\text{Tf}_2\text{O}$  (672  $\mu\text{L}$ , 4.00 mmol), methyl 3-(diphenylphosphino)propanoate (1.20 g, 4.40 mmol), DBU (1.80 mL, 12.00 mmol) and  $\text{CH}_2\text{Cl}_2$  (40 mL). Flash chromatography (silica gel:  $\text{CH}_2\text{Cl}_2$  to 5% EtOAc in  $\text{CH}_2\text{Cl}_2$ ) afforded the title compound as a white powder (1.08 g, 3.64 mmol, 91% yield). mp 66–68  $^\circ\text{C}$ ; IR  $\nu_{\text{max}}/\text{cm}^{-1}$  (film): 3047, 1568, 1478, 1447, 1433, 1392, 1265, 1181, 1119, 1095, 1077, 1029, 836, 744;  $^1\text{H}$  NMR (400 MHz,  $\text{CDCl}_3$ )  $\delta$ : 8.54 (1H, d,  $J = 4.4$  Hz), 8.32 (1H, dd,  $J = 4.9, 0.8$  Hz), 7.46–7.36 (6H, m), 7.34–7.27 (4H, m), 6.64 (1H, ddd,  $J = 5.0, 2.8, 0.5$  Hz);  $^{13}\text{C}$  NMR (100 MHz,  $\text{CDCl}_3$ )  $\delta$ : 148.85, 147.70 (d,  $J = 20.5$  Hz), 147.34, 136.20 (d,  $J = 22.2$  Hz), 134.14 (d,  $J = 20.9$  Hz), 133.29 (d,  $J = 9.1$  Hz), 129.66, 128.91 (d,  $J = 7.8$  Hz), 127.35;  $^{31}\text{P}$  NMR (162 MHz,  $\text{CDCl}_3$ )  $\delta$ : -11.94;  $m/z$  LRMS (ESI + APCI) found  $[\text{M}+\text{H}]^+$  298.1,  $\text{C}_{17}\text{H}_{14}\text{ClNP}^+$  requires 298.1.



## 2-((4-Bromo-3-fluorophenoxy)methyl)-4-(diphenylphosphino)pyridine (2e)

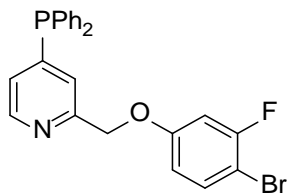

Prepared according to general procedure A using 2-((4-bromo-3-fluorophenoxy)methyl)pyridine (1.41 g, 5.00 mmol), Tf<sub>2</sub>O (840 μL, 5.00 mmol), methyl 3-(diphenylphosphino)propanoate (1.50 g, 5.50 mmol), DBU (2.25 mL, 15.00 mmol) and CH<sub>2</sub>Cl<sub>2</sub> (50 mL). Flash chromatography (silica gel: 16% EtOAc in hexanes) afforded the title compound as a white amorphous powder (1.96 g, 4.20 mmol, 84% yield). mp 125–127 °C; IR  $\nu_{\max}/\text{cm}^{-1}$  (film): 3091, 3068, 2915, 1603, 1580, 1540, 1490, 1476, 1470, 1447, 1435, 1431, 1375, 1294, 1242, 1168, 1149, 1094, 1062, 1027, 991, 949, 887, 853, 831, 804, 747, 731; <sup>1</sup>H NMR (400 MHz, CDCl<sub>3</sub>)  $\delta$ : 8.50–8.48 (1H, m), 7.42–7.27 (11H, m), 7.22–7.20 (1H, m), 7.05–7.02 (1H, m), 6.64 (1H, dd,  $J = 10.2, 2.8$  Hz), 6.56 (1H, ddd,  $J = 8.9, 2.8, 1.0$  Hz), 5.13 (2H, s); <sup>13</sup>C NMR (100 MHz, CDCl<sub>3</sub>)  $\delta$ : 159.36 (d,  $J = 245.5$  Hz), 158.60 (d,  $J = 9.7$  Hz), 155.60 (d,  $J = 4.2$  Hz), 150.34 (d,  $J = 18.4$  Hz), 148.87 (d,  $J = 4.3$  Hz), 134.60 (d,  $J = 9.8$  Hz), 134.12 (d,  $J = 20.4$  Hz), 133.32 (d,  $J = 1.9$  Hz), 129.58, 128.83 (d,  $J = 7.5$  Hz), 126.30 (d,  $J = 14.9$  Hz), 124.69 (d,  $J = 15.9$  Hz), 112.01 (d,  $J = 3.2$  Hz), 104.02 (d,  $J = 25.4$  Hz), 99.87 (d,  $J = 21.2$  Hz), 70.83; <sup>19</sup>F NMR (365 MHz, CDCl<sub>3</sub>)  $\delta$ : -105.03 (t,  $J = 8.2$  Hz); <sup>31</sup>P NMR (162 MHz, CDCl<sub>3</sub>)  $\delta$ : -6.50;  $m/z$  HRMS (DART) found [M+H]<sup>+</sup> 466.0399, C<sub>24</sub>H<sub>19</sub>BrFNOP<sup>+</sup> requires 466.0372.

## 2-(Diphenylphosphino)-4-methylquinoline (2f)

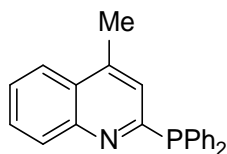

Prepared according to general procedure A using 4-methylquinoline (793 μL, 6.00 mmol), Tf<sub>2</sub>O (1.01 mL, 6.00 mmol), methyl 3-(diphenylphosphino)propanoate (1.80 g, 6.60 mmol), DBU (2.70 mL, 18.00 mmol) and CH<sub>2</sub>Cl<sub>2</sub> (60 mL). Flash chromatography (silica gel: 16% EtOAc in hexanes) afforded the title compound as a white amorphous powder (1.63 g, 4.98 mmol, 83% yield). mp 99–102 °C; IR  $\nu_{\max}/\text{cm}^{-1}$  (film): 3058, 2953, 2926, 2858, 1727, 1576, 1541, 1497, 1479, 1444, 1435, 1431, 761, 751, 739; <sup>1</sup>H NMR (400 MHz, CDCl<sub>3</sub>)  $\delta$ : 8.17 (1H, d,  $J = 8.4$  Hz), 7.96 (1H, d,  $J = 8.3$  Hz), 7.72–7.68 (1H, m), 7.58–7.54 (1H, m), 7.50–7.46 (4H, m), 7.40–7.37 (6H, m), 7.06 (1H, s), 2.58 (3H, d,  $J = 0.6$  Hz); <sup>13</sup>C NMR (100 MHz, CDCl<sub>3</sub>)  $\delta$ : 164.19 (d,  $J = 3.8$  Hz), 148.32 (d,  $J = 15.3$  Hz), 143.42 (d,  $J = 2.8$  Hz), 136.40 (d,  $J = 11.4$  Hz), 134.11 (d,  $J = 19.4$  Hz), 130.24, 129.17, 128.86, 128.48 (d,  $J = 7.0$  Hz), 126.88, 126.53, 124.88 (d,  $J = 14.6$  Hz), 123.60, 18.71; <sup>31</sup>P NMR (162 MHz, CDCl<sub>3</sub>)  $\delta$ : -2.45;  $m/z$  HRMS (DART) found [M+H]<sup>+</sup> 328.1254, C<sub>22</sub>H<sub>19</sub>NP<sup>+</sup> requires 328.1255.

## 2-(Diphenylphosphaneyl)-4-ethoxyquinoline (2g)

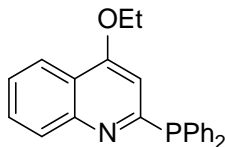

Prepared according to general procedure A, using 4-ethoxyquinoline (500 mg, 3.00 mmol),  $\text{Ff}_2\text{O}$  (500  $\mu\text{L}$ , 3.00 mmol), methyl-3-(diphenylphosphaneyl)propanoate (900 mg, 3.30 mmol), DBU (1.35 mL, 9.00 mmol), and  $\text{CH}_2\text{Cl}_2$  (60 mL). The crude material was purified by flash chromatography (silica gel: 15% EtOAc in hexanes) to provide the title compound as a white crystalline solid (880 mg, 2.46 mmol, 82% yield). mp 114-118  $^\circ\text{C}$ ; IR  $\nu_{\text{max}}/\text{cm}^{-1}$  (film): 3058, 2975, 1482, 1231, 1115, 1018, 696;  $^1\text{H}$  NMR (400 MHz,  $\text{CDCl}_3$ )  $\delta$ : 8.18 (1H, dd,  $J = 8.8, 1.2$  Hz), 8.05 (1H, d,  $J = 8.2$  Hz), 7.70-7.64 (1H, m), 7.51-7.39 (5H, m); 7.38-7.31 (6H, m), 6.49 (1H, d,  $J = 0.6$  Hz), 3.94 (2H, q,  $J = 7.0$  Hz), 1.41 (3H, t,  $J = 7.0$  Hz);  $^{13}\text{C}$  NMR (100 MHz,  $\text{CDCl}_3$ )  $\delta$ : 165.60 (d,  $J = 4.7$  Hz), 160.96 (d,  $J = 3.5$  Hz), 149.60 (d,  $J = 16.9$  Hz), 136.56 (d,  $J = 11.9$  Hz), 134.10 (d,  $J = 19.4$  Hz), 129.73, 129.15, 128.92, 128.49 (d,  $J = 7.0$  Hz), 125.72, 121.72, 120.23, 104.02, 63.69, 14.22  $^{31}\text{P}$  NMR (162 MHz,  $\text{CDCl}_3$ )  $\delta$ : -1.06;  $m/z$  HRMS (DART) found  $[\text{M}+\text{H}]^+$  358.1349  $\text{C}_{23}\text{H}_{21}\text{N}_2\text{OP}^+$  requires 358.1355.

## Ethyl (S)-4-((4-chlorophenyl)(4-(diphenylphosphaneyl)pyridin-2-yl)methoxy)piperidine-1-carboxylate (2h)

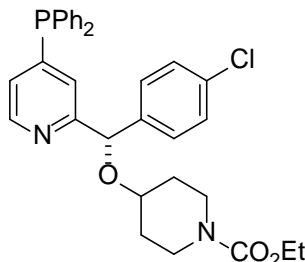

Prepared according to general procedure A using ethyl (S)-4-((4-chlorophenyl)(pyridin-2-yl)methoxy)piperidine-1-carboxylate (1.026 g, 2.74 mmol),  $\text{Ff}_2\text{O}$  (0.46 mL, 2.74 mmol), methyl 3-(diphenylphosphaneyl)propanoate (820 mg, 3.01 mmol), DBU (1.22 mL, 8.21 mmol) and  $\text{CH}_2\text{Cl}_2$  (27.5 mL). Flash column chromatography (silica gel, gradient elution: 45% EtOAc in hexanes to 50% EtOAc in hexanes) afforded the title compound as a tan oil (1.19 g, 2.13 mmol, 78% yield). IR  $\nu_{\text{max}}/\text{cm}^{-1}$  (film): 3052, 2981, 2928, 1692, 1577, 1489, 1434, 1381, 1272, 1227, 1087, 742;  $^1\text{H}$  NMR (400 MHz,  $\text{CDCl}_3$ )  $\delta$ : 8.37 (1H, ddd,  $J = 5.1, 2.3, 0.8$  Hz), 7.41-7.19 (15H, m), 6.95 (1H, m), 5.52 (1H, s), 4.10 (2H, q,  $J = 7.2$  Hz), 3.61-3.45 (3H, m), 3.25-3.06 (2H, m), 1.80-1.67 (1H, m), 1.63-1.38 (3H, m), 1.23 (3H, t,  $J = 7.2$  Hz);  $^{13}\text{C}$  NMR (100 MHz,  $\text{CDCl}_3$ )  $\delta$ : 161.03 (d,  $J = 4.2$  Hz), 155.36, 150.31 (d,  $J = 18.2$  Hz), 148.31 (d,  $J = 4.2$  Hz), 139.82, 134.79 (d,  $J = 10.1$  Hz), 134.76 (d,  $J = 10.1$  Hz), 134.12 (d,  $J = 20.7$  Hz), 134.01 (d,  $J = 20.7$  Hz), 133.31, 129.51 (d,  $J = 2.8$  Hz), 128.72 (d,  $J = 7.6$  Hz), 128.45, 128.14, 125.75 (d,  $J = 15.0$  Hz), 123.83 (d,  $J = 15.6$  Hz), 80.72, 72.23, 61.13, 40.69, 30.80, 30.66, 14.64;  $^{31}\text{P}$  NMR (162 MHz,

$\text{CDCl}_3$ )  $\delta$ : -6.35;  $m/z$  HRMS (DART) found  $[\text{M}+\text{H}]^+$  559.1947,  $\text{C}_{32}\text{H}_{33}\text{ClN}_2\text{O}_3\text{P}^+$  requires 559.1917.

**(2*R*, 6*S*)-4-((2-(Diphenylphosphaneyl)quinolin-4-yl)methyl)-2,6-dimethylmorpholine (2i)**

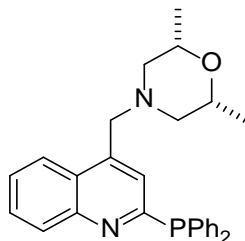

Prepared according to general procedure A, using (2*R*, 6*S*)-2,6-dimethyl-4-(quinolin-4-ylmethyl)morpholine (1.28 g, 5.00 mmol),  $\text{Tf}_2\text{O}$  (840  $\mu\text{L}$ , 5.00 mmol), methyl-3-(diphenylphosphaneyl)propanoate (1.50 g, 5.50 mmol), DBU (2.25 mL, 15.00 mmol), and  $\text{CH}_2\text{Cl}_2$  (50 mL). Crude material was purified by flash chromatography (silica gel: 15% EtOAc in hexanes) to provide the title compound as a white amorphous solid (1.42 g, 3.25 mmol, 65% yield). IR  $\nu_{\text{max}}/\text{cm}^{-1}$  (film): 3054, 2971, 2932, 2868, 2811, 2236, 570, 566, 542, 537, 529;  $^1\text{H}$  NMR (400 MHz,  $\text{CDCl}_3$ )  $\delta$ : 7.95 (1H, d,  $J = 8.5$  Hz), 7.88 (1H, d,  $J = 8.0$  Hz), 7.48 (1H, m), 7.33 (1H, m), 7.30-7.24 (4H, m), 7.20-7.12 (6H, m), 7.07 (1H, s), 3.59 (2H, s), 3.35-3.24 (2H, m), 2.37 (2H, d,  $J = 10.4$  Hz), 1.57 (2H, t,  $J = 10.7$  Hz), 0.90 (6H, d,  $J = 6.3$  Hz);  $^{13}\text{C}$  NMR (100 MHz,  $\text{CDCl}_3$ )  $\delta$ : 164.39 (d,  $J = 3.7$  Hz), 148.59 (d,  $J = 15.1$  Hz), 142.58 (d,  $J = 2.7$  Hz), 136.39 (d,  $J = 11.3$  Hz), 134.05 (d,  $J = 19.5$  Hz), 130.26, 129.12, 128.90, 128.45 (d,  $J = 6.9$  Hz), 126.5, 125.96, 123.94 (d,  $J = 14.5$  Hz), 123.45, 71.46, 59.42, 58.82, 18.94;  $^{31}\text{P}$  NMR (162 MHz,  $\text{CDCl}_3$ )  $\delta$ : -2.22;  $m/z$  HRMS (DART) found  $[\text{M}+\text{H}]^+$  441.2065,  $\text{C}_{28}\text{H}_{30}\text{N}_2\text{OP}^+$  requires 441.2090.

**Additional Examples: Characterization**

**4-(Diphenylphosphaneyl)-2-(thiophen-3-yl)pyridine**

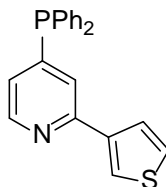

Prepared according to general procedure A using 2-(thiophen-3-yl)pyridine (967 mg, 6.00 mmol),  $\text{Tf}_2\text{O}$  (1.0 mL, 6.00 mmol), methyl 3-(diphenylphosphaneyl)propanoate (1.80 g, 6.60 mmol), DBU (2.7 mL, 18.00 mmol) and  $\text{CH}_2\text{Cl}_2$  (60 mL). Flash column chromatography (silica gel, gradient elution: toluene to 2% Et<sub>2</sub>O in toluene) afforded the title compound as a white solid (1.19 g, 3.44 mmol, 58% yield). mp 102-104  $^\circ\text{C}$ ; IR  $\nu_{\text{max}}/\text{cm}^{-1}$  (film): 3115, 3065, 3014, 1576, 1475, 1435, 1430, 1378, 793, 744, 694;  $^1\text{H}$  NMR (400 MHz,  $\text{CDCl}_3$ )  $\delta$ : 8.55, (1H, dd,  $J = 5.0$ ,

2.4 Hz), 7.82 (1H, dd,  $J = 3.0, 1.0$  Hz), 7.55 (1H, dd,  $J = 5.0, 1.0$  Hz), 7.51 (1H, d,  $J = 7.3$  Hz), 7.47-7.37 (10H, m), 7.34 (1H, dd,  $J = 5.1, 3.0$  Hz), 6.99 (1H, app t,  $J = 5.4$  Hz);  $^{13}\text{C}$  NMR (100 MHz,  $\text{CDCl}_3$ )  $\delta$ : 152.84 (d,  $J = 5.3$  Hz), 149.44 (d,  $J = 17.5$  Hz), 149.03 (d,  $J = 4.3$  Hz), 141.75, 134.87 (d,  $J = 10.1$  Hz), 134.09 (d,  $J = 20.3$  Hz), 129.45, 128.76 (d,  $J = 7.6$  Hz), 126.14 (d,  $J = 15.1$  Hz), 125.17 (d,  $J = 13.7$  Hz), 123.92, 123.73 (2C);  $^{31}\text{P}$  (162 MHz,  $\text{CDCl}_3$ )  $\delta$ : -6.67;  $m/z$  HRMS (DART) found  $[\text{M}+\text{H}]^+$  346.0840,  $\text{C}_{21}\text{H}_{17}\text{NP}^+$  requires 346.0814.

## 12c. Preparation of Heteroaryl Phosponium Salts

### General Procedure B

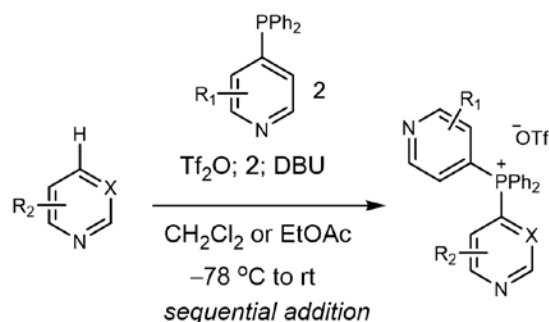

An oven dried 8 mL vial ( $\leq 0.5$  mmol scale) or a round bottom flask ( $> 0.5$  mmol scale) equipped with a stir bar was charged with the heterocycle (1.0 equiv) and placed under a nitrogen atmosphere.  $\text{CH}_2\text{Cl}_2$  (0.1 M) was added, the reaction vessel cooled to  $-78$  °C and  $\text{Tf}_2\text{O}$  (1.0 equiv) was added dropwise over 5 minutes. The reaction was stirred for 30 minutes before the mixture was warmed to  $-50$  °C and then the heteroaryl phosphine (1.1 equiv) was added in one portion as a solid or dropwise as a solution (2.0 M in  $\text{CH}_2\text{Cl}_2$ ). The reaction was subjected to three rapid cycles of vacuum / nitrogen backfill and was stirred for a further 30 minutes at  $-50$  °C. The reaction was cooled to  $-78$  °C and DBU (1.0 equiv) was added dropwise via syringe, the cooling bath was removed and the reaction was allowed to warm to room temperature while stirring (approximately 15-30 minutes). The reaction mixture was diluted with  $\text{CH}_2\text{Cl}_2$  and washed with  $\text{H}_2\text{O}$  (3x). The organic layer was dried ( $\text{MgSO}_4$ ), filtered and concentrated *in vacuo* to approximately 2-10 mL (depending on the scale of the reaction). The concentrated reaction mixture was added dropwise to an excess of chilled  $\text{Et}_2\text{O}$  (0 °C) that was then placed in a  $-20$  °C refrigerator for approximately 2-12 hours. The suspension was filtered on a frit, the solid washed with chilled  $\text{Et}_2\text{O}$  (0 °C) and dried *in vacuo* to provide the pure phosponium salt.

### Notes.

- 1) In a small number of cases, residual  $\text{CH}_2\text{Cl}_2$  can become trapped in the phosponium salt products. In these cases, heating the salts under vacuum (50-100 °C) removed the solvent.
- 2) To maximize the yield vigorous stirring is required.
- 3) Filtration can be done as soon as the precipitate settles.
- 4) In cases where an oil forms instead of a solid it is recommended to decant using  $\text{Et}_2\text{O}$  (0 °C) instead of washing on a frit.

- 5) In general, CH<sub>2</sub>Cl<sub>2</sub> results in the best yields for pyridine salt formation and EtOAc should be used for diazine salt formation for best results.
- 6) Et<sub>2</sub>O typically works best for crashing out the phosphonium salt, however crashing out with 50:50 Et<sub>2</sub>O:hexanes or hexanes have been seen to improve isolation of the phosphonium salt.
- 7) At lower temperatures (−78 °C) on select substrates pseudodimer formation was observed, raising the temperature (−50 °C or −30 °C) generally eliminated this undesired side reaction.

**Diphenyl(2-phenylpyridin-4-yl)(pyridin-4-yl)phosphonium trifluoromethanesulfonate (3a)**

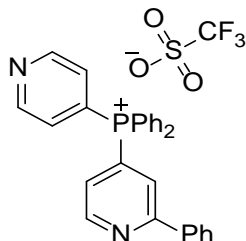

Prepared according to general procedure B using pyridine (119  $\mu$ L, 1.50 mmol), Tf<sub>2</sub>O (250  $\mu$ L, 1.50 mmol), 4-(diphenylphosphaneyl)-2-phenylpyridine (560 mg, 1.65 mmol), DBU (224  $\mu$ L, 1.50 mmol) and CH<sub>2</sub>Cl<sub>2</sub> (15 mL). After the purification procedure (solid was dissolved in approximately 2-10 mL of CH<sub>2</sub>Cl<sub>2</sub> and the solution was again added dropwise to an excess of chilled Et<sub>2</sub>O (0 °C). The mixture was then placed in −20 °C refrigerator for 5 hour. The resulting suspension was filtered on a frit and the solid was washed with chilled Et<sub>2</sub>O (0 °C) and dried *in vacuo* to provide the pure phosphonium salt), the title compound was isolated as a white solid (702 mg, 1.24 mmol, 83% yield). mp 73 °C; IR  $\nu_{\text{max}}/\text{cm}^{-1}$  (film): 3059, 1573, 1440, 1262, 1223, 1150, 1109, 1030; <sup>1</sup>H NMR (400 MHz, CDCl<sub>3</sub>)  $\delta$ : 9.09 (1H, app t,  $J$  = 5.1 Hz), 9.03 (2H, app t,  $J$  = 5.1 Hz), 7.99-7.87 (4H, m) 7.87-7.78 (5H, m), 7.77-7.63 (6H, m), 7.57 (1H, dd,  $J$  = 13.1, 5.1 Hz), 7.48-7.41 (3H, m); <sup>13</sup>C NMR (100 MHz, CDCl<sub>3</sub>)  $\delta$ : 158.99 (d,  $J$  = 10.4 Hz), 151.60 (d,  $J$  = 11.8 Hz), 151.49 (d,  $J$  = 10.3 Hz), 136.49 (d,  $J$  = 1.6 Hz), 136.35 (d,  $J$  = 3.0 Hz), 134.29 (d,  $J$  = 10.7 Hz), 130.93 (d,  $J$  = 13.3 Hz), 130.14, 128.75, 127.40 (d,  $J$  = 84.4 Hz), 126.98 (d,  $J$  = 8.2 Hz), 126.89, 126.39 (d,  $J$  = 84.3 Hz), 125.18 (d,  $J$  = 8.3 Hz), 122.96 (d,  $J$  = 8.9 Hz), 120.38 (q,  $J$  = 321.4 Hz), 113.59 (d,  $J$  = 89.4 Hz); <sup>19</sup>F NMR (365 MHz, CDCl<sub>3</sub>)  $\delta$ : −78.14; <sup>31</sup>P NMR (162 MHz, CDCl<sub>3</sub>)  $\delta$ : 21.76;  $m/z$  HRMS (ESI + APCI) found [M-OTf]<sup>+</sup> 417.1537, C<sub>28</sub>H<sub>22</sub>N<sub>2</sub>P<sup>+</sup> requires 417.1521.

**Bis(4-methoxyphenyl)(2-phenylpyridin-4-yl)(pyridin-4-yl)phosphonium trifluoromethanesulfonate (3a')**

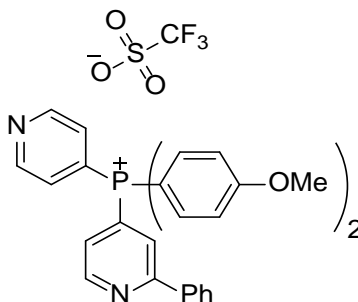

Prepared according to general procedure B using pyridine (24  $\mu\text{L}$ , 0.30 mmol),  $\text{Tf}_2\text{O}$  (50  $\mu\text{L}$ , 0.30 mmol), 4-(bis(4-methoxyphenyl)phosphaneyl)-2-phenylpyridine (prepared from diethyl phosphate and 1-bromo-4-chlorobenzene using Gessner's, Han's, and Bergbreiter's reports followed by general procedure A (93-96). (135 mg, 0.33 mmol), DBU (46  $\mu\text{L}$ , 0.30 mmol) and  $\text{CH}_2\text{Cl}_2$  (3 mL). After the purification procedure (solid was dissolved in approximately 2-10 mL of  $\text{CH}_2\text{Cl}_2$  and the solution was again added dropwise to an excess of chilled  $\text{Et}_2\text{O}$  (0  $^\circ\text{C}$ ). The mixture was then placed in  $-20$   $^\circ\text{C}$  refrigerator for 5 hour. The resulting suspension was filtered on a frit and the solid was washed with chilled  $\text{Et}_2\text{O}$  (0  $^\circ\text{C}$ ) and dried *in vacuo* to provide the pure phosphonium salt), the title compound was isolated as a white crystalline solid (136 mg, 0.22 mmol, 72% yield). mp 73-74  $^\circ\text{C}$ ; IR  $\nu_{\text{max}}/\text{cm}^{-1}$  (film): 3046, 2934, 1592, 1573, 1536, 754, 563, 556;  $^1\text{H}$  NMR (400 MHz,  $\text{CDCl}_3$ )  $\delta$ : 9.10-8.93 (3H, m), 7.95-7.86 (2H, m), 7.79 (1H, d,  $J = 14.1$  Hz), 7.66-7.55 (6H, m), 7.53-7.42 (4H, m), 7.34-7.27 (4H, m), 3.95 (6H, s);  $^{13}\text{C}$  NMR (100 MHz,  $\text{CDCl}_3$ )  $\delta$ : 166.00 (d,  $J = 3.0$  Hz), 159.39 (d,  $J = 10.4$ ), 151.78 (d,  $J = 10.7$  Hz), 151.74 (d,  $J = 10.0$  Hz), 136.88 (d,  $J = 1.7$  Hz), 136.65 (d,  $J = 12.4$  Hz), 130.56, 129.27 (d,  $J = 85.2$  Hz), 129.15, 128.39 (d,  $J = 85.4$  Hz), 127.22, 127.06 (d,  $J = 7.7$  Hz), 125.16 (d,  $J = 8.3$  Hz), 123.09 (d,  $J = 8.7$  Hz), 120.76 (q,  $J = 321.2$  Hz), 117.14 (d,  $J = 14.5$  Hz), 103.51 (d,  $J = 98.2$  Hz), 56.19;  $^{19}\text{F}$  NMR (365 MHz,  $\text{CDCl}_3$ )  $\delta$ : -78.20;  $^{31}\text{P}$  NMR (162 MHz,  $\text{CDCl}_3$ )  $\delta$ : 20.74;  $m/z$  LRMS (ESI + APCI) found  $[\text{M-OTf}]^+$  477.2,  $\text{C}_{30}\text{H}_{26}\text{N}_2\text{O}_2\text{P}^+$  requires 477.2.

(2-phenylpyridin-4-yl)(pyridin-4-yl)di-p-tolylphosphonium  
(3a'')

trifluoromethanesulfonate

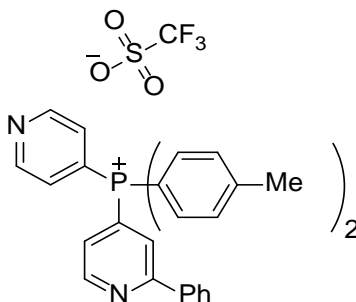

Prepared according to general procedure B using pyridine (60  $\mu\text{L}$ , 0.75 mmol),  $\text{Tf}_2\text{O}$  (126  $\mu\text{L}$ , 0.75 mmol), 4-(di-p-tolylphosphaneyl)-2-phenylpyridine (prepared from di(p-tolyl)phosphine using Alonso's report (30) and general procedure A) (312 mg, 0.83 mmol), DBU (112  $\mu\text{L}$ , 0.75 mmol) and  $\text{CH}_2\text{Cl}_2$  (7.5 mL). After the purification procedure (solid was dissolved in approximately 2-10 mL of  $\text{CH}_2\text{Cl}_2$  and the solution was again added dropwise to an excess of chilled  $\text{Et}_2\text{O}$  (0  $^\circ\text{C}$ ). The mixture was then placed in  $-20$   $^\circ\text{C}$  refrigerator for 5 hour. The resulting suspension was filtered on a frit and the solid was washed with chilled  $\text{Et}_2\text{O}$  (0  $^\circ\text{C}$ ) and dried *in vacuo* to provide the pure phosphonium salt), the title compound was isolated as a brown crystalline solid (375 mg, 0.63 mmol, 84% yield). mp 70-71  $^\circ\text{C}$ ; IR  $\nu_{\text{max}}/\text{cm}^{-1}$  (film): 2936, 2861, 1574, 1444, 547, 543, 538, 528;  $^1\text{H}$  NMR (400 MHz,  $\text{CDCl}_3$ )  $\delta$ : 9.15-8.93 (3H, m), 7.97-7.87 (2H, m), 7.82 (1H, d,  $J = 14.4$  Hz), 7.72-7.44 (14H, m), 2.55 (6H, s);  $^{13}\text{C}$  NMR (100 MHz,  $\text{CDCl}_3$ )  $\delta$ : 159.34 (d,  $J = 10.3$  Hz), 151.83 (d,  $J = 10.8$ ), 151.63 (d,  $J = 9.9$  Hz), 148.52 (d,  $J = 3.3$  Hz), 136.79, 134.46 (d,  $J = 11.2$  Hz), 131.96 (d,  $J = 13.6$  Hz), 130.52, 129.10, 128.31 (d,  $J = 84.5$  Hz), 127.67 (d,  $J = 75.5$  Hz), 127.30, 127.20, 125.33 (d,  $J = 8.4$  Hz), 123.17 (d,  $J = 8.7$ ), 120.64 (q,  $J = 321.0$  Hz), 110.34 (d,  $J = 92.3$  Hz), 21.92;  $^{19}\text{F}$  NMR (365 MHz,  $\text{CDCl}_3$ )  $\delta$ : -78.29;  $^{31}\text{P}$  NMR (162 MHz,  $\text{CDCl}_3$ )  $\delta$ : 21.61;  $m/z$  LRMS (ESI + APCI) found  $[\text{M-OTf}]^+$  445.2,  $\text{C}_{30}\text{H}_{26}\text{N}_2\text{P}^+$  requires 445.2.

**Bis(4-chlorophenyl)(2-phenylpyridin-4-yl)(pyridin-4-yl)phosphonium trifluoromethanesulfonate (3a'')**

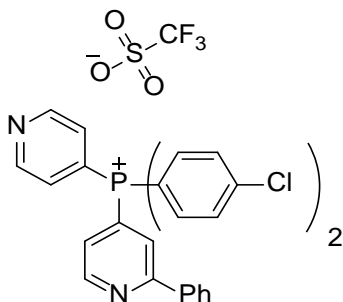

Prepared according to general procedure B using pyridine (84  $\mu$ L, 1.00 mmol), Tf<sub>2</sub>O (168  $\mu$ L, 1.00 mmol), 4-(bis(4-chlorophenyl)phosphaneyl)-2-phenylpyridine (prepared from diethyl phosphate and 1-bromo-4-chlorobenzene using Gessner's, Han's, and Bergbreiter's reports followed by general procedure A (94-96)) (449 mg, 1.10 mmol), NEt<sub>3</sub> (140  $\mu$ L, 1.10 mmol) and CH<sub>2</sub>Cl<sub>2</sub> (10 mL). After the purification procedure (solid was dissolved in approximately 2-10 mL of CH<sub>2</sub>Cl<sub>2</sub> and the solution was again added dropwise to an excess of chilled Et<sub>2</sub>O (0 °C). The mixture was then placed in -20 °C refrigerator for 5 hour. The resulting suspension was filtered on a frit and the solid was washed with chilled Et<sub>2</sub>O (0 °C) and dried *in vacuo* to provide the pure phosphonium salt), the title compound was isolated as a yellow crystalline solid (366 mg, 0.57 mmol, 57% yield). mp 88-90 °C; IR  $\nu_{\text{max}}/\text{cm}^{-1}$  (film): 3046, 2974, 2844, 1592, 1536, 727, 560, 555; <sup>1</sup>H NMR (400 MHz, CDCl<sub>3</sub>)  $\delta$ : 9.21-8.97 (3H, m), 8.00-7.91 (2H, m), 7.87 (1H, d, *J* = 14.3 Hz), 7.84-7.61 (10H, m), 7.57-7.43 (4H, m); <sup>13</sup>C NMR (100 MHz, CDCl<sub>3</sub>)  $\delta$ : 159.71 (d, *J* = 10.4 Hz), 152.04 (d, *J* = 11.0), 152.00 (d, *J* = 10.2 Hz), 144.30 (d, *J* = 3.9 Hz), 136.67 (d, *J* = 1.8 Hz), 136.09 (d, *J* = 11.9 Hz), 132.01 (d, *J* = 12.4 Hz), 131.79 (d, *J* = 14.3 Hz), 130.74, 129.43 (d, *J* = 13.5 Hz), 129.20, 127.09 (d, *J* = 85.0 Hz), 127.04 (d, *J* = 83.2), 125.78, 125.26 (d, *J* = 8.7 Hz), 123.27 (d, *J* = 9.0), 120.58 (q, *J* = 321.0 Hz), 112.22 (d, *J* = 92.7 Hz); <sup>19</sup>F NMR (365 MHz, CDCl<sub>3</sub>)  $\delta$ : -78.40; <sup>31</sup>P NMR (162 MHz, CDCl<sub>3</sub>)  $\delta$ : 21.96; *m/z* LRMS (ESI + APCI) found [M-OTf]<sup>+</sup> 485.1, C<sub>28</sub>H<sub>20</sub>Cl<sub>2</sub>N<sub>2</sub>P<sup>+</sup> requires 485.1.



**(2-(4-Bromophenyl)pyridin-4-yl)(3-chloropyridin-4-yl)diphenylphosphonium trifluoromethanesulfonate (3b)**

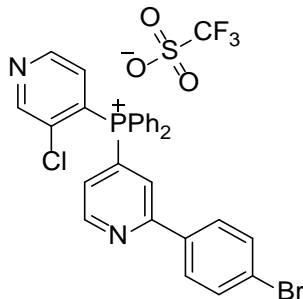

Prepared according to general procedure B using 3-chloropyridine (95  $\mu\text{L}$ , 1.00 mmol),  $\text{Tf}_2\text{O}$  (168  $\mu\text{L}$ , 1.00 mmol), 2-(4-Bromophenyl)-4-(diphenylphosphanyl)pyridine (460 mg, 1.10 mmol), DBU (149  $\mu\text{L}$ , 1.00 mmol) and  $\text{CH}_2\text{Cl}_2$  (10 mL). After the purification procedure, the title compound was isolated as a white solid (556 mg, 0.82 mmol, 82% yield). mp 94-96  $^\circ\text{C}$ ; IR  $\nu_{\text{max}}/\text{cm}^{-1}$  (film): 3062, 1579, 1439, 1258, 1223, 1149, 1107, 1029, 724;  $^1\text{H}$  NMR (400 MHz,  $\text{CDCl}_3$ )  $\delta$ : 9.04 (1H, app t,  $J = 5.4$  Hz), 8.97-8.82 (2H, m), 8.02 (1H, d,  $J = 14.5$  Hz), 7.96-7.85 (4H, m), 7.84-7.72 (8H, m), 7.64-7.52 (3H, m), 7.41 (1H, dd,  $J = 15.1, 5.0$  Hz);  $^{13}\text{C}$  NMR (100 MHz,  $\text{CDCl}_3$ )  $\delta$ : 158.30 (d,  $J = 10.8$  Hz), 151.78 (d,  $J = 11.1$  Hz), 151.59 (d,  $J = 5.1$  Hz), 150.33 (d,  $J = 10.1$  Hz), 136.46 (d,  $J = 3.0$  Hz), 135.67 (d,  $J = 1.7$  Hz), 134.51, 134.27, 132.14, 131.17 (d,  $J = 13.6$  Hz), 130.91 (d,  $J = 8.4$  Hz), 128.93, 127.66 (d,  $J = 85.7$  Hz), 125.57 (d,  $J = 88.3$  Hz), 125.33 (d,  $J = 8.5$  Hz), 125.13, 123.02 (d,  $J = 9.1$  Hz), 120.57 (q,  $J = 321.2$  Hz), 113.39 (d,  $J = 90.4$  Hz);  $^{19}\text{F}$  NMR (365 MHz,  $\text{CDCl}_3$ )  $\delta$ : -78.18;  $^{31}\text{P}$  (162 MHz,  $\text{CDCl}_3$ )  $\delta$ : 22.17;  $m/z$  HRMS (ESI + APCI) found  $[\text{M}-\text{OTf}]^+$  529.0239,  $\text{C}_{28}\text{H}_{20}\text{BrClN}_2\text{P}^+$  requires 529.0236.

**(2-(4-Bromophenyl)pyridin-4-yl)(2-butyl-3-(ethoxycarbonyl)pyridin-4-yl)diphenylphosphonium trifluoromethanesulfonate (3c)**

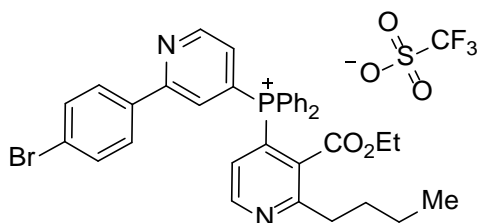

Prepared according to general procedure B (except that after 2-(4-bromophenyl)-4-(diphenylphosphino)pyridine was added, the reaction mixture was stirred for 30 min at -30  $^\circ\text{C}$ ) using ethyl 2-butylnicotinate (300.4 mg, 1.45 mmol),  $\text{Tf}_2\text{O}$  (244  $\mu\text{L}$ , 1.45 mmol), 2-(4-bromophenyl)-4-(diphenylphosphino)pyridine (667 mg, 1.60 mmol), DBU (218  $\mu\text{L}$ , 1.45 mmol) and  $\text{CH}_2\text{Cl}_2$  (14.5 mL). After the purification procedure, the title compound was isolated as a white amorphous powder (831 mg, 1.07 mmol, 74% yield). mp 212-214  $^\circ\text{C}$ ; IR  $\nu_{\text{max}}/\text{cm}^{-1}$  (film): 3045, 2950, 2927, 2870, 1706, 1787, 1578, 1547, 1538, 1463, 1440, 1435, 1404, 1369, 1291, 1275, 1258, 1223, 1177, 1152, 1136, 1105, 1069, 1030, 1013, 1004, 816, 751, 727, 721, 697, 685;  $^1\text{H}$  NMR (400 MHz,  $\text{CDCl}_3$ )  $\delta$ : 9.04-9.00 (2H, m), 7.94-7.84 (5H, m), 7.80-7.69 (8H, m), 7.60-7.54 (3H, m), 7.33 (1H, dd,  $J = 15.7, 5.0$  Hz), 3.51 (2H, q,  $J = 7.2$  Hz), 3.07 (2H, t,  $J = 7.8$  Hz), 1.82-1.74 (2H, m), 1.41 (2H, sext,  $J = 7.4$  Hz), 0.99-0.93 (6H, m);  $^{13}\text{C}$  NMR (100 MHz,

CDCl<sub>3</sub>)  $\delta$ : 166.34 (d,  $J = 3.7$  Hz), 164.12 (d,  $J = 6.3$  Hz), 157.79 (d,  $J = 10.6$  Hz), 153.20 (d,  $J = 11.6$  Hz), 151.37 (d,  $J = 11.0$  Hz), 135.91 (d,  $J = 2.9$  Hz), 135.84 (d,  $J = 1.7$  Hz), 134.53 (d,  $J = 10.5$  Hz), 132.17, 130.65 (d,  $J = 13.3$  Hz), 129.71 (d,  $J = 86.4$  Hz), 128.79, 128.50 (d,  $J = 4.9$  Hz), 127.95 (d,  $J = 9.5$  Hz), 126.79 (d,  $J = 83.3$  Hz), 125.40 (d,  $J = 8.1$  Hz), 125.07, 123.09 (d,  $J = 8.8$  Hz), 120.66 (q,  $J = 319.6$  Hz), 115.84 (d,  $J = 90.5$  Hz), 63.18, 37.27 (d,  $J = 1.5$  Hz), 31.87, 22.62, 13.75, 13.26; <sup>19</sup>F NMR (365 MHz, CDCl<sub>3</sub>)  $\delta$ : -78.19; <sup>31</sup>P NMR (162 MHz, CDCl<sub>3</sub>)  $\delta$ : 27.28;  $m/z$  HRMS (ESI + APCI) found [M-OTf]<sup>+</sup> 623.1460, C<sub>35</sub>H<sub>33</sub>BrN<sub>2</sub>O<sub>2</sub>P<sup>+</sup> requires 623.1463.

**(5-Chloro-2-methylpyridin-4-yl)(3-methoxypyridin-4-yl)diphenylphosphonium trifluoromethanesulfonate (3d)**

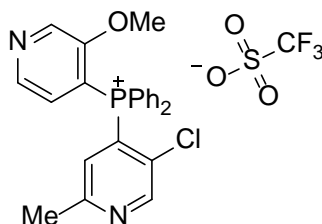

Prepared according to general procedure B (except that after 5-chloro-4-(diphenylphosphino)-2-methylpyridine was added, the reaction mixture was stirred for 30 min at -30 °C) using 3-methoxypyridine (202  $\mu$ L, 2.00 mmol), Tf<sub>2</sub>O (336  $\mu$ L, 2.00 mmol), 5-chloro-4-(diphenylphosphino)-2-methylpyridine (686 mg, 2.20 mmol), DBU (300  $\mu$ L, 2.00 mmol) and CH<sub>2</sub>Cl<sub>2</sub> (20 mL). After the purification procedure, the title compound was isolated as an amorphous white powder (842 mg, 1.48 mmol, 74% yield). mp 182-186 °C; IR  $\nu_{\max}/\text{cm}^{-1}$  (film): 3060, 2951, 1570, 1544, 1483, 1460, 1439, 1411, 1380, 1326, 1300, 1258, 1222, 1140, 1103, 1087, 1072, 1043, 1029, 998, 914, 823, 808, 753, 722, 688, 646; <sup>1</sup>H NMR (400 MHz, CDCl<sub>3</sub>)  $\delta$ : 8.74 (1H, d,  $J = 6.6$  Hz), 8.70 (1H, d,  $J = 6.7$  Hz), 8.62 (1H, t,  $J = 4.6$  Hz), 7.91-7.87 (2H, m), 7.81-7.76 (4H, m), 7.72-7.67 (4H, m), 7.39 (1H, dd,  $J = 15.2, 5.0$  Hz), 7.26 (1H, d,  $J = 15.6$  Hz), 3.72 (3H, s), 2.65 (3H, s); <sup>13</sup>C NMR (100 MHz, CDCl<sub>3</sub>)  $\delta$ : 160.05 (d,  $J = 10.2$  Hz), 155.60, 150.83 (d,  $J = 5.7$  Hz), 144.17 (d,  $J = 11.3$  Hz), 136.64 (d,  $J = 4.5$  Hz), 135.91 (d,  $J = 3.1$  Hz), 134.11 (d,  $J = 11.2$  Hz), 130.81 (d,  $J = 13.7$  Hz), 130.79 (d,  $J = 2.2$  Hz), 129.12 (d,  $J = 8.1$  Hz), 127.68 (d,  $J = 6.8$  Hz), 126.35 (d,  $J = 90.1$  Hz), 120.68 (q,  $J = 319.6$  Hz), 114.06 (d,  $J = 92.0$  Hz), 113.45 (d,  $J = 88.4$  Hz), 57.39 (dd,  $J = 4.6, 5.9$  Hz), 24.19; <sup>19</sup>F NMR (365 MHz, CDCl<sub>3</sub>)  $\delta$ : -78.26; <sup>31</sup>P NMR (162 MHz, CDCl<sub>3</sub>)  $\delta$ : 21.15;  $m/z$  HRMS (ESI + APCI) found [M-OTf]<sup>+</sup> 419.1099, C<sub>24</sub>H<sub>21</sub>ClN<sub>2</sub>OP<sup>+</sup> requires 419.1080.

**(3-Chloro-pyridin-4-yl)(3-fluoropyridin-4-yl)diphenylphosphonium trifluoromethanesulfonate (3e)**

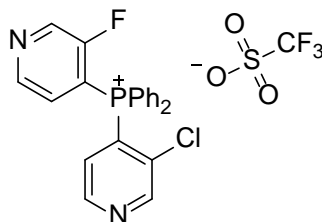

Prepared according to general procedure B (except that after the initial extraction the aqueous layer was extracted an additional 3 times with  $\text{CH}_2\text{Cl}_2$  and then the combined organic was washed once with water prior to concentration) using 3-fluoropyridine (43  $\mu\text{L}$ , 0.50 mmol),  $\text{Tf}_2\text{O}$  (84  $\mu\text{L}$ , 0.50 mmol), 3-chloro-4-(diphenylphosphino)pyridine (164 mg, 0.55 mmol), DBU (75  $\mu\text{L}$ , 0.50 mmol) and  $\text{CH}_2\text{Cl}_2$  (5.0 mL). After the purification procedure (concentrated  $\text{CH}_2\text{Cl}_2$  solution of crude product was added dropwise to an excess of 50%  $\text{Et}_2\text{O}$  in hexanes instead of  $\text{Et}_2\text{O}$ ), the title compound was isolated as a pale yellow solid (148 mg, 0.27 mmol, 54% yield). mp 59-62  $^\circ\text{C}$ ; IR  $\nu_{\text{max}}/\text{cm}^{-1}$  (film): 3085, 3024, 1586, 1546, 1472, 1440, 1403, 1282, 1247, 1225, 1201, 1184, 1154, 1132, 1106, 1030, 996, 749;  $^1\text{H}$  NMR (400 MHz,  $\text{CDCl}_3$ )  $\delta$ : 8.99-8.71 (4H, m), 8.02-7.68 (2H, m), 7.83-7.57 (9H, m), 7.45 (1H, dd,  $J = 15.4, 4.8$  Hz);  $^{13}\text{C}$  NMR (100 MHz,  $\text{CD}_3\text{OD}$ )  $\delta$ : 160.39 (d,  $J = 264.3$  Hz), 153.28 (d,  $J = 5.2$  Hz), 151.07 (d,  $J = 10.4$  Hz), 149.09 (dd,  $J = 10.7, 5.3$  Hz), 141.83 (dd,  $J = 24.0, 4.1$  Hz), 137.73 (d,  $J = 3.2$  Hz), 136.19 (d,  $J = 2.0$  Hz), 135.86 (d,  $J = 11.7$  Hz), 132.22 (d,  $J = 14.1$  Hz), 131.34 (d,  $J = 8.7$  Hz), 129.60 (d,  $J = 3.8$  Hz), 127.07 (d,  $J = 91.3$  Hz), 121.73 (d,  $J = 319.0$  Hz), 116.20 (dd,  $J = 87.5, 13.3$  Hz), 115.76 (d,  $J = 13.3$  Hz);  $^{19}\text{F}$  NMR (365 MHz,  $\text{CD}_3\text{OD}$ )  $\delta$ : -79.79, -111.00;  $^{31}\text{P}$  NMR (162 MHz,  $\text{CDCl}_3$ )  $\delta$ : 19.61 (d,  $J = 4.0$  Hz);  $m/z$  LRMS (ESI + APCI) found  $[\text{M-OTf}]^+$  393.1,  $\text{C}_{22}\text{H}_{16}\text{ClFN}_2\text{OP}^+$  requires 393.1.

**(2-((4-Bromo-3-fluorophenoxy)methyl)pyridin-4-yl)(2-butyl-5-(trifluoromethyl)pyridin-4-yl)diphenylphosphonium trifluoromethanesulfonate and (6-((4-bromo-3-fluorophenoxy)methyl)-4-(diphenylphosphoryl)pyridin-2-yl)(2-((4-bromo-3-fluorophenoxy)methyl)pyridin-4-yl)diphenylphosphonium (3f)**

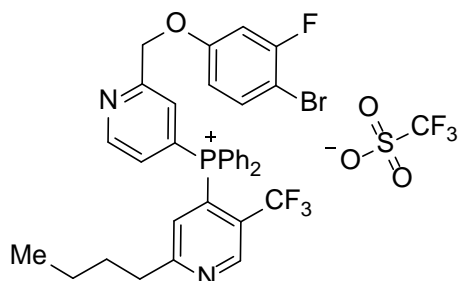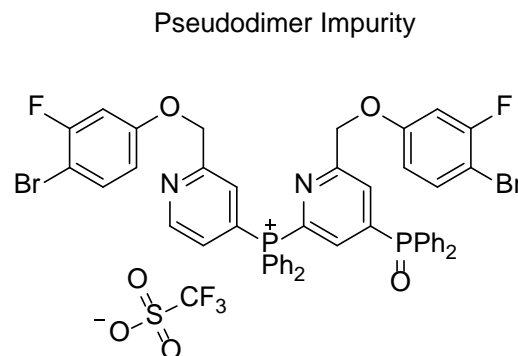

5.6:1

Prepared according to general procedure B using 2-butyl-5-(trifluoromethyl)pyridine (93 mg, 0.46 mmol),  $\text{F}_2\text{O}$  (77  $\mu\text{L}$ , 0.46 mmol), 2-((4-bromo-3-fluorophenoxy)methyl)-4-(diphenylphosphino)pyridine (234 mg, 0.50 mmol), DBU (68  $\mu\text{L}$ , 0.46 mmol) and  $\text{CH}_2\text{Cl}_2$  (4.6 mL). After the purification procedure, the title compounds were isolated as a mixture (crude: 3.7:1; pure: 5.6:1) as a white amorphous powder (204 mg). The mixture was carried forward through the ligand coupling step. IR  $\nu_{\text{max}}/\text{cm}^{-1}$  (film): 3063, 2959, 2932, 2872, 1603, 1578, 1532, 1486, 1439, 1384, 1320, 1259, 1223, 1143, 1120, 1106, 1029, 997, 968, 945, 909, 848, 834, 727; Major,  $^1\text{H}$  NMR (400 MHz,  $\text{CDCl}_3$ )  $\delta$ : 9.16 (1H, d,  $J = 7.3$  Hz), 9.03 (1H, t,  $J = 5.2$  Hz), 7.93-7.90 (2H, m), 7.80-7.62 (10H, m), 7.36 (1H, t,  $J = 8.4$  Hz), 7.21 (1H, d,  $J = 17.4$  Hz), 6.63 (1H, dd,  $J = 10.0, 2.7$  Hz), 6.58 (1H, dd,  $J = 8.7, 2.4$  Hz), 5.33 (2H, s), 2.94 (2H, t,  $J = 7.7$  Hz), 1.66 (2H, qn,  $J = 7.6$  Hz), 1.31 (2H, sext,  $J = 7.5$  Hz), 0.87 (3H, t,  $J = 7.3$  Hz); Major,  $^{13}\text{C}$  NMR (100 MHz,  $\text{CDCl}_3$ )  $\delta$ : 170.37 (d,  $J = 9.8$  Hz), 159.21 (d,  $J = 245.9$  Hz), 158.88 (d,  $J = 10.3$  Hz), 157.97 (d,  $J = 9.8$  Hz), 151.53 (d,  $J = 10.7$  Hz), 150.06 (m), 136.40 (d,  $J = 3.0$  Hz), 134.56 (d,  $J = 7.7$  Hz), 133.52, 130.93 (d,  $J = 13.4$  Hz), 130.24 (d,  $J = 8.5$  Hz), 128.43 (d,  $J = 84.9$  Hz), 126.52 (d,  $J = 8.5$  Hz), 124.46 (d,  $J = 8.8$  Hz), 124.17 (d,  $J = 4.1$  Hz), 123.82 (d,  $J = 79.6$  Hz), 122.48 (qd,  $J = 273.8, 2.3$  Hz), 120.56 (q,  $J = 319.5$  Hz), 114.65 (d,  $J = 89.3$  Hz), 111.81 (d,  $J = 3.0$  Hz), 103.90 (d,  $J = 25.5$  Hz), 100.22 (d,  $J = 21.1$  Hz), 70.00 (d,  $J = 1.5$  Hz), 37.94, 30.25, 22.14, 13.63; Major,  $^{19}\text{F}$  NMR (365 MHz,  $\text{CDCl}_3$ )  $\delta$ : -53.41 (d,  $J = 1.7$  Hz), -78.35, -104.68 (t,  $J = 8.4$  Hz); Major,  $^{31}\text{P}$  NMR (162 MHz,  $\text{CDCl}_3$ )  $\delta$ : 26.97 (d,  $J = 2.4$  Hz);  $m/z$  HRMS (ESI + APCI) found  $[\text{M-OTf}]^+$  667.1166,  $\text{C}_{34}\text{H}_{29}\text{BrF}_4\text{N}_2\text{OP}^+$  requires 667.1137.

**(3-Fluoropyridin-4-yl)(4-methylquinolin-2-yl)diphenylphosphonium trifluoromethanesulfonate (3g)**

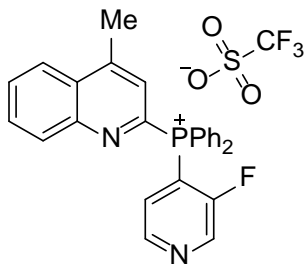

Prepared according to general procedure B, using 3-fluoropyridine (171  $\mu\text{L}$ , 2.00 mmol),  $\text{Tf}_2\text{O}$  (336  $\mu\text{L}$ , 2.00 mmol), 2-(diphenylphosphaneyl)-4-methylquinoline (720 mg, 2.20 mmol), DBU (300  $\mu\text{L}$ , 2.00 mmol), and  $\text{CH}_2\text{Cl}_2$  (20 mL). After purification procedure, the title compound was provided as a light brown crystalline solid (660 mg, 1.16 mmol, 58% yield). mp 65-66  $^\circ\text{C}$  IR  $\nu_{\text{max}}/\text{cm}^{-1}$  (film): 3064, 1545, 1505, 997, 857, 688;  $^1\text{H}$  NMR (400 MHz,  $\text{CDCl}_3$ )  $\delta$ : 8.88-8.83 (2H, m), 8.19 (1H, d,  $J = 8.2$  Hz), 8.14 (1H, d,  $J = 8.2$  Hz), 7.95-7.78 (13H, m), 7.41 (1H, dt,  $J = 14.2, 5.1$  Hz), 2.88 (3H, s);  $^{13}\text{C}$  NMR (100 MHz,  $\text{CDCl}_3$ )  $\delta$ : 158.98 (d,  $J = 265.8$  Hz), 149.37 (d,  $J = 11.4$  Hz), 148.49 (d,  $J = 23.9$  Hz), 148.15 (dd,  $J = 9.9, 6.4$  Hz), 142.67 (d,  $J = 120.2$  Hz), 139.85 (dd,  $J = 22.9, 3.8$  Hz), 136.27 (d,  $J = 31.1$  Hz), 134.67 (d,  $J = 10.6$  Hz), 131.68, 130.92 (d,  $J = 13.4$  Hz), 130.65 (d,  $J = 1.2$  Hz), 130.54, 129.45 (d,  $J = 3.1$  Hz), 128.86 (dd,  $J = 7.0, 1.7$  Hz), 125.22 (d,  $J = 27.1$  Hz), 124.61 (d,  $J = 1.4$  Hz), 120.79 (q,  $J = 321.1$  Hz), 116.43 (dd,  $J = 84.7, 13.9$  Hz), 114.84 (d,  $J = 88.9$  Hz), 19.19 (d,  $J = 1.6$  Hz);  $^{19}\text{F}$  NMR (365 MHz,  $\text{CDCl}_3$ )  $\delta$ : -78.25, -109.74 (d,  $J = 6.6$  Hz);  $^{31}\text{P}$  NMR (162 MHz,  $\text{CDCl}_3$ )  $\delta$ : 11.79;  $m/z$  HRMS (ESI + APCI) found  $[\text{M-OTf}]^+$  423.1454,  $\text{C}_{27}\text{H}_{21}\text{FN}_2\text{P}^+$  requires 423.1426.

**(4-(Ethoxycarbonyl)pyridin-2-yl)(4-ethoxyquinolin-2-yl)diphenylphosphonium trifluoromethanesulfonate (3h)**

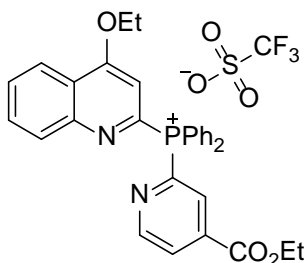

Prepared according to general procedure B, using 4-picolyl acid ethyl ester (150  $\mu\text{L}$ , 1.00 mmol),  $\text{Tf}_2\text{O}$  (168  $\mu\text{L}$ , 1.00 mmol), 2-(diphenylphosphaneyl)-4-ethoxyquinoline (392 mg, 1.10 mmol), DBU (150  $\mu\text{L}$ , 1.00 mmol), and  $\text{CH}_2\text{Cl}_2$  (10 mL). After purification procedure, (concentrated  $\text{CH}_2\text{Cl}_2$  solution of crude product was added dropwise to an excess of 50%  $\text{Et}_2\text{O}$  in hexanes instead of  $\text{Et}_2\text{O}$ ) the title compound was provided as a light brown amorphous solid (400 mg, 0.61 mmol, 61% yield). IR  $\nu_{\text{max}}/\text{cm}^{-1}$  (film): 3064, 2986, 1729, 1476, 942, 851, 557, 537;  $^1\text{H}$  NMR (400 MHz,  $\text{CDCl}_3$ )  $\delta$ : 9.19 (1H, d,  $J = 4.8$  Hz), 8.48 (1H, d,  $J = 5.8$  Hz), 8.35 (1H, d,  $J =$

8.3 Hz), 8.31-8.25 (1H, m), 8.05 (1H, d,  $J = 8.5$  Hz), 7.93-7.66 (12H, m), 7.18 (1H, d,  $J = 6.2$  Hz), 4.40 (2H, q,  $J = 7.1$  Hz), 4.22 (2H, q,  $J = 7.0$  Hz), 1.51 (3H, t,  $J = 7.0$  Hz), 1.35 (3H, t,  $J = 7.1$  Hz);  $^{13}\text{C}$  NMR (100 MHz,  $\text{CDCl}_3$ )  $\delta$ : 163.46 (d,  $J = 14.2$  Hz), 163.15 (d,  $J = 2.7$  Hz), 153.32 (d,  $J = 20.0$  Hz), 149.59 (d,  $J = 25.9$  Hz), 145.87 (d,  $J = 120.4$  Hz), 145.13 (d,  $J = 119.0$  Hz), 139.52 (d,  $J = 10.4$  Hz), 135.75 (d,  $J = 3.1$  Hz), 134.91 (d,  $J = 9.9$  Hz), 131.83, 131.26 (d,  $J = 24.2$  Hz), 130.45 (d,  $J = 13.0$  Hz), 129.31 (d,  $J = 18.0$  Hz), 127.48 (d,  $J = 3.5$  Hz), 122.66, 121.93 (d,  $J = 2.5$  Hz), 120.78 (q,  $J = 321.0$  Hz), 116.87 (d,  $J = 87.9$  Hz), 106.06, 105.78, 65.83, 62.74, 14.04, 13.92;  $^{19}\text{F}$  NMR (365 MHz,  $\text{CDCl}_3$ )  $\delta$ : -78.25;  $^{31}\text{P}$  NMR (162 MHz,  $\text{CDCl}_3$ )  $\delta$ : 9.58;  $m/z$  HRMS (ESI + APCI) found  $[\text{M-OTf}]^+$  507.1919,  $\text{C}_{31}\text{H}_{28}\text{N}_2\text{O}_3\text{P}^+$  requires 507.1832.

**(7-Chloro-4-(3-fluorophenoxy)quinolin-2-yl)(4-methylquinolin-2-yl)diphenylphosphonium trifluoromethanesulfonate (3i)**

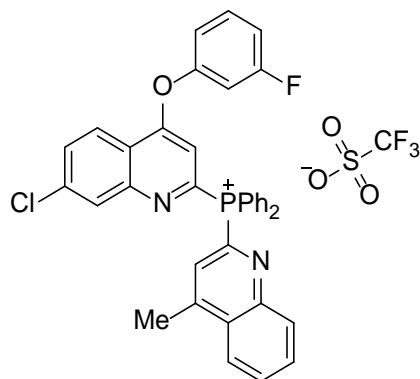

Prepared according to general procedure B, using 7-chloro-4-(3-fluorophenoxy)quinoline (244 mg, 0.89 mmol),  $\text{Tf}_2\text{O}$  (151  $\mu\text{L}$ , 0.89 mmol), 2-(diphenylphosphaneyl)-4-methylquinoline (320 mg, 0.99 mmol), DBU (133  $\mu\text{L}$ , 0.89 mmol), and  $\text{CH}_2\text{Cl}_2$  (9 mL). After purification procedure, the title compound was provided as a brown amorphous solid (330 mg, 0.47 mmol, 53% yield). IR  $\nu_{\text{max}}/\text{cm}^{-1}$  (film): 3067, 1607, 666, 605, 579, 544, 532;  $^1\text{H}$  NMR (400 MHz,  $\text{CDCl}_3$ )  $\delta$ : 8.41 (1H, d,  $J = 9.0$  Hz), 8.16-8.14 (2H, m), 7.92-7.67 (15H, m), 7.54 (1H, d,  $J = 4.6$  Hz), 7.31 (1H, q,  $J = 5.8$  Hz), 7.10 (1H, d,  $J = 5.6$  Hz), 6.98 (1H, dd,  $J = 8.2, 1.8$  Hz), 6.92-6.84 (2H, m), 2.78 (3H, s);  $^{13}\text{C}$  NMR (100 MHz,  $\text{CDCl}_3$ )  $\delta$ : 163.16 (d,  $J = 249.9$  Hz), 162.90 (d,  $J = 13.9$  Hz), 153.49 (d,  $J = 10.4$  Hz), 150.56 (d,  $J = 25.7$  Hz), 148.76 (d,  $J = 10.6$  Hz), 148.15 (d,  $J = 8.6$  Hz), 147.67 (d,  $J = 132.3$  Hz), 143.40 (d,  $J = 114.9$  Hz), 138.65, 135.63 (d,  $J = 3.1$  Hz), 134.76 (d,  $J = 9.8$  Hz), 131.75 (d,  $J = 9.4$  Hz), 131.56, 130.77, 130.66, 130.35 (d,  $J = 12.9$  Hz), 128.87 (d,  $J = 3.0$  Hz), 128.57 (d,  $J = 1.0$  Hz), 128.56, 126.04 (d,  $J = 25.7$  Hz), 124.47 (d,  $J = 1.3$  Hz), 123.78, 120.77 (q,  $J = 321.2$  Hz), 119.87 (d,  $J = 2.5$  Hz), 116.91 (d,  $J = 87.7$  Hz), 117.03 (d,  $J = 3.5$  Hz), 113.69 (d,  $J = 20.9$  Hz), 109.23 (d,  $J = 27.4$  Hz), 108.87 (d,  $J = 24.2$  Hz), 19.14 (d,  $J = 1.5$  Hz);  $^{19}\text{F}$  NMR (365 MHz,  $\text{CDCl}_3$ )  $\delta$ : -78.19, -108.64 (q,  $J = 8.3$  Hz);  $^{31}\text{P}$  NMR (162 MHz,  $\text{CDCl}_3$ )  $\delta$ : 8.06;  $m/z$  HRMS (ESI + APCI) found  $[\text{M-OTf}]^+$  599.1450,  $\text{C}_{38}\text{H}_{27}\text{ClFN}_2\text{OP}^+$  requires 599.1467.

**(4-Methylquinolin-2-yl)diphenyl(2-(propylthio)pyrimidin-4-yl)phosphonium trifluoromethanesulfonate (3j)**

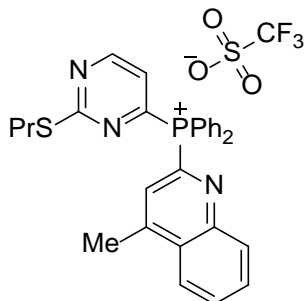

Prepared according to general procedure B (except the stirring time after the addition of the heteroaryl phosphine was 45 minutes instead of 30 minutes) using 2-(propylthio)pyrimidine (154 mg, 1.00 mmol), Tf<sub>2</sub>O (168 μL, 1.00 mmol), 2-(diphenylphosphaneyl)-4-methylquinoline (360 mg, 1.10 mmol), DBU (149, 1.00 mmol) and EtOAc (5 mL). After the purification procedure, the title compound was isolated as a brown solid (433 mg, 0.72 mmol, 72% yield). mp 52-54 °C; IR  $\nu_{\text{max}}/\text{cm}^{-1}$  (film): 3064, 2963, 1576, 1544, 1526, 1439, 1259, 1143, 1029, 727; <sup>1</sup>H NMR (400 MHz, CDCl<sub>3</sub>)  $\delta$ : 8.91 (1H, dd,  $J = 7.6, 4.8$  Hz), 8.21-8.12 (2H, m), 7.95-7.87 (3H, m), 7.87-7.80 (5H, m), 7.80-7.73 (4H, m), 7.70 (1H, dd,  $J = 6.0, 4.8$  Hz), 7.65 (1H, d,  $J = 4.8$  Hz), 2.93 (2H, t,  $J = 7.3$  Hz), 2.83 (3H, s), 1.53 (2H, sext,  $J = 7.3$  Hz), 0.84 (3H, t,  $J = 7.3$  Hz); <sup>13</sup>C NMR (100 MHz, CDCl<sub>3</sub>)  $\delta$ : 174.98 (d,  $J = 18.0$  Hz), 159.91 (d,  $J = 7.3$  Hz), 154.41 (d,  $J = 111.9$  Hz), 148.87 (d,  $J = 10.7$  Hz), 148.51 (d,  $J = 23.4$  Hz), 142.36 (d,  $J = 117.1$  Hz), 136.04 (d,  $J = 3.0$  Hz), 134.99 (d,  $J = 9.9$  Hz), 131.72, 130.77-130.43 (3C, m), 129.12 (d,  $J = 3.0$  Hz), 125.98 (d,  $J = 26.5$  Hz), 124.51 (d,  $J = 1.2$  Hz), 123.11 (d,  $J = 19.6$  Hz), 120.74 (q,  $J = 321.1$  Hz), 115.21 (d,  $J = 87.3$  Hz), 33.05, 22.02, 19.18 (d,  $J = 1.5$  Hz), 13.23; <sup>19</sup>F NMR (365 MHz, CDCl<sub>3</sub>)  $\delta$ : -78.21; <sup>31</sup>P (162 MHz, CDCl<sub>3</sub>)  $\delta$ : 9.49;  $m/z$  HRMS (ESI + APCI) found [M-OTf]<sup>+</sup> 480.1673, C<sub>29</sub>H<sub>27</sub>N<sub>3</sub>PS<sup>+</sup> requires 480.1663.

**(5,6-Dimethylpyrazin-2-yl)(4-ethoxyquinolin-2-yl)diphenylphosphonium trifluoromethanesulfonate (3k)**

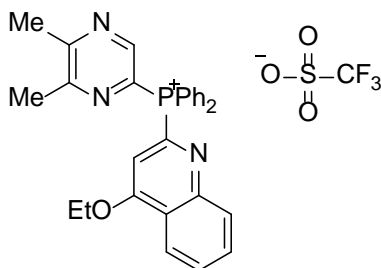

Prepared according to general procedure B using 2,3-dimethylpyrazine (128 μL, 1.20 mmol), Tf<sub>2</sub>O (336 μL, 1.20 mmol), 2-(diphenylphosphino)-4-ethoxyquinoline (472 mg, 1.32 mmol), DBU (180 μL, 1.20 mmol) and CH<sub>2</sub>Cl<sub>2</sub> (12 mL). After the purification procedure (concentrated CH<sub>2</sub>Cl<sub>2</sub> solution of crude product was added dropwise to an excess of hexanes instead of Et<sub>2</sub>O and placed at room temperature overnight), the title compound was isolated as a light brown amorphous powder (663 mg, 1.08 mmol, 90% yield). mp 145-148 °C; IR  $\nu_{\text{max}}/\text{cm}^{-1}$

(film): 3066, 2989, 1571, 1551, 1507, 1438, 1410, 1385, 1354, 1316, 1260, 1222, 1192, 1145, 1108, 1029, 997, 771, 751, 728, 707; <sup>1</sup>H NMR (400 MHz, CDCl<sub>3</sub>) δ: 8.67 (1H, s), 8.35 (1H, d, *J* = 8.4 Hz), 8.04 (1H, d, *J* = 8.5 Hz), 7.90-7.81 (7H, m), 7.77-7.70 (5H, m), 7.26 (1H, d, *J* = 6.1 Hz), 4.25 (2H, q, *J* = 7.0 Hz), 2.73 (3H, s), 2.69 (3H, s), 1.52 (3H, t, *J* = 7.0 Hz); <sup>13</sup>C NMR (100 MHz, CDCl<sub>3</sub>) δ: 163.27 (d, *J* = 14.0 Hz), 159.36 (d, *J* = 3.4 Hz), 156.13 (d, *J* = 15.5 Hz), 149.50 (d, *J* = 25.9 Hz), 147.83 (d, *J* = 23.3 Hz), 144.83 (d, *J* = 118.6 Hz), 136.09 (d, *J* = 83.7 Hz), 135.67 (d, *J* = 3.0 Hz), 134.74 (d, *J* = 9.9 Hz), 131.76, 130.37 (d, *J* = 12.9 Hz), 129.38, 129.16, 122.50, 121.80 (d, *J* = 2.4 Hz), 120.73 (q, *J* = 319.6 Hz), 116.49 (d, *J* = 87.7 Hz), 105.64 (d, *J* = 29.0 Hz), 65.66, 22.76, 22.42, 14.01; <sup>19</sup>F NMR (365 MHz, CDCl<sub>3</sub>) δ: -78.26; <sup>31</sup>P NMR (162 MHz, CDCl<sub>3</sub>) δ: 7.50; *m/z* HRMS (ESI + APCI) found [M-OTf]<sup>+</sup> 464.1931, C<sub>29</sub>H<sub>27</sub>N<sub>3</sub>OP<sup>+</sup> requires 464.1892.

**(2-((*S*)-(4-Chlorophenyl)((1-(ethoxycarbonyl)piperidin-4-yl)oxy)methyl)pyridin-4-yl)(3-(((*R*)-1-(3-fluoro-4-(trifluoromethyl)benzyl)pyrrolidin-2-yl)methoxy)pyridin-4-yl)diphenylphosphonium trifluoromethanesulfonate (3I)**

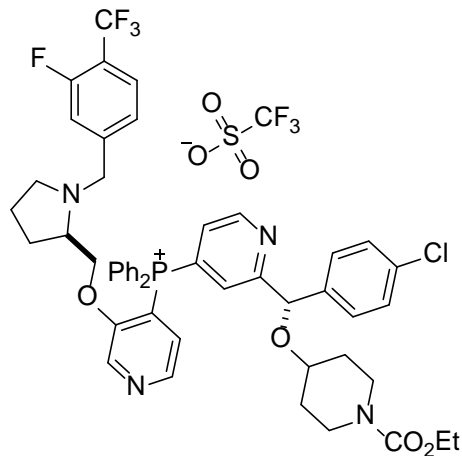

Prepared according to general procedure B, using (*R*)-3-(((1-(3-fluoro-4-(trifluoromethyl)benzyl)pyrrolidin-2-yl)methoxy)pyridine (177 mg, 0.50 mmol), Tf<sub>2</sub>O (85 μL, 0.50 mmol), ethyl (*S*)-4-((4-chlorophenyl)(4-(diphenylphosphaneyl)pyridin-2-yl)methoxy)piperidine-1-carboxylate (307 mg, 0.55 mmol), DBU (75 μL, 0.89 mmol), and CH<sub>2</sub>Cl<sub>2</sub> (5 mL). After the purification procedure (concentrated CH<sub>2</sub>Cl<sub>2</sub> solution of crude product was added dropwise to an excess of 50% Et<sub>2</sub>O in hexanes instead of Et<sub>2</sub>O), the title compound was provided as a brown amorphous solid (370 mg, 0.35 mmol, 70% yield). IR ν<sub>max</sub>/cm<sup>-1</sup> (film): 3061, 2950, 2873, 825, 560, 557, 535, 528; <sup>1</sup>H NMR (500 MHz, CDCl<sub>3</sub>) δ: 8.90 (1H, t, *J* = 5.1 Hz), 8.74 (1H, d, *J* = 6.4 Hz), 8.57 (1H, t, *J* = 4.4 Hz), 7.92-7.45 (13H, m), 7.36-7.27 (4H, m), 7.14-6.96 (3H, m), 5.72 (1H, s), 4.21-4.04 (3H, m), 3.89-3.78 (1H, m), 3.69-3.44 (4H, m), 3.32-3.05 (3H, m), 2.85-2.65 (1H, m), 2.24-1.94 (2H, br), 1.83-1.63 (3H, m), 1.48-1.35 (4H, m), 1.34-1.16 (4H, m); <sup>13</sup>C NMR (125 MHz, CDCl<sub>3</sub>) δ: 164.41 (d, *J* = 9.9 Hz), 159.67 (dq, *J* = 256.0, 2.4 Hz), 155.43, 155.18, 151.30 (d, *J* = 10.5 Hz), 144.50 (d, *J* = 11.4 Hz), 138.69, 136.28-136.10 (m), 134.25-134.02 (m, 2C), 132.57, 131.94 (dd, *J* = 14.6, 4.6 Hz), 131.03 (dd, *J* = 13.4, 7.7 Hz), 128.89, 128.86 (d, *J* = 15.3 Hz), 128.69 (d, *J* = 4.8 Hz), 128.59 (d, *J* = 85.2 Hz), 128.52 (d, *J* = 70.8 Hz), 128.32, 127.31-127.08 (m), 125.56 (d, *J* = 8.6 Hz), 123.15 (d, *J* = 9.4 Hz), 122.51 (dq,



$J = 271.8, 1.9$  Hz), 120.63 (q,  $J = 320.7$  Hz), 114.79 (dd,  $J = 81.0, 28.2$  Hz), 113.05 (d,  $J = 88.0$  Hz), 72.56, 61.37, 57.85, 54.02, 53.99, 40.82, 40.76, 31.46, 30.43, 29.67, 27.89, 22.63, 14.66;  $^{19}\text{F}$  NMR (365 MHz,  $\text{CDCl}_3$ )  $\delta$ : -61.18 (d,  $J = 13.2$  Hz), -78.25, -113.33-115.80 (m);  $^{31}\text{P}$  NMR (162 MHz,  $\text{CDCl}_3$ )  $\delta$ : 21.01;  $m/z$  HRMS (ESI + APCI) found  $[\text{M-OTf}]^+$  911.3094,  $\text{C}_{50}\text{H}_{49}\text{ClF}_4\text{N}_4\text{O}_4\text{P}^+$  requires 911.3116.

**(S)-2-((4-Chlorophenyl)((1-(ethoxycarbonyl)piperidin-4-yl)oxy)methyl)pyridin-4-yl)(3-(3-fluoro-5-(6-methylpyridin-2-yl)phenyl)pyridin-4-yl)diphenylphosphonium trifluoromethanesulfonate (3m)**

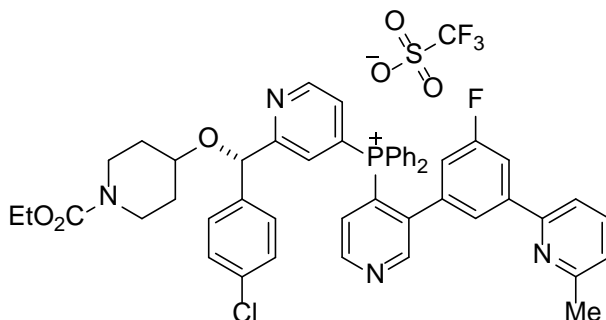

Prepared according to general procedure B using 2-(3-fluoro-5-(pyridin-3-yl)phenyl)-6-methylpyridine (132 mg, 0.50 mmol),  $\text{Ti}_2\text{O}$  (84  $\mu\text{L}$ , 0.50 mmol), ethyl (S)-4-((4-chlorophenyl)(4-(diphenylphosphaneyl)pyridin-2-yl)methoxy)piperidine-1-carboxylate (308 mg, 0.55 mmol), DBU (75  $\mu\text{L}$ , 0.50 mmol) and  $\text{CH}_2\text{Cl}_2$  (5 mL). After the purification procedure, the title compound was isolated as a white solid (305 mg, 0.31 mmol, 63% yield). mp 103-109  $^\circ\text{C}$ ; IR  $\nu_{\text{max}}/\text{cm}^{-1}$  (film): 3063, 2928, 1687, 1438, 1261, 1224, 1149, 1030, 796;  $^1\text{H}$  NMR (400 MHz,  $\text{CDCl}_3$ )  $\delta$ : 9.00 (1H, app t,  $J = 4.7$  Hz), 8.82 (1H, d,  $J = 7.0$  Hz), 8.74 (1H, app t,  $J = 5.3$  Hz), 7.81-7.72 (2H, m), 7.71-7.60 (9H, m), 7.58-7.47 (3H, m), 7.44 (1H, d,  $J = 9.8$  Hz), 7.28 (1H, s), 7.29-7.19 (6H, m), 7.07 (1H, d,  $J = 7.6$  Hz), 7.02 (1H, d,  $J = 7.7$  Hz), 6.46 (1H, d,  $J = 8.3$  Hz), 5.62 (1H, s), 4.09 (2H, q,  $J = 7.2$  Hz), 3.62-3.44 (3H, m), 3.17-3.02 (2H, m), 2.44 (3H, s), 1.73-1.59 (2H, m), 1.48-1.33 (2H, m), 1.23 (3H, t,  $J = 7.2$  Hz);  $^{13}\text{C}$  NMR (100 MHz,  $\text{CDCl}_3$ )  $\delta$ : 163.84 (d,  $J = 9.9$  Hz), 162.21 (d,  $J = 249.4$  Hz), 158.45, 155.36, 153.28 (d,  $J = 7.8$  Hz), 152.76 (d,  $J = 2.2$  Hz), 150.98-150.64 (2C, m), 141.63 (d,  $J = 7.8$  Hz), 140.06 (d,  $J = 7.2$  Hz), 138.47, 137.34, 136.68-136.51 (m), 136.01-135.82 (m), 134.63-134.36 (m), 133.90, 130.80 (d,  $J = 13.3$  Hz), 128.74 (d,  $J = 83.4$  Hz), 128.72, 128.62 (d,  $J = 9.0$  Hz), 128.43, 125.91 (d,  $J = 8.1$  Hz), 124.96 (d,  $J = 83.9$  Hz), 124.06, 123.52 (d,  $J = 9.0$  Hz), 122.95, 120.73 (q,  $J = 321.2$  Hz), 117.38, 116.4 (d,  $J = 23.3$  Hz), 115.36 (d,  $J = 88.8$  Hz), 115.12 (d,  $J = 88.8$  Hz), 114.44 (d,  $J = 22.2$  Hz), 79.76, 72.91, 61.24, 40.78, 40.70, 31.32, 30.27, 24.50, 14.63;  $^{19}\text{F}$  NMR (365 MHz,  $\text{CDCl}_3$ )  $\delta$ : -110.66 (t,  $J = 9.4$  Hz), -78.16;  $^{31}\text{P}$  (162 MHz,  $\text{CDCl}_3$ )  $\delta$ : 20.63;  $m/z$  HRMS (ESI + APCI) found  $[\text{M-OTf}]^+$  821.2852,  $\text{C}_{49}\text{H}_{44}\text{ClF}_4\text{N}_4\text{O}_3\text{P}^+$  requires 821.2824.

**(4-(((2*R*, 6*S*)-2,6-Dimethylmorpholino)methyl)quinolin-2-yl)(3-(3-fluoro-5-(6-methylpyridin-2-yl)phenyl)pyridin-4-yl)diphenylphosphonium trifluoromethanesulfonate (3n)**

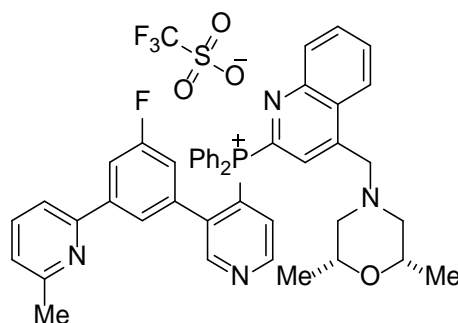

Prepared according to general procedure B using 2-(3-fluoro-5-(pyridin-3-yl)phenyl)-6-methylpyridine (132 mg, 0.50 mmol), Tf<sub>2</sub>O (84 μL, 0.50 mmol), (2*R*, 6*S*)-4-((2-(diphenylphosphaneyl)quinolin-4-yl)methyl)-2,6-dimethylmorpholine (242 mg, 0.55 mmol), DBU (75 μL, 0.50 mmol) and CH<sub>2</sub>Cl<sub>2</sub> (5 mL). After the purification procedure, the title compound was isolated as an off white solid (317 mg, 0.37 mmol, 74% yield). mp 106-111 °C; IR ν<sub>max</sub>/cm<sup>-1</sup> (film): 3063, 2971, 2930, 2856, 1575, 1439, 1263, 1223, 1143, 1030, 728; <sup>1</sup>H NMR (400 MHz, CDCl<sub>3</sub>) δ: 9.03 (1H, app t, *J* = 4.7 Hz), 8.75 (1H, d, *J* = 6.8 Hz), 8.12 (1H, d, *J* = 8.4 Hz), 8.02-7.89 (6H, m), 7.88-7.75 (6H, m), 7.59 (1H, t, *J* = 7.7 Hz), 7.55-7.36 (4H, m), 7.05 (1H, d, *J* = 7.7 Hz), 6.93 (1H, s), 6.64 (1H, d, *J* = 7.8 Hz), 6.31 (1H, d, *J* = 8.2 Hz), 3.75 (2H, s), 3.43-3.21 (2H, m), 2.52-2.38 (5H, m), 1.83 (2H, t, *J* = 10.2 Hz), 1.07 (6H, d, *J* = 6.3 Hz); <sup>13</sup>C NMR (100 MHz, CDCl<sub>3</sub>) δ: 162.04 (d, *J* = 249.4 Hz), 158.29, 152.53 (d, *J* = 7.4 Hz), 152.27 (d, *J* = 2.5 Hz), 150.80 (d, *J* = 10.5 Hz), 148.33 (d, *J* = 23.0), 147.71 (br), 144.34 (d, *J* = 118.4 Hz), 141.49 (d, *J* = 8.0 Hz), 139.73 (d, *J* = 7.3 Hz), 137.38-137.20 (m), 137.12, 136.08 (d, *J* = 3.1 Hz), 135.06 (d, *J* = 9.8 Hz), 131.61, 130.76 (d, *J* = 12.9 Hz), 130.22 (2C, m), 128.95 (d, *J* = 9.7 Hz), 128.39 (d, *J* = 85.0 Hz), 127.11 (d, *J* = 3.4 Hz), 123.26, 123.04 (d, *J* = 2.5 Hz), 122.91, 122.44 (d, *J* = 28.4 Hz), 120.85 (q, *J* = 321.3 Hz), 116.58 (d, *J* = 86.4 Hz), 116.55, 116.00 (d, *J* = 23.4 Hz), 113.76 (d, *J* = 22.6 Hz), 71.62, 59.29, 57.36, 24.58, 18.86; <sup>19</sup>F NMR (365 MHz, CDCl<sub>3</sub>) δ: -78.07, -111.47 (t, *J* = 10.2 Hz); <sup>31</sup>P (162 MHz, CDCl<sub>3</sub>) δ: 11.94; *m/z* HRMS (ESI + APCI) found [M-OTf]<sup>+</sup> 703.2979, C<sub>45</sub>H<sub>41</sub>FN<sub>4</sub>OP<sup>+</sup> requires 703.3002.

**(4-(((2*S*, 6*R*)-2,6-Dimethylmorpholino)methyl)quinolin-2-yl)(3-(((*R*)-1-(3-fluoro-4-(trifluoromethyl)benzyl)pyrrolidin-2-yl)methoxy)pyridin-4-yl)diphenylphosphonium trifluoromethanesulfonate (3o)**

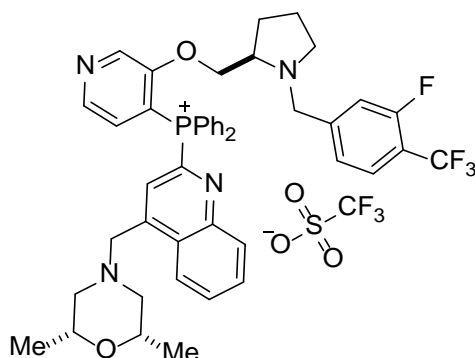

Prepared according to general procedure B, using (*R*)-3-(((1-(3-fluoro-4-(trifluoromethyl)benzyl)pyrrolidin-2-yl)methoxy)pyridine (177 mg, 0.50 mmol), Tf<sub>2</sub>O (85 μL, 0.50 mmol), (*2R*, *6S*)-4-((2-(diphenylphosphaneyl)quinolin-4-yl)methyl)-2,6-dimethylmorpholine (242 mg, 0.55 mmol), DBU (75 μL, 0.89 mmol), and CH<sub>2</sub>Cl<sub>2</sub> (5 mL). After the purification procedure (concentrated CH<sub>2</sub>Cl<sub>2</sub> solution of crude product was added dropwise to an excess of 50% Et<sub>2</sub>O in hexanes instead of Et<sub>2</sub>O), the title compound was provided as a brown amorphous solid (310 mg, 0.33 mmol, 66% yield). IR ν<sub>max</sub>/cm<sup>-1</sup> (film): 3061, 3012, 2974, 2935, 2875, 2818, 1630, 1440, 909, 689, 665, 636, 603; <sup>1</sup>H NMR (400 MHz, CDCl<sub>3</sub>) δ: 8.75 (1H, d, *J* = 6.6 Hz), 8.65-8.60 (1H, m), 8.23 (1H, dd, *J* = 7.9, 0.7 Hz), 8.15 (1H, d, *J* = 8.4 Hz), 7.98-7.69 (13H, m), 7.34 (1H, t, *J* = 7.7 Hz), 7.12 (1H, dd, *J* = 19.6, 9.8 Hz), 6.85-6.69 (2H, m), 4.10-3.91 (4H, m), 3.53-3.40 (2H, m), 3.34 (1H, d, *J* = 14.2 Hz), 2.80 (1H, d, *J* = 13.8 Hz), 2.65-2.51 (3H, m), 2.07-1.87 (3H, m), 1.87-1.74 (1H, m), 1.69-1.54 (1H, m), 1.47-1.25 (3H, m), 1.11 (6H, app t, *J* = 5.9 Hz); <sup>13</sup>C NMR (100 MHz, CDCl<sub>3</sub>) δ: 159.46 (dq, *J* = 257.36 257.4, 2.3 Hz), 155.69, 148.76 (d, *J* = 23.1 Hz), 148.24, (d, *J* = 11.2 Hz), 144.40 (d, *J* = 10.2 Hz), 143.96 (d, *J* = 120.6 Hz), 136.87 (m), 135.79 (m), 134.55-134.19 (m), 131.76, 130.66 (d, *J* = 13.2 Hz), 130.63, 129.17, 128.57, 128.27 (d, *J* = 73.9 Hz), 127.00-126.76 (m, 2C), 124.03, 123.86, 123.63 (d, *J* = 3.6 Hz), 122.37, 122.50 (dq, *J* = 273.6 Hz), 120.76 (q, *J* = 318.4 Hz), 116.78 (dd, *J* = 89.6, 3.1 Hz), 116.11 (dd, *J* = 91.4, 1.4 Hz), 114.57 (d, *J* = 86.2 Hz), 73.54, 71.64, 62.21, 59.64, 59.39 (d, *J* = 4.7 Hz), 58.10, 54.07, 27.83, 22.56, 19.96 (d, *J* = 3.2 Hz); <sup>19</sup>F NMR (365 MHz, CDCl<sub>3</sub>) δ: -61.13 (d, *J* = 13.74 13.7 Hz), -78.14, -114.39- (-)115.04 (m); <sup>31</sup>P NMR (162 MHz, CDCl<sub>3</sub>) δ: 12.52; *m/z* HRMS (ESI + APCI) found [M-OTf]<sup>+</sup> 793.3407, C<sub>46</sub>H<sub>46</sub>F<sub>4</sub>N<sub>4</sub>O<sub>2</sub>P<sup>+</sup> requires 793.3295.

**(2-(1-(4-Chlorophenyl)-3-(dimethylamino)propyl)pyridin-4-yl)diphenyl(2-phenylpyridin-4-yl)phosphonium trifluoromethanesulfonate (3p)**

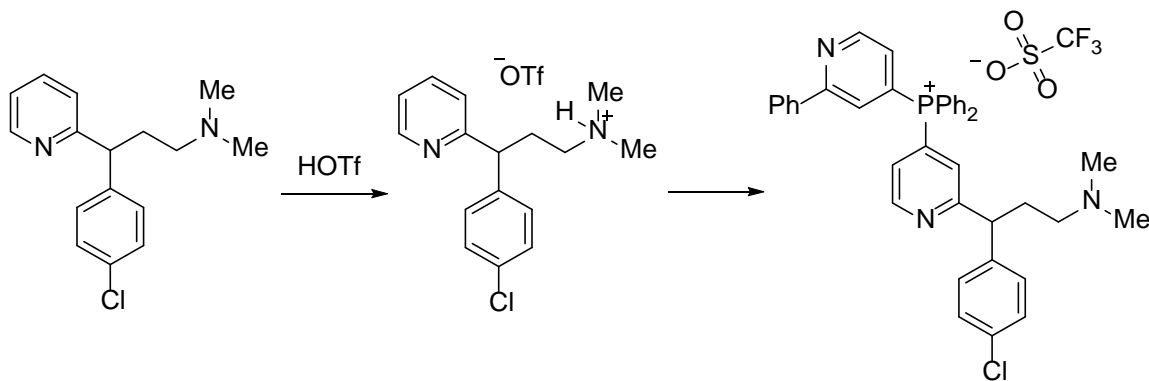

Chlorphenamine (412.2 mg, 1.50 mmol) was dissolved in Et<sub>2</sub>O (3 mL) and cooled to 0 °C. Trifluoromethanesulfonic acid (134 μL, 1.50 mmol) was added dropwise, the ice bath was removed and the solution was stirred for 10 minutes at room temperature. The solution was concentrated *in vacuo* and the resulting acid salt was subjected to general procedure B (except that after 4-(diphenylphosphino)-2-phenylpyridine was added, the reaction mixture was stirred for 30 min at -78 °C) using Tf<sub>2</sub>O (252 μL, 1.50 mmol), 4-(diphenylphosphino)-2-phenylpyridine (560 mg, 1.65 mmol), DBU (450 μL, 3.00 mmol) and CH<sub>2</sub>Cl<sub>2</sub> (15 mL). After the purification procedure, the title compound was isolated as a white amorphous powder (714 mg, 0.95 mmol, 63% yield). mp 130-133 °C; IR  $\nu_{\max}/\text{cm}^{-1}$  (film): 3060, 1574, 1489, 1468, 1440, 1378, 1259, 1223, 1150, 1124, 1109, 1028, 729, 636; <sup>1</sup>H NMR (400 MHz, CDCl<sub>3</sub>)  $\delta$ : 9.05 (1H, d, *J* = 5.2 Hz), 9.00 (1H, t, *J* = 5.2 Hz), 7.95-7.87 (4H, m), 7.80-7.77 (5H, m), 7.70-7.65 (4H, m), 7.52-7.45 (5H, m), 7.39 (1H, dd, *J* = 13.0, 4.8 Hz), 7.27 (2H, d, *J* = 8.3 Hz), 7.17 (2H, d, *J* = 8.3 Hz), 4.46 (1H, t, *J* = 7.4 Hz), 3.07-2.93 (2H, m), 2.83-2.76 (1H, m), 2.69 (6H, s), 2.44-2.35 (1H, m); <sup>13</sup>C NMR (100 MHz, CDCl<sub>3</sub>)  $\delta$ : 164.22 (d, *J* = 9.6 Hz), 159.31 (d, *J* = 10.3 Hz), 151.77 (d, *J* = 10.9 Hz), 151.36 (d, *J* = 10.5 Hz), 139.50, 136.68 (d, *J* = 1.6 Hz), 136.48 (d, *J* = 2.5 Hz), 134.56 (d, *J* = 10.6 Hz), 133.05, 131.13, 130.99, 130.53, 129.42, 129.06, 128.98, 127.58 (d, *J* = 83.9 Hz), 127.27 (d, *J* = 83.6 Hz), 127.13, 125.31 (d, *J* = 8.3 Hz), 125.09 (d, *J* = 8.2 Hz), 123.20 (d, *J* = 8.8 Hz), 120.40 (q, *J* = 318.7 Hz), 114.01 (d, *J* = 88.9 Hz), 56.27, 49.15, 43.36, 29.65; <sup>19</sup>F NMR (365 MHz, CDCl<sub>3</sub>)  $\delta$ : -78.30; <sup>31</sup>P NMR (162 MHz, CDCl<sub>3</sub>)  $\delta$ : 22.06; *m/z* HRMS (ESI + APCI) found [M-OTf]<sup>+</sup> 612.2328, C<sub>39</sub>H<sub>36</sub>ClN<sub>3</sub>P<sup>+</sup> requires 612.2335.

**(2-(4-Bromophenyl)pyridin-4-yl)(8-chloro-11-(1-(ethoxycarbonyl)piperidin-4-ylidene)-6,11-dihydro-5H-benzo[5,6]cyclohepta[1,2-b]pyridin-4-yl)diphenylphosphonium trifluoromethanesulfonate (3q)**

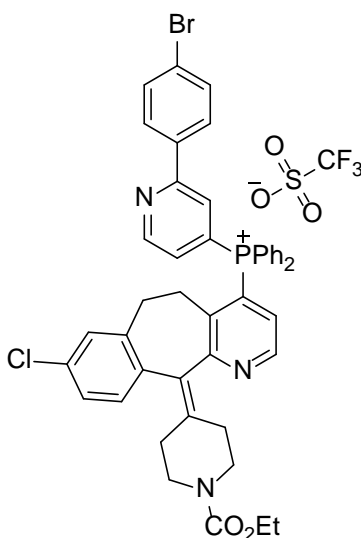

Prepared according to general procedure B using loratadine (383 mg, 1.00 mmol), Tf<sub>2</sub>O (168 μL, 1.00 mmol), 2-(4-Bromophenyl)-4-(diphenylphosphanyl)pyridine (460 mg, 1.10 mmol), DBU (149 μL, 1.00 mmol) and CH<sub>2</sub>Cl<sub>2</sub> (10 mL). After the purification procedure, the title compound was isolated as an off white solid (770 mg, 0.81 mmol, 81% yield). mp 159-164 °C; IR  $\nu_{\text{max}}/\text{cm}^{-1}$  (film): 3055, 2981, 1687, 1438, 1262, 1223, 1109, 1030, 730; <sup>1</sup>H NMR (400 MHz, CDCl<sub>3</sub>)  $\delta$ : 9.01 (1H, app t,  $J = 5.1$  Hz), 8.73 (1H, app t,  $J = 4.7$  Hz), 8.05-7.62 (13H, m), 7.60-7.40 (3H, m) 7.16 (1H, dd,  $J = 7.7, 5.1$  Hz), 7.06 (2H, s), 6.63 (1H, s), 4.06 (2H, q,  $J = 6.8$  Hz), 3.80-3.57 (2H, m), 3.40-3.16 (3H, m) 2.74 (1H, d,  $J = 17.4$  Hz), 2.63-2.09 (5H, m), 1.60-1.39 (1H, m), 1.20 (3H, t,  $J = 7.0$  Hz); <sup>13</sup>C NMR (100 MHz, CDCl<sub>3</sub>)  $\delta$ : 163.34 (d,  $J = 8.5$  Hz), 158.14 (d,  $J = 10.5$  Hz), 155.15, 151.83 (d,  $J = 10.9$  Hz), 149.26 (d,  $J = 11.6$  Hz), 139.30, 136.53, 136.46-136.12 (2C, m), 135.45 (d,  $J = 1.4$  Hz), 134.26 (d,  $J = 10.6$  Hz), 133.83, 133.37, 132.17-131.89 (2C, m), 131.41, 131.20 (d,  $J = 13.2$  Hz), 129.64, 128.71, 128.64 (d,  $J = 83.6$  Hz), 127.54 (d,  $J = 10.3$  Hz), 126.28, 125.35 (d,  $J = 8.3$  Hz), 125.14 (d,  $J = 82.3$  Hz), 122.94 (d,  $J = 8.9$  Hz), 120.48 (q,  $J = 321.4$  Hz), 114.84 (d,  $J = 88.2$  Hz), 114.39 (d,  $J = 88.1$  Hz), 61.17, 44.48, 44.34, 30.52, 30.43-30.10 (2C, m), 29.30, 14.45; <sup>19</sup>F NMR (365 MHz, CDCl<sub>3</sub>)  $\delta$ : -78.15; <sup>31</sup>P (162 MHz, CDCl<sub>3</sub>)  $\delta$ : 20.87;  $m/z$  HRMS (ESI + APCI) found [M-OTf]<sup>+</sup> 798.1693, C<sub>45</sub>H<sub>39</sub>BrClN<sub>3</sub>O<sub>2</sub>P<sup>+</sup> requires 798.1652.

**(2-(2-Chloro-5-(2-chloro-4-(methylsulfonyl)benzamido)phenyl)pyridin-4-yl)(4-methylquinolin-2-yl)diphenylphosphonium trifluoromethanesulfonate (3r)**

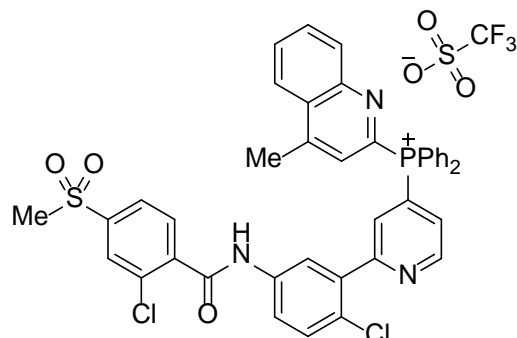

Prepared according to general procedure B (except the stirring time after the addition of Tf<sub>2</sub>O was 2 hours instead of 30 minutes, the stirring time after the addition of the phosphine was 1.5 hours instead of 30 minutes, and after the addition of DBU the reaction was allowed to slowly warm from -78 °C to 0 °C over 3 hours instead of warming from -78 °C to room temperature over approximately 15-30 minutes) using vismodegib (506 mg, 1.20 mmol), Tf<sub>2</sub>O (200 μL, 1.20 mmol), 2-(diphenylphosphaneyl)-4-methylquinoline (432 mg, 1.32 mmol), DBU (180 μL, 1.20 mmol) and CH<sub>2</sub>Cl<sub>2</sub> (30 mL). After the purification procedure (concentrated CH<sub>2</sub>Cl<sub>2</sub> solution was added dropwise to an excess of Et<sub>2</sub>O at room temperature. The resulting suspension was immediately filtered on a frit and the solid was washed with room temperature Et<sub>2</sub>O. The solid was dissolved in approximately 5 mL CH<sub>2</sub>Cl<sub>2</sub> and this process was repeated (4x) before the solid was dried *in vacuo* to provide the pure phosphonium salt), the title compound was isolated as a pale yellow solid (592 mg, 0.66 mmol, 55% yield). mp 119-125 °C; IR ν<sub>max</sub>/cm<sup>-1</sup> (film): 3255, 3062, 1681, 1575, 1539, 1439, 1364, 1315, 1274, 1246, 1152, 1029, 726; <sup>1</sup>H NMR (400 MHz, CDCl<sub>3</sub>) δ: 9.90 (1H, s), 8.98 (1H, app t, *J* = 5.1 Hz), 8.24-8.09 (3H, m), 8.01-7.59 (18H, m), 7.56 (1H, d, *J* = 4.8 Hz), 7.31-7.23 (1H, m), 2.93 (3H, s), 2.77 (3H, s); <sup>13</sup>C NMR (100 MHz, CDCl<sub>3</sub>) δ: 164.27, 157.96 (d, *J* = 10.9 Hz), 150.87 (d, *J* = 10.6 Hz), 148.76 (d, *J* = 10.9 Hz), 148.46 (d, *J* = 23.0 Hz), 142.65 (d, *J* = 118.3), 142.04, 140.23, 137.66, 136.79 (d, *J* = 1.6 Hz), 136.05 (d, *J* = 2.7 Hz), 134.58 (d, *J* = 10.3 Hz), 132.23, 131.83, 130.92-130.42 (2C, m), 130.29, 129.85, 128.77 (d, *J* = 3.1 Hz), 128.46 (d, *J* = 83.7 Hz), 128.59-128.24 (3C, m), 126.35, 125.82 (d, *J* = 7.6 Hz), 125.59, 125.10 (d, *J* = 27.0 Hz), 124.31, 123.07, 122.38, 120.24 (d, *J* = 320.9 Hz), 115.31 (d, *J* = 87.8 Hz), 44.14, 19.05 (d, *J* = 1.4 Hz); <sup>19</sup>F NMR (365 MHz, CDCl<sub>3</sub>) δ: -78.30; <sup>31</sup>P (162 MHz, CDCl<sub>3</sub>) δ: 13.30; *m/z* HRMS (ESI + APCI) found [M-OTf]<sup>+</sup> 746.1185, C<sub>41</sub>H<sub>31</sub>Cl<sub>2</sub>N<sub>3</sub>O<sub>3</sub>PS<sup>+</sup> requires 746.1201.

**(5,7-Dichloro-4-(4-fluorophenoxy)quinolin-2-yl)(4-ethoxyquinolin-2-yl)diphenylphosphonium trifluoromethanesulfonate (3s)**

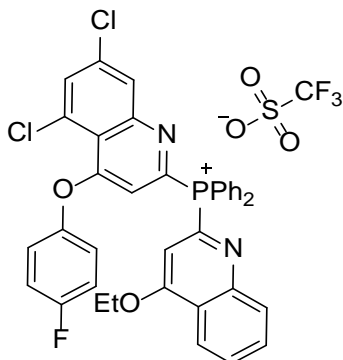

Prepared according to general procedure B, using 5,7-dichloro-4-(4-fluorophenoxy)quinoline

(308 mg, 1.00 mmol), Tf<sub>2</sub>O (168 μL, 1.00 mmol), 2-(diphenylphosphaneyl)-4-ethoxyquinoline (392 mg, 1.10 mmol), DBU (150 μL, 1.00 mmol), and EtOAc (10 mL). After the purification procedure (concentrated CH<sub>2</sub>Cl<sub>2</sub> solution of crude product was added dropwise to an excess of 50% Et<sub>2</sub>O in hexanes instead of Et<sub>2</sub>O), the title compound was provided as a brown amorphous solid (400 mg, 0.49 mmol, 49% yield). IR ν<sub>max</sub>/cm<sup>-1</sup> (film): 3070, 2989, 2248, 855, 834, 646, 594, 572; <sup>1</sup>H NMR (400 MHz, CDCl<sub>3</sub>) δ: 8.31 (1H, d, *J* = 8.1 Hz), 8.02 (1H, d, *J* = 2.1 Hz), 7.87-7.64 (14H, m), 7.16-7.04 (3H, m), 7.00 (1H, d, *J* = 6.4 Hz), 6.96-6.88 (2H, m), 4.14 (2H, q, *J* = 7.0 Hz), 1.47 (3H, t, *J* = 7.0 Hz); <sup>13</sup>C NMR (100 MHz, CDCl<sub>3</sub>) δ: 164.34 (d, *J* = 12.9 Hz), 153.30 (d, *J* = 14.0 Hz), 160.27 (d, *J* = 246.1 Hz), 151.68 (d, *J* = 25.5 Hz), 149.24 (d, *J* = 25.4 Hz), 148.30 (d, *J* = 117.4 Hz), 148.14 (d, *J* = 2.8 Hz), 144.56 (d, *J* = 116.9 Hz), 136.97, 135.54 (d, *J* = 2.9 Hz), 134.68 (d, *J* = 10.0 Hz), 132.24, 131.67, 131.09 (d, *J* = 1.2 Hz), 130.27 (d, *J* = 13.0 Hz), 129.13, 127.99, 122.77 (d, *J* = 8.6 Hz), 122.45, 121.56 (d, *J* = 2.3 Hz), 120.64 (q, *J* = 321.3 Hz), 118.17 (d, *J* = 2.3 Hz), 117.21, 116.96, 116.51 (d, *J* = 87.5 Hz), 110.93 (d, *J* = 26.9 Hz), 105.92 (d, *J* = 29.0 Hz), 65.51, 13.93; <sup>19</sup>F NMR (365 MHz, CDCl<sub>3</sub>) δ: -78.19, -114.90- (-)115.01 (m); <sup>31</sup>P NMR (162 MHz, CDCl<sub>3</sub>) δ: 8.41; *m/z* HRMS (ESI + APCI) found [M-OTf]<sup>+</sup> 663.1166, C<sub>38</sub>H<sub>27</sub>Cl<sub>2</sub>FN<sub>2</sub>O<sub>2</sub>P<sup>+</sup> requires 663.1199.

**(5-Chloro-6'-methyl-3-(4-(methylsulfonyl)phenyl)-[2,3'-bipyridin]-4'-yl)(4-methylquinolin-2-yl)diphenylphosphonium trifluoromethanesulfonate (3t)**

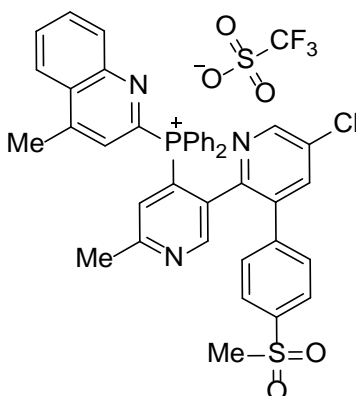

Prepared according to general procedure B except with NaOAc added with phosphine, using 5-chloro-6'-methyl-3-(4-(methylsulfonyl)phenyl)-2,3'-bipyridine (538 mg, 1.50 mmol), Tf<sub>2</sub>O (255  $\mu$ L, 1.50 mmol), 2-(diphenylphosphaneyl)-4-methylquinoline (540 mg, 1.65 mmol), DBU (225  $\mu$ L, 1.50 mmol), NaOAc (123 mg, 1.50 mmol) and CH<sub>2</sub>Cl<sub>2</sub> (15 mL). After the purification procedure (concentrated CH<sub>2</sub>Cl<sub>2</sub> solution was added dropwise to an excess of Et<sub>2</sub>O at room temperature. The resulting suspension was immediately filtered on a frit and the solid was washed with room temperature Et<sub>2</sub>O. The solid was dissolved in approximately 5 mL CH<sub>2</sub>Cl<sub>2</sub> and this process was repeated (3x) before the solid was dried *in vacuo* to provide the pure phosphonium salt), the title compound was provided as a yellow crystalline solid (840 mg, 1.04 mmol, 69% yield). mp 165-170 °C; IR  $\nu_{\text{max}}/\text{cm}^{-1}$  (film): 3060, 1576, 1312, 770, 721, 547; <sup>1</sup>H NMR (400 MHz, CDCl<sub>3</sub>)  $\delta$ : 8.24 (1H, d,  $J = 7.0$  Hz), 8.12-7.93 (8H, m), 7.87-7.67 (9H, m), 7.62-7.55 (3H, m), 7.30-7.23 (2H, m), 3.17 (3H, s), 2.74 (3H, s), 2.60 (3H, s); <sup>13</sup>C NMR (100 MHz, CDCl<sub>3</sub>)  $\delta$ : 160.87 (d,  $J = 11.1$  Hz), 152.08 (d,  $J = 7.2$  Hz), 148.24 (d,  $J = 11.1$  Hz), 147.98 (d,  $J = 2.1$  Hz), 147.32 (d,  $J = 24.0$  Hz), 147.15 (d,  $J = 125.9$  Hz), 146.15, 141.55, 141.15, 138.54, 135.30, 135.29, 135.13 (d,  $J = 3.0$  Hz), 134.85 (d,  $J = 9.4$  Hz), 133.39 (d,  $J = 3.2$  Hz), 131.95, 131.71, 130.71 (d,  $J = 10.1$  Hz), 130.23, 130.07 (d,  $J = 6.3$  Hz), 129.74 (d,  $J = 1.3$  Hz), 128.92 (d,  $J = 87.0$  Hz), 128.36, 128.12 (d,  $J = 3.1$  Hz), 124.45, 123.53 (d,  $J = 26.9$  Hz), 120.83 (q,  $J = 321.2$  Hz), 119.37 (d,  $J = 88.5$  Hz), 44.14, 24.62, 18.84 (d,  $J = 1.6$  Hz); <sup>19</sup>F NMR (365 MHz, CDCl<sub>3</sub>)  $\delta$ : -78.15; <sup>31</sup>P NMR (162 MHz, CDCl<sub>3</sub>)  $\delta$ : 16.31;  $m/z$  HRMS (ESI + APCI) found [M-OTf]<sup>+</sup> 684.1666 C<sub>40</sub>H<sub>32</sub>ClN<sub>3</sub>O<sub>2</sub>PS<sup>+</sup> requires 684.1641.



**(3-(2-((2-Methyl-5-(4-((4-methylpiperazin-1-yl)methyl)benzamido)phenyl)amino)pyrimidin-4-yl)pyridin-4-yl)(4-methylquinolin-2-yl)diphenylphosphonium trifluoromethanesulfonate (3u)**

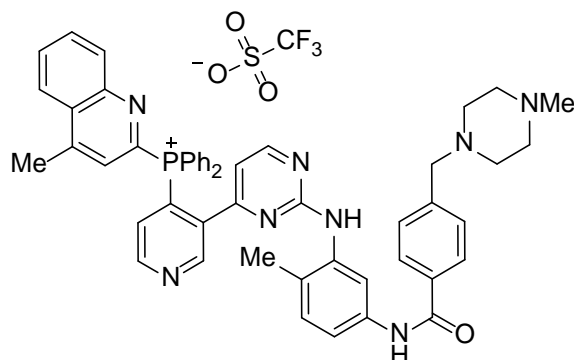

Prepared according to general procedure B (except that the stirring time after addition of  $\text{Tf}_2\text{O}$  was 2 hours instead of 30 minutes, the stirring time after addition of 2-(diphenylphosphino)-4-methylquinoline was 1.5 hours instead of 30 minutes, and after the addition of DBU the reaction was allowed to slowly warm from  $-78\text{ }^\circ\text{C}$  to  $0\text{ }^\circ\text{C}$  over 3 hours instead of warming from  $-78\text{ }^\circ\text{C}$  to room temperature over approximately 15-30 minutes) using (1*S*,2*S*,4*S*,5*R*)-2-((*R*)-(benzyloxy)(quinolin-4-yl)methyl)-5-vinylquinuclidine (592 mg, 1.20 mmol),  $\text{Tf}_2\text{O}$  (200  $\mu\text{L}$ , 1.20 mmol), 2-(diphenylphosphino)-4-methylquinoline (432 mg, 1.32 mmol), DBU (180  $\mu\text{L}$ , 1.20 mmol) and  $\text{CH}_2\text{Cl}_2$  (30 mL). After the purification procedure (concentrated  $\text{CH}_2\text{Cl}_2$  solution was added dropwise to an excess of  $\text{Et}_2\text{O}$  at room temperature. The resulting suspension was immediately filtered on a frit and the solid was washed with room temperature  $\text{Et}_2\text{O}$ . The solid was dissolved in approximately 5 mL  $\text{CH}_2\text{Cl}_2$  and this process was repeated (3x) before the solid was dried *in vacuo* to provide the pure phosphonium salt), the title compound was isolated as a yellow amorphous powder (710 mg, 0.73 mmol, 61% yield). mp  $155\text{--}158\text{ }^\circ\text{C}$ ; IR  $\nu_{\text{max}}/\text{cm}^{-1}$  (film): 3316, 3056, 2795, 1662, 1568, 1527, 1505, 1474, 1450, 1406, 1254, 1222, 1149, 1104, 1028, 857, 815, 752, 726, 689;  $^1\text{H}$  NMR (400 MHz,  $\text{CDCl}_3$ )  $\delta$ : 9.52 (1H, d,  $J = 6.4$  Hz), 9.04 (1H, dd,  $J = 4.8, 4.4$  Hz), 8.53 (1H, s), 8.23 (1H, d,  $J = 5.1$  Hz), 8.01–7.99 (1H, m), 7.87–7.59 (15H, m), 7.52 (1H, d,  $J = 4.8$  Hz), 7.45 (1H, dd,  $J = 4.3, 2.0$  Hz), 7.39 (2H, d,  $J = 8.2$  Hz), 7.28 (1H, dd,  $J = 15.7, 5.1$  Hz), 7.22 (1H, d,  $J = 5.2$  Hz), 7.06 (1H, d,  $J = 1.9$  Hz), 6.92 (1H, d,  $J = 8.5$  Hz), 5.51 (1H, s), 3.54 (2H, s), 2.77–2.51 (14H, m), 1.50 (3H, s);  $^{13}\text{C}$  NMR (100 MHz,  $\text{CD}_3\text{CN}$ )  $\delta$ : 166.21, 161.17, 159.55 (d,  $J = 1.1$  Hz), 159.01, 154.33 (d,  $J = 1.1$  Hz), 152.10 (d,  $J = 6.3$  Hz), 149.77 (d,  $J = 11.3$  Hz), 149.43, 148.63, 148.38, 148.10, 142.66, 137.94, 136.82, 136.06 (d,  $J = 2.1$  Hz), 135.71 (d,  $J = 9.3$  Hz), 135.33 (d,  $J = 85.6$  Hz), 132.86 (d,  $J = 9.8$  Hz), 132.23, 131.02 (d,  $J = 12.7$  Hz), 130.44 (d,  $J = 4.4$  Hz), 129.85, 129.45 (d,  $J = 3.0$  Hz), 128.45, 126.72, 126.06 (d,  $J = 84.5$  Hz), 125.56 (d,  $J = 1.0$  Hz), 123.30, 123.04, 122.31 (d,  $J = 90.6$  Hz), 122.01 (q,  $J = 319.1$  Hz), 117.99, 115.59, 110.10, 62.06, 55.02, 51.51, 44.62, 18.95 (d,  $J = 1.6$  Hz), 17.29;  $^{19}\text{F}$  NMR (365 MHz,  $\text{CDCl}_3$ )  $\delta$ :  $-78.13$ ;  $^{31}\text{P}$  NMR (162 MHz,  $\text{CDCl}_3$ )  $\delta$ : 18.51;  $m/z$  HRMS (ESI + APCI) found  $[\text{M-OTf}]^+$  819.3695,  $\text{C}_{51}\text{H}_{48}\text{N}_8\text{OP}^+$  requires 819.3689.

## Additional Examples Characterization

### Diphenyl(2-(thiophen-3-yl)pyridin-4-yl)(3-(trifluoromethyl)pyridin-4-yl)phosphonium trifluoromethanesulfonate

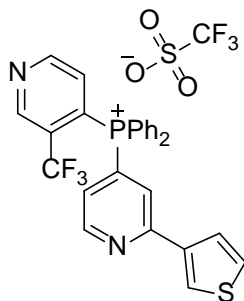

Prepared according to general procedure B using 3-(trifluoromethyl)pyridine (144  $\mu\text{L}$ , 1.25 mmol),  $\text{Ti}_2\text{O}$  (210  $\mu\text{L}$ , 1.25 mmol), 4-(diphenylphosphaneyl)-2-(thiophen-3-yl)pyridine (475 mg, 1.375 mmol), DBU (187  $\mu\text{L}$ , 1.25 mmol) and  $\text{CH}_2\text{Cl}_2$  (12.5 mL). After the purification procedure, the title compound was isolated as an off white solid (633 mg, 0.99 mmol, 79% yield). mp 92-97  $^\circ\text{C}$ ; IR  $\nu_{\text{max}}/\text{cm}^{-1}$  (film): 3094, 1575, 1439, 1323, 1258, 1223, 1140, 1118, 1029, 723;  $^1\text{H}$  NMR (400 MHz,  $\text{CDCl}_3$ )  $\delta$ : 9.26 (1H, d,  $J = 6.4$  Hz), 9.19 (1H, br s), 8.96 (1H, t,  $J = 5.5$  Hz), 8.08 (1H, dd,  $J = 3.1, 1.3$  Hz), 7.96-7.87 (3H, m), 7.84-7.68 (8H, m), 7.64-7.55 (2H, m), 7.46 (1H, ddd,  $J = 13.4, 5.1, 1.5$  Hz), 7.36 (1H, dd,  $J = 5.1, 3.1$  Hz);  $^{13}\text{C}$  NMR (100 MHz,  $\text{CDCl}_3$ )  $\delta$ : 156.24 (d,  $J = 10.2$  Hz), 155.33 (d,  $J = 10.8$  Hz), 151.58 (d,  $J = 10.2$  Hz), 150.37-150.10 (m), 139.67 (d,  $J = 1.9$  Hz), 136.46 (d,  $J = 3.0$  Hz), 134.75 (d,  $J = 10.7$  Hz), 131.58 (d,  $J = 8.7$  Hz), 131.00 (d,  $J = 13.7$  Hz), 128.34 (d,  $J = 85.1$  Hz), 127.14, 126.91, 126.85 (qd,  $J = 33.0, 3.8$  Hz), 126.09, 124.35 (d,  $J = 8.3$  Hz), 124.11 (d,  $J = 80.2$  Hz), 123.13 (d,  $J = 9.0$  Hz), 122.37 (qd, 275.6, 2.9 Hz), 120.59 (q,  $J = 321.4$  Hz), 114.77 (d,  $J = 89.9$  Hz);  $^{19}\text{F}$  NMR (365 MHz,  $\text{CDCl}_3$ )  $\delta$ : -78.30, -53.70 (d,  $J = 2.6$  Hz);  $^{31}\text{P}$  (162 MHz,  $\text{CDCl}_3$ )  $\delta$ : 26.91;  $m/z$  HRMS (ESI + APCI) found  $[\text{M}-\text{OTf}]^+$  491.1888,  $\text{C}_{27}\text{H}_{19}\text{F}_3\text{N}_2\text{PS}^+$  requires 491.0959.

### Diphenyl(2-phenylpyridin-4-yl)(pyridin-2-yl)phosphonium trifluoromethanesulfonate

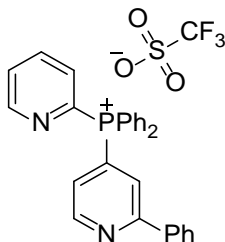

Prepared according to general procedure B (except that the reaction was warmed to -30  $^\circ\text{C}$  prior to the addition of the heteroaryl phosphine instead -50  $^\circ\text{C}$ ) using 2-phenylpyridine (1.29 mL, 9.0 mmol),  $\text{Ti}_2\text{O}$  (1.5 mL, 9.00 mmol), 2-(diphenylphosphaneyl)pyridine (2.61 g, 9.90 mmol), DBU (1.35 mL, 9.00 mmol) and  $\text{CH}_2\text{Cl}_2$  (90 mL). After the purification procedure, the title compound was isolated as a white solid (4.59 g, 8.11 mmol, 90% yield). mp 110-114  $^\circ\text{C}$ ; IR  $\nu_{\text{max}}/\text{cm}^{-1}$  (film): 3064, 1572, 1439, 1378, 1263, 1223, 1149, 1110, 1030, 728, 689, 637;  $^1\text{H}$  NMR (400 MHz,  $\text{CDCl}_3$ )  $\delta$ : 9.06-8.97 (2H, m), 8.23-8.15 (1H, m), 8.01 (1H, d,  $J = 13.9$  Hz), 7.97-7.66

(14 H, m), 7.56 (1H, dd,  $J = 12.8$  Hz, 5.1 Hz), 7.50-7.39 (3H, m);  $^{13}\text{C}$  NMR (100 MHz,  $\text{CDCl}_3$ )  $\delta$ : 158.54 (d,  $J = 10.2$  Hz), 152.37 (d,  $J = 19.8$  Hz), 150.97 (d,  $J = 10.8$  Hz), 142.67 (d,  $J = 120.96$  Hz), 138.57 (d,  $J = 10.8$  Hz), 136.64 (d,  $J = 1.5$  Hz), 135.90 (d,  $J = 2.9$  Hz), 134.27 (d,  $J = 10.3$  Hz), 132.10 (d,  $J = 25.1$  Hz), 130.55 (d,  $J = 13.1$  Hz), 129.95, 128.81 (d,  $J = 84.2$  Hz), 128.67 (2C), 126.74, 125.24 (d,  $J = 7.9$  Hz), 123.39 (d,  $J = 8.2$  Hz), 120.43 (q,  $J = 321.3$  Hz), 114.76 (d,  $J = 88.6$  Hz);  $^{19}\text{F}$  NMR (365 MHz,  $\text{CDCl}_3$ )  $\delta$ : -78.16;  $^{31}\text{P}$  (162 MHz,  $\text{CDCl}_3$ )  $\delta$ : 13.94;  $m/z$  HRMS (ESI + APCI) found  $[\text{M-OTf}]^+$  417.1545,  $\text{C}_{28}\text{H}_{22}\text{N}_2\text{P}^+$  requires 417.1521.

**(2-Butyl-3-(ethoxycarbonyl)pyridin-4-yl)(4-methylquinolin-2-yl)diphenylphosphonium trifluoromethanesulfonate**

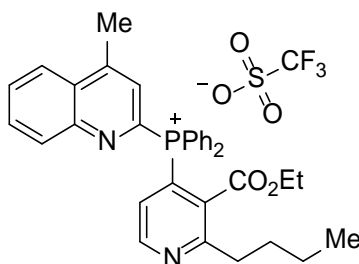

Prepared according to general procedure B (except that after 2-(diphenylphosphino)-4-methylquinoline was added, the reaction mixture was stirred for 30 min at  $-30$  °C) using ethyl 2-butylnicotinate (248.8 mg, 1.20 mmol),  $\text{Tf}_2\text{O}$  (336  $\mu\text{L}$ , 1.20 mmol), 2-(diphenylphosphino)-4-methylquinoline (432 mg, 1.32 mmol), DBU (180  $\mu\text{L}$ , 1.20 mmol) and  $\text{CH}_2\text{Cl}_2$  (12 mL). After the purification procedure, the title compound was isolated as a white amorphous powder (505 mg, 0.74 mmol, 62% yield). mp 135-138 °C; IR  $\nu_{\text{max}}/\text{cm}^{-1}$  (film): 3062, 2958, 2871, 1703, 1577, 1547, 1504, 1438, 1367, 1259, 1223, 1149, 1100, 1030, 998, 912, 857, 753, 724;  $^1\text{H}$  NMR (400 MHz,  $\text{CDCl}_3$ )  $\delta$ : 8.98 (1H, t,  $J = 4.7$  Hz), 8.17 (1H, d,  $J = 8.4$  Hz), 8.13 (1H, d,  $J = 8.4$  Hz), 7.92-7.71 (13H, m), 7.20 (1H, dd,  $J = 15.2$ , 5.0 Hz), 3.33 (2H, q,  $J = 7.1$  Hz), 3.09 (2H, t,  $J = 7.8$  Hz), 2.85 (3H, s), 1.82-1.75 (2H, m), 1.42 (2H, sext,  $J = 7.4$  Hz), 0.95 (3H, t,  $J = 7.3$  Hz), 0.78 (3H, t,  $J = 7.2$  Hz);  $^{13}\text{C}$  NMR (100 MHz,  $\text{CDCl}_3$ )  $\delta$ : 166.54 (d,  $J = 3.2$  Hz), 163.85 (d,  $J = 6.1$  Hz), 152.74 (d,  $J = 11.6$  Hz), 148.51 (d,  $J = 11.1$  Hz), 147.85, 147.61, 145.86, 144.63, 135.53 (d,  $J = 3.0$  Hz), 134.61 (d,  $J = 9.8$  Hz), 130.64 (d,  $J = 98.2$  Hz), 130.38 (d,  $J = 12.9$  Hz), 129.24 (d,  $J = 83.9$  Hz), 129.04 (d,  $J = 4.1$  Hz), 128.68 (d,  $J = 3.1$  Hz), 127.82 (d,  $J = 9.4$  Hz), 124.52 (d,  $J = 1.3$  Hz), 124.26, 120.81 (q,  $J = 319.8$  Hz), 117.58 (d,  $J = 87.7$  Hz), 62.83, 37.33 (d,  $J = 1.4$  Hz), 31.99, 22.66, 19.14 (d,  $J = 1.5$  Hz), 13.76, 13.01;  $^{19}\text{F}$  NMR (365 MHz,  $\text{CDCl}_3$ )  $\delta$ : -78.15;  $^{31}\text{P}$  NMR (162 MHz,  $\text{CDCl}_3$ )  $\delta$ : 19.61;  $m/z$  HRMS (ESI + APCI) found  $[\text{M-OTf}]^+$  533.2438,  $\text{C}_{34}\text{H}_{34}\text{N}_2\text{O}_2\text{P}^+$  requires 533.2358.

**(S)-(3-(1-Methylpyrrolidin-2-yl)pyridin-4-yl)diphenyl(2-phenylpyridin-4-yl)phosphonium trifluoromethanesulfonate**

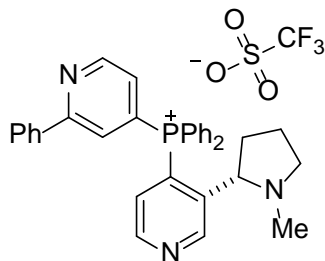

Prepared according to general procedure B (except that after 4-(diphenylphosphino)-2-phenylpyridine was added, the reaction mixture was stirred for 30 min at  $-78\text{ }^{\circ}\text{C}$ ) using (-)-nicotine (193  $\mu\text{L}$ , 1.20 mmol),  $\text{Tf}_2\text{O}$  (336  $\mu\text{L}$ , 1.20 mmol), 4-(diphenylphosphino)-2-phenylpyridine (448 mg, 1.32 mmol), DBU (180  $\mu\text{L}$ , 1.20 mmol) and  $\text{CH}_2\text{Cl}_2$  (12 mL). After the purification procedure, the title compound was isolated as a yellow amorphous powder (751 mg, 1.06 mmol, 88% yield). mp  $169\text{--}173\text{ }^{\circ}\text{C}$ ; IR  $\nu_{\text{max}}/\text{cm}^{-1}$  (film): 3060, 2944, 2786, 1571, 1536, 1484, 1467, 1441, 1399, 1377, 1258, 1223, 1150, 1107, 1029, 909, 775, 723, 690;  $^1\text{H}$  NMR (400 MHz,  $\text{CDCl}_3$ )  $\delta$ : 9.36 (1H, d,  $J = 7.2$  Hz), 9.09 (1H, t,  $J = 5.2$  Hz), 8.83 (1H, d,  $J = 4.8$  Hz), 7.95–7.80 (13H, m), 7.65 (1H, ddd,  $J = 12.9, 5.0, 1.2$  Hz), 7.47–7.45 (3H, m), 7.25 (1H, dd,  $J = 15.8, 5.1$  Hz), 3.05 (1H, t,  $J = 7.2$  Hz), 2.95 (1H, t,  $J = 8.1$  Hz), 2.00–1.93 (1H, m), 1.81–1.69 (4H, m), 1.46–1.34 (2H, m), 1.05–0.96 (1H, m);  $^{13}\text{C}$  NMR (100 MHz,  $\text{CDCl}_3$ )  $\delta$ : 159.19 (d,  $J = 10.2$  Hz), 152.92 (d,  $J = 8.1$  Hz), 151.98 (d,  $J = 10.8$  Hz), 150.20 (d,  $J = 10.7$  Hz), 144.01 (d,  $J = 6.7$  Hz), 136.61 (d,  $J = 1.7$  Hz), 136.38 (t,  $J = 3.6$  Hz), 134.41 (dd,  $J = 0.8, 10.6$  Hz), 131.27 (dd,  $J = 2.4, 13.1$  Hz), 130.51, 129.18 (d,  $J = 83.1$  Hz), 129.07, 127.84 (d,  $J = 10.0$  Hz), 127.07, 125.33 (d,  $J = 8.0$  Hz), 124.54 (d,  $J = 81.4$  Hz), 123.03 (d,  $J = 8.6$  Hz), 120.70 (q,  $J = 319.5$  Hz), 115.12 (dd,  $J = 19.9, 88.0$  Hz), 66.11 (d,  $J = 5.3$  Hz), 55.82, 39.26, 35.25, 22.84;  $^{19}\text{F}$  NMR (365 MHz,  $\text{CDCl}_3$ )  $\delta$ :  $-78.13$ ;  $^{31}\text{P}$  NMR (162 MHz,  $\text{CDCl}_3$ )  $\delta$ : 20.39;  $m/z$  HRMS (ESI + APCI) found  $[\text{M-OTf}]^+$  500.2265,  $\text{C}_{33}\text{H}_{31}\text{N}_3\text{P}^+$  requires 500.2256.

**(4-Methylquinolin-2-yl)(2-((1-(4-phenoxyphenoxy)propan-2-yl)oxy)pyridin-4-yl)diphenylphosphonium trifluoromethanesulfonate**

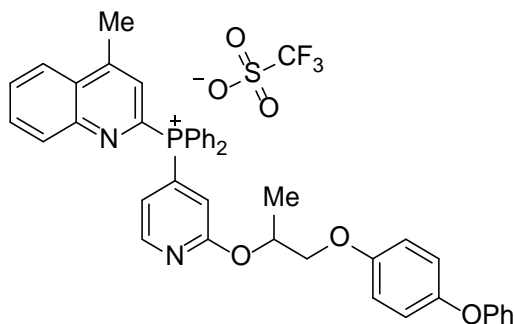

Prepared according to general procedure B (except that after 2-(diphenylphosphino)-4-methylquinoline was added, the reaction mixture was stirred for 30 min at  $-78\text{ }^{\circ}\text{C}$ ) using pyriproxyfen (424 mg, 1.32 mmol),  $\text{Tf}_2\text{O}$  (222  $\mu\text{L}$ , 1.32 mmol), 2-(diphenylphosphino)-4-methylquinoline (475 mg, 1.45 mmol), DBU (198  $\mu\text{L}$ , 1.32 mmol) and  $\text{CH}_2\text{Cl}_2$  (13 mL). After

the purification procedure, the title compound was isolated as a white amorphous powder (856 mg, 1.07 mmol, 81% yield). mp 75–78 °C; IR  $\nu_{\max}/\text{cm}^{-1}$  (film): 3063, 2983, 1585, 1541, 1503, 1488, 1438, 1399, 1340, 1311, 1260, 1218, 1150, 1108, 1076, 1029, 997, 988, 910, 872, 857, 845, 754, 725;  $^1\text{H}$  NMR (400 MHz,  $\text{CDCl}_3$ )  $\delta$ : 8.55 (1H, t,  $J = 5.4$  Hz), 8.19 (2H, dd,  $J = 7.6, 2.0$  Hz), 7.94–7.89 (3H, m), 7.86–7.74 (9H, m), 7.65 (1H, d,  $J = 4.4$  Hz), 7.32–7.26 (3H, m), 7.05–6.87 (8H, m), 5.69 (1H, sext,  $J = 5.4$  Hz), 4.19–4.10 (2H, m), 2.85 (3H, s), 1.51 (3H, d,  $J = 6.4$  Hz);  $^{13}\text{C}$  NMR (100 MHz,  $\text{CDCl}_3$ )  $\delta$ : 163.54 (d,  $J = 15.7$  Hz), 158.11, 154.71, 150.25, 149.36 (d,  $J = 12.1$  Hz), 148.98 (d,  $J = 10.8$  Hz), 148.50 (d,  $J = 22.8$  Hz), 143.42 (d,  $J = 117.2$  Hz), 136.07 (d,  $J = 2.9$  Hz), 134.63 (d,  $J = 10.2$  Hz), 131.76, 130.80 (d,  $J = 83.2$  Hz), 130.76 (d,  $J = 12.9$  Hz), 130.57, 129.46, 128.93 (d,  $J = 3.0$  Hz), 125.45, 125.18, 124.47 (d,  $J = 1.2$  Hz), 122.39, 120.78 (q,  $J = 319.6$  Hz), 120.52, 119.42 (d,  $J = 8.0$  Hz), 117.44, 116.99 (d,  $J = 9.6$  Hz), 115.58, 115.50 (d,  $J = 87.4$  Hz), 71.33, 70.51, 19.14 (d,  $J = 1.4$  Hz), 16.42;  $^{19}\text{F}$  NMR (365 MHz,  $\text{CDCl}_3$ )  $\delta$ : –78.30;  $^{31}\text{P}$  NMR (162 MHz,  $\text{CDCl}_3$ )  $\delta$ : 13.27;  $m/z$  HRMS (ESI + APCI) found  $[\text{M-OTf}]^+$  647.2502,  $\text{C}_{42}\text{H}_{36}\text{N}_2\text{O}_3\text{P}^+$  requires 647.2464.

**(4-((1R)-(Benzyloxy)((1R,4R)-5-vinylquinuclidin-2-yl)methyl)quinolin-2-yl)(4-methylquinolin-2-yl)diphenylphosphonium trifluoromethanesulfonate**

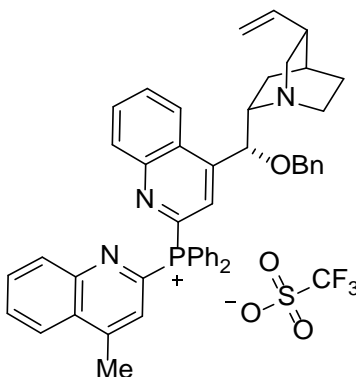

Prepared according to general procedure B (except that the stirring time after addition of 2-(diphenylphosphino)-4-methylquinoline was 1 hour instead of 30 minutes) using (1*S*,2*S*,4*S*,5*R*)-2-((*R*)-(benzyloxy)(quinolin-4-yl)methyl)-5-vinylquinuclidine (769 mg, 2.00 mmol),  $\text{Tf}_2\text{O}$  (336  $\mu\text{L}$ , 2.00 mmol), 2-(diphenylphosphino)-4-methylquinoline (720 mg, 2.20 mmol), DBU (300  $\mu\text{L}$ , 2.00 mmol) and  $\text{CH}_2\text{Cl}_2$  (20 mL). After the purification procedure (concentrated  $\text{CH}_2\text{Cl}_2$  solution was added dropwise to an excess of chilled  $\text{Et}_2\text{O}$  (0 °C). The mixture was then placed in a –20 °C refrigerator for approximately 1 hour. The resulting suspension was filtered on a frit and the solid was washed with chilled  $\text{Et}_2\text{O}$  (0 °C). The solid was redissolved in approximately 10 mL of  $\text{CH}_2\text{Cl}_2$  and was precipitated a second time via dropwise addition to an excess of chilled  $\text{Et}_2\text{O}$  (0 °C). The resulting suspension was filtered on a frit, the solid washed with chilled  $\text{Et}_2\text{O}$  (0 °C) and dried *in vacuo* to provide the pure phosphonium salt), the title compound was isolated as a white amorphous powder (671 mg, 0.78 mmol, 39% yield). mp 178–181 °C; IR  $\nu_{\max}/\text{cm}^{-1}$  (film): 3062, 2939, 2323, 1576, 1505, 1438, 1261, 1222, 1148, 1110, 1029, 997, 859, 754, 727, 636;  $^1\text{H}$  NMR (400 MHz,  $\text{CDCl}_3$ )  $\delta$ : 8.82 (1H, d,  $J = 7.4$  Hz), 8.23 (1H, d,  $J = 9.4$  Hz), 8.16–8.10 (2H, m), 7.94–7.26 (16H, m), 7.21–7.11 (3H, m), 6.98 (2H, d,  $J = 7.1$  Hz), 6.45 (1H, br s), 5.75–5.67 (1H, m), 5.05–5.00 (2H, m), 4.65 (1H, d,  $J = 11.1$  Hz), 4.36 (1H, d,  $J = 11.1$  Hz), 3.81 (1H, br s), 3.54 (1H, br s), 3.42 (1H, dd,  $J = 12.3, 11.5$  Hz), 3.12–3.05 (2H, m), 2.80 (3H, s), 2.70–2.64 (1H, m),

2.09-1.64 (5H, m);  $^{13}\text{C}$  NMR (100 MHz,  $\text{CDCl}_3$ )  $\delta$ : 149.02 (d,  $J = 22.5$  Hz), 148.48 (d,  $J = 10.4$  Hz), 148.28 (d,  $J = 23.0$  Hz), 145.52 (d,  $J = 10.2$  Hz), 145.35, 144.49, 143.76 (d,  $J = 83.9$  Hz), 137.21, 135.91, 135.57 (t,  $J = 3.7$  Hz), 134.97 (d,  $J = 9.7$  Hz), 134.79 (d,  $J = 9.7$  Hz), 131.91, 131.45, 131.14, 130.29 (d,  $J = 12.8$  Hz), 130.23 (d,  $J = 15.0$  Hz), 128.88 (d,  $J = 3.0$  Hz), 128.42, 128.01, 127.17, 126.37 (d,  $J = 2.9$  Hz), 125.95 (d,  $J = 25.5$  Hz), 124.47, 124.04, 120.51 (q,  $J = 319.1$  Hz), 117.05 (d,  $J = 86.7$  Hz), 117.03, 116.63 (d,  $J = 86.1$  Hz), 74.86, 71.76, 60.05, 54.53, 43.86, 36.75, 26.44, 23.99, 19.09 (d,  $J = 1.2$  Hz);  $^{19}\text{F}$  NMR (365 MHz,  $\text{CDCl}_3$ )  $\delta$ : -78.23;  $^{31}\text{P}$  NMR (162 MHz,  $\text{CDCl}_3$ )  $\delta$ : 8.74;  $m/z$  HRMS (ESI + APCI) found  $[\text{M-OTf}]^+$  710.3303,  $\text{C}_{48}\text{H}_{45}\text{N}_3\text{OP}^+$  requires 710.3300.

## 12d. Ligand-coupling Reactions to Make Heterobiaryls

### General Procedure C

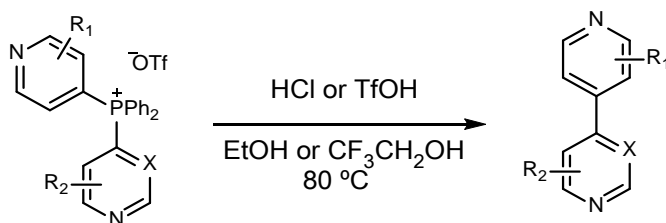

An oven dried 8 mL vial with a septa cap was charged with the phosphonium salt (1.0 equiv) and EtOH or TFE (0.4 M). The vial was subjected to three rapid cycles of vacuum / nitrogen backfill and then HCl or TfOH (2.0 equiv) was added via a syringe. The septa cap was quickly replaced with an unpierced one and the reaction was heated to 80 °C for the stated time. The reaction was quenched with a saturated aqueous solution of Na<sub>2</sub>CO<sub>3</sub> and the aqueous layer was extracted with CH<sub>2</sub>Cl<sub>2</sub> (3x). The combined organic extracts were washed with a saturated aqueous solution of brine, dried (MgSO<sub>4</sub>), filtered and concentrated *in vacuo*. The residue was purified by flash column chromatography under the stated conditions to provide the heterobiaryl.

### 2-Phenyl-4,4'-bipyridine (4a)

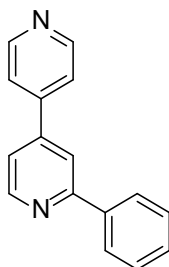

Prepared according to general procedure C using diphenyl(2-phenylpyridin-4-yl)(pyridin-4-yl)phosphonium trifluoromethanesulfonate (283 mg, 0.50 mmol), 4.0 M HCl in dioxanes (250  $\mu$ L, 1.00 mmol), and EtOH (1.25 mL). The reaction was heated to 80 °C for 14 hours. Flash column chromatography (silica gel, gradient elution: 40% EtOAc in hexanes to 50% EtOAc in hexanes) afforded the title compound as an off white solid (102 mg, 0.44 mmol, 88% yield). mp 64-65 °C; IR  $\nu_{\text{max}}/\text{cm}^{-1}$  (film): 3029, 1590, 1532, 1472, 1444, 1389, 1225, 808, 770, 731, 687; <sup>1</sup>H NMR (400 MHz, CDCl<sub>3</sub>)  $\delta$ : 8.87-8.59 (3H, m), 8.02 (2H, d,  $J = 7.2$  Hz), 7.88 (1H, s), 7.62-7.32 (6H, m); <sup>13</sup>C NMR (100 MHz, CDCl<sub>3</sub>)  $\delta$ : 158.34, 150.51, 150.34, 146.25, 145.67, 138.78, 129.21, 128.71, 126.86, 121.34, 119.70, 118.16;  $m/z$  HRMS (DART) found [M+H]<sup>+</sup> 233.1092, C<sub>16</sub>H<sub>13</sub>N<sub>2</sub><sup>+</sup> requires 233.1073.

## 2-(4-Bromophenyl)-3'-chloro-4,4'-bipyridine (4b)

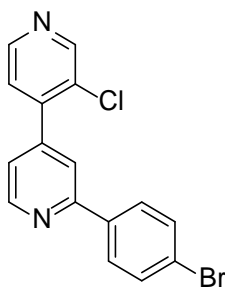

Prepared according to general procedure C using (2-(4-bromophenyl)pyridin-4-yl)(3-chloropyridin-4-yl)diphenylphosphonium trifluoromethanesulfonate (340 mg, 0.50 mmol), 4.0 M HCl in dioxanes (250  $\mu$ L, 1.00 mmol), and EtOH (1.25 mL). The reaction was heated to 80  $^{\circ}$ C for 17 hrs. Flash column chromatography (silica gel: 25% EtOAc in hexanes) afforded the title compound as a white solid (111 mg, 0.32 mmol, 64% yield). mp 153-154  $^{\circ}$ C; IR  $\nu_{\max}/\text{cm}^{-1}$  (film): 3053, 1603, 1579, 1552, 1461, 1412, 1376, 1111, 1006, 831, 741;  $^1\text{H}$  NMR (400 MHz,  $\text{CDCl}_3$ )  $\delta$ : 8.79 (1H, d,  $J = 5.0$  Hz), 8.74 (1H, s), 8.60 (1H, d,  $J = 4.9$  Hz), 7.91 (2H, d,  $J = 8.5$  Hz), 7.77 (1H, s), 7.61 (2H, d,  $J = 8.5$  Hz), 7.37-7.28 (2H, m);  $^{13}\text{C}$  NMR (100 MHz,  $\text{CDCl}_3$ )  $\delta$ : 156.61, 150.35, 149.96, 148.15, 145.03, 144.91, 137.56, 131.92, 129.72, 128.46, 124.53, 123.87, 122.03, 120.01;  $m/z$  HRMS (DART) found  $[\text{M}+\text{H}]^+$  344.9812,  $\text{C}_{16}\text{H}_{11}\text{BrN}_2^+$  requires 344.9789.

## Ethyl 2'-(4-bromophenyl)-2-butyl-[4,4'-bipyridine]-3-carboxylate (4c)

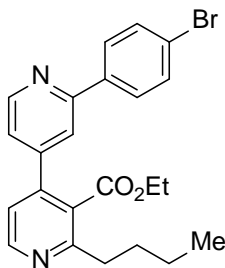

Prepared according to general procedure C using (2-(4-bromophenyl)pyridin-4-yl)(2-butyl-3-(ethoxycarbonyl)pyridin-4-yl)diphenylphosphonium trifluoromethanesulfonate (155 mg, 0.20 mmol), trifluoromethanesulfonic acid (36  $\mu$ L, 0.40 mmol) and EtOH (0.5 mL) at 80  $^{\circ}$ C for 14 hours. Flash column chromatography (silica gel: 16% EtOAc in hexanes to 33% EtOAc in hexanes) afforded the title compound as a colorless oil (67 mg, 0.15 mmol, 76% yield). IR  $\nu_{\max}/\text{cm}^{-1}$  (film): 3051, 2956, 2929, 2870, 1722, 1601, 1589, 1575, 1537, 1491, 1475, 1455, 1405, 1379, 1258, 1138, 1099, 1071, 1045, 1008, 825;  $^1\text{H}$  NMR (400 MHz,  $\text{CDCl}_3$ )  $\delta$ : 8.73 (1H, d,  $J = 5.0$  Hz), 8.68 (1H, d,  $J = 5.0$  Hz), 7.90 (2H, d,  $J = 8.3$  Hz), 7.71 (1H, s), 7.60 (2H, d,  $J = 8.3$  Hz), 7.26 (1H, d,  $J = 5.8$  Hz), 7.18 (1H, d,  $J = 5.0$  Hz), 4.11 (2H, q,  $J = 7.2$  Hz), 2.89 (2H, t,  $J = 7.8$  Hz), 1.76 (2H, qn,  $J = 7.6$  Hz), 1.42 (2H, sext,  $J = 7.4$  Hz), 1.00 (3H, t,  $J = 7.2$  Hz), 0.94 (3H, t,  $J = 7.4$  Hz);  $^{13}\text{C}$  NMR (100 MHz,  $\text{CDCl}_3$ )  $\delta$ : 167.97, 160.08, 156.52, 150.14, 149.95, 147.22, 145.26, 137.49, 131.99, 128.40, 127.85, 123.92, 121.29, 120.68, 119.21, 61.69, 36.02,



31.93, 22.66, 13.86, 13.60;  $m/z$  HRMS (DART) found  $[M+H]^+$  439.1029,  $C_{23}H_{23}BrN_2O_2^+$  requires 439.1021.

### 5-Chloro-3'-methoxy-2-methyl-4,4'-bipyridine (4d)

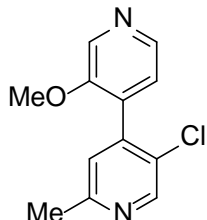

Prepared according to general procedure C using (5-chloro-2-methylpyridin-4-yl)(3-methoxypyridin-4-yl)diphenylphosphonium trifluoromethanesulfonate (285 mg, 0.50 mmol), trifluoromethanesulfonic acid (89  $\mu$ L, 1.00 mmol) and EtOH (1.25 mL) at 80 °C for 14 hours. Flash column chromatography (silica gel: 50% EtOAc in hexanes) afforded the title compound as a colorless crystalline solid (77 mg, 0.33 mmol, 65% yield). mp 105-108 °C; IR  $\nu_{max}/cm^{-1}$  (film): 3029, 2968, 2938, 2842, 1582, 1556, 1506, 1492, 1469, 1441, 1379, 1360, 1312, 1306, 1291, 1269, 1256, 1239, 1213, 1195, 1101, 1017, 846, 833;  $^1H$  NMR (400 MHz,  $CDCl_3$ )  $\delta$ : 8.52 (1H, s), 8.39 (1H, s), 8.33 (1H, d,  $J = 4.7$  Hz), 7.09 (1H, d,  $J = 4.7$  Hz), 7.05 (1H, s), 3.88 (3H, s), 2.54 (3H, s);  $^{13}C$  NMR (100 MHz,  $CDCl_3$ )  $\delta$ : 156.62, 152.18, 148.70, 142.83, 142.52, 134.21, 133.11, 128.01, 124.66, 124.11, 56.18, 23.74;  $m/z$  HRMS (DART) found  $[M+H]^+$  235.0664,  $C_{12}H_{12}ClN_2O^+$  requires 235.0638.

### 3-Chloro-3'-fluoro-4,4'-bipyridine (4e)

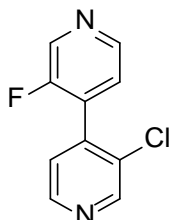

Prepared according to general procedure C using (3-chloropyridin-4-yl)(3-fluoropyridin-4-yl)diphenylphosphonium trifluoromethanesulfonate (136 mg, 0.25 mmol), 4.0M HCl in dioxane (125  $\mu$ L, 0.50 mmol) and EtOH (0.625 mL) at 80 °C for 23 hours. Flash column chromatography (silica gel: 40% EtOAc in hexanes to 50% EtOAc in hexanes) followed by flash column chromatography (neutral alumina: 20% EtOAc in hexanes to 40% EtOAc in hexanes) afforded the title compound as a white crystalline solid (34 mg, 0.16 mmol, 65% yield). mp 92-94 °C; IR  $\nu_{max}/cm^{-1}$  (film): 3021, 1578, 1470, 1413, 1398, 1268, 1217, 1202, 1176, 1110, 1027, 830, 752;  $^1H$  NMR (400 MHz,  $CDCl_3$ )  $\delta$ : 8.69 (1H, s), 8.60-8.44 (3H, m), 7.29-7.17 (2H, m);  $^{13}C$  NMR (100 MHz,  $CDCl_3$ )  $\delta$ : 155.86 (d,  $J = 259.5$  Hz), 150.15, 147.84, 145.81 (d,  $J = 5.4$  Hz), 139.81, 139.05 (d,  $J = 24.1$  Hz), 131.57 (d,  $J = 13.0$  Hz), 130.70, 124.97, 124.63;  $^{19}F$  NMR (365 MHz,  $CDCl_3$ )  $\delta$ : -128.06 (d,  $J = 5.5$  Hz);  $m/z$  LRMS (ESI + APCI) found  $[M+H]^+$  209.0,  $C_{10}H_7ClFN_2^+$  requires 209.0.

## 2'-((4-Bromo-3-fluorophenoxy)methyl)-2-butyl-5-(trifluoromethyl)-4,4'-bipyridine (4f)

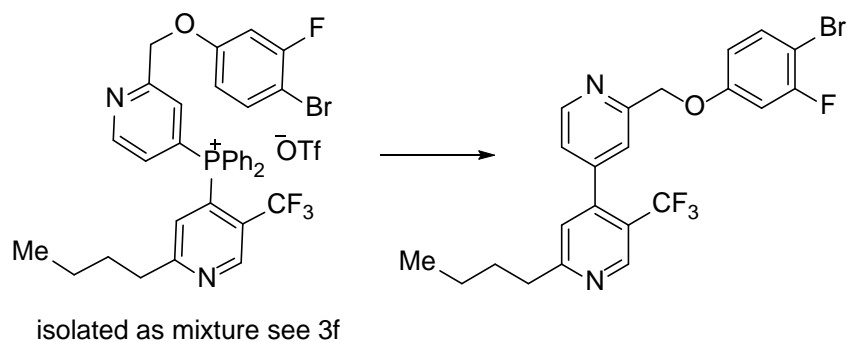

Prepared according to general procedure C using (2-((4-bromo-3-fluorophenoxy)methyl)pyridin-4-yl)(2-butyl-5-(trifluoromethyl)pyridin-4-yl)diphenylphosphonium trifluoromethanesulfonate (204 mg, isolated as a mixture see 3f), Trifluoromethanesulfonic acid (45  $\mu$ L, 0.50 mmol) and EtOH (0.625 mL) at 80  $^{\circ}$ C for 12 hours. Flash column chromatography (silica gel: 2% EtOAc in  $\text{CH}_2\text{Cl}_2$  to 5% EtOAc in  $\text{CH}_2\text{Cl}_2$ ) afforded the title compound as a white amorphous powder (63 mg, 0.13 mmol, 29% yield over two steps). mp 79-81  $^{\circ}$ C; IR  $\nu_{\text{max}}/\text{cm}^{-1}$  (film): 3027, 2958, 2924, 2875, 2860, 1597, 1589, 1564, 1539, 1492, 1467, 1452, 1426, 1415, 1380, 1323, 1292, 1268, 1249, 1189, 1177, 1153, 1130, 1101, 1089, 1057, 1032, 974, 942, 902, 855, 843, 820;  $^1\text{H}$  NMR (400 MHz,  $\text{CDCl}_3$ )  $\delta$ : 8.88 (1H, s), 8.68 (1H, d,  $J = 5.0$  Hz), 7.44-7.38 (2H, m), 7.22 (1H, d,  $J = 4.8$  Hz), 7.08 (1H, s), 6.78 (1H, dd,  $J = 10.2, 2.8$  Hz), 6.69 (1H, dd,  $J = 8.9, 2.8$  Hz), 5.22 (2H, s), 2.88 (2H, t,  $J = 7.7$  Hz), 1.74 (2H, qn,  $J = 7.3$  Hz), 1.40 (2H, sext,  $J = 7.5$  Hz), 0.94 (3H, t,  $J = 7.3$  Hz);  $^{13}\text{C}$  NMR (100 MHz,  $\text{CDCl}_3$ )  $\delta$ : 166.90, 159.44 (d,  $J = 245.7$  Hz), 158.68 (d,  $J = 9.7$  Hz), 156.50, 149.21, 147.06 (q,  $J = 5.5$  Hz), 146.29, 146.23 (q,  $J = 1.8$  Hz), 133.47 (d,  $J = 1.7$  Hz), 123.90, 123.50 (q,  $J = 272.3$  Hz), 122.27 (d,  $J = 1.1$  Hz), 121.38 (q,  $J = 30.6$  Hz), 120.59, 111.98 (d,  $J = 3.2$  Hz), 103.98 (d,  $J = 25.6$  Hz), 100.11 (d,  $J = 21.2$  Hz), 70.86, 37.99, 31.58, 22.44, 13.83;  $^{19}\text{F}$  NMR (365 MHz,  $\text{CDCl}_3$ )  $\delta$ : -56.55, -104.87 (t,  $J = 8.4$  Hz);  $m/z$  HRMS (DART) found  $[\text{M}+\text{H}]^+$  483.0690,  $\text{C}_{22}\text{H}_{20}\text{BrF}_4\text{N}_2\text{O}^+$  requires 483.0695.

## 2-(3-Fluoropyridin-4-yl)-4-methylquinoline (4g)

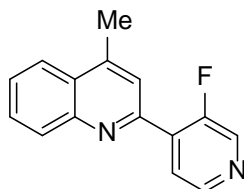

Prepared according to general procedure C, using (3-fluoropyridin-4-yl)(4-methylquinolin-2-yl)diphenylphosphonium trifluoromethanesulfonate (286 mg, 0.50 mmol), 4.0M HCl in dioxane (250  $\mu$ L, 1.00 mmol), and EtOH (1.25 mL) at 80  $^{\circ}$ C for 12 hours. The crude material was purified by flash chromatography (silica gel gradient elution: 25% EtOAc in hexanes to 50% EtOAc in hexanes) to provide the title compound as a white crystalline solid (68 mg, 0.31 mmol, 57% yield). mp 94-95  $^{\circ}$ C; IR  $\nu_{\text{max}}/\text{cm}^{-1}$  (film): 3038, 2968, 1464, 1350, 1277, 1235, 746;  $^1\text{H}$

NMR (400 MHz, CDCl<sub>3</sub>)  $\delta$ : 8.62 (1H, d,  $J$  = 2.8 Hz), 8.59 (1H, dd,  $J$  = 4.9, 0.9 Hz), 8.19 (1H, dd,  $J$  = 8.4, 0.5 Hz), 8.10 (1H, dd,  $J$  = 7.3, 5.0 Hz), 8.05 (1H, dd,  $J$  = 8.4, 0.9 Hz), 7.80-7.75 (2H, m), 7.66-7.62 (1H, m), 2.80 (3H, d,  $J$  = 0.8 Hz); <sup>13</sup>C NMR (100 MHz, CDCl<sub>3</sub>)  $\delta$ : 157.28 (d,  $J$  = 258.8 Hz); 158.84 (d,  $J$  = 2.0 Hz), 148.09, 146.25 (d,  $J$  = 5.1 Hz), 145.16, 139.33 (d,  $J$  = 26.1 Hz), 134.60 (d,  $J$  = 9.5 Hz), 130.50, 129.74, 127.79, 127.20, 124.58, 123.74, 122.69 (d,  $J$  = 8.2 Hz), 19.00; <sup>19</sup>F NMR (365 MHz, CDCl<sub>3</sub>)  $\delta$ : -131.61 (d,  $J$  = 7.5 Hz);  $m/z$  HRMS (DART) found [M+H]<sup>+</sup> 239.0973, C<sub>15</sub>H<sub>12</sub>FN<sub>2</sub><sup>+</sup> requires 239.0979.

#### Ethyl 2-(4-ethoxyquinolin-2-yl)isonicotinate (4h)

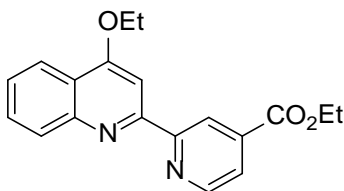

Prepared according to general procedure C, using (4-(ethoxycarbonyl)pyridin-2-yl)(4-ethoxyquinolin-2-yl)diphenylphosphonium trifluoromethanesulfonate (164 mg, 0.25 mmol), trifluoromethanesulfonic acid (42  $\mu$ L, 0.50 mmol), and EtOH (0.63 mL) at 80 °C for 12 hours. The crude material was purified by flash chromatography (silica gel: 10% EtOAc in hexanes to 25% EtOAc in hexanes) to provide the title compound as a white crystalline solid (38 mg, 0.12 mmol, 47% yield). mp 102-104 °C; IR  $\nu_{\text{max}}$ /cm<sup>-1</sup> (film): 3038, 2968, 1464, 1350, 1277, 1235, 746; <sup>1</sup>H NMR (400 MHz, CDCl<sub>3</sub>)  $\delta$ : 9.18 (1H, s), 8.84 (1H, d,  $J$  = 5.0 Hz), 8.26 (1H, dd,  $J$  = 3.16, 1.2 Hz), 8.15 (1H, d,  $J$  = 8.4 Hz), 7.97 (1H, s), 7.97 (1H, dd,  $J$  = 5.0, 1.6 Hz), 7.71-7.70 (1H, m), 7.56-7.49 (1H, m), 4.55-4.38 (4H, m), 1.62 (3H, t,  $J$  = 7.0 Hz), 1.47 (3H, t,  $J$  = 7.1 Hz); <sup>13</sup>C NMR (100 MHz, CDCl<sub>3</sub>)  $\delta$ : 165.36, 162.43, 157.71, 156.56, 149.59, 148.98, 138.80, 129.89, 129.35, 125.93, 123.05, 121.94, 121.54, 121.16, 98.12, 64.34, 61.83, 14.55, 14.29;  $m/z$  HRMS (DART) found [M+H]<sup>+</sup> 323.1386, C<sub>19</sub>H<sub>19</sub>N<sub>2</sub>O<sub>3</sub><sup>+</sup> requires 323.1390.

#### 7-Chloro-4-(3-fluorophenoxy)-4'-methyl-2,2'-biquinoline (4i)

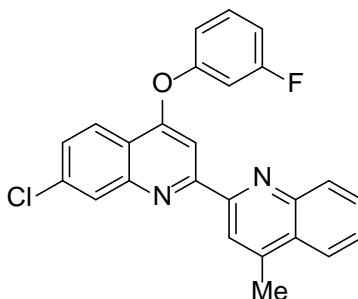

Prepared according to general procedure C, using (7-chloro-4-(3-fluorophenoxy)quinolin-2-yl)(4-methylquinolin-2-yl)diphenylphosphonium trifluoromethanesulfonate (187 mg, 0.25 mmol), trifluoromethanesulfonic acid (42  $\mu\text{L}$ , 0.50 mmol), and (2,2,2)-Trifluoroethanol (0.63 mL) at 80°C for 12 hours. The crude material was purified by flash chromatography (silica gel, 10% EtOAc in hexanes) to provide the title compound as a white crystalline solid (70 mg, 0.17 mmol, 67% yield). mp 208-210 °C; IR  $\nu_{\text{max}}/\text{cm}^{-1}$  (film): 3068, 1615, 1094, 947, 831, 755, 526;  $^1\text{H}$  NMR (400 MHz,  $\text{CDCl}_3$ )  $\delta$ : 8.60 (1H, d,  $J = 0.8$  Hz), 8.28 (1H, d,  $J = 8.9$  Hz), 8.25 (1H, d,  $J = 1.8$  Hz), 8.13 (1H, s), 8.07 (1H, dd,  $J = 8.4, 0.7$  Hz), 8.03 (1H, dd,  $J = 8.3, 0.9$  Hz), 7.69 (1H, m), 7.60-7.53 (2H, m), 7.47 (1H, td,  $J = 12.2, 7.5$  Hz), 7.10-6.99 (3H, m), 2.83 (3H, d,  $J = 0.9$  Hz);  $^{13}\text{C}$  NMR (100 MHz,  $\text{CDCl}_3$ )  $\delta$ : 163.60 (d,  $J = 248.4$  Hz), 161.43, 158.99, 155.76 (d,  $J = 10.6$  Hz), 154.93, 150.04, 147.57, 145.07, 136.33, 131.10, (d,  $J = 9.6$  Hz), 130.50, 129.22, 128.57, 128.54, 127.50, 126.90, 123.75, 123.26, 120.13, 119.70, 116.32 (d,  $J = 3.4$  Hz), 112.44 (d,  $J = 21.1$  Hz), 108.65 (d,  $J = 24.2$  Hz), 108.65 (d,  $J = 24.2$  Hz), 103.43, 18.95;  $^{19}\text{F}$  NMR (365 MHz,  $\text{CDCl}_3$ )  $\delta$ : -109.72(-)109.79 (m);  $m/z$  HRMS (DART) found  $[\text{M}+\text{H}]^+$  415.1024,  $\text{C}_{25}\text{H}_{17}\text{ClFN}_2\text{O}^+$  requires 415.1008.

#### 4-Methyl-2-(2-(propylthio)pyrimidin-4-yl)quinoline (4j)

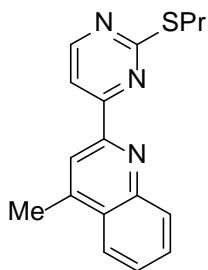

Prepared according to general procedure C using (4-Methylquinolin-2-yl)diphenyl(2-(propylthio)pyrimidin-4-yl)phosphonium trifluoromethanesulfonate (149 mg, 0.25 mmol), trifluoromethanesulfonic acid (44  $\mu\text{L}$ , 0.50 mmol), and EtOH (0.63 mL). The reaction was heated to 80 °C for 5.5 hours. Flash column chromatography (silica gel: 5% EtOAc in hexanes) followed by a second flash column (silica gel, gradient elution: 3% EtOAc in hexanes to 5% EtOAc in hexanes) afforded the title compound as a white solid (27 mg, 0.091 mmol, 37% yield). mp 57-58 °C; IR  $\nu_{\text{max}}/\text{cm}^{-1}$  (film): 2925, 1557, 1539, 1505, 1417, 1352, 1317, 1194, 1160,

782;  $^1\text{H}$  NMR (400 MHz,  $\text{CDCl}_3$ )  $\delta$ : 8.67 (1H, d,  $J = 4.7$  Hz), 8.40 (1H, s), 8.23 (1H, d,  $J = 4.7$  Hz), 8.17 (1H, d,  $J = 8.1$  Hz), 8.03 (1H, d,  $J = 8.1$  Hz), 7.75 (1H, t,  $J = 7.0$  Hz), 7.61 (1H, t,  $J = 7.0$  Hz), 3.26 (2H, t,  $J = 7.1$  Hz), 2.80 (3H, s), 1.88 (2H, sext,  $J = 7.1$  Hz), 1.13 (3H, t,  $J = 7.1$  Hz);  $^{13}\text{C}$  NMR (100 MHz,  $\text{CDCl}_3$ )  $\delta$ : 172.21, 163.22, 158.12, 153.22, 147.70, 145.37, 130.61, 129.53, 128.96, 127.37, 123.80, 119.29, 112.97, 33.04, 22.72, 19.02, 13.62;  $m/z$  LRMS (ESI + APCI) found  $[\text{M} + \text{H}]^+$  296.2,  $\text{C}_{17}\text{H}_{18}\text{N}_3\text{S}^+$  requires 296.1.

#### 2-(5,6-Dimethylpyrazin-2-yl)-4-ethoxyquinoline (4k)

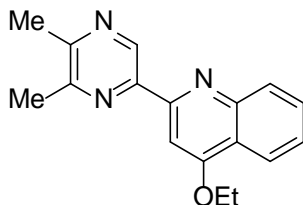

Prepared according to general procedure C using (5,6-dimethylpyrazin-2-yl)(4-ethoxyquinolin-2-yl)diphenylphosphonium trifluoromethanesulfonate (154 mg, 0.25 mmol), trifluoromethanesulfonic acid (67  $\mu\text{L}$ , 0.75 mmol) and EtOH (625  $\mu\text{L}$ ) at 100  $^\circ\text{C}$  for 14 hours. Flash column chromatography (silica gel: 33% EtOAc in hexanes) afforded the title compound as a gray amorphous powder (16 mg, 0.06 mmol, 23% yield). mp 189-191  $^\circ\text{C}$ ; IR  $\nu_{\text{max}}/\text{cm}^{-1}$  (film): 3080, 2999, 2977, 2919, 1615, 1586, 1500, 1472, 1460, 1445, 1420, 1402, 1376, 1359, 1347, 1273, 1249, 1232, 1185, 1156, 1114, 1105, 1089, 1027, 993, 953, 919, 861, 837, 818, 784, 777, 767;  $^1\text{H}$  NMR (400 MHz,  $\text{CDCl}_3$ )  $\delta$ : 9.52 (1H, s), 8.24 (1H, d,  $J = 8.2$  Hz), 8.10 (1H, d,  $J = 8.4$  Hz), 7.86 (1H, s), 7.71 (1H, dd,  $J = 7.2, 7.1$  Hz), 7.50 (1H, dd,  $J = 7.8, 7.3$  Hz), 4.42 (2H, q,  $J = 7.0$  Hz), 2.64 (3H, s), 2.62 (3H, s), 1.61 (3H, t,  $J = 7.0$  Hz);  $^{13}\text{C}$  NMR (100 MHz,  $\text{CDCl}_3$ )  $\delta$ : 162.28, 156.03, 152.39, 150.85, 149.00, 148.17, 140.21, 129.87, 129.28, 125.77, 121.89, 121.37, 97.86, 64.26, 22.23, 22.02, 14.55;  $m/z$  LRMS (DART) found  $[\text{M} + \text{H}]^+$  280.2,  $\text{C}_{17}\text{H}_{18}\text{N}_3\text{O}^+$  requires 280.1.

**Ethyl 4-((*S*)-(4-chlorophenyl)(3'-(((*R*)-1-(3-fluoro-4-(trifluoromethyl)benzyl)pyrrolidin-2-yl)methoxy)-[4,4'-bipyridin]-2-yl)methoxy)piperidine-1-carboxylate (4l)**

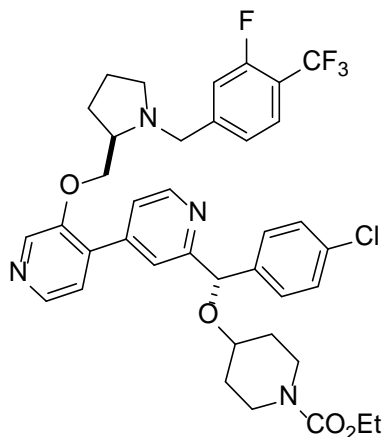

Prepared according to general procedure C, using (2-((*S*)-(4-chlorophenyl)((1-(ethoxycarbonyl)piperidin-4-yl)oxy)methyl)pyridin-4-yl)(3-(((*R*)-1-(3-fluoro-4-(trifluoromethyl)benzyl)pyrrolidin-2-yl)methoxy)pyridin-4-yl)diphenylphosphonium trifluoromethanesulfonate (106 mg, 0.10 mmol), trifluoromethanesulfonic acid (25  $\mu$ L, 0.30 mmol), and EtOH (0.25 mL) at 80  $^{\circ}$ C for 72 hours. The crude material was purified by flash chromatography (silica gel: 2% MeOH in  $\text{CH}_2\text{Cl}_2$ ) followed by a second flash chromatography column (silica gel: 2% MeOH in  $\text{CH}_2\text{Cl}_2$ ) to provide the title compound as a faint brown oil (43 mg, 0.06 mmol, 60% yield). IR  $\nu_{\text{max}}/\text{cm}^{-1}$  (film): 3055, 2928, 2872, 1689, 1629, 1604, 1586, 1564, 1502, 964, 766, 645, 619, 534;  $^1\text{H}$  NMR (400 MHz,  $\text{CDCl}_3$ )  $\delta$ : 8.40 (1H, d,  $J = 5.5$  Hz), 8.35-8.25 (2H, m), 7.62 (1H, s), 7.40-7.34 (1H, s), 7.40-7.34 (3H, m), 7.24 (1H, t,  $J = 1.7$  Hz), 7.22 (2H, m), 6.93-6.85 (2H, m), 5.60 (1H, s), 4.05 (2H, q,  $J = 7.1$  Hz), 3.95 (2H, d,  $J = 5.4$  Hz), 3.79-3.62 (3H, m), 3.57 (1H, m), 3.17-3.04 (3H, m), 2.86-2.72 (2H, m), 2.10 (1H, q,  $J = 8.4$  Hz), 1.96-1.47 (5H, m), 1.25-1.12 (6H, m);  $^{13}\text{C}$  NMR (100 MHz,  $\text{CDCl}_3$ )  $\delta$ : 161.94, 159.72 (dq,  $J = 255.5, 2.3$  Hz), 155.47, 151.76 (m), 148.82, 147.49 (d,  $J = 7.2$  Hz), 144.64, 143.16, 140.14, 135.40, 134.77, 133.47, 128.65, 128.08, 126.75 (2C, m), 122.64 (dq,  $J = 270.5, 1.1$  Hz), 123.86 (m), 123.22 (d,  $J = 3.4$  Hz), 122.58, 116.09 (d,  $J = 20.7$  Hz), 72.80, 62.61, 61.28, 58.75, 54.74, 41.07, 40.99, 31.16, 31.01, 29.67, 28.59, 23.26, 14.66;  $^{19}\text{F}$  NMR  $\delta$ : -61.13 (d,  $J = 12.8$  Hz), -114.89-(-)115.21 (m);  $m/z$  HRMS (DART) found  $[\text{M}+\text{H}]^+$  727.2688,  $\text{C}_{38}\text{H}_{40}\text{ClF}_4\text{N}_4\text{O}_4^+$  requires 727.2669.

**Ethyl (S)-4-((4-chlorophenyl)(3'-(3-fluoro-5-(6-methylpyridin-2-yl)phenyl)-[4,4'-bipyridin]-2-yl)methoxy)piperidine-1-carboxylate (4m)**

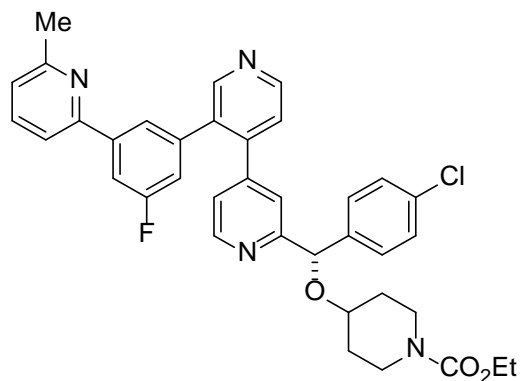

Prepared according to general procedure C using (S)-2-((4-chlorophenyl)((1-(ethoxycarbonyl)piperidin-4-yl)oxy)methyl)pyridin-4-yl)(3-(3-fluoro-5-(6-methylpyridin-2-yl)phenyl)pyridin-4-yl)diphenylphosphonium trifluoromethanesulfonate (97 mg, 0.10 mmol), trifluoromethanesulfonic acid (26.5  $\mu$ L, 0.30 mmol), and EtOH (0.25 mL). The reaction was heated to 80  $^{\circ}$ C for 26 hours. Flash column chromatography (the crude reaction mixture was dissolved in 5 mL of  $\text{CH}_2\text{Cl}_2$  and then 1 mL of trifluoroacetic acid was added, the mixture was loaded onto a silica column and then gradient elution:  $\text{CH}_2\text{Cl}_2$  to 3% MeOH in  $\text{CH}_2\text{Cl}_2$ ) followed by a second flash column (the crude reaction mixture was dissolved in 5 mL of  $\text{CH}_2\text{Cl}_2$  and then 1 mL of trifluoroacetic acid was added, the mixture was loaded onto a silica column and then gradient elution:  $\text{CH}_2\text{Cl}_2$  to 2% MeOH in  $\text{CH}_2\text{Cl}_2$ ) followed by preparatory thin layer chromatography (silica gel: 3% MeOH in  $\text{CH}_2\text{Cl}_2$  afforded the title compound as a colorless oil (41 mg, 0.07 mmol, 65% yield). IR  $\nu_{\text{max}}/\text{cm}^{-1}$  (film): 3060, 2953, 2925, 1690, 1585, 1576, 1432, 1384, 1228, 1087, 751;  $^1\text{H}$  NMR (400 MHz,  $\text{CDCl}_3$ )  $\delta$ : 8.74 (2H, br s), 8.54 (1H, d,  $J = 5.0$  Hz), 7.69 (1H, d,  $J = 9.9$  Hz), 7.60-7.50 (2H, m), 7.35 (1H, d,  $J = 4.2$  Hz), 7.24-7.15 (3H, m), 7.13-7.04 (5H, m), 6.84 (1H, d,  $J = 8.7$  Hz), 5.47 (1H, s), 4.09 (2H, q,  $J = 7.2$  Hz), 3.63-3.49 (2H, m), 3.49-3.38 (1H, m), 3.16-3.03 (2H, m), 2.58 (3H, s), 1.72-1.55 (2H, m), 1.54-1.36 (2H, m), 1.23 (3H, t,  $J = 7.2$  Hz);  $^{13}\text{C}$  NMR (100 MHz,  $\text{CDCl}_3$ )  $\delta$ : 162.95 (d,  $J = 246.7$  Hz), 161.95, 158.64, 155.38, 154.23 (d,  $J = 2.9$  Hz), 151.02, 149.66-149.29 (2C, m), 147.16, 145.05, 142.20 (d,  $J = 7.8$  Hz), 139.54, 138.93 (d,  $J = 8.3$  Hz), 136.94, 134.56, 133.30, 128.52, 127.81, 124.11-123.81 (2C, m), 122.47, 122.44, 120.99, 117.20, 116.54 (d,  $J = 22.6$  Hz), 113.28 (d,  $J = 22.7$  Hz), 80.38, 72.19, 61.19, 40.78, 40.72, 30.88, 30.68, 24.62, 14.66;  $^{19}\text{F}$  NMR (365 MHz,  $\text{CDCl}_3$ )  $\delta$ : -112.23;  $m/z$  HRMS (ESI) found  $[\text{M}+\text{H}]^+$  637.2391,  $\text{C}_{37}\text{H}_{35}\text{ClFN}_4\text{O}_3^+$  requires 637.2376.

**(2*R*, 6*S*)-4-((2-(3-(3-fluoro-5-(6-methylpyridin-2-yl)phenyl)pyridin-4-yl)quinolin-4-yl)methyl)-2,6-dimethylmorpholine (4n)**

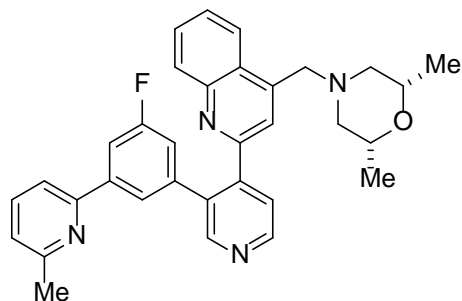

Prepared according to general procedure C (except an additional 18  $\mu\text{L}$ , 0.20 mmol of trifluoromethanesulfonic acid was added after 40.5 hours) using (4-(((2*R*, 6*S*)-2,6-dimethylmorpholino)methyl)quinolin-2-yl)(3-(3-fluoro-5-(6-methylpyridin-2-yl)phenyl)pyridin-4-yl)diphenylphosphonium trifluoromethanesulfonate (85 mg, 0.10 mmol), trifluoromethanesulfonic acid (35  $\mu\text{L}$ , 0.40 mmol), and EtOH (0.25 mL). The reaction was heated to 80  $^{\circ}\text{C}$  for 58.5 hours. Flash column chromatography (silica gel: 60% EtOAc in hexanes) followed by a second flash column (silica gel, gradient elution: 1% MeOH in  $\text{CH}_2\text{Cl}_2$  to 2.5% MeOH in  $\text{CH}_2\text{Cl}_2$ ) afforded the title compound as a colorless oil (23.7 mg, 0.046 mmol, 46%). IR  $\nu_{\text{max}}/\text{cm}^{-1}$  (film): 3063, 2972, 2928, 1586, 1455, 1430, 1344, 1083, 757;  $^1\text{H}$  NMR (400 MHz,  $\text{CDCl}_3$ )  $\delta$ : 8.81 (2H, br s), 8.27-8.15 (2H, m), 7.85-7.73 (3H, m), 7.68 (1H, d,  $J = 9.9$  Hz), 7.58 (1H, t,  $J = 7.6$  Hz), 7.51 (1H, t,  $J = 7.7$  Hz), 7.23 (1H, d,  $J = 7.7$  Hz), 7.15-7.03 (2H, m), 6.92 (1H, d,  $J = 9.0$  Hz), 3.63 (2H, s), 3.54-3.38 (2H, m), 2.50 (3H, s), 2.40 (2H, d,  $J = 11.5$  Hz), 1.63 (2H, t,  $J = 10.5$  Hz), 1.00 (6H, d,  $J = 6.3$  Hz)  $^{13}\text{C}$  NMR (100 MHz,  $\text{CDCl}_3$ )  $\delta$ : 162.86 (d,  $J = 246.4$ ), 158.62, 156.36, 154.36 (d,  $J = 2.7$  Hz), 150.76, 149.56, 148.57, 146.77, 143.77, 142.18 (d,  $J = 8.6$  Hz), 139.74 (d,  $J = 8.2$  Hz), 136.94, 134.58, 130.19, 129.63, 126.87, 126.64, 124.68, 124.24, 123.95 (d,  $J = 2.7$  Hz), 122.63, 122.40, 117.22, 116.79 (d,  $J = 22.5$  Hz), 113.16 (d,  $J = 22.7$  Hz), 71.51, 59.81, 59.38, 24.51, 18.83;  $^{19}\text{F}$  NMR (365 MHz,  $\text{CDCl}_3$ )  $\delta$ : -112.28 (t,  $J = 9.3$  Hz);  $m/z$  HRMS (ESI) found  $[\text{M}+\text{H}]^+$  519.2572,  $\text{C}_{33}\text{H}_{32}\text{FN}_4\text{O}^+$  requires 519.2555.



(2*S*, 6*R*)-4-((2-(3-(((*R*)-1-(3-Fluoro-4-(trifluoromethyl)benzyl)pyrrolidin-2-yl)methoxy)pyridin-4-yl)quinolin-4-yl)methyl)-2,6-dimethylmorpholine (4o)

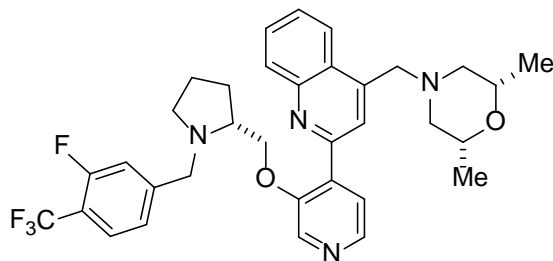

Prepared according to general procedure C, using (4-(((2*S*, 6*R*)-2,6-dimethylmorpholino)methyl)quinolin-2-yl)(3-(((*R*)-1-(3-fluoro-4-(trifluoromethyl)benzyl)pyrrolidin-2-yl)methoxy)pyridin-4-yl)diphenylphosphonium trifluoromethanesulfonate (94 mg, 0.10 mmol), 4.0M HCl in dioxane (100  $\mu$ L, 0.40 mmol), and EtOH (0.25 mL) at 80  $^{\circ}$ C for 72 hours. The crude material was purified by flash chromatography (silica gel: 2% MeOH in CH<sub>2</sub>Cl<sub>2</sub>) to provide the title compound as a brown amorphous solid (30 mg, 0.05 mmol, 49% yield). IR  $\nu_{\text{max}}/\text{cm}^{-1}$  (film): 3063, 2971, 2930, 2871, 2813, 1629, 1587, 1545, 693, 653, 602, 550, 531, 526; <sup>1</sup>H NMR (400 MHz, CDCl<sub>3</sub>)  $\delta$ : 8.50-8.39 (2H, m), 8.23 (1H, d,  $J$  = 8.3 Hz), 8.11 (1H, d,  $J$  = 8.4 Hz), 7.85 (1H, s), 7.75 (1H, d,  $J$  = 4.8 Hz), 7.71 (1H, m), 7.56 (1H, m), 7.29 (1H, t,  $J$  = 7.7 Hz), 6.97-6.87 (2H, m), 4.21-4.06 (2H, m), 4.01 (1H, d,  $J$  = 14.16 Hz), 3.80 (2H, d,  $J$  = 1.8 Hz), 3.73-3.61 (2H, m), 3.30 (1H, d,  $J$  = 14.2 Hz), 3.08-2.97 (1H, m), 2.91-2.80 (1H, m), 2.79 (2H, d,  $J$  = 11.5 Hz), 2.15 (1H, q,  $J$  = 6.2 Hz), 2.06-1.94 (1H, m), 1.86 (2H, q,  $J$  = 10.6 Hz), 1.78-1.65 (3H, m), 1.14 (6H, d,  $J$  = 6.2 Hz); <sup>13</sup>C NMR (100 MHz, CDCl<sub>3</sub>)  $\delta$ : 159.57 (dq,  $J$  = 253.8, 2.1 Hz), 154.01, 152.42, 148.39, 147.22 (d,  $J$  = 5.5 Hz), 143.38, 143.23, 136.59, 135.72, 130.16, 129.47, 126.94-126.32 (m, 4C), 124.75, 124.17, 123.30 (d,  $J$  = 3.3 Hz), 122.97, 122.62 (dq,  $J$  = 273.1, 1.0 Hz), 116.89 (d,  $J$  = 20.6 Hz), 73.11, 71.67 (d,  $J$  = 2.2 Hz), 62.43, 60.13, 59.69 (d,  $J$  = 8.4 Hz), 58.86, 54.66, 28.60, 23.29, 19.88 (d,  $J$  = 1.1 Hz); <sup>19</sup>F NMR  $\delta$ : -61.10 (d,  $J$  = 12.9 Hz), -114.67-(-)115.23 (m);  $m/z$  HRMS (DART) found [M+H]<sup>+</sup> 609.2839, C<sub>34</sub>H<sub>37</sub>F<sub>4</sub>N<sub>4</sub>O<sub>2</sub><sup>+</sup> requires 609.2847.

### 3-(4-Chlorophenyl)-N,N-dimethyl-3-(2'-phenyl-[4,4'-bipyridin]-2-yl)propan-1-amine (4p)

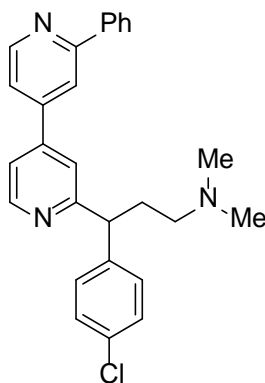

Prepared according to general procedure C using (2-(1-(4-chlorophenyl)-3-(dimethylamino)propyl)pyridin-4-yl)diphenyl(2-phenylpyridin-4-yl)phosphonium trifluoromethanesulfonate (381 mg, 0.50 mmol), trifluoromethanesulfonic acid (134  $\mu$ L, 1.50 mmol) and EtOH (1.25 mL) at 80  $^{\circ}$ C for 12 hours. Flash column chromatography (silica gel: 9% MeOH in  $\text{CH}_2\text{Cl}_2$ ) afforded the title compound as a light yellow oil (179 mg, 0.42 mmol, 84% yield). IR  $\nu_{\text{max}}/\text{cm}^{-1}$  (film): 3410, 3027, 2940, 2856, 2815, 2766, 2430, 2203, 1590, 1533, 1488, 1467, 1445, 1379, 1261, 1089, 1025, 1014, 907, 829, 775, 756, 727, 694;  $^1\text{H}$  NMR (400 MHz,  $\text{CDCl}_3$ )  $\delta$ : 8.74 (1H, d,  $J = 4.9$  Hz), 8.68 (1H, d,  $J = 4.9$  Hz), 8.01 (2H, d,  $J = 7.4$  Hz), 7.87 (1H, s), 7.49–7.33 (8H, m), 7.25 (2H, d,  $J = 8.6$  Hz), 4.29 (1H, t,  $J = 7.4$  Hz), 2.70–2.34 (10H, m);  $^{13}\text{C}$  NMR (100 MHz,  $\text{CDCl}_3$ )  $\delta$ : 163.01, 158.27, 150.26, 150.06, 146.48, 146.27, 141.11, 138.76, 132.47, 129.21, 129.15, 128.66, 126.88, 120.96, 119.79, 119.49, 118.23, 56.90, 49.98, 44.25, 31.30;  $m/z$  HRMS (DART) found  $[\text{M}+\text{H}]^+$  428.1921,  $\text{C}_{27}\text{H}_{27}\text{ClN}_3^+$  requires 428.1894.

### Ethyl 4-(4-(2-(4-bromophenyl)pyridin-4-yl)-8-chloro-5,6-dihydro-11H-benzo[5,6]cyclohepta[1,2-b]pyridin-11-ylidene)piperidine-1-carboxylate (4q)

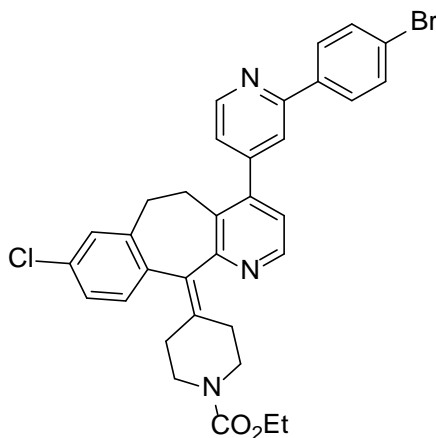

Prepared according to general procedure C using (2-(4-bromophenyl)pyridin-4-yl)(8-chloro-11-(1-(ethoxycarbonyl)piperidin-4-ylidene)-6,11-dihydro-5H-benzo[5,6]cyclohepta[1,2-b]pyridin-4-yl)diphenylphosphonium trifluoromethanesulfonate (237 mg, 0.25 mmol), trifluoromethanesulfonic acid (44  $\mu$ L, 0.50 mmol), and EtOH (625  $\mu$ L). The reaction was

heated to 80 °C for 30 hrs. Flash column chromatography (basic alumina, gradient elution: 20% EtOAc in hexanes to 40% EtOAc in hexanes) afforded the title compound as a white solid (133 mg, 0.22 mmol, 87% yield). mp 95-98 °C; IR  $\nu_{\max}/\text{cm}^{-1}$  (film): 3050, 2972, 2922, 1690, 1578, 1473, 1428, 1222, 1008, 826, 729;  $^1\text{H}$  NMR (400 MHz,  $\text{CDCl}_3$ )  $\delta$ : 8.77 (1H, d,  $J = 5.0$  Hz), 8.49 (1H, d,  $J = 5.0$  Hz), 7.91 (2H, d,  $J = 8.6$  Hz), 7.66-7.58 (3H, m), 7.21-7.14 (3H, m), 7.12 (1H, s), 7.06 (1H, d,  $J = 5.0$  Hz), 4.14 (2H, q,  $J = 7.2$  Hz), 3.82 (2H, br s), 3.41-3.29 (1H, m), 3.27-3.12 (3H, m), 2.88-2.72 (2H, m), 2.56-2.35 (3H, m), 2.34-2.20 (1H, m), 1.26 (3H, t,  $J = 7.2$  Hz);  $^{13}\text{C}$  NMR (100 MHz,  $\text{CDCl}_3$ )  $\delta$ : 159.73, 156.58, 155.34, 149.87, 147.81, 147.09, 146.77, 138.50, 137.53, 137.34, 135.89, 134.11, 133.01, 131.90, 131.21, 130.30, 129.60, 128.41, 126.07, 123.84, 122.53, 121.87, 119.70, 61.24, 44.69, 44.57, 32.12, 30.60, 30.51, 27.48, 14.48;  $m/z$  HRMS (DART) found  $[\text{M}+\text{H}]^+$  614.1235,  $\text{C}_{33}\text{H}_{30}\text{BrClN}_3\text{O}_2^+$  requires 614.1204.

**2-Chloro-N-(4-chloro-3-(4-(4-methylquinolin-2-yl)pyridin-2-yl)phenyl)-4-(methylsulfonyl)benzamide (4r)**

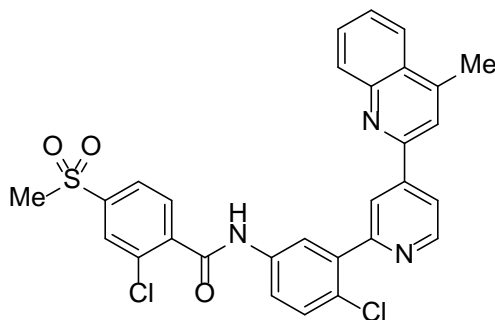

Prepared according to general procedure C using (2-(2-chloro-5-(2-chloro-4-(methylsulfonyl)benzamido)phenyl)pyridin-4-yl)(4-methylquinolin-2-yl)diphenylphosphonium trifluoromethanesulfonate (224 mg, 0.25 mmol), 4.0 M HCl in dioxanes (125  $\mu\text{L}$ , 0.50 mmol), and (2,2,2)-Trifluoroethanol (625  $\mu\text{L}$ ). The reaction was heated to 80 °C for 37 hours. Flash column chromatography (silica gel was packed in hexanes and neutralized with  $\text{NEt}_3$  then gradient elution:  $\text{CH}_2\text{Cl}_2$  to 1.5% MeOH in  $\text{CH}_2\text{Cl}_2$ ) followed by a second flash column (basic alumina, gradient elution:  $\text{CH}_2\text{Cl}_2$  to 2% MeOH in  $\text{CH}_2\text{Cl}_2$ ) and the resulting solid was washed on a frit with 200 mL of  $\text{Et}_2\text{O}$  and then 25 mL of chilled  $\text{CH}_2\text{Cl}_2$  (0 °C). The title compound was isolated as a white solid (73 mg, 0.13 mmol, 52% yield). decomp. 270-275 °C; IR  $\nu_{\max}/\text{cm}^{-1}$  (film): 3318, 3018, 2992, 2914, 1689, 1539, 1299, 1152, 1030, 816, 751;  $^1\text{H}$  NMR (400 MHz,  $\text{CDCl}_3$ )  $\delta$ : 10.99, (1H, s), 8.89 (1H, d,  $J = 5.2$  Hz), 8.28 (1H, d,  $J = 5.2$  Hz), 8.21 (1H, s), 8.18-8.07 (4H, m), 8.02 (1H, dd,  $J = 8.0, 1.5$  Hz), 7.94 (1H, d,  $J = 8.0$  Hz), 7.87-7.76 (2H, m), 7.72-7.59 (2H, m), 3.36 (3H, s), 2.79 (3H, s);  $^{13}\text{C}$  NMR (100 MHz,  $\text{CDCl}_3$ )  $\delta$ : 163.87, 156.84, 152.95, 150.28, 147.31, 146.12, 146.03, 143.13, 140.84, 139.31, 137.65, 130.97, 130.44, 130.08-129.82 (3C, m), 128.10, 127.60, 127.16, 125.99, 125.91, 124.21, 122.35, 121.81, 125.99, 125.91, 124.21, 122.35, 121.81, 121.07, 120.42, 119.31, 43.09, 18.39;  $m/z$  HRMS (ESI + APCI) found  $[\text{M}+\text{H}]^+$  562.0766,  $\text{C}_{29}\text{H}_{22}\text{Cl}_2\text{N}_3\text{O}_3\text{S}^+$  requires 562.0753.

### 5,7-Dichloro-4'-ethoxy-4-(4-fluorophenoxy)-2,2'-biquinoline (4s)

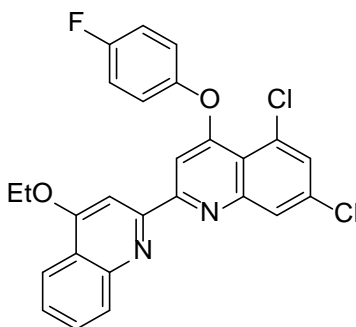

Prepared according to general procedure C, using (5,7-dichloro-4-(4-fluorophenoxy)quinolin-2-yl)(4-ethoxyquinolin-2-yl)diphenylphosphonium trifluoromethanesulfonate (203 mg, 0.25 mmol), trifluoromethanesulfonic acid (42  $\mu$ L, 0.50 mmol), and (2,2,2)-Trifluoroethanol (625  $\mu$ L) at 80  $^{\circ}$ C for 36 hours. The crude material was suspended in a 5 mL  $\text{CH}_2\text{Cl}_2$  and filtered over a frit with cold  $\text{CH}_2\text{Cl}_2$  to provide the title compound as a white crystalline solid (69 mg, 0.15 mmol, 58% yield). mp 235-238  $^{\circ}$ C; IR  $\nu_{\text{max}}/\text{cm}^{-1}$  (film): 3065, 2978, 1430, 1296, 1214, 1117, 733;  $^1\text{H}$  NMR (400 MHz,  $\text{CDCl}_3$ )  $\delta$ : 8.24 (1H, d,  $J$  = 8.2 Hz), 8.19-8.12 (2H, m), 8.10 (1H, s), 7.97 (1H, d,  $J$  = 8.4 Hz), 7.67 (1H, t,  $J$  = 7.3 Hz), 7.60 (1H, d,  $J$  = 1.8 Hz), 7.51 (1H, t,  $J$  = 15.0 Hz), 7.24 (4H, m), 4.47 (2H, q,  $J$  = 7.0 Hz), 1.64 (3H, t,  $J$  = 7.0 Hz);  $^{13}\text{C}$  NMR (100 MHz,  $\text{CDCl}_3$ )  $\delta$ : 162.60, 162.32, 159.93 (d,  $J$  = 243.8 Hz), 158.99, 155.89, 151.37, 150.39 (d,  $J$  = 2.7 Hz), 148.69, 134.94, 130.24, 129.86, 129.67, 129.42, 128.18, 126.26, 122.87 (d,  $J$  = 8.5 Hz), 121.94, 121.77, 118.42, 116.98 (d,  $J$  = 23.6 Hz), 105.31, 98.17, 64.38, 14.55;  $^{19}\text{F}$  NMR  $\delta$ : -117.56 (m);  $m/z$  HRMS (DART) found  $[\text{M}+\text{H}]^+$  479.0709,  $\text{C}_{26}\text{H}_{18}\text{Cl}_2\text{FN}_2\text{O}_2^+$  requires 479.0724.

### 2-(5-Chloro-6'-methyl-3-(4-(methylsulfonyl)phenyl)-[2,3'-bipyridin]-4'-yl)-4-methylquinoline (4t)

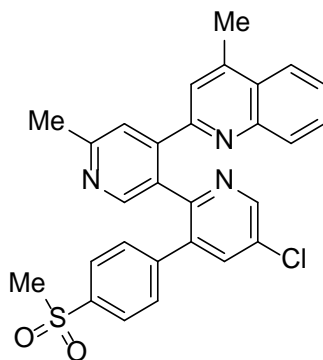

Prepared according to general procedure C, using (5-chloro-6'-methyl-3-(4-(methylsulfonyl)phenyl)-[2,3'-bipyridin]-4'-yl)(4-methylquinolin-2-yl)diphenylphosphonium trifluoromethanesulfonate (83 mg, 0.10 mmol), trifluoromethanesulfonic acid (26  $\mu$ L, 0.30 mmol), and EtOH (0.25 mL) at 80  $^{\circ}$ C for 22 hours. The crude material was purified by flash

chromatography (silica gel gradient elution: 3% MeOH in CH<sub>2</sub>Cl<sub>2</sub> to 4% MeOH in CH<sub>2</sub>Cl<sub>2</sub>) to provide the title compound as a white crystalline solid (40 mg, 0.08 mmol, 80% yield). mp 286-290 °C; IR  $\nu_{\max}/\text{cm}^{-1}$  (film): 3034, 2926, 1506, 1264, 1034, 873, 863; <sup>1</sup>H NMR (400 MHz, CDCl<sub>3</sub>)  $\delta$ : 8.69-8.59 (2H, m), 7.96 (1H, d,  $J$  = 8.0 Hz), 7.68-7.43 (6H, m), 7.35 (1H, s), 6.94-6.81 (3H, m), 3.00 (3H, s), 2.67 (3H, s), 2.61 (3H, s); <sup>13</sup>C NMR (100 MHz, CDCl<sub>3</sub>)  $\delta$ : 159.16, 154.96, 154.07, 151.54, 147.94, 147.32, 147.11, 145.21, 143.07, 139.47, 136.47, 136.03, 130.77, 130.59, 130.02, 129.61, 129.56, 127.08, 126.92, 126.75, 123.57, 122.81, 120.92, 44.39, 24.42, 18.78;  $m/z$  HRMS (DART) found  $[M+H]^+$  500.1175, C<sub>28</sub>H<sub>23</sub>ClN<sub>3</sub>O<sub>2</sub>S<sup>+</sup> requires 500.1194.

***N*-(4-Methyl-3-((4-(4-(4-methylquinolin-2-yl)pyridin-3-yl)pyrimidin-2-yl)amino)phenyl)-4-((4-methylpiperazin-1-yl)methyl)benzamide (4u)**

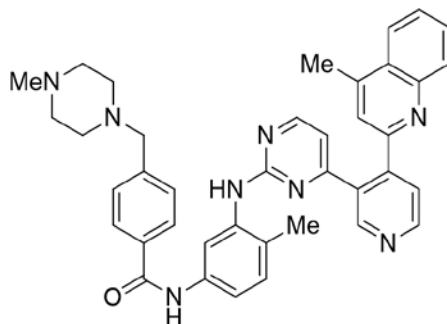

Prepared according to general procedure C using (3-(2-((2-methyl-5-(4-((4-methylpiperazin-1-yl)methyl)benzamido)phenyl)amino)pyrimidin-4-yl)pyridin-4-yl)(4-methylquinolin-2-yl)diphenylphosphonium trifluoromethanesulfonate (97 mg, 0.10 mmol), trifluoromethanesulfonic acid (36  $\mu$ L, 0.40 mmol) and EtOH (0.25 mL) at 80 °C for 48 hours. Flash column chromatography by three times (silica gel: 30% toluene, 3% MeOH and 1% Et<sub>3</sub>N in CH<sub>2</sub>Cl<sub>2</sub>) afforded the title compound as a colorless oil (26 mg, 0.04 mmol, 41% yield). IR  $\nu_{\max}/\text{cm}^{-1}$  (film): 3249, 3036, 2933, 2796, 1663, 1572, 1553, 1525, 1505, 1446, 1406, 1349, 1287, 1204, 1162, 1138, 1010, 906, 816, 758, 730; <sup>1</sup>H NMR (400 MHz, CDCl<sub>3</sub>)  $\delta$ : 9.02 (1H, s), 8.83 (1H, d,  $J$  = 5.0 Hz), 8.26 (1H, d,  $J$  = 5.1 Hz), 8.09 (1H, s), 7.96-7.87 (5H, m), 7.72 (1H, d,  $J$  = 5.0 Hz), 7.66 (1H, t,  $J$  = 7.5 Hz), 7.55 (1H, t,  $J$  = 7.4 Hz), 7.48-7.44 (3H, m), 7.09-7.06 (2H, m), 6.83 (1H, s), 6.62 (1H, d,  $J$  = 5.1 Hz), 3.56 (2H, s), 2.57-2.29 (14H, m), 2.13 (3H, s); <sup>13</sup>C NMR (100 MHz, CDCl<sub>3</sub>)  $\delta$ : 165.33, 164.51, 160.07, 157.95, 156.20, 150.85, 150.62, 147.78, 147.57, 144.55, 142.50, 137.36, 136.47, 133.86, 132.78, 130.60, 129.99, 129.67, 129.24, 127.14, 127.12, 126.91, 124.53, 123.66, 123.51, 122.41, 115.13, 112.72, 112.53, 62.52, 55.08, 53.12, 45.99, 18.74, 17.32;  $m/z$  HRMS (ESI + APCI) found  $[M+H]^+$  635.3221, C<sub>39</sub>H<sub>39</sub>N<sub>8</sub>O<sup>+</sup> requires 635.3247.

## Additional Examples: Characterization

### 2-(Thiophen-3-yl)-3'-(trifluoromethyl)-4,4'-bipyridine

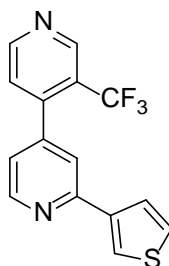

Prepared according to general procedure C using diphenyl(2-(thiophen-3-yl)pyridin-4-yl)(3-(trifluoromethyl)pyridin-4-yl)phosphonium trifluoromethanesulfonate (320 mg, 0.50 mmol), trifluoromethanesulfonic acid (88  $\mu\text{L}$ , 1.00 mmol), and EtOH (1.25 mL). The reaction was heated to 80  $^{\circ}\text{C}$  for 11 hrs. Flash column chromatography (silica gel, gradient elution: 20% EtOAc in hexanes to 30% EtOAc in hexanes) afforded the title compound as a colorless oil (61 mg, 0.20 mmol, 40% yield). IR  $\nu_{\text{max}}/\text{cm}^{-1}$  (film): 3047, 1589, 1540, 1329, 1280, 1265, 1133, 1095, 1029, 907, 730;  $^1\text{H}$  NMR (400 MHz,  $\text{CDCl}_3$ )  $\delta$ : 9.03 (1H, s), 8.87 (1H, d,  $J = 5.0$  Hz), 8.70 (1H, d,  $J = 5.1$  Hz), 7.95 (1H, dd,  $J = 3.1, 1.2$  Hz), 7.66 (1H, dd,  $J = 5.1, 1.2$  Hz), 7.57 (1H, s), 7.41 (1H, dd,  $J = 5.1, 3.1$  Hz), 7.32 (1H, d,  $J = 5.0$  Hz), 7.14 (1H, dd,  $J = 5.0, 1.2$  Hz);  $^{13}\text{C}$  NMR (100 MHz,  $\text{CDCl}_3$ )  $\delta$ : 153.57, 153.00, 149.56, 147.51 (q,  $J = 5.6$  Hz), 146.54 (q,  $J = 1.9$  Hz), 145.53, 141.45, 126.59, 126.04, 125.02, 124.08 (q,  $J = 30.4$  Hz), 123.92 (2C), 123.27 (q,  $J = 274.0$  Hz), 120.93 (q,  $J = 1.6$  Hz);  $^{19}\text{F}$  NMR (365 MHz,  $\text{CDCl}_3$ )  $\delta$ : -56.8;  $m/z$  HRMS (DART) found  $[\text{M}+\text{H}]^+$  307.0535,  $\text{C}_{15}\text{H}_{10}\text{F}_3\text{N}_2\text{S}^+$  requires 307.0511.

### 2'-Phenyl-2,4'-bipyridine

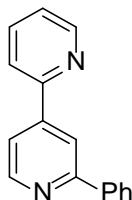

Prepared according to general procedure C using diphenyl(2-phenylpyridin-4-yl)(pyridin-2-yl)phosphonium trifluoromethanesulfonate (142 mg, 0.25 mmol), 4.0 M HCl in dioxanes (125  $\mu\text{L}$ , 0.5 mmol), and EtOH (0.5 mL). The reaction was heated to 80  $^{\circ}\text{C}$  for 24 hours. Flash column chromatography (silica gel was packed in hexanes and neutralized with  $\text{NEt}_3$  then gradient elution: 10% EtOAc in hexanes to 25% EtOAc in hexanes) afforded the title compound as a tan oil (42 mg, 0.18 mmol, 73%). The spectroscopic data is in agreement with a previously reported synthesis (31).

### Ethyl 2-butyl-4-(4-methylquinolin-2-yl)nicotinate

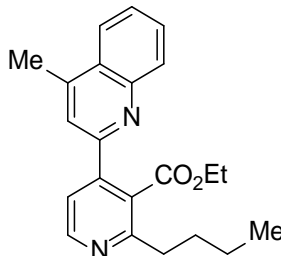

Prepared according to general procedure C using (2-butyl-3-(ethoxycarbonyl)pyridin-4-yl)(4-methylquinolin-2-yl)diphenylphosphonium trifluoromethanesulfonate (341 mg, 0.50 mmol), trifluoromethanesulfonic acid (89  $\mu\text{L}$ , 1.00 mmol) and EtOH (1.25 mL) at 80  $^{\circ}\text{C}$  for 21 hours. Flash column chromatography (silica gel: 16% EtOAc in toluene) afforded the title compound as a light yellow oil (91 mg, 0.26 mmol, 52% yield). IR  $\nu_{\text{max}}/\text{cm}^{-1}$  (film): 3060, 2956, 2930, 2870, 1724, 1597, 1576, 1546, 1507, 1447, 1413, 1364, 1256, 1151, 1131, 1093, 1049, 1022, 839, 758;  $^1\text{H}$  NMR (400 MHz,  $\text{CDCl}_3$ )  $\delta$ : 8.67 (1H, d,  $J = 5.1$  Hz), 8.06 (1H, d,  $J = 8.4$  Hz), 8.00 (1H, d,  $J = 8.3$  Hz), 7.71 (1H, dd,  $J = 8.2, 7.1$  Hz), 7.57 (1H, dd,  $J = 8.0, 7.2$  Hz), 7.54 (1H, s), 7.47 (1H, d,  $J = 5.1$  Hz), 4.22 (2H, q,  $J = 7.2$  Hz), 2.94 (2H, t,  $J = 7.9$  Hz), 2.74 (3H, s), 1.83-1.75 (2H, m), 1.43 (2H, sext,  $J = 7.5$  Hz), 1.07 (3H, t,  $J = 7.2$  Hz), 0.94 (3H, t,  $J = 7.4$  Hz);  $^{13}\text{C}$  NMR (100 MHz,  $\text{CDCl}_3$ )  $\delta$ : 168.89, 160.31, 154.90, 149.88, 147.42, 146.25, 145.49, 130.09, 129.69, 128.07, 127.34, 126.90, 123.63, 120.46, 120.41, 61.22, 35.94, 31.96, 22.72, 18.87, 13.86, 13.85;  $m/z$  HRMS (DART) found  $[\text{M}+\text{H}]^+$  349.1960,  $\text{C}_{22}\text{H}_{25}\text{N}_2\text{O}_2^+$  requires 349.1916.

### (S)-3'-(1-Methylpyrrolidin-2-yl)-2-phenyl-4,4'-bipyridine

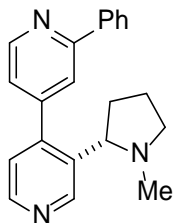

Prepared according to general procedure C using (*S*)-(3-(1-methylpyrrolidin-2-yl)pyridin-4-yl)diphenyl(2-phenylpyridin-4-yl)phosphonium trifluoromethanesulfonate (325 mg, 0.50 mmol), trifluoromethanesulfonic acid (134  $\mu\text{L}$ , 1.50 mmol) and EtOH (1.25 mL) at 80  $^{\circ}\text{C}$  for 12 hours. Flash column chromatography (silica gel: 2.5% MeOH in  $\text{CH}_2\text{Cl}_2$  to 5% MeOH in  $\text{CH}_2\text{Cl}_2$ ) afforded the title compound as a yellow amorphous solid (84 mg, 0.265 mmol, 53% yield). mp 85–88  $^{\circ}\text{C}$ ; IR  $\nu_{\text{max}}/\text{cm}^{-1}$  (film): 3030, 2960, 2937, 2872, 2831, 2770, 1604, 1585, 1577, 1557, 1532, 1467, 1442, 1408, 1390, 1358, 1217, 1182, 1151, 1062, 1039, 1023, 836, 780, 750, 701;  $^1\text{H}$  NMR (400 MHz,  $\text{CDCl}_3$ )  $\delta$ : 8.97 (1H, s), 8.75 (1H, d,  $J = 4.9$  Hz), 8.54 (1H, d,  $J = 4.9$  Hz), 8.02 (2H, d,  $J = 7.4$  Hz), 7.62 (1H, s), 7.50-7.40 (3H, m), 7.13 (1H, d,  $J = 4.9$  Hz), 7.09 (1H, d,  $J = 4.9$  Hz), 3.18-3.12 (2H, m), 2.18-2.03 (5H, m), 1.98-1.86 (1H, m), 1.80-1.66 (2H, m);  $^{13}\text{C}$  NMR (100 MHz,  $\text{CDCl}_3$ )  $\delta$ : 157.40, 150.26, 149.54, 147.57, 147.48, 146.85, 138.74, 136.03, 129.30, 128.81, 126.86, 122.84, 121.89, 120.26, 65.27, 56.64, 40.28, 35.64, 22.79;  $m/z$  HRMS (DART) found  $[\text{M}+\text{H}]^+$  316.1827,  $\text{C}_{21}\text{H}_{22}\text{N}_3^+$  requires 316.1814.

#### 4-Methyl-2-(2-((1-(4-phenoxyphenoxy)propan-2-yl)oxy)pyridin-4-yl)quinoline

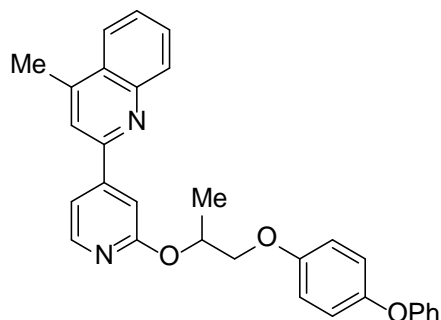

Prepared according to general procedure C using (4-methylquinolin-2-yl)(2-((1-(4-phenoxyphenoxy)propan-2-yl)oxy)pyridin-4-yl)diphenylphosphonium trifluoromethanesulfonate (80 mg, 0.10 mmol), trifluoromethanesulfonic acid (18  $\mu$ L, 0.20 mmol) and EtOH (0.25 mL) at 80  $^{\circ}$ C for 48 hours. Flash column chromatography (silica gel: 2.5% EtOAc in  $\text{CH}_2\text{Cl}_2$  to 5% EtOAc in  $\text{CH}_2\text{Cl}_2$ ) afforded the title compound as a colorless oil (27 mg, 0.06 mmol, 57% yield). IR  $\nu_{\text{max}}/\text{cm}^{-1}$  (film): 3063, 2924, 2870, 1595, 1541, 1502, 1487, 1461, 1418, 1403, 1377, 1345, 1304, 1282, 1265, 1217, 1158, 1134, 1119, 1102, 1072, 1042, 995, 976, 919, 890, 871, 836, 757;  $^1\text{H}$  NMR (400 MHz,  $\text{CDCl}_3$ )  $\delta$ : 8.31 (1H, d,  $J = 4.9$  Hz), 8.18 (1H, d,  $J = 8.4$  Hz), 8.01 (1H, d,  $J = 8.3$  Hz), 7.76-7.66 (3H, m), 7.59 (1H, t,  $J = 7.6$  Hz), 7.51 (1H, s), 7.29 (2H, t,  $J = 7.8$  Hz), 7.05-6.94 (7H, m), 5.72-5.65 (1H, m), 4.25 (1H, dd,  $J = 9.9, 5.4$  Hz), 4.13 (1H, dd,  $J = 9.8, 4.8$  Hz), 2.77 (3H, s), 1.54 (3H, d,  $J = 6.4$  Hz);  $^{13}\text{C}$  NMR (100 MHz,  $\text{CDCl}_3$ )  $\delta$ : 164.03, 158.47, 155.21, 154.26, 150.23, 149.95, 147.98, 147.35, 145.33, 130.55, 129.61, 129.55, 127.84, 126.79, 123.63, 122.36, 120.74, 119.32, 117.57, 115.77, 115.20, 109.69, 71.07, 69.56, 19.01, 17.06;  $m/z$  HRMS (DART) found  $[\text{M}+\text{H}]^+$  463.2017,  $\text{C}_{30}\text{H}_{27}\text{N}_2\text{O}_3^+$  requires 463.2022.

#### (1*R*,4*R*,5*R*)-2-((*R*)-(Benzyloxy)(4'-methyl-[2,2'-biquinolin]-4-yl)methyl)-5-vinylquinuclidine

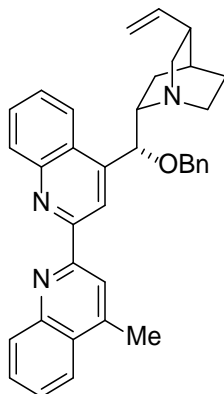

Prepared according to general procedure C using (4-((1*R*)-(benzyloxy)((1*R*,4*R*)-5-vinylquinuclidin-2-yl)methyl)quinolin-2-yl)(4-methylquinolin-2-yl)diphenylphosphonium trifluoromethanesulfonate (215 mg, 0.25 mmol), trifluoromethanesulfonic acid (67  $\mu$ L, 0.75 mmol) and EtOH (625  $\mu$ L) at 80  $^{\circ}$ C for 15 hours. Purified by flash column chromatography three rounds (basic  $\text{Al}_2\text{O}_3$ : 33% EtOAc in hexanes) to afford the title compound as a colorless oil (83 mg, 0.16 mmol, 63% yield). IR  $\nu_{\text{max}}/\text{cm}^{-1}$  (film): 3064, 3031, 2927, 2862, 1594, 1548, 1503,



1452, 1422, 1406, 1297, 1263, 1221, 1161, 1084, 1046, 1027, 990, 907, 883, 863, 815, 756, 728, 697; <sup>1</sup>H NMR (400 MHz, CDCl<sub>3</sub>) δ: 9.02 (1H, s), 8.69 (1H, s), 8.32 (1H, d, *J* = 8.4 Hz), 8.29-8.23 (2H, m), 8.05 (1H, d, *J* = 8.3 Hz), 7.80-7.74 (2H, m), 7.61-7.59 (2H, m), 7.47-7.32 (5H, m), 5.82-5.74 (1H, m), 5.37 (1H, br s), 4.93 (2H, dd, *J* = 17.2, 10.4 Hz), 4.59 (1H, d, *J* = 11.2 Hz), 4.47 (1H, d, *J* = 11.2 Hz), 3.50-3.44 (1H, m), 3.33 (1H, br s), 3.13-3.07 (1H, m), 2.85 (3H, s), 2.73-2.62 (2H, m), 2.26 (1H, br s), 1.97-1.92 (1H, m), 1.81-1.74 (3H, m), 1.53-1.47 (1H, m); <sup>13</sup>C NMR (100 MHz, CDCl<sub>3</sub>) δ: 156.22, 155.79, 148.49, 147.86, 146.76, 144.71, 142.02, 138.00, 130.88, 130.68, 129.07, 129.03, 128.42, 128.35, 128.20, 127.69, 126.83, 126.68, 126.59, 123.70, 123.46, 119.81, 117.56, 114.06, 81.94, 71.49, 60.75, 57.04, 43.03, 40.12, 27.93, 27.77, 22.95, 18.94; *m/z* HRMS (DART) found [M+H]<sup>+</sup> 526.2885, C<sub>36</sub>H<sub>36</sub>N<sub>3</sub>O<sup>+</sup> requires 526.2858.

### 13. Thermochemical Data and Absolute Energy Values

To compare Gibbs free energies along the reaction coordinate, a correction for the change in standard state from gas phase at 1 atm to a 1 M solution was applied to all species ( $G_{corr}^{1M} = RT \cdot \ln\left(\frac{V_0}{V}\right) = +2.36$  kcal/mol). For  $V_0$ , we considered the molar volume of an ideal gas at 353.15 K to be 28.98 l mol<sup>-1</sup>.

**Table S12.** Thermochemical data including absolute energies, zero-point energies (ZPE), T-S and Gibbs free energies along the reaction pathway from **Int-III** at the  $\omega$ B97X-D/6-31+G(d) level. All values include quasi-harmonic corrections.

| System                | E (hartree)  | ZPE (hartree) | T-S (hartree) | G (hartree)  |
|-----------------------|--------------|---------------|---------------|--------------|
| [Int-III]-Py,OMe,ax-a | -1414.803437 | 0.390381      | 0.095766      | -1414.475791 |
| [Int-III]-Py,OMe,ax-b | -1414.802529 | 0.389765      | 0.096565      | -1414.476040 |
| [Int-III]-Py,Py,ax-a  | -1414.788634 | 0.390262      | 0.095984      | -1414.461209 |
| [Int-III]-Ph,OMe,ax-a | -1414.801268 | 0.390497      | 0.095671      | -1414.473414 |
| [Int-III]-Ph,OMe,ax-b | -1414.800387 | 0.390040      | 0.095921      | -1414.473112 |
| [Int-III]-Py,Ph,ax-a  | -1414.786059 | 0.390239      | 0.096125      | -1414.458766 |
| [Int-III]-Ph,Ph,ax-a  | -1414.781281 | 0.389897      | 0.096750      | -1414.454850 |
| [TS-I]-Py,OMe,ax-a    | -1414.752347 | 0.388220      | 0.095681      | -1414.426872 |
| [TS-I]-Ph,OMe,ax-a    | -1414.741220 | 0.388277      | 0.095699      | -1414.415713 |
| [TS-I]-Py,Ph,ax-a     | -1414.747257 | 0.387285      | 0.097162      | -1414.423702 |
| [Int-IV]-Py,Ph,ax-a   | -1414.794151 | 0.389786      | 0.096332      | -1414.467431 |
| [TS-II]-Py,Ph,ax-a    | -1414.793916 | 0.388976      | 0.095692      | -1414.467943 |
| [Int-V]-Py,OMe,ax-a   | -1414.859381 | 0.389933      | 0.098695      | -1414.534274 |
| [Int-V]-Py,OMe,ax-b   | -1414.858316 | 0.389556      | 0.099600      | -1414.534274 |
| [Int-V]-Ph,OMe,ax-a   | -1414.859671 | 0.389243      | 0.100234      | -1414.536442 |
| [Int-V]-Ph,OMe,ax-b   | -1414.858745 | 0.389953      | 0.098822      | -1414.533744 |
| [Int-V]-Py,Ph,ax-a    | -1414.860239 | 0.389670      | 0.099092      | -1414.535600 |
| BiPy                  | -495.239050  | 0.160415      | 0.054965      | -495.120680  |
| Phosph-Ph,Ph,OMe      | -919.605000  | 0.227880      | 0.070212      | -919.427423  |
| PhPy                  | -479.205617  | 0.172111      | 0.055245      | -479.075605  |
| Phosph-Py,Ph,OMe      | -935.639914  | 0.216869      | 0.068537      | -935.472293  |

**Table S13.** Absolute energies and Gibbs free energies along the reaction pathway from **Int-III** at the DLPNO-CCSD(T)/cc-pV(DT)Z// $\omega$ B97X-D/6-31+G(d) level. All values include quasi-harmonic corrections.

| System                     | E (hartree)  | G (hartree)  | G <sub>rel</sub> (kcal/mol)          |
|----------------------------|--------------|--------------|--------------------------------------|
| [Int-III]-Py,OMe,ax-a      | -1413.318548 | -1412.990902 | 0.1                                  |
| [Int-III]-Py,OMe,ax-b      | -1413.317477 | -1412.990987 | 0.0                                  |
| [Int-III]-Py,Py,ax-a       | -1413.306330 | -1412.978904 | 7.6                                  |
| [Int-III]-Ph,OMe,ax-a      | -1413.315975 | -1412.988121 | 1.8                                  |
| [Int-III]-Ph,OMe,ax-b      | -1413.315659 | -1412.988383 | 1.6                                  |
| [Int-III]-Py,Ph,ax-a       | -1413.304320 | -1412.977027 | 8.8                                  |
| [Int-III]-Ph,Ph,ax-a       | -1413.300163 | -1412.973731 | 10.8                                 |
| [TS-I]-Py,OMe,ax-a         | -1413.267942 | -1412.942467 | 30.4                                 |
| [TS-I]-Ph,OMe,ax-a         | -1413.257852 | -1412.932345 | 36.8                                 |
| [TS-I]-Py,Ph,ax-a          | -1413.263204 | -1412.939650 | 32.2                                 |
| [Int-IV]-Py,Ph,ax-a        | -1413.305916 | -1412.979196 | 7.4                                  |
| [TS-II]-Py,Ph,ax-a         | -1413.304702 | -1412.978730 | 7.7                                  |
| [Int-V]-Py,OMe,ax-a        | -1413.366873 | -1413.041765 | -31.9                                |
| [Int-V]-Py,OMe,ax-b        | -1413.365225 | -1413.041183 | -31.5                                |
| [Int-V]-Ph,OMe,ax-a        | -1413.366836 | -1413.043607 | -33.0                                |
| [Int-V]-Ph,OMe,ax-b        | -1413.365545 | -1413.040544 | -31.1                                |
| [Int-V]-Py,Ph,ax-a         | -1413.367564 | -1413.042925 | -32.6                                |
| BiPy                       | -494.727418  | -494.609049  | -                                    |
| Phosph-Ph,Ph,OMe           | -918.625005  | -918.447428  | -                                    |
| BiPy +<br>Phosph-Ph,Ph,OMe | -1413.352423 | -1413.056477 | -38.7<br>( $G_{corr}^{1M}$ included) |
| PhPy                       | -478.692700  | -478.562689  | -                                    |
| Phosph-Py,Ph,OMe           | -934.660342  | -934.492721  | -                                    |
| PhPy +<br>Phosph-Py,Ph,OMe | -1413.353042 | -1413.05541  | -38.1<br>( $G_{corr}^{1M}$ included) |

**Table S14.** Absolute energies and Gibbs free energies along the reaction pathway from **Int-III** at the  $\omega$ B97X-D/def2-QZVPP// $\omega$ B97X-D/6-31+G(d) level. All values include quasi-harmonic corrections.

| System                     | E (hartree)  | G (hartree)  | G <sub>rel</sub> (kcal/mol)          |
|----------------------------|--------------|--------------|--------------------------------------|
| [Int-III]-Py,OMe,ax-a      | -1415.256868 | -1414.929222 | 0.1                                  |
| [Int-III]-Py,OMe,ax-b      | -1415.255945 | -1414.929455 | 0.0                                  |
| [Int-III]-Py,Py,ax-a       | -1415.244831 | -1414.917405 | 7.6                                  |
| [Int-III]-Ph,OMe,ax-a      | -1415.254623 | -1414.926769 | 1.7                                  |
| [Int-III]-Ph,OMe,ax-b      | -1415.253758 | -1414.926482 | 1.9                                  |
| [Int-III]-Py,Ph,ax-a       | -1415.242494 | -1414.915201 | 8.9                                  |
| [Int-III]-Ph,Ph,ax-a       | -1415.237355 | -1414.910923 | 11.6                                 |
| [TS-I]-Py,OMe,ax-a         | -1415.209182 | -1414.883708 | 28.7                                 |
| [TS-I]-Ph,OMe,ax-a         | -1415.198305 | -1414.872798 | 35.6                                 |
| [TS-I]-Py,Ph,ax-a          | -1415.205324 | -1414.881770 | 29.9                                 |
| [Int-IV]-Py,Ph,ax-a        | -1415.248970 | -1414.922253 | 4.5                                  |
| [TS-II]-Py,Ph,ax-a         | -1415.247531 | -1414.921559 | 5.0                                  |
| [Int-V]-Py,OMe,ax-a        | -1415.309483 | -1414.984375 | -34.5                                |
| [Int-V]-Py,OMe,ax-b        | -1415.308302 | -1414.984260 | -34.4                                |
| [Int-V]-Ph,OMe,ax-a        | -1415.309784 | -1414.986554 | -35.8                                |
| [Int-V]-Ph,OMe,ax-b        | -1415.308775 | -1414.983775 | -34.1                                |
| [Int-V]-Py,Ph,ax-a         | -1415.309791 | -1414.985151 | -34.9                                |
| BiPy                       | -495.422409  | -495.304039  | -                                    |
| Phosph-Ph,Ph,OMe           | -919.872786  | -919.695209  | -                                    |
| BiPy +<br>Phosph-Ph,Ph,OMe | -1415.295195 | -1414.999248 | -41.4<br>( $G_{corr}^{1M}$ included) |
| PhPy                       | -479.383436  | -479.253424  | -                                    |
| Phosph-Py,Ph,OMe           | -935.913465  | -935.745844  | -                                    |
| PhPy +<br>Phosph-Py,Ph,OMe | -1415.296901 | -1414.999268 | -41.4<br>( $G_{corr}^{1M}$ included) |

**Table S15.** Thermochemical data including absolute energies, zero-point energies (ZPE), T·S and Gibbs free energies along the reaction pathway from **[Int-III·H]<sup>+</sup>** at the  $\omega$ B97X-D/6-31+G(d) level. All values include quasi-harmonic corrections.

| System                                                  | E (hartree)  | ZPE (hartree) | T·S (hartree) | G (hartree)  |
|---------------------------------------------------------|--------------|---------------|---------------|--------------|
| <b>[Int-III·H]<sup>+</sup>-PyH<sup>+</sup>,OMe,ax-a</b> | -1415.262121 | 0.404638      | 0.095855      | -1414.920109 |
| <b>[Int-III·H]<sup>+</sup>-PyH<sup>+</sup>,OMe,ax-b</b> | -1415.263469 | 0.404777      | 0.095922      | -1414.921433 |
| <b>[Int-III·H]<sup>+</sup>-Py,OMe,ax-a</b>              | -1415.260058 | 0.404555      | 0.096047      | -1414.918301 |
| <b>[Int-III·H]<sup>+</sup>-Py,OMe,ax-b</b>              | -1415.255477 | 0.404475      | 0.095756      | -1414.913564 |
| <b>[Int-III·H]<sup>+</sup>-Py,OMe,ax-c</b>              | -1415.257792 | 0.405108      | 0.095342      | -1414.914975 |
| <b>[Int-III·H]<sup>+</sup>-Py,PyH<sup>+</sup>,ax-a</b>  | -1415.248032 | 0.404674      | 0.095901      | -1414.906052 |
| <b>[Int-III·H]<sup>+</sup>-Py,PyH<sup>+</sup>,ax-b</b>  | -1415.249944 | 0.404386      | 0.096363      | -1414.908535 |
| <b>[Int-III·H]<sup>+</sup>-Ph,OMe,ax-a</b>              | -1415.255391 | 0.404550      | 0.095345      | -1414.913106 |
| <b>[Int-III·H]<sup>+</sup>-PyH<sup>+</sup>,Ph,ax-a</b>  | -1415.247341 | 0.404111      | 0.096617      | -1414.906360 |
| <b>[Int-III·H]<sup>+</sup>-PyH<sup>+</sup>,Ph,ax-b</b>  | -1415.246798 | 0.403983      | 0.096930      | -1414.906200 |
| <b>[Int-III·H]<sup>+</sup>-Ph,Ph,ax-a</b>               | -1415.237385 | 0.403956      | 0.097217      | -1414.897084 |
| <b>[TS-I·H]<sup>+</sup>-Py,OMe,ax-a</b>                 | -1415.229298 | 0.402314      | 0.095970      | -1414.889798 |
| <b>[TS-I·H]<sup>+</sup>-Ph,OMe,ax-a</b>                 | -1415.218953 | 0.403480      | 0.094704      | -1414.877465 |
| <b>[TS-I·H]<sup>+</sup>-Py,Ph,ax-a</b>                  | -1415.220149 | 0.402099      | 0.096364      | -1414.881090 |
| <b>[Int-IV·H]<sup>+</sup>-Py,OMe,ax-a*</b>              | -1415.288257 | 0.404398      | 0.096500      | -1414.946932 |
| <b>[Int-IV·H]<sup>+</sup>-Py,OMe,ax-b</b>               | -1415.291214 | 0.404355      | 0.096727      | -1414.950053 |
| <b>[Int-IV·H]<sup>+</sup>-Ph,OMe,ax-a</b>               | -1415.282840 | 0.404072      | 0.096590      | -1414.941851 |
| <b>[Int-IV·H]<sup>+</sup>-Ph,OMe,ax-b</b>               | -1415.285992 | 0.404052      | 0.097358      | -1414.945697 |
| <b>[Int-IV·H]<sup>+</sup>-Py,Ph,ax-a</b>                | -1415.288417 | 0.403684      | 0.097399      | -1414.948300 |
| <b>[TS-II·H]<sup>+</sup>-Py,OMe,ax-a</b>                | -1415.282237 | 0.403121      | 0.096600      | -1414.942537 |
| <b>[TS-II·H]<sup>+</sup>-Ph,OMe,ax-a</b>                | -1415.279125 | 0.402521      | 0.097169      | -1414.940420 |
| <b>[TS-II·H]<sup>+</sup>-Py,Ph,ax-a</b>                 | -1415.279596 | 0.403239      | 0.095948      | -1414.939287 |
| <b>[Int-V·H]<sup>+</sup>-Py,OMe,ax-a*</b>               | -1415.314386 | 0.403894      | 0.100227      | -1414.976601 |
| <b>[Int-V·H]<sup>+</sup>-Ph,OMe,ax-a</b>                | -1415.314710 | 0.404168      | 0.099293      | -1414.975817 |
| <b>[Int-V·H]<sup>+</sup>-Py,Ph,ax-a*</b>                | -1415.315627 | 0.403783      | 0.099682      | -1414.977268 |
| <b>[BiPy·H]<sup>+</sup></b>                             | -495.693964  | 0.174416      | 0.055238      | -495.561679  |
| <b>Phosph-Ph,Ph,OMe</b>                                 | -919.605000  | 0.227880      | 0.070212      | -919.427423  |
| <b>[PhPy·H]<sup>+</sup></b>                             | -479.662889  | 0.186174      | 0.055538      | -479.518906  |
| <b>Phosph-Py,Ph,OMe</b>                                 | -935.639914  | 0.216869      | 0.068537      | -935.472293  |

\*These systems showed  $\nu_i < 35 \text{ cm}^{-1}$ . These imaginary frequencies were inverted to their respective positive values before the QHA entropic corrections were computed as seen in previous examples. (97)

**Table S16.** Absolute energies and Gibbs free energies along the reaction pathway from **[Int-III·H]<sup>+</sup>** at the DLPNO-CCSD(T)/cc-pV(DT)Z// $\omega$ B97X-D/6-31+G(d) level. All values include quasi-harmonic corrections.

| System                                                  | E (hartree)  | G (hartree)  | G <sub>rel</sub> (kcal/mol) |
|---------------------------------------------------------|--------------|--------------|-----------------------------|
| <b>[Int-III·H]<sup>+</sup>-PyH<sup>+</sup>,OMe,ax-a</b> | -1413.776342 | -1413.434331 | 0.6                         |
| <b>[Int-III·H]<sup>+</sup>-PyH<sup>+</sup>,OMe,ax-b</b> | -1413.777378 | -1413.435342 | 0.0                         |
| <b>[Int-III·H]<sup>+</sup>-Py,OMe,ax-a</b>              | -1413.774234 | -1413.432478 | 1.8                         |
| <b>[Int-III·H]<sup>+</sup>-Py,OMe,ax-b</b>              | -1413.769657 | -1413.427744 | 4.8                         |
| <b>[Int-III·H]<sup>+</sup>-Py,OMe,ax-c</b>              | -1413.771195 | -1413.428379 | 4.4                         |
| <b>[Int-III·H]<sup>+</sup>-Py,PyH<sup>+</sup>,ax-a</b>  | -1413.764070 | -1413.422091 | 8.3                         |
| <b>[Int-III·H]<sup>+</sup>-Py,PyH<sup>+</sup>,ax-b</b>  | -1413.767048 | -1413.425639 | 6.1                         |
| <b>[Int-III·H]<sup>+</sup>-Ph,OMe,ax-a</b>              | -1413.768895 | -1413.426609 | 5.5                         |
| <b>[Int-III·H]<sup>+</sup>-PyH<sup>+</sup>,Ph,ax-a</b>  | -1413.764661 | -1413.423680 | 7.3                         |
| <b>[Int-III·H]<sup>+</sup>-PyH<sup>+</sup>,Ph,ax-b</b>  | -1413.764384 | -1413.423786 | 7.3                         |
| <b>[Int-III·H]<sup>+</sup>-Ph,Ph,ax-a</b>               | -1413.754571 | -1413.414270 | 13.2                        |
| <b>[TS-I·H]<sup>+</sup>-Py,OMe,ax-a</b>                 | -1413.743709 | -1413.404209 | 19.5                        |
| <b>[TS-I·H]<sup>+</sup>-Ph,OMe,ax-a</b>                 | -1413.734467 | -1413.392979 | 26.6                        |
| <b>[TS-I·H]<sup>+</sup>-Py,Ph,ax-a</b>                  | -1413.734881 | -1413.395823 | 24.8                        |
| <b>[Int-IV·H]<sup>+</sup>-Py,OMe,ax-a*</b>              | -1413.799816 | -1413.458491 | -14.5                       |
| <b>[Int-IV·H]<sup>+</sup>-Py,OMe,ax-b</b>               | -1413.802370 | -1413.461209 | -16.2                       |
| <b>[Int-IV·H]<sup>+</sup>-Ph,OMe,ax-a</b>               | -1413.795050 | -1413.454061 | -11.7                       |
| <b>[Int-IV·H]<sup>+</sup>-Ph,OMe,ax-b</b>               | -1413.797667 | -1413.457372 | -13.8                       |
| <b>[Int-IV·H]<sup>+</sup>-Py,Ph,ax-a</b>                | -1413.800840 | -1413.460723 | -15.9                       |
| <b>[TS-II·H]<sup>+</sup>-Py,OMe,ax-a</b>                | -1413.789622 | -1413.449922 | -9.1                        |
| <b>[TS-II·H]<sup>+</sup>-Ph,OMe,ax-a</b>                | -1413.786764 | -1413.448059 | -8.0                        |
| <b>[TS-II·H]<sup>+</sup>-Py,Ph,ax-a</b>                 | -1413.786334 | -1413.446025 | -6.7                        |
| <b>[Int-V·H]<sup>+</sup>-Py,OMe,ax-a*</b>               | -1413.821310 | -1413.483525 | -30.2                       |
| <b>[Int-V·H]<sup>+</sup>-Ph,OMe,ax-a</b>                | -1413.820113 | -1413.481220 | -28.8                       |
| <b>[Int-V·H]<sup>+</sup>-Py,Ph,ax-a*</b>                | -1413.822152 | -1413.483793 | -30.4                       |
| <b>[BiPy·H]<sup>+</sup></b>                             | -495.182152  | -495.049867  | -                           |
| <b>Phosph-Ph,Ph,OMe</b>                                 | -918.625005  | -918.447428  | -                           |
| <b>[BiPy·H]<sup>+</sup> +</b>                           |              |              | -36.5                       |
| <b>Phosph-Ph,Ph,OMe</b>                                 | -1413.807157 | -1413.497295 | ( $G_{corr}^{1M}$ included) |
| <b>[PhPy·H]<sup>+</sup></b>                             | -479.149345  | -479.005362  | -                           |
| <b>Phosph-Py,Ph,OMe</b>                                 | -934.660342  | -934.492721  | -                           |
| <b>[PhPy·H]<sup>+</sup> +</b>                           |              |              | -37.0                       |
| <b>Phosph-Py,Ph,OMe</b>                                 | -1413.809687 | -1413.498083 | ( $G_{corr}^{1M}$ included) |

\*These systems showed  $\nu_i < 35 \text{ cm}^{-1}$ . These imaginary frequencies were inverted to their respective positive values before the QHA entropic corrections were computed as seen in previous examples (97).

**Table S17.** Absolute energies and Gibbs free energies along the reaction pathway from **[Int-III·H]<sup>+</sup>** at the  $\omega$ B97X-D/def2-QZVPP// $\omega$ B97X-D/6-31+G(d) level. All values include quasi-harmonic corrections.

| System                                                  | E (hartree)  | G (hartree)  | G <sub>rel</sub> (kcal/mol) |
|---------------------------------------------------------|--------------|--------------|-----------------------------|
| <b>[Int-III·H]<sup>+</sup>-PyH<sup>+</sup>,OMe,ax-a</b> | -1415.720913 | -1415.378902 | 0.8                         |
| <b>[Int-III·H]<sup>+</sup>-PyH<sup>+</sup>,OMe,ax-b</b> | -1415.722258 | -1415.380222 | 0.0                         |
| <b>[Int-III·H]<sup>+</sup>-Py,OMe,ax-a</b>              | -1415.718735 | -1415.376979 | 2.0                         |
| <b>[Int-III·H]<sup>+</sup>-Py,OMe,ax-b</b>              | -1415.714218 | -1415.372305 | 5.0                         |
| <b>[Int-III·H]<sup>+</sup>-Py,OMe,ax-c</b>              | -1415.716455 | -1415.373639 | 4.1                         |
| <b>[Int-III·H]<sup>+</sup>-Py,PyH<sup>+</sup>,ax-a</b>  | -1415.709362 | -1415.367383 | 8.1                         |
| <b>[Int-III·H]<sup>+</sup>-Py,PyH<sup>+</sup>,ax-b</b>  | -1415.711284 | -1415.369875 | 6.5                         |
| <b>[Int-III·H]<sup>+</sup>-Ph,OMe,ax-a</b>              | -1415.714124 | -1415.371838 | 5.3                         |
| <b>[Int-III·H]<sup>+</sup>-PyH<sup>+</sup>,Ph,ax-a</b>  | -1415.708852 | -1415.367871 | 7.8                         |
| <b>[Int-III·H]<sup>+</sup>-PyH<sup>+</sup>,Ph,ax-b</b>  | -1415.708315 | -1415.367717 | 7.8                         |
| <b>[Int-III·H]<sup>+</sup>-Ph,Ph,ax-a</b>               | -1415.699327 | -1415.359026 | 13.3                        |
| <b>[TS-I·H]<sup>+</sup>-Py,OMe,ax-a</b>                 | -1415.691404 | -1415.351903 | 17.8                        |
| <b>[TS-I·H]<sup>+</sup>-Ph,OMe,ax-a</b>                 | -1415.681360 | -1415.339872 | 25.3                        |
| <b>[TS-I·H]<sup>+</sup>-Py,Ph,ax-a</b>                  | -1415.683835 | -1415.344777 | 22.2                        |
| <b>[Int-IV·H]<sup>+</sup>-Py,OMe,ax-a*</b>              | -1415.749250 | -1415.407922 | -17.4                       |
| <b>[Int-IV·H]<sup>+</sup>-Py,OMe,ax-b</b>               | -1415.752260 | -1415.411095 | -19.4                       |
| <b>[Int-IV·H]<sup>+</sup>-Ph,OMe,ax-a</b>               | -1415.743890 | -1415.402903 | -14.2                       |
| <b>[Int-IV·H]<sup>+</sup>-Ph,OMe,ax-b</b>               | -1415.747130 | -1415.406836 | -16.7                       |
| <b>[Int-IV·H]<sup>+</sup>-Py,Ph,ax-a</b>                | -1415.749470 | -1415.409353 | -18.3                       |
| <b>[TS-II·H]<sup>+</sup>-Py,OMe,ax-a</b>                | -1415.739550 | -1415.399850 | -12.3                       |
| <b>[TS-II·H]<sup>+</sup>-Ph,OMe,ax-a</b>                | -1415.736760 | -1415.398055 | -11.2                       |
| <b>[TS-II·H]<sup>+</sup>-Py,Ph,ax-a</b>                 | -1415.736814 | -1415.396505 | -10.2                       |
| <b>[Int-V·H]<sup>+</sup>-Py,OMe,ax-a*</b>               | -1415.769264 | -1415.431479 | -32.2                       |
| <b>[Int-V·H]<sup>+</sup>-Ph,OMe,ax-a</b>                | -1415.769772 | -1415.430879 | -31.8                       |
| <b>[Int-V·H]<sup>+</sup>-Py,Ph,ax-a*</b>                | -1415.770107 | -1415.431748 | -32.3                       |
| <b>[BiPy·H]<sup>+</sup></b>                             | -495.882458  | -495.750173  | -                           |
| <b>Phosph-Ph,Ph,OMe</b>                                 | -919.872786  | -919.695209  | -                           |
| <b>[BiPy·H]<sup>+</sup> +</b>                           |              |              | -38.5                       |
| <b>Phosph-Ph,Ph,OMe</b>                                 | -1415.755244 | -1415.445382 | ( $G_{CORR}^{1M}$ included) |
| <b>[PhPy·H]<sup>+</sup></b>                             | -479.845825  | -479.701842  | -                           |
| <b>Phosph-Py,Ph,OMe</b>                                 | -935.913465  | -935.745844  | -                           |
| <b>[PhPy·H]<sup>+</sup> +</b>                           |              |              | -40.0                       |
| <b>Phosph-Py,Ph,OMe</b>                                 | -1415.75929  | -1415.447686 | ( $G_{CORR}^{1M}$ included) |

\*These systems showed  $\nu_i < 35 \text{ cm}^{-1}$ . These imaginary frequencies were inverted to their respective positive values before the QHA entropic corrections were computed as seen in previous examples (97).

**Table S18.** Thermochemical data including absolute energies, zero-point energies (ZPE), T·S and Gibbs free energies along the reaction pathway from **[Int-III·2H]<sup>2+</sup>** at the  $\omega$ B97X-D/6-31+G(d) level. All values include quasi-harmonic corrections.

| System                                                                | E (hartree)  | ZPE (hartree) | T·S (hartree) | G (hartree)  |
|-----------------------------------------------------------------------|--------------|---------------|---------------|--------------|
| <b>[Int-III·2H]<sup>2+</sup>-PyH<sup>+</sup>,OMe,ax-a</b>             | -1415.715045 | 0.419114      | 0.096169      | -1415.358797 |
| <b>[Int-III·2H]<sup>2+</sup>-PyH<sup>+</sup>,OMe,ax-b</b>             | -1415.711031 | 0.419045      | 0.095727      | -1415.354450 |
| <b>[Int-III·2H]<sup>2+</sup>-PyH<sup>+</sup>,OMe,ax-c</b>             | -1415.713255 | 0.418916      | 0.096062      | -1415.357040 |
| <b>[Int-III·2H]<sup>2+</sup>-PyH<sup>+</sup>,PyH<sup>+</sup>,ax-a</b> | -1415.706212 | 0.419258      | 0.095755      | -1415.349458 |
| <b>[Int-III·2H]<sup>2+</sup>-Ph,OMe,ax-a</b>                          | -1415.708399 | 0.419425      | 0.095324      | -1415.351204 |
| <b>[Int-III·2H]<sup>2+</sup>-Ph,OMe,ax-b</b>                          | -1415.706755 | 0.419581      | 0.095533      | -1415.349573 |
| <b>[Int-III·2H]<sup>2+</sup>-PyH<sup>+</sup>,Ph,ax-a</b>              | -1415.698106 | 0.418680      | 0.096493      | -1415.342438 |
| <b>[Int-III·2H]<sup>2+</sup>-PyH<sup>+</sup>,Ph,ax-b</b>              | -1415.697383 | 0.418818      | 0.096644      | -1415.341718 |
| <b>[Int-III·2H]<sup>2+</sup>-Ph,Ph,ax-a</b>                           | -1415.689310 | 0.418363      | 0.097117      | -1415.334496 |
| <b>[TS-I·2H]<sup>2+</sup>-PyH<sup>+</sup>,OMe,ax-a</b>                | -1415.682140 | 0.417530      | 0.095393      | -1415.326982 |
| <b>[TS-I·2H]<sup>2+</sup>-PyH<sup>+</sup>,OMe,ax-b</b>                | -1415.686916 | 0.417186      | 0.096003      | -1415.332533 |
| <b>[TS-I·2H]<sup>2+</sup>-Ph,OMe,ax-a</b>                             | -1415.670386 | 0.417010      | 0.095543      | -1415.315861 |
| <b>[TS-I·2H]<sup>2+</sup>-PyH<sup>+</sup>,Ph,ax-a</b>                 | -1415.681170 | 0.416331      | 0.097009      | -1415.328257 |
| <b>[TS-I·2H]<sup>2+</sup>-Ph,Ph,ax-a</b>                              | -1415.661334 | 0.416101      | 0.096741      | -1415.308530 |
| <b>[Int-IV·2H]<sup>2+</sup>-PyH<sup>+</sup>,OMe,ax-a</b>              | -1415.739754 | 0.418595      | 0.097298      | -1415.384856 |
| <b>[Int-IV·2H]<sup>2+</sup>-PyH<sup>+</sup>,OMe,ax-b</b>              | -1415.742543 | 0.418177      | 0.095240      | -1415.386770 |
| <b>[Int-IV·2H]<sup>2+</sup>-Ph,OMe,ax-a</b>                           | -1415.730395 | 0.418574      | 0.096589      | -1415.374822 |
| <b>[Int-IV·2H]<sup>2+</sup>-PyH<sup>+</sup>,Ph,ax-a</b>               | -1415.740873 | 0.418274      | 0.098334      | -1415.387006 |
| <b>[TS-II·2H]<sup>2+</sup>-PyH<sup>+</sup>,OMe,ax-a</b>               | -1415.734212 | 0.417525      | 0.096379      | -1415.379855 |
| <b>[TS-II·2H]<sup>2+</sup>-Ph,OMe,ax-a</b>                            | -1415.727262 | 0.417335      | 0.095933      | -1415.372721 |
| <b>[TS-II·2H]<sup>2+</sup>-PyH<sup>+</sup>,Ph,ax-a</b>                | -1415.731725 | 0.418091      | 0.095632      | -1415.376324 |
| <b>[Int-V·2H]<sup>2+</sup>-PyH<sup>+</sup>,OMe,ax-a</b>               | -1415.765251 | 0.418693      | 0.099081      | -1415.411556 |
| <b>[Int-V·2H]<sup>2+</sup>-Ph,OMe,ax-a</b>                            | -1415.767800 | 0.418564      | 0.098581      | -1415.413736 |
| <b>[Int-V·2H]<sup>2+</sup>-PyH<sup>+</sup>,Ph,ax-a</b>                | -1415.766283 | 0.417841      | 0.099483      | -1415.41356  |
| <b>[BiPy·2H]<sup>2+</sup></b>                                         | -496.142980  | 0.188377      | 0.055558      | -495.996855  |
| <b>Phosph-Ph,Ph,OMe</b>                                               | -919.605000  | 0.227880      | 0.070212      | -919.427423  |
| <b>[PhPy·H]<sup>+</sup></b>                                           | -479.662889  | 0.186174      | 0.055538      | -479.518906  |
| <b>Phosph-PyH<sup>+</sup>,Ph,OMe</b>                                  | -936.091213  | 0.230776      | 0.069174      | -935.910036  |



**Table S19.** Absolute energies and Gibbs free energies along the reaction pathway from **[Int-III·2H]<sup>2+</sup>** at the DLPNO-CCSD(T)/cc-pV(DT)Z// $\omega$ B97X-D/6-31+G(d) level. All values include quasi-harmonic corrections.

| System                                                                | E (hartree)  | G (hartree)  | G <sub>rel</sub> (kcal/mol) |
|-----------------------------------------------------------------------|--------------|--------------|-----------------------------|
| <b>[Int-III·2H]<sup>2+</sup>-PyH<sup>+</sup>,OMe,ax-a</b>             | -1414.223227 | -1413.866979 | 0.0                         |
| <b>[Int-III·2H]<sup>2+</sup>-PyH<sup>+</sup>,OMe,ax-b</b>             | -1414.223209 | -1413.866629 | 0.2                         |
| <b>[Int-III·2H]<sup>2+</sup>-PyH<sup>+</sup>,OMe,ax-c</b>             | -1414.211964 | -1413.855749 | 7.0                         |
| <b>[Int-III·2H]<sup>2+</sup>-PyH<sup>+</sup>,PyH<sup>+</sup>,ax-a</b> | -1414.220429 | -1413.863674 | 2.1                         |
| <b>[Int-III·2H]<sup>2+</sup>-Ph,OMe,ax-a</b>                          | -1414.219198 | -1413.862003 | 3.1                         |
| <b>[Int-III·2H]<sup>2+</sup>-Ph,OMe,ax-b</b>                          | -1414.218356 | -1413.861174 | 3.6                         |
| <b>[Int-III·2H]<sup>2+</sup>-PyH<sup>+</sup>,Ph,ax-a</b>              | -1414.213688 | -1413.858020 | 5.6                         |
| <b>[Int-III·2H]<sup>2+</sup>-PyH<sup>+</sup>,Ph,ax-b</b>              | -1414.212305 | -1413.856639 | 6.5                         |
| <b>[Int-III·2H]<sup>2+</sup>-Ph,Ph,ax-a</b>                           | -1414.203378 | -1413.848565 | 11.6                        |
| <b>[TS-I·2H]<sup>2+</sup>-PyH<sup>+</sup>,OMe,ax-a</b>                | -1414.194715 | -1413.839557 | 17.2                        |
| <b>[TS-I·2H]<sup>2+</sup>-PyH<sup>+</sup>,OMe,ax-b</b>                | -1414.199208 | -1413.844825 | 13.9                        |
| <b>[TS-I·2H]<sup>2+</sup>-Ph,OMe,ax-a</b>                             | -1414.181410 | -1413.826885 | 25.2                        |
| <b>[TS-I·2H]<sup>2+</sup>-PyH<sup>+</sup>,Ph,ax-a</b>                 | -1414.192702 | -1413.839788 | 17.1                        |
| <b>[TS-I·2H]<sup>2+</sup>-Ph,Ph,ax-a</b>                              | -1414.173224 | -1413.820421 | 29.2                        |
| <b>[Int-IV·2H]<sup>2+</sup>-PyH<sup>+</sup>,OMe,ax-a</b>              | -1414.248486 | -1413.893588 | -16.7                       |
| <b>[Int-IV·2H]<sup>2+</sup>-PyH<sup>+</sup>,OMe,ax-b</b>              | -1414.251141 | -1413.895368 | -17.8                       |
| <b>[Int-IV·2H]<sup>2+</sup>-Ph,OMe,ax-a</b>                           | -1414.238513 | -1413.882940 | -10.0                       |
| <b>[Int-IV·2H]<sup>2+</sup>-PyH<sup>+</sup>,Ph,ax-a</b>               | -1414.250426 | -1413.896559 | -18.6                       |
| <b>[TS-II·2H]<sup>2+</sup>-PyH<sup>+</sup>,OMe,ax-a</b>               | -1414.238504 | -1413.884147 | -10.8                       |
| <b>[TS-II·2H]<sup>2+</sup>-Ph,OMe,ax-a</b>                            | -1414.231879 | -1413.877338 | -6.5                        |
| <b>[TS-II·2H]<sup>2+</sup>-PyH<sup>+</sup>,Ph,ax-a</b>                | -1414.235758 | -1413.880357 | -8.4                        |
| <b>[Int-V·2H]<sup>2+</sup>-PyH<sup>+</sup>,OMe,ax-a</b>               | -1414.269254 | -1413.915559 | -30.5                       |
| <b>[Int-V·2H]<sup>2+</sup>-Ph,OMe,ax-a</b>                            | -1414.272460 | -1413.918397 | -32.3                       |
| <b>[Int-V·2H]<sup>2+</sup>-PyH<sup>+</sup>,Ph,ax-a</b>                | -1414.270115 | -1413.917392 | -31.6                       |
| <b>[BiPy·2H]<sup>2+</sup></b>                                         | -495.630016  | -495.483890  | -                           |
| <b>Phosph-Ph,Ph,OMe</b>                                               | -918.625005  | -918.447428  | -                           |
| <b>[BiPy·2H]<sup>2+</sup> +<br/>Phosph-Ph,Ph,OMe</b>                  | -1414.255021 | -1413.931318 | -38.0                       |
| <b>[PhPy·H]<sup>+</sup></b>                                           | -479.149345  | -479.005362  | -                           |
| <b>Phosph-PyH<sup>+</sup>,Ph,OMe</b>                                  | -935.111488  | -934.930311  | -                           |
| <b>[PhPy·H]<sup>+</sup> +<br/>Phosph-PyH<sup>+</sup>,Ph,OMe</b>       | -1414.260833 | -1413.935673 | -40.7                       |

**Table S20.** Absolute energies and Gibbs free energies along the reaction pathway from **[Int-III·2H]<sup>2+</sup>** at the  $\omega$ B97X-D/def2-QZVPP// $\omega$ B97X-D/6-31+G(d) level. All values include quasi-harmonic corrections.

| System                                                                | E (hartree)  | G (hartree)  | G <sub>rel</sub> (kcal/mol) |
|-----------------------------------------------------------------------|--------------|--------------|-----------------------------|
| <b>[Int-III·2H]<sup>2+</sup>-PyH<sup>+</sup>,OMe,ax-a</b>             | -1416.178948 | -1415.822700 | 0.0                         |
| <b>[Int-III·2H]<sup>2+</sup>-PyH<sup>+</sup>,OMe,ax-b</b>             | -1416.175069 | -1415.818489 | 2.6                         |
| <b>[Int-III·2H]<sup>2+</sup>-PyH<sup>+</sup>,OMe,ax-c</b>             | -1416.177246 | -1415.821031 | 1.0                         |
| <b>[Int-III·2H]<sup>2+</sup>-PyH<sup>+</sup>,PyH<sup>+</sup>,ax-a</b> | -1416.172628 | -1415.815873 | 4.3                         |
| <b>[Int-III·2H]<sup>2+</sup>-Ph,OMe,ax-a</b>                          | -1416.172269 | -1415.815074 | 4.8                         |
| <b>[Int-III·2H]<sup>2+</sup>-Ph,OMe,ax-b</b>                          | -1416.170770 | -1415.813588 | 5.7                         |
| <b>[Int-III·2H]<sup>2+</sup>-PyH<sup>+</sup>,Ph,ax-a</b>              | -1416.164642 | -1415.808974 | 8.6                         |
| <b>[Int-III·2H]<sup>2+</sup>-PyH<sup>+</sup>,Ph,ax-b</b>              | -1416.163978 | -1415.808312 | 9.0                         |
| <b>[Int-III·2H]<sup>2+</sup>-Ph,Ph,ax-a</b>                           | -1416.156198 | -1415.801385 | 13.4                        |
| <b>[TS-I·2H]<sup>2+</sup>-PyH<sup>+</sup>,OMe,ax-a</b>                | -1416.149376 | -1415.794218 | 17.9                        |
| <b>[TS-I·2H]<sup>2+</sup>-PyH<sup>+</sup>,OMe,ax-b</b>                | -1416.154105 | -1415.799722 | 14.4                        |
| <b>[TS-I·2H]<sup>2+</sup>-Ph,OMe,ax-a</b>                             | -1416.137733 | -1415.783208 | 24.8                        |
| <b>[TS-I·2H]<sup>2+</sup>-PyH<sup>+</sup>,Ph,ax-a</b>                 | -1416.149430 | -1415.796516 | 16.4                        |
| <b>[TS-I·2H]<sup>2+</sup>-Ph,Ph,ax-a</b>                              | -1416.130386 | -1415.777583 | 28.3                        |
| <b>[Int-IV·2H]<sup>2+</sup>-PyH<sup>+</sup>,OMe,ax-a</b>              | -1416.205900 | -1415.851003 | -17.8                       |
| <b>[Int-IV·2H]<sup>2+</sup>-PyH<sup>+</sup>,OMe,ax-b</b>              | -1416.208740 | -1415.852962 | -19.0                       |
| <b>[Int-IV·2H]<sup>2+</sup>-Ph,OMe,ax-a</b>                           | -1416.196260 | -1415.840681 | -11.3                       |
| <b>[Int-IV·2H]<sup>2+</sup>-PyH<sup>+</sup>,Ph,ax-a</b>               | -1416.207000 | -1415.853131 | -19.1                       |
| <b>[TS-II·2H]<sup>2+</sup>-PyH<sup>+</sup>,OMe,ax-a</b>               | -1416.196888 | -1415.842531 | -12.4                       |
| <b>[TS-II·2H]<sup>2+</sup>-Ph,OMe,ax-a</b>                            | -1416.190437 | -1415.835897 | -8.3                        |
| <b>[TS-II·2H]<sup>2+</sup>-PyH<sup>+</sup>,Ph,ax-a</b>                | -1416.194030 | -1415.838630 | -10.0                       |
| <b>[Int-V·2H]<sup>2+</sup>-PyH<sup>+</sup>,OMe,ax-a</b>               | -1416.224969 | -1415.871275 | -30.5                       |
| <b>[Int-V·2H]<sup>2+</sup>-Ph,OMe,ax-a</b>                            | -1416.227757 | -1415.873694 | -32.0                       |
| <b>[Int-V·2H]<sup>2+</sup>-PyH<sup>+</sup>,Ph,ax-a</b>                | -1416.225502 | -1415.872779 | -31.4                       |
| <b>[BiPy·2H]<sup>2+</sup></b>                                         | -496.336457  | -496.190331  | -                           |
| <b>Phosph-Ph,Ph,OMe</b>                                               | -919.872786  | -919.695209  | -                           |
| <b>[BiPy·2H]<sup>2+</sup> +<br/>Phosph-Ph,Ph,OMe</b>                  | -1416.209243 | -1415.88554  | -37.1                       |
| <b>[PhPy·H]<sup>+</sup></b>                                           | -479.845825  | -479.701842  | -                           |
| <b>Phosph-PyH<sup>+</sup>,Ph,OMe</b>                                  | -936.369964  | -936.188787  | -                           |
| <b>[PhPy·H]<sup>+</sup> +<br/>Phosph-PyH<sup>+</sup>,Ph,OMe</b>       | -1416.215789 | -1415.890629 | -40.3                       |

**Table S21.** Thermochemical data including absolute energies, zero-point energies (ZPE), T·S and Gibbs free energies of MeO-Py couplings in  $[\text{TS-I-2H}]^{2+}$  at the  $\omega\text{B97X-D/6-31+G(d)}$  level. All values include quasi-harmonic corrections.

| System                                                      | E (hartree)  | ZPE (hartree) | T·S (hartree) | G (hartree)  |
|-------------------------------------------------------------|--------------|---------------|---------------|--------------|
| $[\text{TS-I-2H}]^{2+}\text{-Ph,OMe,ax-MeOPyH}^+$           | -1415.689234 | 0.416703      | 0.096262      | -1415.335433 |
| $[\text{TS-I-2H}]^{2+}\text{-PyH}^+\text{,OMe,ax-MeOPyH}^+$ | -1415.690099 | 0.416664      | 0.096017      | -1415.336133 |

**Table S22.** Absolute energies and Gibbs free energies of MeO-Py couplings in  $[\text{TS-I-2H}]^{2+}$  at the  $\text{DLPNO-CCSD(T)/cc-pV(DT)Z//}\omega\text{B97X-D/6-31+G(d)}$  level. All values include quasi-harmonic corrections.

| System                                                      | E (hartree)  | G (hartree)  | G <sub>rel</sub> (kcal/mol) |
|-------------------------------------------------------------|--------------|--------------|-----------------------------|
| $[\text{TS-I-2H}]^{2+}\text{-Ph,OMe,ax-MeOPyH}^+$           | -1414.191043 | -1413.837243 | 18.7                        |
| $[\text{TS-I-2H}]^{2+}\text{-PyH}^+\text{,OMe,ax-MeOPyH}^+$ | -1414.192949 | -1413.838983 | 17.6                        |

## 14. Cartesian Coordinates

### *Pathway Int-III*

#### **[Int-III]-Ph,OMe,ax-a**

|   |           |           |           |
|---|-----------|-----------|-----------|
| C | 2.315747  | -3.417517 | -1.115310 |
| C | 1.440619  | -2.344070 | -1.268153 |
| C | 1.282964  | -1.401310 | -0.245374 |
| C | 2.040581  | -1.546387 | 0.923994  |
| C | 2.944378  | -2.596978 | 1.060555  |
| H | 2.409980  | -4.148771 | -1.913493 |
| H | 0.889607  | -2.238012 | -2.195396 |
| H | 1.929633  | -0.842839 | 1.743166  |
| H | 3.535904  | -2.679936 | 1.968110  |
| P | 0.103553  | 0.015200  | -0.425152 |
| C | 0.797043  | 1.718886  | -0.282781 |
| C | 0.131824  | 2.804624  | -0.852873 |
| C | 2.014516  | 1.961707  | 0.350028  |
| C | 0.693003  | 4.071806  | -0.738183 |
| H | -0.804460 | 2.684519  | -1.388656 |
| C | 2.502326  | 3.264709  | 0.392182  |
| H | 2.591944  | 1.166153  | 0.809297  |
| H | 0.181518  | 4.931944  | -1.163249 |
| H | 3.455038  | 3.470747  | 0.874086  |
| C | -0.463581 | -0.078578 | 1.423789  |
| C | -0.497817 | 1.000784  | 2.310738  |
| C | -0.981181 | -1.303552 | 1.876946  |
| C | -1.014133 | 0.863610  | 3.604123  |
| H | -0.127338 | 1.977097  | 2.012236  |
| C | -1.495534 | -1.450693 | 3.160581  |
| H | -0.983283 | -2.168409 | 1.214802  |
| C | -1.512602 | -0.361156 | 4.035118  |
| H | -1.024238 | 1.722849  | 4.270440  |

|   |           |           |           |
|---|-----------|-----------|-----------|
| H | -1.884624 | -2.414332 | 3.480248  |
| H | -1.913300 | -0.469674 | 5.039681  |
| C | 3.075982  | -3.543191 | 0.045612  |
| H | 3.768879  | -4.372712 | 0.158371  |
| O | 0.392176  | 0.098425  | -2.197727 |
| C | -1.662043 | -0.231739 | -0.940527 |
| C | -2.063466 | -1.332623 | -1.696403 |
| C | -2.648482 | 0.666434  | -0.530024 |
| C | -3.413772 | -1.486498 | -1.996127 |
| H | -1.356386 | -2.073861 | -2.050402 |
| C | -3.966569 | 0.441733  | -0.911939 |
| H | -2.415883 | 1.530015  | 0.085700  |
| H | -3.745620 | -2.349535 | -2.568472 |
| H | -4.743073 | 1.143719  | -0.617917 |
| N | -4.362260 | -0.618230 | -1.626882 |
| C | 1.656341  | 0.420409  | -2.738894 |
| H | 1.772961  | -0.113523 | -3.689780 |
| H | 1.739225  | 1.499483  | -2.932265 |
| H | 2.489239  | 0.127041  | -2.084061 |
| N | 1.860360  | 4.315399  | -0.129664 |

**[Int-III]-Ph,OMe,ax-b**

|   |           |           |           |
|---|-----------|-----------|-----------|
| C | -1.655786 | -1.441348 | 3.080806  |
| C | -1.098831 | -1.296519 | 1.814272  |
| C | -0.475761 | -0.103184 | 1.412843  |
| C | -0.450491 | 0.949062  | 2.332521  |
| C | -1.008312 | 0.814050  | 3.608292  |
| H | -2.127844 | -2.380288 | 3.359672  |
| H | -1.157082 | -2.137873 | 1.124791  |
| H | -0.000212 | 1.901642  | 2.069296  |
| H | -0.970091 | 1.651461  | 4.300905  |
| P | 0.120136  | 0.027334  | -0.425527 |
| C | 1.138544  | -1.529096 | -0.286793 |
| C | 1.878955  | -1.807940 | 0.863866  |
| C | 1.192470  | -2.463300 | -1.321805 |
| C | 2.639809  | -2.971409 | 0.918334  |
| H | 1.870630  | -1.148047 | 1.724577  |
| C | 1.951826  | -3.618189 | -1.156129 |
| H | 0.664387  | -2.302764 | -2.253906 |
| H | 3.237631  | -3.186928 | 1.800369  |
| H | 1.983162  | -4.363592 | -1.947033 |
| C | 0.987554  | 1.635847  | -0.220801 |
| C | 2.158091  | 1.739137  | 0.534123  |
| C | 0.484804  | 2.771196  | -0.864056 |
| C | 2.815069  | 2.963359  | 0.648655  |
| H | 2.570951  | 0.872376  | 1.040904  |
| C | 1.127552  | 3.999458  | -0.725633 |
| H | -0.405080 | 2.705119  | -1.483666 |
| C | 2.296194  | 4.098366  | 0.028596  |
| H | 3.730940  | 3.027050  | 1.229856  |
| H | 0.718957  | 4.877014  | -1.219294 |
| H | 2.803032  | 5.054435  | 0.127446  |
| C | -1.610189 | -0.380997 | 3.988982  |
| H | -2.043574 | -0.487888 | 4.980060  |
| O | 0.430132  | 0.088733  | -2.193216 |

|   |           |           |           |           |           |
|---|-----------|-----------|-----------|-----------|-----------|
| C | -1.658472 | 0.000818  | -0.951131 |           |           |
| C | -2.191942 | -1.040811 | -1.709197 |           |           |
| C | -2.525386 | 1.015258  | -0.541136 |           |           |
| C | -3.550227 | -1.024406 | -2.012076 |           |           |
| H | -1.581141 | -1.864182 | -2.061816 |           |           |
| C | -3.860392 | 0.956158  | -0.925145 |           |           |
| H | -2.186980 | 1.843228  | 0.074691  |           |           |
| H | -3.986035 | -1.838245 | -2.586749 |           |           |
| H | -4.543890 | 1.749284  | -0.631866 |           |           |
| N | -4.383741 | -0.045276 | -1.642895 |           |           |
| C | 1.727756  | 0.291944  | -2.712007 |           |           |
| H | 1.817456  | -0.263891 | -3.653357 |           |           |
| H | 1.907392  | 1.356986  | -2.915165 |           |           |
| H | 2.520193  | -0.061484 | -2.036480 |           |           |
| N |           | 2.677613  |           | -3.878727 | -0.063806 |

**[Int-III]-Ph,Ph,ax-a**

|   |           |           |           |
|---|-----------|-----------|-----------|
| C | -1.325289 | 2.897121  | -2.172103 |
| C | -1.079356 | 1.648364  | -1.600273 |
| C | -0.342619 | 1.579541  | -0.408380 |
| C | 0.069193  | 2.783977  | 0.177633  |
| C | -0.263150 | 3.990160  | -0.443030 |
| H | -1.867526 | 2.967350  | -3.113062 |
| H | -1.474196 | 0.759171  | -2.082365 |
| H | 0.641302  | 2.798450  | 1.101338  |
| H | 0.030308  | 4.935309  | 0.009900  |
| P | 0.003468  | -0.023882 | 0.494490  |
| C | -1.902143 | -0.387529 | 0.462558  |
| C | -2.758176 | 0.562795  | 1.043801  |
| C | -2.493089 | -1.502361 | -0.138098 |
| C | -4.140452 | 0.409184  | 1.027844  |
| H | -2.339461 | 1.448046  | 1.520692  |
| C | -3.882867 | -1.663660 | -0.163989 |
| H | -1.883761 | -2.273826 | -0.599098 |
| H | -4.773883 | 1.163875  | 1.487770  |
| H | -4.311300 | -2.541174 | -0.642329 |
| C | 1.900688  | 0.407138  | 0.623832  |
| C | 2.539569  | 0.869463  | -0.538400 |
| C | 2.708199  | 0.164917  | 1.742288  |
| C | 3.914166  | 1.090012  | -0.583801 |
| H | 1.961354  | 1.065101  | -1.439229 |
| C | 4.088382  | 0.384755  | 1.707040  |
| H | 2.262843  | -0.202332 | 2.660279  |
| H | 4.372042  | 1.451504  | -1.501462 |
| H | 4.684359  | 0.189787  | 2.595711  |
| O | 0.051777  | -0.188779 | 2.140977  |
| C | 0.453284  | -1.486926 | -0.544166 |
| C | 0.521137  | -1.491713 | -1.939052 |
| C | 0.782749  | -2.668201 | 0.130810  |
| C | 0.905934  | -2.662872 | -2.588892 |
| H | 0.290177  | -0.612142 | -2.529941 |
| C | 1.149742  | -3.788849 | -0.609577 |
| H | 0.759468  | -2.731394 | 1.215578  |
| H | 0.967343  | -2.683963 | -3.674817 |
| H | 1.403067  | -4.716703 | -0.101381 |
| C | -0.832750 | -0.915831 | 2.996303  |
| H | -0.222548 | -1.226243 | 3.849056  |
| H | -1.647490 | -0.275937 | 3.345091  |
| H | -1.246314 | -1.801709 | 2.508785  |
| N | -0.936907 | 4.063710  | -1.611221 |
| N | 1.215094  | -3.804475 | -1.951239 |
| C | 4.698705  | 0.849253  | 0.544998  |
| H | 5.771685  | 1.021215  | 0.516144  |
| C | -4.711770 | -0.709953 | 0.417408  |
| H | -5.791509 | -0.833278 | 0.396867  |

**[Int-III]-Py,OMe,ax-a**

|   |           |           |           |
|---|-----------|-----------|-----------|
| C | 3.388156  | -1.685919 | -1.935969 |
| C | 2.045705  | -1.417462 | -1.672534 |
| C | 1.687543  | -0.322439 | -0.880950 |
| C | 2.692639  | 0.503716  | -0.366074 |
| C | 4.031175  | 0.255015  | -0.661335 |
| H | 3.652290  | -2.550879 | -2.538517 |
| H | 1.287341  | -2.072969 | -2.085863 |
| H | 2.442852  | 1.346589  | 0.272717  |
| H | 4.798172  | 0.917351  | -0.269165 |
| P | -0.080329 | 0.013633  | -0.457375 |
| C | 0.394446  | -0.076592 | 1.435516  |
| C | 0.859988  | -1.299687 | 1.939423  |
| C | 0.398908  | 0.990748  | 2.333134  |
| C | 1.278549  | -1.401477 | 3.257575  |
| H | 0.900258  | -2.185954 | 1.309317  |
| C | 0.840519  | 0.798424  | 3.643547  |
| H | 0.072577  | 1.985349  | 2.045770  |
| H | 1.635996  | -2.352057 | 3.647333  |
| H | 0.842880  | 1.633095  | 4.341794  |
| C | -1.329126 | -1.342776 | -0.273929 |
| C | -2.138215 | -1.419188 | 0.866957  |
| C | -1.488316 | -2.309288 | -1.274402 |
| C | -3.090525 | -2.426909 | 0.998667  |
| H | -2.033685 | -0.694143 | 1.668083  |
| C | -2.413554 | -3.340134 | -1.124873 |
| H | -0.901156 | -2.254218 | -2.183725 |
| C | -3.222744 | -3.398214 | 0.008110  |
| H | -3.720377 | -2.455967 | 1.883474  |
| H | -2.508702 | -4.090749 | -1.904734 |
| H | -3.954202 | -4.194376 | 0.117605  |
| C | 4.383794  | -0.846109 | -1.440094 |
| H | 5.428948  | -1.049979 | -1.656692 |
| O | -0.332988 | 0.079967  | -2.226774 |
| C | -0.686116 | 1.751566  | -0.345319 |
| C | -1.927993 | 2.061930  | 0.205941  |
| C | 0.076846  | 2.799303  | -0.861463 |
| C | -2.341858 | 3.390773  | 0.225332  |
| H | -2.580800 | 1.299506  | 0.618262  |
| C | -0.418539 | 4.096076  | -0.777580 |
| H | 1.040163  | 2.627003  | -1.331324 |
| H | -3.311146 | 3.649690  | 0.644543  |
| H | 0.168216  | 4.926684  | -1.162238 |
| N | -1.607981 | 4.404453  | -0.246114 |
| C | -1.575096 | 0.442944  | -2.792935 |
| H | -1.621269 | 1.525029  | -2.981440 |
| H | -1.684747 | -0.082209 | -3.749329 |
| H | -2.430840 | 0.170095  | -2.159187 |
| N | 1.274977  | -0.371159 | 4.118635  |

**[Int-III]-Py,OMe,ax-b**

|   |           |           |           |
|---|-----------|-----------|-----------|
| C | -0.118078 | 4.150337  | -0.720723 |
| C | 0.232478  | 2.807317  | -0.840690 |
| C | -0.566596 | 1.815648  | -0.262973 |
| C | -1.734352 | 2.183309  | 0.408878  |
| C | -2.095811 | 3.526231  | 0.507584  |
| H | 0.517222  | 4.912137  | -1.164358 |
| H | 1.127550  | 2.539109  | -1.394991 |
| H | -2.374612 | 1.432787  | 0.862093  |
| H | -3.012024 | 3.797493  | 1.025025  |
| P | -0.082297 | 0.053227  | -0.458960 |
| C | -1.422063 | -1.241686 | -0.349895 |
| C | -1.625763 | -2.165645 | -1.375779 |
| C | -2.263401 | -1.328250 | 0.761198  |
| C | -2.622764 | -3.127021 | -1.237361 |
| H | -1.033877 | -2.143299 | -2.282602 |
| C | -3.258509 | -2.300226 | 0.788779  |
| H | -2.161884 | -0.663965 | 1.612573  |
| H | -2.774225 | -3.865911 | -2.020361 |
| H | -3.933012 | -2.360433 | 1.639202  |
| C | 0.361578  | -0.203724 | 1.427081  |
| C | 0.715347  | -1.491104 | 1.856183  |
| C | 0.459660  | 0.803894  | 2.386502  |
| C | 1.118864  | -1.707933 | 3.165497  |
| H | 0.682410  | -2.339179 | 1.174912  |
| C | 0.877399  | 0.495585  | 3.682076  |
| H | 0.225605  | 1.838202  | 2.155279  |
| H | 1.389380  | -2.708075 | 3.497054  |
| H | 0.951797  | 1.283493  | 4.428997  |
| C | -1.284646 | 4.513370  | -0.048414 |
| H | -1.562744 | 5.560360  | 0.036581  |
| O | -0.326214 | 0.176598  | -2.223836 |
| C | 1.667254  | -0.362958 | -0.881840 |
| C | 2.703980  | 0.399708  | -0.332653 |
| C | 1.981173  | -1.451640 | -1.699941 |
| C | 4.032342  | 0.093397  | -0.618451 |
| H | 2.485736  | 1.237955  | 0.323743  |
| C | 3.312631  | -1.777569 | -1.955537 |
| H | 1.196976  | -2.057292 | -2.140523 |
| H | 4.825552  | 0.706658  | -0.199444 |
| H | 3.542374  | -2.636743 | -2.580039 |
| C | -1.538025 | 0.655988  | -2.768245 |
| H | -1.491300 | 1.740908  | -2.937674 |
| H | -1.705329 | 0.158103  | -3.730923 |
| H | -2.407987 | 0.450590  | -2.127860 |
| C | 4.341207  | -1.002029 | -1.423849 |
| H | 5.378002  | -1.250716 | -1.633684 |
| N | 1.203272  | -0.734803 | 4.086364  |
| N | -3.441111 | -3.201389 | -0.182431 |



**[Int-III]-Py,Ph,ax-a**

|   |           |           |           |
|---|-----------|-----------|-----------|
| C | 0.136943  | 4.007863  | -0.435808 |
| C | 0.330311  | 2.760870  | 0.156775  |
| C | -0.239177 | 1.613440  | -0.401705 |
| C | -1.011447 | 1.733358  | -1.562060 |
| C | -1.167399 | 2.971767  | -2.180235 |
| H | 0.570443  | 4.893654  | 0.020484  |
| H | 0.927356  | 2.690589  | 1.062548  |
| H | -1.508423 | 0.865451  | -1.985952 |
| H | -1.748718 | 3.046095  | -3.095308 |
| P | -0.028219 | -0.009151 | 0.479076  |
| C | 0.361665  | -1.490099 | -0.558736 |
| C | 0.338062  | -1.517663 | -1.951981 |
| C | 0.720352  | -2.661497 | 0.111025  |
| C | 0.672051  | -2.701065 | -2.603814 |
| H | 0.074280  | -0.645401 | -2.540469 |
| C | 1.024594  | -3.795919 | -0.633024 |
| H | 0.766392  | -2.705515 | 1.196056  |
| H | 0.667070  | -2.740330 | -3.690526 |
| H | 1.297112  | -4.719947 | -0.128778 |
| C | -1.941422 | -0.300113 | 0.444111  |
| C | -2.768339 | 0.716701  | 0.949676  |
| C | -2.565575 | -1.449194 | -0.049911 |
| C | -4.154207 | 0.595822  | 0.959913  |
| H | -2.323365 | 1.628140  | 1.346015  |
| C | -3.958633 | -1.577859 | -0.050466 |
| H | -1.979425 | -2.273845 | -0.444442 |
| C | -4.758365 | -0.557094 | 0.453188  |
| H | -4.764582 | 1.402063  | 1.359493  |
| H | -4.412839 | -2.482511 | -0.447574 |
| H | -5.840933 | -0.654967 | 0.452486  |
| C | -0.599120 | 4.113334  | -1.614493 |
| H | -0.736521 | 5.082101  | -2.087364 |
| O | 0.023360  | -0.178365 | 2.124082  |
| C | 1.913082  | 0.289658  | 0.626184  |
| C | 2.617531  | 0.610301  | -0.542852 |
| C | 2.693689  | 0.119681  | 1.772141  |
| C | 3.999211  | 0.743414  | -0.519380 |
| H | 2.101890  | 0.762914  | -1.488295 |
| C | 4.078246  | 0.275666  | 1.705020  |
| H | 2.243183  | -0.132754 | 2.725044  |
| H | 4.540057  | 0.992621  | -1.429974 |
| H | 4.682149  | 0.145889  | 2.601205  |
| N | 4.741934  | 0.582490  | 0.586028  |
| C | -0.915195 | -0.818037 | 2.991625  |
| H | -0.347736 | -1.068582 | 3.891995  |
| H | -1.733683 | -0.143013 | 3.253985  |
| H | -1.319493 | -1.734378 | 2.554919  |
| N | 1.006787  | -3.831648 | -1.971099 |

**[Int-III]-Py,Py,ax-a**

|   |           |           |           |
|---|-----------|-----------|-----------|
| C | -1.204604 | 2.937772  | -2.189234 |
| C | -1.028056 | 1.704357  | -1.566951 |
| C | -0.231894 | 1.596003  | -0.421158 |
| C | 0.338999  | 2.751526  | 0.119318  |
| C | 0.126290  | 3.993420  | -0.477495 |
| H | -1.804535 | 3.002141  | -3.092965 |
| H | -1.528442 | 0.831950  | -1.977369 |
| H | 0.952788  | 2.692222  | 1.014565  |
| H | 0.562639  | 4.884716  | -0.034869 |
| P | 0.004584  | -0.017209 | 0.472668  |
| C | -1.931172 | -0.273062 | 0.471654  |
| C | -2.749570 | 0.737574  | 0.995005  |
| C | -2.594000 | -1.391240 | -0.034814 |
| C | -4.129861 | 0.595068  | 0.988841  |
| H | -2.320215 | 1.647344  | 1.409364  |
| C | -3.988052 | -1.447078 | -0.006981 |
| H | -2.054946 | -2.233643 | -0.456805 |
| H | -4.763771 | 1.379353  | 1.396961  |
| H | -4.503784 | -2.317022 | -0.408705 |
| C | 1.934401  | 0.300056  | 0.607877  |
| C | 2.719407  | 0.184220  | 1.757203  |
| C | 2.630496  | 0.588085  | -0.574537 |
| C | 4.101478  | 0.358112  | 1.680060  |
| H | 2.274885  | -0.038953 | 2.720127  |
| C | 4.009840  | 0.742052  | -0.560102 |
| H | 2.108793  | 0.698215  | -1.522496 |
| H | 4.709369  | 0.271025  | 2.578688  |
| H | 4.544896  | 0.965404  | -1.480752 |
| C | -0.632903 | 4.086750  | -1.642221 |
| H | -0.785728 | 5.051468  | -2.118585 |
| O | 0.054200  | -0.188337 | 2.116879  |
| C | 0.348200  | -1.514998 | -0.541685 |
| C | 0.299717  | -1.543463 | -1.937304 |
| C | 0.686699  | -2.678368 | 0.157854  |
| C | 0.584879  | -2.723131 | -2.623584 |
| H | 0.048983  | -0.651657 | -2.503169 |
| C | 0.961059  | -3.858566 | -0.530337 |
| H | 0.741120  | -2.670877 | 1.244269  |
| H | 0.550255  | -2.732155 | -3.709772 |
| H | 1.217523  | -4.757108 | 0.024464  |
| C | -0.874730 | -0.843437 | 2.983696  |
| H | -0.296619 | -1.115486 | 3.870788  |
| H | -1.686197 | -0.170307 | 3.271766  |
| H | -1.288595 | -1.749669 | 2.534511  |
| C | 0.910422  | -3.883935 | -1.923475 |
| H | 1.127620  | -4.802878 | -2.461229 |
| N | 4.757641  | 0.633018  | 0.548578  |
| N | -4.762022 | -0.479526 | 0.492333  |

**[TS-I]-Ph,OMe,ax-a** ( $\nu_i = -513.72 \text{ cm}^{-1}$ )

|   |           |           |           |
|---|-----------|-----------|-----------|
| C | -3.754887 | 1.199015  | 1.167711  |
| C | -2.455609 | 1.241611  | 0.670706  |
| C | -1.978697 | 0.204970  | -0.140394 |
| C | -2.836859 | -0.849360 | -0.482370 |
| C | -4.134487 | -0.886423 | 0.021416  |
| H | -4.109775 | 2.007280  | 1.800473  |
| H | -1.833229 | 2.092998  | 0.919587  |
| H | -2.517129 | -1.645375 | -1.144720 |
| H | -4.785608 | -1.713768 | -0.245136 |
| P | -0.324515 | 0.287115  | -0.869618 |
| C | 0.645633  | -1.191595 | -0.860898 |
| C | 1.983961  | -1.065350 | -1.394332 |
| C | 0.141460  | -2.545958 | -0.917128 |
| C | 2.764957  | -2.191995 | -1.532909 |
| H | 2.416739  | -0.094033 | -1.610740 |
| C | 1.027337  | -3.581541 | -1.088376 |
| H | -0.894348 | -2.775422 | -0.703025 |
| H | 3.801630  | -2.072138 | -1.846586 |
| H | 0.647861  | -4.601244 | -1.035601 |
| C | 0.642330  | -0.748906 | 1.114436  |
| C | 1.923257  | -0.462702 | 1.584046  |
| C | -0.277765 | -1.310145 | 2.003545  |
| C | 2.273651  | -0.681700 | 2.916020  |
| H | 2.672900  | -0.064462 | 0.899872  |
| C | 0.060556  | -1.535717 | 3.339783  |
| H | -1.276994 | -1.583437 | 1.669493  |
| H | 3.277870  | -0.443620 | 3.260068  |
| H | -0.674992 | -1.961681 | 4.018823  |
| C | -4.593522 | 0.131206  | 0.854234  |
| H | -5.605490 | 0.098802  | 1.247840  |
| O | -0.623712 | 0.738550  | -2.419944 |
| C | 0.617121  | 1.792255  | -0.427853 |
| C | 0.698000  | 2.296198  | 0.871680  |
| C | 1.280196  | 2.487668  | -1.440275 |
| C | 1.422299  | 3.461996  | 1.093638  |
| H | 0.227852  | 1.801693  | 1.712644  |
| C | 1.997671  | 3.634140  | -1.107158 |
| H | 1.255006  | 2.155358  | -2.471001 |
| H | 1.487967  | 3.872666  | 2.097534  |
| H | 2.533380  | 4.178515  | -1.880282 |
| C | -1.281461 | -0.134893 | -3.346312 |
| H | -2.360453 | -0.138351 | -3.163012 |
| H | -1.082855 | 0.269404  | -4.340400 |
| H | -0.884980 | -1.153160 | -3.281909 |
| N | 2.349071  | -3.460811 | -1.354093 |
| C | 1.337142  | -1.215547 | 3.803184  |
| H | 1.603954  | -1.392573 | 4.842056  |
| N | 2.071557  | 4.127102  | 0.131733  |

**[TS-I]-Py,OMe,ax-a** ( $\nu_i = -506.35 \text{ cm}^{-1}$ )

|   |           |           |           |
|---|-----------|-----------|-----------|
| C | -4.112573 | -0.852588 | -0.465694 |
| C | -2.811696 | -0.649864 | -0.917767 |
| C | -1.725860 | -0.909059 | -0.070499 |
| C | -1.954313 | -1.413267 | 1.213013  |
| C | -3.256670 | -1.625716 | 1.654753  |
| H | -4.948642 | -0.639564 | -1.125264 |
| H | -2.651485 | -0.302792 | -1.934517 |
| H | -1.131383 | -1.642848 | 1.878527  |
| H | -3.424982 | -2.017158 | 2.653751  |
| P | -0.074295 | -0.624376 | -0.747385 |
| C | 1.288893  | -1.469167 | 0.104446  |
| C | 2.212948  | -2.137984 | -0.711621 |
| C | 1.465791  | -1.485685 | 1.493918  |
| C | 3.294924  | -2.807263 | -0.146159 |
| H | 2.096955  | -2.134043 | -1.790571 |
| C | 2.541178  | -2.167889 | 2.053743  |
| H | 0.789837  | -0.952091 | 2.150374  |
| H | 4.007739  | -3.312514 | -0.791275 |
| H | 2.665095  | -2.174080 | 3.132697  |
| C | 0.159769  | 1.309537  | 0.820695  |
| C | 1.348661  | 1.679281  | 1.445141  |
| C | -1.017970 | 1.797669  | 1.388413  |
| C | 1.316868  | 2.456796  | 2.598496  |
| H | 2.313034  | 1.373807  | 1.041091  |
| C | -0.959549 | 2.575166  | 2.541695  |
| H | -1.991794 | 1.590657  | 0.948289  |
| H | 2.242499  | 2.737099  | 3.098386  |
| H | -1.874859 | 2.950232  | 2.996498  |
| C | -4.336599 | -1.335245 | 0.822336  |
| H | -5.352090 | -1.494904 | 1.173913  |
| O | -0.144022 | -1.389799 | -2.188476 |
| C | 0.310746  | 1.043991  | -1.188543 |
| C | -0.666239 | 1.942955  | -1.752787 |
| C | 1.667031  | 1.350688  | -1.573240 |
| C | -0.245260 | 3.154381  | -2.250145 |
| H | -1.728075 | 1.733561  | -1.693827 |
| C | 1.951263  | 2.597894  | -2.082692 |
| H | 2.475605  | 0.650262  | -1.389530 |
| H | -0.995446 | 3.867433  | -2.589847 |
| H | 2.990004  | 2.854561  | -2.287854 |
| C | -0.593806 | -2.747680 | -2.322307 |
| H | -1.681402 | -2.764679 | -2.434306 |
| H | -0.121813 | -3.143226 | -3.223302 |
| H | -0.303080 | -3.357086 | -1.460874 |
| N | 0.184105  | 2.905340  | 3.158332  |
| N | 1.040904  | 3.542870  | -2.396128 |
| C | 3.458368  | -2.827454 | 1.236846  |
| H | 4.300387  | -3.353038 | 1.678547  |

**[TS-I]-Py,Ph,ax-a** ( $\nu_i = -420.54 \text{ cm}^{-1}$ )

|   |           |           |           |
|---|-----------|-----------|-----------|
| C | 4.565217  | 0.633785  | 0.467208  |
| C | 3.190821  | 0.801820  | 0.595559  |
| C | 2.316038  | -0.230838 | 0.226829  |
| C | 2.835787  | -1.429310 | -0.275480 |
| C | 4.214471  | -1.591669 | -0.406880 |
| H | 5.236538  | 1.437665  | 0.755464  |
| H | 2.799660  | 1.739516  | 0.983584  |
| H | 2.174689  | -2.239255 | -0.568056 |
| H | 4.610546  | -2.523052 | -0.801293 |
| P | 0.520029  | 0.006149  | 0.410440  |
| C | -0.354877 | -1.305757 | -0.400419 |
| C | -0.461155 | -2.575419 | 0.254366  |
| C | -0.513946 | -1.342295 | -1.821278 |
| C | -0.989592 | -3.639488 | -0.442585 |
| H | -0.205148 | -2.689277 | 1.303232  |
| C | -1.046642 | -2.476135 | -2.398652 |
| H | -0.294281 | -0.478993 | -2.440216 |
| H | -1.136569 | -4.587088 | 0.073381  |
| H | -1.240565 | -2.478590 | -3.470272 |
| C | 0.217351  | 1.669289  | -0.209187 |
| C | 0.682169  | 2.030929  | -1.477508 |
| C | -0.445655 | 2.603245  | 0.592227  |
| C | 0.450837  | 3.318861  | -1.955245 |
| H | 1.226856  | 1.319522  | -2.093017 |
| C | -0.655748 | 3.893407  | 0.116175  |
| H | -0.803953 | 2.323213  | 1.578088  |
| C | -0.216436 | 4.248821  | -1.159640 |
| H | 0.801233  | 3.595672  | -2.945315 |
| H | -1.168556 | 4.619868  | 0.739931  |
| H | -0.389295 | 5.254959  | -1.531528 |
| C | 5.077800  | -0.563625 | -0.035510 |
| H | 6.151715  | -0.692269 | -0.139742 |
| O | 0.230018  | -0.017705 | 1.984669  |
| C | -2.028112 | -0.169862 | 0.351366  |
| C | -2.716115 | -0.631621 | 1.473124  |
| C | -2.792189 | 0.495681  | -0.607397 |
| C | -4.083796 | -0.395847 | 1.599351  |
| H | -2.205230 | -1.185638 | 2.260421  |
| C | -4.155381 | 0.689201  | -0.405585 |
| H | -2.339937 | 0.869290  | -1.527284 |
| H | -4.624976 | -0.745934 | 2.477650  |
| H | -4.754923 | 1.214686  | -1.147883 |
| N | -4.811945 | 0.258465  | 0.682999  |
| C | 1.146944  | -0.551654 | 2.963690  |
| H | 1.969011  | 0.148199  | 3.128651  |
| H | 0.556751  | -0.657116 | 3.874434  |
| H | 1.531481  | -1.526182 | 2.655279  |
| N | -1.325537 | -3.624022 | -1.749662 |

**[Int-IV]-Py,Ph,ax-a**

|   |           |           |           |
|---|-----------|-----------|-----------|
| C | -0.713544 | 3.345354  | -1.814735 |
| C | -0.000283 | 2.278447  | -1.273699 |
| C | -0.458343 | 1.660220  | -0.104294 |
| C | -1.628980 | 2.111348  | 0.519276  |
| C | -2.329783 | 3.183150  | -0.023935 |
| H | -0.356402 | 3.825131  | -2.721268 |
| H | 0.908741  | 1.936839  | -1.760828 |
| H | -1.995805 | 1.628960  | 1.420407  |
| H | -3.234647 | 3.534756  | 0.463193  |
| P | 0.380628  | 0.199565  | 0.528817  |
| C | -1.859197 | -1.213564 | -0.030744 |
| C | -2.375796 | -1.463193 | 1.244140  |
| C | -2.765528 | -0.795564 | -1.005480 |
| C | -3.731790 | -1.273432 | 1.482900  |
| H | -1.745246 | -1.799435 | 2.060359  |
| C | -4.105714 | -0.633070 | -0.669860 |
| H | -2.450316 | -0.590359 | -2.022319 |
| H | -4.139407 | -1.461985 | 2.473263  |
| H | -4.815727 | -0.300120 | -1.423273 |
| C | 2.158886  | 0.408466  | 0.308872  |
| C | 2.999912  | -0.572721 | -0.225290 |
| C | 2.699595  | 1.614213  | 0.782854  |
| C | 4.371769  | -0.338980 | -0.294766 |
| H | 2.606795  | -1.512374 | -0.594972 |
| C | 4.069939  | 1.836925  | 0.711895  |
| H | 2.054037  | 2.380034  | 1.205476  |
| C | 4.906706  | 0.860283  | 0.170594  |
| H | 5.021358  | -1.101045 | -0.715519 |
| H | 4.482874  | 2.772784  | 1.076751  |
| H | 5.977326  | 1.036076  | 0.112213  |
| C | -1.875476 | 3.797445  | -1.191194 |
| H | -2.427991 | 4.631618  | -1.614644 |
| O | 0.088249  | 0.297057  | 2.112089  |
| C | -0.357580 | -1.364076 | -0.329444 |
| C | 0.220069  | -2.645358 | 0.210476  |
| C | 0.014995  | -1.248023 | -1.781889 |
| C | 1.018441  | -3.452690 | -0.544346 |
| H | -0.020256 | -2.941827 | 1.226644  |
| C | 0.845593  | -2.148279 | -2.388865 |
| H | -0.359716 | -0.410159 | -2.362265 |
| H | 1.392643  | -4.366683 | -0.080934 |
| H | 1.086715  | -1.979419 | -3.439556 |
| N | 1.407569  | -3.255930 | -1.836933 |
| C | 0.761291  | -0.550007 | 3.066380  |
| H | 0.602332  | -0.080775 | 4.037512  |
| H | 0.324542  | -1.550497 | 3.057954  |
| H | 1.832377  | -0.602905 | 2.850600  |
| N | -4.600531 | -0.858345 | 0.552526  |

**[TS-II]-Py,Ph,ax-a** ( $\nu_i = -141.39 \text{ cm}^{-1}$ )

|   |           |           |           |
|---|-----------|-----------|-----------|
| C | -0.956398 | 3.203774  | -1.856514 |
| C | -0.165043 | 2.202625  | -1.298211 |
| C | -0.537643 | 1.620270  | -0.080560 |
| C | -1.701954 | 2.044448  | 0.573102  |
| C | -2.481253 | 3.051212  | 0.012552  |
| H | -0.664550 | 3.654670  | -2.800606 |
| H | 0.739166  | 1.884468  | -1.809903 |
| H | -2.004519 | 1.588446  | 1.510986  |
| H | -3.381344 | 3.380459  | 0.523761  |
| P | 0.380842  | 0.210838  | 0.561551  |
| C | -1.806246 | -1.286974 | -0.059168 |
| C | -2.319883 | -1.509463 | 1.221960  |
| C | -2.711294 | -0.870639 | -1.036209 |
| C | -3.670774 | -1.292658 | 1.465378  |
| H | -1.688717 | -1.841346 | 2.039634  |
| C | -4.046134 | -0.678828 | -0.694918 |
| H | -2.399931 | -0.686742 | -2.058248 |
| H | -4.075669 | -1.458819 | 2.460825  |
| H | -4.754497 | -0.344466 | -1.449221 |
| C | 2.144854  | 0.521383  | 0.314207  |
| C | 3.033457  | -0.473825 | -0.105194 |
| C | 2.628897  | 1.795525  | 0.648771  |
| C | 4.393510  | -0.188340 | -0.205475 |
| H | 2.682658  | -1.467204 | -0.360188 |
| C | 3.988389  | 2.070953  | 0.550112  |
| H | 1.948352  | 2.573903  | 0.983981  |
| C | 4.870966  | 1.079660  | 0.119213  |
| H | 5.078485  | -0.962674 | -0.538643 |
| H | 4.357402  | 3.059835  | 0.806473  |
| H | 5.932430  | 1.297295  | 0.038168  |
| C | -2.112647 | 3.627657  | -1.203233 |
| H | -2.726982 | 4.409577  | -1.641082 |
| O | 0.102248  | 0.330325  | 2.154426  |
| C | -0.314872 | -1.458281 | -0.357017 |
| C | 0.268166  | -2.713791 | 0.194818  |
| C | 0.089427  | -1.315318 | -1.780806 |
| C | 1.172305  | -3.456374 | -0.509504 |
| H | -0.023877 | -3.041255 | 1.187853  |
| C | 1.025799  | -2.140361 | -2.346857 |
| H | -0.318226 | -0.505462 | -2.378217 |
| H | 1.569696  | -4.356098 | -0.038346 |
| H | 1.311898  | -1.946943 | -3.381559 |
| N | 1.629390  | -3.207843 | -1.768207 |
| C | 0.779441  | -0.538477 | 3.083846  |
| H | 0.528946  | -0.160171 | 4.075222  |
| H | 0.426336  | -1.566678 | 2.977417  |
| H | 1.862420  | -0.492844 | 2.933086  |
| N | -4.537464 | -0.876186 | 0.533658  |

**[Int-V]-Ph,OMe,ax-a**

|   |           |           |           |
|---|-----------|-----------|-----------|
| C | -5.038904 | 0.165013  | 0.572451  |
| C | -3.663563 | 0.311461  | 0.722801  |
| C | -2.840544 | 0.452385  | -0.403278 |
| C | -3.415246 | 0.444203  | -1.677441 |
| C | -4.794587 | 0.286092  | -1.829354 |
| H | -5.671660 | 0.058145  | 1.449604  |
| H | -3.227224 | 0.314609  | 1.719351  |
| H | -2.786544 | 0.562811  | -2.557592 |
| H | -5.232370 | 0.277293  | -2.823905 |
| P | -1.018408 | 0.667845  | -0.269244 |
| C | 2.675382  | 0.936262  | -0.321576 |
| C | 2.567161  | 1.315494  | 1.021022  |
| C | 2.872458  | 1.965041  | -1.250576 |
| C | 2.656379  | 2.659755  | 1.362704  |
| H | 2.396595  | 0.581994  | 1.801966  |
| C | 2.951474  | 3.280491  | -0.809142 |
| H | 2.987262  | 1.754258  | -2.309373 |
| H | 2.563099  | 2.960635  | 2.403590  |
| H | 3.111415  | 4.083317  | -1.525095 |
| C | 2.583667  | -0.485927 | -0.740713 |
| C | 3.028032  | -1.512198 | 0.103732  |
| C | 2.040135  | -0.830019 | -1.985856 |
| C | 2.937824  | -2.844919 | -0.289155 |
| H | 3.464896  | -1.272445 | 1.069366  |
| C | 1.950206  | -2.163044 | -2.378654 |
| H | 1.661942  | -0.055222 | -2.647147 |
| H | 3.289125  | -3.626462 | 0.379087  |
| H | 1.517215  | -2.410239 | -3.344334 |
| C | -5.605334 | 0.148678  | -0.705352 |
| H | -6.679476 | 0.029887  | -0.820784 |
| O | -0.885525 | 1.780271  | 0.964079  |
| C | -0.612172 | -0.829699 | 0.712539  |
| C | -0.742228 | -2.083679 | 0.108934  |
| C | -0.119583 | -0.787391 | 2.016653  |
| C | -0.382884 | -3.218364 | 0.825100  |
| H | -1.114109 | -2.187757 | -0.907502 |
| C | 0.214087  | -1.982761 | 2.648335  |
| H | 0.006584  | 0.152852  | 2.542203  |
| H | -0.474688 | -4.201334 | 0.369490  |
| H | 0.599070  | -1.969034 | 3.665511  |
| C | -0.778255 | 3.147327  | 0.561754  |
| H | -1.739186 | 3.516175  | 0.182503  |
| H | -0.500181 | 3.717257  | 1.450845  |
| H | -0.009098 | 3.274588  | -0.209133 |
| N | 2.848264  | 3.643915  | 0.475749  |
| C | 2.399477  | -3.175522 | -1.532153 |
| H | 2.324868  | -4.216195 | -1.836027 |
| N | 0.091008  | -3.186351 | 2.078074  |



**[Int-V]-Ph,OMe,ax-b**

|   |           |           |           |
|---|-----------|-----------|-----------|
| C | -4.828339 | -0.918902 | -0.081358 |
| C | -3.543346 | -0.570044 | 0.324380  |
| C | -2.753823 | 0.278384  | -0.465639 |
| C | -3.279602 | 0.765892  | -1.669060 |
| C | -4.567678 | 0.417711  | -2.076340 |
| H | -5.430620 | -1.576654 | 0.539628  |
| H | -3.156043 | -0.964405 | 1.260146  |
| H | -2.677724 | 1.419675  | -2.296954 |
| H | -4.961343 | 0.800891  | -3.013803 |
| P | -1.057039 | 0.836743  | -0.028912 |
| C | 2.578650  | 1.087398  | -0.552443 |
| C | 2.594349  | 1.518286  | 0.778452  |
| C | 2.513336  | 2.081805  | -1.535183 |
| C | 2.519900  | 2.877425  | 1.058641  |
| H | 2.636518  | 0.810357  | 1.599380  |
| C | 2.446560  | 3.416299  | -1.154131 |
| H | 2.522337  | 1.831206  | -2.591588 |
| H | 2.514321  | 3.217829  | 2.091485  |
| H | 2.393928  | 4.194631  | -1.911902 |
| C | 2.598624  | -0.355126 | -0.903750 |
| C | 3.278436  | -1.282816 | -0.103467 |
| C | 1.915153  | -0.818265 | -2.036548 |
| C | 3.280195  | -2.636181 | -0.431293 |
| H | 3.824913  | -0.947550 | 0.773921  |
| C | 1.917709  | -2.171736 | -2.364052 |
| H | 1.355411  | -0.121886 | -2.655166 |
| H | 3.814266  | -3.340886 | 0.200417  |
| H | 1.374196  | -2.513032 | -3.241116 |
| C | -5.342249 | -0.425024 | -1.282111 |
| H | -6.344936 | -0.701042 | -1.597724 |
| O | -1.282109 | 1.992150  | 1.144375  |
| C | -0.454401 | -0.605058 | 0.945936  |
| C | -0.478401 | -1.890573 | 0.396513  |
| C | 0.178513  | -0.447034 | 2.179907  |
| C | 0.109739  | -2.937446 | 1.095856  |
| H | -0.945809 | -2.087604 | -0.564670 |
| C | 0.735477  | -1.559829 | 2.803314  |
| H | 0.247617  | 0.524827  | 2.659479  |
| H | 0.098384  | -3.942474 | 0.681090  |
| H | 1.227449  | -1.452323 | 3.767367  |
| C | -2.269015 | 1.872273  | 2.173586  |
| H | -2.216716 | 0.900054  | 2.675174  |
| H | -2.059238 | 2.663767  | 2.896745  |
| H | -3.271903 | 2.014478  | 1.757841  |
| N | 2.442196  | 3.829086  | 0.120177  |
| C | 2.600921  | -3.085699 | -1.563113 |
| H | 2.599660  | -4.142660 | -1.815570 |
| N | 0.709737  | -2.792797 | 2.284957  |

**[Int-V]-Py,OMe,ax-a**

|   |           |           |           |
|---|-----------|-----------|-----------|
| C | 0.423761  | -1.650182 | 2.682169  |
| C | -0.106699 | -0.611322 | 1.915987  |
| C | -0.473916 | -0.834580 | 0.586604  |
| C | -0.304767 | -2.111563 | 0.036191  |
| C | 0.216199  | -3.149407 | 0.803599  |
| H | 0.711843  | -1.463593 | 3.713683  |
| H | -0.224123 | 0.374718  | 2.354580  |
| H | -0.573466 | -2.297837 | -1.002381 |
| H | 0.347261  | -4.133837 | 0.362380  |
| P | -1.134663 | 0.472949  | -0.517270 |
| C | -2.934865 | 0.084655  | -0.430504 |
| C | -3.617270 | -0.186701 | -1.619650 |
| C | -3.636670 | 0.064321  | 0.782408  |
| C | -4.980783 | -0.489293 | -1.600047 |
| H | -3.084800 | -0.162007 | -2.568433 |
| C | -4.997839 | -0.224043 | 0.802132  |
| H | -3.115677 | 0.273890  | 1.714320  |
| H | -5.501785 | -0.703726 | -2.529428 |
| H | -5.536275 | -0.235535 | 1.746222  |
| C | 2.729024  | -0.230023 | -0.662953 |
| C | 2.266988  | -0.701094 | -1.896132 |
| C | 3.383765  | -1.148218 | 0.162860  |
| C | 2.477728  | -2.031154 | -2.238514 |
| H | 1.723835  | -0.059195 | -2.582123 |
| C | 3.541914  | -2.460067 | -0.269224 |
| H | 3.784063  | -0.857917 | 1.128915  |
| H | 2.117065  | -2.408542 | -3.192301 |
| H | 4.047877  | -3.182316 | 0.366848  |
| C | 0.586824  | -2.918988 | 2.129460  |
| H | 1.005786  | -3.725037 | 2.726095  |
| O | -1.014554 | 1.753904  | 0.547734  |
| C | 2.514974  | 1.178772  | -0.242231 |
| C | 2.422787  | 1.530747  | 1.107468  |
| C | 2.379675  | 2.209590  | -1.177770 |
| C | 2.197994  | 2.858392  | 1.451443  |
| H | 2.495562  | 0.786824  | 1.893547  |
| C | 2.161157  | 3.508300  | -0.732737 |
| H | 2.458144  | 2.022616  | -2.244077 |
| H | 2.112947  | 3.139640  | 2.498308  |
| H | 2.057080  | 4.317086  | -1.451984 |
| C | -1.374528 | 3.030953  | 0.023995  |
| H | -2.456062 | 3.088621  | -0.153657 |
| H | -1.095258 | 3.771908  | 0.775960  |
| H | -0.841767 | 3.243233  | -0.911329 |
| N | 3.104861  | -2.912818 | -1.450291 |
| N | 2.067915  | 3.846907  | 0.558742  |
| C | -5.670824 | -0.505488 | -0.390291 |
| H | -6.733085 | -0.734728 | -0.372699 |

**[Int-V]-Py,OMe,ax-b**

|   |           |           |           |
|---|-----------|-----------|-----------|
| C | 4.606564  | 0.574220  | -2.014765 |
| C | 3.299621  | 0.867371  | -1.624281 |
| C | 2.756709  | 0.306562  | -0.461125 |
| C | 3.549268  | -0.560359 | 0.304869  |
| C | 4.853107  | -0.855542 | -0.083927 |
| H | 5.013170  | 1.014926  | -2.921018 |
| H | 2.695896  | 1.536474  | -2.234256 |
| H | 3.148079  | -1.011748 | 1.208467  |
| H | 5.457124  | -1.528766 | 0.518681  |
| P | 1.036113  | 0.803796  | -0.033600 |
| C | 0.457795  | -0.664801 | 0.913485  |
| C | -0.161808 | -0.531830 | 2.159828  |
| C | 0.498533  | -1.929718 | 0.310894  |
| C | -0.712700 | -1.642283 | 2.800579  |
| H | -0.220440 | 0.442639  | 2.637814  |
| C | -0.054910 | -3.037014 | 0.947427  |
| H | 0.964327  | -2.055860 | -0.664429 |
| H | -1.186449 | -1.522301 | 3.771575  |
| H | -0.017722 | -4.009838 | 0.464500  |
| C | -2.590672 | -0.334576 | -0.913680 |
| C | -3.234717 | -1.309284 | -0.147201 |
| C | -1.915521 | -0.764871 | -2.060182 |
| C | -3.181233 | -2.637253 | -0.555440 |
| H | -3.786145 | -1.049093 | 0.751017  |
| C | -1.921834 | -2.116378 | -2.383861 |
| H | -1.368114 | -0.068554 | -2.687788 |
| H | -3.679025 | -3.405177 | 0.031640  |
| H | -1.396147 | -2.464387 | -3.269825 |
| C | 5.383846  | -0.287873 | -1.244027 |
| H | 6.401201  | -0.521518 | -1.546746 |
| O | 1.231737  | 1.953846  | 1.155710  |
| C | -2.598115 | 1.096232  | -0.518905 |
| C | -2.562775 | 2.117593  | -1.472875 |
| C | -2.610978 | 1.477742  | 0.825370  |
| C | -2.525925 | 3.440672  | -1.048838 |
| H | -2.572307 | 1.898515  | -2.536197 |
| C | -2.563715 | 2.828879  | 1.148120  |
| H | -2.628988 | 0.740300  | 1.620785  |
| H | -2.498933 | 4.244747  | -1.780320 |
| H | -2.555023 | 3.137334  | 2.190698  |
| C | 2.219205  | 1.842596  | 2.184265  |
| H | 3.215849  | 2.046235  | 1.778576  |
| H | 1.972082  | 2.596673  | 2.935466  |
| H | 2.212305  | 0.851835  | 2.650846  |
| N | -2.543143 | -3.052537 | -1.656240 |
| N | -2.519043 | 3.809651  | 0.238383  |
| C | -0.662016 | -2.896639 | 2.196337  |
| H | -1.097401 | -3.760620 | 2.691427  |

**[Int-V]-Py,Ph,ax-a**

|   |           |           |           |
|---|-----------|-----------|-----------|
| C | -0.962812 | -1.353586 | 2.717852  |
| C | -0.072042 | -1.095700 | 1.675255  |
| C | -0.332006 | -1.571050 | 0.385925  |
| C | -1.507355 | -2.301806 | 0.157703  |
| C | -2.387616 | -2.572338 | 1.201224  |
| H | -0.747778 | -0.974873 | 3.713765  |
| H | 0.826050  | -0.519224 | 1.877730  |
| H | -1.740373 | -2.661962 | -0.842069 |
| H | -3.292821 | -3.142013 | 1.008667  |
| P | 0.729887  | -1.194750 | -1.063569 |
| C | -2.155403 | 1.390310  | -0.371867 |
| C | -2.443032 | 0.807749  | -1.610145 |
| C | -3.039266 | 1.126997  | 0.677988  |
| C | -3.575563 | 0.012954  | -1.739611 |
| H | -1.789620 | 0.946237  | -2.465474 |
| C | -4.146373 | 0.318338  | 0.446551  |
| H | -2.888735 | 1.553647  | 1.664769  |
| H | -3.806350 | -0.450427 | -2.695835 |
| H | -4.841978 | 0.108369  | 1.255319  |
| C | 2.291499  | -0.658874 | -0.263181 |
| C | 2.678978  | 0.676045  | -0.406855 |
| C | 3.103210  | -1.533221 | 0.471796  |
| C | 3.846165  | 1.143896  | 0.198623  |
| H | 2.065872  | 1.357779  | -0.993080 |
| C | 4.276776  | -1.072264 | 1.061492  |
| H | 2.813360  | -2.575015 | 0.586336  |
| C | 4.645950  | 0.269270  | 0.930932  |
| H | 4.131048  | 2.187094  | 0.090739  |
| H | 4.902522  | -1.756028 | 1.629226  |
| H | 5.559409  | 0.628686  | 1.397545  |
| C | -2.118570 | -2.095247 | 2.484942  |
| H | -2.811766 | -2.296231 | 3.297511  |
| O | 1.071597  | -2.787983 | -1.465847 |
| C | -0.961384 | 2.252657  | -0.179350 |
| C | -0.457353 | 3.043810  | -1.216769 |
| C | -0.298078 | 2.316358  | 1.049745  |
| C | 0.651445  | 3.849071  | -0.980135 |
| H | -0.927010 | 3.062418  | -2.195341 |
| C | 0.807438  | 3.148527  | 1.183857  |
| H | -0.617976 | 1.718438  | 1.896553  |
| H | 1.045800  | 4.475937  | -1.776207 |
| H | 1.336533  | 3.197867  | 2.132411  |
| N | 1.286045  | 3.914933  | 0.196658  |
| C | 1.741735  | -2.977844 | -2.712077 |
| H | 1.782197  | -4.055228 | -2.888017 |
| H | 1.195534  | -2.495821 | -3.532745 |
| H | 2.764397  | -2.581996 | -2.673930 |
| N | -4.428538 | -0.235913 | -0.738219 |

*Pathway [Int-III·H]<sup>+</sup>*

**[Int-III·H]<sup>+</sup>-Ph,OMe,ax-a**

|   |           |           |           |
|---|-----------|-----------|-----------|
| C | -2.015260 | 0.324709  | 3.206934  |
| C | -1.539885 | 0.497267  | 1.912042  |
| C | -0.424321 | -0.211756 | 1.435903  |
| C | 0.186907  | -1.114638 | 2.309274  |
| C | -0.285720 | -1.296272 | 3.613826  |
| H | -2.879159 | 0.891229  | 3.545279  |
| H | -2.052448 | 1.203402  | 1.260036  |
| H | 1.041222  | -1.708341 | 1.998258  |
| H | 0.212295  | -2.006615 | 4.269174  |
| P | 0.051381  | 0.058446  | -0.412929 |
| C | 1.586310  | -0.981852 | -0.299232 |
| C | 2.755647  | -0.476444 | 0.274797  |
| C | 1.603619  | -2.267625 | -0.850646 |
| C | 3.896856  | -1.251849 | 0.288134  |
| H | 2.798839  | 0.512980  | 0.715493  |
| C | 2.761788  | -3.012968 | -0.798171 |
| H | 0.734056  | -2.697076 | -1.334488 |
| H | 4.839961  | -0.925817 | 0.708254  |
| H | 2.849964  | -4.016545 | -1.194710 |
| C | 0.259626  | 1.884599  | -0.223810 |
| C | -0.120278 | 2.759986  | -1.248961 |
| C | 0.804540  | 2.419025  | 0.950824  |
| C | 0.016592  | 4.136938  | -1.090774 |
| H | -0.518410 | 2.371112  | -2.178768 |
| C | 0.977478  | 3.793590  | 1.091954  |
| H | 1.095487  | 1.769559  | 1.770366  |
| C | 0.572498  | 4.657473  | 0.076323  |
| H | -0.302920 | 4.801323  | -1.888762 |
| H | 1.417007  | 4.187158  | 2.004162  |
| H | 0.690900  | 5.731235  | 0.193556  |
| C | -1.385258 | -0.577217 | 4.068437  |
| H | -1.753339 | -0.717061 | 5.081418  |
| O | 0.361487  | 0.129834  | -2.173417 |
| C | -1.567562 | -0.688064 | -0.931115 |
| C | -1.926919 | -1.960814 | -0.486660 |
| C | -2.481224 | 0.004322  | -1.724800 |
| C | -3.153546 | -2.489173 | -0.874730 |
| H | -1.278653 | -2.544802 | 0.159947  |
| C | -3.699662 | -0.597351 | -2.025351 |
| H | -2.274742 | 0.998035  | -2.104669 |
| H | -3.438348 | -3.488712 | -0.555673 |
| H | -4.433175 | -0.063048 | -2.624197 |
| N | -4.041749 | -1.827079 | -1.624606 |
| C | 1.578556  | 0.593007  | -2.727263 |
| H | 2.248956  | -0.248086 | -2.953431 |
| H | 1.353744  | 1.120051  | -3.661643 |
| H | 2.111927  | 1.290236  | -2.066694 |
| N | 3.863938  | -2.486817 | -0.236687 |
| H | 4.714204  | -3.047675 | -0.214176 |

**[Int-III·H]<sup>+</sup>-Ph,Ph,ax-a**

|   |           |           |           |
|---|-----------|-----------|-----------|
| C | -1.453349 | 2.873058  | -2.183898 |
| C | -1.173336 | 1.640021  | -1.603863 |
| C | -0.445528 | 1.606483  | -0.415476 |
| C | -0.073909 | 2.821583  | 0.156785  |
| C | -0.441370 | 4.004539  | -0.477899 |
| H | -1.994040 | 2.920395  | -3.125850 |
| H | -1.536411 | 0.733831  | -2.079127 |
| H | 0.492037  | 2.863845  | 1.082970  |
| H | -0.180432 | 4.962991  | -0.036021 |
| P | -0.045404 | 0.035315  | 0.503519  |
| C | -1.904883 | -0.485082 | 0.425297  |
| C | -2.855389 | 0.432952  | 0.903219  |
| C | -2.380740 | -1.693896 | -0.090247 |
| C | -4.217916 | 0.158368  | 0.868930  |
| H | -2.529256 | 1.387188  | 1.313651  |
| C | -3.750324 | -1.976772 | -0.133978 |
| H | -1.700238 | -2.450079 | -0.469406 |
| H | -4.926112 | 0.890599  | 1.248570  |
| H | -4.088058 | -2.925192 | -0.544292 |
| C | 1.839291  | 0.509517  | 0.624972  |
| C | 2.473164  | 0.962376  | -0.542408 |
| C | 2.641993  | 0.304976  | 1.754153  |
| C | 3.842641  | 1.212883  | -0.583002 |
| H | 1.896248  | 1.129486  | -1.450018 |
| C | 4.016818  | 0.552383  | 1.722252  |
| H | 2.196920  | -0.052203 | 2.676440  |
| H | 4.298825  | 1.568405  | -1.503662 |
| H | 4.611627  | 0.387416  | 2.617545  |
| O | -0.023614 | -0.027447 | 2.148760  |
| C | 0.526379  | -1.435865 | -0.495974 |
| C | 0.573327  | -1.482423 | -1.892272 |
| C | 0.988563  | -2.538310 | 0.234842  |
| C | 1.082129  | -2.602551 | -2.515655 |
| H | 0.229626  | -0.660385 | -2.508770 |
| C | 1.477852  | -3.639762 | -0.431569 |
| H | 0.976954  | -2.549023 | 1.320321  |
| H | 1.158951  | -2.709637 | -3.590374 |
| H | 1.848788  | -4.528618 | 0.063058  |
| C | -0.916211 | -0.687390 | 3.051173  |
| H | -0.318486 | -0.903327 | 3.940566  |
| H | -1.747282 | -0.031118 | 3.320125  |
| H | -1.302262 | -1.622509 | 2.639881  |
| N | -1.106721 | 4.044868  | -1.637581 |
| N | 1.512976  | -3.637760 | -1.775551 |
| C | 4.623845  | 1.008480  | 0.554739  |
| H | 5.693023  | 1.202612  | 0.529318  |
| C | -4.673437 | -1.053453 | 0.344438  |
| H | -5.737681 | -1.271302 | 0.310690  |
| H | 1.885784  | -4.455971 | -2.253921 |

**[Int-III·H]<sup>+</sup>-Py,OMe,ax-a**

|   |           |           |           |
|---|-----------|-----------|-----------|
| C | -3.174512 | -2.570094 | 0.754661  |
| C | -2.340498 | -1.458802 | 0.652652  |
| C | -1.277794 | -1.455524 | -0.254753 |
| C | -1.057217 | -2.581571 | -1.054333 |
| C | -1.871497 | -3.704814 | -0.927008 |
| H | -4.006899 | -2.552897 | 1.452713  |
| H | -2.530139 | -0.600836 | 1.289496  |
| H | -0.255709 | -2.584812 | -1.787709 |
| H | -1.680285 | -4.578813 | -1.543441 |
| P | -0.189143 | 0.016634  | -0.432217 |
| C | 1.595835  | -0.175962 | -0.936694 |
| C | 2.315702  | 0.909403  | -1.448940 |
| C | 2.257109  | -1.395623 | -0.749435 |
| C | 3.651257  | 0.755886  | -1.753348 |
| H | 1.855825  | 1.876625  | -1.612891 |
| C | 3.588644  | -1.506542 | -1.084722 |
| H | 1.753830  | -2.261485 | -0.333489 |
| H | 4.272561  | 1.550407  | -2.147103 |
| H | 4.162343  | -2.418068 | -0.975036 |
| C | 0.483089  | -0.045156 | 1.398528  |
| C | 0.440169  | -1.175108 | 2.217396  |
| C | 1.215544  | 1.042666  | 1.892701  |
| C | 1.086358  | -1.163267 | 3.453239  |
| H | -0.083933 | -2.077814 | 1.920136  |
| C | 1.828304  | 0.965474  | 3.136460  |
| H | 1.319495  | 1.960720  | 1.318781  |
| H | 1.048110  | -2.042140 | 4.093334  |
| H | 2.391958  | 1.812353  | 3.521538  |
| C | -2.935585 | -3.699375 | -0.026582 |
| H | -3.579615 | -4.569959 | 0.062368  |
| O | -0.424797 | 0.037077  | -2.183831 |
| C | -0.952759 | 1.685874  | -0.218802 |
| C | -1.621324 | 2.020506  | 0.966045  |
| C | -0.877079 | 2.639189  | -1.241072 |
| C | -2.218787 | 3.269046  | 1.114771  |
| H | -1.678475 | 1.316953  | 1.790299  |
| C | -1.441973 | 3.902089  | -1.076344 |
| H | -0.378192 | 2.397519  | -2.172756 |
| H | -2.749077 | 3.502721  | 2.033693  |
| H | -1.356747 | 4.634734  | -1.874097 |
| C | -1.713147 | 0.048158  | -2.771973 |
| H | -2.498290 | 0.351800  | -2.066618 |
| H | -1.712235 | 0.759179  | -3.606408 |
| H | -1.965242 | -0.948507 | -3.156144 |
| C | -2.122369 | 4.217341  | 0.097635  |
| H | -2.574943 | 5.197494  | 0.220737  |
| N | 1.772866  | -0.118059 | 3.924003  |
| N | 4.242602  | -0.436344 | -1.568097 |
| H | 5.228051  | -0.533250 | -1.805342 |

**[Int-III·H]<sup>+</sup>-Py,OMe,ax-b**

|   |           |           |           |
|---|-----------|-----------|-----------|
| C | 2.862120  | 3.063058  | -0.559659 |
| C | 2.194321  | 1.847885  | -0.692762 |
| C | 0.885920  | 1.707970  | -0.218438 |
| C | 0.245560  | 2.805694  | 0.360742  |
| C | 0.909305  | 4.026524  | 0.473378  |
| H | 3.882356  | 3.155786  | -0.921618 |
| H | 2.699176  | 1.015520  | -1.174960 |
| H | -0.771727 | 2.727649  | 0.730618  |
| H | 0.397446  | 4.874507  | 0.919849  |
| P | 0.045123  | 0.092238  | -0.453987 |
| C | -1.841441 | 0.043140  | -0.467336 |
| C | -2.522814 | -0.594722 | -1.507915 |
| C | -2.592113 | 0.619047  | 0.563267  |
| C | -3.901605 | -0.661070 | -1.488287 |
| H | -1.996899 | -1.031605 | -2.345922 |
| C | -3.970293 | 0.563782  | 0.524788  |
| H | -2.127831 | 1.104267  | 1.413177  |
| H | -4.490486 | -1.154306 | -2.251192 |
| H | -4.610887 | 1.003761  | 1.278525  |
| C | 0.011963  | -0.384188 | 1.435431  |
| C | -0.614776 | -1.583123 | 1.803582  |
| C | 0.619767  | 0.330042  | 2.467000  |
| C | -0.618417 | -1.990911 | 3.129738  |
| H | -1.101489 | -2.216349 | 1.063485  |
| C | 0.568672  | -0.157906 | 3.773745  |
| H | 1.146502  | 1.261257  | 2.285099  |
| H | -1.106557 | -2.919837 | 3.415968  |
| H | 1.043221  | 0.399344  | 4.578716  |
| C | 2.221048  | 4.156069  | 0.022038  |
| H | 2.740028  | 5.105783  | 0.117850  |
| O | 0.016641  | 0.336128  | -2.208166 |
| C | 1.095015  | -1.387560 | -0.797794 |
| C | 2.275989  | -1.555504 | -0.064838 |
| C | 0.736469  | -2.353545 | -1.742238 |
| C | 3.094828  | -2.659010 | -0.289539 |
| H | 2.571891  | -0.825027 | 0.683120  |
| C | 1.538695  | -3.477103 | -1.937297 |
| H | -0.166014 | -2.244458 | -2.332315 |
| H | 4.018884  | -2.763281 | 0.272319  |
| H | 1.237809  | -4.228869 | -2.661801 |
| C | -0.522939 | 1.509482  | -2.784117 |
| H | 0.248547  | 2.283803  | -2.890600 |
| H | -0.907277 | 1.254341  | -3.778198 |
| H | -1.352187 | 1.935114  | -2.200320 |
| C | 2.722778  | -3.629361 | -1.218919 |
| H | 3.353060  | -4.499223 | -1.382517 |
| N | -0.039072 | -1.295338 | 4.120244  |
| N | -4.576868 | -0.078370 | -0.485927 |
| H | -5.594278 | -0.126957 | -0.491793 |



**[Int-III·H]<sup>+</sup>-Py,OMe,ax-c**

|   |           |           |           |
|---|-----------|-----------|-----------|
| C | -3.762729 | 0.558232  | -1.982109 |
| C | -2.399048 | 0.700994  | -1.732341 |
| C | -1.750490 | -0.165540 | -0.847013 |
| C | -2.485146 | -1.184084 | -0.229362 |
| C | -3.839252 | -1.348879 | -0.511326 |
| H | -4.257424 | 1.251173  | -2.657183 |
| H | -1.854768 | 1.495533  | -2.229660 |
| H | -2.010172 | -1.858541 | 0.477905  |
| H | -4.390448 | -2.156619 | -0.037886 |
| P | 0.042095  | 0.031955  | -0.445995 |
| C | 1.113672  | -1.478257 | -0.324811 |
| C | 2.428789  | -1.396263 | 0.141086  |
| C | 0.630180  | -2.714191 | -0.768246 |
| C | 3.215321  | -2.529683 | 0.163315  |
| H | 2.857361  | -0.465115 | 0.492410  |
| C | 1.447420  | -3.822491 | -0.715046 |
| H | -0.372389 | -2.830058 | -1.163924 |
| H | 4.241951  | -2.542050 | 0.506542  |
| H | 1.141904  | -4.811645 | -1.031987 |
| C | -0.382506 | 0.013950  | 1.453510  |
| C | -1.187244 | 1.051727  | 1.944572  |
| C | -0.017654 | -0.964248 | 2.377567  |
| C | -1.566386 | 1.071128  | 3.278263  |
| H | -1.526570 | 1.854523  | 1.293179  |
| C | -0.447197 | -0.865036 | 3.702566  |
| H | 0.592756  | -1.820182 | 2.107521  |
| H | -2.188466 | 1.877893  | 3.659108  |
| H | -0.161401 | -1.629266 | 4.422296  |
| C | -4.484436 | -0.471358 | -1.380823 |
| H | -5.544851 | -0.588062 | -1.587297 |
| O | 0.309067  | -0.039176 | -2.204994 |
| C | 0.866242  | 1.683401  | -0.315969 |
| C | 1.645865  | 2.012009  | 0.800390  |
| C | 0.722389  | 2.628792  | -1.338491 |
| C | 2.272914  | 3.252410  | 0.888038  |
| H | 1.775002  | 1.305849  | 1.614614  |
| C | 1.317078  | 3.883707  | -1.231411 |
| H | 0.155642  | 2.387081  | -2.230112 |
| H | 2.887229  | 3.481690  | 1.754207  |
| H | 1.176896  | 4.611453  | -2.025803 |
| C | 1.596795  | -0.011599 | -2.790771 |
| H | 1.951880  | -1.031323 | -2.995684 |
| H | 1.531777  | 0.532665  | -3.739813 |
| H | 2.343348  | 0.493852  | -2.162762 |
| C | 2.098752  | 4.197323  | -0.121226 |
| H | 2.572834  | 5.171974  | -0.044332 |
| N | -1.207408 | 0.129226  | 4.165138  |
| N | 2.704111  | -3.698206 | -0.254453 |
| H | 3.297059  | -4.526151 | -0.228398 |

**[Int-III·H]<sup>+</sup>-Py,PyH<sup>+</sup>,ax-a**

|   |           |           |           |
|---|-----------|-----------|-----------|
| C | -1.237121 | 2.895498  | -2.191783 |
| C | -1.028034 | 1.669288  | -1.565877 |
| C | -0.215759 | 1.585418  | -0.429169 |
| C | 0.341427  | 2.754016  | 0.098018  |
| C | 0.097669  | 3.986860  | -0.504679 |
| H | -1.848647 | 2.942854  | -3.088601 |
| H | -1.512854 | 0.784474  | -1.968750 |
| H | 0.968579  | 2.711624  | 0.984833  |
| H | 0.524623  | 4.888812  | -0.075080 |
| P | 0.069872  | -0.009272 | 0.469702  |
| C | -1.903394 | -0.272243 | 0.478648  |
| C | -2.706604 | 0.742687  | 1.027424  |
| C | -2.562394 | -1.383355 | -0.058734 |
| C | -4.078099 | 0.635522  | 1.031189  |
| H | -2.264331 | 1.636261  | 1.457983  |
| C | -3.942354 | -1.456734 | -0.046644 |
| H | -2.019843 | -2.213570 | -0.496101 |
| H | -4.746237 | 1.382010  | 1.442398  |
| H | -4.505875 | -2.288416 | -0.451468 |
| C | 1.979923  | 0.316447  | 0.594904  |
| C | 2.762039  | 0.191126  | 1.744430  |
| C | 2.671517  | 0.616297  | -0.586396 |
| C | 4.143411  | 0.369586  | 1.668117  |
| H | 2.316858  | -0.042686 | 2.704472  |
| C | 4.050639  | 0.773754  | -0.569494 |
| H | 2.148928  | 0.732392  | -1.532908 |
| H | 4.751992  | 0.275889  | 2.565371  |
| H | 4.585484  | 1.006452  | -1.487738 |
| C | -0.679777 | 4.057886  | -1.658950 |
| H | -0.856282 | 5.016301  | -2.139608 |
| O | 0.088701  | -0.158225 | 2.107580  |
| C | 0.383807  | -1.517512 | -0.530804 |
| C | 0.347215  | -1.544528 | -1.927198 |
| C | 0.697491  | -2.685060 | 0.173590  |
| C | 0.615680  | -2.730093 | -2.609533 |
| H | 0.120332  | -0.648484 | -2.496068 |
| C | 0.956674  | -3.869923 | -0.512285 |
| H | 0.746555  | -2.678287 | 1.260038  |
| H | 0.590396  | -2.739366 | -3.695854 |
| H | 1.195650  | -4.771625 | 0.044926  |
| C | -0.824872 | -0.840368 | 2.972786  |
| H | -0.233107 | -1.130717 | 3.844226  |
| H | -1.632376 | -0.174713 | 3.288104  |
| H | -1.240211 | -1.738422 | 2.508618  |
| C | 0.914871  | -3.895529 | -1.905535 |
| H | 1.120327  | -4.818516 | -2.440788 |
| N | 4.797397  | 0.656628  | 0.538574  |
| N | -4.654749 | -0.455960 | 0.492407  |
| H | -5.669902 | -0.526309 | 0.496797  |

**[Int-III·H]<sup>+</sup>-Py,PyH<sup>+</sup>,ax-b**

|   |           |           |           |
|---|-----------|-----------|-----------|
| C | 1.164100  | 3.025138  | -2.160211 |
| C | 1.022728  | 1.771135  | -1.571224 |
| C | 0.265018  | 1.621041  | -0.405013 |
| C | -0.306241 | 2.750502  | 0.188334  |
| C | -0.130014 | 4.011354  | -0.378812 |
| H | 1.735931  | 3.125391  | -3.078552 |
| H | 1.518567  | 0.916726  | -2.022784 |
| H | -0.886050 | 2.657838  | 1.103385  |
| H | -0.563718 | 4.883366  | 0.102729  |
| P | 0.073303  | -0.009841 | 0.446828  |
| C | -1.893800 | 0.296129  | 0.575403  |
| C | -2.580293 | 0.587570  | -0.616563 |
| C | -2.670854 | 0.147428  | 1.731899  |
| C | -3.949015 | 0.720525  | -0.633738 |
| H | -2.048819 | 0.715889  | -1.554778 |
| C | -4.043979 | 0.289657  | 1.681229  |
| H | -2.215058 | -0.079937 | 2.686914  |
| H | -4.526642 | 0.945438  | -1.521782 |
| H | -4.693082 | 0.190275  | 2.542688  |
| C | 1.989851  | -0.289929 | 0.422923  |
| C | 2.837747  | 0.727486  | 0.880940  |
| C | 2.615986  | -1.455099 | -0.020747 |
| C | 4.213965  | 0.545489  | 0.873149  |
| H | 2.438003  | 1.670050  | 1.247902  |
| C | 4.007835  | -1.547798 | 0.001194  |
| H | 2.049929  | -2.306337 | -0.385281 |
| H | 4.872374  | 1.334158  | 1.230394  |
| H | 4.496481  | -2.454025 | -0.350494 |
| C | 0.593045  | 4.148490  | -1.562183 |
| H | 0.719300  | 5.128875  | -2.013417 |
| O | 0.002759  | -0.129522 | 2.084590  |
| C | -0.325192 | -1.515948 | -0.530594 |
| C | -0.230226 | -1.593942 | -1.921939 |
| C | -0.752834 | -2.632252 | 0.196761  |
| C | -0.565708 | -2.777024 | -2.578277 |
| H | 0.100893  | -0.741184 | -2.506129 |
| C | -1.072732 | -3.817487 | -0.462034 |
| H | -0.839955 | -2.583434 | 1.280096  |
| H | -0.495522 | -2.826578 | -3.661484 |
| H | -1.395713 | -4.681564 | 0.112182  |
| C | 0.936417  | -0.754849 | 2.972687  |
| H | 1.769584  | -0.086187 | 3.200909  |
| H | 0.369304  | -0.955721 | 3.884741  |
| H | 1.313808  | -1.696916 | 2.568078  |
| C | -0.982496 | -3.891402 | -1.851416 |
| H | -1.236588 | -4.813836 | -2.366362 |
| N | 4.811073  | -0.573413 | 0.436820  |
| N | -4.641285 | 0.569140  | 0.511939  |
| H | -5.653007 | 0.674136  | 0.489974  |

**[Int-III·H]<sup>+</sup>-PyH<sup>+</sup>,OMe,ax-a**

|   |           |           |           |
|---|-----------|-----------|-----------|
| C | -1.368591 | 3.940951  | -0.642092 |
| C | -0.647976 | 2.761409  | -0.815421 |
| C | -1.107391 | 1.567178  | -0.250636 |
| C | -2.309753 | 1.561211  | 0.459941  |
| C | -3.039240 | 2.739283  | 0.613218  |
| H | -0.996547 | 4.864788  | -1.076269 |
| H | 0.267557  | 2.779565  | -1.400193 |
| H | -2.694964 | 0.646315  | 0.898690  |
| H | -3.977621 | 2.720004  | 1.160487  |
| P | -0.142298 | 0.031411  | -0.523167 |
| C | -1.020598 | -1.599096 | -0.329415 |
| C | -0.989003 | -2.552651 | -1.347806 |
| C | -1.732458 | -1.922508 | 0.827696  |
| C | -1.636061 | -3.770344 | -1.157575 |
| H | -0.483174 | -2.361626 | -2.286497 |
| C | -2.378345 | -3.152374 | 0.907057  |
| H | -1.796704 | -1.247754 | 1.674655  |
| H | -1.599220 | -4.529703 | -1.934627 |
| H | -2.953287 | -3.405624 | 1.794102  |
| C | 0.459112  | -0.082104 | 1.373244  |
| C | 1.203087  | -1.212407 | 1.756551  |
| C | 0.292023  | 0.921460  | 2.334243  |
| C | 1.726107  | -1.320741 | 3.023540  |
| H | 1.387771  | -2.026454 | 1.061380  |
| C | 0.832708  | 0.783035  | 3.598688  |
| H | -0.252862 | 1.833538  | 2.119956  |
| H | 2.303672  | -2.167405 | 3.373267  |
| H | 0.735391  | 1.526311  | 4.380678  |
| C | -2.566303 | 3.932809  | 0.071765  |
| H | -3.131935 | 4.851696  | 0.199131  |
| O | -0.474127 | 0.066948  | -2.246366 |
| C | 1.641483  | 0.146847  | -0.978707 |
| C | 2.429186  | 1.171354  | -0.441727 |
| C | 2.231203  | -0.798044 | -1.823514 |
| C | 3.781104  | 1.261953  | -0.764012 |
| H | 1.999232  | 1.909079  | 0.230307  |
| C | 3.591848  | -0.723530 | -2.117009 |
| H | 1.641003  | -1.597997 | -2.256952 |
| H | 4.375619  | 2.074413  | -0.355405 |
| H | 4.040927  | -1.472294 | -2.763769 |
| C | -1.794195 | 0.175934  | -2.746376 |
| H | -2.083413 | 1.229215  | -2.858617 |
| H | -1.822604 | -0.305295 | -3.730030 |
| H | -2.536169 | -0.317960 | -2.104048 |
| C | 4.368323  | 0.309691  | -1.595653 |
| H | 5.426113  | 0.372779  | -1.835853 |
| N | 1.524953  | -0.323593 | 3.907085  |
| N | -2.330184 | -4.077480 | -0.057056 |
| H | 1.917702  | -0.410726 | 4.841826  |

**[Int-III·H]<sup>+</sup>-PyH<sup>+</sup>,OMe,ax-b**

|   |           |           |           |
|---|-----------|-----------|-----------|
| C | -3.639417 | 0.027374  | -2.064320 |
| C | -2.346560 | 0.427563  | -1.740288 |
| C | -1.523846 | -0.457778 | -1.044476 |
| C | -2.044243 | -1.710742 | -0.717307 |
| C | -3.339956 | -2.024273 | -1.113442 |
| H | -4.300745 | 0.710386  | -2.591944 |
| H | -2.010432 | 1.417241  | -2.028335 |
| H | -1.469017 | -2.444884 | -0.161389 |
| H | -3.754377 | -3.002768 | -0.883569 |
| P | 0.178978  | 0.035696  | -0.509954 |
| C | 0.640000  | 1.804944  | -0.233136 |
| C | 0.451275  | 2.747706  | -1.251044 |
| C | 1.187187  | 2.231018  | 0.984401  |
| C | 0.783494  | 4.085467  | -1.049734 |
| H | 0.050405  | 2.438891  | -2.209728 |
| C | 1.552269  | 3.561414  | 1.172307  |
| H | 1.332140  | 1.536179  | 1.805508  |
| H | 0.613814  | 4.804213  | -1.846492 |
| H | 1.991301  | 3.867428  | 2.117644  |
| C | 1.469971  | -1.241875 | -0.245612 |
| C | 2.566750  | -1.006053 | 0.586875  |
| C | 1.375477  | -2.458158 | -0.929119 |
| C | 3.552487  | -1.979465 | 0.741000  |
| H | 2.668929  | -0.066632 | 1.120947  |
| C | 2.347971  | -3.439751 | -0.751940 |
| H | 0.550840  | -2.644478 | -1.611087 |
| H | 4.407041  | -1.779172 | 1.381364  |
| H | 2.256979  | -4.385655 | -1.278595 |
| O | 0.529269  | 0.112836  | -2.226426 |
| C | -0.528460 | -0.115324 | 1.346683  |
| C | -1.498967 | 0.813397  | 1.762955  |
| C | -0.227588 | -1.156185 | 2.232523  |
| C | -2.103876 | 0.703044  | 2.993290  |
| H | -1.796619 | 1.640210  | 1.124502  |
| C | -0.852900 | -1.238418 | 3.461972  |
| H | 0.494360  | -1.926068 | 1.986095  |
| H | -2.853267 | 1.389839  | 3.366681  |
| H | -0.656529 | -2.018251 | 4.187065  |
| C | 1.844532  | 0.322154  | -2.708673 |
| H | 2.340761  | -0.636457 | -2.908638 |
| H | 1.778007  | 0.887766  | -3.644591 |
| H | 2.467343  | 0.893200  | -2.007013 |
| C | 3.439869  | -3.202033 | 0.081798  |
| H | 4.203953  | -3.963751 | 0.210484  |
| C | 1.342394  | 4.494973  | 0.158807  |
| H | 1.613802  | 5.536077  | 0.310760  |
| N | -4.141305 | -1.177098 | -1.769521 |
| N | -1.761865 | -0.314377 | 3.807112  |
| H | -2.212500 | -0.385100 | 4.716798  |

**[Int-III·H]<sup>+</sup>-PyH<sup>+</sup>,Ph,ax-a**

|   |           |           |           |
|---|-----------|-----------|-----------|
| C | 1.072453  | 3.051448  | -2.171410 |
| C | 0.971669  | 1.795003  | -1.578970 |
| C | 0.246911  | 1.631048  | -0.394355 |
| C | -0.333466 | 2.747936  | 0.213263  |
| C | -0.196636 | 4.011895  | -0.357648 |
| H | 1.618769  | 3.163429  | -3.103852 |
| H | 1.473301  | 0.949332  | -2.040552 |
| H | -0.889199 | 2.642500  | 1.141890  |
| H | -0.635698 | 4.875340  | 0.134403  |
| P | 0.105168  | -0.005567 | 0.453601  |
| C | -1.880386 | 0.261859  | 0.593648  |
| C | -2.648790 | 0.078968  | 1.751287  |
| C | -2.579505 | 0.562240  | -0.588665 |
| C | -4.024589 | 0.195924  | 1.710669  |
| H | -2.183784 | -0.155182 | 2.700179  |
| C | -3.950917 | 0.669714  | -0.596402 |
| H | -2.056971 | 0.719341  | -1.527660 |
| H | -4.666722 | 0.069273  | 2.573771  |
| H | -4.537451 | 0.899895  | -1.477240 |
| C | 2.002712  | -0.289046 | 0.399368  |
| C | 2.607674  | -1.480837 | -0.012399 |
| C | 2.844364  | 0.753352  | 0.820936  |
| C | 3.998138  | -1.625663 | -0.016175 |
| H | 2.007681  | -2.326166 | -0.335596 |
| C | 4.228936  | 0.615711  | 0.826337  |
| H | 2.414617  | 1.695868  | 1.155217  |
| C | 4.813851  | -0.578825 | 0.401691  |
| H | 4.438095  | -2.562980 | -0.347613 |
| H | 4.852594  | 1.441759  | 1.158840  |
| H | 5.895064  | -0.689630 | 0.398112  |
| C | 0.493862  | 4.163035  | -1.558858 |
| H | 0.589048  | 5.145687  | -2.012803 |
| O | 0.027628  | -0.124714 | 2.091709  |
| C | -0.313859 | -1.505258 | -0.541791 |
| C | -0.732613 | -2.637226 | 0.159871  |
| C | -0.252450 | -1.581383 | -1.931733 |
| C | -1.060268 | -3.785126 | -0.553372 |
| H | -0.806622 | -2.640444 | 1.244160  |
| C | -0.618285 | -2.772881 | -2.551210 |
| H | 0.067507  | -0.743109 | -2.541153 |
| H | -1.378154 | -4.680996 | -0.025711 |
| H | -0.587536 | -2.850966 | -3.635217 |
| N | -1.013186 | -3.865969 | -1.888431 |
| C | 0.995645  | -0.672135 | 2.994326  |
| H | 0.445573  | -0.853445 | 3.920905  |
| H | 1.405940  | -1.615139 | 2.626313  |
| H | 1.803866  | 0.038079  | 3.182455  |
| N | -4.633667 | 0.484372  | 0.549564  |
| H | -5.647201 | 0.571427  | 0.535089  |

**[Int-III·H]<sup>+</sup>-PyH<sup>+</sup>,Ph,ax-b**

|   |           |           |           |
|---|-----------|-----------|-----------|
| C | 0.552342  | -2.818791 | -2.553168 |
| C | 0.206673  | -1.632422 | -1.908212 |
| C | 0.311392  | -1.536766 | -0.518704 |
| C | 0.757773  | -2.639343 | 0.218172  |
| C | 1.085742  | -3.828828 | -0.428771 |
| H | 0.475473  | -2.881601 | -3.635227 |
| H | -0.138950 | -0.791426 | -2.500855 |
| H | 0.851905  | -2.575915 | 1.300125  |
| H | 1.422038  | -4.682515 | 0.153279  |
| P | -0.094859 | -0.027912 | 0.452248  |
| C | 1.879269  | 0.281286  | 0.589674  |
| C | 2.572516  | 0.541832  | -0.605481 |
| C | 2.649388  | 0.175611  | 1.755539  |
| C | 3.940211  | 0.686442  | -0.617475 |
| H | 2.048299  | 0.636152  | -1.551974 |
| C | 4.021715  | 0.327827  | 1.710091  |
| H | 2.188696  | -0.025467 | 2.714005  |
| H | 4.522171  | 0.889090  | -1.508042 |
| H | 4.665262  | 0.260717  | 2.578821  |
| C | -1.999402 | -0.258171 | 0.409123  |
| C | -2.629204 | -1.434359 | -0.009596 |
| C | -2.816955 | 0.798257  | 0.842126  |
| C | -4.022326 | -1.549895 | -0.010266 |
| H | -2.044037 | -2.287415 | -0.339726 |
| C | -4.204225 | 0.689607  | 0.850151  |
| H | -2.367687 | 1.728488  | 1.185405  |
| C | -4.814820 | -0.489099 | 0.417637  |
| H | -4.483186 | -2.475205 | -0.347021 |
| H | -4.809713 | 1.525560  | 1.191355  |
| H | -5.898146 | -0.577047 | 0.416270  |
| C | 0.986941  | -3.919857 | -1.816504 |
| H | 1.247997  | -4.845210 | -2.322649 |
| O | -0.016352 | -0.145641 | 2.091262  |
| C | -0.239323 | 1.609568  | -0.426570 |
| C | 0.310343  | 2.745950  | 0.164808  |
| C | -0.941979 | 1.773500  | -1.620089 |
| C | 0.141338  | 3.979760  | -0.457307 |
| H | 0.859290  | 2.693839  | 1.100802  |
| C | -1.019024 | 3.042236  | -2.185204 |
| H | -1.441353 | 0.943810  | -2.109670 |
| H | 0.544336  | 4.879573  | 0.000707  |
| H | -1.537126 | 3.185128  | -3.130161 |
| N | -0.496397 | 4.138179  | -1.621749 |
| C | -0.977419 | -0.725948 | 2.980931  |
| H | -0.427652 | -0.912694 | 3.906613  |
| H | -1.799843 | -0.034572 | 3.177617  |
| H | -1.368379 | -1.670322 | 2.595409  |
| N | 4.625283  | 0.576310  | 0.536974  |
| H | 5.636304  | 0.689033  | 0.519095  |

**[TS-I·H]<sup>+</sup>-Ph,OMe,ax-a** ( $\nu_i = -481.02 \text{ cm}^{-1}$ )

|   |           |           |           |
|---|-----------|-----------|-----------|
| C | 3.588336  | -1.675086 | 1.149831  |
| C | 2.278469  | -1.526965 | 0.704579  |
| C | 1.942271  | -0.470450 | -0.148763 |
| C | 2.941487  | 0.414590  | -0.574161 |
| C | 4.248701  | 0.265384  | -0.116778 |
| H | 3.835324  | -2.499312 | 1.812537  |
| H | 1.536385  | -2.246111 | 1.028490  |
| H | 2.725631  | 1.221707  | -1.265037 |
| H | 5.011514  | 0.963892  | -0.447945 |
| P | 0.261291  | -0.297174 | -0.806378 |
| C | -0.429157 | 1.330412  | -0.828500 |
| C | -1.773135 | 1.457247  | -1.339129 |
| C | 0.301618  | 2.567953  | -0.696030 |
| C | -2.371097 | 2.678804  | -1.388625 |
| H | -2.339422 | 0.590372  | -1.658561 |
| C | -0.359226 | 3.751807  | -0.769088 |
| H | 1.356774  | 2.583134  | -0.461508 |
| H | -3.392953 | 2.818193  | -1.720806 |
| H | 0.134134  | 4.704980  | -0.623137 |
| C | -0.495115 | 0.645562  | 1.149352  |
| C | -1.818885 | 0.526496  | 1.572053  |
| C | 0.470181  | 1.047960  | 2.075329  |
| C | -2.171606 | 0.748735  | 2.901615  |
| H | -2.598997 | 0.257682  | 0.860957  |
| C | 0.126418  | 1.272122  | 3.409349  |
| H | 1.505596  | 1.189079  | 1.775026  |
| H | -3.208003 | 0.641287  | 3.212334  |
| H | 0.893858  | 1.568446  | 4.120307  |
| C | 4.574129  | -0.774649 | 0.749875  |
| H | 5.594191  | -0.889441 | 1.105282  |
| O | 0.486796  | -0.721375 | -2.389381 |
| C | -0.891375 | -1.692834 | -0.494293 |
| C | -1.020164 | -2.309712 | 0.751352  |
| C | -1.671361 | -2.177270 | -1.545211 |
| C | -1.896011 | -3.381551 | 0.881124  |
| H | -0.478356 | -1.970085 | 1.625580  |
| C | -2.541671 | -3.237226 | -1.301460 |
| H | -1.618328 | -1.749320 | -2.538703 |
| H | -1.996636 | -3.881996 | 1.840355  |
| H | -3.169611 | -3.614474 | -2.104256 |
| C | 1.206702  | 0.086099  | -3.321937 |
| H | 2.281289  | -0.104740 | -3.239947 |
| H | 0.862654  | -0.207075 | -4.316046 |
| H | 1.005239  | 1.152747  | -3.174750 |
| N | -1.688139 | 3.802166  | -1.059779 |
| H | -2.145693 | 4.703614  | -1.134238 |
| C | -1.195052 | 1.118113  | 3.827858  |
| H | -1.464566 | 1.296103  | 4.865591  |
| N | -2.656219 | -3.844069 | -0.117487 |



**[TS-I·H]<sup>+</sup>-Py,OMe,ax-a** ( $\nu_i = -491.12 \text{ cm}^{-1}$ )

|   |           |           |           |
|---|-----------|-----------|-----------|
| C | -3.936541 | -1.624936 | -0.499020 |
| C | -2.686744 | -1.183820 | -0.925818 |
| C | -1.614230 | -1.125934 | -0.025563 |
| C | -1.804416 | -1.535894 | 1.297935  |
| C | -3.048783 | -1.998088 | 1.713053  |
| H | -4.763542 | -1.652822 | -1.202499 |
| H | -2.554155 | -0.884972 | -1.961373 |
| H | -1.000606 | -1.486247 | 2.021124  |
| H | -3.182708 | -2.319292 | 2.741815  |
| P | -0.028797 | -0.548154 | -0.695486 |
| C | 1.514129  | -1.254029 | -0.036671 |
| C | 2.523243  | -1.524282 | -0.971540 |
| C | 1.731749  | -1.555791 | 1.312745  |
| C | 3.734199  | -2.073619 | -0.558108 |
| H | 2.370119  | -1.307719 | -2.024064 |
| C | 2.933431  | -2.127617 | 1.716317  |
| H | 0.985781  | -1.332926 | 2.065107  |
| H | 4.512362  | -2.265435 | -1.290980 |
| H | 3.085710  | -2.363799 | 2.765387  |
| C | 0.055611  | 1.141567  | 0.941791  |
| C | 1.262823  | 1.521389  | 1.523037  |
| C | -1.111205 | 1.540906  | 1.589105  |
| C | 1.255918  | 2.218897  | 2.727359  |
| H | 2.217942  | 1.288727  | 1.056919  |
| C | -1.024044 | 2.237994  | 2.791335  |
| H | -2.095371 | 1.325789  | 1.179170  |
| H | 2.193562  | 2.507403  | 3.198061  |
| H | -1.929016 | 2.541182  | 3.313949  |
| C | -4.118235 | -2.036657 | 0.819156  |
| H | -5.091151 | -2.388701 | 1.150425  |
| O | -0.063158 | -1.248846 | -2.187014 |
| C | 0.039050  | 1.150731  | -1.162914 |
| C | -1.150606 | 1.880927  | -1.516877 |
| C | 1.286577  | 1.747352  | -1.564340 |
| C | -1.048821 | 3.173206  | -1.927416 |
| H | -2.134972 | 1.441652  | -1.414324 |
| C | 1.311940  | 3.044453  | -1.972914 |
| H | 2.219137  | 1.199607  | -1.505991 |
| H | -1.912572 | 3.784122  | -2.160444 |
| H | 2.227443  | 3.557931  | -2.241122 |
| C | -0.176364 | -2.664754 | -2.381847 |
| H | -1.209221 | -2.911185 | -2.644180 |
| H | 0.487780  | -2.932730 | -3.206516 |
| H | 0.113928  | -3.227362 | -1.488438 |
| N | 0.135716  | 2.574230  | 3.370106  |
| N | 0.164483  | 3.758209  | -2.102934 |
| H | 0.209859  | 4.713568  | -2.439132 |
| C | 3.938911  | -2.382190 | 0.784444  |
| H | 4.879958  | -2.819653 | 1.105821  |

**[TS-I·H]<sup>+</sup>-Py,Ph,ax-a** ( $\nu_i = -403.65 \text{ cm}^{-1}$ )

|   |          |          |           |
|---|----------|----------|-----------|
| C | 0.873757 | 3.213453 | -2.015172 |
|---|----------|----------|-----------|

|   |           |           |           |
|---|-----------|-----------|-----------|
| C | 0.923629  | 1.919981  | -1.500356 |
| C | 0.353664  | 1.649936  | -0.252810 |
| C | -0.227174 | 2.677068  | 0.495944  |
| C | -0.247701 | 3.972077  | -0.011898 |
| H | 1.302002  | 3.420066  | -2.991689 |
| H | 1.409976  | 1.132279  | -2.070555 |
| H | -0.667470 | 2.468125  | 1.466551  |
| H | -0.692202 | 4.772107  | 0.572936  |
| P | 0.433456  | -0.021745 | 0.426467  |
| C | -1.937864 | 0.050970  | 0.441955  |
| C | -2.643323 | -0.377434 | 1.564239  |
| C | -2.659053 | 0.754722  | -0.520781 |
| C | -3.997304 | -0.069207 | 1.686323  |
| H | -2.162239 | -0.951433 | 2.352930  |
| C | -4.010120 | 1.018730  | -0.317792 |
| H | -2.189365 | 1.106557  | -1.438580 |
| H | -4.555358 | -0.390957 | 2.564076  |
| H | -4.578856 | 1.574951  | -1.060903 |
| C | 2.228681  | -0.383220 | 0.267728  |
| C | 2.682245  | -1.575723 | -0.304517 |
| C | 3.166454  | 0.563712  | 0.705950  |
| C | 4.050112  | -1.821702 | -0.431291 |
| H | 1.980394  | -2.323990 | -0.660968 |
| C | 4.529106  | 0.315941  | 0.583762  |
| H | 2.832321  | 1.501895  | 1.143714  |
| C | 4.973030  | -0.879158 | 0.013761  |
| H | 4.390121  | -2.750617 | -0.880516 |
| H | 5.245739  | 1.055942  | 0.928848  |
| H | 6.037949  | -1.070991 | -0.085861 |
| C | 0.291273  | 4.238333  | -1.271168 |
| H | 0.263031  | 5.248599  | -1.669813 |
| O | 0.192265  | -0.059448 | 2.011015  |
| C | -0.415153 | -1.318267 | -0.438636 |
| C | -0.665460 | -2.556495 | 0.230383  |
| C | -0.669292 | -1.267666 | -1.842001 |
| C | -1.329815 | -3.548895 | -0.426123 |
| H | -0.370222 | -2.707470 | 1.262521  |
| C | -1.338804 | -2.297766 | -2.435767 |
| H | -0.375424 | -0.416478 | -2.443837 |
| H | -1.581907 | -4.496870 | 0.033205  |
| H | -1.596343 | -2.305532 | -3.487794 |
| N | -1.689075 | -3.396419 | -1.725125 |
| C | 1.097676  | -0.637761 | 2.975596  |
| H | 0.496893  | -0.772826 | 3.875790  |
| H | 1.478207  | -1.602682 | 2.635004  |
| H | 1.922622  | 0.048655  | 3.175801  |
| N | -4.687293 | 0.620770  | 0.768917  |
| H | -2.166638 | -4.157800 | -2.196514 |

**[Int-IV·H]<sup>+</sup>-Ph,OMe,ax-a**

|   |           |           |           |
|---|-----------|-----------|-----------|
| C | 1.998384  | -3.602744 | -0.191212 |
| C | 1.123224  | -2.583881 | -0.558756 |
| C | 1.499088  | -1.264216 | -0.306501 |
| C | 2.744465  | -1.025786 | 0.283263  |
| C | 3.541913  | -2.117949 | 0.607617  |
| H | 1.727428  | -4.639332 | -0.371950 |
| H | 0.181335  | -2.838613 | -1.031536 |
| H | 3.104022  | -0.024503 | 0.491715  |
| H | 4.512789  | -1.960894 | 1.069397  |
| P | 0.414948  | 0.119420  | -0.755584 |
| C | 0.068851  | 1.370304  | 0.640963  |
| C | -0.662685 | 2.479592  | -0.082221 |
| C | 1.357876  | 1.917715  | 1.214446  |
| C | -0.058484 | 3.631694  | -0.425440 |
| H | -1.682034 | 2.316185  | -0.412344 |
| C | 1.868770  | 3.102670  | 0.838673  |
| H | 1.882886  | 1.339413  | 1.965537  |
| H | -0.573767 | 4.401136  | -0.989792 |
| H | 2.796412  | 3.483524  | 1.251481  |
| C | -0.760140 | 0.629434  | 1.696915  |
| C | -2.109163 | 0.927674  | 1.908536  |
| C | -0.174406 | -0.388360 | 2.462101  |
| C | -2.858899 | 0.214145  | 2.842601  |
| H | -2.594293 | 1.720683  | 1.350067  |
| C | -0.923376 | -1.104240 | 3.392411  |
| H | 0.875177  | -0.639111 | 2.340831  |
| H | -3.906770 | 0.462606  | 2.987794  |
| H | -0.447718 | -1.892302 | 3.969779  |
| O | 1.065185  | 0.914483  | -1.973788 |
| C | -1.146038 | -0.473263 | -1.417738 |
| C | -1.973804 | -1.296517 | -0.640709 |
| C | -1.557347 | -0.057599 | -2.689349 |
| C | -3.204944 | -1.703229 | -1.143245 |
| H | -1.663271 | -1.631436 | 0.344402  |
| C | -2.794221 | -0.467773 | -3.180026 |
| H | -0.920919 | 0.581247  | -3.292391 |
| H | -3.842150 | -2.345011 | -0.542241 |
| H | -3.113102 | -0.144352 | -4.166462 |
| C | 2.475381  | 1.148554  | -2.185403 |
| H | 2.976663  | 0.203119  | -2.405076 |
| H | 2.524359  | 1.808658  | -3.050831 |
| H | 2.920651  | 1.634642  | -1.315925 |
| C | -3.616727 | -1.287462 | -2.409343 |
| H | -4.580733 | -1.605445 | -2.796315 |
| N | 1.237011  | 3.922508  | -0.068946 |
| H | 1.598094  | 4.852116  | -0.230162 |
| N | 3.184269  | -3.387148 | 0.385074  |
| C | -2.272807 | -0.810126 | 3.582198  |
| H | -2.859178 | -1.368842 | 4.306488  |

**[Int-IV·H]<sup>+</sup>-Ph,OMe,ax-b**

|   |           |           |           |
|---|-----------|-----------|-----------|
| C | 2.821010  | -2.945920 | -0.251773 |
| C | 1.669960  | -2.208110 | -0.514766 |
| C | 1.746939  | -0.817913 | -0.443591 |
| C | 2.977816  | -0.228777 | -0.137627 |
| C | 4.064763  | -1.061001 | 0.107897  |
| H | 2.789596  | -4.031005 | -0.298224 |
| H | 0.754441  | -2.728442 | -0.771779 |
| H | 3.106073  | 0.847767  | -0.096352 |
| H | 5.032317  | -0.631084 | 0.351944  |
| P | 0.330850  | 0.275462  | -0.722654 |
| C | -0.201733 | 1.300329  | 0.788028  |
| C | -1.235270 | 2.250594  | 0.227681  |
| C | 0.976253  | 2.086556  | 1.314341  |
| C | -0.970407 | 3.550951  | 0.004286  |
| H | -2.201620 | 1.864073  | -0.074811 |
| C | 1.142703  | 3.396276  | 1.058017  |
| H | 1.716833  | 1.577423  | 1.920049  |
| H | -1.705171 | 4.215643  | -0.436497 |
| H | 1.995612  | 3.949223  | 1.435955  |
| C | -0.739202 | 0.290409  | 1.809882  |
| C | -2.100197 | 0.218540  | 2.119947  |
| C | 0.136079  | -0.608048 | 2.435147  |
| C | -2.577331 | -0.737935 | 3.015123  |
| H | -2.806635 | 0.908183  | 1.671386  |
| C | -0.340168 | -1.566225 | 3.326396  |
| H | 1.202981  | -0.573579 | 2.234774  |
| H | -3.639899 | -0.775989 | 3.239394  |
| H | 0.357671  | -2.254722 | 3.795014  |
| O | 0.803827  | 1.392767  | -1.756140 |
| C | -1.088990 | -0.592080 | -1.400496 |
| C | -1.675882 | -1.665696 | -0.713865 |
| C | -1.673483 | -0.106006 | -2.576958 |
| C | -2.826069 | -2.260107 | -1.222094 |
| H | -1.249215 | -2.039911 | 0.212157  |
| C | -2.825121 | -0.708355 | -3.075504 |
| H | -1.242246 | 0.740455  | -3.102396 |
| H | -3.276639 | -3.093157 | -0.690935 |
| H | -3.274557 | -0.331449 | -3.989319 |
| C | 1.540185  | 1.074085  | -2.962625 |
| H | 1.222012  | 0.115734  | -3.380212 |
| H | 1.318543  | 1.879463  | -3.662585 |
| H | 2.607205  | 1.053265  | -2.732910 |
| C | -3.399077 | -1.784653 | -2.401400 |
| H | -4.298160 | -2.252017 | -2.792920 |
| N | 0.230545  | 4.127805  | 0.335077  |
| H | 0.347220  | 5.127293  | 0.247401  |
| N | 3.998172  | -2.395756 | 0.061070  |
| C | -1.701957 | -1.639791 | 3.615311  |
| H | -2.075681 | -2.388311 | 4.308616  |

**[Int-IV·H]<sup>+</sup>-Py,OMe,ax-a**

|   |           |           |           |
|---|-----------|-----------|-----------|
| C | 2.696558  | -3.118611 | -0.333102 |
| C | 1.634076  | -2.274990 | -0.645441 |
| C | 1.724495  | -0.906070 | -0.361985 |
| C | 2.895107  | -0.387656 | 0.214394  |
| C | 3.951328  | -1.238208 | 0.519269  |
| H | 2.618998  | -4.179491 | -0.551508 |
| H | 0.745739  | -2.691062 | -1.109093 |
| H | 2.992102  | 0.672159  | 0.424040  |
| H | 4.853926  | -0.831995 | 0.965778  |
| P | 0.356562  | 0.193734  | -0.765922 |
| C | -0.235355 | 1.344611  | 0.630086  |
| C | -1.266729 | 2.217929  | -0.051456 |
| C | 0.903947  | 2.212104  | 1.122165  |
| C | -0.991922 | 3.474721  | -0.443402 |
| H | -2.231035 | 1.796724  | -0.311368 |
| C | 1.079908  | 3.475063  | 0.697395  |
| H | 1.596687  | 1.801884  | 1.847320  |
| H | -1.716975 | 4.077491  | -0.979151 |
| H | 1.906275  | 4.085598  | 1.044490  |
| C | -0.793438 | 0.457819  | 1.746236  |
| C | -2.152662 | 0.421558  | 2.055971  |
| C | 0.049581  | -0.368412 | 2.496285  |
| C | -2.601245 | -0.435143 | 3.056963  |
| H | -2.875850 | 1.042367  | 1.540654  |
| C | -0.494511 | -1.191102 | 3.475130  |
| H | 1.121971  | -0.390908 | 2.333853  |
| H | -3.660366 | -0.473651 | 3.299551  |
| H | 0.153596  | -1.841855 | 4.056786  |
| C | 3.851189  | -2.603631 | 0.252018  |
| H | 4.677761  | -3.265194 | 0.495195  |
| O | 0.758797  | 1.151221  | -1.977351 |
| C | -1.061178 | -0.723994 | -1.382262 |
| C | -1.671095 | -1.699708 | -0.580124 |
| C | -1.589853 | -0.414832 | -2.640383 |
| C | -2.802801 | -2.361842 | -1.043465 |
| H | -1.264629 | -1.957728 | 0.393798  |
| C | -2.724792 | -1.082951 | -3.093231 |
| H | -1.122135 | 0.341195  | -3.262339 |
| H | -3.270264 | -3.120852 | -0.423292 |
| H | -3.134064 | -0.842641 | -4.070031 |
| C | 2.096473  | 1.603848  | -2.281199 |
| H | 2.722883  | 0.752675  | -2.557212 |
| H | 1.981046  | 2.276124  | -3.130876 |
| H | 2.521575  | 2.141039  | -1.431721 |
| C | -3.330994 | -2.052787 | -2.296969 |
| H | -4.216181 | -2.571635 | -2.654019 |
| N | -1.801191 | -1.242651 | 3.760691  |
| N | 0.210491  | 4.086405  | -0.177290 |
| H | 0.318508  | 5.071408  | -0.374379 |

**[Int-IV·H]<sup>+</sup>-Py,OMe,ax-b**

|   |           |           |           |
|---|-----------|-----------|-----------|
| C | -4.111513 | -0.881723 | 0.155697  |
| C | -2.977325 | -0.135772 | -0.144419 |
| C | -1.766888 | -0.790081 | -0.424254 |
| C | -1.709824 | -2.188449 | -0.426979 |
| C | -2.851047 | -2.925461 | -0.123864 |
| H | -5.046685 | -0.373482 | 0.371023  |
| H | -3.040303 | 0.947952  | -0.172161 |
| H | -0.790941 | -2.711385 | -0.668988 |
| H | -2.803455 | -4.010307 | -0.125895 |
| P | -0.324561 | 0.230069  | -0.754255 |
| C | 1.084296  | -0.722100 | -1.341800 |
| C | 1.698433  | -0.339710 | -2.540912 |
| C | 1.631355  | -1.759937 | -0.571329 |
| C | 2.840888  | -1.006422 | -2.975688 |
| H | 1.297391  | 0.477524  | -3.132496 |
| C | 2.772947  | -2.418465 | -1.015199 |
| H | 1.179386  | -2.056813 | 0.370973  |
| H | 3.313461  | -0.708924 | -3.907072 |
| H | 3.192718  | -3.222430 | -0.418044 |
| C | 0.727185  | 0.382862  | 1.783717  |
| C | 2.072641  | 0.294003  | 2.138610  |
| C | -0.165351 | -0.455674 | 2.459635  |
| C | 2.461139  | -0.622454 | 3.111332  |
| H | 2.829651  | 0.918527  | 1.678948  |
| C | 0.321180  | -1.339965 | 3.415129  |
| H | -1.231505 | -0.442781 | 2.256961  |
| H | 3.509092  | -0.702420 | 3.389661  |
| H | -0.364326 | -2.001179 | 3.939254  |
| C | -4.047025 | -2.275069 | 0.174486  |
| H | -4.934476 | -2.855002 | 0.411676  |
| O | -0.717107 | 1.312102  | -1.859230 |
| C | 0.234708  | 1.334968  | 0.689541  |
| C | -0.919035 | 2.188318  | 1.164585  |
| C | 1.308538  | 2.217689  | 0.094946  |
| C | -1.039898 | 3.484828  | 0.829532  |
| H | -1.678143 | 1.738637  | 1.794065  |
| C | 1.088347  | 3.510215  | -0.205998 |
| H | 2.265558  | 1.781978  | -0.168664 |
| H | -1.877304 | 4.086121  | 1.166068  |
| H | 1.849341  | 4.125315  | -0.673441 |
| C | -1.487880 | 0.969551  | -3.036367 |
| H | -2.550525 | 0.980990  | -2.786060 |
| H | -1.262451 | 1.745469  | -3.767641 |
| H | -1.199500 | -0.009280 | -3.426832 |
| N | 1.614469  | -1.440784 | 3.744566  |
| N | -0.099051 | 4.141906  | 0.072475  |
| C | 3.376371  | -2.044599 | -2.215909 |
| H | 4.268849  | -2.561577 | -2.557023 |
| H | -0.181943 | 5.138049  | -0.072893 |

**[Int-IV·H]<sup>+</sup>-Py,Ph,ax-a**

|   |           |           |           |
|---|-----------|-----------|-----------|
| C | -1.513768 | 3.022570  | -1.742693 |
| C | -0.569117 | 2.115268  | -1.273462 |
| C | -0.696207 | 1.591472  | 0.019229  |
| C | -1.763645 | 1.976633  | 0.838443  |
| C | -2.702523 | 2.884725  | 0.358977  |
| H | -1.414731 | 3.430964  | -2.743992 |
| H | 0.259162  | 1.821013  | -1.912273 |
| H | -1.868884 | 1.567022  | 1.837989  |
| H | -3.532346 | 3.183034  | 0.992798  |
| P | 0.407136  | 0.282432  | 0.556744  |
| C | -1.698934 | -1.296754 | -0.080088 |
| C | -2.316706 | -1.516955 | 1.153773  |
| C | -2.527241 | -0.972882 | -1.155145 |
| C | -3.697882 | -1.392888 | 1.256070  |
| H | -1.749061 | -1.768921 | 2.042906  |
| C | -3.899161 | -0.870385 | -0.950644 |
| H | -2.134533 | -0.791366 | -2.148975 |
| H | -4.186122 | -1.558168 | 2.213391  |
| H | -4.550732 | -0.611355 | -1.781594 |
| C | 2.114002  | 0.698235  | 0.179466  |
| C | 3.090545  | -0.293399 | 0.011574  |
| C | 2.476345  | 2.052676  | 0.143151  |
| C | 4.413400  | 0.072749  | -0.211261 |
| H | 2.833882  | -1.345478 | 0.061467  |
| C | 3.802951  | 2.408150  | -0.079295 |
| H | 1.732821  | 2.830987  | 0.286830  |
| C | 4.769321  | 1.420283  | -0.260790 |
| H | 5.166815  | -0.697695 | -0.344681 |
| H | 4.078722  | 3.457882  | -0.110878 |
| H | 5.803854  | 1.700793  | -0.437462 |
| C | -2.580990 | 3.403260  | -0.929796 |
| H | -3.319432 | 4.108026  | -1.301526 |
| O | 0.193123  | 0.180671  | 2.138722  |
| C | -0.165455 | -1.351012 | -0.222368 |
| C | 0.418672  | -2.525573 | 0.539097  |
| C | 0.313115  | -1.379385 | -1.659069 |
| C | 1.229127  | -3.431823 | -0.032939 |
| H | 0.152728  | -2.657182 | 1.581372  |
| C | 1.142530  | -2.326539 | -2.129037 |
| H | -0.004475 | -0.596400 | -2.338187 |
| H | 1.614955  | -4.280564 | 0.520872  |
| H | 1.475178  | -2.329579 | -3.161052 |
| N | 1.629270  | -3.345052 | -1.345293 |
| C | 1.254095  | -0.183788 | 3.054023  |
| H | 0.763121  | -0.331257 | 4.015564  |
| H | 1.743757  | -1.106260 | 2.735894  |
| H | 1.976021  | 0.633587  | 3.117448  |
| N | -4.494083 | -1.069363 | 0.230975  |
| H | 2.206109  | -4.067858 | -1.749938 |

**[TS-I·H]<sup>+</sup>-Ph,OMe,ax-a** ( $\nu_i = -255.96 \text{ cm}^{-1}$ )

|   |           |           |           |
|---|-----------|-----------|-----------|
| C | 3.068855  | -2.772227 | 0.665464  |
| C | 1.930295  | -2.203240 | 0.100958  |
| C | 1.894229  | -0.819556 | -0.069923 |
| C | 3.006091  | -0.071388 | 0.334253  |
| C | 4.094183  | -0.740352 | 0.883035  |
| H | 3.123453  | -3.848727 | 0.805622  |
| H | 1.108301  | -2.843301 | -0.201547 |
| H | 3.037949  | 1.008444  | 0.220088  |
| H | 4.971683  | -0.183311 | 1.200924  |
| P | 0.453472  | 0.103605  | -0.684437 |
| C | -0.531337 | 1.713872  | 0.614575  |
| C | -1.400508 | 2.322883  | -0.379964 |
| C | 0.545987  | 2.587543  | 1.056346  |
| C | -1.057127 | 3.483135  | -0.996148 |
| H | -2.297506 | 1.812803  | -0.711154 |
| C | 0.827244  | 3.743543  | 0.403882  |
| H | 1.161668  | 2.308181  | 1.903259  |
| H | -1.659028 | 3.929283  | -1.778915 |
| H | 1.641203  | 4.396923  | 0.695042  |
| C | -1.125434 | 0.771297  | 1.631672  |
| C | -2.507749 | 0.584312  | 1.719251  |
| C | -0.293368 | 0.047440  | 2.498395  |
| C | -3.045570 | -0.318472 | 2.637041  |
| H | -3.183538 | 1.144304  | 1.081206  |
| C | -0.829750 | -0.852567 | 3.412453  |
| H | 0.785914  | 0.165730  | 2.452925  |
| H | -4.122756 | -0.451790 | 2.686135  |
| H | -0.166456 | -1.409224 | 4.068765  |
| O | 0.992018  | 0.998547  | -1.919786 |
| C | -0.786524 | -1.036799 | -1.334178 |
| C | -1.398525 | -1.952700 | -0.464187 |
| C | -1.264666 | -0.895350 | -2.642874 |
| C | -2.449082 | -2.744693 | -0.916932 |
| H | -1.063938 | -2.047202 | 0.566225  |
| C | -2.319748 | -1.689780 | -3.086570 |
| H | -0.822172 | -0.167651 | -3.316715 |
| H | -2.913969 | -3.456261 | -0.240525 |
| H | -2.682595 | -1.580257 | -4.104613 |
| C | 1.885584  | 0.472589  | -2.923175 |
| H | 1.647738  | -0.567362 | -3.163613 |
| H | 1.751414  | 1.098268  | -3.806778 |
| H | 2.915690  | 0.546240  | -2.565299 |
| C | -2.909056 | -2.616342 | -2.227806 |
| H | -3.732685 | -3.233028 | -2.576738 |
| N | 0.060975  | 4.170013  | -0.638127 |
| H | 0.272887  | 5.051557  | -1.089071 |
| N | 4.135919  | -2.067012 | 1.055909  |
| C | -2.210656 | -1.044156 | 3.481583  |
| H | -2.629937 | -1.751040 | 4.192241  |



**[TS-II·H]<sup>+</sup>-Py,OMe,ax-a** ( $\nu_i = -245.55 \text{ cm}^{-1}$ )

|   |           |           |           |
|---|-----------|-----------|-----------|
| C | 3.927798  | -1.229217 | 1.140910  |
| C | 2.614527  | -1.265463 | 0.682371  |
| C | 2.097094  | -0.189423 | -0.053679 |
| C | 2.906563  | 0.919245  | -0.326996 |
| C | 4.218499  | 0.952340  | 0.140668  |
| H | 4.324281  | -2.065434 | 1.709653  |
| H | 1.995140  | -2.133376 | 0.896286  |
| H | 2.523374  | 1.753901  | -0.906592 |
| H | 4.843461  | 1.814560  | -0.074006 |
| P | 0.385498  | -0.337352 | -0.633452 |
| C | -0.168027 | 1.273514  | -1.234490 |
| C | -0.802779 | 1.388581  | -2.477065 |
| C | -0.124389 | 2.378712  | -0.371000 |
| C | -1.357886 | 2.606980  | -2.864504 |
| H | -0.864059 | 0.533467  | -3.144394 |
| C | -0.680567 | 3.591530  | -0.764472 |
| H | 0.342074  | 2.296107  | 0.608197  |
| H | -1.841423 | 2.693242  | -3.833492 |
| H | -0.638068 | 4.444852  | -0.093512 |
| C | -1.376474 | -0.189940 | 1.627143  |
| C | -2.392667 | 0.761393  | 1.705412  |
| C | -0.342661 | -0.099309 | 2.565602  |
| C | -2.320747 | 1.752497  | 2.681711  |
| H | -3.240087 | 0.754685  | 1.029416  |
| C | -0.362164 | 0.925344  | 3.501176  |
| H | 0.488677  | -0.796978 | 2.566067  |
| H | -3.103354 | 2.504586  | 2.744806  |
| H | 0.440615  | 1.010110  | 4.229220  |
| C | 4.728576  | -0.118353 | 0.873889  |
| H | 5.752359  | -0.088419 | 1.236397  |
| O | 0.404308  | -1.345668 | -1.906979 |
| C | -1.371906 | -1.258561 | 0.564198  |
| C | -0.970577 | -2.597712 | 0.958457  |
| C | -2.398502 | -1.233658 | -0.461255 |
| C | -1.344280 | -3.682280 | 0.233672  |
| H | -0.333255 | -2.746263 | 1.822197  |
| C | -2.723394 | -2.358038 | -1.152006 |
| H | -2.865834 | -0.300870 | -0.753548 |
| H | -1.034466 | -4.689864 | 0.483972  |
| H | -3.443956 | -2.358398 | -1.961403 |
| C | 1.429700  | -1.260182 | -2.915373 |
| H | 2.372270  | -1.649359 | -2.520426 |
| H | 1.088477  | -1.881499 | -3.744762 |
| H | 1.563640  | -0.228767 | -3.255125 |
| N | -1.328096 | 1.852212  | 3.569568  |
| N | -2.176668 | -3.561147 | -0.837457 |
| C | -1.295661 | 3.707857  | -2.011845 |
| H | -1.730255 | 4.656044  | -2.316095 |
| H | -2.463660 | -4.389304 | -1.345180 |

**[TS-II·H]<sup>+</sup>-Py,Ph,ax-a** ( $\nu_i = -252.59 \text{ cm}^{-1}$ )

|   |           |          |           |
|---|-----------|----------|-----------|
| C | -1.496168 | 2.880512 | -1.868123 |
|---|-----------|----------|-----------|

|   |           |           |           |
|---|-----------|-----------|-----------|
| C | -0.541913 | 2.044219  | -1.294874 |
| C | -0.724530 | 1.565759  | 0.009817  |
| C | -1.869779 | 1.928024  | 0.730287  |
| C | -2.817100 | 2.767481  | 0.151015  |
| H | -1.347784 | 3.251253  | -2.878342 |
| H | 0.341713  | 1.771529  | -1.865828 |
| H | -2.027281 | 1.552021  | 1.736321  |
| H | -3.702740 | 3.046184  | 0.715006  |
| P | 0.384504  | 0.302232  | 0.659184  |
| C | -1.689032 | -1.440087 | -0.142348 |
| C | -2.217269 | -1.592293 | 1.143444  |
| C | -2.570441 | -1.049592 | -1.151044 |
| C | -3.564121 | -1.332069 | 1.360002  |
| H | -1.597526 | -1.884727 | 1.985354  |
| C | -3.903414 | -0.808429 | -0.830773 |
| H | -2.251412 | -0.925821 | -2.179817 |
| H | -3.982369 | -1.439524 | 2.357621  |
| H | -4.595094 | -0.491350 | -1.607253 |
| C | 2.090748  | 0.819618  | 0.330150  |
| C | 3.079060  | -0.167599 | 0.235762  |
| C | 2.445725  | 2.172043  | 0.231667  |
| C | 4.408685  | 0.192209  | 0.030670  |
| H | 2.816877  | -1.216606 | 0.332036  |
| C | 3.775873  | 2.526179  | 0.025972  |
| H | 1.690226  | 2.948277  | 0.315290  |
| C | 4.755591  | 1.537850  | -0.078802 |
| H | 5.171116  | -0.577929 | -0.043504 |
| H | 4.047668  | 3.574980  | -0.052409 |
| H | 5.792346  | 1.818825  | -0.242499 |
| C | -2.634836 | 3.240454  | -1.148194 |
| H | -3.379535 | 3.890511  | -1.599129 |
| O | 0.131561  | 0.435662  | 2.266273  |
| C | -0.219464 | -1.660183 | -0.409673 |
| C | 0.384706  | -2.821156 | 0.236651  |
| C | 0.291861  | -1.420282 | -1.751960 |
| C | 1.459044  | -3.449050 | -0.297989 |
| H | -0.017782 | -3.193447 | 1.171074  |
| C | 1.386902  | -2.073472 | -2.216320 |
| H | -0.152066 | -0.660166 | -2.383538 |
| H | 1.929567  | -4.304191 | 0.172410  |
| H | 1.814648  | -1.871838 | -3.191322 |
| N | 1.992347  | -3.051101 | -1.489143 |
| C | 0.812178  | -0.481510 | 3.141977  |
| H | 0.439676  | -0.269431 | 4.144694  |
| H | 0.585968  | -1.517424 | 2.875191  |
| H | 1.892889  | -0.309998 | 3.106236  |
| N | -4.409815 | -0.938605 | 0.399303  |
| H | 2.779294  | -3.553708 | -1.880523 |

**[Int-V·H]<sup>+</sup>-Ph,OMe,ax-a**

|   |           |           |           |
|---|-----------|-----------|-----------|
| C | -4.778680 | -1.128326 | -0.152476 |
| C | -3.510362 | -0.757626 | 0.281566  |
| C | -2.770145 | 0.148910  | -0.482378 |
| C | -3.355726 | 0.633892  | -1.653473 |
| C | -4.633525 | 0.203019  | -2.004416 |
| H | -5.370439 | -1.831462 | 0.428578  |
| H | -3.116872 | -1.179206 | 1.201595  |
| H | -2.830859 | 1.336227  | -2.296125 |
| H | -5.103801 | 0.568289  | -2.914109 |
| P | -1.085618 | 0.783427  | -0.051161 |
| C | 2.490978  | 1.125416  | -0.574431 |
| C | 2.521585  | 1.552945  | 0.762934  |
| C | 2.299511  | 2.098332  | -1.569379 |
| C | 2.333275  | 2.881819  | 1.067031  |
| H | 2.656867  | 0.852697  | 1.577727  |
| C | 2.120574  | 3.417051  | -1.219834 |
| H | 2.295758  | 1.837743  | -2.621196 |
| H | 2.324473  | 3.270806  | 2.077262  |
| H | 1.966008  | 4.212855  | -1.937282 |
| C | 2.624941  | -0.305902 | -0.918836 |
| C | 3.393884  | -1.164253 | -0.121397 |
| C | 1.959981  | -0.828621 | -2.037137 |
| C | 3.500666  | -2.514304 | -0.440383 |
| H | 3.930050  | -0.778058 | 0.740731  |
| C | 2.062261  | -2.180794 | -2.348298 |
| H | 1.332555  | -0.188589 | -2.650893 |
| H | 4.105162  | -3.167000 | 0.183005  |
| H | 1.530046  | -2.575437 | -3.209220 |
| O | -1.404673 | 1.963823  | 1.074156  |
| C | -0.433563 | -0.601680 | 0.967360  |
| C | -0.380742 | -1.892065 | 0.422569  |
| C | 0.156695  | -0.368492 | 2.213101  |
| C | 0.235305  | -2.928733 | 1.118016  |
| H | -0.821613 | -2.094046 | -0.551748 |
| C | 0.772634  | -1.407957 | 2.910667  |
| H | 0.142795  | 0.628578  | 2.645852  |
| H | 0.268271  | -3.923880 | 0.682766  |
| H | 1.223181  | -1.212273 | 3.880293  |
| C | -2.394792 | 1.814200  | 2.098457  |
| H | -2.319672 | 0.842702  | 2.597790  |
| H | -2.212487 | 2.609576  | 2.824762  |
| H | -3.397380 | 1.930746  | 1.674177  |
| C | 0.813780  | -2.689349 | 2.365292  |
| H | 1.298142  | -3.498202 | 2.905747  |
| N | 2.134540  | 3.770346  | 0.077781  |
| H | 1.995714  | 4.749184  | 0.319877  |
| N | -5.343205 | -0.664106 | -1.275213 |
| C | 2.833843  | -3.026535 | -1.552499 |
| H | 2.912119  | -4.082590 | -1.795745 |

**[Int-V·H]<sup>+</sup>-Py,OMe,ax-a**

|   |           |           |           |
|---|-----------|-----------|-----------|
| C | -4.197082 | -0.541386 | -2.257752 |
| C | -2.962541 | -0.886103 | -1.706198 |
| C | -2.609474 | -0.461688 | -0.419055 |
| C | -3.520068 | 0.318490  | 0.309410  |
| C | -4.753646 | 0.659792  | -0.237448 |
| H | -4.454953 | -0.874040 | -3.259579 |
| H | -2.267281 | -1.489896 | -2.286337 |
| H | -3.264700 | 0.667710  | 1.306353  |
| H | -5.451055 | 1.263074  | 0.337665  |
| P | -0.968309 | -1.009887 | 0.200863  |
| C | -0.431853 | 0.438071  | 1.202784  |
| C | 0.308377  | 0.228284  | 2.372926  |
| C | -0.593137 | 1.748511  | 0.734174  |
| C | 0.861605  | 1.303313  | 3.067191  |
| H | 0.453486  | -0.781313 | 2.750579  |
| C | -0.033739 | 2.822351  | 1.423185  |
| H | -1.155406 | 1.940007  | -0.176375 |
| H | 1.426213  | 1.122454  | 3.978274  |
| H | -0.165979 | 3.831826  | 1.043165  |
| C | 2.315623  | 0.632506  | -1.073622 |
| C | 2.995128  | 1.653960  | -0.406819 |
| C | 1.374178  | 0.997588  | -2.039666 |
| C | 2.709755  | 2.974640  | -0.735101 |
| H | 3.747525  | 1.440224  | 0.345766  |
| C | 1.159768  | 2.347937  | -2.290244 |
| H | 0.788298  | 0.254433  | -2.571856 |
| H | 3.229633  | 3.783734  | -0.228792 |
| H | 0.424347  | 2.652119  | -3.030500 |
| C | -5.093378 | 0.230921  | -1.522405 |
| H | -6.055562 | 0.502226  | -1.948789 |
| O | -1.314303 | -2.148977 | 1.366711  |
| C | 2.562158  | -0.793766 | -0.755876 |
| C | 2.487511  | -1.774131 | -1.754652 |
| C | 2.848207  | -1.196898 | 0.555792  |
| C | 2.671450  | -3.099199 | -1.427378 |
| H | 2.294927  | -1.514939 | -2.789187 |
| C | 3.021694  | -2.534099 | 0.837269  |
| H | 2.908660  | -0.482445 | 1.368139  |
| H | 2.625072  | -3.908357 | -2.145384 |
| H | 3.227421  | -2.918232 | 1.828364  |
| C | -2.305207 | -1.950235 | 2.378081  |
| H | -3.309893 | -2.013007 | 1.946818  |
| H | -2.172723 | -2.754180 | 3.106172  |
| H | -2.181209 | -0.984263 | 2.879553  |
| N | 1.811569  | 3.331644  | -1.660022 |
| N | 2.923938  | -3.438648 | -0.151905 |
| C | 0.694931  | 2.603413  | 2.592132  |
| H | 1.131729  | 3.441866  | 3.128098  |
| H | 3.050387  | -4.423494 | 0.074337  |

**[Int-V·H]<sup>+</sup>-Py,Ph,ax-a**

|   |           |           |           |
|---|-----------|-----------|-----------|
| C | -1.115654 | -1.319967 | 2.722471  |
| C | -0.187492 | -1.157901 | 1.692924  |
| C | -0.474862 | -1.608898 | 0.401105  |
| C | -1.714482 | -2.219750 | 0.157627  |
| C | -2.633139 | -2.396593 | 1.187705  |
| H | -0.878547 | -0.961107 | 3.720718  |
| H | 0.761827  | -0.675937 | 1.907654  |
| H | -1.968098 | -2.557214 | -0.845284 |
| H | -3.587711 | -2.873933 | 0.983361  |
| P | 0.633681  | -1.385362 | -1.044573 |
| C | -2.036219 | 1.506075  | -0.421328 |
| C | -2.316287 | 0.952794  | -1.673269 |
| C | -2.967797 | 1.312288  | 0.600624  |
| C | -3.499614 | 0.243485  | -1.842731 |
| H | -1.623217 | 1.043332  | -2.503490 |
| C | -4.126016 | 0.593760  | 0.324729  |
| H | -2.818160 | 1.725338  | 1.593026  |
| H | -3.730987 | -0.203156 | -2.806270 |
| H | -4.865932 | 0.438256  | 1.105474  |
| C | 2.189229  | -0.786517 | -0.275974 |
| C | 2.626434  | 0.501363  | -0.598570 |
| C | 2.965073  | -1.575527 | 0.584103  |
| C | 3.802998  | 1.010946  | -0.047824 |
| H | 2.047250  | 1.111165  | -1.289215 |
| C | 4.146149  | -1.073976 | 1.123876  |
| H | 2.642544  | -2.583368 | 0.834174  |
| C | 4.563246  | 0.223070  | 0.813618  |
| H | 4.128971  | 2.016118  | -0.302421 |
| H | 4.742384  | -1.692406 | 1.789621  |
| H | 5.484531  | 0.613166  | 1.238151  |
| C | -2.336294 | -1.943003 | 2.473914  |
| H | -3.058145 | -2.069713 | 3.276413  |
| O | 0.967315  | -3.014421 | -1.275972 |
| C | -0.790123 | 2.270974  | -0.179631 |
| C | -0.227984 | 3.073396  | -1.182654 |
| C | -0.148086 | 2.212510  | 1.064478  |
| C | 0.924386  | 3.783738  | -0.924321 |
| H | -0.690276 | 3.172023  | -2.157907 |
| C | 1.007773  | 2.932044  | 1.274536  |
| H | -0.533183 | 1.598708  | 1.869158  |
| H | 1.406819  | 4.429733  | -1.646884 |
| H | 1.560311  | 2.923277  | 2.205310  |
| N | 1.503183  | 3.693761  | 0.285127  |
| C | 1.690219  | -3.332490 | -2.465577 |
| H | 1.722985  | -4.422235 | -2.533151 |
| H | 1.188385  | -2.928200 | -3.353835 |
| H | 2.715769  | -2.945094 | -2.418649 |
| N | -4.402663 | 0.063981  | -0.871705 |
| H | 2.356350  | 4.221926  | 0.457480  |

*Pathway [Int-V·2H]<sup>2+</sup>*

**[Int-III·2H]<sup>2+</sup>-Ph,OMe,ax-a**

|   |           |           |           |
|---|-----------|-----------|-----------|
| C | -0.463949 | 4.166219  | -0.884291 |
| C | -0.201589 | 2.816933  | -1.107856 |
| C | -0.455996 | 1.868035  | -0.109865 |
| C | -0.997437 | 2.297766  | 1.109274  |
| C | -1.292195 | 3.642078  | 1.317561  |
| H | -0.244278 | 4.890073  | -1.663885 |
| H | 0.199358  | 2.506803  | -2.066128 |
| H | -1.191341 | 1.590699  | 1.909550  |
| H | -1.726920 | 3.954309  | 2.262789  |
| P | -0.099662 | 0.084080  | -0.403556 |
| C | -1.575694 | -1.051405 | -0.343313 |
| C | -1.564133 | -2.258479 | -1.049087 |
| C | -2.727346 | -0.690824 | 0.360256  |
| C | -2.673596 | -3.076626 | -1.015327 |
| H | -0.709848 | -2.571270 | -1.638450 |
| C | -3.821759 | -1.531419 | 0.349224  |
| H | -2.797163 | 0.233792  | 0.920465  |
| H | -2.735559 | -4.028145 | -1.527787 |
| H | -4.749878 | -1.316014 | 0.863707  |
| C | 0.430656  | -0.297096 | 1.405687  |
| C | -0.017378 | -1.390052 | 2.153362  |
| C | 1.443282  | 0.502349  | 1.961993  |
| C | 0.508428  | -1.664474 | 3.419702  |
| H | -0.780317 | -2.060261 | 1.768171  |
| C | 1.969421  | 0.236834  | 3.221406  |
| H | 1.831043  | 1.354505  | 1.405968  |
| C | 1.499739  | -0.851762 | 3.959412  |
| H | 0.137442  | -2.519319 | 3.979350  |
| H | 2.746320  | 0.879092  | 3.628080  |
| H | 1.907340  | -1.063006 | 4.944386  |
| C | -1.017042 | 4.581352  | 0.325122  |
| H | -1.233467 | 5.632607  | 0.494194  |
| O | -0.334558 | 0.201273  | -2.150021 |
| C | 1.607655  | -0.461798 | -0.936629 |
| C | 2.518232  | 0.456084  | -1.469259 |
| C | 2.015999  | -1.786598 | -0.746600 |
| C | 3.792832  | 0.038621  | -1.789948 |
| H | 2.259091  | 1.494897  | -1.633005 |
| C | 3.291521  | -2.163755 | -1.106412 |
| H | 1.358900  | -2.530836 | -0.309621 |
| H | 4.554747  | 0.692733  | -2.194907 |
| H | 3.673335  | -3.171249 | -1.000350 |
| N | 4.136510  | -1.246958 | -1.607674 |
| C | -1.568700 | 0.553059  | -2.756300 |
| H | -1.356069 | 1.192206  | -3.619848 |
| H | -2.094900 | -0.345546 | -3.103431 |
| H | -2.232333 | 1.105186  | -2.077682 |
| N | -3.758815 | -2.690673 | -0.324293 |
| H | 5.080778  | -1.538173 | -1.854631 |
| H | -4.574457 | -3.301310 | -0.318320 |

**[Int-III·2H]<sup>2+</sup>-Ph,OMe,ax-b**

|   |           |           |           |
|---|-----------|-----------|-----------|
| C | 0.650653  | 4.153409  | -0.691192 |
| C | 0.660430  | 2.775267  | -0.891580 |
| C | -0.152937 | 1.943809  | -0.113564 |
| C | -0.996668 | 2.512133  | 0.844600  |
| C | -1.030137 | 3.893674  | 1.018282  |
| H | 1.298975  | 4.786799  | -1.290003 |
| H | 1.300351  | 2.353414  | -1.661016 |
| H | -1.631178 | 1.893032  | 1.469000  |
| H | -1.701080 | 4.323905  | 1.756375  |
| P | -0.097240 | 0.132850  | -0.407815 |
| C | -1.739978 | -0.785969 | -0.340941 |
| C | -2.156178 | -1.587758 | -1.406582 |
| C | -2.570993 | -0.680976 | 0.778834  |
| C | -3.363775 | -2.254263 | -1.333364 |
| H | -1.560671 | -1.694475 | -2.303787 |
| C | -3.785439 | -1.335991 | 0.796576  |
| H | -2.292006 | -0.108832 | 1.654826  |
| H | -3.742621 | -2.898843 | -2.116403 |
| H | -4.485654 | -1.282623 | 1.620695  |
| C | 0.346073  | -0.401335 | 1.388459  |
| C | 0.235751  | -1.759806 | 1.724249  |
| C | 0.937317  | 0.454275  | 2.324539  |
| C | 0.671631  | -2.241941 | 2.955457  |
| H | -0.190496 | -2.468525 | 1.015310  |
| C | 1.375459  | -0.022186 | 3.562111  |
| H | 1.071384  | 1.508597  | 2.102012  |
| H | 0.568216  | -3.298702 | 3.188177  |
| H | 1.823722  | 0.667105  | 4.273087  |
| C | -0.199553 | 4.716058  | 0.259166  |
| H | -0.217244 | 5.792354  | 0.406270  |
| O | -0.290049 | 0.339660  | -2.147228 |
| C | 1.515671  | -0.647364 | -0.928442 |
| C | 2.723908  | -0.029078 | -0.585475 |
| C | 1.552062  | -1.876196 | -1.596409 |
| C | 3.915998  | -0.630312 | -0.925810 |
| H | 2.756487  | 0.911219  | -0.046237 |
| C | 2.769360  | -2.449633 | -1.896359 |
| H | 0.651477  | -2.402185 | -1.888193 |
| H | 4.887114  | -0.206206 | -0.703695 |
| H | 2.876375  | -3.399970 | -2.403952 |
| C | -1.343288 | 1.103226  | -2.711771 |
| H | -0.959726 | 2.065309  | -3.072039 |
| H | -1.764060 | 0.548249  | -3.557975 |
| H | -2.153089 | 1.305996  | -1.997744 |
| N | -4.137868 | -2.100489 | -0.249056 |
| H | -5.034880 | -2.583755 | -0.217772 |
| C | 1.240804  | -1.370161 | 3.884283  |
| H | 1.580716  | -1.741143 | 4.847489  |
| N | 3.904403  | -1.814350 | -1.561416 |
| H | 4.794120  | -2.250185 | -1.796477 |

**[Int-III·2H]<sup>2+</sup>-Ph,Ph,ax-a**

|   |           |           |           |
|---|-----------|-----------|-----------|
| C | -1.540576 | 2.772477  | -2.167264 |
| C | -1.184870 | 1.565842  | -1.602266 |
| C | -0.465524 | 1.551621  | -0.404096 |
| C | -0.163573 | 2.766271  | 0.216826  |
| C | -0.575320 | 3.949699  | -0.361724 |
| H | -2.076559 | 2.866553  | -3.103120 |
| H | -1.485415 | 0.651901  | -2.102446 |
| H | 0.388741  | 2.807416  | 1.149583  |
| H | -0.392953 | 4.927295  | 0.066634  |
| P | -0.005151 | -0.039218 | 0.517276  |
| C | -1.867109 | -0.518952 | 0.448514  |
| C | -2.791753 | 0.377610  | 1.009533  |
| C | -2.366308 | -1.680475 | -0.146080 |
| C | -4.159074 | 0.126376  | 0.975826  |
| H | -2.444474 | 1.291620  | 1.489340  |
| C | -3.740448 | -1.937463 | -0.187948 |
| H | -1.700650 | -2.416083 | -0.587507 |
| H | -4.849578 | 0.838337  | 1.420551  |
| H | -4.100061 | -2.848639 | -0.659136 |
| C | 1.838954  | 0.540510  | 0.613121  |
| C | 2.428858  | 0.985753  | -0.579576 |
| C | 2.653644  | 0.465104  | 1.749309  |
| C | 3.772113  | 1.347470  | -0.640874 |
| H | 1.841504  | 1.057151  | -1.492944 |
| C | 4.001412  | 0.828812  | 1.696430  |
| H | 2.240167  | 0.121332  | 2.690396  |
| H | 4.196174  | 1.688563  | -1.581875 |
| H | 4.607982  | 0.765458  | 2.596472  |
| O | 0.063522  | -0.221214 | 2.148009  |
| C | 0.573985  | -1.492489 | -0.497147 |
| C | 0.617833  | -1.549130 | -1.893353 |
| C | 1.049819  | -2.584054 | 0.240265  |
| C | 1.129821  | -2.671723 | -2.509859 |
| H | 0.272876  | -0.735180 | -2.519153 |
| C | 1.543207  | -3.688346 | -0.420449 |
| H | 1.049464  | -2.587754 | 1.325421  |
| H | 1.202495  | -2.786648 | -3.584005 |
| H | 1.923503  | -4.569772 | 0.080248  |
| C | -0.807821 | -0.958436 | 3.015099  |
| H | -0.192650 | -1.221954 | 3.878902  |
| H | -1.645684 | -0.336512 | 3.337468  |
| H | -1.181345 | -1.870111 | 2.544006  |
| N | -1.233790 | 3.916073  | -1.531193 |
| N | 1.568860  | -3.698127 | -1.763509 |
| C | 4.566673  | 1.271423  | 0.503019  |
| H | 5.615488  | 1.553515  | 0.462248  |
| C | -4.640822 | -1.036004 | 0.370039  |
| H | -5.708751 | -1.234668 | 0.336759  |
| H | -1.519354 | 4.797539  | -1.954851 |
| H | 1.943950  | -4.518370 | -2.237344 |



**[Int-III·2H]<sup>2+</sup>-PyH<sup>+</sup>,OMe,ax-a**

|   |           |           |           |
|---|-----------|-----------|-----------|
| C | 1.888390  | 0.993557  | 3.054643  |
| C | 1.299232  | 1.022218  | 1.811269  |
| C | 0.485462  | -0.036744 | 1.373676  |
| C | 0.327075  | -1.119842 | 2.245778  |
| C | 0.932555  | -1.116449 | 3.488122  |
| H | 2.516977  | 1.783213  | 3.447031  |
| H | 1.480658  | 1.891099  | 1.185388  |
| H | -0.265899 | -1.987343 | 1.979960  |
| H | 0.839501  | -1.922363 | 4.205836  |
| P | -0.199753 | 0.013038  | -0.490641 |
| C | -0.884677 | 1.711024  | -0.261779 |
| C | -1.504997 | 2.085864  | 0.937737  |
| C | -0.799005 | 2.648537  | -1.298033 |
| C | -2.043682 | 3.360248  | 1.088406  |
| H | -1.574367 | 1.395541  | 1.772424  |
| C | -1.306766 | 3.935124  | -1.132475 |
| H | -0.338208 | 2.376767  | -2.240942 |
| H | -2.537776 | 3.625680  | 2.018664  |
| H | -1.216059 | 4.654024  | -1.941867 |
| C | -1.334204 | -1.410131 | -0.253596 |
| C | -2.429969 | -1.320853 | 0.609184  |
| C | -1.127193 | -2.586178 | -0.982010 |
| C | -3.304577 | -2.396593 | 0.745715  |
| H | -2.615385 | -0.417156 | 1.181243  |
| C | -1.987058 | -3.670271 | -0.821661 |
| H | -0.303416 | -2.660944 | -1.686590 |
| H | -4.159964 | -2.310273 | 1.409774  |
| H | -1.808841 | -4.583372 | -1.382674 |
| O | -0.443481 | 0.020191  | -2.216756 |
| C | 1.579675  | -0.264831 | -0.969651 |
| C | 2.210736  | -1.481198 | -0.688649 |
| C | 2.316711  | 0.756130  | -1.578758 |
| C | 3.532370  | -1.657601 | -1.039020 |
| H | 1.692838  | -2.296725 | -0.196513 |
| C | 3.641957  | 0.540036  | -1.892157 |
| H | 1.879302  | 1.718101  | -1.817007 |
| H | 4.082653  | -2.574075 | -0.867108 |
| H | 4.276820  | 1.281308  | -2.360940 |
| C | -1.738208 | 0.047557  | -2.798077 |
| H | -2.054826 | -0.966155 | -3.072150 |
| H | -2.492492 | 0.477139  | -2.126314 |
| H | -1.691949 | 0.663573  | -3.702294 |
| C | -3.079090 | -3.576801 | 0.039651  |
| H | -3.756577 | -4.418369 | 0.154451  |
| C | -1.937778 | 4.291841  | 0.056903  |
| H | -2.345566 | 5.291276  | 0.180621  |
| N | 1.684985  | -0.068742 | 3.855819  |
| N | 4.202793  | -0.650309 | -1.622128 |
| H | 5.180087  | -0.794676 | -1.870685 |
| H | 2.120434  | -0.077872 | 4.776219  |

**[Int-III·2H]<sup>2+</sup>-PyH<sup>+</sup>,OMe,ax-b**

|   |           |           |           |
|---|-----------|-----------|-----------|
| C | 2.967781  | 2.989854  | -0.480016 |
| C | 2.250724  | 1.811572  | -0.673151 |
| C | 0.941844  | 1.698400  | -0.192036 |
| C | 0.349879  | 2.786869  | 0.452910  |
| C | 1.064110  | 3.971459  | 0.625520  |
| H | 3.987231  | 3.062161  | -0.848387 |
| H | 2.717799  | 0.989051  | -1.207250 |
| H | -0.667989 | 2.732986  | 0.824709  |
| H | 0.589764  | 4.813825  | 1.121076  |
| P | 0.041423  | 0.134492  | -0.516216 |
| C | -1.839765 | 0.144502  | -0.455780 |
| C | -2.572187 | -0.416981 | -1.505480 |
| C | -2.538270 | 0.696081  | 0.623437  |
| C | -3.951802 | -0.431798 | -1.448706 |
| H | -2.086262 | -0.832420 | -2.378405 |
| C | -3.918368 | 0.694244  | 0.621976  |
| H | -2.036157 | 1.128344  | 1.480486  |
| H | -4.579487 | -0.864644 | -2.217311 |
| H | -4.520088 | 1.121774  | 1.413825  |
| C | 0.031493  | -0.443001 | 1.383706  |
| C | -0.627643 | -1.646225 | 1.691075  |
| C | 0.681845  | 0.213091  | 2.433553  |
| C | -0.635786 | -2.139804 | 2.974854  |
| H | -1.141064 | -2.219840 | 0.923706  |
| C | 0.656495  | -0.311684 | 3.712376  |
| H | 1.228028  | 1.136534  | 2.281057  |
| H | -1.127860 | -3.058056 | 3.270444  |
| H | 1.142136  | 0.151077  | 4.562540  |
| C | 2.376188  | 4.072983  | 0.168431  |
| H | 2.933450  | 4.994684  | 0.310663  |
| O | -0.011039 | 0.444023  | -2.231875 |
| C | 1.021946  | -1.375863 | -0.902419 |
| C | 2.213684  | -1.605726 | -0.204790 |
| C | 0.592249  | -2.308012 | -1.851231 |
| C | 2.972534  | -2.743388 | -0.465892 |
| H | 2.567630  | -0.897368 | 0.539387  |
| C | 1.336655  | -3.463409 | -2.083388 |
| H | -0.319591 | -2.146526 | -2.414528 |
| H | 3.906285  | -2.898436 | 0.067289  |
| H | 0.983678  | -4.188652 | -2.811226 |
| C | -0.513530 | 1.663932  | -2.750748 |
| H | 0.287544  | 2.409504  | -2.831206 |
| H | -0.915329 | 1.462563  | -3.749129 |
| H | -1.319407 | 2.090384  | -2.136826 |
| C | 2.529905  | -3.681182 | -1.397608 |
| H | 3.114041  | -4.576817 | -1.590230 |
| N | 0.002146  | -1.458620 | 3.945885  |
| N | -4.575871 | 0.126802  | -0.400749 |
| H | -0.006713 | -1.833503 | 4.892413  |
| H | -5.594484 | 0.121057  | -0.380383 |

**[Int-III·2H]<sup>2+</sup>-PyH<sup>+</sup>,OMe,ax-c**

|   |           |           |           |
|---|-----------|-----------|-----------|
| C | 2.548854  | -3.228431 | -0.680524 |
| C | 1.456028  | -2.395118 | -0.790458 |
| C | 1.531781  | -1.089265 | -0.293734 |
| C | 2.727380  | -0.654427 | 0.285998  |
| C | 3.799876  | -1.520189 | 0.361367  |
| H | 2.563598  | -4.250746 | -1.036218 |
| H | 0.564996  | -2.775418 | -1.276453 |
| H | 2.848185  | 0.348173  | 0.678873  |
| H | 4.757634  | -1.253317 | 0.790028  |
| P | 0.088247  | 0.055039  | -0.506813 |
| C | 0.394151  | 1.859753  | -0.268292 |
| C | 0.064265  | 2.762677  | -1.286666 |
| C | 0.962984  | 2.352729  | 0.912915  |
| C | 0.270617  | 4.128906  | -1.113696 |
| H | -0.343730 | 2.403853  | -2.224505 |
| C | 1.202564  | 3.715279  | 1.069498  |
| H | 1.229217  | 1.684806  | 1.726519  |
| H | -0.008209 | 4.815999  | -1.907454 |
| H | 1.660642  | 4.076295  | 1.985877  |
| C | -0.454367 | -0.142230 | 1.391631  |
| C | -1.540089 | 0.640718  | 1.822977  |
| C | 0.088496  | -1.039798 | 2.317102  |
| C | -2.031152 | 0.525261  | 3.101762  |
| H | -2.018123 | 1.354500  | 1.158357  |
| C | -0.431102 | -1.132720 | 3.595467  |
| H | 0.917088  | -1.695241 | 2.074815  |
| H | -2.861831 | 1.102342  | 3.488365  |
| H | -0.052130 | -1.809622 | 4.351372  |
| O | 0.443661  | 0.113989  | -2.218251 |
| C | -1.560700 | -0.621497 | -0.980400 |
| C | -1.999059 | -1.838862 | -0.447979 |
| C | -2.400926 | 0.092255  | -1.840547 |
| C | -3.250445 | -2.346049 | -0.789846 |
| H | -1.372822 | -2.405380 | 0.236050  |
| C | -3.666568 | -0.400691 | -2.150926 |
| H | -2.083843 | 1.037150  | -2.267549 |
| H | -3.570019 | -3.301886 | -0.384340 |
| H | -4.317210 | 0.172243  | -2.805720 |
| C | 1.703806  | 0.506226  | -2.737164 |
| H | 2.334009  | -0.373765 | -2.922090 |
| H | 1.531799  | 1.022106  | -3.687493 |
| H | 2.244748  | 1.189968  | -2.070165 |
| C | -4.091349 | -1.623454 | -1.634173 |
| H | -5.074069 | -2.011242 | -1.887817 |
| N | -1.463464 | -0.354981 | 3.949412  |
| H | -1.835167 | -0.432988 | 4.893837  |
| N | 3.676829  | -2.769441 | -0.112876 |
| C | 0.845341  | 4.608573  | 0.061558  |
| H | 1.018439  | 5.673475  | 0.190079  |
| H | 4.477941  | -3.395711 | -0.047138 |

**[Int-III·2H]<sup>2+</sup>-PyH<sup>+</sup>,Ph,ax-a**

|   |           |           |           |
|---|-----------|-----------|-----------|
| C | 1.067258  | 3.045096  | -2.221882 |
| C | 0.976690  | 1.799695  | -1.605273 |
| C | 0.257146  | 1.655074  | -0.415148 |
| C | -0.330012 | 2.779002  | 0.173510  |
| C | -0.203432 | 4.031758  | -0.422797 |
| H | 1.610507  | 3.142817  | -3.157586 |
| H | 1.482872  | 0.949178  | -2.052294 |
| H | -0.881940 | 2.688434  | 1.105791  |
| H | -0.646915 | 4.901588  | 0.053473  |
| P | 0.123700  | 0.041222  | 0.469380  |
| C | -1.862078 | 0.284404  | 0.603507  |
| C | -2.622874 | 0.117531  | 1.767968  |
| C | -2.564187 | 0.567521  | -0.580171 |
| C | -3.998736 | 0.237255  | 1.731834  |
| H | -2.153596 | -0.101626 | 2.718201  |
| C | -3.936112 | 0.677910  | -0.582321 |
| H | -2.045771 | 0.715716  | -1.522967 |
| H | -4.636864 | 0.125728  | 2.599911  |
| H | -4.526231 | 0.899064  | -1.463041 |
| C | 2.006725  | -0.292078 | 0.391250  |
| C | 2.574944  | -1.528729 | 0.066081  |
| C | 2.880392  | 0.756198  | 0.723167  |
| C | 3.960461  | -1.710969 | 0.057977  |
| H | 1.954606  | -2.383968 | -0.183558 |
| C | 4.260623  | 0.581067  | 0.722836  |
| H | 2.481481  | 1.732117  | 0.991246  |
| C | 4.808252  | -0.657465 | 0.384890  |
| H | 4.371207  | -2.682629 | -0.204231 |
| H | 4.909471  | 1.412952  | 0.984373  |
| H | 5.885884  | -0.797684 | 0.378081  |
| C | 0.482630  | 4.163796  | -1.628922 |
| H | 0.569800  | 5.138019  | -2.102023 |
| O | 0.054953  | -0.026045 | 2.104002  |
| C | -0.315247 | -1.489505 | -0.502990 |
| C | -0.746313 | -2.595760 | 0.238646  |
| C | -0.255303 | -1.585105 | -1.895239 |
| C | -1.097127 | -3.756851 | -0.415629 |
| H | -0.811902 | -2.565644 | 1.321693  |
| C | -0.632262 | -2.763242 | -2.507309 |
| H | 0.076705  | -0.762759 | -2.517270 |
| H | -1.431083 | -4.655809 | 0.087101  |
| H | -0.620720 | -2.914896 | -3.579194 |
| N | -1.033337 | -3.802370 | -1.757018 |
| C | 1.066355  | -0.417172 | 3.042013  |
| H | 0.529858  | -0.578577 | 3.979719  |
| H | 1.562871  | -1.341837 | 2.741687  |
| H | 1.802204  | 0.378892  | 3.173102  |
| N | -4.612084 | 0.510577  | 0.569433  |
| H | -5.625586 | 0.602464  | 0.559682  |
| H | -1.300774 | -4.665549 | -2.227501 |

**[Int-III·2H]<sup>2+</sup>-PyH<sup>+</sup>,Ph,ax-b**

|   |           |           |           |
|---|-----------|-----------|-----------|
| C | 0.577375  | -2.910716 | -2.521348 |
| C | 0.215174  | -1.719559 | -1.895243 |
| C | 0.345716  | -1.591701 | -0.510227 |
| C | 0.835273  | -2.666836 | 0.240650  |
| C | 1.179260  | -3.861299 | -0.388191 |
| H | 0.479038  | -2.999048 | -3.599753 |
| H | -0.164829 | -0.903790 | -2.501385 |
| H | 0.951917  | -2.579164 | 1.318496  |
| H | 1.548824  | -4.693124 | 0.204956  |
| P | -0.076482 | -0.088309 | 0.459423  |
| C | 1.873361  | 0.298436  | 0.576056  |
| C | 2.547183  | 0.547759  | -0.631295 |
| C | 2.646463  | 0.277439  | 1.743569  |
| C | 3.907101  | 0.756773  | -0.653776 |
| H | 2.018091  | 0.577147  | -1.579509 |
| C | 4.009948  | 0.492862  | 1.685885  |
| H | 2.197312  | 0.091801  | 2.710377  |
| H | 4.477302  | 0.950271  | -1.553897 |
| H | 4.658216  | 0.488890  | 2.553673  |
| C | -1.977998 | -0.301808 | 0.414654  |
| C | -2.611781 | -1.460662 | -0.044487 |
| C | -2.788466 | 0.743557  | 0.886041  |
| C | -4.005107 | -1.567772 | -0.048610 |
| H | -2.030488 | -2.305304 | -0.401201 |
| C | -4.176242 | 0.641831  | 0.889169  |
| H | -2.336437 | 1.656525  | 1.269512  |
| C | -4.791866 | -0.517601 | 0.414874  |
| H | -4.470913 | -2.479079 | -0.414853 |
| H | -4.777437 | 1.467184  | 1.261814  |
| H | -5.875466 | -0.600313 | 0.410960  |
| C | 1.054015  | -3.984571 | -1.770890 |
| H | 1.326945  | -4.914076 | -2.262755 |
| O | 0.012843  | -0.225940 | 2.090660  |
| C | -0.262631 | 1.570011  | -0.418668 |
| C | 0.195764  | 2.712661  | 0.242677  |
| C | -0.909929 | 1.715180  | -1.648207 |
| C | 0.009329  | 3.954120  | -0.330693 |
| H | 0.692452  | 2.657205  | 1.205607  |
| C | -1.041103 | 2.971273  | -2.203141 |
| H | -1.333221 | 0.870149  | -2.177728 |
| H | 0.322264  | 4.883716  | 0.127728  |
| H | -1.511129 | 3.161566  | -3.159881 |
| N | -0.584799 | 4.041634  | -1.531097 |
| C | -0.939099 | -0.836909 | 2.973109  |
| H | -0.379493 | -1.046602 | 3.887467  |
| H | -1.761143 | -0.152903 | 3.193988  |
| H | -1.328531 | -1.771071 | 2.562582  |
| N | 4.597588  | 0.723268  | 0.501119  |
| H | 5.602996  | 0.879788  | 0.474782  |
| H | -0.701749 | 4.963248  | -1.949197 |

**[Int-III·2H]<sup>2+</sup>-PyH<sup>+</sup>,PyH<sup>+</sup>,ax-a**

|   |           |           |           |
|---|-----------|-----------|-----------|
| C | -1.235041 | 2.941397  | -2.168301 |
| C | -1.050299 | 1.705480  | -1.554484 |
| C | -0.252689 | 1.600986  | -0.409308 |
| C | 0.315836  | 2.754451  | 0.138685  |
| C | 0.097488  | 3.996167  | -0.454751 |
| H | -1.836660 | 3.007760  | -3.070385 |
| H | -1.541578 | 0.830972  | -1.971649 |
| H | 0.927048  | 2.695588  | 1.035795  |
| H | 0.530849  | 4.887816  | -0.010689 |
| P | -0.000160 | -0.005888 | 0.460551  |
| C | -1.951457 | -0.289239 | 0.456228  |
| C | -2.772189 | 0.718772  | 0.989758  |
| C | -2.585871 | -1.418044 | -0.071732 |
| C | -4.142012 | 0.587242  | 0.987753  |
| H | -2.347419 | 1.623777  | 1.413471  |
| C | -3.964694 | -1.514930 | -0.064677 |
| H | -2.026888 | -2.243374 | -0.497026 |
| H | -4.825114 | 1.326662  | 1.386792  |
| H | -4.511765 | -2.360940 | -0.462161 |
| C | 1.942771  | 0.311221  | 0.583751  |
| C | 2.714062  | 0.138168  | 1.739773  |
| C | 2.629148  | 0.628917  | -0.600606 |
| C | 4.087318  | 0.282877  | 1.695464  |
| H | 2.255844  | -0.110315 | 2.688143  |
| C | 3.998337  | 0.763506  | -0.609826 |
| H | 2.101796  | 0.776172  | -1.537903 |
| H | 4.733867  | 0.165225  | 2.556411  |
| H | 4.577960  | 1.007548  | -1.491396 |
| C | -0.666171 | 4.089296  | -1.616674 |
| H | -0.824285 | 5.055162  | -2.088511 |
| O | 0.044290  | -0.132075 | 2.091978  |
| C | 0.362609  | -1.503235 | -0.533554 |
| C | 0.331160  | -1.527392 | -1.930202 |
| C | 0.704832  | -2.661010 | 0.173771  |
| C | 0.636939  | -2.704049 | -2.611552 |
| H | 0.077826  | -0.637498 | -2.497804 |
| C | 1.000396  | -3.836818 | -0.512684 |
| H | 0.744295  | -2.653968 | 1.260665  |
| H | 0.615262  | -2.714210 | -3.697822 |
| H | 1.259898  | -4.732973 | 0.044057  |
| C | -0.863165 | -0.807841 | 2.973073  |
| H | -0.267401 | -1.069110 | 3.850351  |
| H | -1.678923 | -0.144746 | 3.270308  |
| H | -1.263183 | -1.720855 | 2.525691  |
| C | 0.966745  | -3.860564 | -1.906191 |
| H | 1.200267  | -4.776773 | -2.441427 |
| N | 4.686450  | 0.587978  | 0.534068  |
| N | -4.695922 | -0.520181 | 0.459134  |
| H | 5.698446  | 0.694075  | 0.517158  |
| H | -5.710090 | -0.607804 | 0.459145  |

**[TS-I·2H]<sup>2+</sup>-Ph,OMe,ax-a** ( $\nu_i = -523.12 \text{ cm}^{-1}$ )

|   |           |           |           |
|---|-----------|-----------|-----------|
| C | 1.217703  | 4.129264  | -0.454185 |
| C | 0.784513  | 2.889606  | -0.916237 |
| C | 0.298161  | 1.932949  | -0.013996 |
| C | 0.243563  | 2.238939  | 1.351586  |
| C | 0.654259  | 3.487924  | 1.802915  |
| H | 1.606303  | 4.856678  | -1.160621 |
| H | 0.835316  | 2.670575  | -1.977764 |
| H | -0.090643 | 1.504559  | 2.074530  |
| H | 0.600836  | 3.716172  | 2.863217  |
| P | -0.253483 | 0.357099  | -0.727852 |
| C | -1.900522 | -0.253133 | -0.171447 |
| C | -2.623485 | -1.067818 | -1.047627 |
| C | -2.486094 | 0.144460  | 1.031021  |
| C | -3.884581 | -1.499358 | -0.684889 |
| H | -2.232565 | -1.364208 | -2.014215 |
| C | -3.756825 | -0.295814 | 1.341082  |
| H | -1.983201 | 0.783853  | 1.743075  |
| H | -4.500089 | -2.141447 | -1.301787 |
| H | -4.277893 | -0.029852 | 2.251987  |
| C | 0.731983  | -0.853537 | 0.947324  |
| C | 0.015839  | -1.923738 | 1.490256  |
| C | 1.829510  | -0.357285 | 1.653196  |
| C | 0.346987  | -2.443253 | 2.741091  |
| H | -0.806918 | -2.379739 | 0.943477  |
| C | 2.168778  | -0.870926 | 2.902752  |
| H | 2.438501  | 0.439835  | 1.231854  |
| H | -0.229109 | -3.267925 | 3.152967  |
| H | 3.020979  | -0.463727 | 3.440890  |
| C | 1.145936  | 4.433050  | 0.903063  |
| H | 1.476234  | 5.403861  | 1.261520  |
| O | -0.703258 | 0.827739  | -2.239148 |
| C | 0.990094  | -0.824714 | -1.093365 |
| C | 2.332848  | -0.350597 | -1.353554 |
| C | 0.708584  | -2.167595 | -1.548432 |
| C | 3.306587  | -1.237367 | -1.684830 |
| H | 2.592767  | 0.695871  | -1.249012 |
| C | 1.736353  | -2.994806 | -1.870467 |
| H | -0.299319 | -2.559396 | -1.579829 |
| H | 4.336977  | -0.942077 | -1.842574 |
| H | 1.585029  | -4.027127 | -2.162104 |
| C | -1.775260 | 1.746953  | -2.502588 |
| H | -1.446145 | 2.405414  | -3.308781 |
| H | -2.656907 | 1.183911  | -2.821844 |
| H | -2.024738 | 2.349710  | -1.623319 |
| N | -4.403012 | -1.103708 | 0.486438  |
| H | -5.339919 | -1.422299 | 0.733110  |
| C | 1.421830  | -1.912767 | 3.454306  |
| H | 1.686870  | -2.319906 | 4.426371  |
| N | 3.022023  | -2.552070 | -1.879154 |
| H | 3.762277  | -3.183307 | -2.163025 |

**[TS-I-2H]<sup>2+</sup>-Ph,Ph,ax-a** ( $\nu_i = -456.04 \text{ cm}^{-1}$ )

|   |           |           |           |
|---|-----------|-----------|-----------|
| C | -0.674614 | 3.210633  | -1.989003 |
| C | -0.773384 | 1.912441  | -1.526058 |
| C | -0.311702 | 1.618632  | -0.243241 |
| C | 0.192891  | 2.636280  | 0.568142  |
| C | 0.246209  | 3.920914  | 0.069663  |
| H | -0.990816 | 3.522925  | -2.976153 |
| H | -1.211478 | 1.157063  | -2.169364 |
| H | 0.554672  | 2.441942  | 1.571274  |
| H | 0.620004  | 4.769360  | 0.628537  |
| P | -0.425846 | -0.080652 | 0.434563  |
| C | -2.226952 | -0.366924 | 0.242692  |
| C | -3.145584 | 0.610236  | 0.654493  |
| C | -2.698828 | -1.551349 | -0.333247 |
| C | -4.511129 | 0.400222  | 0.499197  |
| H | -2.798765 | 1.538667  | 1.103584  |
| C | -4.069315 | -1.758571 | -0.490369 |
| H | -2.009185 | -2.322047 | -0.664843 |
| H | -5.214936 | 1.161143  | 0.824100  |
| H | -4.425620 | -2.681157 | -0.939608 |
| C | 1.896126  | 0.000282  | 0.389013  |
| C | 2.577271  | 0.668149  | -0.629034 |
| C | 2.592697  | -0.347004 | 1.546844  |
| C | 3.917128  | 1.027037  | -0.480623 |
| H | 2.070309  | 0.918793  | -1.560987 |
| C | 3.935229  | 0.004659  | 1.703329  |
| H | 2.095513  | -0.897605 | 2.342141  |
| H | 4.428932  | 1.556405  | -1.281030 |
| H | 4.462095  | -0.265185 | 2.615795  |
| O | -0.208531 | -0.067814 | 2.015725  |
| C | 0.415251  | -1.394871 | -0.391236 |
| C | 0.628822  | -1.436958 | -1.807295 |
| C | 0.663573  | -2.605467 | 0.340105  |
| C | 1.296999  | -2.495065 | -2.346748 |
| H | 0.306491  | -0.635796 | -2.459936 |
| C | 1.324375  | -3.627203 | -0.267922 |
| H | 0.372324  | -2.705381 | 1.379023  |
| H | 1.528898  | -2.566760 | -3.402512 |
| H | 1.578012  | -4.549896 | 0.239650  |
| C | -1.138410 | -0.605570 | 2.985594  |
| H | -0.548147 | -0.731546 | 3.893515  |
| H | -1.948636 | 0.104957  | 3.157209  |
| H | -1.534440 | -1.569391 | 2.660517  |
| N | -0.173603 | 4.159469  | -1.184501 |
| N | 1.675740  | -3.545175 | -1.577646 |
| C | 4.599804  | 0.698389  | 0.691637  |
| H | 5.645066  | 0.971531  | 0.810886  |
| C | -4.974329 | -0.785636 | -0.074497 |
| H | -6.041516 | -0.947807 | -0.198324 |
| H | -0.118489 | 5.113529  | -1.539428 |
| H | 2.147918  | -4.331041 | -2.011881 |

**[TS-I-2H]<sup>2+</sup>-PyH<sup>+</sup>,OMe,ax-a** ( $\nu_i = -397.29 \text{ cm}^{-1}$ )

|   |           |          |          |
|---|-----------|----------|----------|
| C | -3.719513 | 1.106176 | 1.356007 |
|---|-----------|----------|----------|



|   |           |           |           |
|---|-----------|-----------|-----------|
| C | -2.425300 | 1.206909  | 0.855155  |
| C | -1.989312 | 0.327190  | -0.142970 |
| C | -2.880395 | -0.622047 | -0.663645 |
| C | -4.172241 | -0.718298 | -0.153624 |
| H | -4.045179 | 1.792089  | 2.132354  |
| H | -1.775063 | 1.980744  | 1.244554  |
| H | -2.595122 | -1.283352 | -1.474638 |
| H | -4.851909 | -1.461058 | -0.560530 |
| P | -0.337109 | 0.491520  | -0.854790 |
| C | 0.585513  | -1.027574 | -1.072586 |
| C | 1.943458  | -0.879352 | -1.505822 |
| C | 0.029388  | -2.344311 | -1.183731 |
| C | 2.702387  | -1.983363 | -1.767834 |
| H | 2.404465  | 0.096394  | -1.601308 |
| C | 0.842550  | -3.402178 | -1.457329 |
| H | -1.013160 | -2.543581 | -0.978794 |
| H | 3.744044  | -1.924703 | -2.059045 |
| H | 0.480823  | -4.421782 | -1.504202 |
| C | 0.541030  | -0.820114 | 1.080328  |
| C | 1.848027  | -0.728152 | 1.568397  |
| C | -0.403783 | -1.484500 | 1.871847  |
| C | 2.174412  | -1.243160 | 2.803683  |
| H | 2.634100  | -0.248309 | 0.989545  |
| C | -0.045538 | -1.990585 | 3.104449  |
| H | -1.432330 | -1.618361 | 1.549885  |
| H | 3.162757  | -1.193888 | 3.244444  |
| H | -0.728750 | -2.499627 | 3.773720  |
| C | -4.591017 | 0.137278  | 0.862633  |
| H | -5.599117 | 0.058645  | 1.259428  |
| O | -0.599840 | 1.085802  | -2.348534 |
| C | 0.664812  | 1.871564  | -0.235483 |
| C | 0.761374  | 2.191306  | 1.125399  |
| C | 1.360883  | 2.645473  | -1.174999 |
| C | 1.534924  | 3.271671  | 1.535572  |
| H | 0.245216  | 1.606469  | 1.877740  |
| C | 2.148409  | 3.713631  | -0.754341 |
| H | 1.293924  | 2.417491  | -2.232658 |
| H | 1.593516  | 3.514086  | 2.592500  |
| H | 2.690653  | 4.298547  | -1.491358 |
| C | -1.274928 | 0.356716  | -3.383422 |
| H | -2.356075 | 0.390660  | -3.223100 |
| H | -1.027934 | 0.863502  | -4.317377 |
| H | -0.929024 | -0.680682 | -3.430464 |
| C | 2.234064  | 4.031252  | 0.598862  |
| H | 2.843474  | 4.869770  | 0.923937  |
| N | 1.221527  | -1.852152 | 3.535402  |
| N | 2.162935  | -3.220833 | -1.709269 |
| H | 1.470193  | -2.229174 | 4.447071  |
| H | 2.739406  | -4.025374 | -1.933785 |

**[TS-I·2H]<sup>2+</sup>-PyH<sup>+</sup>,OMe,ax-b** ( $\nu_i = -437.02 \text{ cm}^{-1}$ )

|   |           |           |           |
|---|-----------|-----------|-----------|
| C | 4.058548  | -1.205969 | -0.423885 |
| C | 2.833409  | -0.732126 | -0.883477 |
| C | 1.980421  | -0.036836 | -0.014770 |
| C | 2.381613  | 0.212503  | 1.301114  |
| C | 3.614316  | -0.251433 | 1.748989  |
| H | 4.710239  | -1.750965 | -1.100231 |
| H | 2.555344  | -0.895259 | -1.921066 |
| H | 1.750115  | 0.763974  | 1.986246  |
| H | 3.920862  | -0.051023 | 2.771294  |
| P | 0.420174  | 0.549265  | -0.709913 |
| C | -0.392064 | 1.944273  | 0.117818  |
| C | -0.871321 | 2.963910  | -0.717789 |
| C | -0.548257 | 2.064382  | 1.505031  |
| C | -1.500486 | 4.079688  | -0.173258 |
| H | -0.760043 | 2.891419  | -1.794811 |
| C | -1.162749 | 3.189896  | 2.042918  |
| H | -0.219539 | 1.284004  | 2.179924  |
| H | -1.874717 | 4.857025  | -0.832755 |
| H | -1.272900 | 3.273266  | 3.120028  |
| C | -0.757052 | -0.991625 | 0.846167  |
| C | -2.012699 | -0.716300 | 1.395528  |
| C | -0.020916 | -2.045842 | 1.398529  |
| C | -2.478639 | -1.438434 | 2.473102  |
| H | -2.648713 | 0.066872  | 0.990309  |
| C | -0.515817 | -2.752438 | 2.474705  |
| H | 0.947021  | -2.336524 | 0.999922  |
| H | -3.433311 | -1.266962 | 2.955886  |
| H | 0.005901  | -3.569792 | 2.957519  |
| C | 4.448433  | -0.969131 | 0.892875  |
| H | 5.407057  | -1.334794 | 1.249551  |
| O | 0.883931  | 1.182820  | -2.137006 |
| C | -0.703214 | -0.707577 | -1.276685 |
| C | -0.254507 | -1.988909 | -1.740614 |
| C | -2.032028 | -0.323535 | -1.655332 |
| C | -1.154642 | -2.866179 | -2.265382 |
| H | 0.774534  | -2.305746 | -1.628606 |
| C | -2.878639 | -1.252481 | -2.183097 |
| H | -2.397974 | 0.683155  | -1.492204 |
| H | -0.883491 | -3.864969 | -2.584773 |
| H | -3.905971 | -1.030800 | -2.445197 |
| C | 1.924706  | 2.169350  | -2.252940 |
| H | 2.882223  | 1.667577  | -2.414638 |
| H | 1.673850  | 2.783308  | -3.119368 |
| H | 1.984562  | 2.801601  | -1.361924 |
| N | -1.719029 | -2.426703 | 2.982053  |
| H | -2.073132 | -2.954300 | 3.776702  |
| N | -2.451509 | -2.511011 | -2.442074 |
| H | -3.094278 | -3.176490 | -2.858392 |
| C | -1.642019 | 4.197476  | 1.206997  |
| H | -2.126310 | 5.071922  | 1.632208  |

**[TS-I·2H]<sup>2+</sup>-PyH<sup>+</sup>,Ph,ax-a** ( $\nu_i = -319.63 \text{ cm}^{-1}$ )

|   |          |          |           |
|---|----------|----------|-----------|
| C | 0.667367 | 3.281143 | -2.007585 |
|---|----------|----------|-----------|

|   |           |           |           |
|---|-----------|-----------|-----------|
| C | 0.820175  | 1.988186  | -1.513202 |
| C | 0.310438  | 1.667191  | -0.251019 |
| C | -0.315634 | 2.643906  | 0.529449  |
| C | -0.442748 | 3.938842  | 0.037638  |
| H | 1.051237  | 3.527983  | -2.993017 |
| H | 1.337176  | 1.241370  | -2.110633 |
| H | -0.704136 | 2.396259  | 1.512870  |
| H | -0.921827 | 4.700362  | 0.646003  |
| P | 0.522373  | 0.004936  | 0.409458  |
| C | -1.964688 | -0.005886 | 0.411534  |
| C | -2.655173 | -0.436857 | 1.550457  |
| C | -2.709353 | 0.622501  | -0.594480 |
| C | -4.012673 | -0.220725 | 1.671798  |
| H | -2.144181 | -0.946770 | 2.362354  |
| C | -4.064339 | 0.824201  | -0.446974 |
| H | -2.238734 | 0.968969  | -1.512472 |
| H | -4.604423 | -0.517406 | 2.529869  |
| H | -4.695463 | 1.311278  | -1.180914 |
| C | 2.312619  | -0.294787 | 0.236867  |
| C | 2.805026  | -1.504635 | -0.264958 |
| C | 3.213440  | 0.710677  | 0.618648  |
| C | 4.179871  | -1.707339 | -0.379479 |
| H | 2.130698  | -2.297834 | -0.573269 |
| C | 4.583621  | 0.502921  | 0.507837  |
| H | 2.846355  | 1.658930  | 1.004074  |
| C | 5.068060  | -0.707165 | 0.007977  |
| H | 4.553140  | -2.648311 | -0.773148 |
| H | 5.273737  | 1.286236  | 0.807652  |
| H | 6.138941  | -0.867163 | -0.082022 |
| C | 0.038788  | 4.254992  | -1.233169 |
| H | -0.069481 | 5.265403  | -1.617332 |
| O | 0.231541  | -0.036694 | 1.979830  |
| C | -0.310845 | -1.339477 | -0.422592 |
| C | -0.524484 | -2.555183 | 0.286962  |
| C | -0.552620 | -1.338666 | -1.822899 |
| C | -1.124312 | -3.604729 | -0.348209 |
| H | -0.251606 | -2.654659 | 1.331195  |
| C | -1.157509 | -2.422568 | -2.396556 |
| H | -0.298663 | -0.490630 | -2.446722 |
| H | -1.344504 | -4.545853 | 0.140452  |
| H | -1.401584 | -2.473969 | -3.450487 |
| N | -1.455466 | -3.514197 | -1.657445 |
| C | 1.168156  | -0.511298 | 2.974215  |
| H | 0.573015  | -0.635045 | 3.879202  |
| H | 1.603250  | -1.468019 | 2.678654  |
| H | 1.950152  | 0.232596  | 3.136928  |
| N | -4.674389 | 0.402458  | 0.678529  |
| H | -5.673917 | 0.560122  | 0.780961  |
| H | -1.887219 | -4.313623 | -2.111875 |

**[Int-IV·2H]<sup>2+</sup>-Ph,OMe,ax-a**

|   |           |           |           |
|---|-----------|-----------|-----------|
| C | -2.963293 | -0.471248 | -3.029465 |
| C | -1.778358 | 0.072819  | -2.543018 |
| C | -1.183572 | -0.474418 | -1.398413 |
| C | -1.792345 | -1.547742 | -0.729904 |
| C | -2.974654 | -2.083798 | -1.228061 |
| H | -3.422125 | -0.047336 | -3.917495 |
| H | -1.332661 | 0.922115  | -3.051082 |
| H | -1.359161 | -1.965331 | 0.174553  |
| H | -3.442695 | -2.916564 | -0.711999 |
| P | 0.276926  | 0.322931  | -0.727529 |
| C | 1.680547  | -0.828856 | -0.533804 |
| C | 2.935501  | -0.262020 | -0.280350 |
| C | 1.547977  | -2.217313 | -0.596742 |
| C | 4.017013  | -1.095096 | -0.072195 |
| H | 3.091770  | 0.809976  | -0.251063 |
| C | 2.661987  | -3.005703 | -0.382909 |
| H | 0.606315  | -2.705753 | -0.814951 |
| H | 5.019066  | -0.739907 | 0.132000  |
| H | 2.646113  | -4.087689 | -0.413998 |
| C | -0.706613 | 0.235402  | 1.834556  |
| C | 0.136429  | -0.744323 | 2.377118  |
| C | -2.064795 | 0.201433  | 2.161847  |
| C | -0.369651 | -1.744374 | 3.203119  |
| H | 1.202044  | -0.736420 | 2.166790  |
| C | -2.571518 | -0.797496 | 2.991906  |
| H | -2.746190 | 0.952273  | 1.777402  |
| H | 0.303043  | -2.494235 | 3.610296  |
| H | -3.631381 | -0.805824 | 3.230899  |
| C | -3.558405 | -1.548923 | -2.376204 |
| H | -4.483525 | -1.970241 | -2.758942 |
| O | 0.779630  | 1.455175  | -1.722505 |
| C | -0.140418 | 1.287788  | 0.874144  |
| C | -1.126055 | 2.323692  | 0.395676  |
| C | 1.099504  | 1.963832  | 1.399934  |
| C | -0.784778 | 3.616190  | 0.231099  |
| H | -2.122015 | 2.013270  | 0.101448  |
| C | 1.342330  | 3.273684  | 1.207331  |
| H | 1.823683  | 1.377085  | 1.952873  |
| H | -1.487394 | 4.347214  | -0.153092 |
| H | 2.239939  | 3.751114  | 1.584355  |
| C | 1.434981  | 1.165737  | -2.986019 |
| H | 1.169613  | 1.988578  | -3.649091 |
| H | 2.513692  | 1.141777  | -2.821677 |
| H | 1.089904  | 0.218149  | -3.405200 |
| N | 3.842888  | -2.424012 | -0.123789 |
| H | 4.653352  | -3.023535 | 0.031290  |
| C | -1.729500 | -1.779379 | 3.508109  |
| H | -2.126821 | -2.560168 | 4.150739  |
| N | 0.455827  | 4.097833  | 0.560147  |
| H | 0.639612  | 5.090010  | 0.507882  |

**[Int-IV·2H]<sup>2+</sup>-PyH<sup>+</sup>,OMe,ax-a**

|   |           |           |           |
|---|-----------|-----------|-----------|
| C | 2.969260  | -2.878281 | -0.348603 |
| C | 1.851462  | -2.117049 | -0.678608 |
| C | 1.819315  | -0.752814 | -0.359761 |
| C | 2.923107  | -0.155864 | 0.271373  |
| C | 4.034799  | -0.924954 | 0.593433  |
| H | 2.988134  | -3.935262 | -0.596356 |
| H | 1.019031  | -2.592271 | -1.186672 |
| H | 2.926479  | 0.902774  | 0.508179  |
| H | 4.885615  | -0.457933 | 1.080157  |
| P | 0.378021  | 0.237531  | -0.784419 |
| C | -0.359077 | 1.296236  | 0.628065  |
| C | -1.452315 | 2.082034  | -0.060425 |
| C | 0.680315  | 2.251929  | 1.177327  |
| C | -1.297323 | 3.374848  | -0.398328 |
| H | -2.353798 | 1.570722  | -0.378505 |
| C | 0.734097  | 3.541404  | 0.800184  |
| H | 1.406302  | 1.887673  | 1.894507  |
| H | -2.062225 | 3.916745  | -0.943243 |
| H | 1.492697  | 4.215572  | 1.182033  |
| C | -0.860706 | 0.346738  | 1.716549  |
| C | -2.223233 | 0.213697  | 2.000416  |
| C | 0.047064  | -0.415088 | 2.465365  |
| C | -2.639864 | -0.666066 | 2.977786  |
| H | -2.978182 | 0.787589  | 1.479459  |
| C | -0.411899 | -1.283200 | 3.431261  |
| H | 1.116742  | -0.345461 | 2.312684  |
| H | -3.678425 | -0.817751 | 3.243520  |
| H | 0.235877  | -1.901934 | 4.039035  |
| C | 4.056983  | -2.286183 | 0.289339  |
| H | 4.927555  | -2.883735 | 0.544327  |
| O | 0.727986  | 1.279847  | -1.935105 |
| C | -0.941303 | -0.768697 | -1.472662 |
| C | -1.488354 | -1.821056 | -0.723307 |
| C | -1.465606 | -0.451543 | -2.730425 |
| C | -2.551505 | -2.553159 | -1.239831 |
| H | -1.082595 | -2.086948 | 0.248961  |
| C | -2.532240 | -1.190338 | -3.236466 |
| H | -1.047861 | 0.364401  | -3.310734 |
| H | -2.968866 | -3.372548 | -0.662356 |
| H | -2.938247 | -0.944914 | -4.213241 |
| C | 2.032945  | 1.845877  | -2.195662 |
| H | 2.737825  | 1.052248  | -2.452206 |
| H | 1.885699  | 2.507803  | -3.048352 |
| H | 2.379713  | 2.414649  | -1.331427 |
| C | -3.074638 | -2.237303 | -2.493882 |
| H | -3.906049 | -2.811193 | -2.893196 |
| N | -1.732361 | -1.387677 | 3.653218  |
| N | -0.178703 | 4.096584  | -0.063817 |
| H | -2.057520 | -2.031297 | 4.372783  |
| H | -0.152347 | 5.089965  | -0.246870 |

**[Int-IV·2H]<sup>2+</sup>-PyH<sup>+</sup>,OMe,ax-b**

|   |           |           |           |
|---|-----------|-----------|-----------|
| C | -4.189841 | -0.328237 | 0.311861  |
| C | -2.980956 | 0.219486  | -0.101009 |
| C | -1.877311 | -0.619311 | -0.327240 |
| C | -2.001718 | -2.004058 | -0.162133 |
| C | -3.217390 | -2.541084 | 0.251689  |
| H | -5.042315 | 0.321673  | 0.484663  |
| H | -2.904679 | 1.290853  | -0.258911 |
| H | -1.169194 | -2.669771 | -0.362475 |
| H | -3.313022 | -3.615409 | 0.377084  |
| P | -0.331845 | 0.156403  | -0.811277 |
| C | 0.925812  | -1.026380 | -1.307486 |
| C | 1.542518  | -0.875752 | -2.555519 |
| C | 1.361411  | -2.022186 | -0.420615 |
| C | 2.575221  | -1.734775 | -2.921327 |
| H | 1.229337  | -0.091877 | -3.238190 |
| C | 2.394277  | -2.874068 | -0.796549 |
| H | 0.903602  | -2.140067 | 0.557416  |
| H | 3.050323  | -1.619094 | -3.890828 |
| H | 2.726918  | -3.648028 | -0.111406 |
| C | 0.794180  | 0.519426  | 1.702359  |
| C | 2.128144  | 0.336584  | 2.077838  |
| C | -0.202825 | -0.073875 | 2.490440  |
| C | 2.433307  | -0.432623 | 3.181450  |
| H | 2.945717  | 0.786494  | 1.529782  |
| C | 0.147053  | -0.835236 | 3.583990  |
| H | -1.258034 | 0.044110  | 2.273043  |
| H | 3.444467  | -0.616812 | 3.521949  |
| H | -0.571698 | -1.323987 | 4.229383  |
| C | -4.306249 | -1.706189 | 0.495860  |
| H | -5.252272 | -2.130982 | 0.819243  |
| O | -0.621711 | 1.156254  | -2.015862 |
| C | 0.422445  | 1.350410  | 0.471425  |
| C | -0.578128 | 2.426233  | 0.830024  |
| C | 1.606240  | 1.964682  | -0.240016 |
| C | -0.480930 | 3.682295  | 0.359089  |
| H | -1.406391 | 2.176093  | 1.482976  |
| C | 1.600416  | 3.238281  | -0.674009 |
| H | 2.460905  | 1.342066  | -0.479868 |
| H | -1.210608 | 4.442588  | 0.614042  |
| H | 2.437925  | 3.656351  | -1.221289 |
| C | -1.466339 | 0.783753  | -3.135097 |
| H | -2.507039 | 0.991256  | -2.879488 |
| H | -1.144533 | 1.413988  | -3.963702 |
| H | -1.339897 | -0.270380 | -3.393611 |
| N | 1.444464  | -0.996570 | 3.891705  |
| N | 0.553888  | 4.093047  | -0.442783 |
| C | 2.998909  | -2.732646 | -2.045602 |
| H | 3.805502  | -3.400208 | -2.334779 |
| H | 0.621031  | 5.061173  | -0.722971 |
| H | 1.687391  | -1.559801 | 4.705008  |

**[Int-IV·2H]<sup>2+</sup>-PyH<sup>+</sup>,Ph,ax-a**

|   |           |           |           |
|---|-----------|-----------|-----------|
| C | -1.440672 | 3.038730  | -1.773317 |
| C | -0.515853 | 2.110689  | -1.306250 |
| C | -0.624763 | 1.626231  | 0.003703  |
| C | -1.653560 | 2.071159  | 0.842018  |
| C | -2.572814 | 3.000247  | 0.364137  |
| H | -1.355068 | 3.418527  | -2.786927 |
| H | 0.284524  | 1.771348  | -1.958111 |
| H | -1.740962 | 1.693970  | 1.856100  |
| H | -3.370371 | 3.348817  | 1.013544  |
| P | 0.456307  | 0.303805  | 0.553217  |
| C | -1.684537 | -1.245205 | -0.057766 |
| C | -2.312949 | -1.456741 | 1.176106  |
| C | -2.480053 | -0.909471 | -1.158174 |
| C | -3.679526 | -1.313584 | 1.283421  |
| H | -1.758537 | -1.720515 | 2.068242  |
| C | -3.842942 | -0.773491 | -1.004586 |
| H | -2.056615 | -0.744216 | -2.140809 |
| H | -4.227279 | -1.456628 | 2.206201  |
| H | -4.514159 | -0.507405 | -1.811126 |
| C | 2.164702  | 0.660129  | 0.146446  |
| C | 3.112432  | -0.361198 | -0.010921 |
| C | 2.559035  | 2.004659  | 0.080219  |
| C | 4.441199  | -0.032553 | -0.254537 |
| H | 2.827825  | -1.404441 | 0.061610  |
| C | 3.891673  | 2.321001  | -0.162353 |
| H | 1.836093  | 2.803305  | 0.217696  |
| C | 4.830000  | 1.304574  | -0.333857 |
| H | 5.173915  | -0.823851 | -0.380425 |
| H | 4.194591  | 3.362177  | -0.216767 |
| H | 5.869468  | 1.554804  | -0.526047 |
| C | -2.469574 | 3.479628  | -0.941223 |
| H | -3.191023 | 4.202869  | -1.310705 |
| O | 0.241399  | 0.209348  | 2.132137  |
| C | -0.150923 | -1.334316 | -0.184799 |
| C | 0.402010  | -2.494359 | 0.621679  |
| C | 0.327079  | -1.426756 | -1.619230 |
| C | 1.072601  | -3.510668 | 0.052105  |
| H | 0.233581  | -2.521288 | 1.691964  |
| C | 1.011505  | -2.486114 | -2.083051 |
| H | 0.121712  | -0.610191 | -2.302405 |
| H | 1.431945  | -4.350815 | 0.635914  |
| H | 1.333552  | -2.545001 | -3.116710 |
| N | 1.361729  | -3.549993 | -1.289102 |
| C | 1.318725  | -0.035341 | 3.070450  |
| H | 0.830124  | -0.160897 | 4.036086  |
| H | 1.863146  | -0.942322 | 2.800716  |
| H | 1.988031  | 0.827204  | 3.091376  |
| N | -4.398347 | -0.973656 | 0.201526  |
| H | -5.406843 | -0.868895 | 0.298857  |
| H | 1.896112  | -4.316368 | -1.671897 |

**[TS-II·2H]<sup>2+</sup>-Ph,OMe,ax-a** ( $\nu_i = -241.51 \text{ cm}^{-1}$ )

|   |           |           |           |
|---|-----------|-----------|-----------|
| C | -2.467413 | -1.466929 | -3.116946 |
| C | -1.445806 | -0.645337 | -2.647236 |
| C | -0.857089 | -0.910672 | -1.404324 |
| C | -1.324651 | -1.976281 | -0.619220 |
| C | -2.342250 | -2.793549 | -1.100316 |
| H | -2.918428 | -1.262391 | -4.083570 |
| H | -1.117799 | 0.198026  | -3.247556 |
| H | -0.904962 | -2.168788 | 0.365432  |
| H | -2.696507 | -3.621536 | -0.493304 |
| P | 0.334084  | 0.246691  | -0.709196 |
| C | 1.905761  | -0.594378 | -0.317088 |
| C | 2.990511  | 0.228527  | 0.019479  |
| C | 2.052137  | -1.982929 | -0.251928 |
| C | 4.180418  | -0.350018 | 0.408981  |
| H | 2.922098  | 1.310124  | -0.024736 |
| C | 3.264318  | -2.512508 | 0.141968  |
| H | 1.251638  | -2.663409 | -0.515553 |
| H | 5.063285  | 0.213211  | 0.683822  |
| H | 3.462628  | -3.574777 | 0.209026  |
| C | -1.004912 | 0.421438  | 1.797531  |
| C | -0.011978 | -0.287960 | 2.487830  |
| C | -2.343063 | 0.080083  | 2.008620  |
| C | -0.348208 | -1.325763 | 3.350032  |
| H | 1.037033  | -0.038592 | 2.347739  |
| C | -2.680507 | -0.960538 | 2.874450  |
| H | -3.138305 | 0.622776  | 1.508630  |
| H | 0.436774  | -1.866297 | 3.871679  |
| H | -3.726722 | -1.213532 | 3.022396  |
| C | -2.911907 | -2.541708 | -2.348484 |
| H | -3.710126 | -3.179149 | -2.718160 |
| O | 0.707170  | 1.339630  | -1.824793 |
| C | -0.618547 | 1.514417  | 0.826116  |
| C | -1.666324 | 2.134978  | 0.016284  |
| C | 0.394951  | 2.468669  | 1.276570  |
| C | -1.531015 | 3.397279  | -0.462314 |
| H | -2.537095 | 1.563366  | -0.283298 |
| C | 0.459789  | 3.722780  | 0.766284  |
| H | 1.129862  | 2.170739  | 2.015222  |
| H | -2.271449 | 3.857673  | -1.105852 |
| H | 1.216296  | 4.437279  | 1.068539  |
| C | 1.524548  | 1.037938  | -2.980168 |
| H | 1.199307  | 1.719723  | -3.766533 |
| H | 2.572093  | 1.222517  | -2.730750 |
| H | 1.389997  | 0.002059  | -3.302228 |
| N | 4.276167  | -1.688788 | 0.459255  |
| H | 5.162496  | -2.101630 | 0.747399  |
| C | -1.686901 | -1.671156 | 3.541650  |
| H | -1.951155 | -2.484870 | 4.211288  |
| N | -0.464154 | 4.173606  | -0.128814 |
| H | -0.414831 | 5.128038  | -0.463049 |

**[TS-II·2H]<sup>2+</sup>-PyH<sup>+</sup>,OMe,ax-a** ( $\nu_i = -200.84 \text{ cm}^{-1}$ )

|   |          |          |           |
|---|----------|----------|-----------|
| C | 3.465284 | 1.762214 | -1.174921 |
|---|----------|----------|-----------|



|   |           |           |           |
|---|-----------|-----------|-----------|
| C | 2.332357  | 0.960636  | -1.069413 |
| C | 1.113210  | 1.518203  | -0.659403 |
| C | 1.035849  | 2.886412  | -0.367153 |
| C | 2.174144  | 3.681387  | -0.470401 |
| H | 4.407509  | 1.325628  | -1.493249 |
| H | 2.400689  | -0.095542 | -1.317011 |
| H | 0.093652  | 3.335930  | -0.067986 |
| H | 2.111113  | 4.741836  | -0.243822 |
| P | -0.321189 | 0.415934  | -0.587362 |
| C | -1.577831 | 1.130836  | 0.490160  |
| C | -2.927143 | 0.988476  | 0.141749  |
| C | -1.234552 | 1.675706  | 1.735864  |
| C | -3.921099 | 1.418302  | 1.018085  |
| H | -3.203273 | 0.551176  | -0.813956 |
| C | -2.232751 | 2.098608  | 2.607675  |
| H | -0.191784 | 1.775926  | 2.026037  |
| H | -4.965583 | 1.315073  | 0.738264  |
| H | -1.961322 | 2.529653  | 3.567057  |
| C | 1.074159  | -1.863547 | 0.603080  |
| C | 1.204237  | -1.181660 | 1.821298  |
| C | 2.175284  | -2.583864 | 0.128198  |
| C | 2.401218  | -1.205248 | 2.499396  |
| H | 0.385222  | -0.619358 | 2.254223  |
| C | 3.356495  | -2.579861 | 0.840925  |
| H | 2.136621  | -3.157343 | -0.789270 |
| H | 2.570283  | -0.691777 | 3.437410  |
| H | 4.246307  | -3.110495 | 0.526263  |
| C | 3.387472  | 3.120544  | -0.869091 |
| H | 4.273240  | 3.744961  | -0.945821 |
| O | -0.964258 | 0.331030  | -2.068568 |
| C | -0.225223 | -1.832874 | -0.163251 |
| C | -0.259552 | -2.416381 | -1.493791 |
| C | -1.427945 | -2.087886 | 0.618866  |
| C | -1.416503 | -2.894194 | -2.016300 |
| H | 0.618193  | -2.388478 | -2.128568 |
| C | -2.549913 | -2.577734 | 0.031837  |
| H | -1.459777 | -1.846780 | 1.674976  |
| H | -1.486177 | -3.278135 | -3.026873 |
| H | -3.471599 | -2.737125 | 0.578472  |
| C | -1.191227 | 1.515426  | -2.858708 |
| H | -0.234556 | 1.943095  | -3.170834 |
| H | -1.755748 | 1.186419  | -3.732009 |
| H | -1.770308 | 2.254456  | -2.297121 |
| N | 3.437973  | -1.893519 | 1.990640  |
| N | -2.560479 | -2.932775 | -1.280354 |
| C | -3.575738 | 1.973033  | 2.249053  |
| H | -4.352446 | 2.306807  | 2.931418  |
| H | -3.401377 | -3.327407 | -1.685189 |
| H | 4.319139  | -1.900924 | 2.502032  |

**[TS-II·2H]<sup>2+</sup>-PyH<sup>+</sup>,Ph,ax-a** ( $\nu_i = -239.51 \text{ cm}^{-1}$ )

|   |           |           |           |
|---|-----------|-----------|-----------|
| C | -1.685289 | 2.764134  | -1.835781 |
| C | -0.672209 | 1.993047  | -1.273095 |
| C | -0.790095 | 1.540451  | 0.048519  |
| C | -1.929985 | 1.862391  | 0.796674  |
| C | -2.937316 | 2.635648  | 0.226302  |
| H | -1.586638 | 3.116215  | -2.858545 |
| H | 0.205603  | 1.747478  | -1.864861 |
| H | -2.034762 | 1.508253  | 1.817372  |
| H | -3.817370 | 2.886621  | 0.811683  |
| P | 0.389983  | 0.336965  | 0.682946  |
| C | -1.575640 | -1.470531 | -0.176713 |
| C | -2.132275 | -1.622006 | 1.101812  |
| C | -2.421750 | -1.098079 | -1.227766 |
| C | -3.472595 | -1.378897 | 1.299949  |
| H | -1.533096 | -1.896838 | 1.962508  |
| C | -3.756719 | -0.856482 | -0.980237 |
| H | -2.066055 | -0.988812 | -2.244313 |
| H | -3.962195 | -1.466960 | 2.261250  |
| H | -4.460920 | -0.551720 | -1.743791 |
| C | 2.069434  | 0.903261  | 0.318356  |
| C | 3.095972  | -0.048360 | 0.261653  |
| C | 2.366019  | 2.262043  | 0.143218  |
| C | 4.406722  | 0.354415  | 0.022259  |
| H | 2.879237  | -1.101405 | 0.414001  |
| C | 3.678497  | 2.657726  | -0.097164 |
| H | 1.580956  | 3.011000  | 0.195774  |
| C | 4.696483  | 1.705688  | -0.161409 |
| H | 5.199597  | -0.386698 | -0.020959 |
| H | 3.906142  | 3.711031  | -0.233494 |
| H | 5.719192  | 2.019248  | -0.351722 |
| C | -2.819550 | 3.082245  | -1.089626 |
| H | -3.610309 | 3.681108  | -1.532811 |
| O | 0.142833  | 0.436443  | 2.288844  |
| C | -0.096445 | -1.666242 | -0.397675 |
| C | 0.504629  | -2.811234 | 0.275510  |
| C | 0.452634  | -1.419981 | -1.721505 |
| C | 1.607053  | -3.422320 | -0.222682 |
| H | 0.082048  | -3.189617 | 1.198242  |
| C | 1.573345  | -2.056857 | -2.147189 |
| H | 0.025750  | -0.661270 | -2.366421 |
| H | 2.077337  | -4.265601 | 0.268585  |
| H | 2.031841  | -1.846585 | -3.106125 |
| N | 2.168499  | -3.022322 | -1.398076 |
| C | 0.850498  | -0.467061 | 3.160015  |
| H | 0.513990  | -0.229388 | 4.169468  |
| H | 0.606090  | -1.505579 | 2.922190  |
| H | 1.929954  | -0.303524 | 3.082896  |
| N | -4.239505 | -1.000748 | 0.263363  |
| H | -5.228021 | -0.817913 | 0.427483  |
| H | 2.977767  | -3.511574 | -1.760898 |

**[Int-V·2H]<sup>2+</sup>-Ph,OMe,ax-a**

|   |           |           |           |
|---|-----------|-----------|-----------|
| C | -1.501452 | -2.639170 | 2.204882  |
| C | -0.855029 | -2.509217 | 0.978424  |
| C | -0.047945 | -1.394228 | 0.714408  |
| C | 0.080791  | -0.402434 | 1.693166  |
| C | -0.571236 | -0.531273 | 2.918400  |
| H | -2.117124 | -3.513211 | 2.399551  |
| H | -0.979601 | -3.283457 | 0.224576  |
| H | 0.680671  | 0.485408  | 1.508247  |
| H | -0.462098 | 0.248192  | 3.667773  |
| P | 0.608184  | -1.177424 | -0.988269 |
| C | 2.262927  | -0.383859 | -0.637726 |
| C | 2.741498  | 0.517262  | -1.593937 |
| C | 3.055102  | -0.655296 | 0.483990  |
| C | 3.970309  | 1.123242  | -1.414616 |
| H | 2.164250  | 0.760474  | -2.479980 |
| C | 4.278670  | -0.031877 | 0.623645  |
| H | 2.734964  | -1.344207 | 1.257316  |
| H | 4.403392  | 1.834017  | -2.107025 |
| H | 4.947755  | -0.192278 | 1.459552  |
| C | -1.402806 | 2.020187  | -0.056132 |
| C | -0.220086 | 2.350484  | -0.729382 |
| C | -1.617141 | 2.518193  | 1.235640  |
| C | 0.743040  | 3.142945  | -0.110697 |
| H | -0.033042 | 1.960885  | -1.725994 |
| C | -0.661430 | 3.324869  | 1.844173  |
| H | -2.535505 | 2.281087  | 1.765944  |
| H | 1.666356  | 3.374250  | -0.634777 |
| H | -0.840216 | 3.710573  | 2.843832  |
| C | -1.361874 | -1.649051 | 3.178182  |
| H | -1.869011 | -1.748623 | 4.134035  |
| O | 1.041649  | -2.710362 | -1.432315 |
| C | -2.376526 | 1.098153  | -0.678133 |
| C | -3.047101 | 0.141026  | 0.099445  |
| C | -2.625513 | 1.120658  | -2.059279 |
| C | -3.911574 | -0.747282 | -0.498605 |
| H | -2.872616 | 0.058797  | 1.166121  |
| C | -3.501149 | 0.214911  | -2.614202 |
| H | -2.150075 | 1.848244  | -2.706975 |
| H | -4.446420 | -1.519921 | 0.039064  |
| H | -3.741226 | 0.179305  | -3.669310 |
| C | 1.935490  | -3.540075 | -0.679713 |
| H | 1.806010  | -4.555732 | -1.059179 |
| H | 2.970625  | -3.221275 | -0.839733 |
| H | 1.700427  | -3.518736 | 0.389264  |
| N | 4.689875  | 0.831827  | -0.319845 |
| H | 5.595251  | 1.283719  | -0.201181 |
| C | 0.525422  | 3.630750  | 1.176922  |
| H | 1.276869  | 4.249972  | 1.659102  |
| N | -4.112004 | -0.688195 | -1.826980 |
| H | -4.755002 | -1.352169 | -2.253014 |

**[Int-V·2H]<sup>2+</sup>-PyH<sup>+</sup>,OMe,ax-a**

|   |           |           |           |
|---|-----------|-----------|-----------|
| C | 4.631704  | -0.590448 | 1.972939  |
| C | 3.315695  | -0.872173 | 1.605598  |
| C | 2.768710  | -0.332376 | 0.434432  |
| C | 3.565373  | 0.500766  | -0.364210 |
| C | 4.878374  | 0.783759  | 0.001681  |
| H | 5.042302  | -1.014193 | 2.885399  |
| H | 2.708759  | -1.515377 | 2.239644  |
| H | 3.160378  | 0.934759  | -1.274615 |
| H | 5.486549  | 1.430120  | -0.625480 |
| P | 1.036203  | -0.805505 | 0.041090  |
| C | 0.458761  | 0.659706  | -0.911791 |
| C | -0.206209 | 0.516157  | -2.133478 |
| C | 0.544544  | 1.934915  | -0.335983 |
| C | -0.761021 | 1.623991  | -2.775132 |
| H | -0.294913 | -0.465053 | -2.592937 |
| C | -0.012190 | 3.040238  | -0.973581 |
| H | 1.051706  | 2.070825  | 0.617059  |
| H | -1.268252 | 1.495350  | -3.727809 |
| H | 0.065238  | 4.022400  | -0.514445 |
| C | -2.518293 | 0.378790  | 0.905491  |
| C | -3.180294 | 1.342593  | 0.138562  |
| C | -1.772663 | 0.790542  | 2.016572  |
| C | -3.086094 | 2.672343  | 0.492948  |
| H | -3.780008 | 1.075037  | -0.723448 |
| C | -1.711040 | 2.130429  | 2.333287  |
| H | -1.217977 | 0.085850  | 2.624425  |
| H | -3.569729 | 3.474106  | -0.049905 |
| H | -1.151044 | 2.524453  | 3.171703  |
| C | 5.413276  | 0.238071  | 1.170463  |
| H | 6.437905  | 0.462345  | 1.454939  |
| O | 1.180683  | -1.974725 | -1.135221 |
| C | -2.573093 | -1.059076 | 0.539084  |
| C | -2.524846 | -2.047571 | 1.528909  |
| C | -2.634666 | -1.447354 | -0.803584 |
| C | -2.509459 | -3.375914 | 1.160390  |
| H | -2.505343 | -1.800612 | 2.583834  |
| C | -2.607947 | -2.788240 | -1.124005 |
| H | -2.671396 | -0.722484 | -1.607519 |
| H | -2.468758 | -4.195524 | 1.866590  |
| H | -2.630792 | -3.163589 | -2.138930 |
| C | 2.144802  | -1.894939 | -2.190251 |
| H | 3.147542  | -2.107090 | -1.805049 |
| H | 1.867836  | -2.657281 | -2.922254 |
| H | 2.140420  | -0.911626 | -2.672040 |
| N | -2.366238 | 3.020450  | 1.571004  |
| N | -2.540427 | -3.701283 | -0.142215 |
| C | -0.667230 | 2.888034  | -2.196993 |
| H | -1.102551 | 3.750838  | -2.694003 |
| H | -2.518553 | -4.687670 | -0.397593 |
| H | -2.308354 | 4.007167  | 1.818234  |

**[Int-V·2H]<sup>2+</sup>-PyH<sup>+</sup>,Ph,ax-a**

|   |           |           |           |
|---|-----------|-----------|-----------|
| C | -1.305517 | -1.215327 | 2.674934  |
| C | -0.343384 | -1.120204 | 1.668476  |
| C | -0.622146 | -1.569893 | 0.374348  |
| C | -1.889533 | -2.108484 | 0.104695  |
| C | -2.843718 | -2.218380 | 1.111741  |
| H | -1.072860 | -0.860232 | 3.675489  |
| H | 0.626602  | -0.693049 | 1.904763  |
| H | -2.134164 | -2.446545 | -0.900432 |
| H | -3.817829 | -2.645543 | 0.888570  |
| P | 0.538055  | -1.443058 | -1.043205 |
| C | -1.840403 | 1.634121  | -0.406035 |
| C | -2.145607 | 1.088232  | -1.658450 |
| C | -2.770085 | 1.510577  | 0.631415  |
| C | -3.350839 | 0.445496  | -1.842739 |
| H | -1.450869 | 1.135210  | -2.488261 |
| C | -3.963190 | 0.858511  | 0.398540  |
| H | -2.590222 | 1.927480  | 1.615141  |
| H | -3.652610 | -0.008210 | -2.778052 |
| H | -4.731399 | 0.726791  | 1.149461  |
| C | 2.108785  | -0.922984 | -0.250196 |
| C | 2.655969  | 0.308418  | -0.622707 |
| C | 2.794614  | -1.723937 | 0.673445  |
| C | 3.852637  | 0.752727  | -0.058700 |
| H | 2.147851  | 0.924223  | -1.362531 |
| C | 3.994085  | -1.287371 | 1.228204  |
| H | 2.386405  | -2.689495 | 0.962017  |
| C | 4.521157  | -0.044558 | 0.867459  |
| H | 4.265659  | 1.714758  | -0.350852 |
| H | 4.518983  | -1.913781 | 1.944583  |
| H | 5.456818  | 0.295453  | 1.303444  |
| C | -2.553787 | -1.768630 | 2.401183  |
| H | -3.301138 | -1.846135 | 3.186372  |
| O | 0.774059  | -3.093995 | -1.232284 |
| C | -0.545277 | 2.325107  | -0.180398 |
| C | 0.054724  | 3.071091  | -1.201667 |
| C | 0.096160  | 2.239698  | 1.060169  |
| C | 1.259759  | 3.699364  | -0.965079 |
| H | -0.409060 | 3.190556  | -2.173744 |
| C | 1.304592  | 2.876993  | 1.246561  |
| H | -0.322173 | 1.668748  | 1.879651  |
| H | 1.779783  | 4.296976  | -1.702869 |
| H | 1.864615  | 2.843889  | 2.172150  |
| N | 1.842126  | 3.581885  | 0.238665  |
| C | 1.528922  | -3.482009 | -2.380831 |
| H | 1.493147  | -4.572652 | -2.427963 |
| H | 1.096380  | -3.063661 | -3.298634 |
| H | 2.574144  | -3.160615 | -2.291182 |
| N | -4.215550 | 0.355456  | -0.819722 |
| H | -5.100579 | -0.125038 | -0.972673 |
| H | 2.735690  | 4.045972  | 0.393079  |

## ***Final Products***

### **BiPy**

|   |           |           |           |
|---|-----------|-----------|-----------|
| C | 0.742260  | -0.000031 | 0.000014  |
| C | 1.468254  | -1.131421 | 0.382854  |
| C | 1.468203  | 1.131379  | -0.382860 |
| C | 2.857619  | -1.080506 | 0.367319  |
| H | 0.966866  | -2.038218 | 0.707588  |
| C | 2.857595  | 1.080517  | -0.367358 |
| H | 0.966792  | 2.038224  | -0.707412 |
| H | 3.436609  | -1.950335 | 0.667936  |
| H | 3.436545  | 1.950412  | -0.667872 |
| C | -0.742257 | 0.000004  | 0.000020  |
| C | -1.468226 | 1.131416  | 0.382812  |
| C | -1.468229 | -1.131400 | -0.382850 |
| C | -2.857602 | 1.080492  | 0.367389  |
| H | -0.966836 | 2.038214  | 0.707504  |
| C | -2.857614 | -1.080498 | -0.367389 |
| H | -0.966825 | -2.038243 | -0.707435 |
| H | -3.436570 | 1.950393  | 0.667846  |
| H | -3.436595 | -1.950382 | -0.667873 |
| N | 3.557715  | 0.000030  | -0.000006 |
| N | -3.557715 | -0.000001 | 0.000007  |

### **Phosph-Ph,Ph,OMe**

|   |           |           |           |
|---|-----------|-----------|-----------|
| C | 3.771818  | -0.142717 | 0.391612  |
| C | 2.652682  | 0.636088  | 0.100662  |
| C | 1.457717  | 0.034663  | -0.315628 |
| C | 1.414002  | -1.357887 | -0.459973 |
| C | 2.537438  | -2.134038 | -0.178772 |
| H | 4.688279  | 0.336911  | 0.725373  |
| H | 2.712326  | 1.716003  | 0.207607  |
| H | 0.499141  | -1.847603 | -0.785133 |
| H | 2.486022  | -3.213919 | -0.290383 |
| P | 0.028417  | 1.080765  | -0.803060 |
| C | -1.377118 | 0.034285  | -0.248482 |
| C | -2.314621 | -0.384138 | -1.197072 |
| C | -1.542632 | -0.342133 | 1.091589  |
| C | -3.396037 | -1.182769 | -0.818584 |
| H | -2.202718 | -0.087842 | -2.238193 |
| C | -2.627234 | -1.126366 | 1.472160  |
| H | -0.819665 | -0.022012 | 1.838357  |
| H | -4.116219 | -1.508715 | -1.564262 |
| H | -2.750568 | -1.412258 | 2.513486  |
| C | 3.717866  | -1.529308 | 0.251796  |
| H | 4.591511  | -2.135254 | 0.476798  |
| O | 0.154111  | 2.184700  | 0.450337  |
| C | -0.685166 | 3.335487  | 0.349898  |
| H | -1.742998 | 3.060781  | 0.446265  |
| H | -0.411247 | 3.997060  | 1.174761  |
| H | -0.529238 | 3.857349  | -0.602553 |
| C | -3.553117 | -1.551487 | 0.515382  |
| H | -4.397359 | -2.167651 | 0.813548  |

**Phosph-Py,Ph,OMe**

|   |           |           |           |
|---|-----------|-----------|-----------|
| C | -2.504691 | -1.326628 | 1.322246  |
| C | -1.375389 | -0.652571 | 0.866448  |
| C | -1.415922 | 0.070957  | -0.334647 |
| C | -2.609542 | 0.100891  | -1.067253 |
| C | -3.741914 | -0.574302 | -0.611123 |
| H | -2.461411 | -1.883492 | 2.254412  |
| H | -0.459762 | -0.694603 | 1.450277  |
| H | -2.656130 | 0.652291  | -2.003941 |
| H | -4.660015 | -0.545394 | -1.191515 |
| P | -0.008295 | 1.030908  | -1.024680 |
| C | -3.689384 | -1.287985 | 0.584149  |
| H | -4.568756 | -1.817634 | 0.940979  |
| O | 0.079504  | 2.391989  | -0.075556 |
| C | 1.428874  | 0.043032  | -0.425671 |
| C | 1.500342  | -1.334744 | -0.655468 |
| C | 2.549097  | 0.658473  | 0.137618  |
| C | 2.655888  | -2.021522 | -0.300957 |
| H | 0.671678  | -1.880808 | -1.098540 |
| C | 3.656928  | -0.118765 | 0.463505  |
| H | 2.570725  | 1.727310  | 0.329883  |
| H | 2.724362  | -3.093676 | -0.469262 |
| H | 4.531816  | 0.344356  | 0.913726  |
| C | -0.098165 | 2.364880  | 1.344322  |
| H | 0.512322  | 1.587066  | 1.815051  |
| H | 0.216396  | 3.343602  | 1.713706  |
| H | -1.152018 | 2.202683  | 1.592734  |
| N | 3.726065  | -1.438789 | 0.255447  |

**Phosph-PyH<sup>+</sup>,Ph,OMe**

|   |           |           |           |
|---|-----------|-----------|-----------|
| C | -2.401593 | -1.529429 | 1.151700  |
| C | -1.277379 | -0.860544 | 0.710831  |
| C | -1.380755 | 0.038117  | -0.356674 |
| C | -2.632958 | 0.235494  | -0.948832 |
| C | -3.733717 | -0.451573 | -0.475057 |
| H | -2.401923 | -2.236276 | 1.972169  |
| H | -0.334111 | -1.049270 | 1.210858  |
| H | -2.762865 | 0.919082  | -1.781592 |
| H | -4.732098 | -0.352895 | -0.882086 |
| P | 0.033463  | 1.046797  | -1.045734 |
| O | -0.019123 | 2.376322  | -0.064264 |
| C | 1.479540  | 0.097186  | -0.425740 |
| C | 1.628020  | -1.246110 | -0.797369 |
| C | 2.511918  | 0.728582  | 0.275791  |
| C | 2.774996  | -1.952716 | -0.444488 |
| H | 0.844577  | -1.751411 | -1.359375 |
| C | 3.659794  | 0.018763  | 0.628399  |
| H | 2.427665  | 1.776843  | 0.550573  |
| H | 2.874499  | -2.995930 | -0.731890 |
| H | 4.451913  | 0.518180  | 1.179716  |
| C | -0.253446 | 2.304916  | 1.349341  |
| H | 0.307634  | 1.488907  | 1.815279  |
| H | 0.078754  | 3.257764  | 1.766296  |
| H | -1.323144 | 2.173868  | 1.542238  |
| C | 3.792718  | -1.322065 | 0.272234  |
| H | 4.688041  | -1.873334 | 0.546544  |
| N | -3.581511 | -1.305990 | 0.549118  |
| H | -4.400163 | -1.809859 | 0.886730  |

**PhPy**

|   |           |           |           |
|---|-----------|-----------|-----------|
| C | 0.746892  | -0.000017 | 0.000090  |
| C | 1.478546  | -1.123931 | 0.399142  |
| C | 1.478457  | 1.123914  | -0.399087 |
| C | 2.867638  | -1.074693 | 0.380863  |
| H | 0.979493  | -2.026304 | 0.739778  |
| C | 2.867553  | 1.074739  | -0.380995 |
| H | 0.979309  | 2.026428  | -0.739249 |
| H | 3.445721  | -1.941297 | 0.693129  |
| H | 3.445576  | 1.941368  | -0.693302 |
| C | -0.738259 | 0.000020  | 0.000146  |
| C | -1.451232 | -1.145733 | -0.377114 |
| C | -1.451329 | 1.145739  | 0.377251  |
| C | -2.844270 | -1.144676 | -0.379042 |
| H | -0.915145 | -2.038290 | -0.689515 |
| C | -2.844351 | 1.144626  | 0.378932  |
| H | -0.915307 | 2.038272  | 0.689860  |
| H | -3.382401 | -2.038855 | -0.682105 |
| H | -3.382568 | 2.038764  | 0.681966  |
| N | 3.570162  | 0.000034  | -0.000099 |
| C | -3.545281 | -0.000035 | -0.000126 |
| H | -4.631993 | -0.000031 | -0.000225 |



**[BiPy·2H]<sup>2+</sup>**

|   |           |           |           |
|---|-----------|-----------|-----------|
| C | -0.742470 | 0.000173  | 0.000390  |
| C | -1.451131 | 1.140021  | -0.395240 |
| C | -1.451090 | -1.139745 | 0.395730  |
| C | -2.830050 | 1.115065  | -0.388953 |
| H | -0.943721 | 2.039420  | -0.725094 |
| C | -2.830044 | -1.115072 | 0.388674  |
| H | -0.943656 | -2.039070 | 0.725765  |
| H | -3.447654 | 1.953067  | -0.686023 |
| H | -3.447594 | -1.953261 | 0.685329  |
| C | 0.742469  | 0.000134  | 0.000315  |
| C | 1.451324  | 1.139913  | 0.395724  |
| C | 1.450890  | -1.139858 | -0.395245 |
| C | 2.830266  | 1.114947  | 0.388653  |
| H | 0.944117  | 2.039319  | 0.725878  |
| C | 2.829832  | -1.115185 | -0.388998 |
| H | 0.943256  | -2.039170 | -0.724980 |
| H | 3.448016  | 1.952991  | 0.685311  |
| H | 3.447245  | -1.953371 | -0.685949 |
| N | 3.469529  | -0.000169 | -0.000386 |
| N | -3.469528 | -0.000094 | -0.000311 |
| H | -4.488195 | -0.000240 | -0.000779 |
| H | 4.488196  | -0.000213 | -0.000871 |

**[BiPy·H]<sup>+</sup>**

|   |           |           |           |
|---|-----------|-----------|-----------|
| C | 0.786862  | 0.000222  | -0.000088 |
| C | 1.506229  | -1.133188 | -0.385637 |
| C | 1.506651  | 1.133416  | 0.385572  |
| C | 2.895812  | -1.080324 | -0.371994 |
| H | 1.004330  | -2.038748 | -0.712411 |
| C | 2.896174  | 1.080059  | 0.372038  |
| H | 1.005060  | 2.039154  | 0.712288  |
| H | 3.475354  | -1.948184 | -0.675848 |
| H | 3.476074  | 1.947739  | 0.675701  |
| C | -0.695261 | 0.000300  | 0.000190  |
| C | -1.411303 | 1.144132  | -0.378182 |
| C | -1.410962 | -1.143807 | 0.378367  |
| C | -2.788979 | 1.120561  | -0.370754 |
| H | -0.904559 | 2.048046  | -0.696257 |
| C | -2.788639 | -1.120771 | 0.370809  |
| H | -0.903766 | -2.047476 | 0.696448  |
| H | -3.406202 | 1.963274  | -0.655328 |
| H | -3.405601 | -1.963796 | 0.655018  |
| N | 3.592794  | -0.000231 | -0.000137 |
| N | -3.431476 | -0.000261 | -0.000153 |
| H |           | -4.449426 |           |

-0.000162

0.000502

**[PhPy·H]<sup>+</sup>**

|   |           |           |           |
|---|-----------|-----------|-----------|
| C | 0.697948  | 0.000024  | 0.000082  |
| C | 1.421526  | 1.143789  | -0.374714 |
| C | 1.421543  | -1.143721 | 0.374936  |
| C | 2.797979  | 1.121314  | -0.366235 |
| H | 0.918579  | 2.049047  | -0.694630 |
| C | 2.797984  | -1.121303 | 0.366165  |
| H | 0.918613  | -2.048992 | 0.694849  |
| H | 3.413957  | 1.965560  | -0.649241 |
| H | 3.413990  | -1.965531 | 0.649160  |
| C | -0.781209 | 0.000014  | 0.000064  |
| C | -1.490098 | 1.153929  | 0.361308  |
| C | -1.490021 | -1.153954 | -0.361197 |
| C | -2.881922 | 1.150257  | 0.365833  |
| H | -0.955822 | 2.050608  | 0.663621  |
| C | -2.881833 | -1.150301 | -0.365937 |
| H | -0.955683 | -2.050622 | -0.663441 |
| H | -3.421036 | 2.046716  | 0.658775  |
| H | -3.420882 | -2.046781 | -0.658926 |
| N | 3.443698  | 0.000005  | -0.000076 |
| H | 4.461177  | -0.000177 | -0.000613 |
| C | -3.580519 | -0.000020 | -0.000110 |
| H | -4.667046 | -0.000023 | -0.000182 |

**MeO-Py Couplings****[TS-I·2H]<sup>2+</sup>-Ph,OMe,ax-MeO-PyH<sup>+</sup>**

( $\nu_i = -316.16 \text{ cm}^{-1}$ )

|   |           |           |           |
|---|-----------|-----------|-----------|
| C | 1.442186  | 3.567193  | 1.422495  |
| C | 0.909501  | 2.287138  | 1.299626  |
| C | 0.646652  | 1.753942  | 0.029161  |
| C | 0.927517  | 2.517694  | -1.111496 |
| C | 1.437637  | 3.804593  | -0.978281 |
| H | 1.650221  | 3.965913  | 2.410887  |
| H | 0.710093  | 1.712673  | 2.198157  |
| H | 0.767428  | 2.112542  | -2.102459 |
| H | 1.642084  | 4.391571  | -1.868779 |
| P | -0.018163 | 0.067769  | -0.055242 |
| C | -1.494770 | -0.169317 | -1.130411 |
| C | -2.295450 | -1.294243 | -0.917031 |
| C | -1.880573 | 0.773109  | -2.083996 |
| C | -3.425777 | -1.476203 | -1.688990 |
| H | -2.068799 | -2.031762 | -0.155282 |
| C | -3.031380 | 0.559671  | -2.814618 |
| H | -1.313169 | 1.673698  | -2.273386 |
| H | -4.085886 | -2.328951 | -1.594447 |
| H | -3.398058 | 1.245011  | -3.568017 |
| C | 1.698694  | 4.330577  | 0.286128  |
| H | 2.105545  | 5.333021  | 0.384676  |
| C | -0.803660 | -0.179849 | 1.580190  |
| C | -1.936749 | 0.579163  | 1.907565  |
| C | -0.297964 | -1.097231 | 2.505308  |
| C | -2.552786 | 0.420426  | 3.143044  |
| H | -2.337369 | 1.303399  | 1.201295  |

|   |           |           |           |
|---|-----------|-----------|-----------|
| C | -0.920260 | -1.254579 | 3.744233  |
| H | 0.580876  | -1.693447 | 2.279269  |
| H | -3.428790 | 1.013528  | 3.389299  |
| H | -0.520806 | -1.969815 | 4.457481  |
| C | -2.044724 | -0.498841 | 4.063366  |
| H | -2.527438 | -0.623472 | 5.028647  |
| N | -3.753453 | -0.552468 | -2.603890 |
| H | -4.595723 | -0.697112 | -3.159736 |
| C | 1.245688  | -1.217238 | -0.232789 |
| C | 2.546525  | -0.925653 | 0.272032  |
| C | 0.948301  | -2.585872 | -0.502955 |
| C | 3.493622  | -1.911076 | 0.317452  |
| C | 1.940484  | -3.518866 | -0.439029 |
| H | 2.817724  | 0.069979  | 0.603188  |
| H | -0.040896 | -2.904167 | -0.806027 |
| H | 4.505179  | -1.737890 | 0.663951  |
| H | 1.782410  | -4.563977 | -0.675112 |
| N | 3.192061  | -3.174296 | -0.048754 |
| H | 3.909333  | -3.890373 | 0.003487  |
| O | 0.969779  | -0.310530 | -1.973497 |
| C | 2.214571  | 0.013618  | -2.527689 |
| H | 2.803898  | 0.696790  | -1.896252 |
| H | 2.814882  | -0.895490 | -2.695033 |
| H | 2.067519  | 0.504460  | -3.500583 |

**[TS-I·2H]<sup>2+</sup>-PyH<sup>+</sup>,OMe,ax-MeOPyH<sup>+</sup>**

( $\nu_i = -310.68 \text{ cm}^{-1}$ )

|   |           |           |           |
|---|-----------|-----------|-----------|
| C | 1.318639  | 3.588703  | 1.483515  |
| C | 0.646535  | 2.382586  | 1.300134  |
| C | 0.928188  | 1.597823  | 0.177299  |
| C | 1.885212  | 2.015591  | -0.752964 |
| C | 2.563881  | 3.212977  | -0.553097 |
| H | 1.093468  | 4.200201  | 2.352229  |
| H | -0.083018 | 2.062643  | 2.039021  |
| H | 2.095163  | 1.416684  | -1.634699 |
| H | 3.311458  | 3.532873  | -1.272855 |
| P | 0.054093  | 0.046168  | -0.138825 |
| C | 0.209039  | -0.844466 | 1.510150  |
| C | -0.677569 | -1.888487 | 1.799291  |
| C | 1.195291  | -0.530005 | 2.450828  |
| C | -0.570444 | -2.570990 | 2.994311  |
| H | -1.456348 | -2.194679 | 1.110573  |
| C | 1.268137  | -1.239075 | 3.633619  |
| H | 1.924815  | 0.252871  | 2.280282  |
| H | -1.221968 | -3.385928 | 3.282953  |
| H | 2.005440  | -1.050010 | 4.403310  |
| C | 2.277551  | 4.002350  | 0.560939  |
| H | 2.804015  | 4.940755  | 0.710337  |
| C | 0.975960  | -1.099465 | -1.210715 |
| C | 2.137593  | -1.683252 | -0.685405 |
| C | 0.588999  | -1.394086 | -2.523687 |
| C | 2.898448  | -2.549728 | -1.463873 |
| H | 2.474649  | -1.462427 | 0.321889  |
| C | 1.344734  | -2.279473 | -3.287488 |
| H | -0.288175 | -0.928140 | -2.952673 |
| H | 3.802384  | -2.985536 | -1.048926 |

|   |           |           |           |
|---|-----------|-----------|-----------|
| H | 1.030444  | -2.508391 | -4.301588 |
| C | 2.498985  | -2.856865 | -2.763016 |
| H | 3.088878  | -3.540872 | -3.366576 |
| N | 0.388589  | -2.224706 | 3.867003  |
| H | 0.453066  | -2.735276 | 4.746978  |
| C | -1.740865 | 0.126761  | -0.388345 |
| C | -2.468517 | -0.971232 | -0.953078 |
| C | -2.510191 | 1.093849  | 0.331568  |
| C | -3.829818 | -0.947494 | -0.969743 |
| C | -3.873837 | 1.056260  | 0.274813  |
| H | -1.956434 | -1.813890 | -1.401839 |
| H | -2.041223 | 1.889326  | 0.896602  |
| H | -4.425369 | -1.730172 | -1.423439 |
| H | -4.500124 | 1.790550  | 0.766938  |
| N | -4.515003 | 0.067533  | -0.386792 |
| H | -5.528998 | 0.054927  | -0.402168 |
| O | -0.815131 | 0.936184  | -1.843747 |
| C | -1.125739 | 2.295297  | -2.025266 |
| H | -0.933299 | 2.906531  | -1.131724 |
| H | -0.510902 | 2.691861  | -2.843713 |
| H | -2.184660 | 2.408851  | -2.298776 |

***Molecular Coordinates Used in the COSMO-RS Study***

EtOH (in gas phase)

|   |           |           |           |
|---|-----------|-----------|-----------|
| C | 1.221003  | -0.221581 | -0.000002 |
| H | 1.288465  | -0.858986 | 0.887113  |
| H | 2.070778  | 0.469551  | 0.000405  |
| H | 1.288835  | -0.858403 | -0.887504 |
| C | -0.085445 | 0.547513  | -0.000001 |
| H | -0.143619 | 1.192112  | 0.889449  |
| H | -0.143625 | 1.192114  | -0.889450 |
| O | -1.148091 | -0.395809 | 0.000002  |
| H | -1.989455 | 0.074490  | -0.000008 |

EtOH (optimized with SMD in EtOH)

|   |           |           |           |
|---|-----------|-----------|-----------|
| C | 1.225396  | -0.221402 | 0.000002  |
| H | 1.305368  | -0.856258 | 0.889898  |
| H | 2.068666  | 0.478274  | 0.000352  |
| H | 1.305682  | -0.855759 | -0.890220 |
| C | -0.080173 | 0.544623  | -0.000004 |
| H | -0.147658 | 1.185829  | 0.888786  |
| H | -0.147652 | 1.185820  | -0.888801 |
| O | -1.157913 | -0.396258 | -0.000007 |
| H | -1.992442 | 0.092832  | 0.000053  |

**[Int-III·2H]<sup>2+</sup>·PyH<sup>+</sup>·OMe<sub>ax</sub>-a** (in gas phase)

|   |           |           |          |
|---|-----------|-----------|----------|
| C | -0.457074 | 1.802509  | 3.288322 |
| C | -0.624563 | 1.391601  | 1.984295 |
| C | 0.140467  | 0.340651  | 1.442786 |
| C | 1.103346  | -0.229930 | 2.290379 |
| C | 1.250387  | 0.200847  | 3.595256 |
| H | -1.037754 | 2.589608  | 3.755240 |
| H | -1.394689 | 1.882128  | 1.395795 |
| H | 1.738727  | -1.042369 | 1.953263 |
| H | 1.963742  | -0.223599 | 4.292501 |

|   |           |           |           |
|---|-----------|-----------|-----------|
| P | -0.087173 | -0.162822 | -0.524056 |
| C | -1.913166 | -0.152159 | -0.357717 |
| C | -2.557493 | -0.688908 | 0.766880  |
| C | -2.695007 | 0.366913  | -1.399116 |
| C | -3.945286 | -0.717671 | 0.840779  |
| H | -1.989604 | -1.095763 | 1.597744  |
| C | -4.084438 | 0.370561  | -1.306101 |
| H | -2.221422 | 0.745770  | -2.298410 |
| H | -4.429089 | -1.161379 | 1.705159  |
| H | -4.675220 | 0.784131  | -2.117206 |
| C | 0.824964  | -1.730382 | -0.322190 |
| C | 0.354815  | -2.747538 | 0.514854  |
| C | 1.994765  | -1.933816 | -1.063869 |
| C | 1.052213  | -3.948068 | 0.615115  |
| H | -0.563537 | -2.625617 | 1.080241  |
| C | 2.706911  | -3.123949 | -0.936224 |
| H | 2.334642  | -1.181850 | -1.771148 |
| H | 0.667074  | -4.742034 | 1.247102  |
| H | 3.615646  | -3.272286 | -1.511044 |
| O | -0.071997 | -0.195034 | -2.222498 |
| C | 0.865611  | 1.420029  | -0.821351 |
| C | 2.246498  | 1.496419  | -0.593136 |
| C | 0.207354  | 2.553456  | -1.320212 |
| C | 2.930133  | 2.652660  | -0.903292 |
| H | 2.804747  | 0.654609  | -0.197107 |
| C | 0.925122  | 3.695298  | -1.601307 |
| H | -0.857725 | 2.545139  | -1.521988 |
| H | 4.000727  | 2.767769  | -0.780731 |
| H | 0.481928  | 4.598423  | -2.004383 |
| C | -0.524921 | -1.306656 | -2.999211 |
| H | 0.307609  | -1.985102 | -3.204714 |
| H | -1.321649 | -1.859985 | -2.489625 |
| H | -0.911642 | -0.908881 | -3.939333 |
| C | 2.235709  | -4.132370 | -0.098246 |
| H | 2.780299  | -5.067408 | -0.013878 |
| C | -4.712059 | -0.177928 | -0.191218 |
| H | -5.795533 | -0.193431 | -0.128402 |
| N | 0.468936  | 1.193941  | 4.059319  |
| N | 2.258005  | 3.711978  | -1.395744 |
| H | 2.777649  | 4.553354  | -1.631897 |
| H | 0.574315  | 1.490526  | 5.025772  |

**[Int-III·H]<sup>+</sup>-PyH<sup>+</sup>,OMe,ax-b** (in gas phase)

|   |           |           |           |
|---|-----------|-----------|-----------|
| C | -1.871722 | -2.975711 | -2.181909 |
| C | -1.551009 | -1.666926 | -1.825519 |
| C | -0.362195 | -1.434651 | -1.136758 |
| C | 0.458591  | -2.529359 | -0.861258 |
| C | 0.057200  | -3.791643 | -1.290717 |
| H | -2.800677 | -3.185739 | -2.706203 |
| H | -2.222170 | -0.858057 | -2.091923 |
| H | 1.397939  | -2.421818 | -0.326342 |
| H | 0.689511  | -4.657338 | -1.108477 |
| P | 0.070704  | 0.261747  | -0.560291 |
| C | -1.230728 | 1.499598  | -0.145787 |
| C | -2.149938 | 1.876373  | -1.132845 |
| C | -1.325808 | 2.092378  | 1.120150  |

|   |           |           |           |
|---|-----------|-----------|-----------|
| C | -3.152648 | 2.801076  | -0.852432 |
| H | -2.067474 | 1.459943  | -2.130734 |
| C | -2.304710 | 3.043286  | 1.389198  |
| H | -0.638408 | 1.819574  | 1.915212  |
| H | -3.864765 | 3.070153  | -1.626358 |
| H | -2.348277 | 3.508510  | 2.369265  |
| C | 1.819284  | 0.669754  | -0.216956 |
| C | 2.181931  | 1.653347  | 0.706306  |
| C | 2.813480  | 0.010397  | -0.947112 |
| C | 3.525177  | 1.960776  | 0.910985  |
| H | 1.425135  | 2.199153  | 1.261285  |
| C | 4.156532  | 0.302447  | -0.722107 |
| H | 2.541266  | -0.713399 | -1.710300 |
| H | 3.796733  | 2.739340  | 1.617409  |
| H | 4.921786  | -0.219391 | -1.288471 |
| O | 0.158722  | 0.698717  | -2.203494 |
| C | -0.165293 | -0.577895 | 1.304140  |
| C | -1.458431 | -0.991863 | 1.684338  |
| C | 0.879886  | -0.934601 | 2.171692  |
| C | -1.673182 | -1.708182 | 2.835788  |
| H | -2.317945 | -0.756682 | 1.063189  |
| C | 0.637396  | -1.654533 | 3.323312  |
| H | 1.905990  | -0.656876 | 1.953894  |
| H | -2.646690 | -2.051875 | 3.164488  |
| H | 1.411222  | -1.955054 | 4.020137  |
| C | 0.656879  | 1.952327  | -2.643621 |
| H | 1.752393  | 1.946933  | -2.667002 |
| H | 0.277555  | 2.112211  | -3.655499 |
| H | 0.320142  | 2.779492  | -2.004888 |
| C | 4.514529  | 1.276916  | 0.207421  |
| H | 5.561149  | 1.514066  | 0.371587  |
| C | -3.228487 | 3.391776  | 0.405718  |
| H | -3.999896 | 4.125407  | 0.618705  |
| N | -1.091915 | -4.027179 | -1.926037 |
| N | -0.621988 | -2.022830 | 3.627007  |
| H | -0.787929 | -2.554952 | 4.474392  |

**[Int-IV·2H]<sup>2+</sup>-PyH<sup>+</sup>,OMe,ax-b** (in gas phase)

|   |           |           |           |
|---|-----------|-----------|-----------|
| C | -3.869463 | 1.661507  | 0.297159  |
| C | -2.685414 | 1.252908  | -0.304356 |
| C | -2.021153 | 0.105076  | 0.166985  |
| C | -2.573856 | -0.642522 | 1.216475  |
| C | -3.760624 | -0.222745 | 1.811136  |
| H | -4.386856 | 2.540908  | -0.072771 |
| H | -2.296359 | 1.806954  | -1.153875 |
| H | -2.103969 | -1.559253 | 1.556908  |
| H | -4.193233 | -0.807350 | 2.616617  |
| P | -0.505907 | -0.385327 | -0.654800 |
| C | 0.165957  | -1.918384 | -0.016604 |
| C | 0.496788  | -2.939806 | -0.916370 |
| C | 0.447206  | -2.068679 | 1.351181  |
| C | 1.078534  | -4.113686 | -0.445104 |
| H | 0.311766  | -2.820671 | -1.979409 |
| C | 1.029488  | -3.243715 | 1.810994  |
| H | 0.202569  | -1.282717 | 2.061514  |
| H | 1.325724  | -4.908268 | -1.141534 |

|   |           |           |           |
|---|-----------|-----------|-----------|
| H | 1.232987  | -3.368323 | 2.869806  |
| C | 1.353091  | 1.204455  | 0.764243  |
| C | 2.699864  | 1.066437  | 1.122352  |
| C | 0.465686  | 1.708235  | 1.730849  |
| C | 3.121197  | 1.411139  | 2.389580  |
| H | 3.433900  | 0.715364  | 0.407028  |
| C | 0.925394  | 2.045454  | 2.985381  |
| H | -0.586804 | 1.856754  | 1.515420  |
| H | 4.150071  | 1.330442  | 2.720412  |
| H | 0.291568  | 2.446981  | 3.767227  |
| C | -4.401964 | 0.929182  | 1.359895  |
| H | -5.331249 | 1.247038  | 1.822242  |
| O | -0.779194 | -0.518597 | -2.213609 |
| C | 0.892003  | 0.914227  | -0.669940 |
| C | 0.424957  | 2.211902  | -1.294950 |
| C | 1.969725  | 0.291373  | -1.527660 |
| C | 0.802270  | 2.593043  | -2.529001 |
| H | -0.216818 | 2.870425  | -0.720724 |
| C | 2.263621  | 0.746795  | -2.758963 |
| H | 2.469106  | -0.604557 | -1.173495 |
| H | 0.456374  | 3.524427  | -2.962804 |
| H | 3.006961  | 0.260223  | -3.380156 |
| C | -1.961686 | -1.172391 | -2.744380 |
| H | -2.841703 | -0.556981 | -2.549522 |
| H | -1.785126 | -1.254344 | -3.815152 |
| H | -2.085001 | -2.164473 | -2.303297 |
| N | 2.230490  | 1.885678  | 3.281466  |
| N | 1.663083  | 1.854330  | -3.297948 |
| C | 1.340847  | -4.266914 | 0.914192  |
| H | 1.788781  | -5.186051 | 1.278376  |
| H | 1.951349  | 2.195677  | -4.202747 |
| H | 2.558297  | 2.149074  | 4.207624  |

**[Int-IV·H]<sup>+</sup>-Py,OMe,ax-b** (in gas phase)

|   |           |           |           |
|---|-----------|-----------|-----------|
| C | -4.103376 | -0.797506 | 0.458300  |
| C | -2.971731 | -0.101775 | 0.050500  |
| C | -1.794909 | -0.802550 | -0.261698 |
| C | -1.773060 | -2.199799 | -0.189104 |
| C | -2.911499 | -2.887259 | 0.221583  |
| H | -5.012335 | -0.255160 | 0.698354  |
| H | -3.005088 | 0.980683  | -0.034577 |
| H | -0.882327 | -2.757088 | -0.458631 |
| H | -2.892541 | -3.970894 | 0.277515  |
| P | -0.360574 | 0.160128  | -0.753197 |
| C | 1.011703  | -0.872363 | -1.279411 |
| C | 1.606915  | -0.618809 | -2.521839 |
| C | 1.555342  | -1.846403 | -0.427376 |
| C | 2.718174  | -1.355515 | -2.920589 |
| H | 1.216804  | 0.159610  | -3.170128 |
| C | 2.666025  | -2.575816 | -0.835009 |
| H | 1.129812  | -2.030055 | 0.554925  |
| H | 3.175182  | -1.159871 | -3.885325 |
| H | 3.083855  | -3.328357 | -0.174020 |
| C | 0.819494  | 0.570288  | 1.685748  |
| C | 2.175866  | 0.545530  | 2.001439  |
| C | -0.029558 | -0.227793 | 2.459565  |

|   |           |           |           |
|---|-----------|-----------|-----------|
| C | 2.618680  | -0.285982 | 3.029100  |
| H | 2.895017  | 1.162305  | 1.475547  |
| C | 0.513615  | -1.023857 | 3.463966  |
| H | -1.102715 | -0.249013 | 2.297955  |
| H | 3.674974  | -0.320463 | 3.283628  |
| H | -0.132269 | -1.654290 | 4.070014  |
| C | -4.070664 | -2.189055 | 0.552005  |
| H | -4.955581 | -2.730323 | 0.872029  |
| O | -0.799287 | 1.098429  | -1.970597 |
| C | 0.267874  | 1.412245  | 0.530259  |
| C | -0.847922 | 2.323956  | 0.983849  |
| C | 1.308565  | 2.213859  | -0.216333 |
| C | -0.970515 | 3.586875  | 0.543951  |
| H | -1.546749 | 1.960266  | 1.727851  |
| C | 1.087602  | 3.474210  | -0.623764 |
| H | 2.244674  | 1.739423  | -0.486836 |
| H | -1.767266 | 4.235679  | 0.889784  |
| H | 1.828014  | 4.026873  | -1.190668 |
| C | -1.606522 | 0.609579  | -3.061204 |
| H | -2.634879 | 0.459146  | -2.725665 |
| H | -1.568540 | 1.387614  | -3.822360 |
| H | -1.202677 | -0.325556 | -3.459403 |
| N | 1.817013  | -1.073836 | 3.746113  |
| N | -0.072679 | 4.152895  | -0.332093 |
| C | 3.243859  | -2.334954 | -2.081024 |
| H | 4.111105  | -2.907850 | -2.394335 |
| H | -0.147670 | 5.131919  | -0.558523 |

**[Int-V·2H]<sup>2+</sup>-PyH<sup>+</sup>,OMe,ax-a** (in gas phase)

|   |           |           |           |
|---|-----------|-----------|-----------|
| C | -3.200766 | -3.544044 | -1.202714 |
| C | -2.088208 | -2.744408 | -0.953752 |
| C | -2.232636 | -1.502786 | -0.319376 |
| C | -3.513801 | -1.067809 | 0.050474  |
| C | -4.624068 | -1.865419 | -0.202912 |
| H | -3.081413 | -4.503204 | -1.696717 |
| H | -1.102563 | -3.085651 | -1.263165 |
| H | -3.649396 | -0.102113 | 0.530334  |
| H | -5.613123 | -1.522293 | 0.084238  |
| P | -0.707964 | -0.560432 | 0.002097  |
| C | -1.338908 | 1.167993  | 0.103720  |
| C | -1.289464 | 1.935067  | 1.272958  |
| C | -1.795216 | 1.771687  | -1.078264 |
| C | -1.695664 | 3.271334  | 1.266480  |
| H | -0.941031 | 1.487958  | 2.200029  |
| C | -2.191560 | 3.107289  | -1.090076 |
| H | -1.869123 | 1.186680  | -1.993770 |
| H | -1.689262 | 3.842618  | 2.191092  |
| H | -2.570584 | 3.551045  | -2.006522 |
| C | 2.499404  | 0.868426  | -0.279536 |
| C | 2.270234  | 1.665005  | 0.844749  |
| C | 2.073884  | 1.317202  | -1.535891 |
| C | 1.606557  | 2.867905  | 0.696090  |
| H | 2.591441  | 1.359314  | 1.833983  |
| C | 1.401368  | 2.517392  | -1.630677 |
| H | 2.210041  | 0.717360  | -2.428642 |
| H | 1.381468  | 3.531799  | 1.521003  |



|   |           |           |           |
|---|-----------|-----------|-----------|
| H | 1.006312  | 2.911144  | -2.558900 |
| C | -4.467704 | -3.103981 | -0.826267 |
| H | -5.337244 | -3.722924 | -1.024713 |
| O | -0.300619 | -0.882942 | 1.593180  |
| C | 3.177038  | -0.448920 | -0.134074 |
| C | 4.284036  | -0.771208 | -0.928341 |
| C | 2.707286  | -1.377438 | 0.804707  |
| C | 4.901677  | -1.995657 | -0.765744 |
| H | 4.684077  | -0.074119 | -1.656828 |
| C | 3.354487  | -2.590929 | 0.925994  |
| H | 1.817307  | -1.183680 | 1.403490  |
| H | 5.767878  | -2.311159 | -1.335459 |
| H | 3.047224  | -3.364005 | 1.620444  |
| C | -1.279860 | -1.225746 | 2.587283  |
| H | -1.715483 | -2.203753 | 2.367149  |
| H | -0.753173 | -1.259155 | 3.542451  |
| H | -2.079871 | -0.480797 | 2.635307  |
| N | 1.199890  | 3.254791  | -0.522994 |
| N | 4.422442  | -2.859503 | 0.148716  |
| C | -2.137894 | 3.864312  | 0.084077  |
| H | -2.477837 | 4.896035  | 0.083931  |
| H | 4.888812  | -3.757660 | 0.257717  |
| H | 0.632307  | 4.097967  | -0.596849 |

**[Int-V·H]<sup>+</sup>-Py,OMe,ax-a** (in gas phase)

|   |           |           |           |
|---|-----------|-----------|-----------|
| C | 5.281576  | 0.228471  | -1.253566 |
| C | 3.984705  | 0.675649  | -1.010072 |
| C | 3.081321  | -0.110786 | -0.284168 |
| C | 3.499907  | -1.362436 | 0.188920  |
| C | 4.793448  | -1.810956 | -0.055894 |
| H | 5.971932  | 0.846154  | -1.819977 |
| H | 3.670781  | 1.643934  | -1.394022 |
| H | 2.811020  | -1.994476 | 0.742914  |
| H | 5.107247  | -2.782506 | 0.313922  |
| P | 1.422176  | 0.603171  | 0.018009  |
| C | 0.392208  | -0.908021 | 0.229455  |
| C | -0.449298 | -1.076474 | 1.333159  |
| C | 0.350064  | -1.858936 | -0.799474 |
| C | -1.305497 | -2.173815 | 1.416049  |
| H | -0.424934 | -0.353749 | 2.145029  |
| C | -0.502831 | -2.955597 | -0.716608 |
| H | 1.004088  | -1.757143 | -1.663332 |
| H | -1.946162 | -2.295574 | 2.284768  |
| H | -0.513165 | -3.691477 | -1.515620 |
| C | -3.120775 | 0.442751  | -0.363768 |
| C | -4.101747 | 0.267399  | 0.615956  |
| C | -3.015055 | -0.518664 | -1.368942 |
| C | -4.923348 | -0.852784 | 0.541525  |
| H | -4.252937 | 0.994960  | 1.407914  |
| C | -3.881042 | -1.608338 | -1.341048 |
| H | -2.242634 | -0.464670 | -2.129488 |
| H | -5.703023 | -1.010864 | 1.281813  |
| H | -3.807374 | -2.382913 | -2.099545 |
| C | 5.685571  | -1.015372 | -0.775390 |
| H | 6.694156  | -1.369296 | -0.966987 |
| O | 1.494837  | 1.212084  | 1.571787  |

|   |           |           |           |
|---|-----------|-----------|-----------|
| C | -2.195881 | 1.591608  | -0.323763 |
| C | -1.749893 | 2.207496  | -1.505427 |
| C | -1.708585 | 2.080778  | 0.897087  |
| C | -0.844795 | 3.240066  | -1.443139 |
| H | -2.113600 | 1.884683  | -2.473851 |
| C | -0.796177 | 3.110106  | 0.915065  |
| H | -1.996749 | 1.622559  | 1.835084  |
| H | -0.455958 | 3.747971  | -2.316784 |
| H | -0.346420 | 3.494050  | 1.821073  |
| C | 2.233540  | 0.566451  | 2.611938  |
| H | 3.307564  | 0.629253  | 2.413704  |
| H | 2.000150  | 1.098436  | 3.536383  |
| H | 1.945814  | -0.485660 | 2.714132  |
| N | -4.819868 | -1.782018 | -0.411228 |
| N | -0.398443 | 3.666018  | -0.244757 |
| C | -1.335800 | -3.114843 | 0.390838  |
| H | -2.003928 | -3.968303 | 0.454121  |
| H | 0.301287  | 4.399866  | -0.216189 |

**[Int-V]-Py,OMe,ax-a** (in gas phase)

|   |           |           |           |
|---|-----------|-----------|-----------|
| C | 0.367932  | -1.574268 | 2.773782  |
| C | -0.156578 | -0.562910 | 1.969906  |
| C | -0.460917 | -0.816843 | 0.630716  |
| C | -0.233833 | -2.095098 | 0.110608  |
| C | 0.286769  | -3.105146 | 0.912659  |
| H | 0.601460  | -1.367493 | 3.815176  |
| H | -0.319676 | 0.431536  | 2.373996  |
| H | -0.449883 | -2.302748 | -0.935472 |
| H | 0.472620  | -4.087690 | 0.489065  |
| P | -1.103844 | 0.467721  | -0.509935 |
| C | -2.905196 | 0.078050  | -0.447389 |
| C | -3.573097 | -0.195275 | -1.643052 |
| C | -3.623808 | 0.065636  | 0.754404  |
| C | -4.936751 | -0.493425 | -1.641550 |
| H | -3.025493 | -0.172471 | -2.583103 |
| C | -4.984563 | -0.218755 | 0.757208  |
| H | -3.109726 | 0.279265  | 1.688422  |
| H | -5.446281 | -0.709448 | -2.576466 |
| H | -5.535462 | -0.226039 | 1.693728  |
| C | 2.696868  | -0.248876 | -0.696060 |
| C | 2.194659  | -0.708812 | -1.916647 |
| C | 3.369681  | -1.176384 | 0.101725  |
| C | 2.381797  | -2.040510 | -2.269386 |
| H | 1.626008  | -0.054946 | -2.570145 |
| C | 3.497165  | -2.488624 | -0.341353 |
| H | 3.800376  | -0.889131 | 1.055694  |
| H | 1.989642  | -2.414312 | -3.212728 |
| H | 4.012610  | -3.222781 | 0.273503  |
| C | 0.592245  | -2.844756 | 2.247830  |
| H | 1.007269  | -3.629443 | 2.874405  |
| O | -1.006981 | 1.751426  | 0.548594  |
| C | 2.501185  | 1.156051  | -0.260856 |
| C | 2.367527  | 1.488546  | 1.088482  |
| C | 2.420294  | 2.204623  | -1.181877 |
| C | 2.149570  | 2.814837  | 1.444666  |
| H | 2.385177  | 0.722163  | 1.856059  |

|   |           |           |           |
|---|-----------|-----------|-----------|
| C | 2.205338  | 3.498965  | -0.721410 |
| H | 2.539045  | 2.026621  | -2.246166 |
| H | 2.024996  | 3.084049  | 2.491033  |
| H | 2.142514  | 4.325096  | -1.426323 |
| C | -1.315591 | 3.032836  | 0.020986  |
| H | -2.398044 | 3.141869  | -0.125662 |
| H | -0.966843 | 3.768340  | 0.748148  |
| H | -0.799319 | 3.204527  | -0.932318 |
| N | 3.017779  | -2.932597 | -1.505473 |
| N | 2.064323  | 3.817893  | 0.568107  |
| C | -5.641973 | -0.503370 | -0.441959 |
| H | -6.704530 | -0.730212 | -0.437610 |

**[Int-III]-Py,OMe,ax-b** (in gas phase)

|   |           |           |           |
|---|-----------|-----------|-----------|
| C | 0.893724  | 4.035952  | -0.634811 |
| C | 0.959420  | 2.646832  | -0.708775 |
| C | -0.139576 | 1.869850  | -0.334457 |
| C | -1.312727 | 2.499799  | 0.083575  |
| C | -1.382300 | 3.890274  | 0.141109  |
| H | 1.757286  | 4.630023  | -0.919906 |
| H | 1.865906  | 2.169267  | -1.070452 |
| H | -2.183011 | 1.913805  | 0.364664  |
| H | -2.303033 | 4.368920  | 0.462115  |
| P | -0.019175 | 0.041731  | -0.465139 |
| C | -1.600847 | -0.949317 | -0.433393 |
| C | -1.894418 | -1.864868 | -1.444548 |
| C | -2.537847 | -0.816606 | 0.593255  |
| C | -3.073591 | -2.602757 | -1.373151 |
| H | -1.227371 | -1.992478 | -2.288480 |
| C | -3.707939 | -1.570527 | 0.548895  |
| H | -2.367537 | -0.155606 | 1.436599  |
| H | -3.303547 | -3.337569 | -2.141262 |
| H | -4.456351 | -1.460132 | 1.330042  |
| C | 0.180183  | -0.220031 | 1.461712  |
| C | 0.280883  | -1.532183 | 1.942872  |
| C | 0.278083  | 0.785918  | 2.422524  |
| C | 0.457597  | -1.770222 | 3.298742  |
| H | 0.225981  | -2.380589 | 1.263201  |
| C | 0.457349  | 0.449284  | 3.767476  |
| H | 0.225278  | 1.836427  | 2.153988  |
| H | 0.534400  | -2.788881 | 3.672978  |
| H | 0.534000  | 1.233775  | 4.518268  |
| C | -0.276739 | 4.661372  | -0.209311 |
| H | -0.329180 | 5.745022  | -0.158273 |
| O | -0.110962 | 0.148664  | -2.225096 |
| C | 1.643082  | -0.723412 | -0.744886 |
| C | 2.723287  | -0.344365 | 0.058980  |
| C | 1.848765  | -1.679971 | -1.743738 |
| C | 3.985051  | -0.897360 | -0.141316 |
| H | 2.588377  | 0.383876  | 0.852916  |
| C | 3.100618  | -2.265262 | -1.913689 |
| H | 1.035087  | -1.956635 | -2.402266 |
| H | 4.815319  | -0.576942 | 0.481285  |
| H | 3.238335  | -3.021421 | -2.681295 |
| C | -1.121721 | 0.863012  | -2.892474 |
| H | -0.896794 | 1.937852  | -2.921996 |

|   |           |           |           |
|---|-----------|-----------|-----------|
| H | -1.174270 | 0.485967  | -3.919583 |
| H | -2.112615 | 0.732414  | -2.430936 |
| C | 4.174352  | -1.870170 | -1.119460 |
| H | 5.153957  | -2.317243 | -1.262804 |
| N | 0.545483  | -0.800392 | 4.218277  |
| N | -3.981632 | -2.461978 | -0.405667 |

**[TS-I-2H]<sup>2+</sup>-PyH<sup>+</sup>,OMe,ax-b** (in gas phase)

|   |           |           |           |
|---|-----------|-----------|-----------|
| C | -4.046648 | -1.196231 | -0.504226 |
| C | -2.749231 | -0.928981 | -0.929477 |
| C | -1.676128 | -1.047206 | -0.031503 |
| C | -1.913099 | -1.482120 | 1.277244  |
| C | -3.211306 | -1.763215 | 1.690369  |
| H | -4.872002 | -1.103865 | -1.202851 |
| H | -2.574604 | -0.666205 | -1.969700 |
| H | -1.098583 | -1.623201 | 1.976756  |
| H | -3.387751 | -2.114950 | 2.701791  |
| P | -0.032475 | -0.724148 | -0.690079 |
| C | 1.396996  | -1.395396 | 0.186347  |
| C | 2.401723  | -1.960409 | -0.617082 |
| C | 1.545490  | -1.411009 | 1.580753  |
| C | 3.532266  | -2.523717 | -0.033010 |
| H | 2.302684  | -1.967911 | -1.698324 |
| C | 2.668485  | -1.991853 | 2.157260  |
| H | 0.801174  | -0.962071 | 2.227382  |
| H | 4.303011  | -2.955031 | -0.663527 |
| H | 2.766801  | -2.013323 | 3.237925  |
| C | 0.045845  | 1.268258  | 0.916477  |
| C | 1.224924  | 1.774081  | 1.481978  |
| C | -1.164861 | 1.743298  | 1.442970  |
| C | 1.186557  | 2.667721  | 2.531300  |
| H | 2.201093  | 1.462440  | 1.116810  |
| C | -1.178998 | 2.641836  | 2.490475  |
| H | -2.122347 | 1.406583  | 1.053499  |
| H | 2.065165  | 3.075286  | 3.018618  |
| H | -2.082739 | 3.030670  | 2.946171  |
| C | -4.278698 | -1.608687 | 0.806982  |
| H | -5.289581 | -1.830525 | 1.134201  |
| O | -0.032537 | -1.501942 | -2.107616 |
| C | 0.243224  | 0.937305  | -1.314420 |
| C | -0.814031 | 1.751186  | -1.820173 |
| C | 1.572485  | 1.332194  | -1.650495 |
| C | -0.529805 | 2.922263  | -2.460749 |
| H | -1.852436 | 1.474290  | -1.688056 |
| C | 1.794660  | 2.514713  | -2.297426 |
| H | 2.422830  | 0.706514  | -1.404543 |
| H | -1.297359 | 3.580915  | -2.849476 |
| H | 2.785626  | 2.860097  | -2.567888 |
| C | -0.340303 | -2.904829 | -2.254615 |
| H | -1.394779 | -3.082313 | -2.030323 |
| H | -0.133499 | -3.145275 | -3.296280 |
| H | 0.290160  | -3.510268 | -1.597517 |
| N | -0.009942 | 3.073862  | 3.008063  |
| H | -0.030694 | 3.728049  | 3.784785  |
| N | 0.756336  | 3.300184  | -2.672823 |
| H | 0.942322  | 4.155480  | -3.184621 |

|   |          |           |          |
|---|----------|-----------|----------|
| C | 3.663700 | -2.546859 | 1.353082 |
| H | 4.538698 | -3.000004 | 1.808231 |

**[TS-I-H]<sup>+</sup>-Py,OMe,ax-a** (in gas phase)

|   |           |           |           |
|---|-----------|-----------|-----------|
| C | -3.857004 | -1.811078 | -0.564265 |
| C | -2.621609 | -1.312053 | -0.967103 |
| C | -1.577615 | -1.178367 | -0.041130 |
| C | -1.783371 | -1.571665 | 1.285024  |
| C | -3.009709 | -2.096160 | 1.676435  |
| H | -4.661846 | -1.900486 | -1.287097 |
| H | -2.466098 | -1.040669 | -2.007365 |
| H | -1.006337 | -1.449342 | 2.028873  |
| H | -3.155142 | -2.405904 | 2.706395  |
| P | -0.001673 | -0.527720 | -0.668623 |
| C | 1.569060  | -1.189405 | -0.039007 |
| C | 2.610641  | -1.338238 | -0.965460 |
| C | 1.773294  | -1.576396 | 1.289314  |
| C | 3.841897  | -1.846339 | -0.561314 |
| H | 2.456429  | -1.071145 | -2.006991 |
| C | 2.995235  | -2.109967 | 1.682182  |
| H | 0.998839  | -1.441954 | 2.033755  |
| H | 4.644862  | -1.947387 | -1.284698 |
| H | 3.139272  | -2.414660 | 2.713844  |
| C | 0.002719  | 1.069365  | 0.968292  |
| C | 1.190856  | 1.467227  | 1.576287  |
| C | -1.184149 | 1.470359  | 1.576783  |
| C | 1.141924  | 2.190017  | 2.767550  |
| H | 2.161767  | 1.225969  | 1.150158  |
| C | -1.132685 | 2.193083  | 2.768012  |
| H | -2.155944 | 1.231631  | 1.151304  |
| H | 2.061353  | 2.495160  | 3.262293  |
| H | -2.051084 | 2.500646  | 3.263170  |
| C | -4.050293 | -2.209316 | 0.756040  |
| H | -5.009870 | -2.609604 | 1.068263  |
| O | -0.003283 | -1.210287 | -2.176018 |
| C | 0.005290  | 1.164856  | -1.166473 |
| C | -1.210399 | 1.849147  | -1.515521 |
| C | 1.227731  | 1.837242  | -1.515144 |
| C | -1.169506 | 3.151981  | -1.897217 |
| H | -2.171544 | 1.356051  | -1.441645 |
| C | 1.199766  | 3.140414  | -1.896895 |
| H | 2.183887  | 1.334456  | -1.441571 |
| H | -2.060230 | 3.722717  | -2.130304 |
| H | 2.096103  | 3.702323  | -2.129935 |
| C | -0.010904 | -2.617035 | -2.426515 |
| H | -0.911511 | -3.083909 | -2.014701 |
| H | -0.001227 | -2.735537 | -3.510523 |
| H | 0.874558  | -3.097194 | -1.997399 |
| N | 0.005216  | 2.551480  | 3.365596  |
| N | 0.018383  | 3.801737  | -2.040249 |
| H | 0.023130  | 4.765483  | -2.345620 |
| C | 4.033363  | -2.238533 | 0.761044  |
| H | 4.989603  | -2.645904 | 1.074348  |

**[TS-II·2H]<sup>2+</sup>-PyH<sup>+</sup>,OMe,ax-a** (in gas phase)

|   |          |          |           |
|---|----------|----------|-----------|
| C | 3.965345 | 0.096175 | -1.292585 |
|---|----------|----------|-----------|

|   |           |           |           |
|---|-----------|-----------|-----------|
| C | 2.605846  | -0.136332 | -1.112509 |
| C | 1.760176  | 0.904347  | -0.700442 |
| C | 2.291281  | 2.181974  | -0.468422 |
| C | 3.652688  | 2.407035  | -0.645870 |
| H | 4.616987  | -0.706707 | -1.622741 |
| H | 2.200255  | -1.126517 | -1.310942 |
| H | 1.647249  | 2.999551  | -0.157062 |
| H | 4.061974  | 3.397031  | -0.471641 |
| P | -0.003773 | 0.546228  | -0.568189 |
| C | -0.747001 | 1.672194  | 0.622784  |
| C | -2.043842 | 2.155772  | 0.396294  |
| C | -0.104558 | 1.953742  | 1.840508  |
| C | -2.678381 | 2.929768  | 1.365105  |
| H | -2.544552 | 1.950109  | -0.545721 |
| C | -0.747947 | 2.721076  | 2.805153  |
| H | 0.909444  | 1.604075  | 2.021710  |
| H | -3.672548 | 3.322690  | 1.176526  |
| H | -0.240347 | 2.956543  | 3.735433  |
| C | -0.082172 | -2.167525 | 0.626107  |
| C | 0.091417  | -1.640842 | 1.919805  |
| C | 0.703951  | -3.272279 | 0.262602  |
| C | 1.019095  | -2.189068 | 2.773067  |
| H | -0.480251 | -0.786802 | 2.266527  |
| C | 1.623457  | -3.792201 | 1.148738  |
| H | 0.591226  | -3.760851 | -0.697279 |
| H | 1.195940  | -1.822947 | 3.777359  |
| H | 2.248639  | -4.648271 | 0.923251  |
| C | 4.487386  | 1.367472  | -1.055902 |
| H | 5.547915  | 1.550828  | -1.197371 |
| O | -0.716493 | 0.819143  | -1.994052 |
| C | -1.114727 | -1.610351 | -0.305858 |
| C | -1.181525 | -2.076472 | -1.666377 |
| C | -2.383946 | -1.228289 | 0.264803  |
| C | -2.327098 | -1.964414 | -2.390064 |
| H | -0.297358 | -2.438919 | -2.177568 |
| C | -3.500733 | -1.145851 | -0.509903 |
| H | -2.477044 | -0.981538 | 1.315220  |
| H | -2.392060 | -2.260052 | -3.430093 |
| H | -4.462458 | -0.843609 | -0.112638 |
| C | -0.445866 | 2.011444  | -2.763862 |
| H | 0.602608  | 2.027952  | -3.070917 |
| H | -1.090626 | 1.954613  | -3.639939 |
| H | -0.684387 | 2.904886  | -2.179511 |
| N | 1.760947  | -3.242333 | 2.369308  |
| N | -3.465565 | -1.484234 | -1.823692 |
| C | -2.034611 | 3.208835  | 2.568623  |
| H | -2.529021 | 3.816813  | 3.319650  |
| H | -4.315765 | -1.442807 | -2.372465 |
| H | 2.435650  | -3.643931 | 3.015385  |

**[TS-II·H]<sup>+</sup>-Py,OMe,ax-a** (in gas phase)

|   |          |           |           |
|---|----------|-----------|-----------|
| C | 3.932411 | -1.211160 | 1.306256  |
| C | 2.640801 | -1.266481 | 0.794197  |
| C | 2.140731 | -0.209122 | 0.019838  |
| C | 2.949766 | 0.904199  | -0.234931 |
| C | 4.239838 | 0.958556  | 0.286558  |

|   |           |           |           |
|---|-----------|-----------|-----------|
| H | 4.316265  | -2.033669 | 1.901762  |
| H | 2.022298  | -2.140337 | 0.989158  |
| H | 2.579022  | 1.726334  | -0.839846 |
| H | 4.864318  | 1.823863  | 0.087194  |
| P | 0.452954  | -0.391801 | -0.616605 |
| C | -0.094103 | 1.208592  | -1.252881 |
| C | -0.714799 | 1.293964  | -2.505483 |
| C | -0.071112 | 2.333367  | -0.414476 |
| C | -1.273060 | 2.498614  | -2.927001 |
| H | -0.759518 | 0.421982  | -3.152242 |
| C | -0.632152 | 3.532017  | -0.840329 |
| H | 0.382161  | 2.276988  | 0.572388  |
| H | -1.740386 | 2.562941  | -3.904938 |
| H | -0.605072 | 4.398880  | -0.187386 |
| C | -1.490996 | -0.108417 | 1.543691  |
| C | -2.531004 | 0.817638  | 1.523245  |
| C | -0.473398 | 0.088271  | 2.483341  |
| C | -2.492360 | 1.896564  | 2.407512  |
| H | -3.372875 | 0.720842  | 0.846894  |
| C | -0.530792 | 1.194653  | 3.321411  |
| H | 0.378098  | -0.582666 | 2.550198  |
| H | -3.290357 | 2.634513  | 2.398542  |
| H | 0.255365  | 1.369282  | 4.051332  |
| C | 4.730112  | -0.094867 | 1.055763  |
| H | 5.736669  | -0.047511 | 1.459859  |
| O | 0.527230  | -1.402506 | -1.891890 |
| C | -1.453932 | -1.266834 | 0.590737  |
| C | -1.085842 | -2.563986 | 1.111712  |
| C | -2.377194 | -1.311136 | -0.518653 |
| C | -1.407741 | -3.702837 | 0.448497  |
| H | -0.539637 | -2.640462 | 2.044398  |
| C | -2.653484 | -2.481043 | -1.150221 |
| H | -2.799427 | -0.396331 | -0.917209 |
| H | -1.131292 | -4.688024 | 0.804438  |
| H | -3.297805 | -2.538546 | -2.019157 |
| C | 1.577407  | -1.298257 | -2.867531 |
| H | 2.535517  | -1.576535 | -2.419963 |
| H | 1.321774  | -1.996356 | -3.664980 |
| H | 1.638499  | -0.281400 | -3.268429 |
| N | -1.514154 | 2.099772  | 3.287140  |
| N | -2.148046 | -3.660534 | -0.695965 |
| C | -1.230580 | 3.617016  | -2.097238 |
| H | -1.665865 | 4.554972  | -2.428058 |
| H | -2.395598 | -4.522237 | -1.162093 |

**[TS-I]-Py,OMe,ax-a** (in gas phase)

|   |           |           |           |
|---|-----------|-----------|-----------|
| C | -4.172155 | 0.481785  | -0.359814 |
| C | -2.872821 | 0.340384  | -0.836408 |
| C | -1.916512 | -0.349044 | -0.079374 |
| C | -2.288745 | -0.934044 | 1.132452  |
| C | -3.591834 | -0.797760 | 1.601262  |
| H | -4.903447 | 1.028621  | -0.947084 |
| H | -2.605950 | 0.758296  | -1.802905 |
| H | -1.572512 | -1.494868 | 1.720205  |
| H | -3.870545 | -1.249934 | 2.548112  |
| P | -0.263886 | -0.490397 | -0.801466 |

|   |           |           |           |
|---|-----------|-----------|-----------|
| C | 0.789864  | -1.751282 | -0.025685 |
| C | 1.480530  | -2.608257 | -0.893248 |
| C | 0.965953  | -1.893123 | 1.356346  |
| C | 2.323540  | -3.593351 | -0.387094 |
| H | 1.372229  | -2.494558 | -1.967221 |
| C | 1.798647  | -2.887611 | 1.857390  |
| H | 0.493341  | -1.204841 | 2.046731  |
| H | 2.862252  | -4.241620 | -1.071439 |
| H | 1.928974  | -2.982956 | 2.930982  |
| C | 0.594478  | 1.164094  | 0.864544  |
| C | 1.863827  | 1.131483  | 1.433554  |
| C | -0.394257 | 1.830254  | 1.588454  |
| C | 2.076059  | 1.696253  | 2.687702  |
| H | 2.699143  | 0.683839  | 0.897181  |
| C | -0.088837 | 2.368705  | 2.836857  |
| H | -1.403950 | 1.949288  | 1.200540  |
| H | 3.063976  | 1.667622  | 3.144417  |
| H | -0.856769 | 2.878388  | 3.416755  |
| C | -4.530891 | -0.080966 | 0.863340  |
| H | -5.544451 | 0.031232  | 1.236782  |
| O | -0.583427 | -1.131284 | -2.270101 |
| C | 0.576816  | 1.038385  | -1.083015 |
| C | -0.109952 | 2.225398  | -1.552005 |
| C | 1.934479  | 0.937519  | -1.582071 |
| C | 0.636690  | 3.268164  | -2.052838 |
| H | -1.171415 | 2.366261  | -1.383693 |
| C | 2.546324  | 2.065337  | -2.086553 |
| H | 2.498091  | 0.013758  | -1.493355 |
| H | 0.123810  | 4.196164  | -2.304164 |
| H | 3.595707  | 2.001441  | -2.374356 |
| C | -1.415213 | -2.274712 | -2.457739 |
| H | -1.100769 | -3.107357 | -1.818004 |
| H | -2.460468 | -2.028465 | -2.245809 |
| H | -1.310106 | -2.559459 | -3.505582 |
| N | 1.120488  | 2.301558  | 3.401358  |
| N | 1.957935  | 3.251713  | -2.303900 |
| C | 2.478110  | -3.739155 | 0.988647  |
| H | 3.135002  | -4.508253 | 1.384279  |



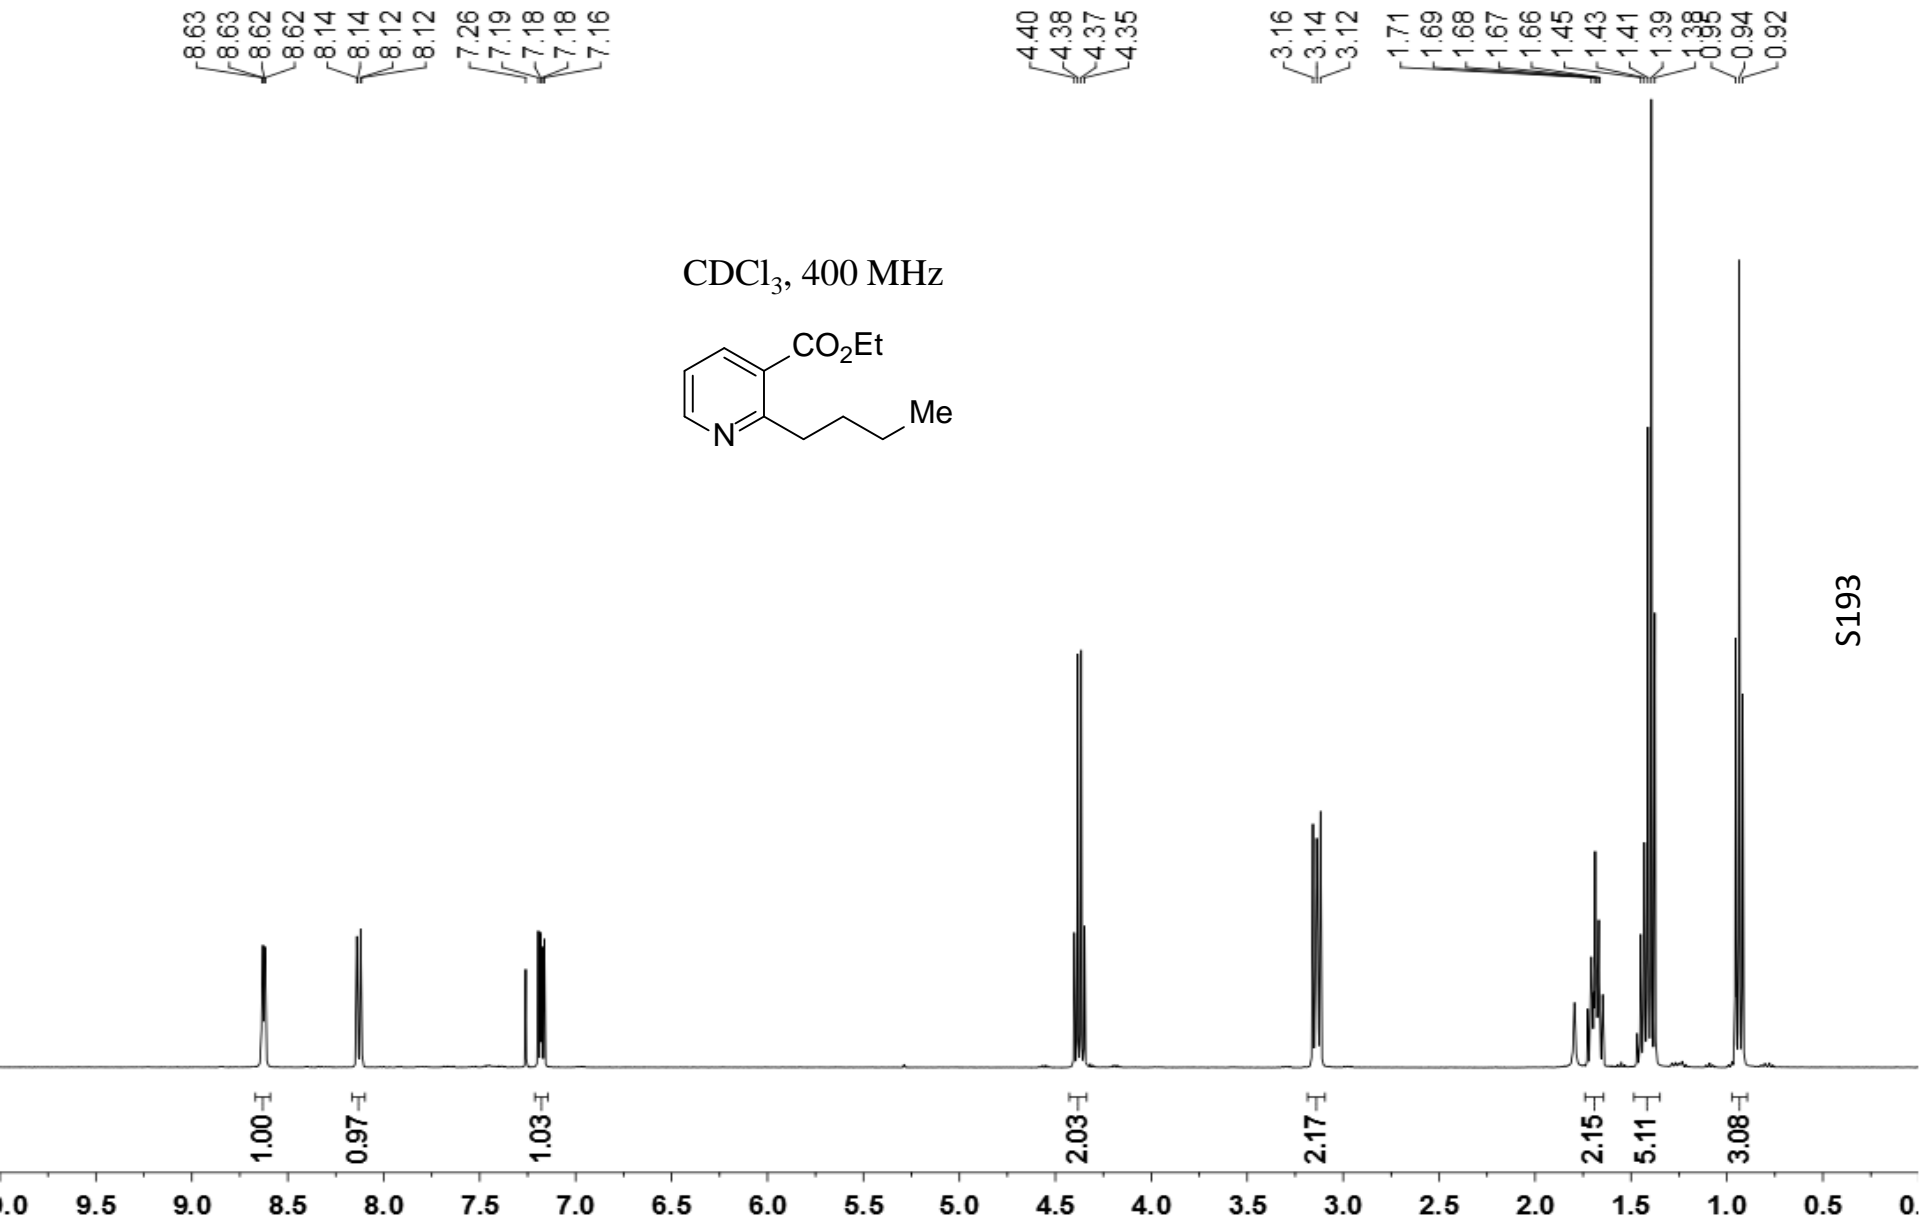

CDCl<sub>3</sub>, 100 MHz

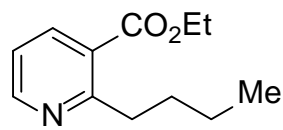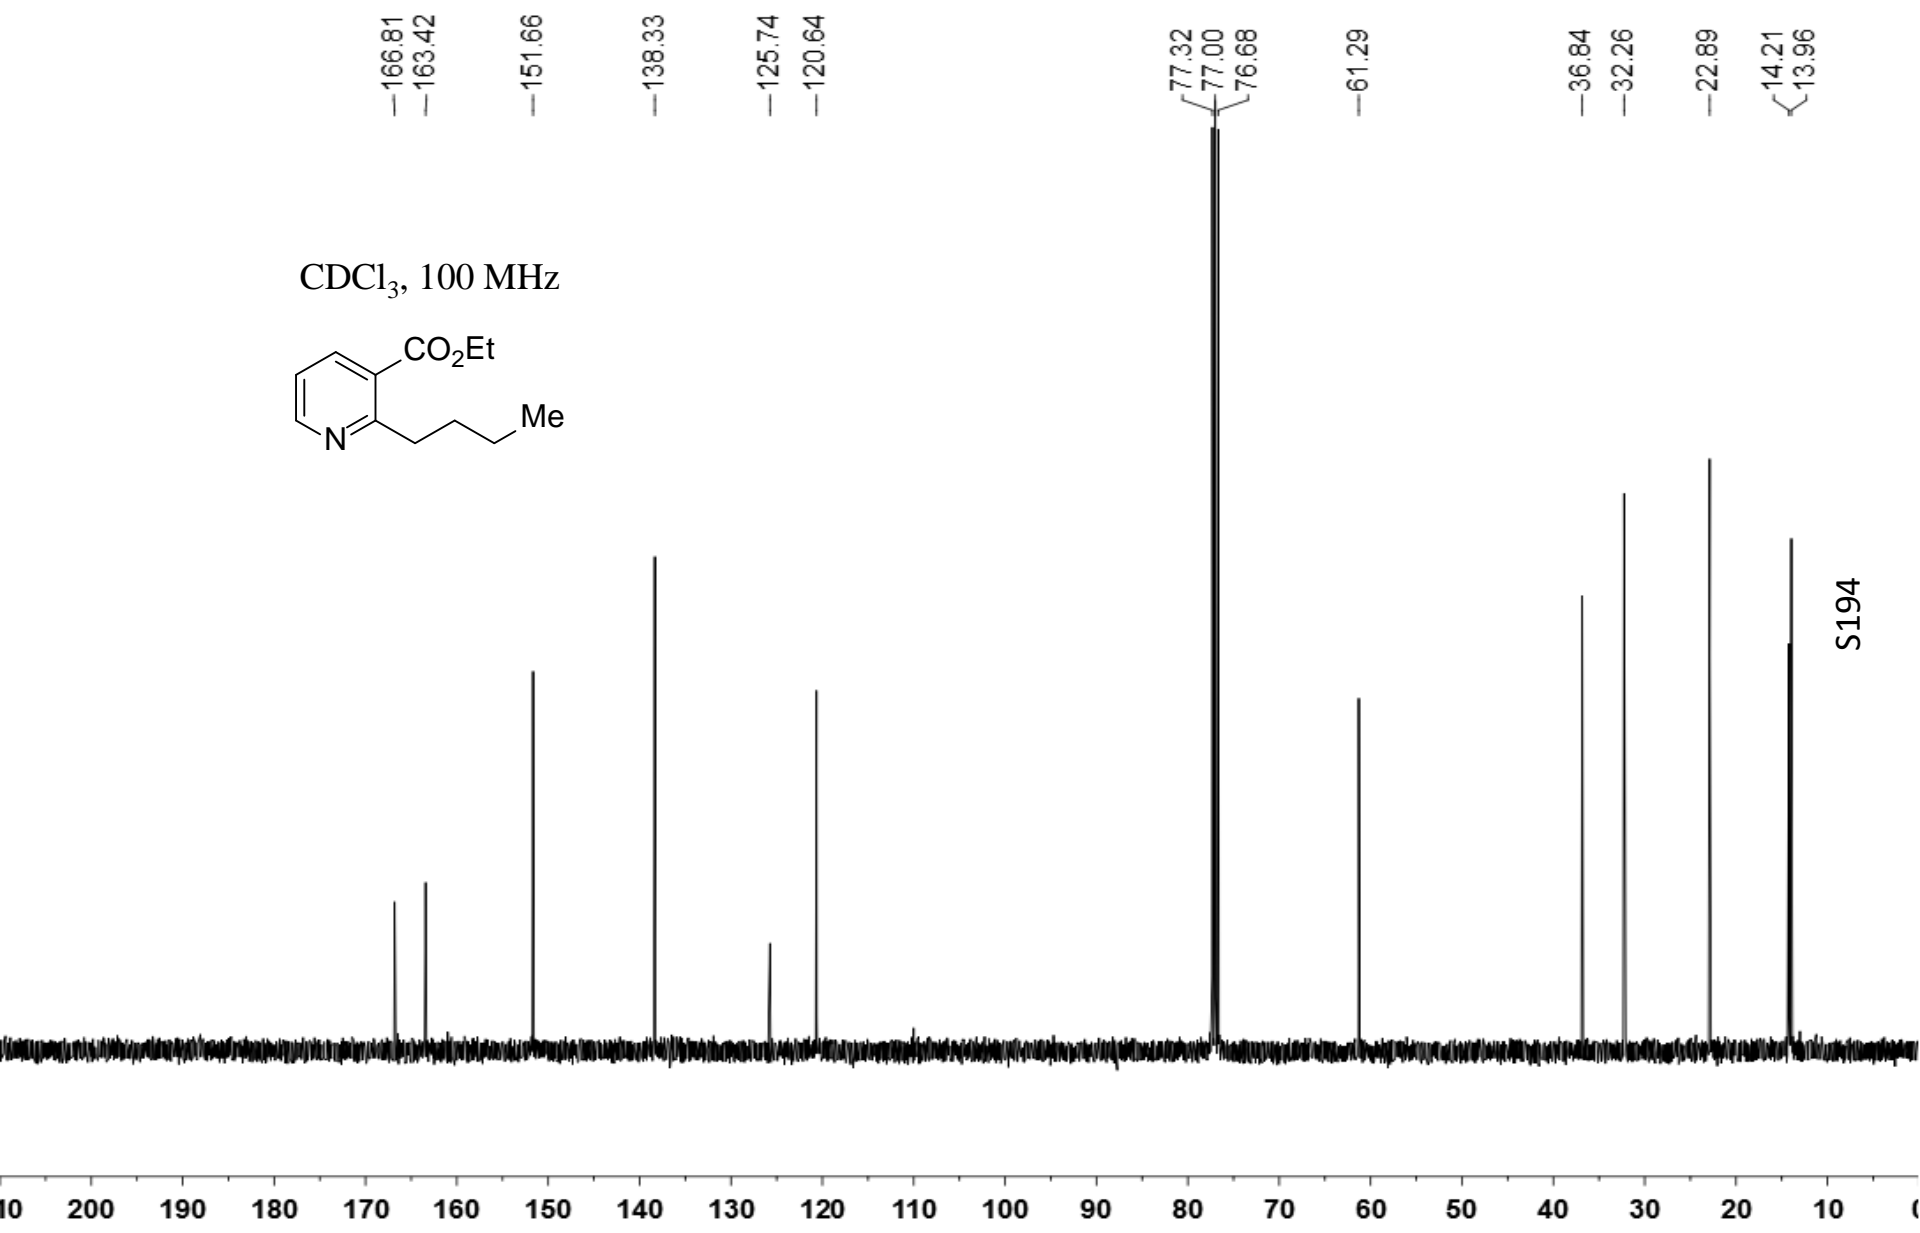

S194

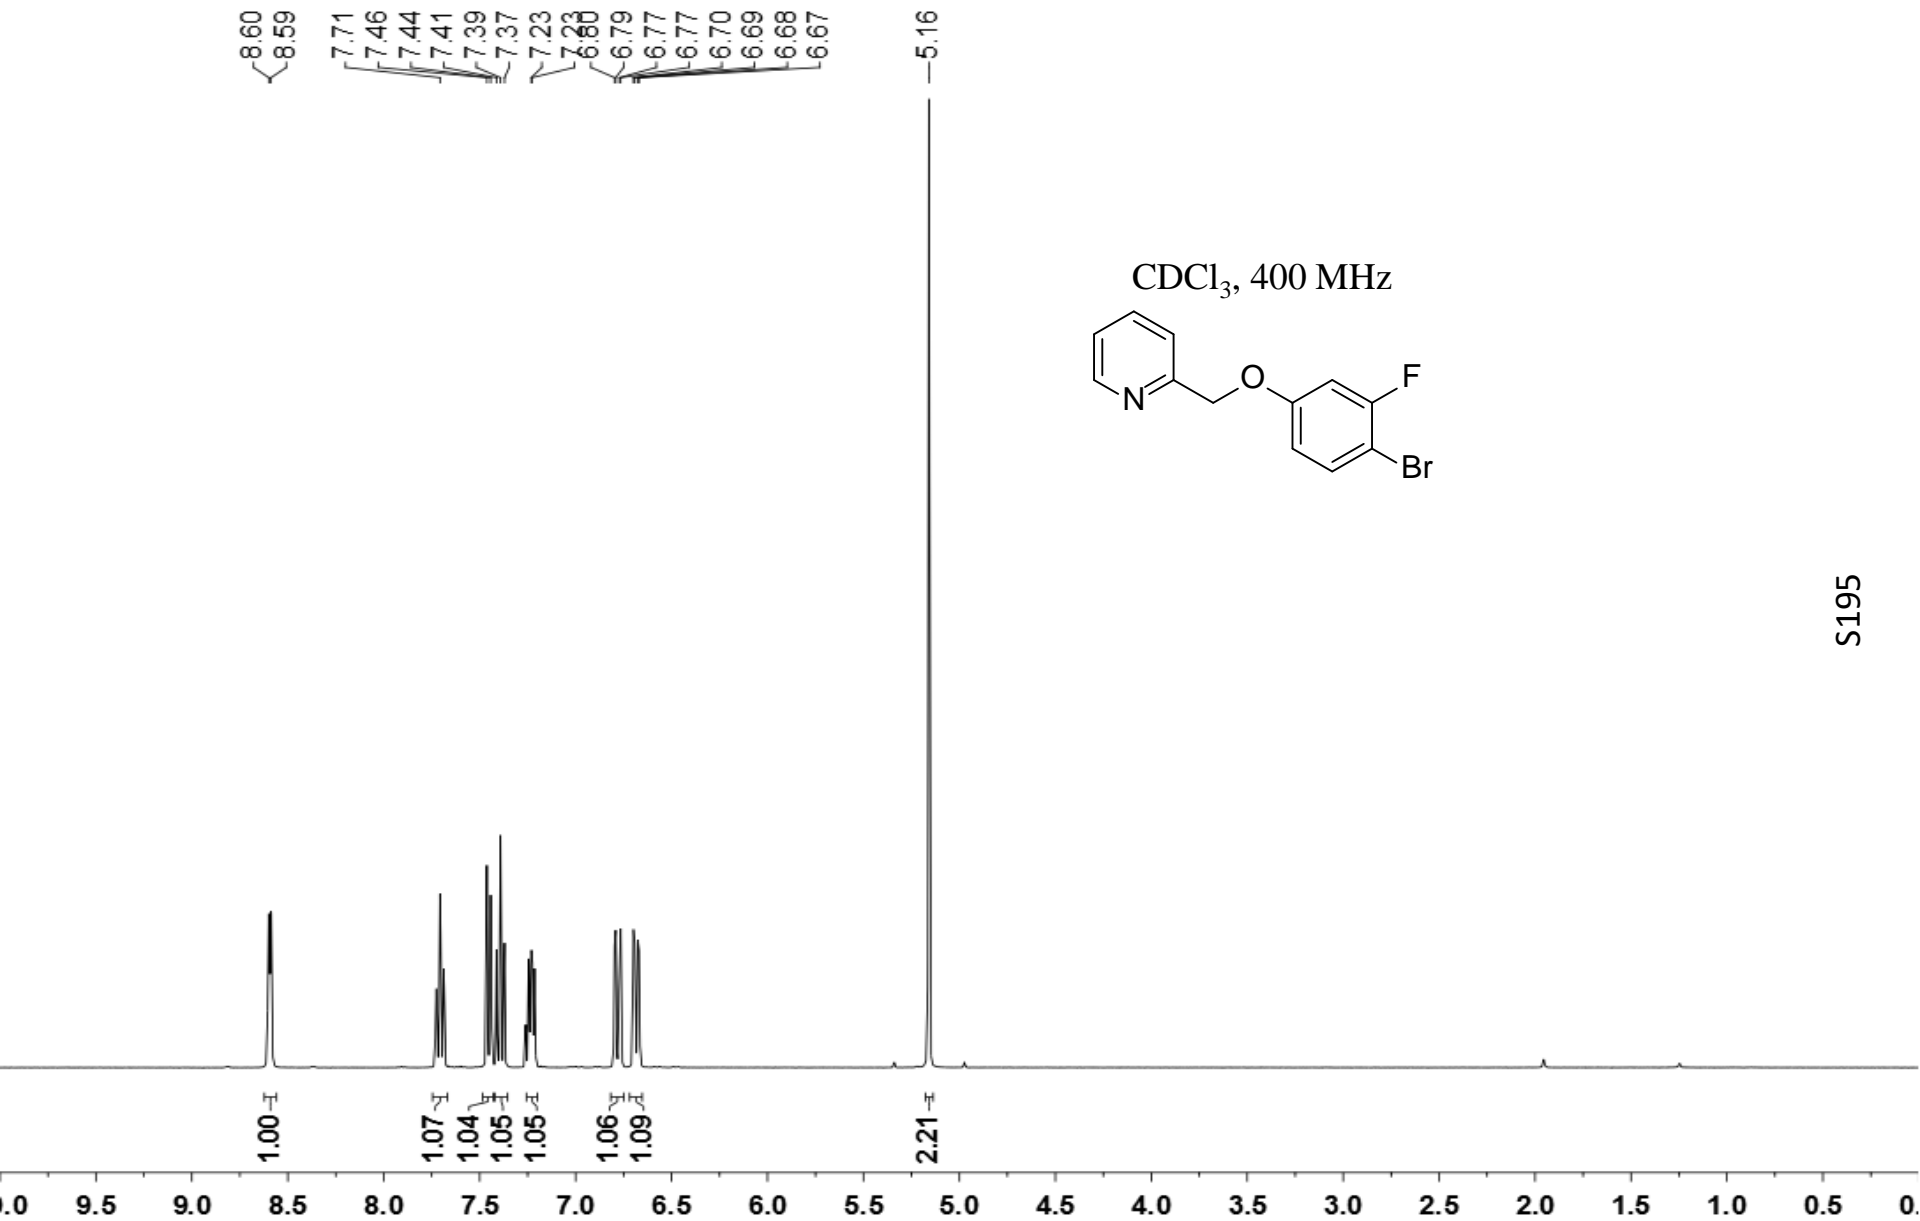

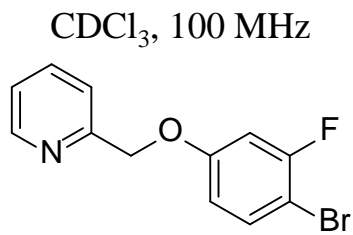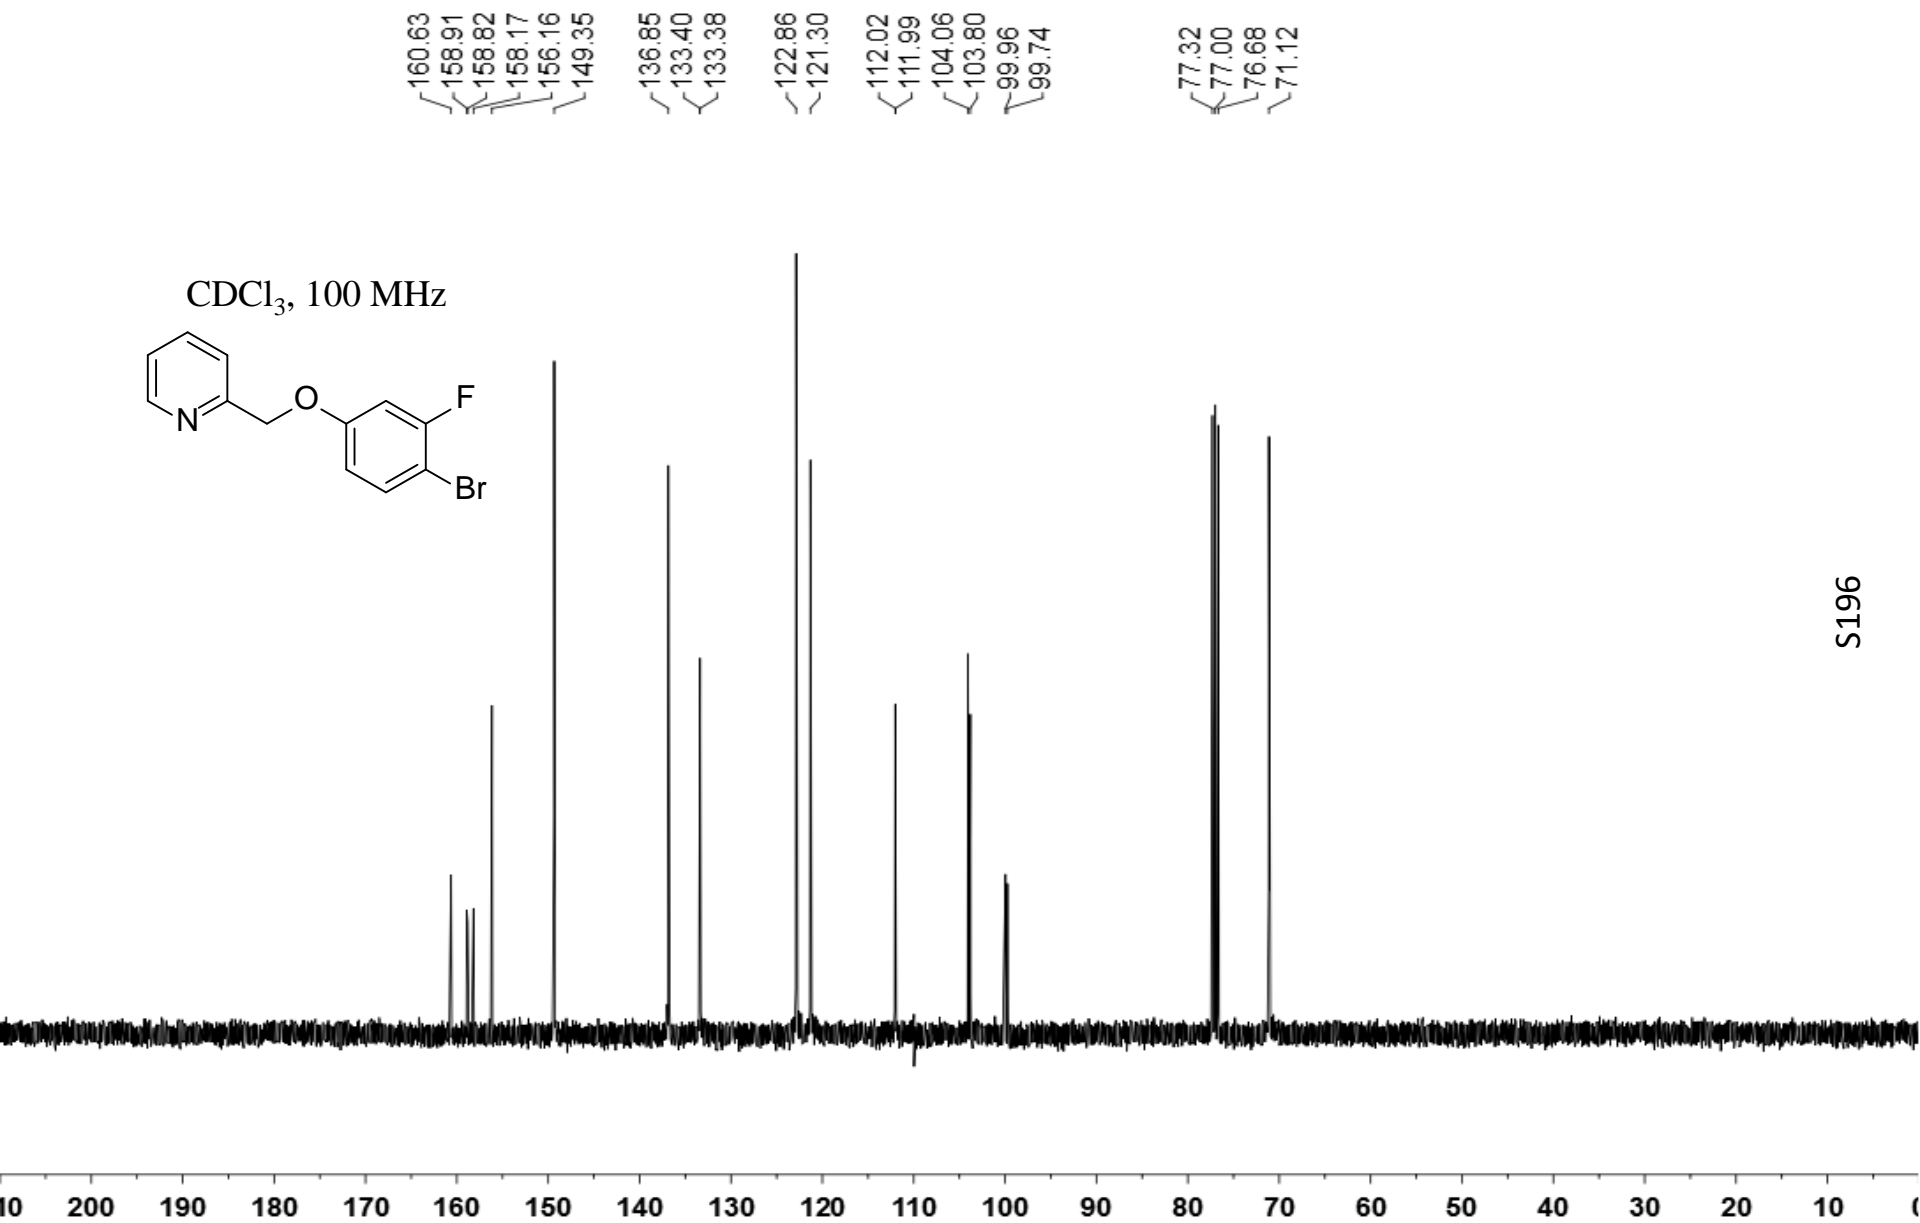

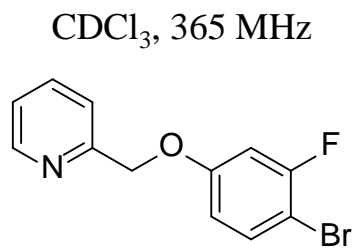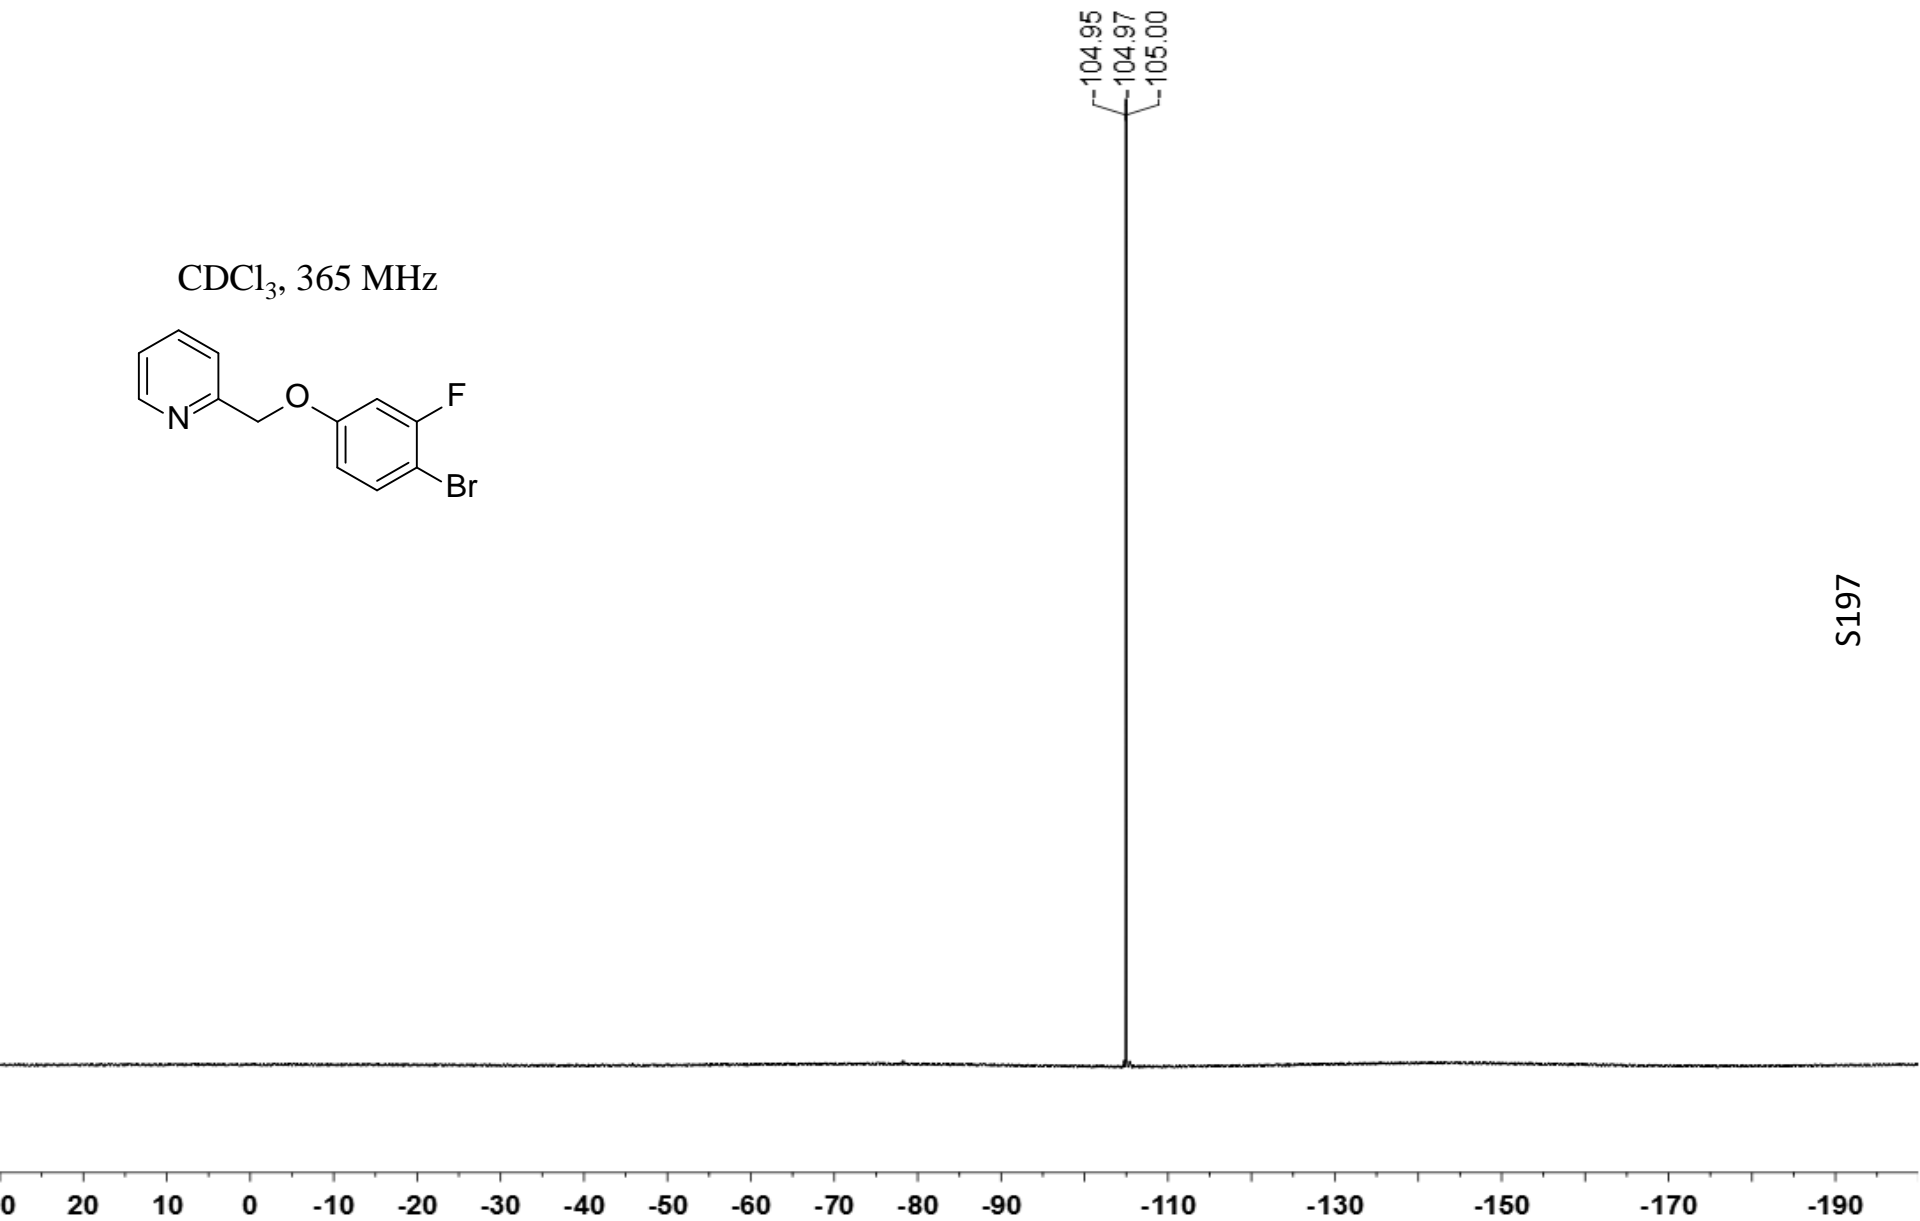

8.70  
8.27  
8.25  
8.10  
8.10  
7.55  
7.55  
7.53  
7.52  
7.47  
7.45  
7.45  
7.43  
7.43  
7.41  
7.05  
7.04  
7.03  
7.02  
7.01  
7.00  
6.99  
6.98  
6.97  
6.95  
6.94  
6.93  
6.92  
6.92  
6.91  
6.61  
6.60

CDCl<sub>3</sub>, 400 MHz

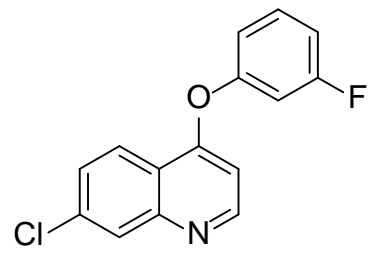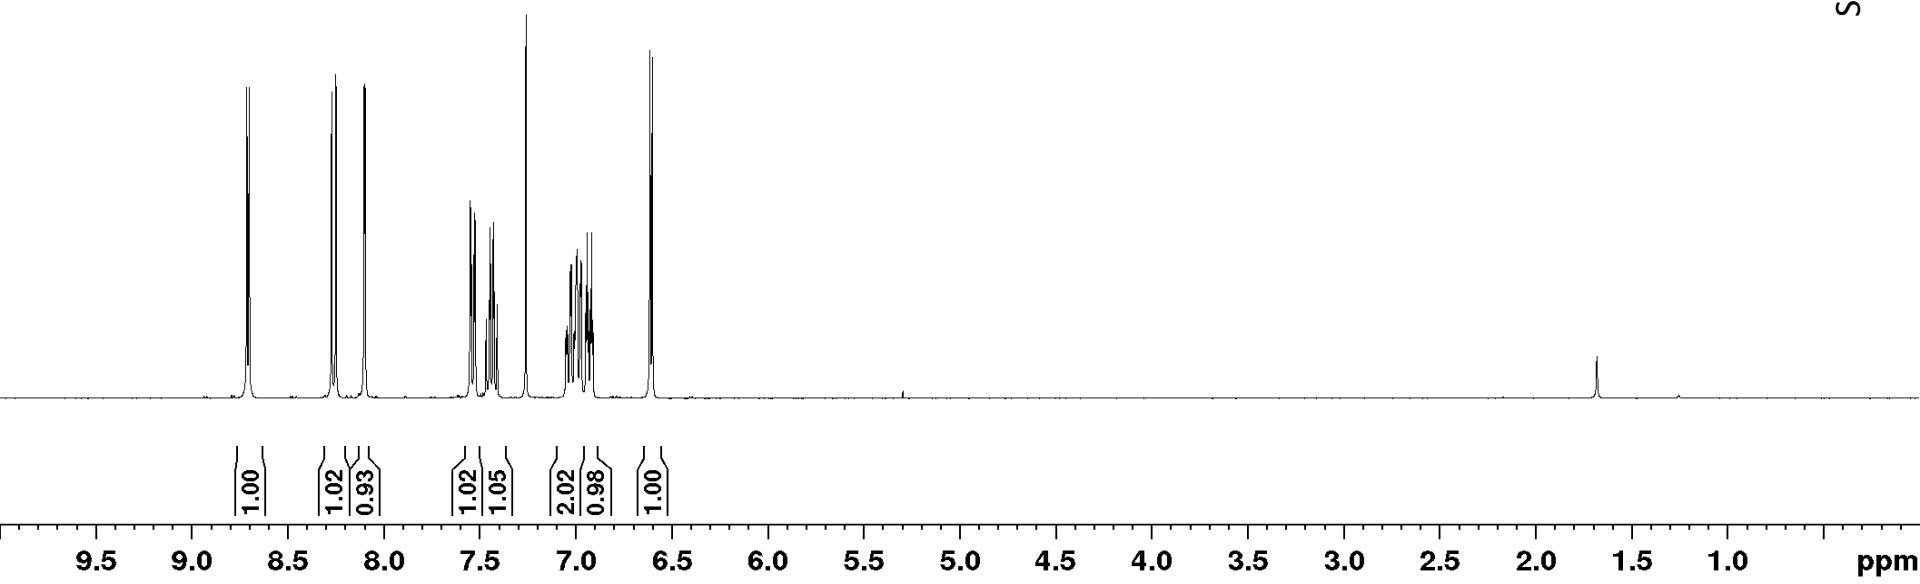

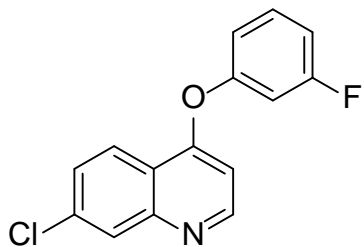

CDCl<sub>3</sub>, 100 MHz

164.79  
162.32  
161.20  
155.27  
155.17  
152.26  
150.33  
136.30  
131.23  
131.14  
128.19  
127.32  
123.20  
119.79  
116.56  
116.53  
112.94  
112.73  
108.99  
108.76  
104.81

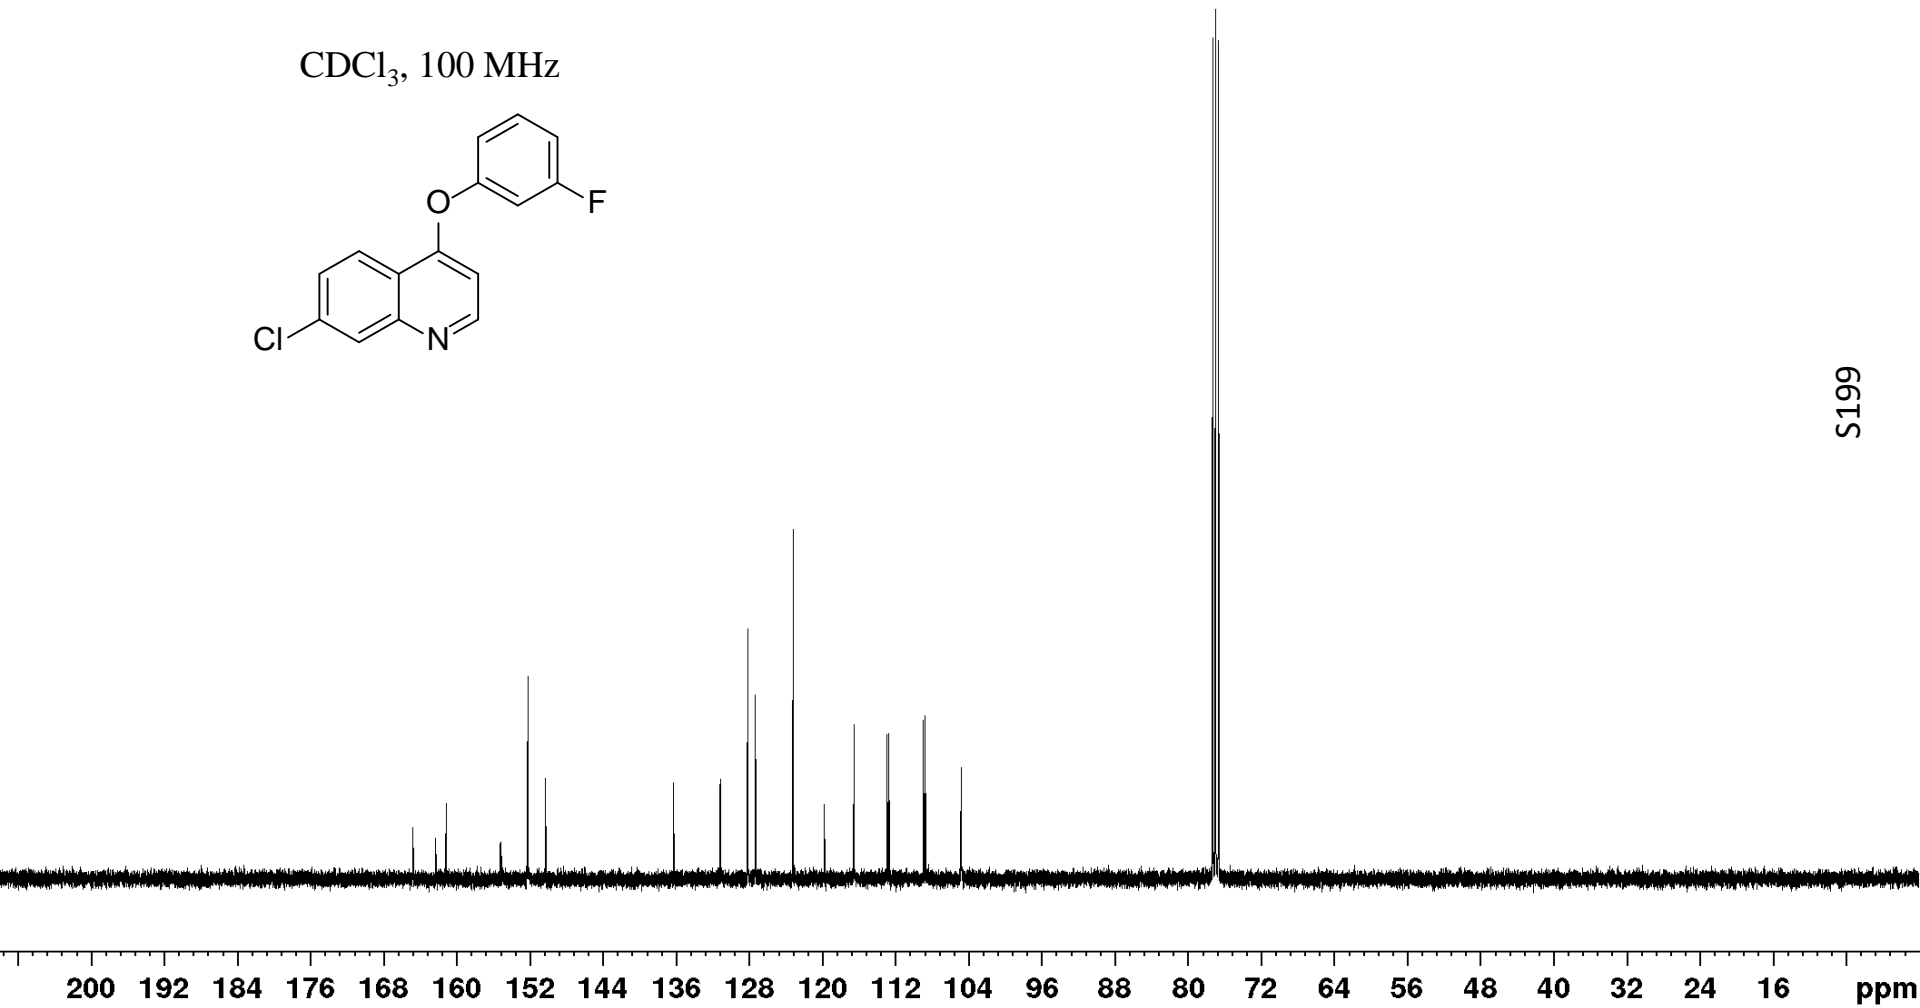

CDCl<sub>3</sub>, 365 MHz

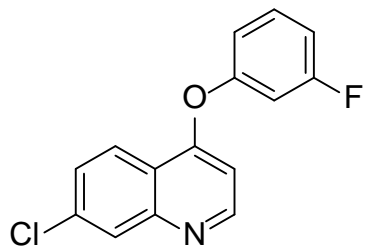

-109.40  
-109.42  
-109.44  
-109.46

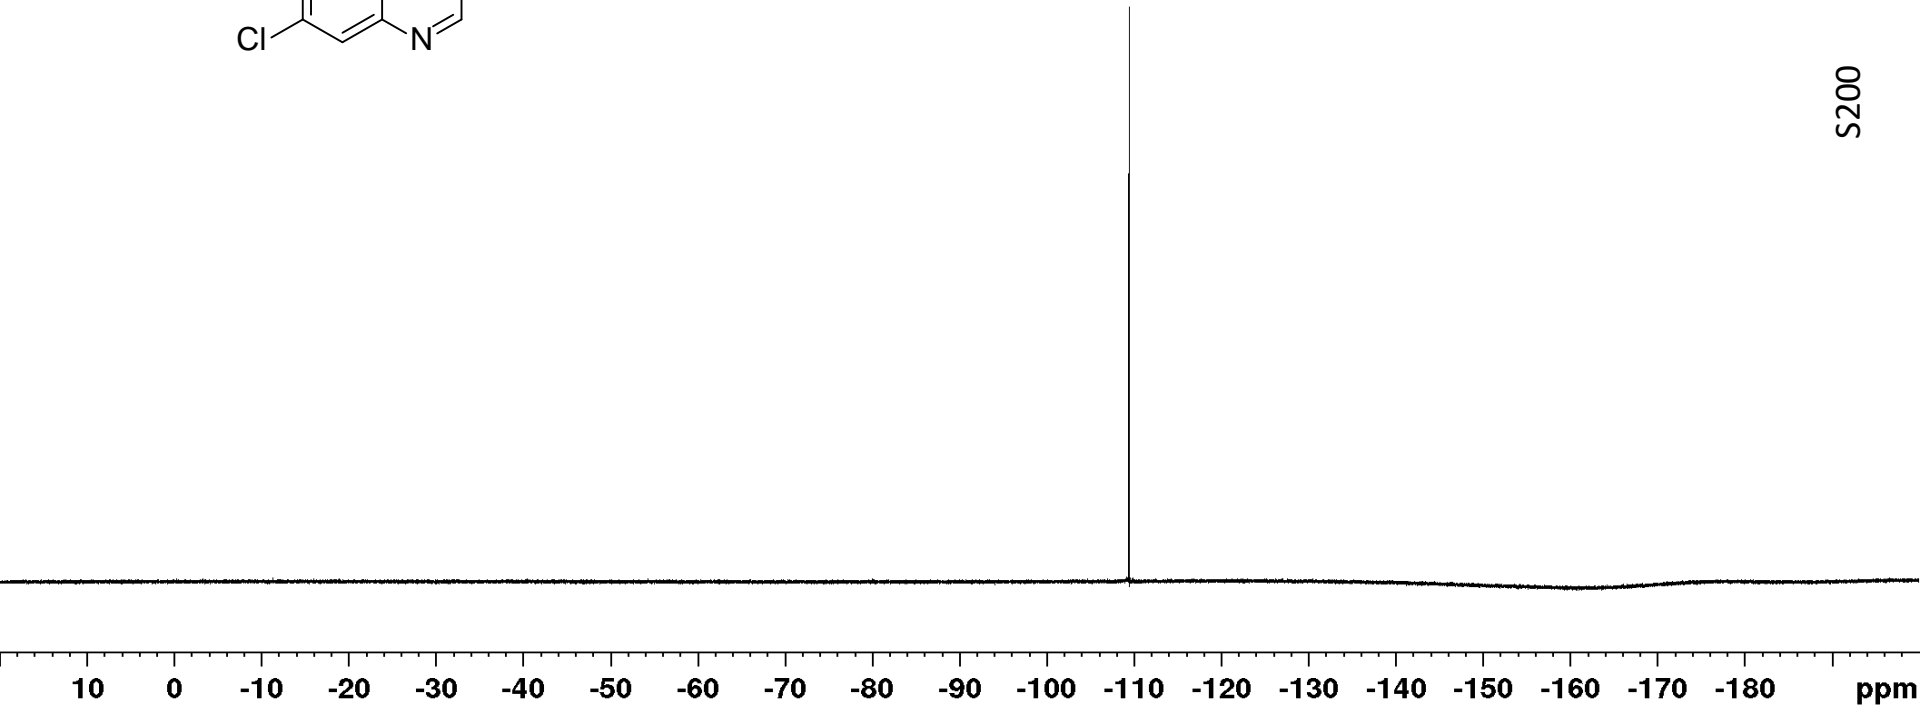

S200



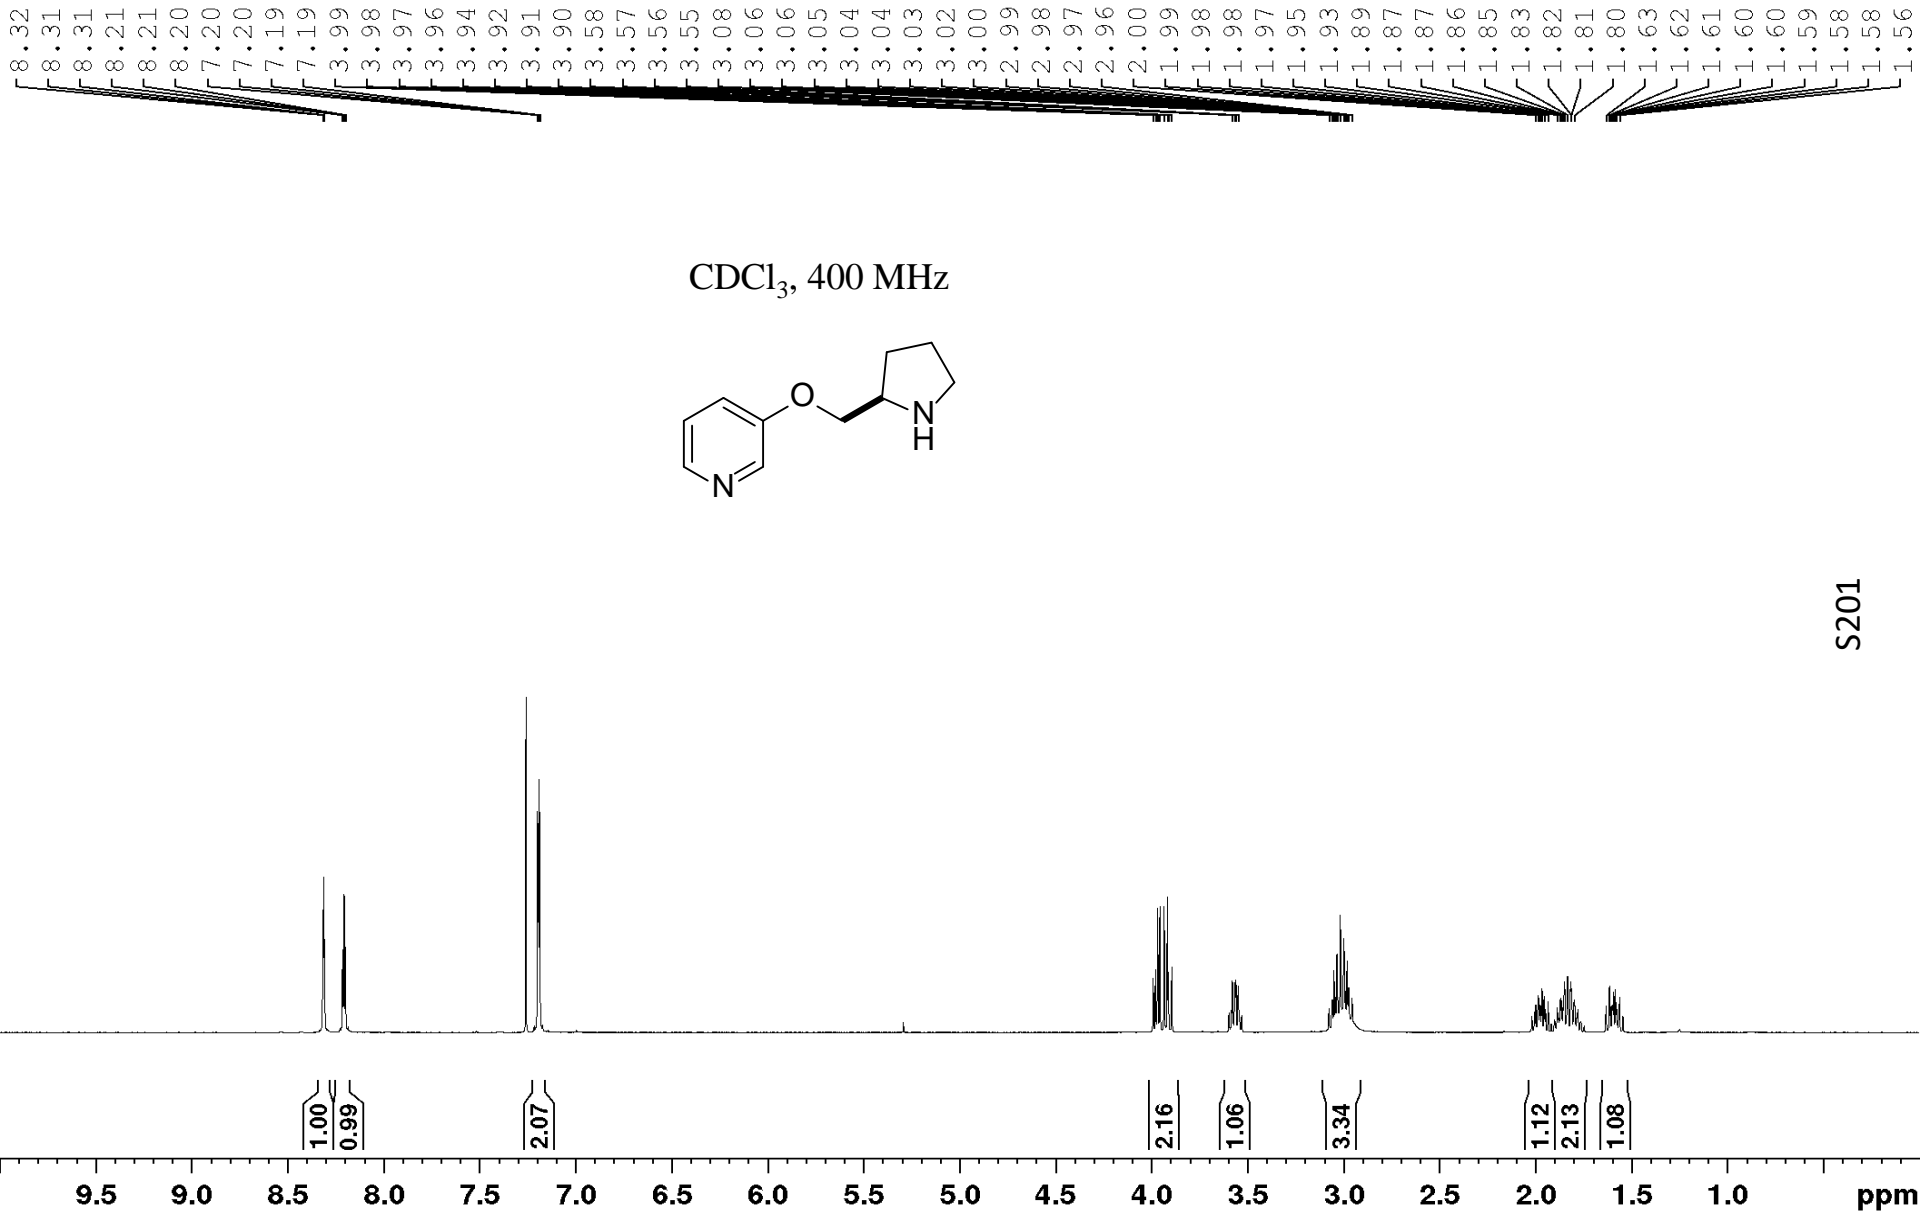

CDCl<sub>3</sub>, 100 MHz

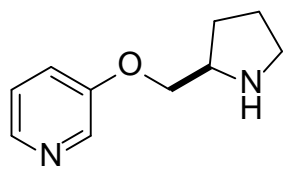

— 154.85

— 142.23

— 138.01

— 123.74

— 121.07

— 70.73

— 57.26

— 46.31

— 27.71

— 24.98

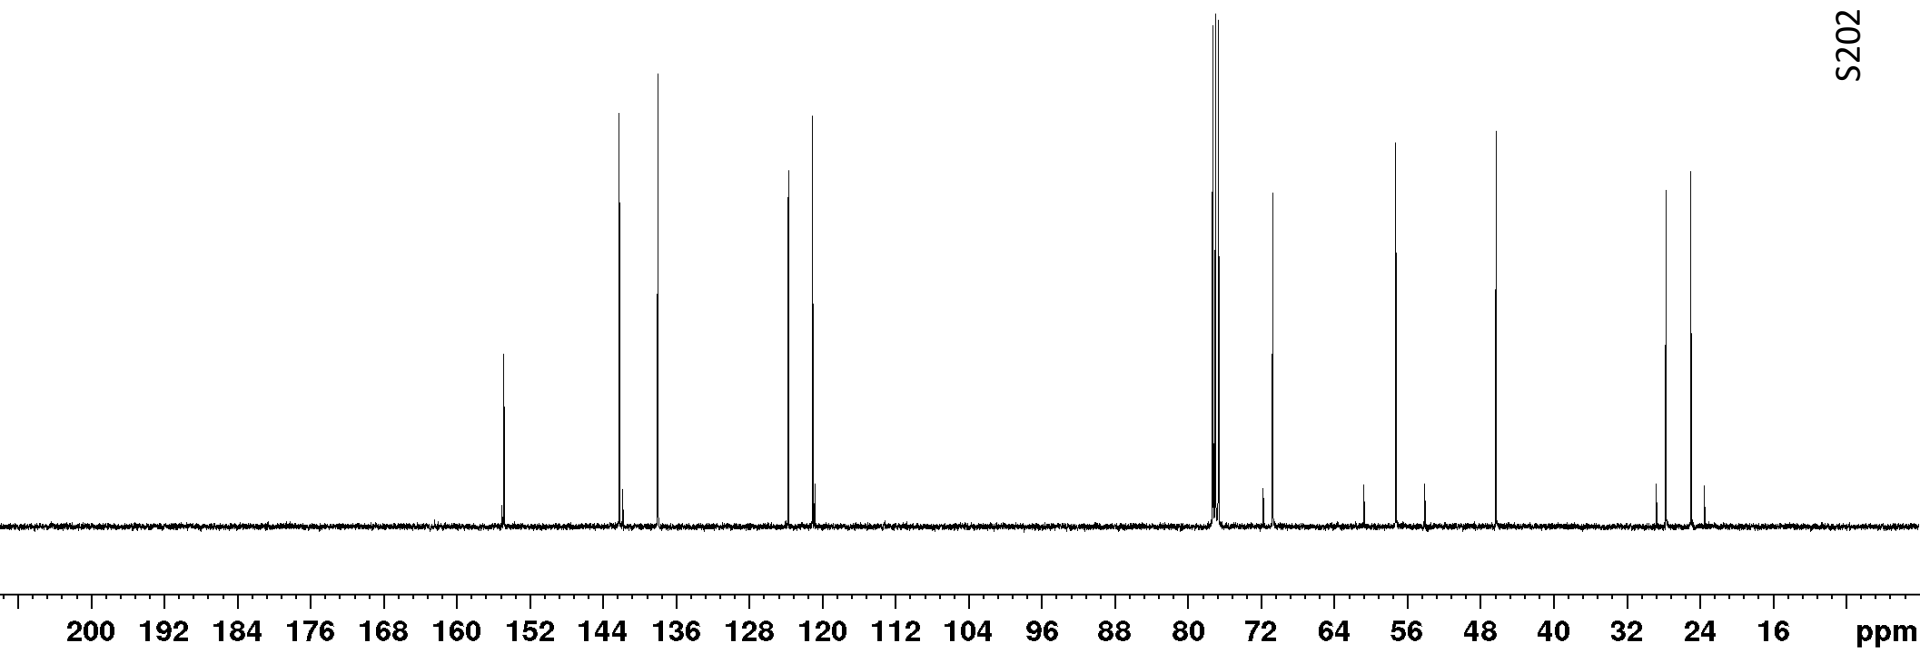

S202

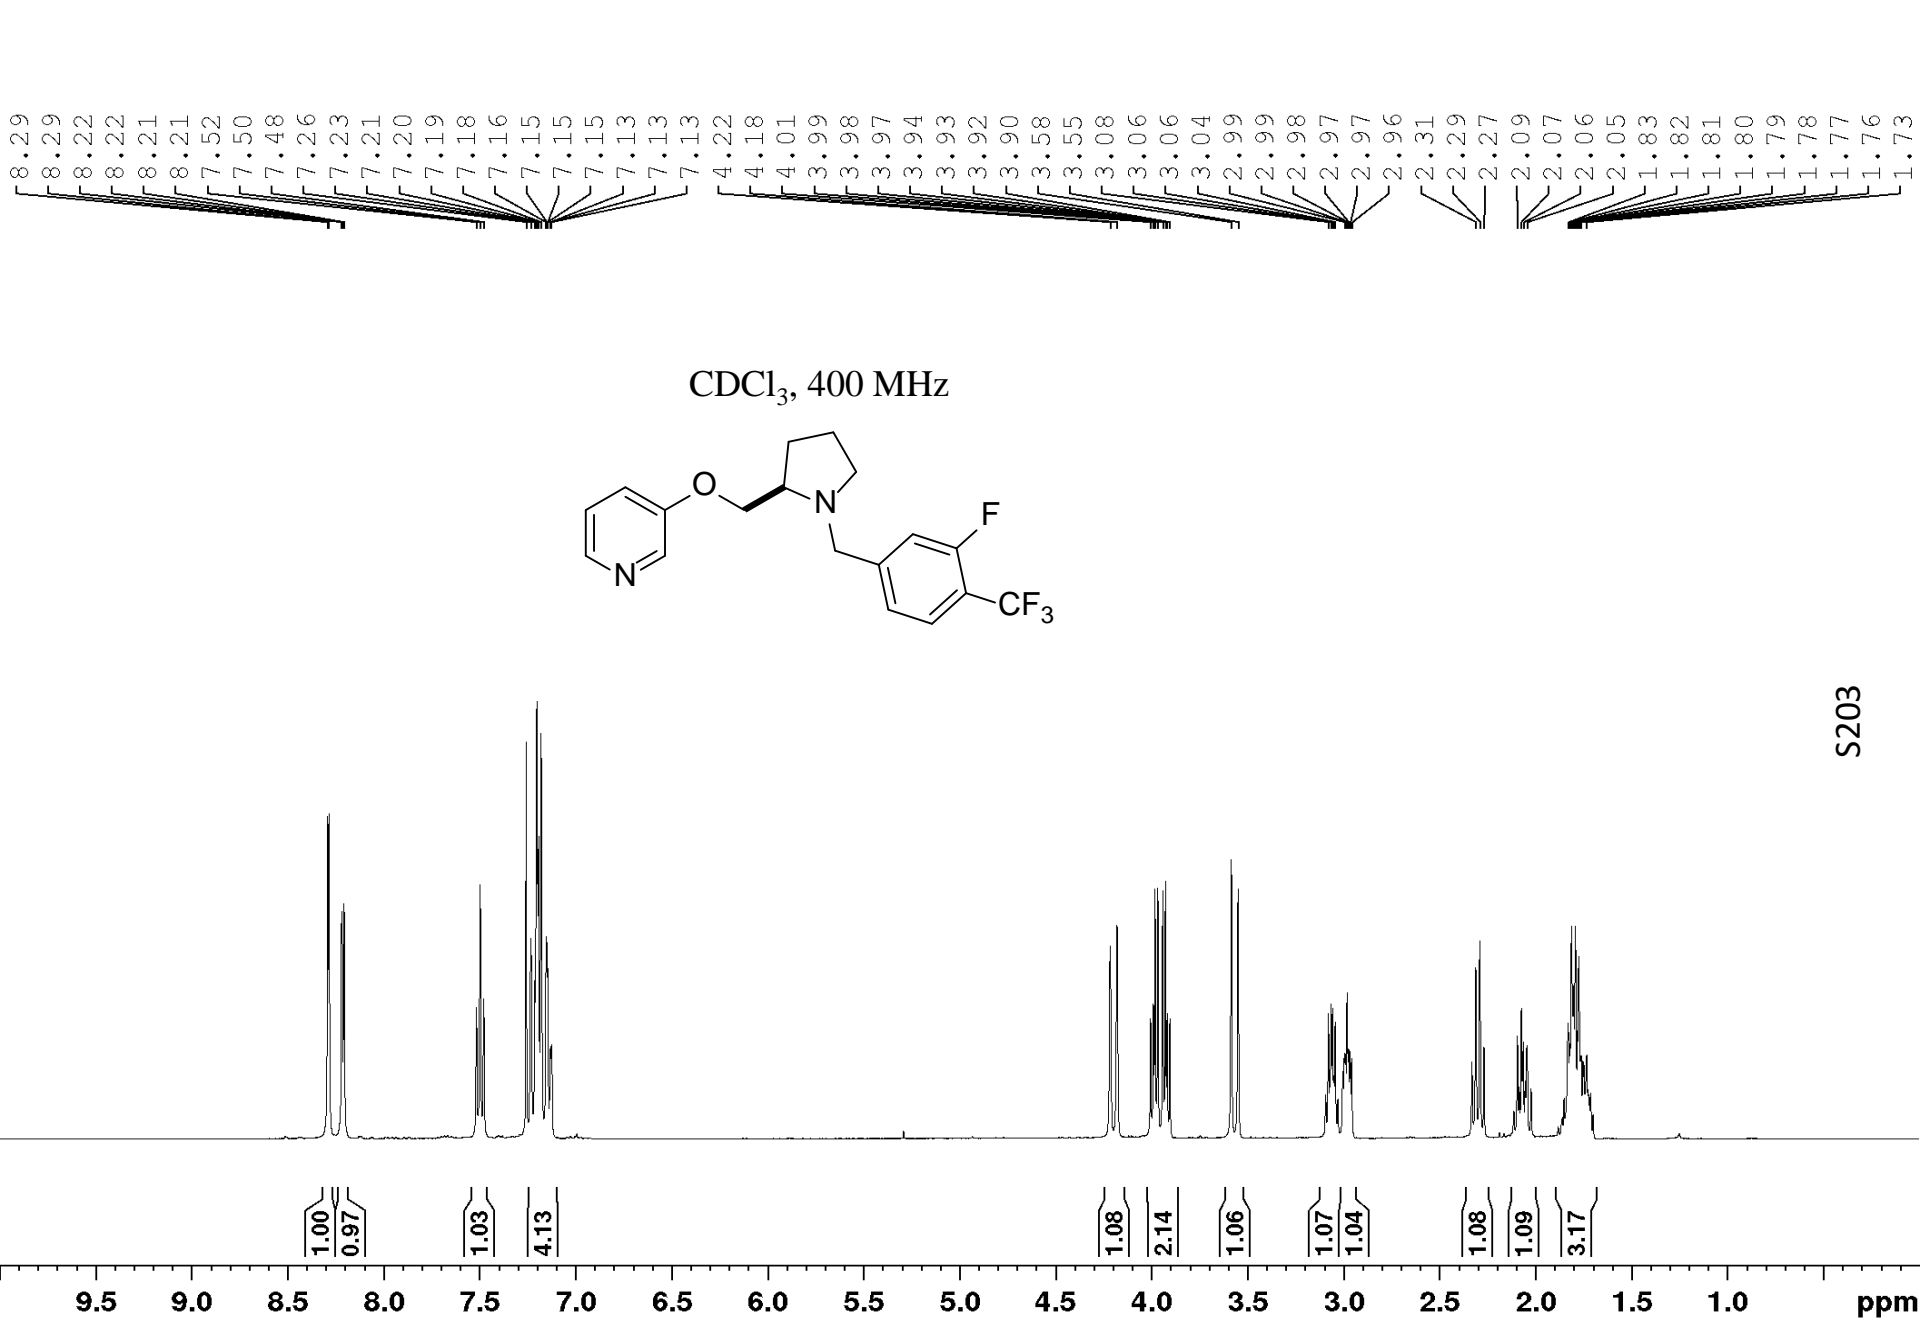

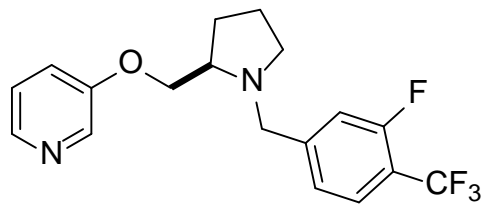

161.09  
158.57  
155.02  
147.55  
147.48  
142.22  
137.98  
126.90  
126.83  
124.04  
123.80  
123.69  
123.66  
121.34  
120.96  
116.94  
116.63  
116.43

77.32  
77.20  
77.00  
76.68  
71.92  
62.52  
58.94  
54.81

28.51  
23.24

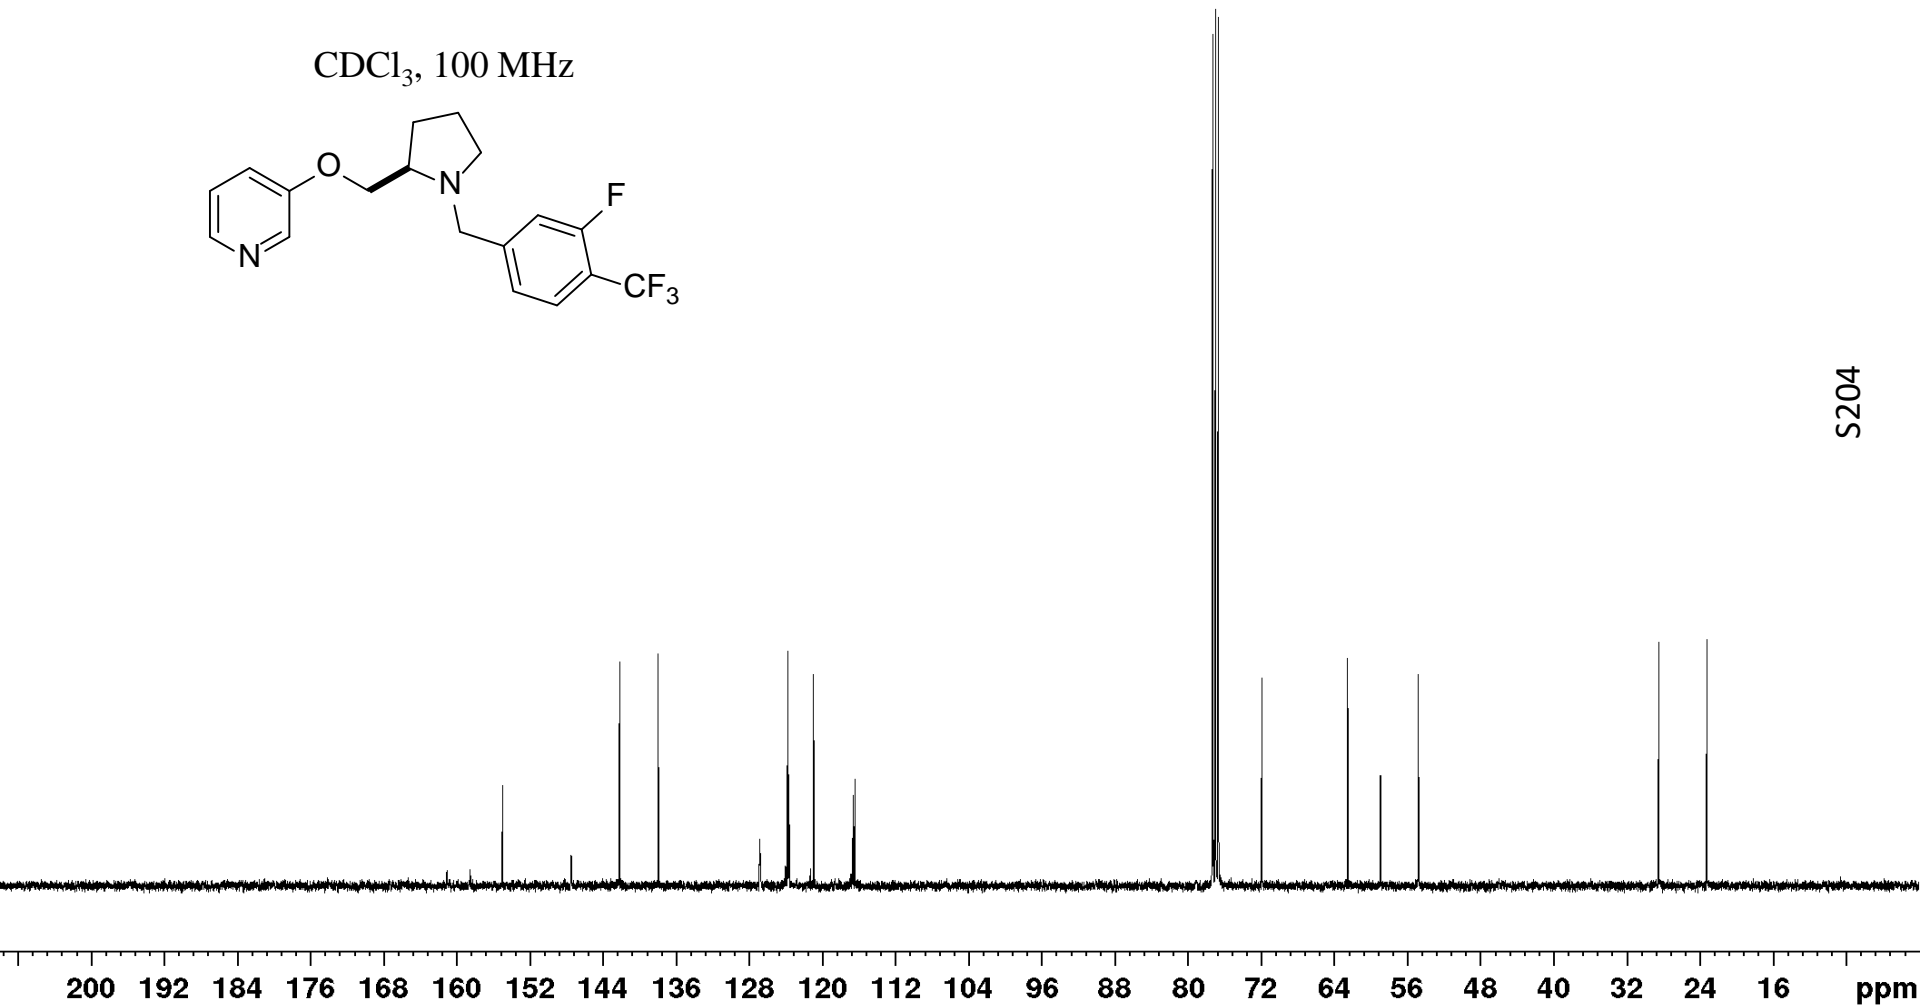

S204

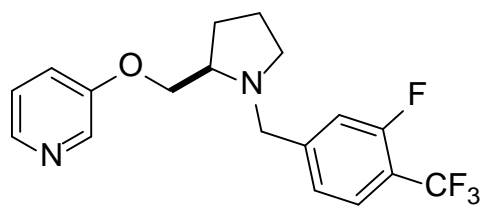

CDCl<sub>3</sub>, 365 MHz

-61.13  
-61.17

-114.97  
-114.99  
-115.01  
-115.03  
-115.04  
-115.06  
-115.07  
-115.09  
-115.11  
-115.13

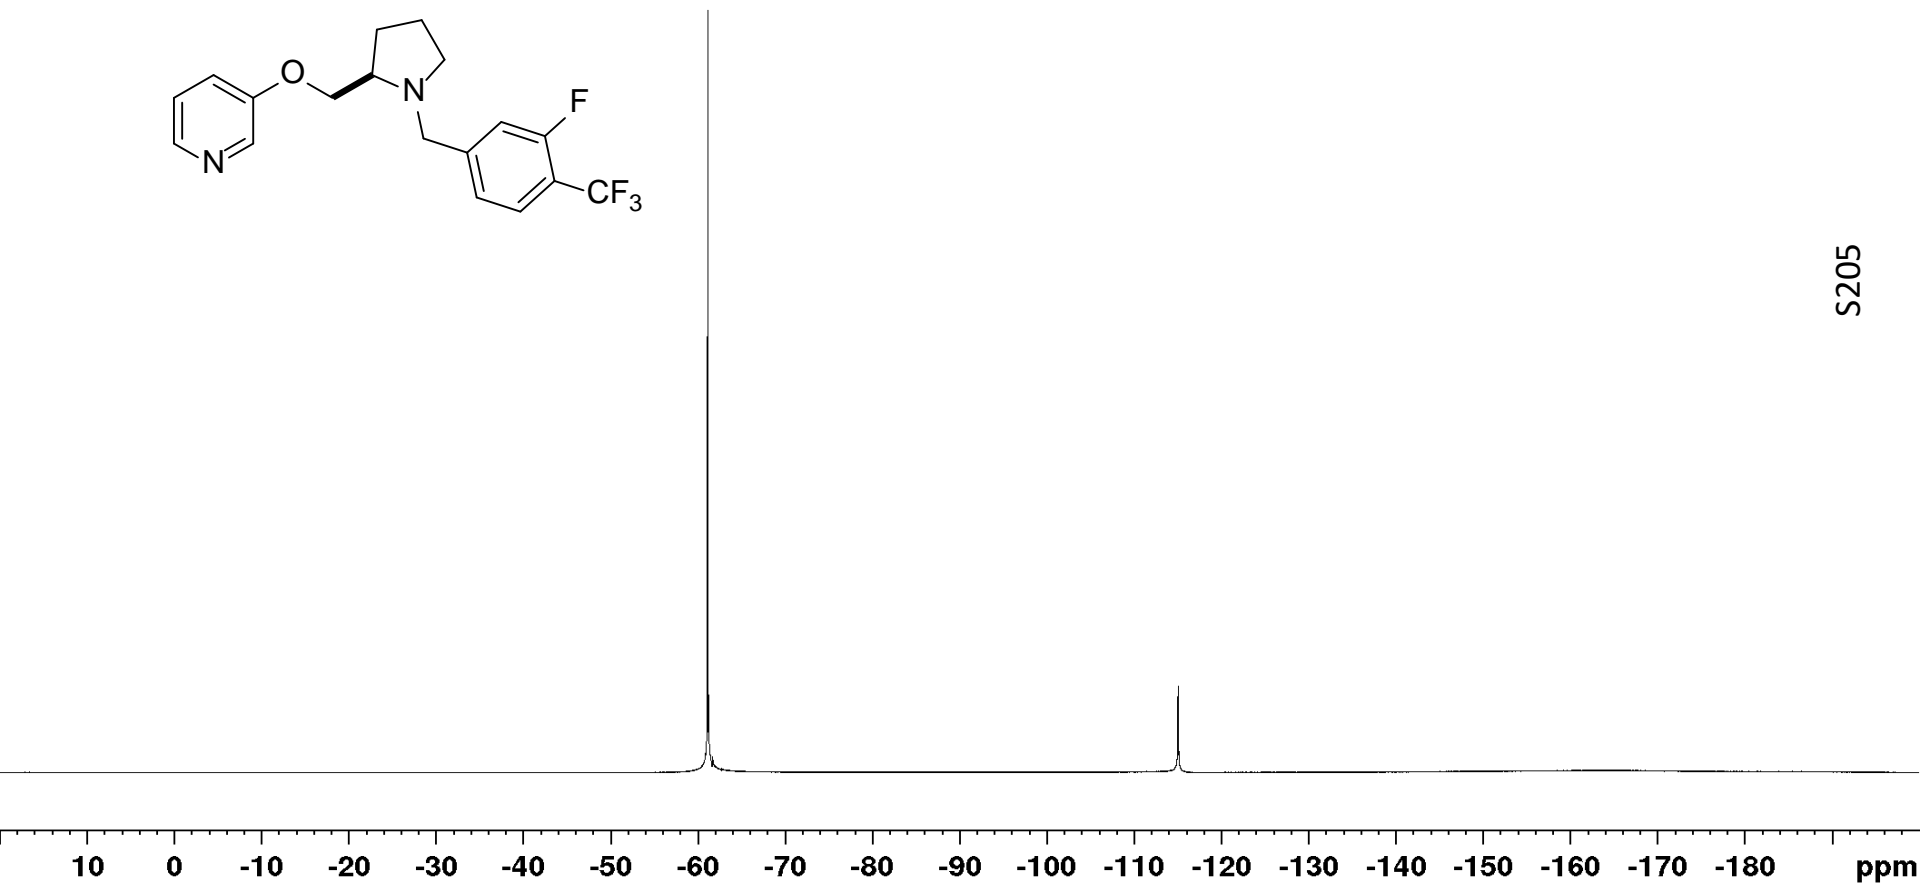

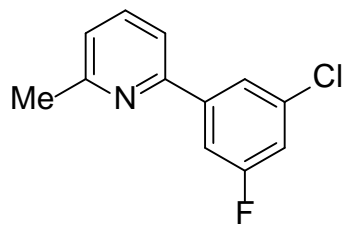

CDCl<sub>3</sub>, 400 MHz

7.79  
7.68  
7.66  
7.64  
7.49  
7.47  
7.26  
7.16  
7.14  
7.12  
7.10

2.62

1.00 2.11 1.09 2.05

3.32

9.5 9.0 8.5 8.0 7.5 7.0 6.5 6.0 5.5 5.0 4.5 4.0 3.5 3.0 2.5 2.0 1.5 1.0 0.5 0

Chemical Shift (ppm)

S206

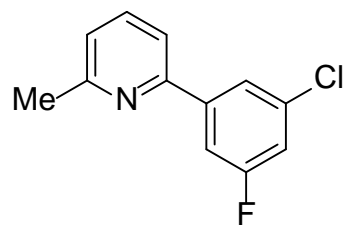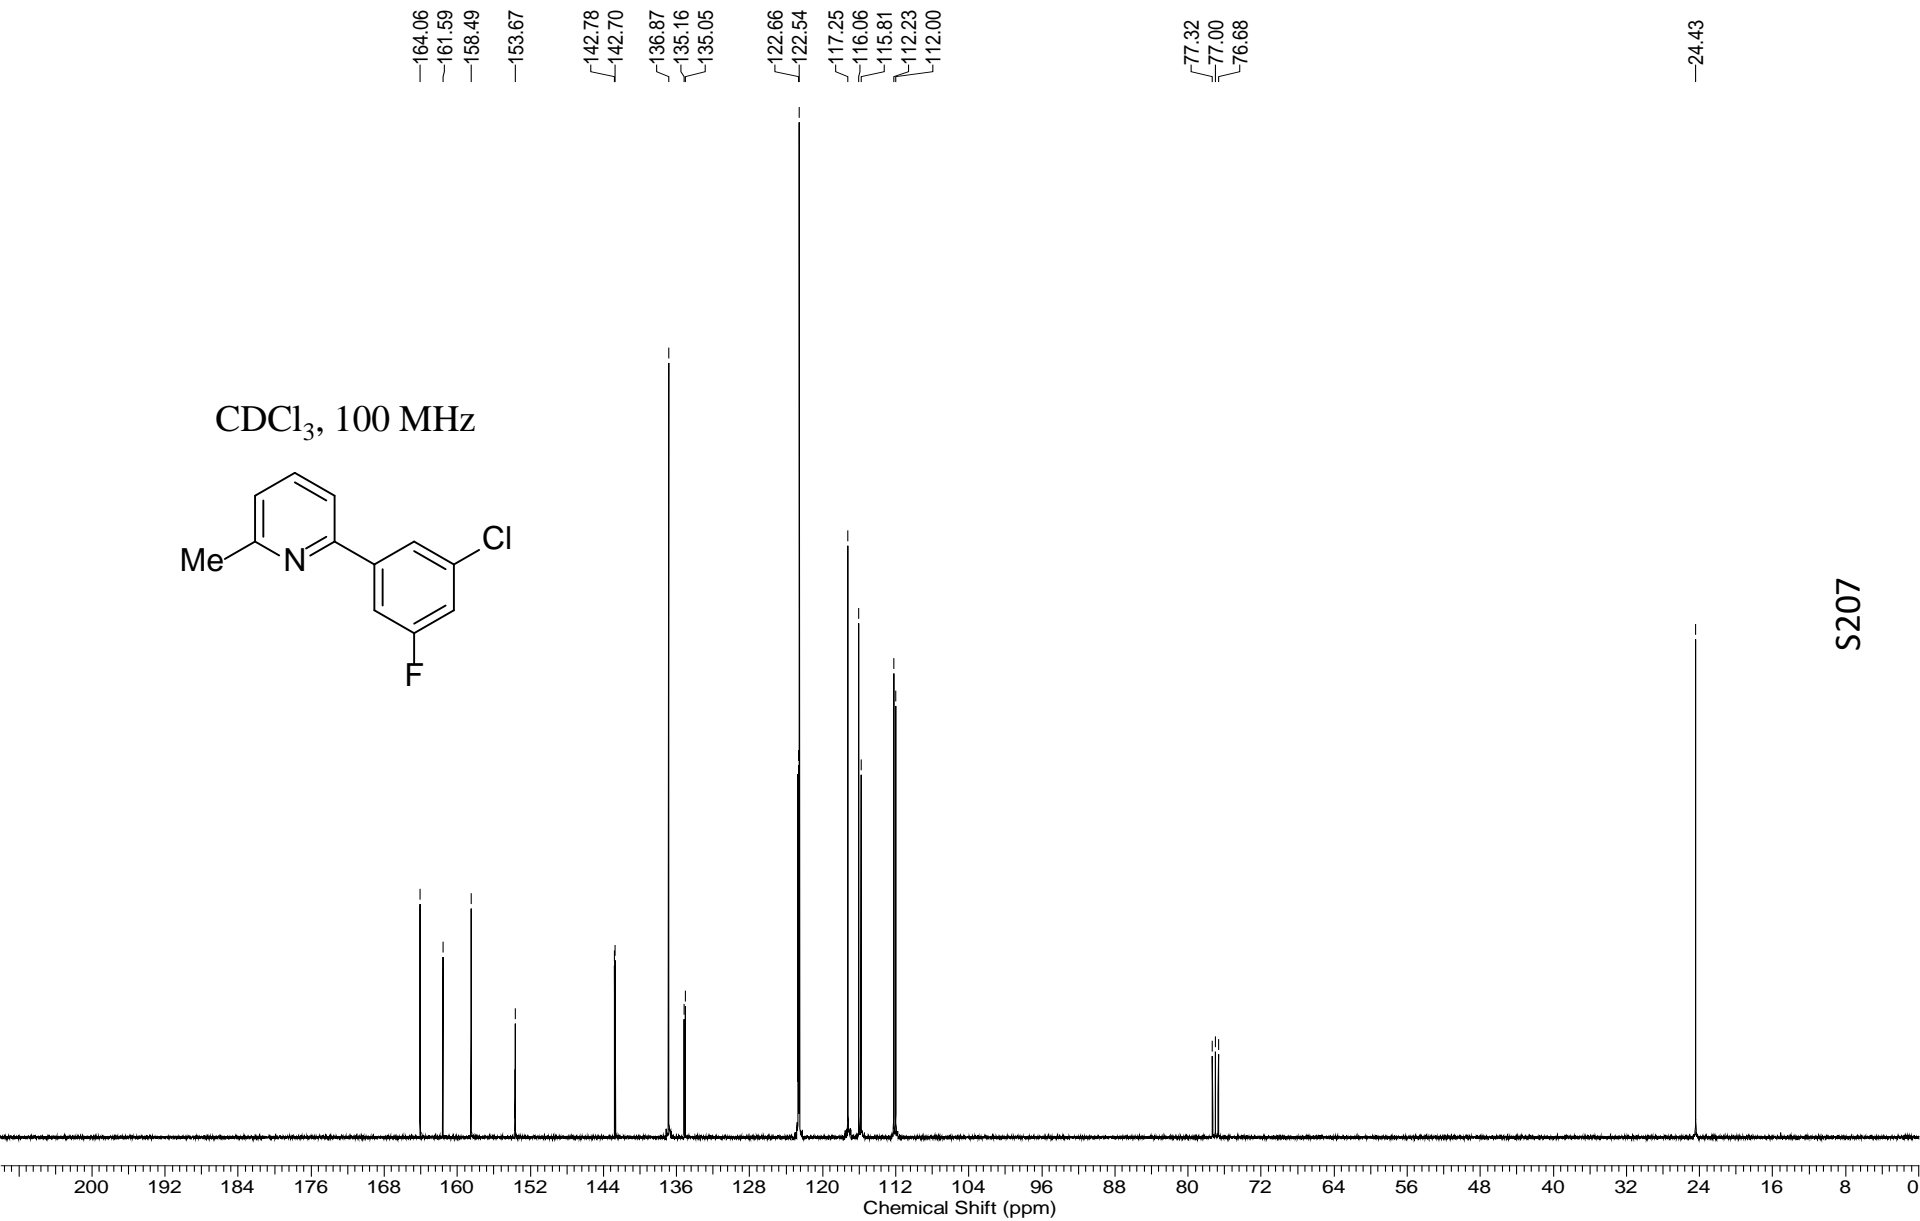

S207

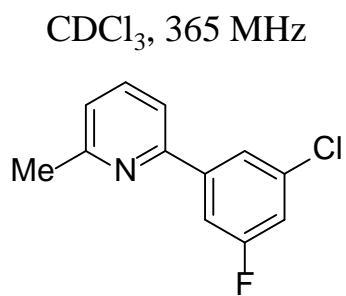

110.79  
110.81

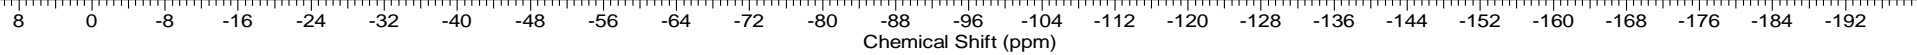

S208



8.91  
8.91  
8.65  
8.65  
8.64  
8.00  
8.00  
7.95  
7.93  
7.93  
7.70  
7.68  
7.66  
7.57  
7.55  
7.42  
7.26  
7.17  
7.15

CDCl<sub>3</sub>, 400 MHz

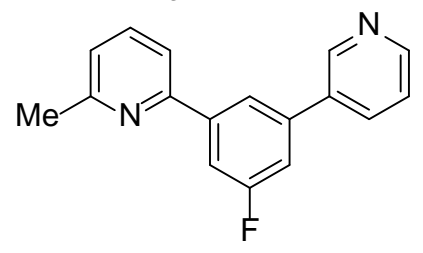

2.64

S209

1.00 0.97 1.04 1.08 1.02 1.05 1.08 1.05 1.03 1.01

3.24

9.5 9.0 8.5 8.0 7.5 7.0 6.5 6.0 5.5 5.0 4.5 4.0 3.5 3.0 2.5 2.0 1.5 1.0 0.5 0

Chemical Shift (ppm)

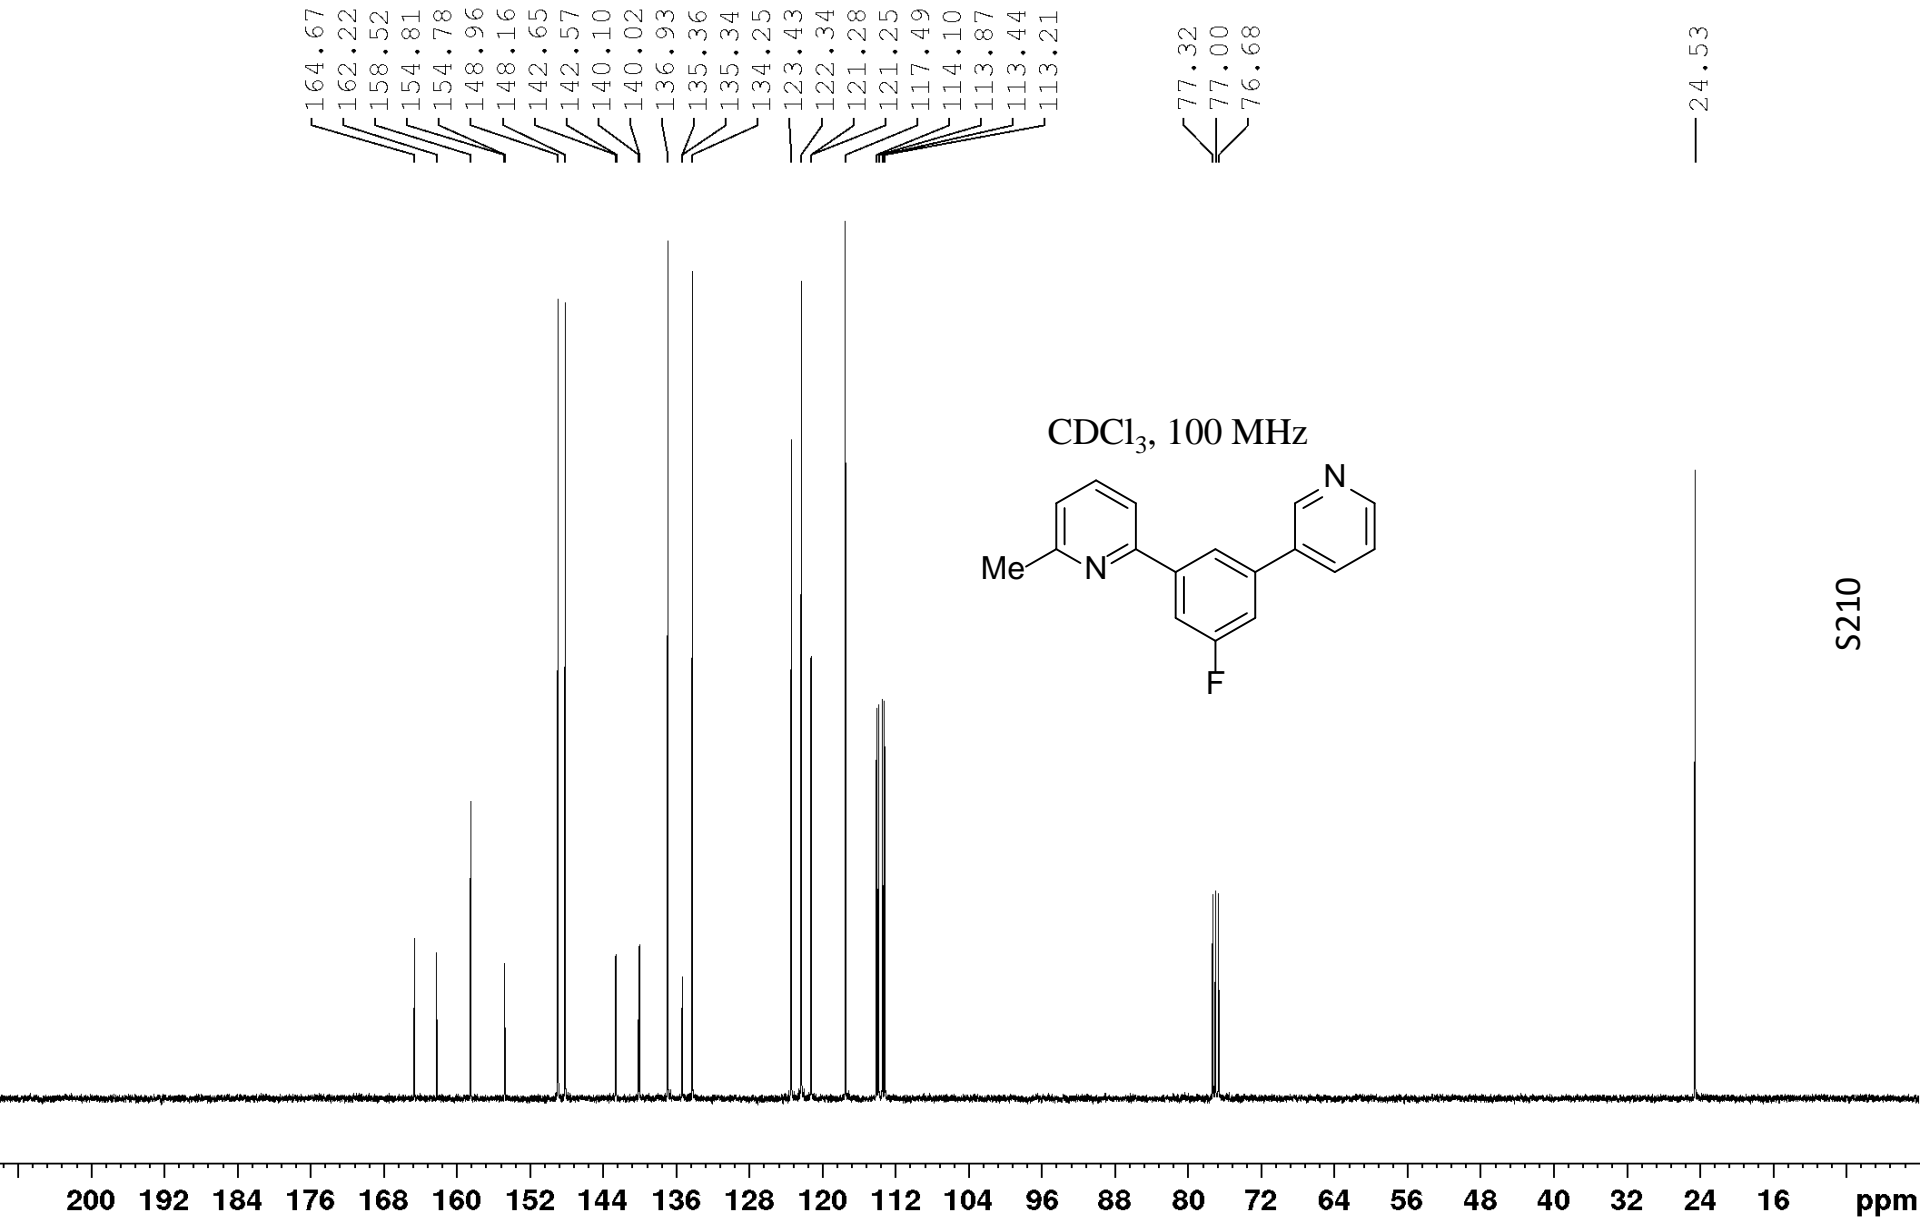

S210

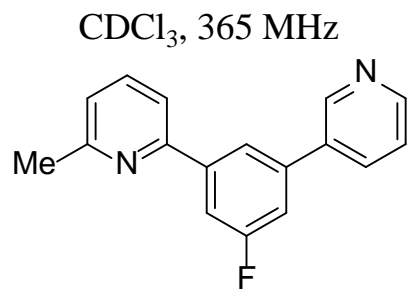

112.31  
112.34

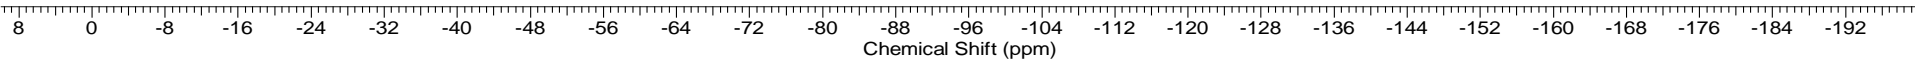

S211

8.85  
8.84  
8.24  
8.22  
8.12  
8.10  
7.72  
7.72  
7.70  
7.70  
7.69  
7.68  
7.68  
7.56  
7.56  
7.55  
7.54  
7.54  
7.52  
7.52  
7.40  
7.39

3.87  
3.72  
3.72  
3.71  
3.70  
3.69  
3.69  
3.68  
3.68  
3.67  
3.66  
3.65  
3.65  
2.73  
2.70

1.89  
1.87  
1.84

1.13  
1.12

CDCl<sub>3</sub>, 400 MHz

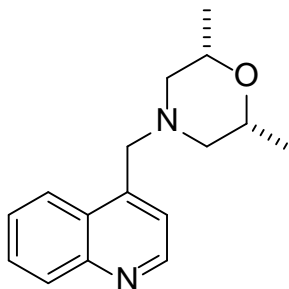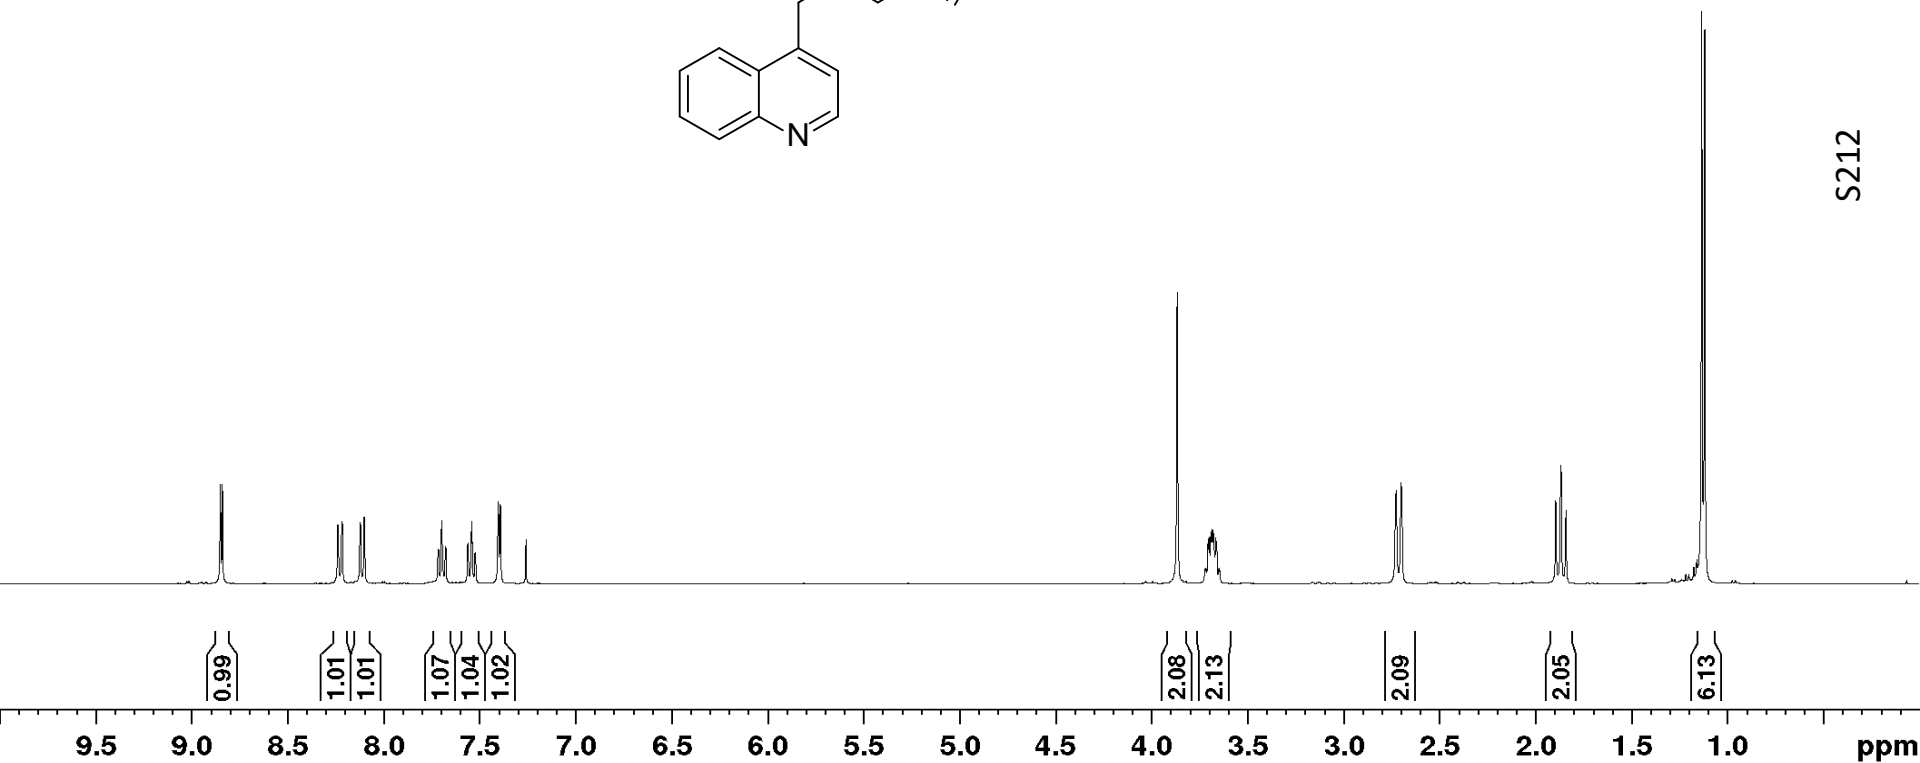

S212

CDCl<sub>3</sub>, 100 MHz

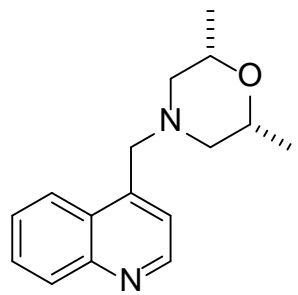

150.03  
148.34  
143.60  
129.89  
129.11  
127.62  
126.26  
124.17  
121.37

71.65  
59.62  
19.01

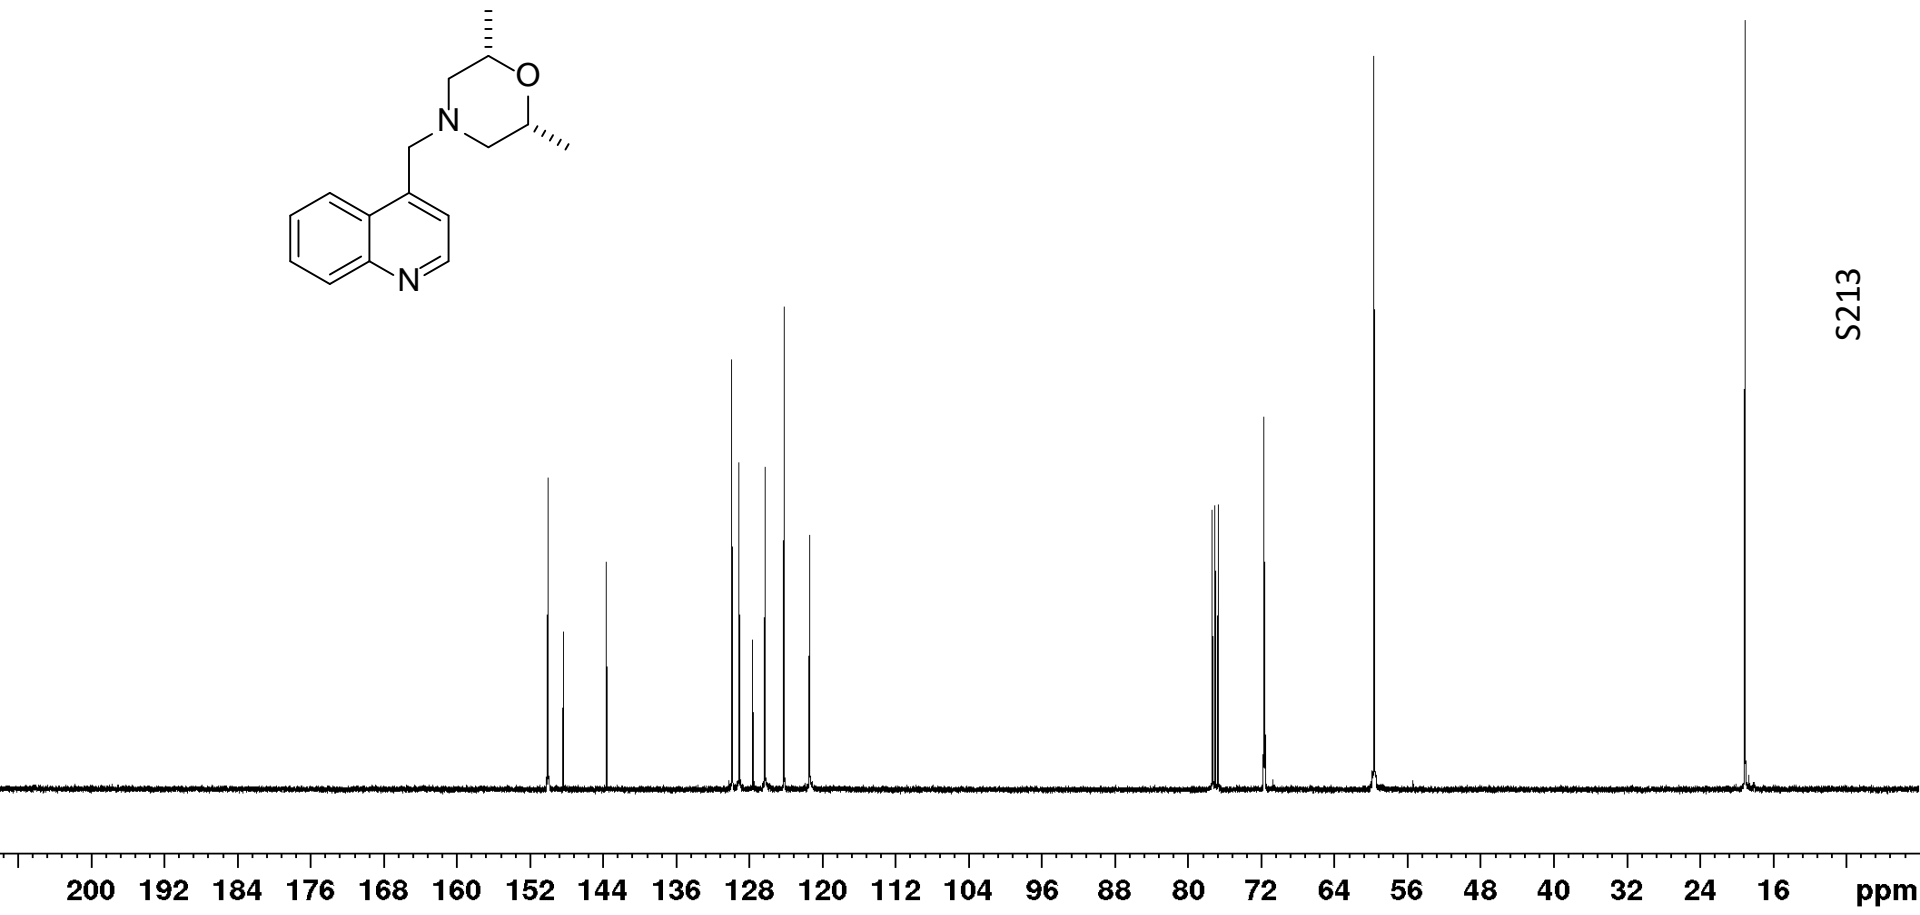

S213

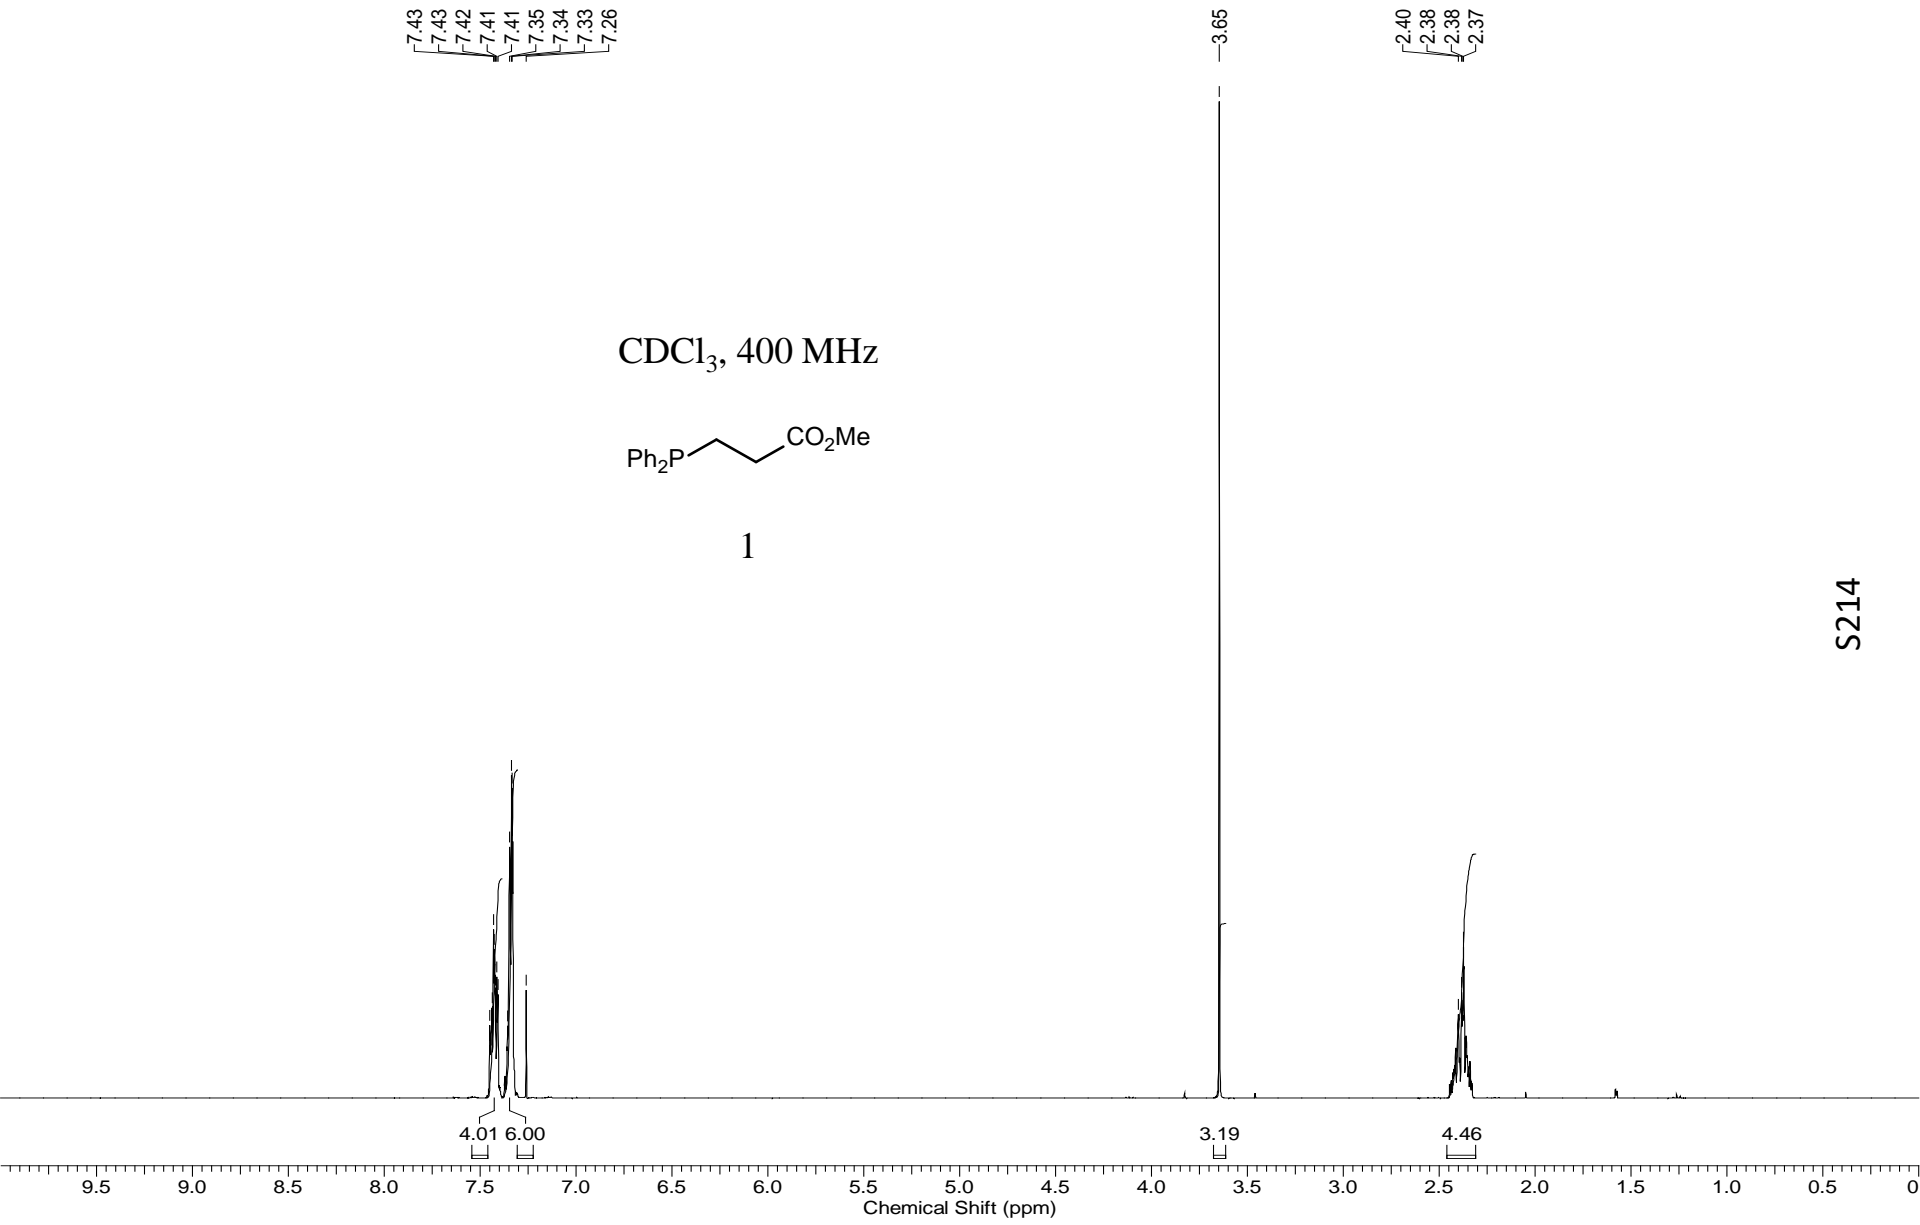

S214

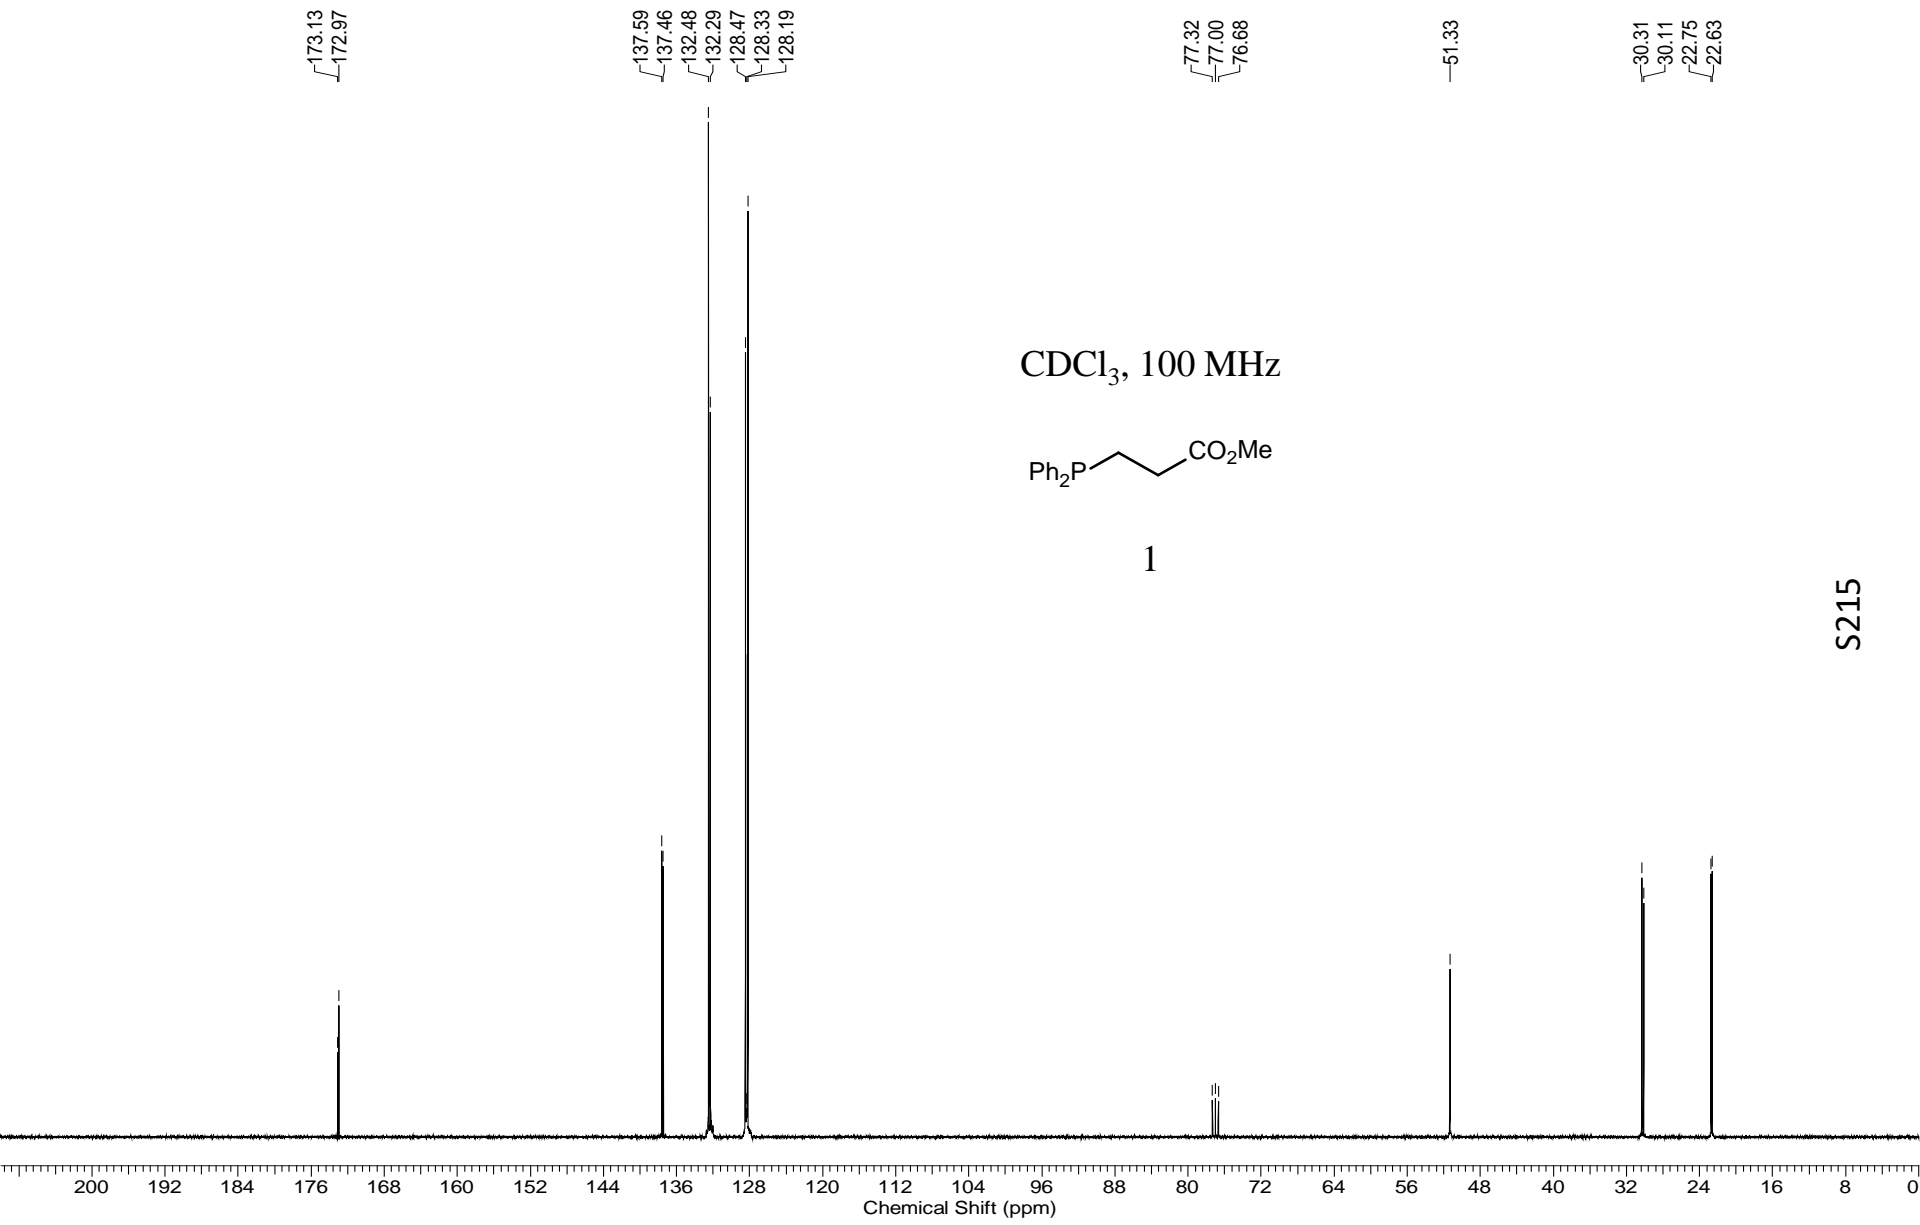

S215

CDCl<sub>3</sub>, 162 MHz

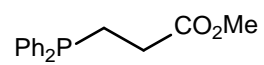

1

-15.76

S216

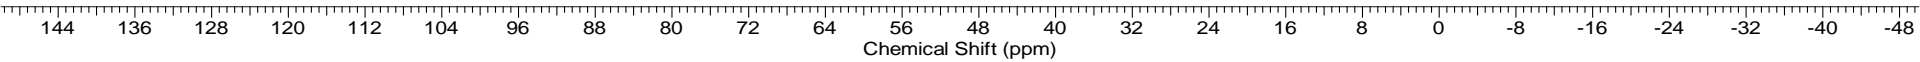



CDCl<sub>3</sub>, 162 MHz

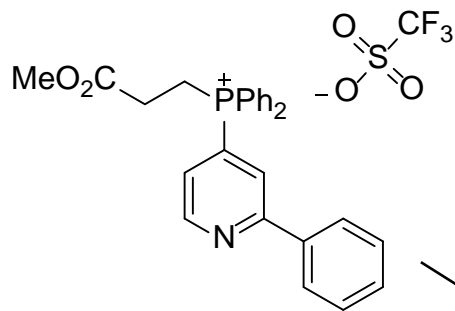

2a: Crude <sup>31</sup>P NMR

31.77  
24.84  
19.35

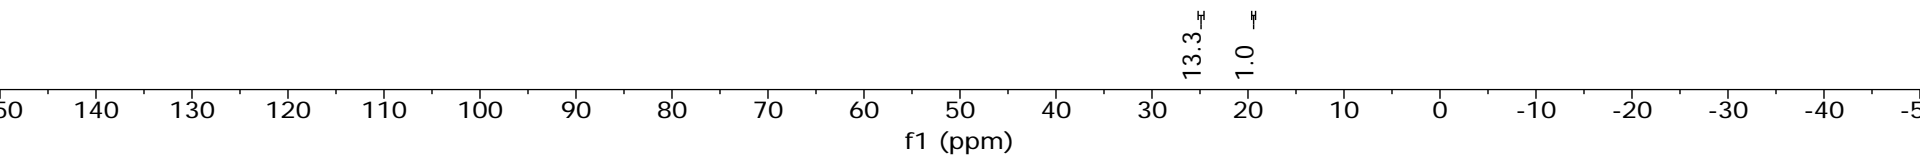

S217

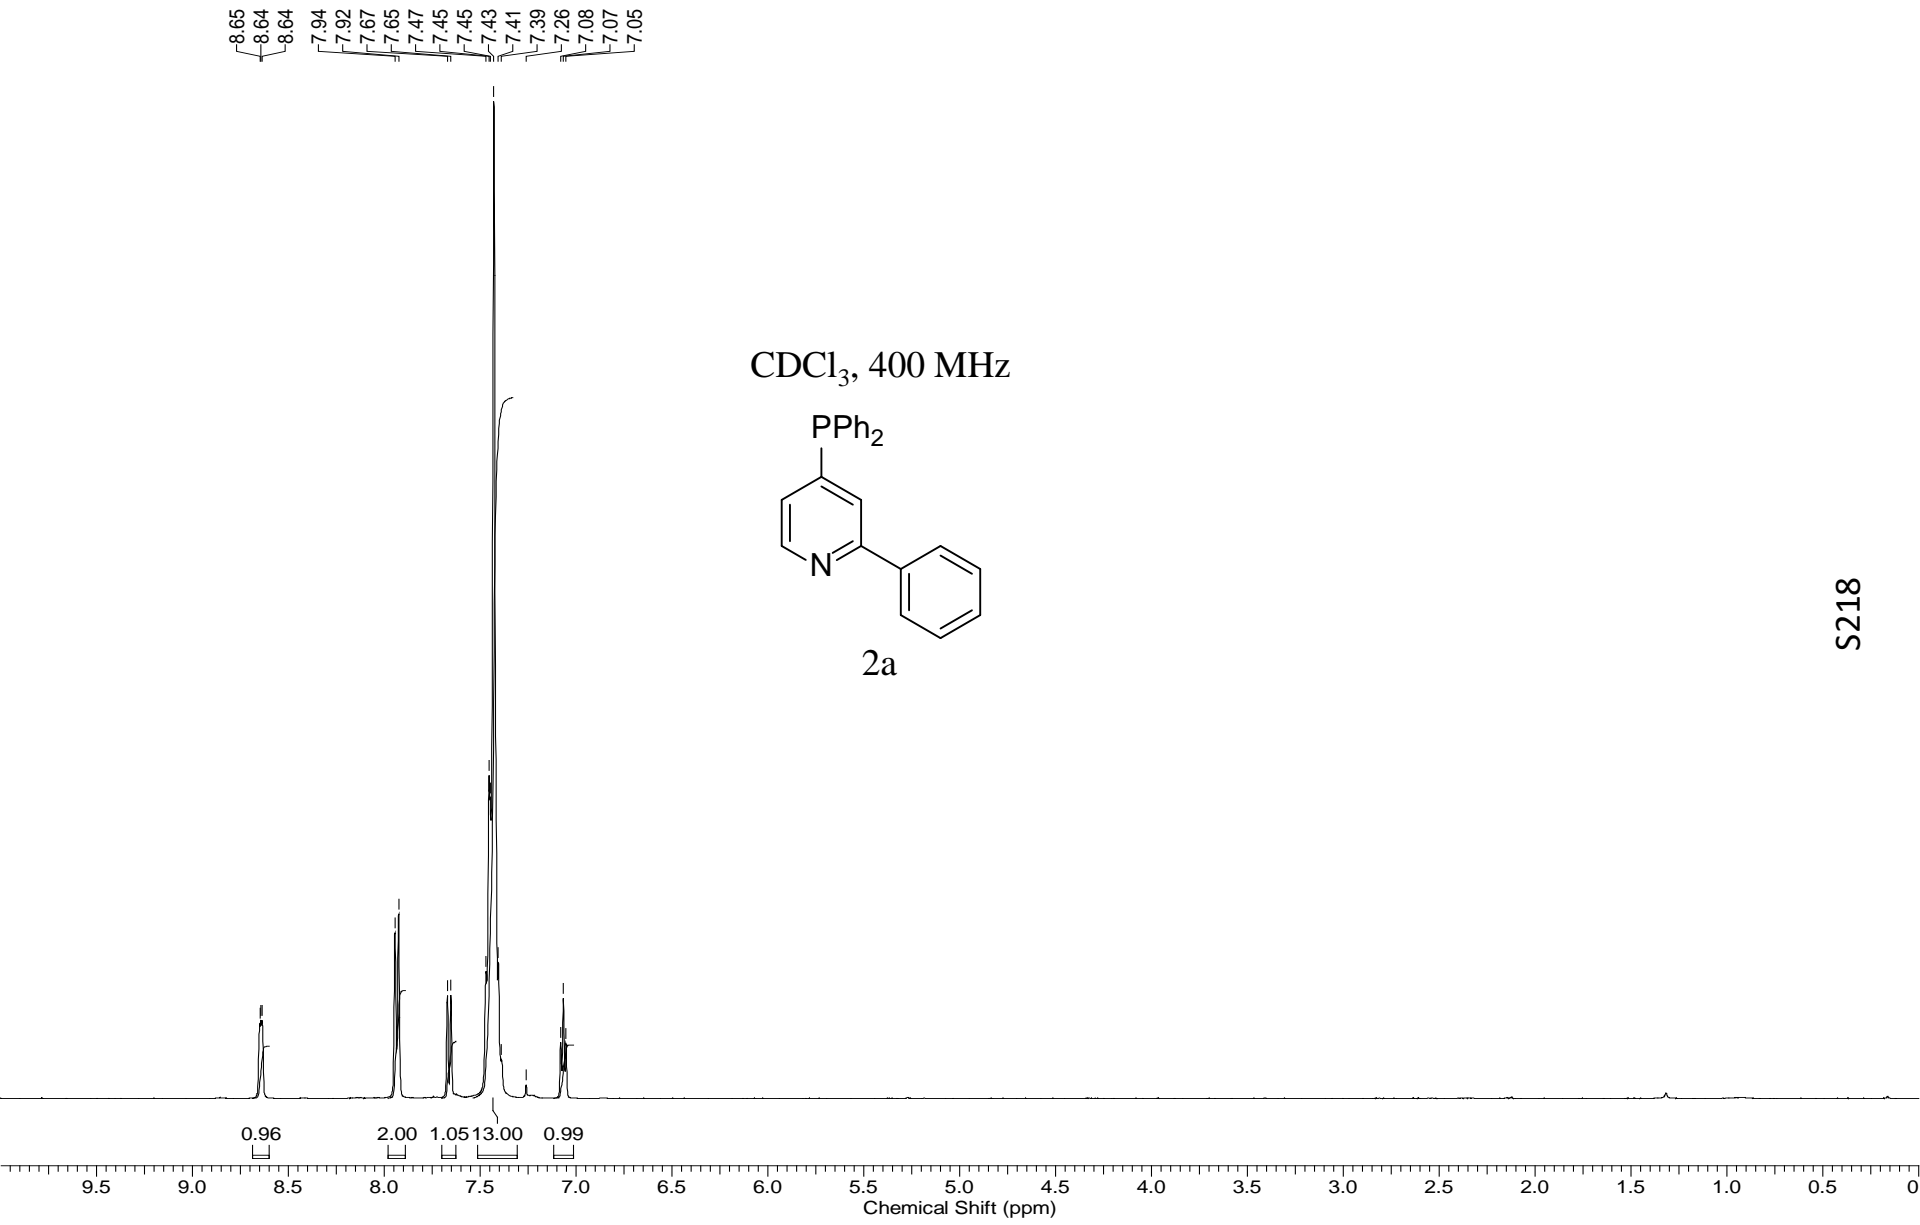

CDCl<sub>3</sub>, 400 MHz

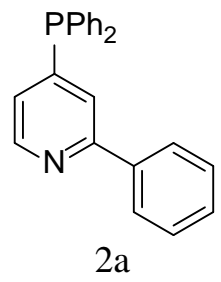

S218

CDCl<sub>3</sub>, 100 MHz

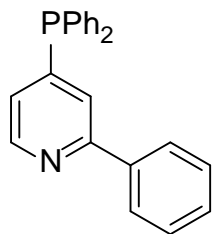

2a

156.82  
156.77  
149.57  
149.40  
149.14  
149.10  
139.04  
134.98  
134.88  
134.20  
133.99  
129.44  
128.94  
128.80  
128.73  
128.62  
126.86  
125.54  
125.41  
124.22  
124.04

77.32  
77.00  
76.68

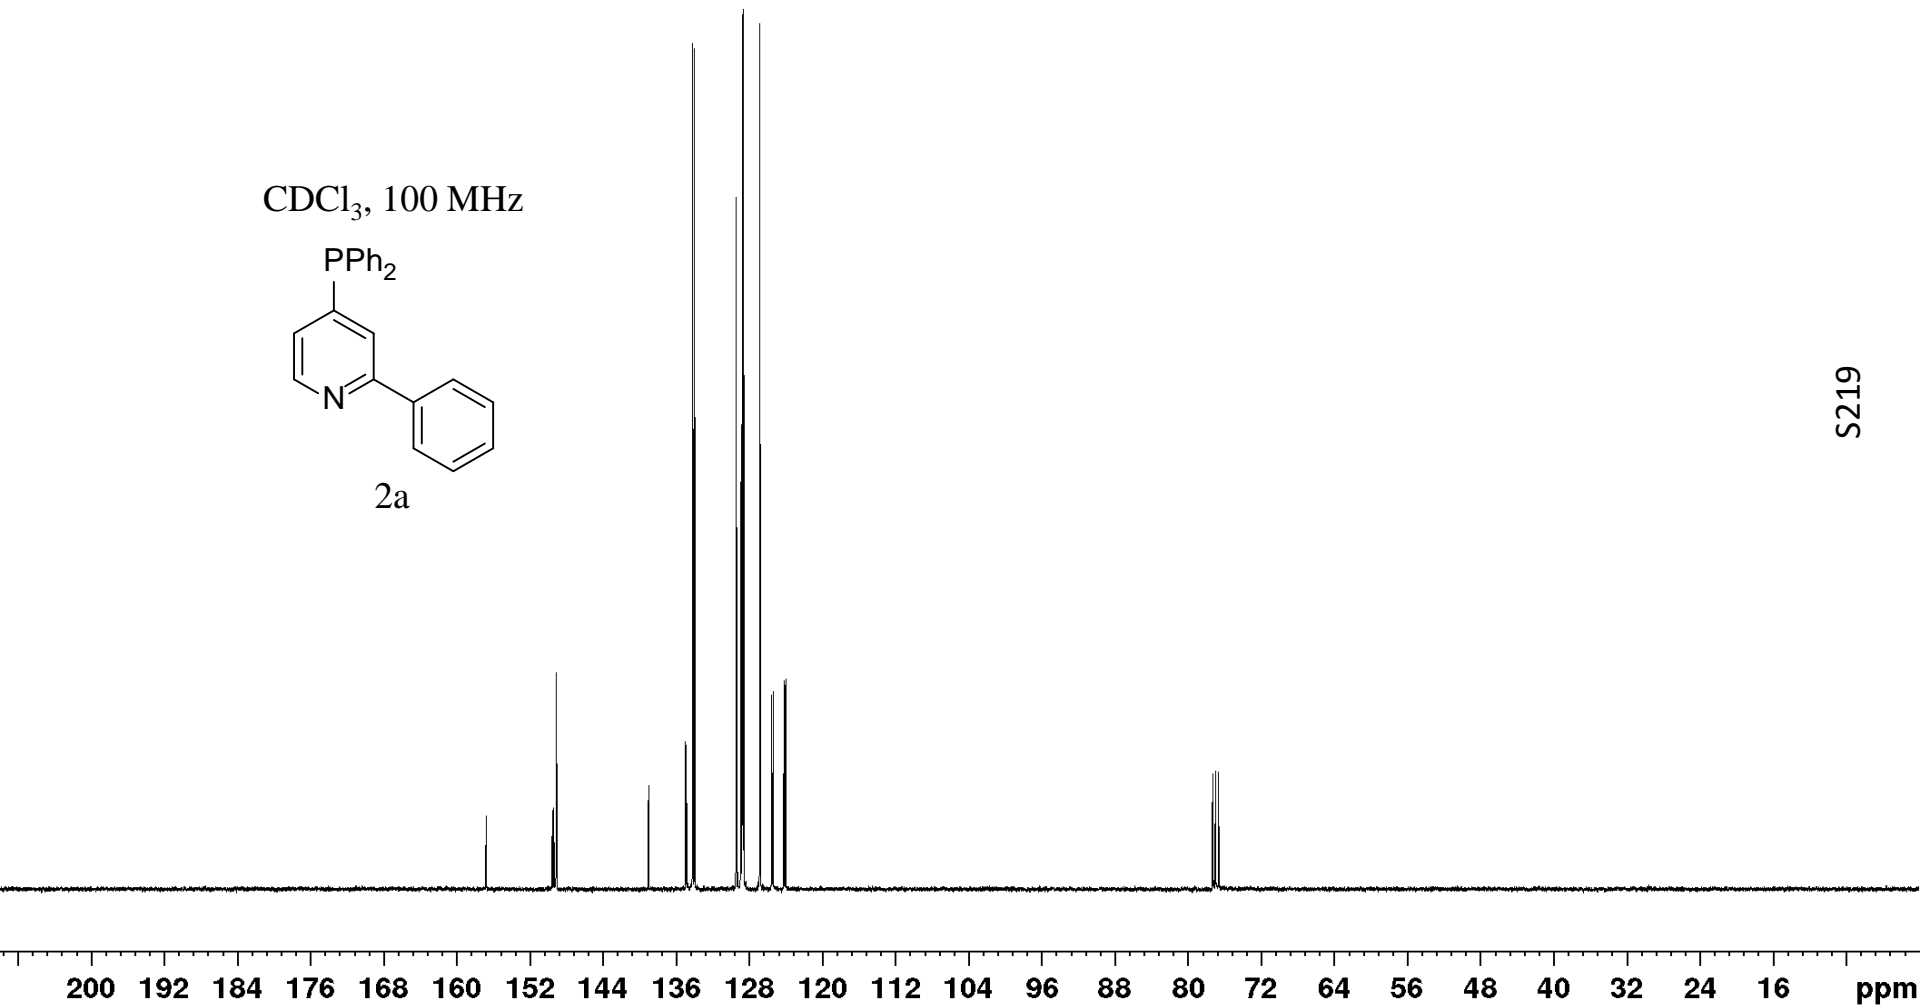

CDCl<sub>3</sub>, 162 MHz

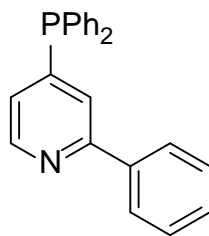

2a

— 6.38

S220

140 130 120 110 100 90 80 70 60 50 40 30 20 10 0 -10 -20 -30 ppm

CDCl<sub>3</sub>, 162 MHz

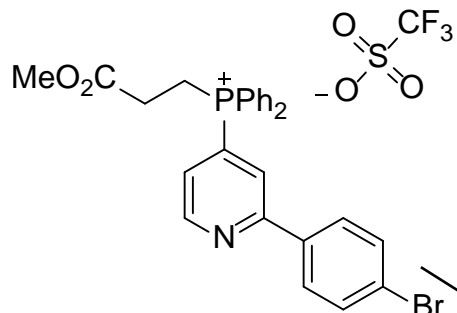

2b: Crude <sup>31</sup>P NMR

31.70  
25.04  
19.71

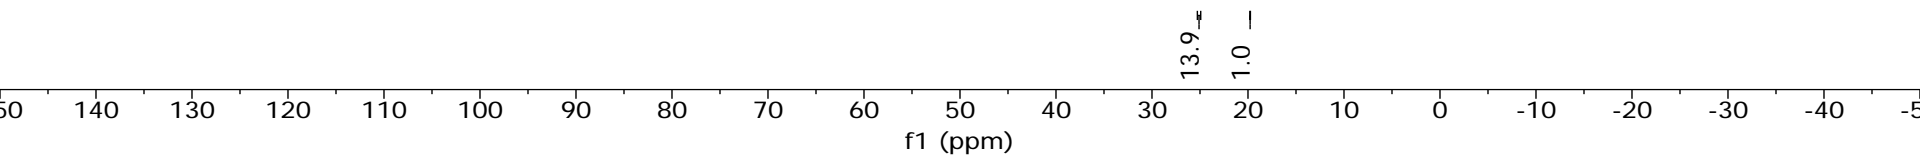

S221

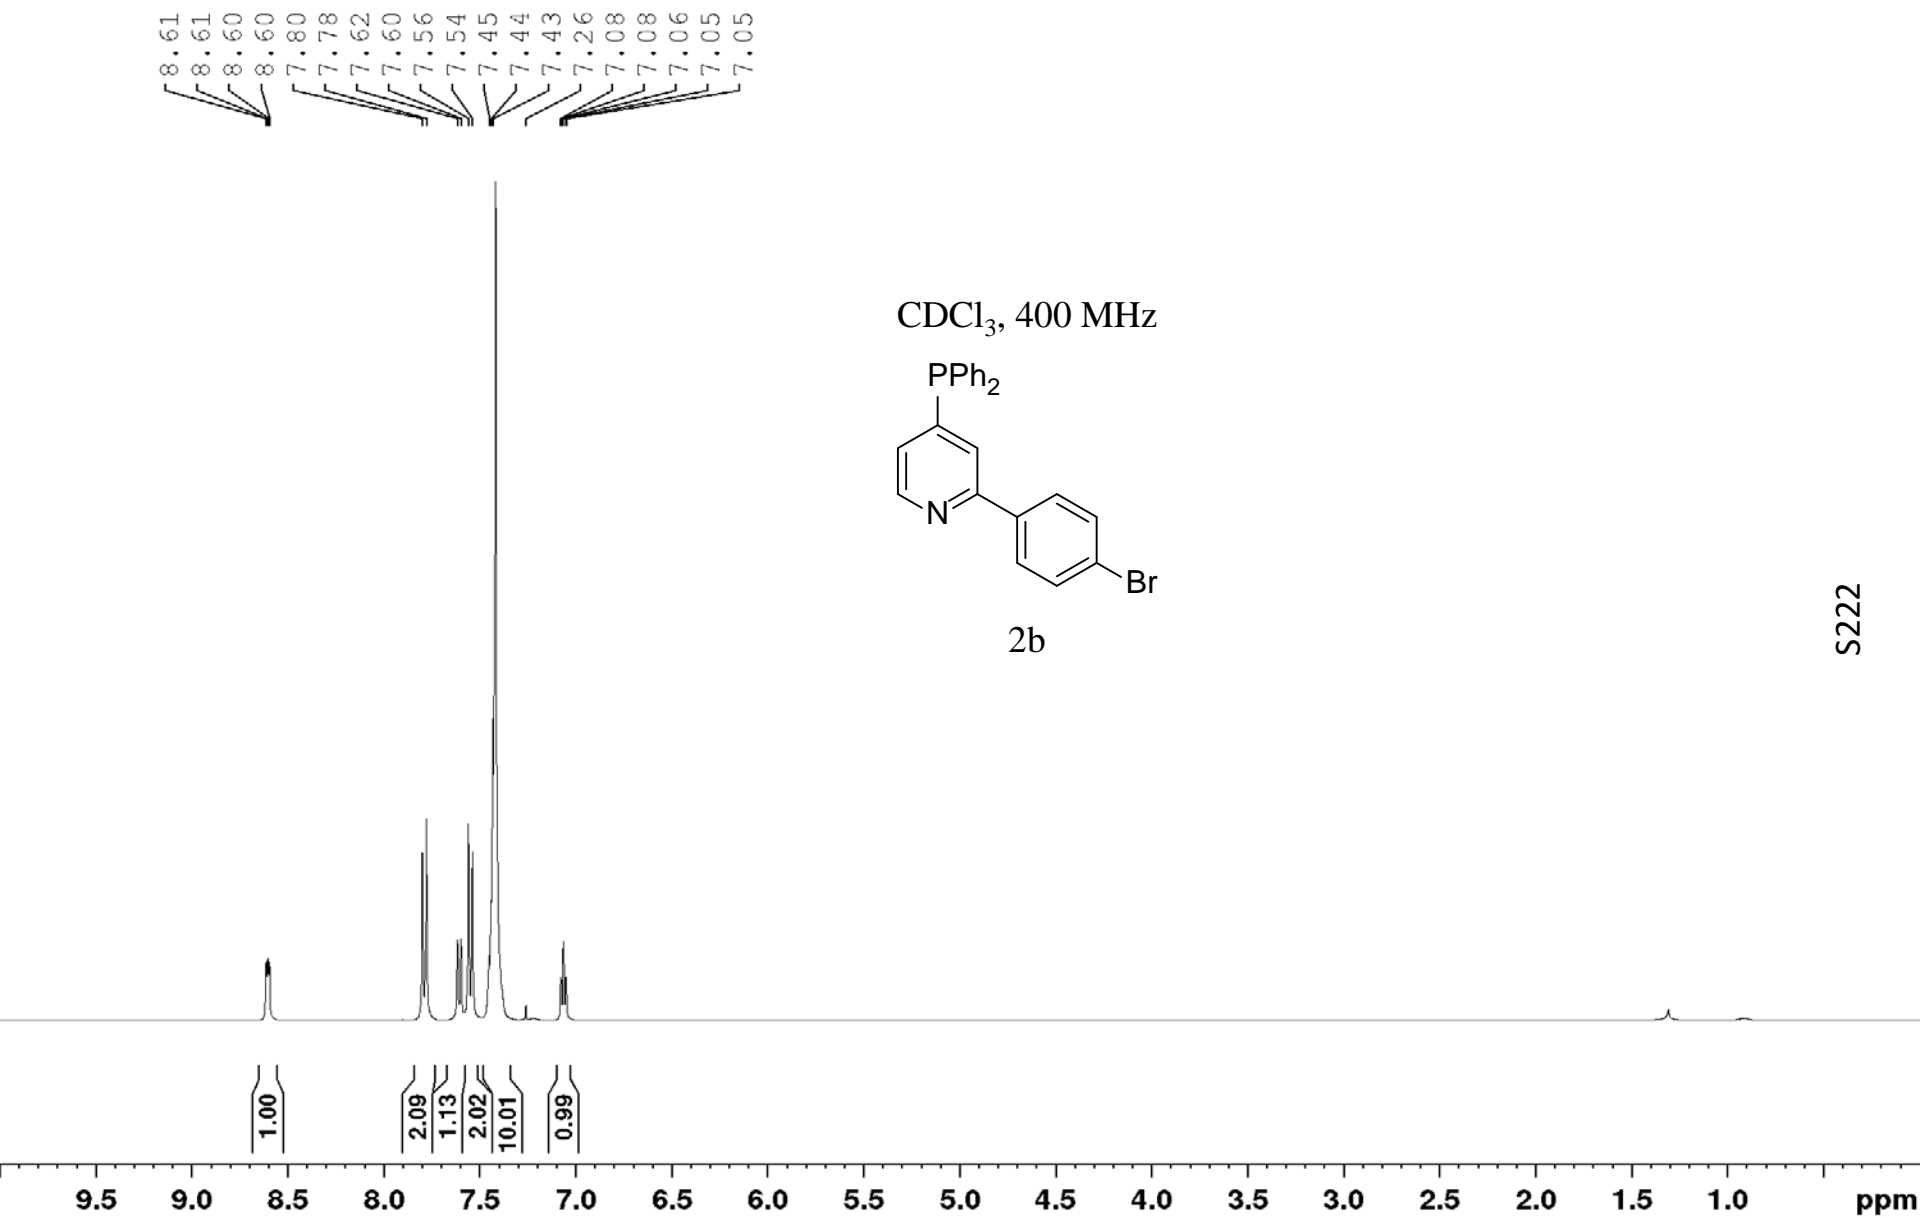

CDCl<sub>3</sub>, 100 MHz

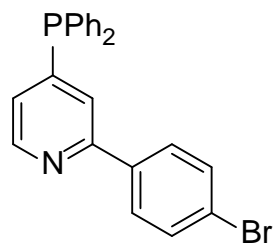

2b

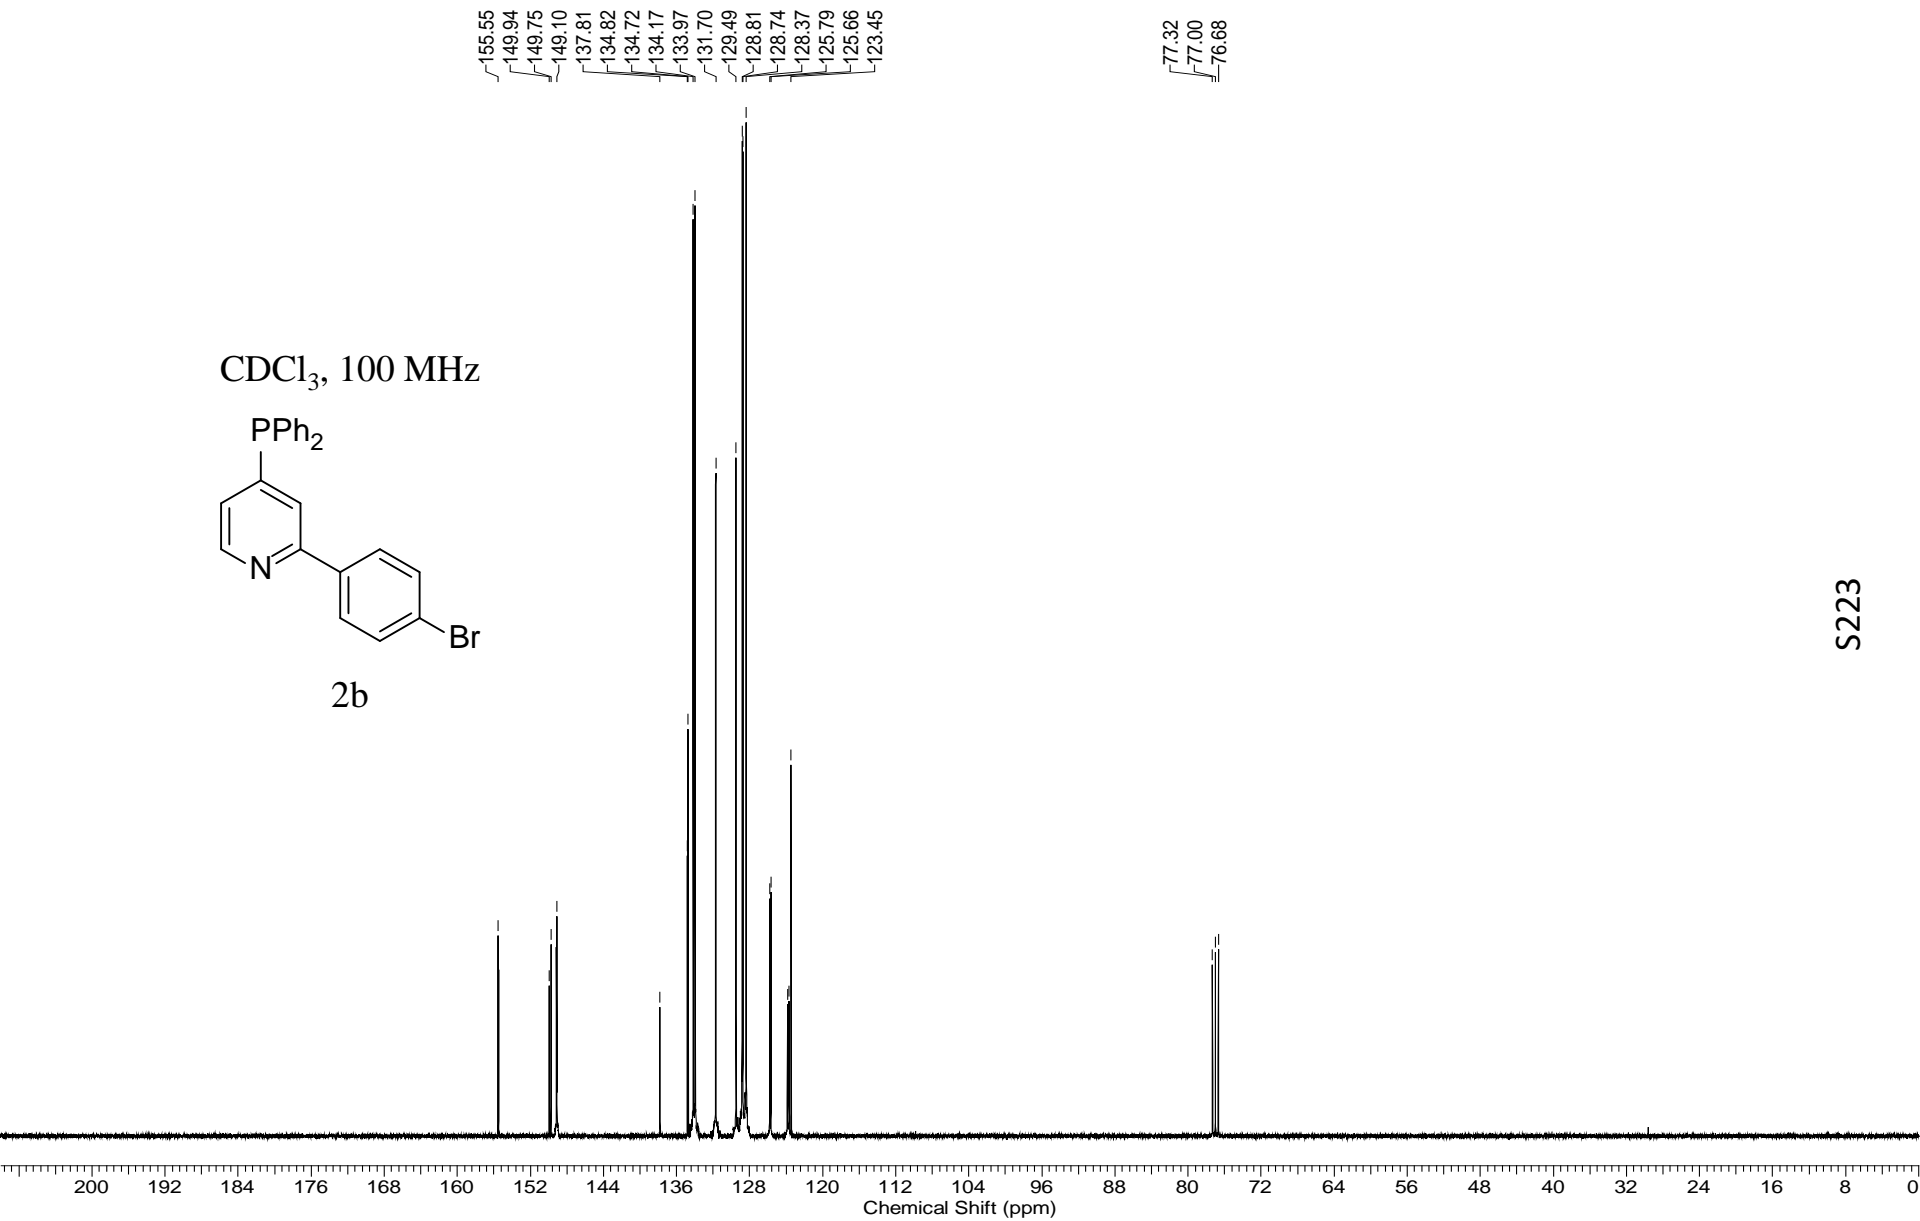

S223

CDCl<sub>3</sub>, 162 MHz

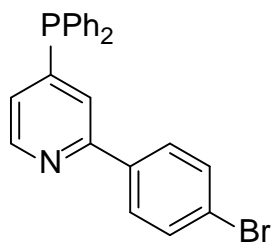

2b

-6.35

S224

140 130 120 110 100 90 80 70 60 50 40 30 20 10 0 -10 -20 -30 ppm



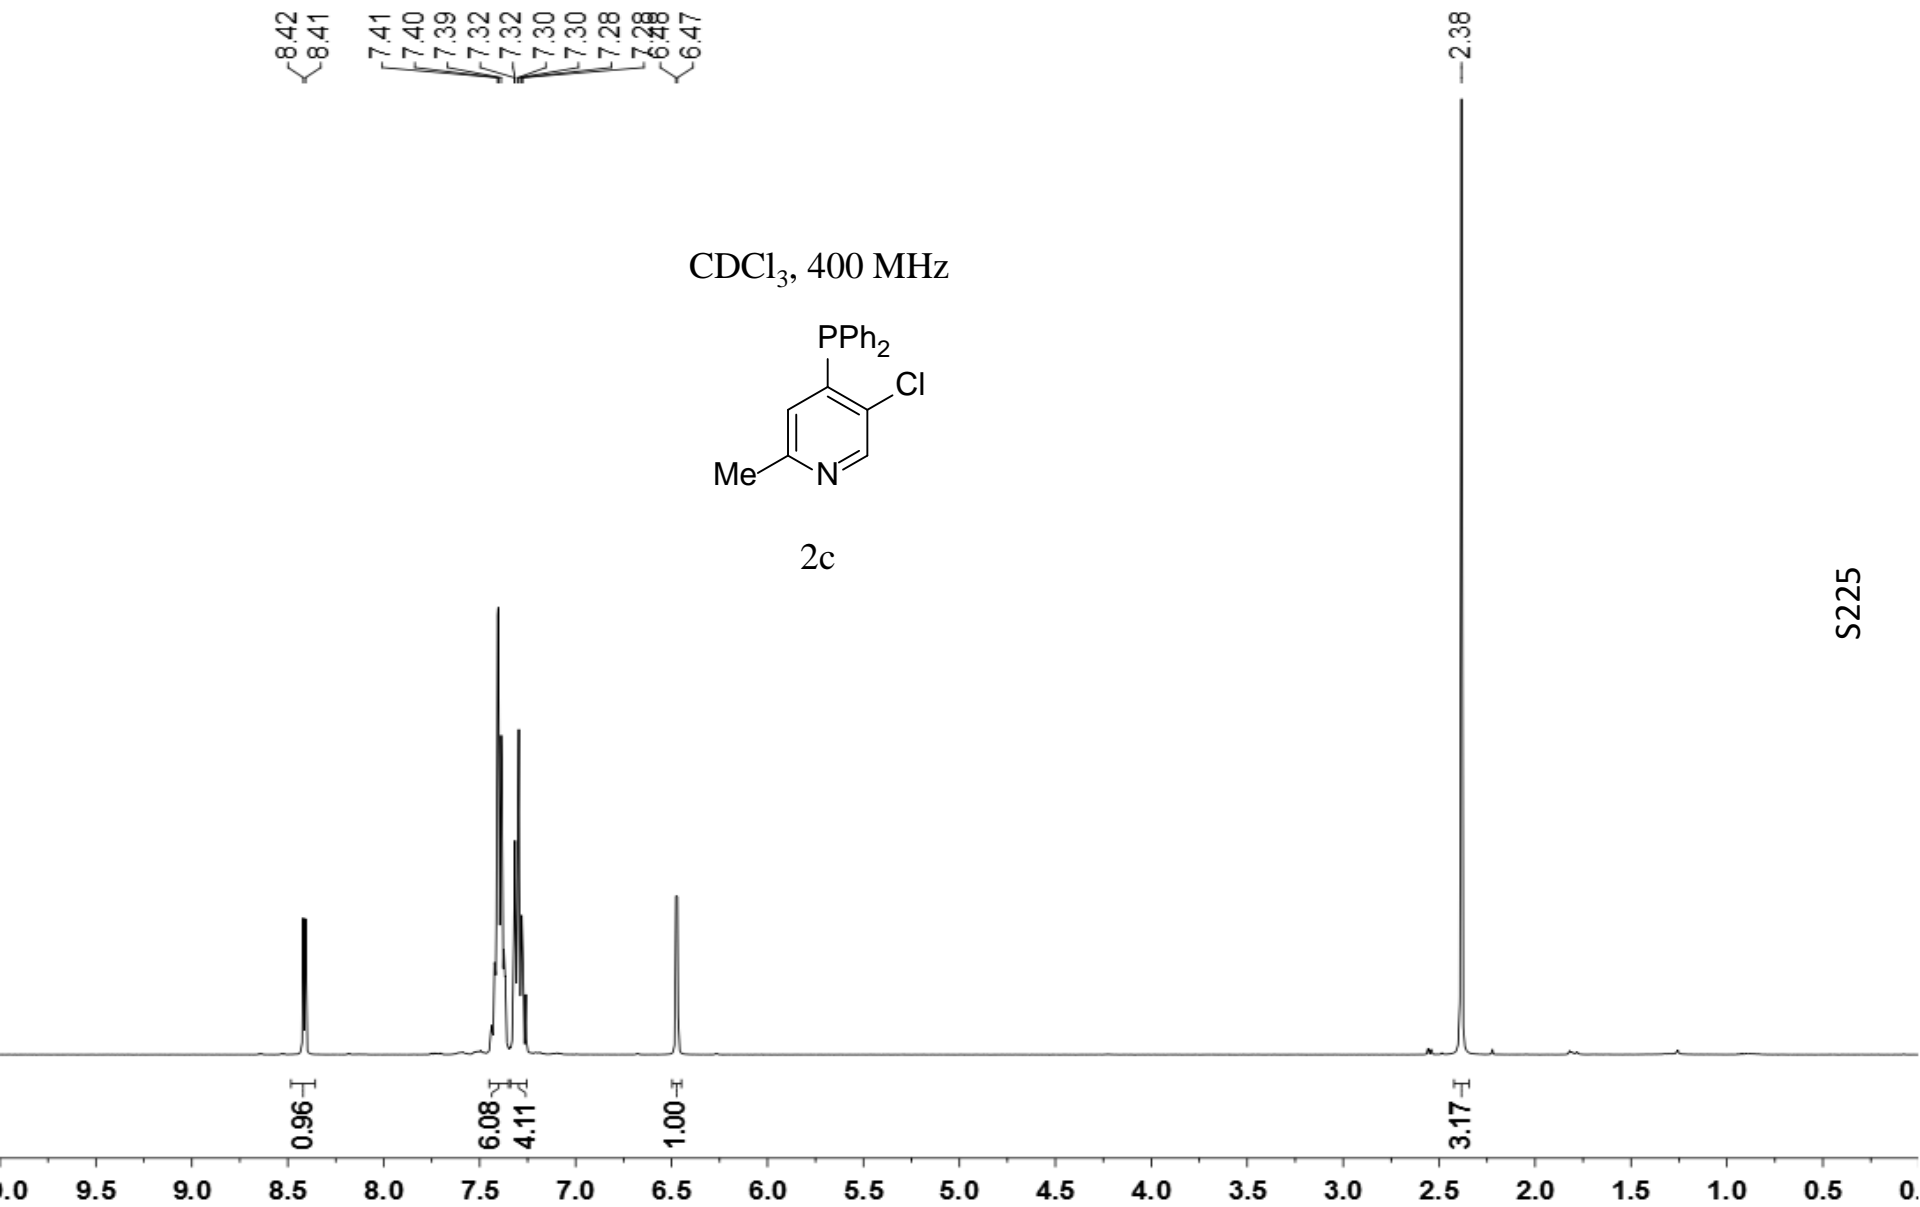

CDCl<sub>3</sub>, 100 MHz

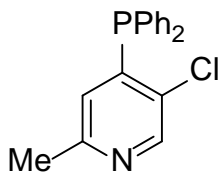

2c

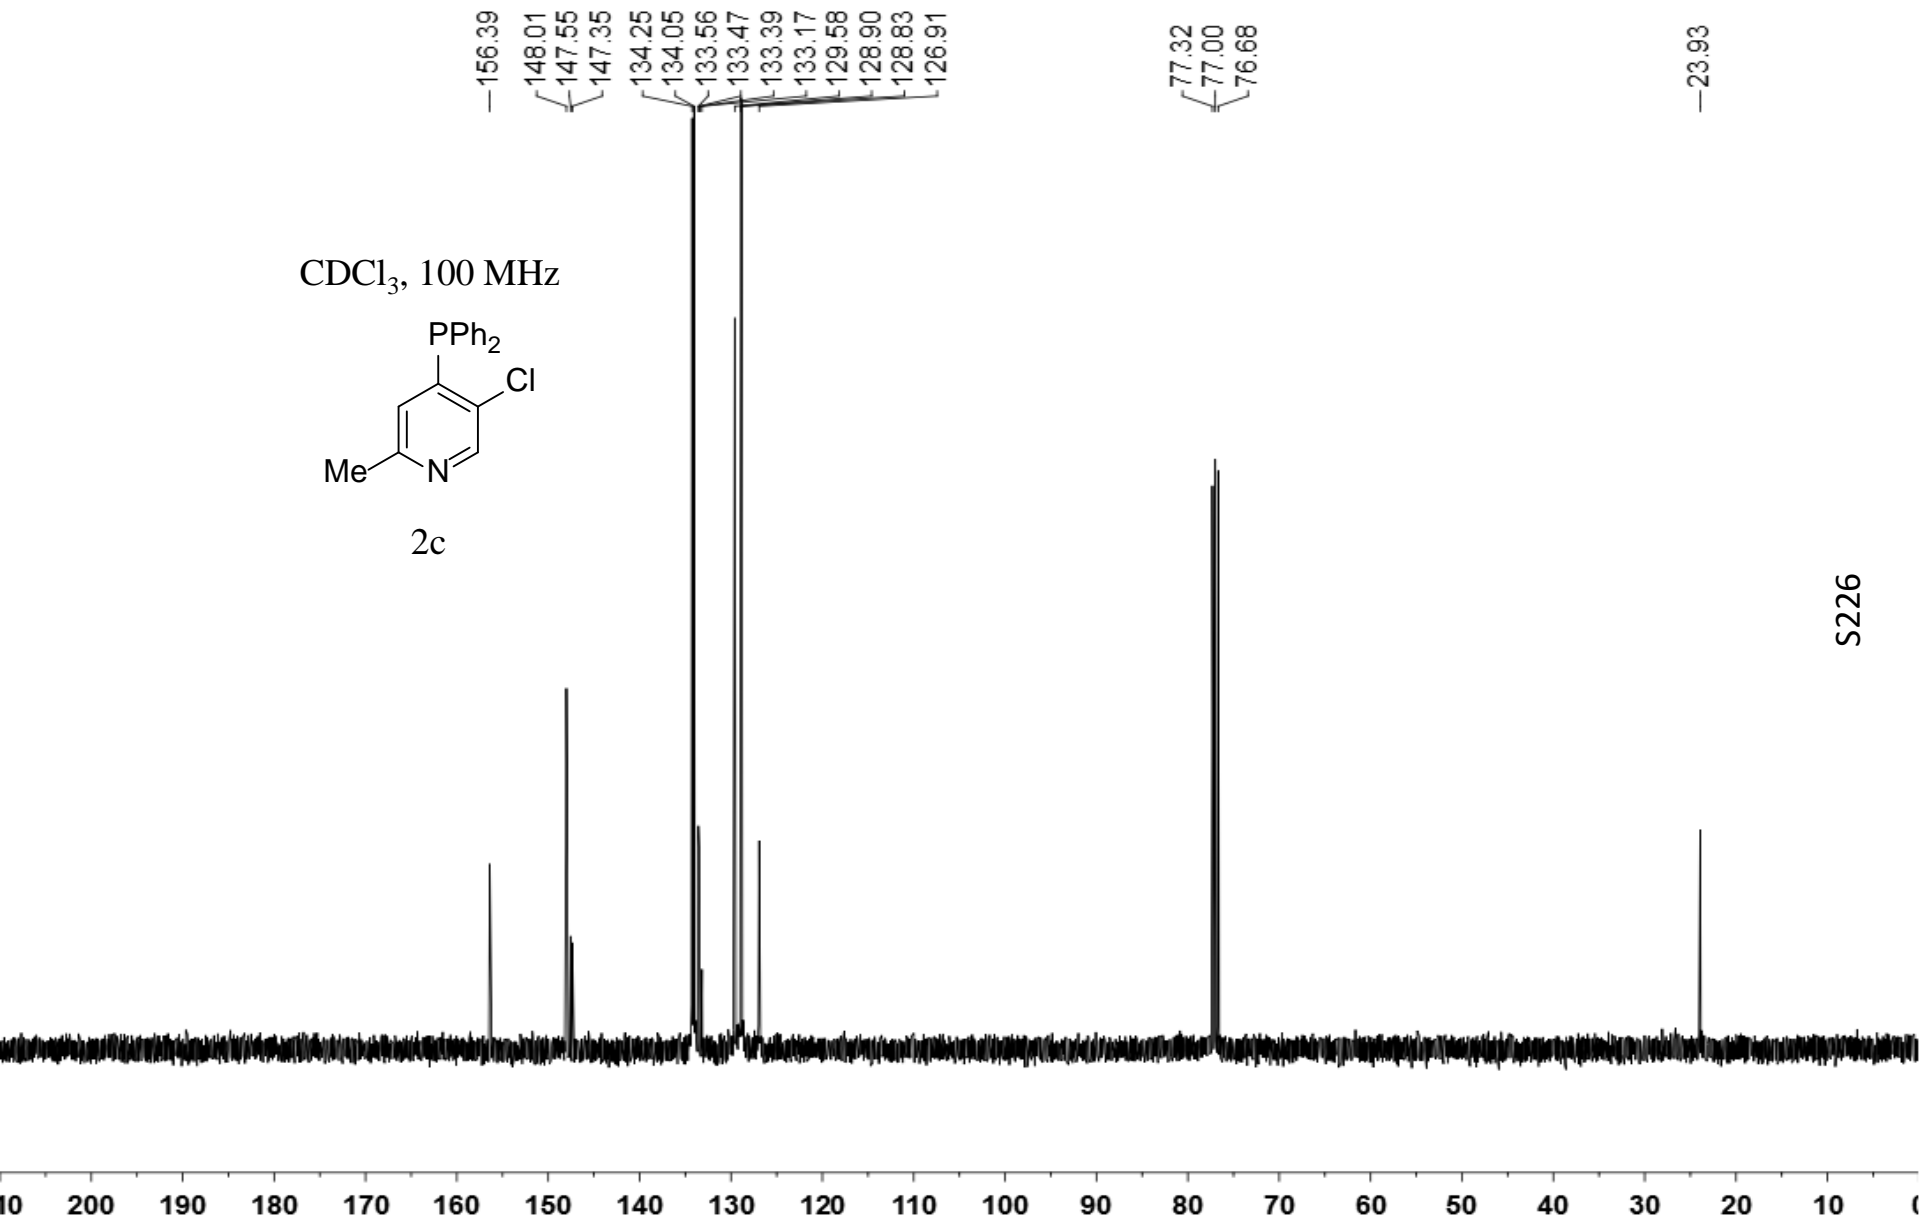

S226

CDCl<sub>3</sub>, 162 MHz

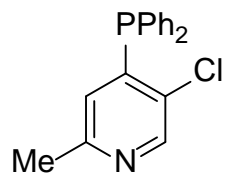

2c

--11.81

S227

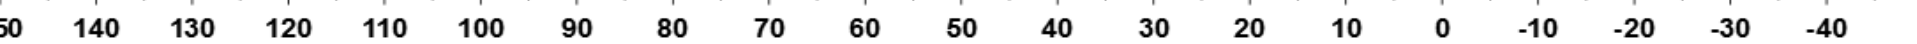

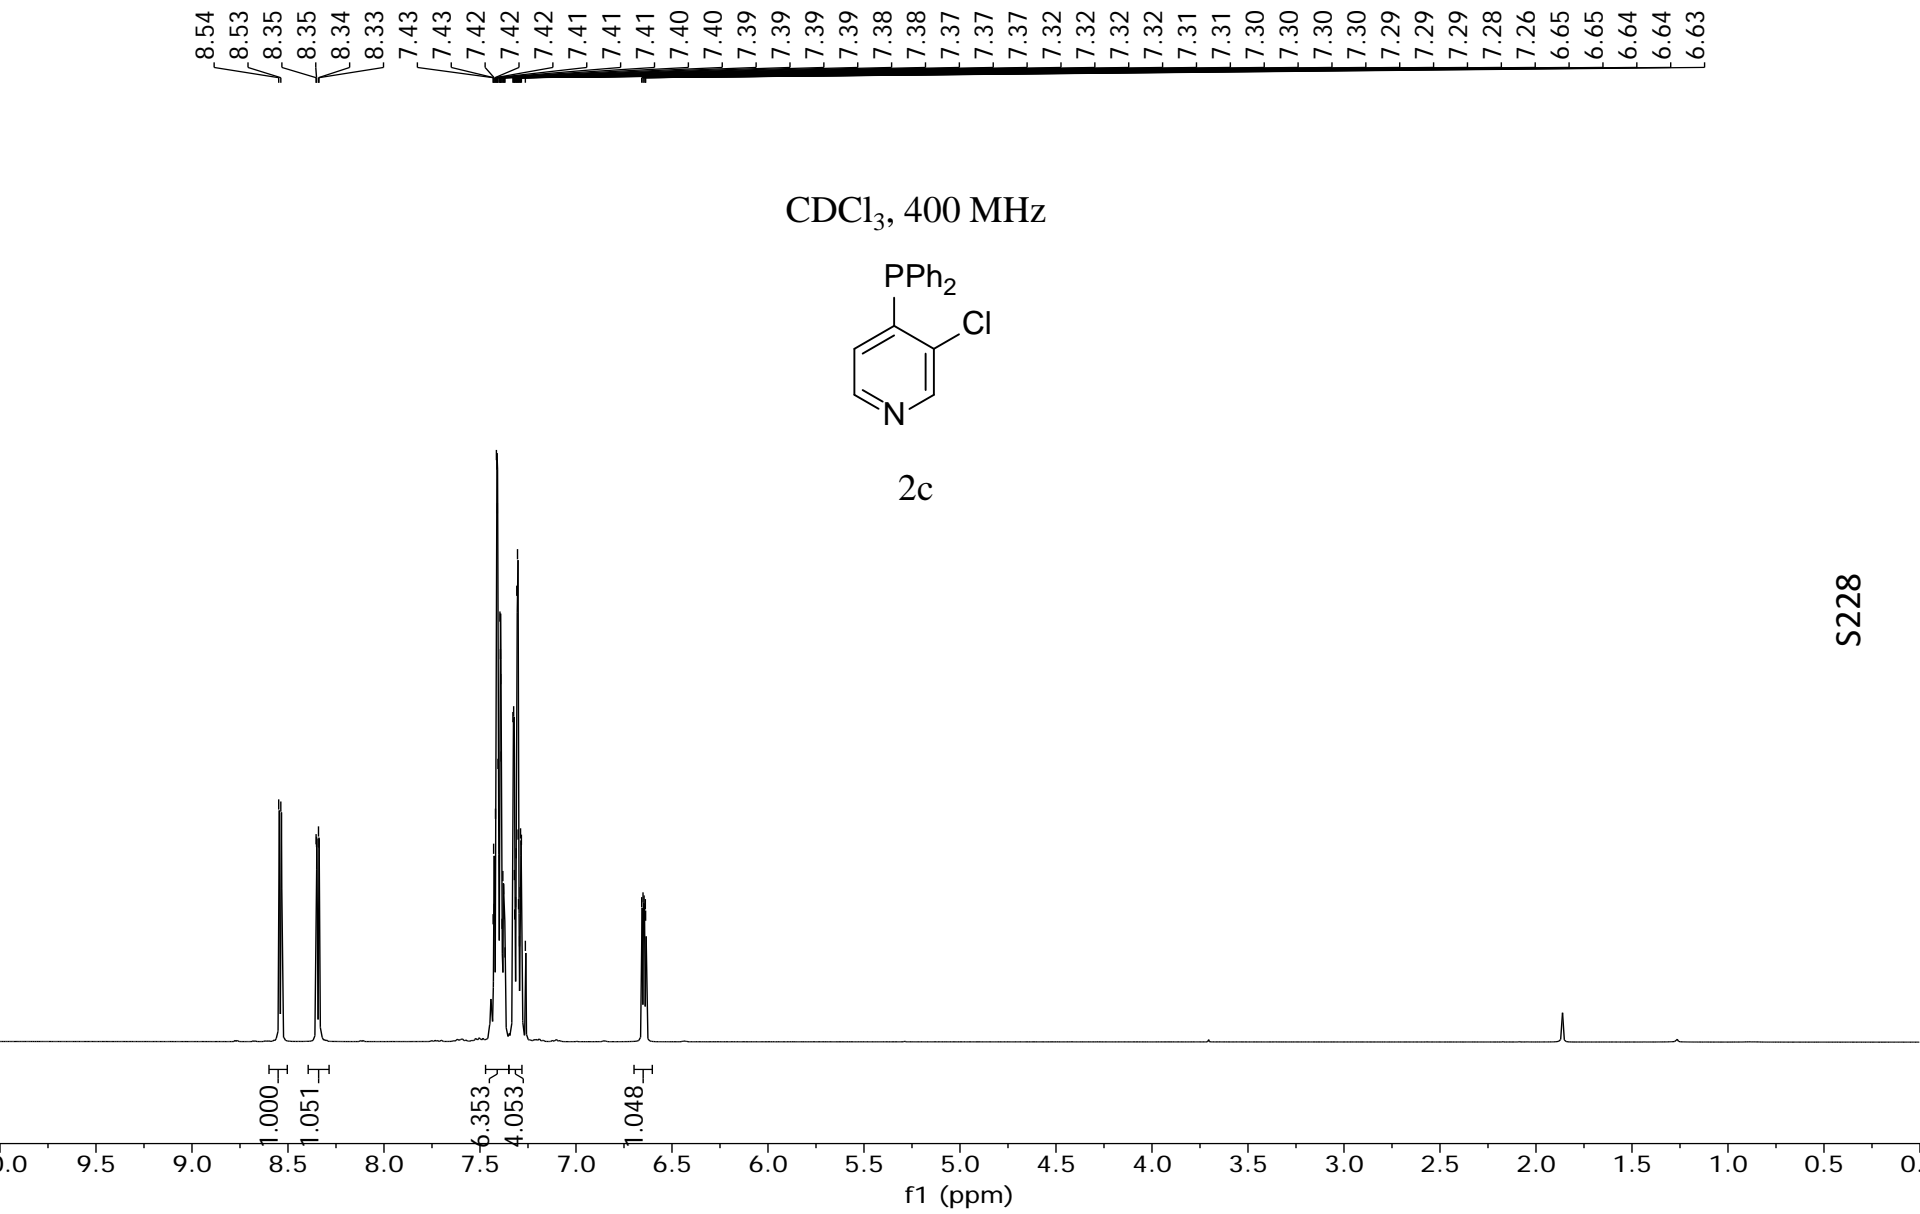

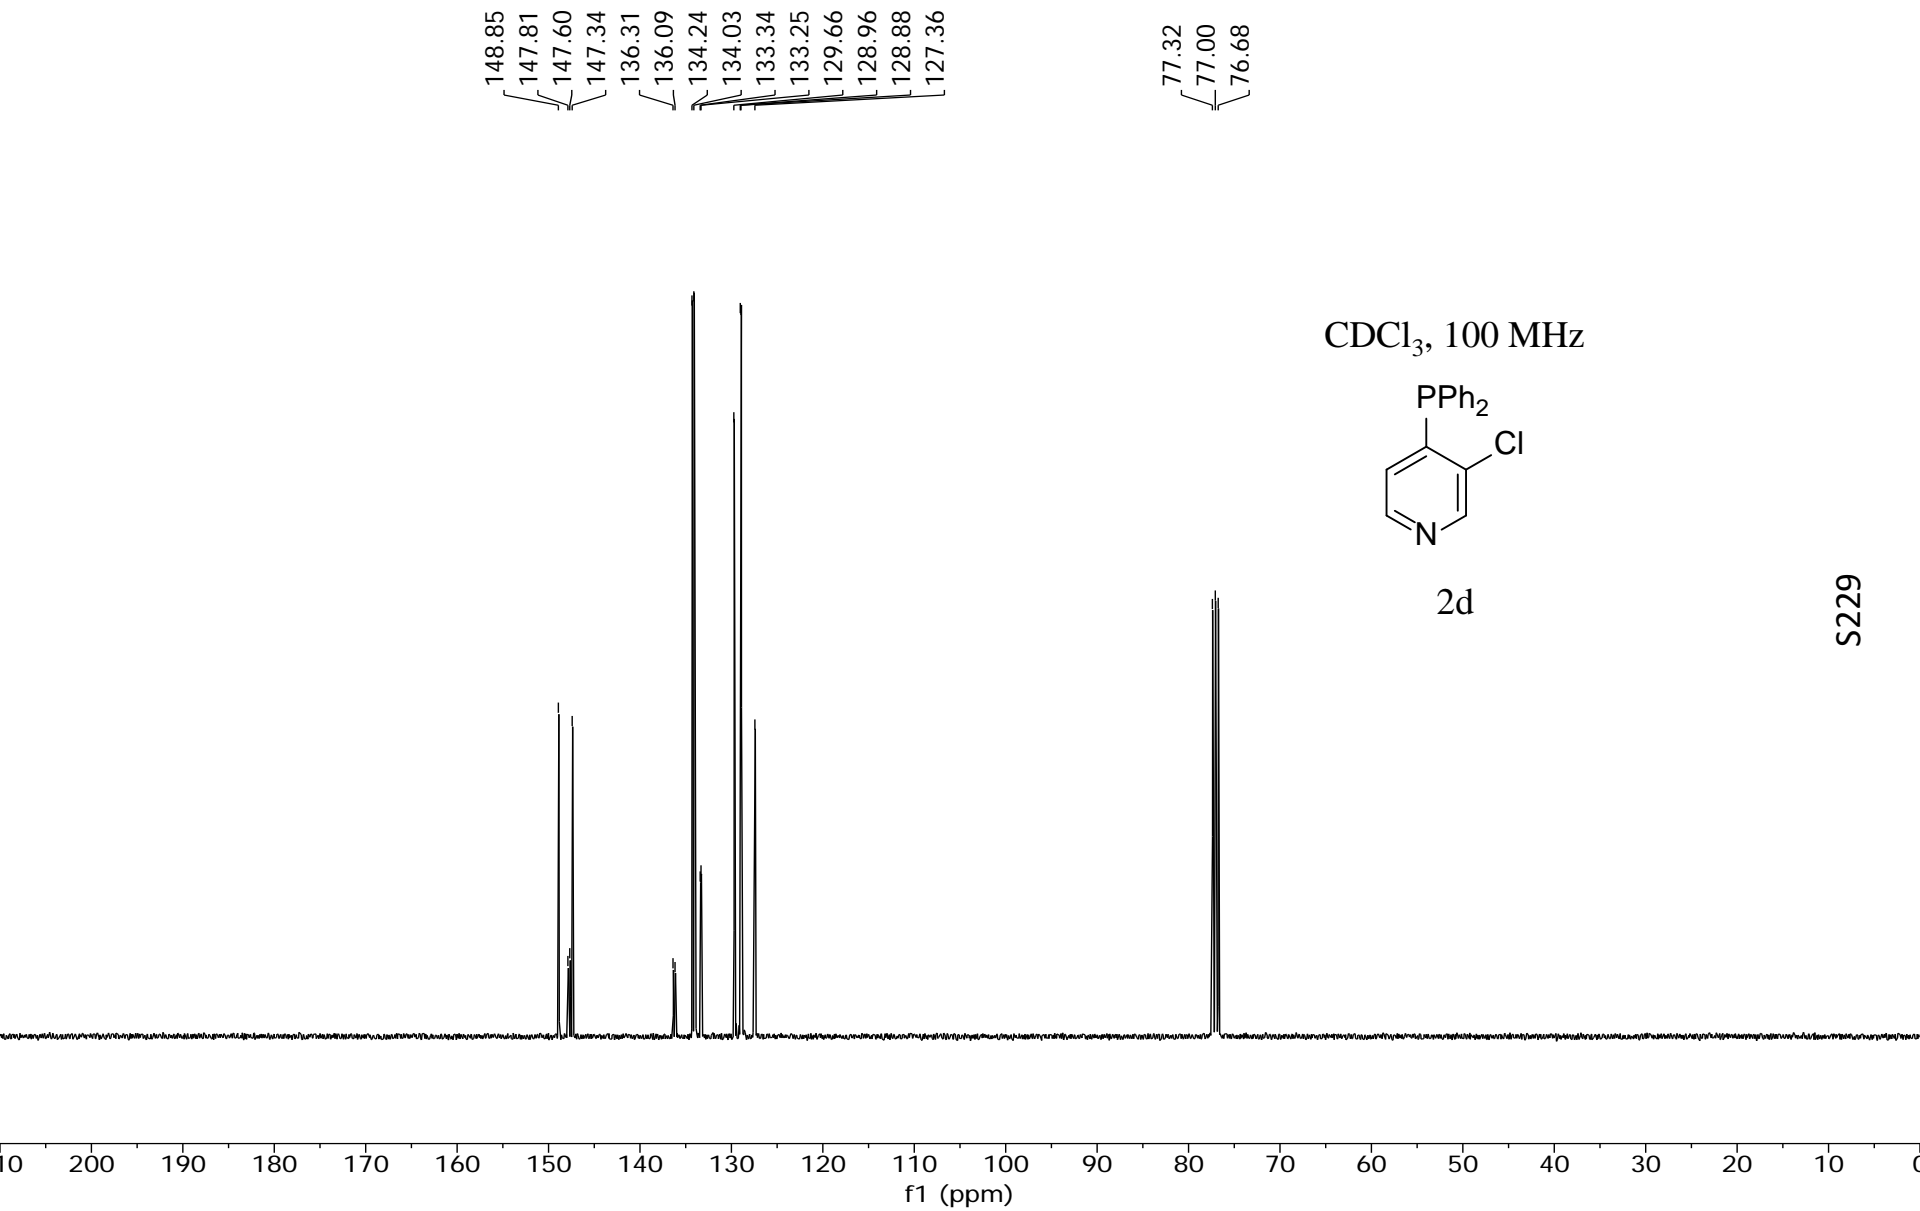

CDCl<sub>3</sub>, 162 MHz

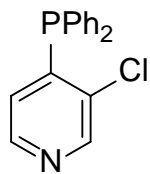

2d

-11.94

S230

50 140 130 120 110 100 90 80 70 60 50 40 30 20 10 0 -10 -20 -30 -40 -50  
f1 (ppm)

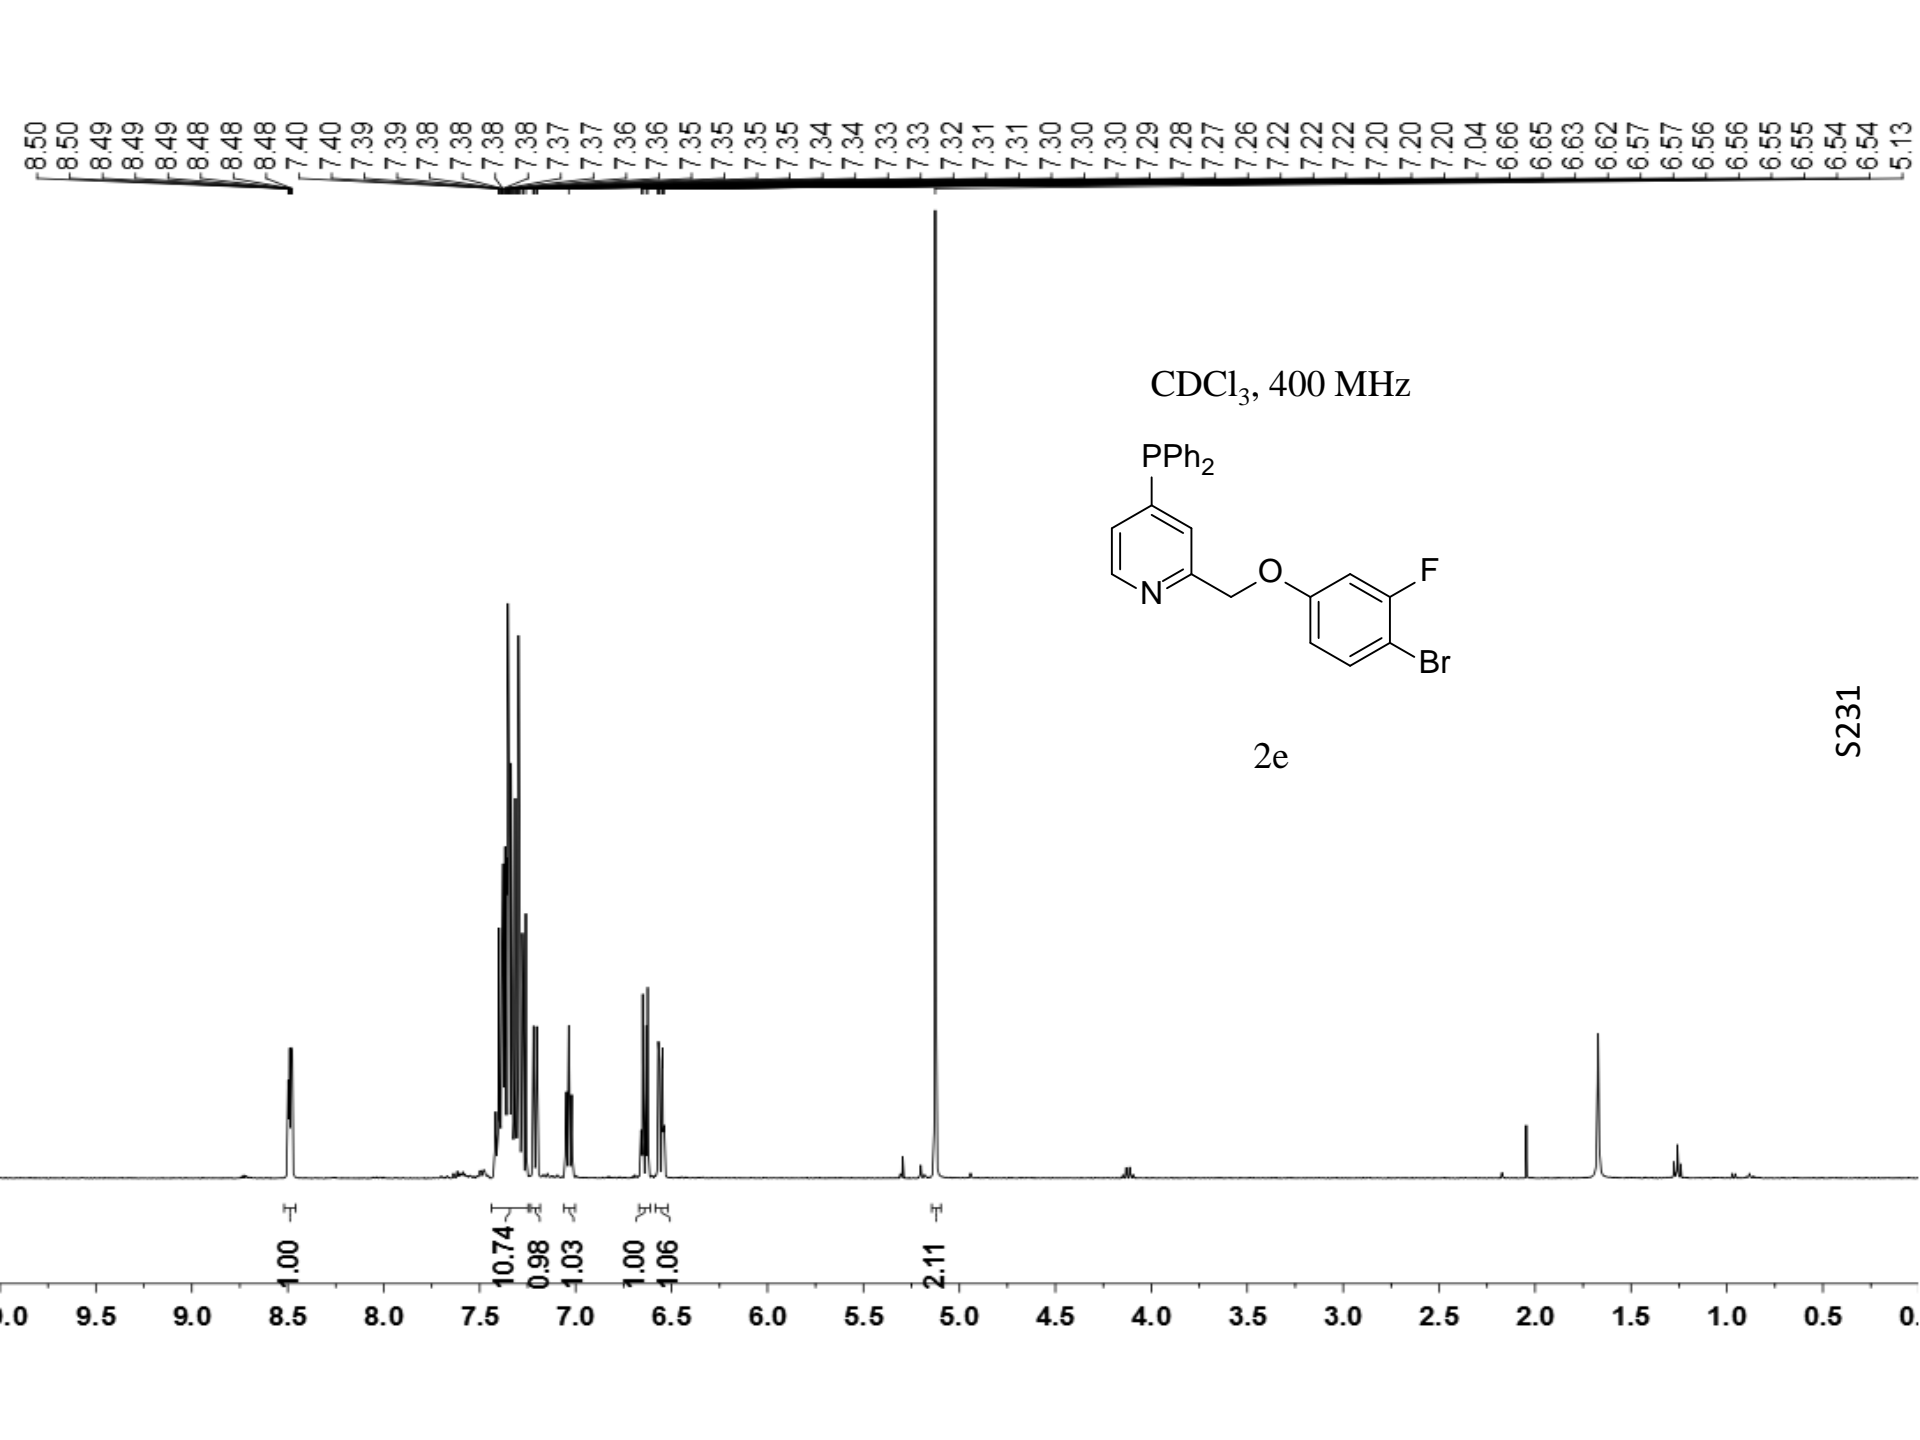

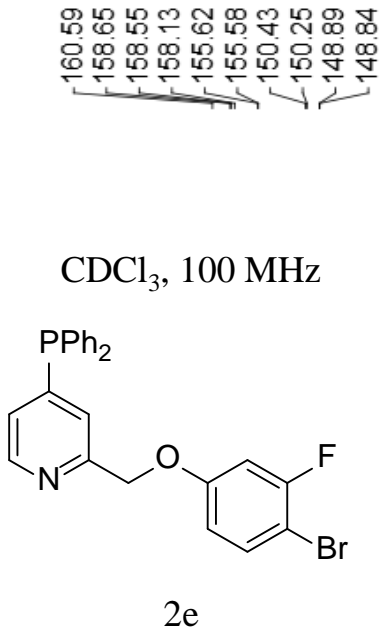

160.59  
158.65  
158.55  
158.13  
155.62  
155.58  
150.43  
150.25  
148.89  
148.84

134.22  
134.02  
133.31  
129.58  
128.85  
128.78  
126.22  
122.02  
111.99  
104.14  
103.89  
99.97  
99.76

77.32  
77.00  
76.68  
70.83

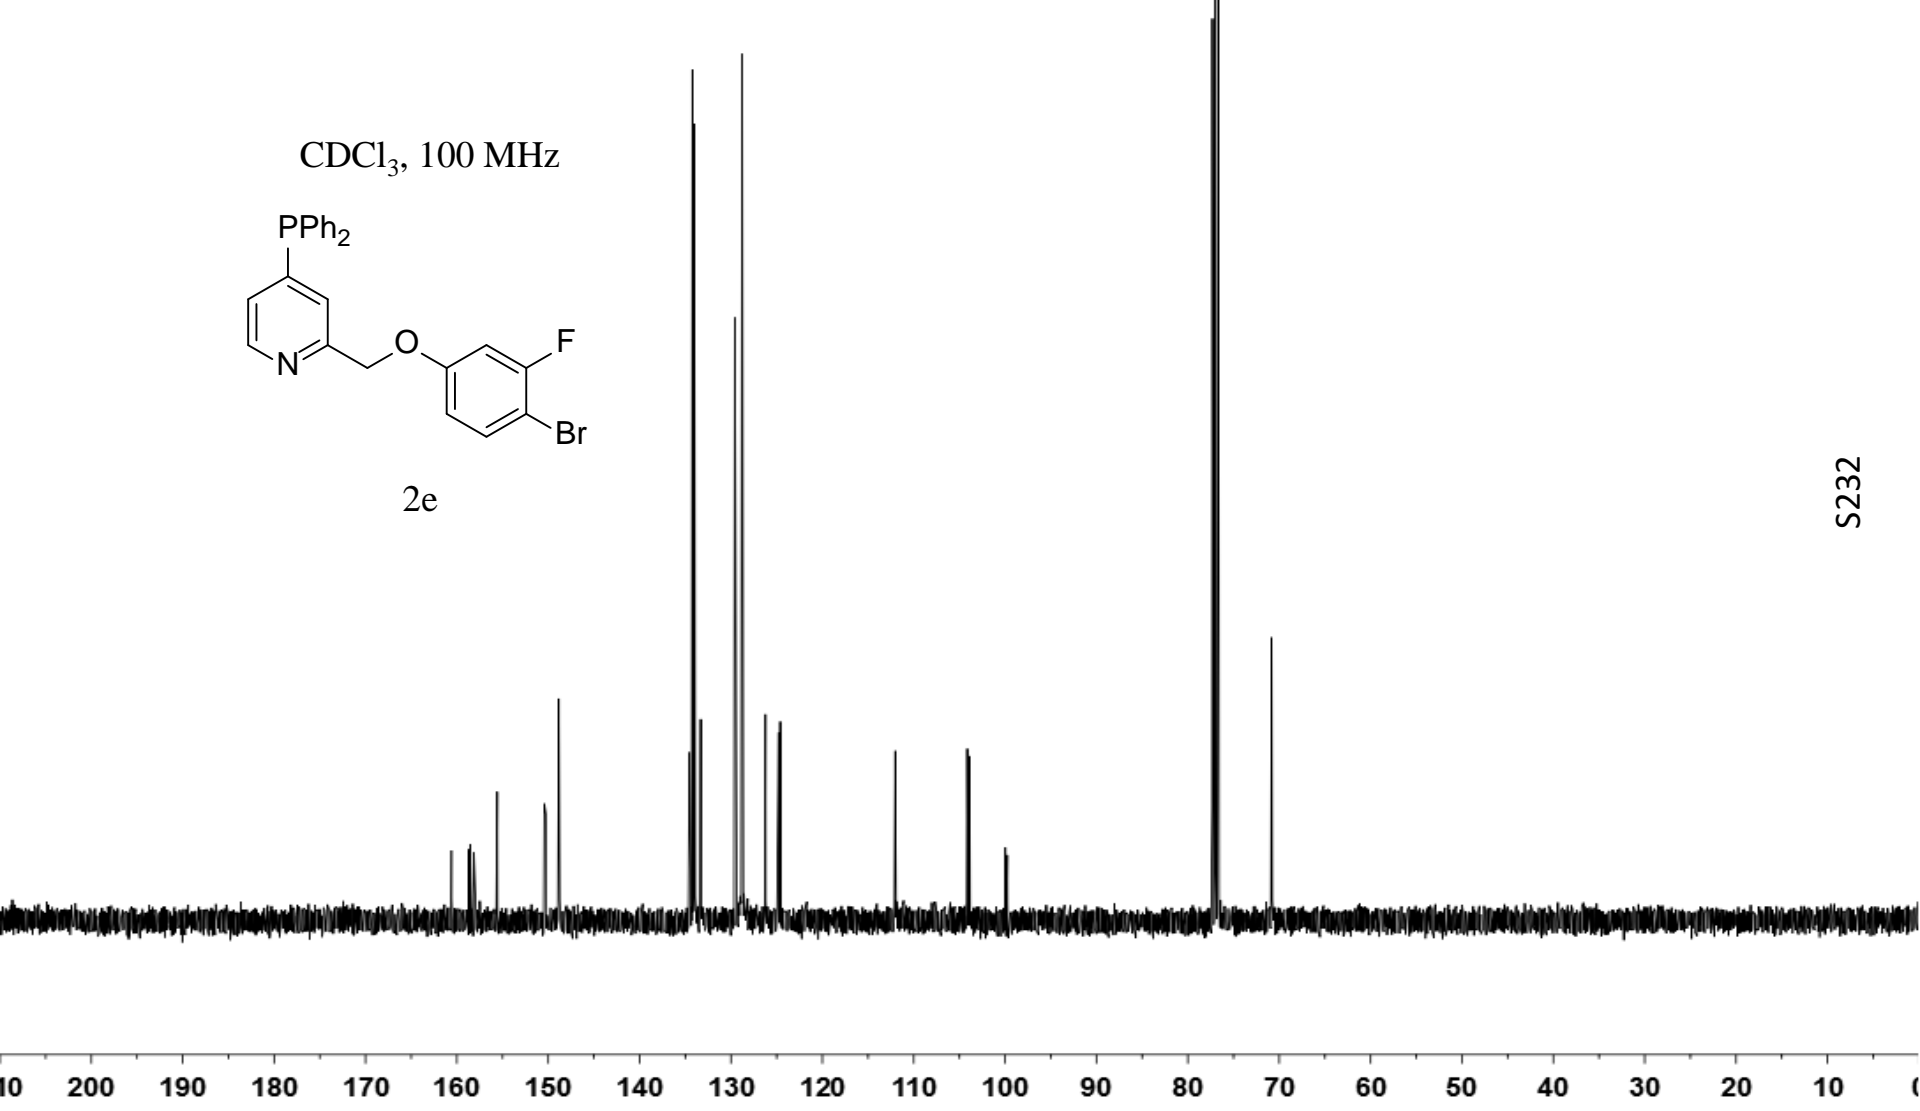



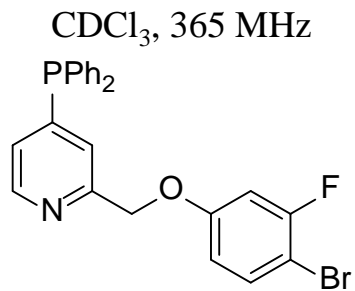

105.01  
105.03  
105.06

S233

CDCl<sub>3</sub>, 162 MHz

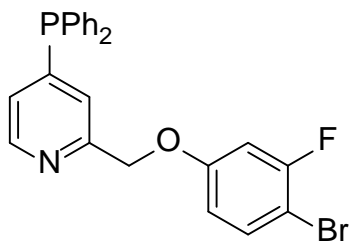

2e

-6.50

S234

160 140 130 120 110 100 90 80 70 60 50 40 30 20 10 0 -10 -20 -30 -40

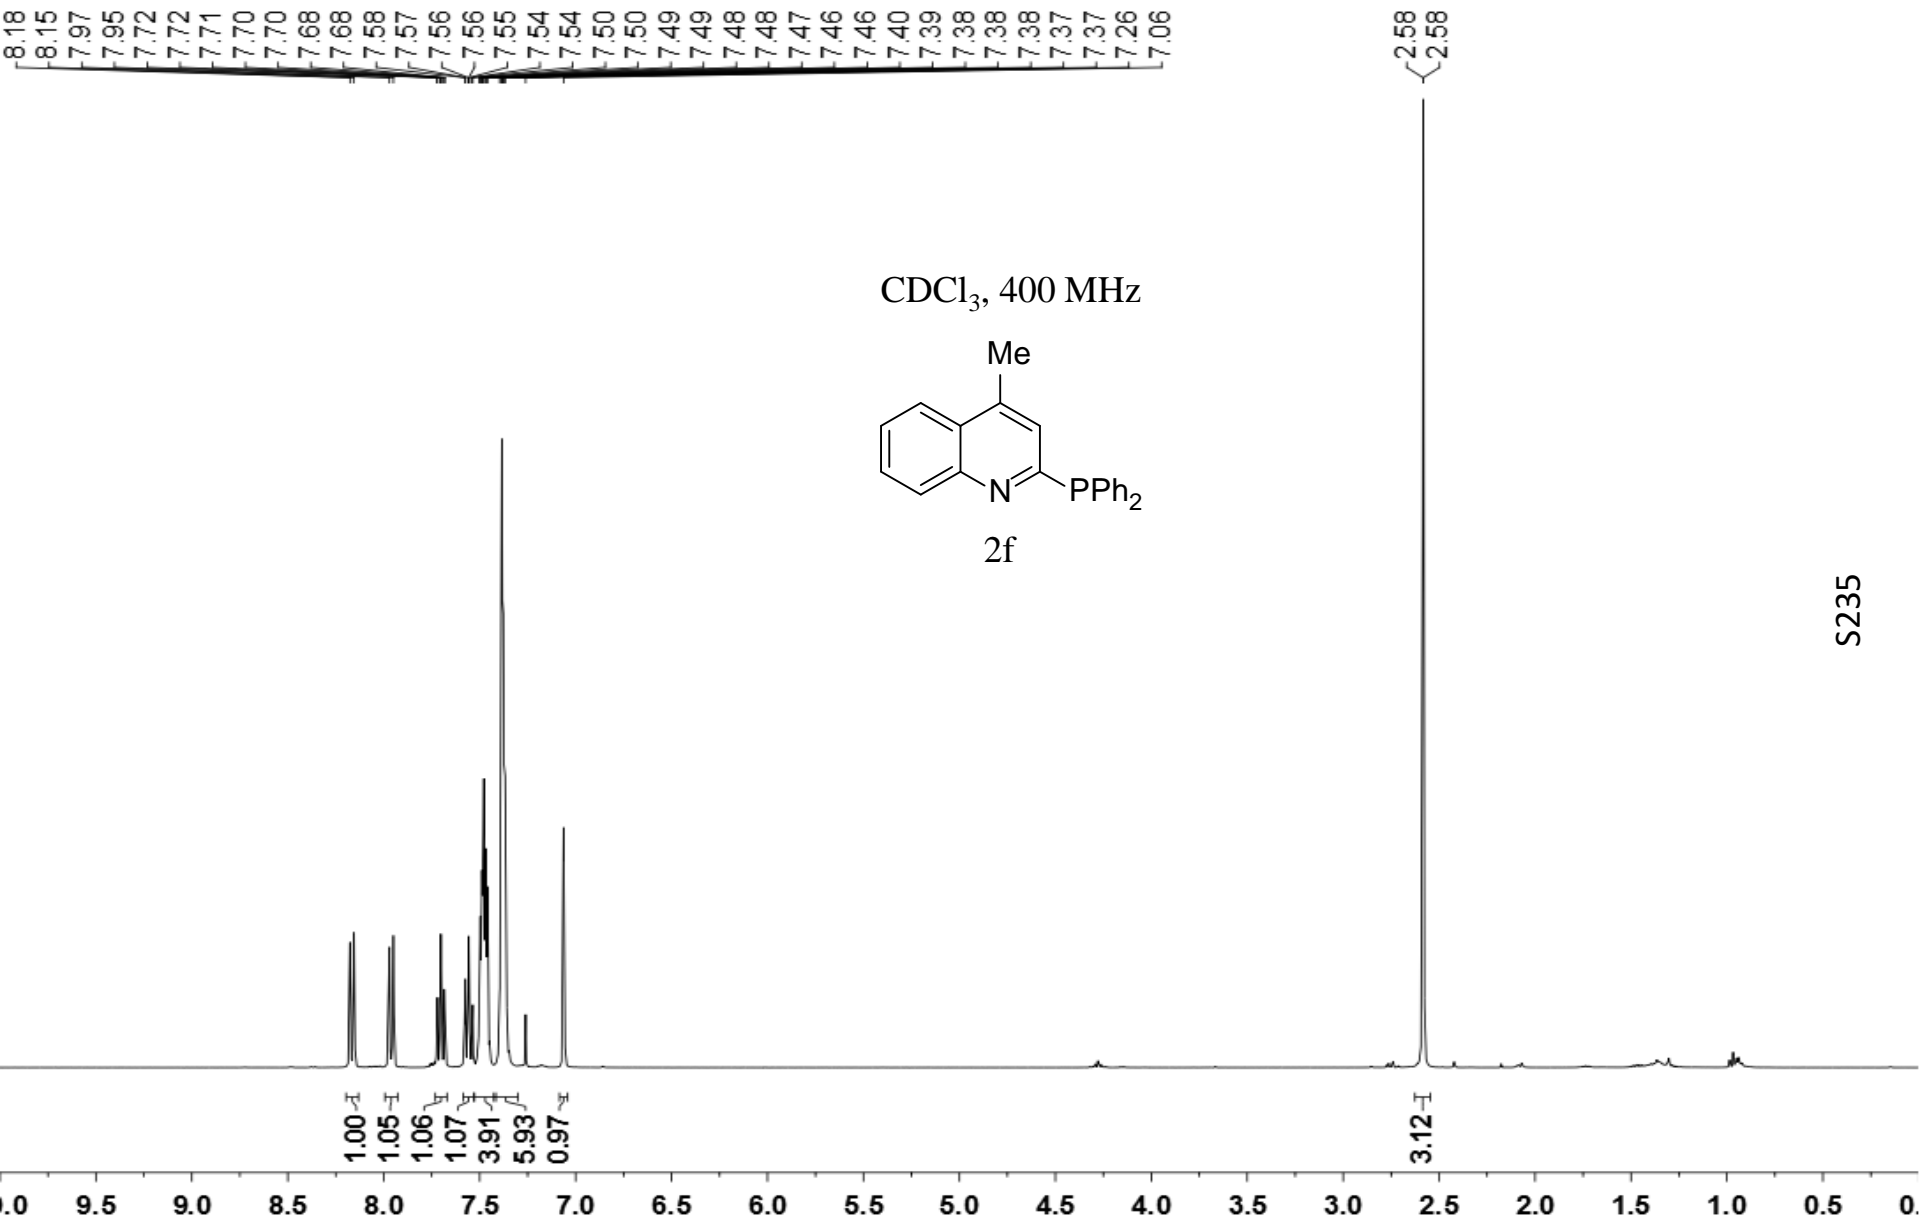

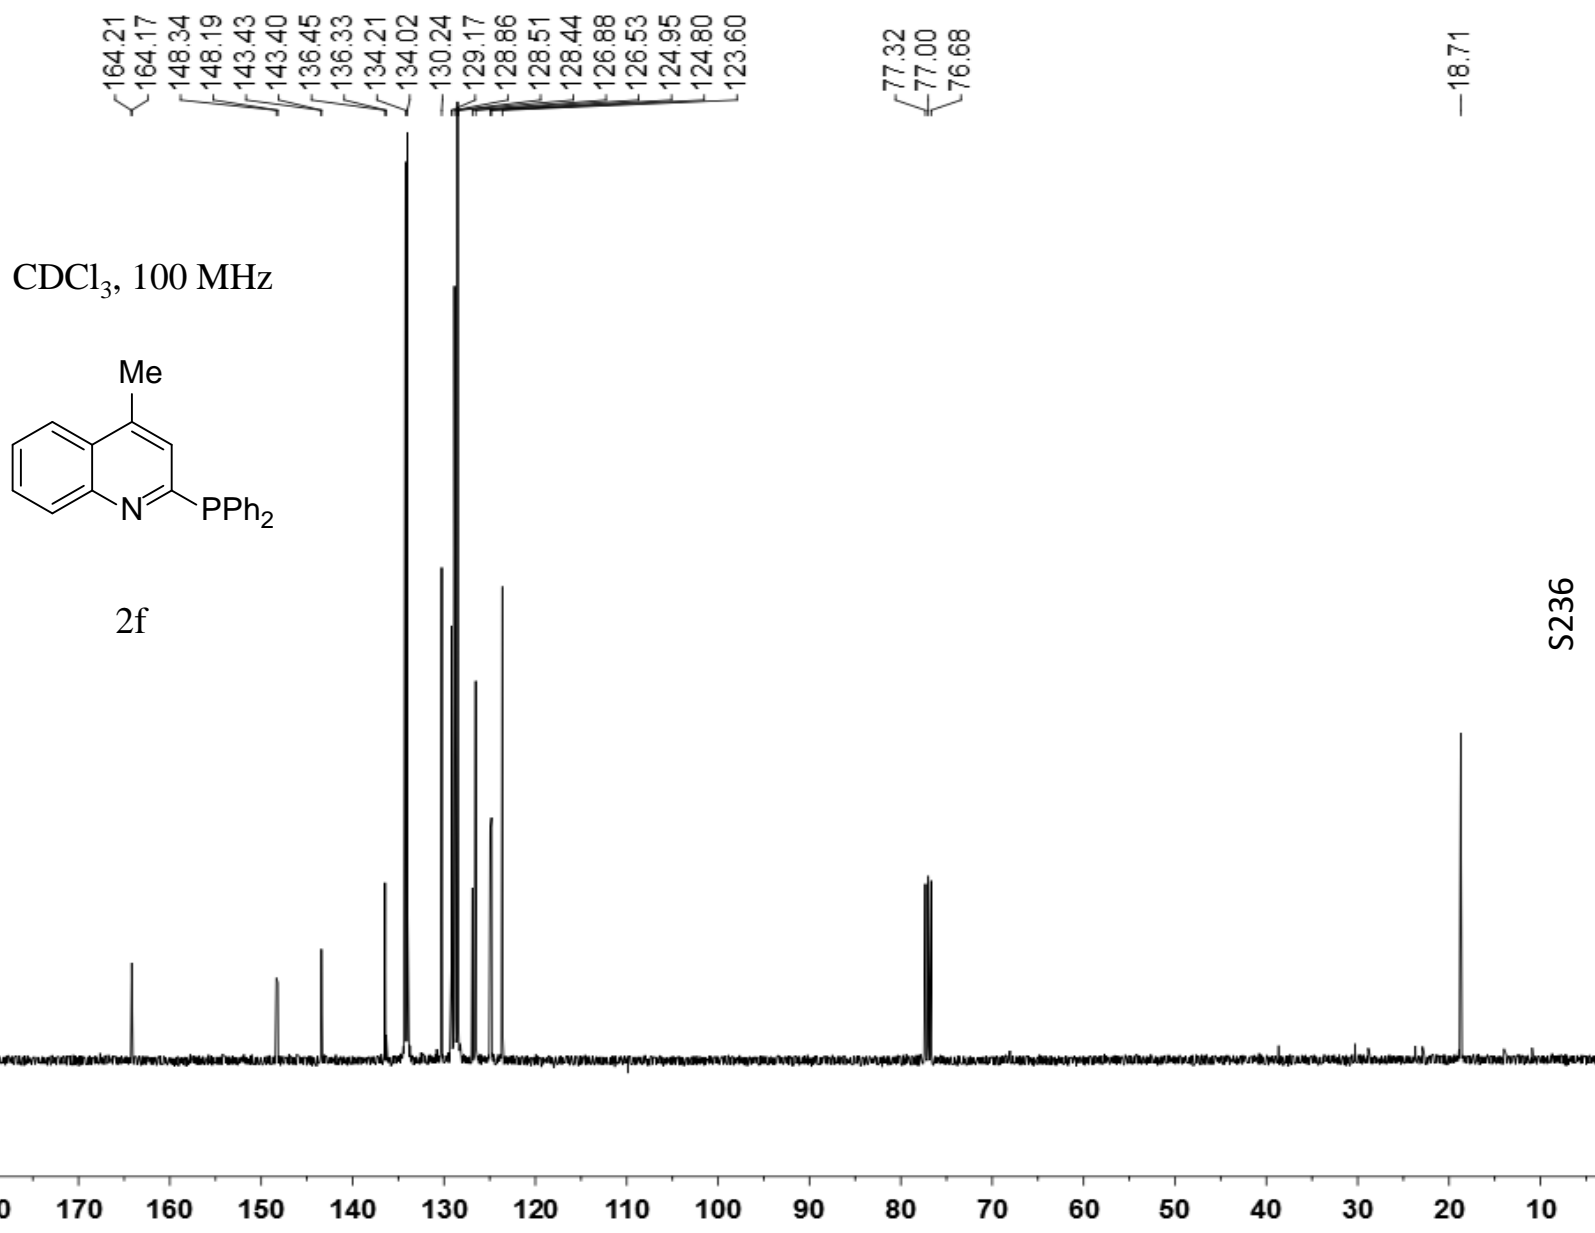

CDCl<sub>3</sub>, 162 MHz

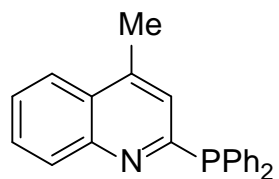

2f

-2.45

S237

50 140 130 120 110 100 90 80 70 60 50 40 30 20 10 0 -10 -20 -30 -40

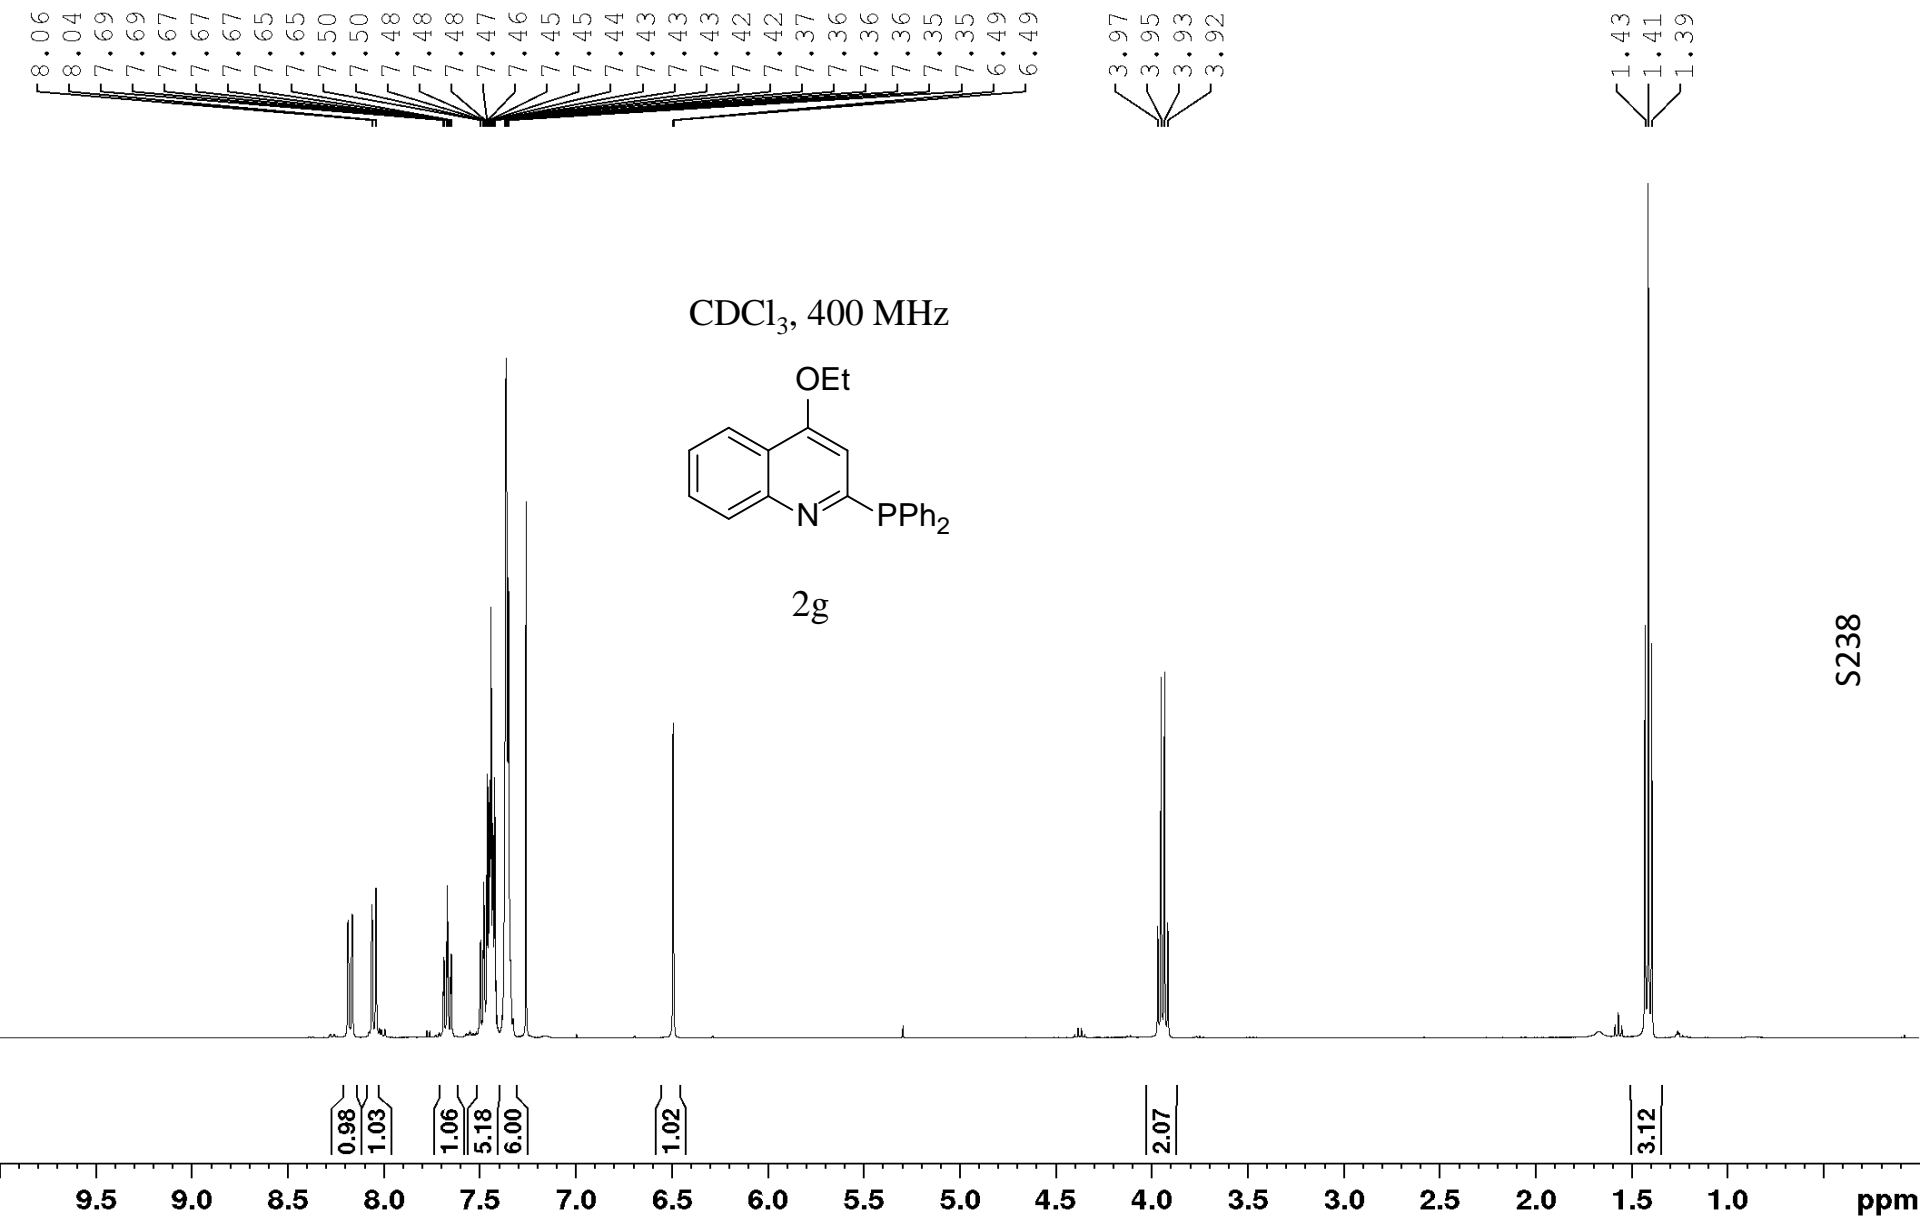

S238

CDCl<sub>3</sub>, 100 MHz

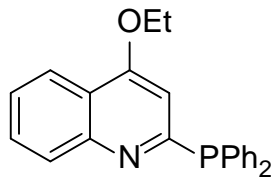

2g

165.62  
165.58  
160.98  
160.94  
149.69  
149.52  
136.62  
136.50  
134.20  
134.00  
129.73  
129.15  
128.92  
128.52  
128.45  
125.72  
121.72  
120.23  
104.10  
103.94

63.69

14.22

S239

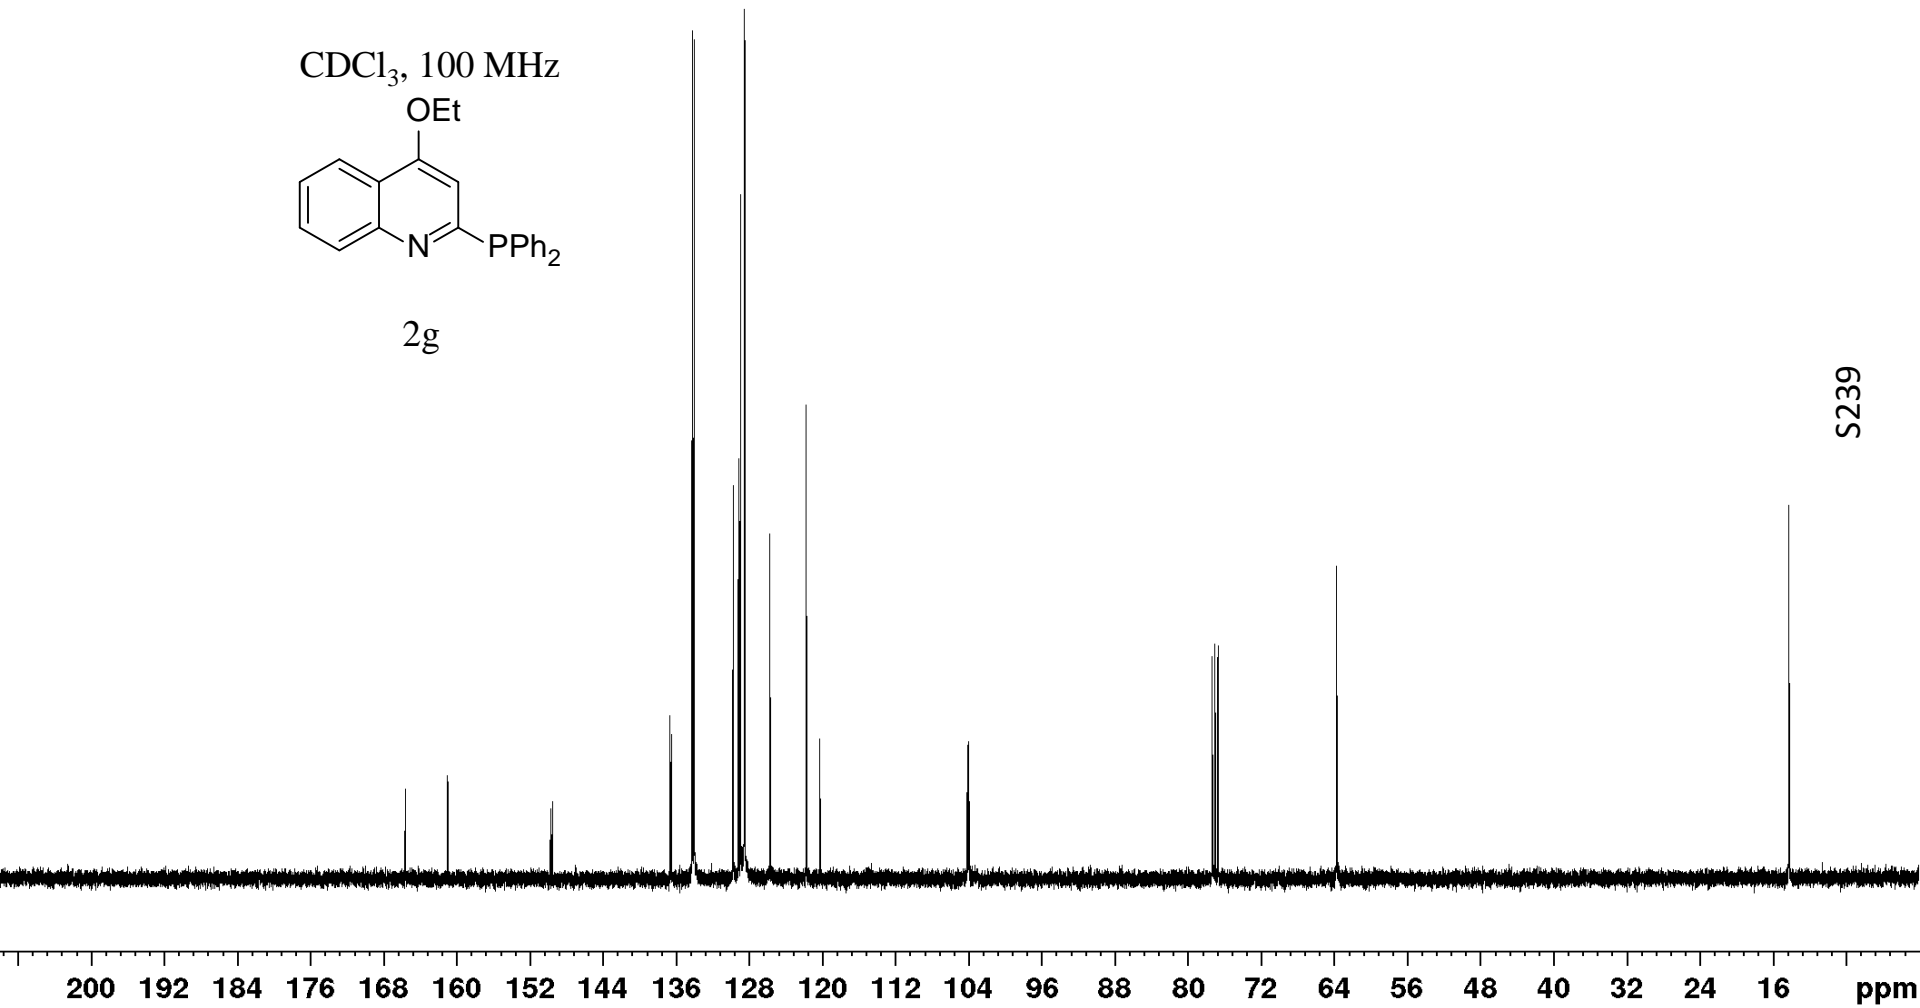

CDCl<sub>3</sub>, 162 MHz

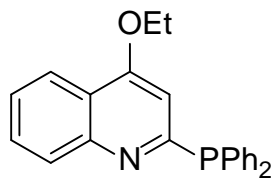

2g

— -1.06

S240

130 120 110 100 90 80 70 60 50 40 30 20 10 0 -10 -20 -30 ppm



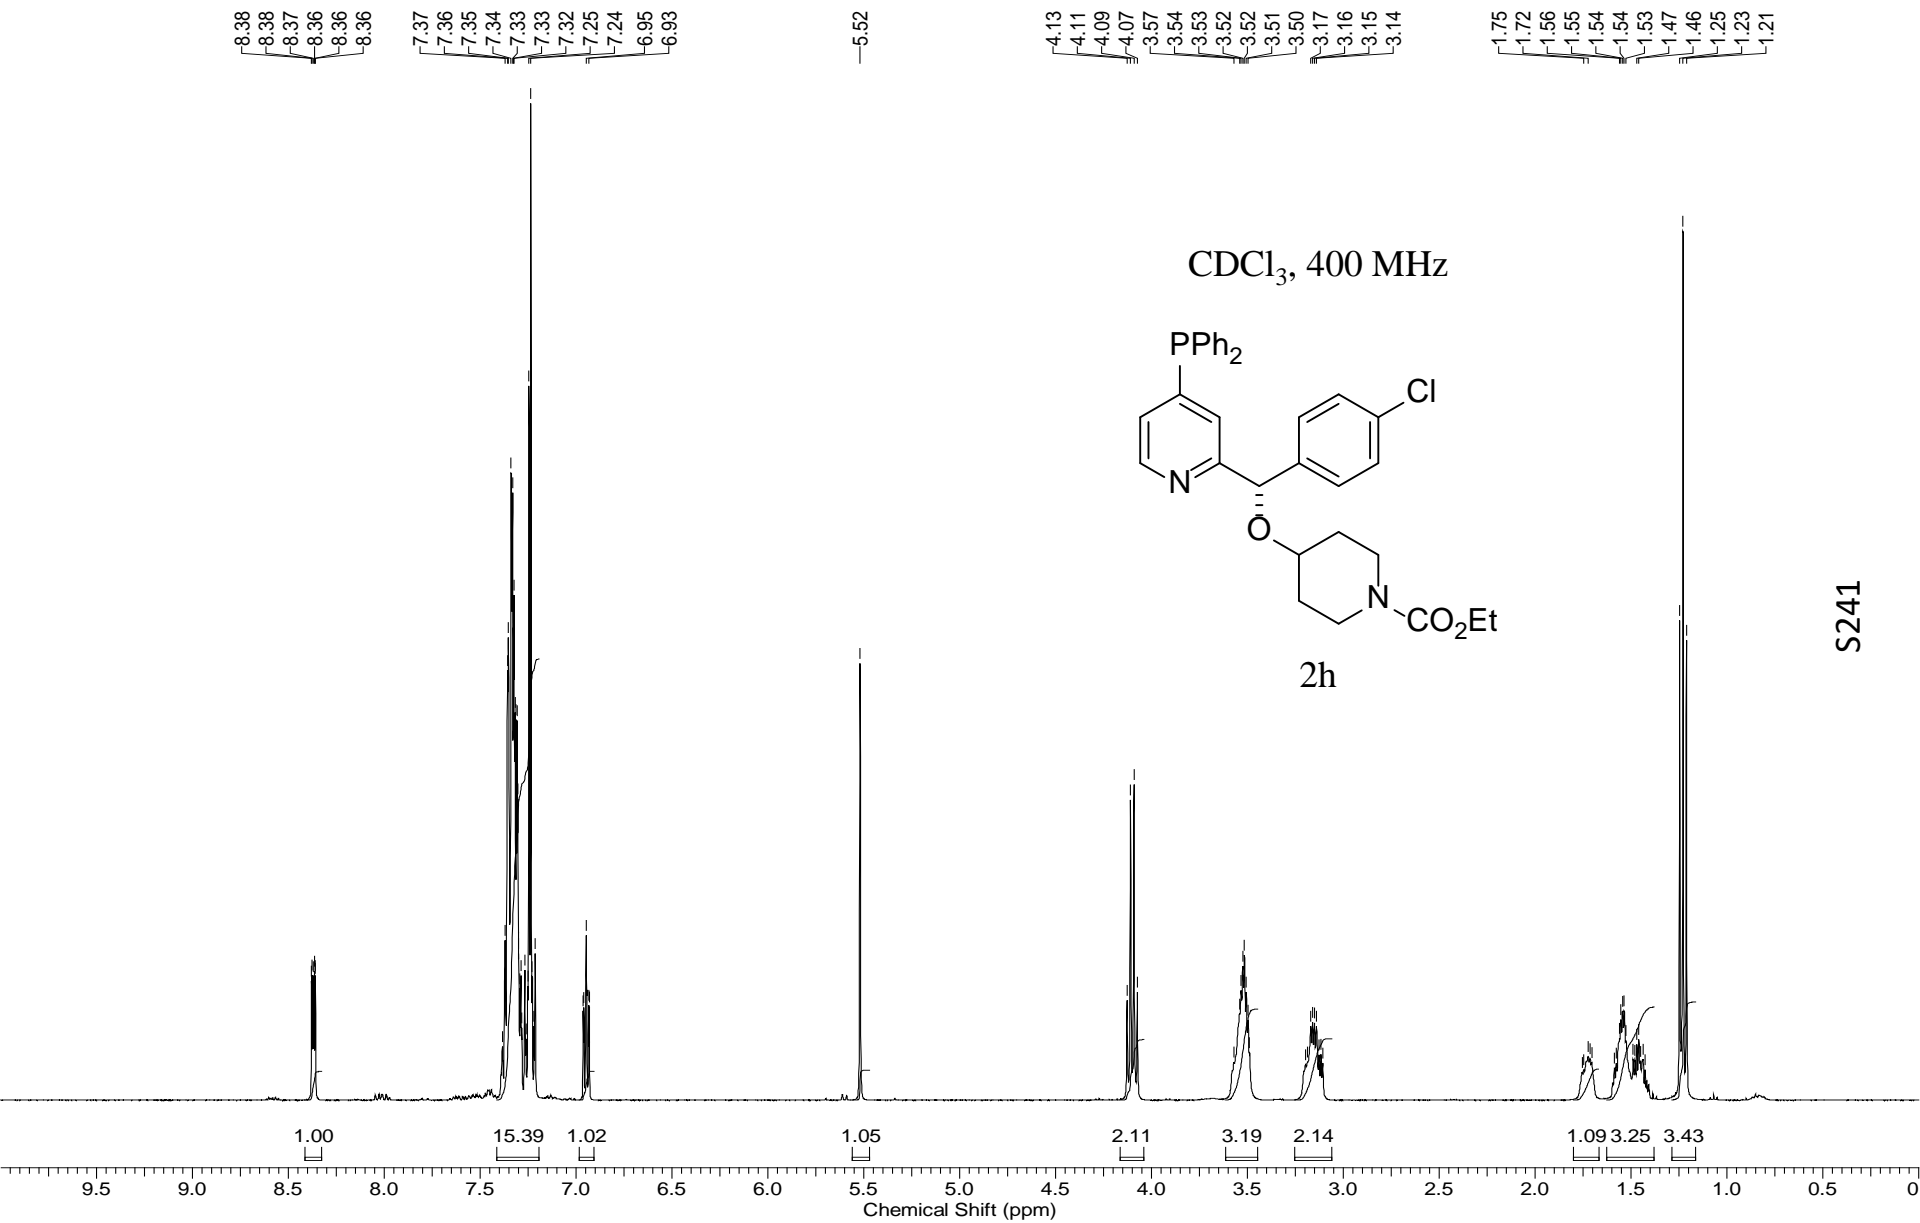

S241

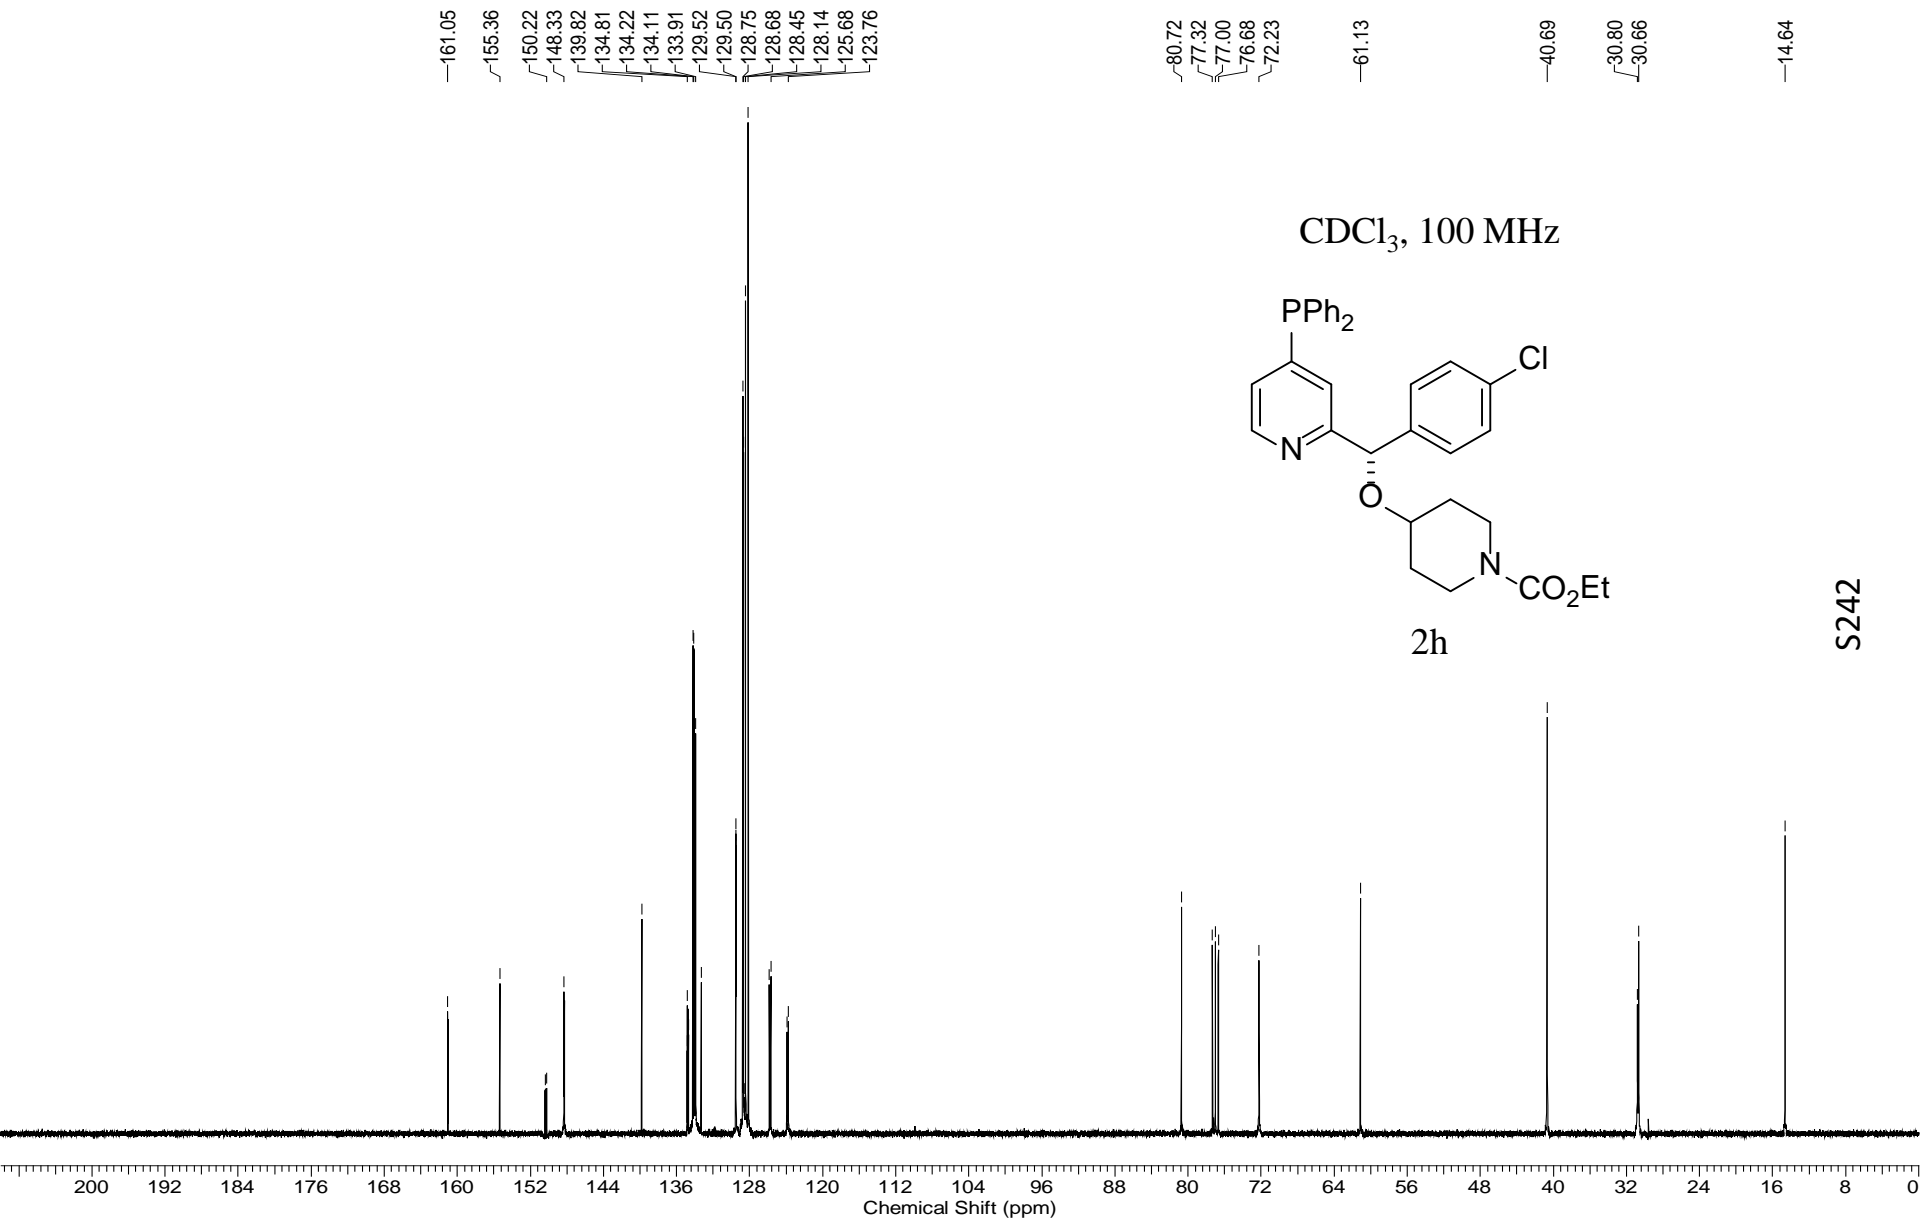

161.05  
155.36  
150.22  
148.33  
139.82  
134.81  
134.22  
134.11  
133.91  
129.52  
129.50  
128.75  
128.68  
128.45  
128.14  
125.68  
123.76

80.72  
77.32  
77.00  
76.68  
72.23

61.13

40.69

30.80  
30.66

14.64

S242

CDCl<sub>3</sub>, 162 MHz

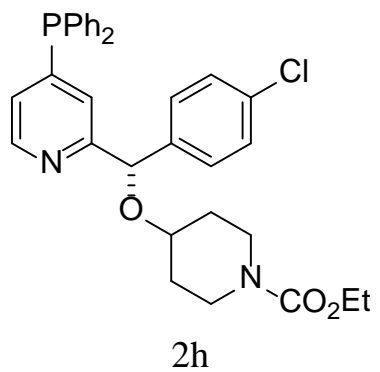

-6.35

S243

144 136 128 120 112 104 96 88 80 72 64 56 48 40 32 24 16 8 0 -8 -16 -24 -32 -40 -48  
Chemical Shift (ppm)

7.95  
7.89  
7.87  
7.50  
7.50  
7.48  
7.48  
7.46  
7.46  
7.35  
7.34  
7.33  
7.31  
7.31  
7.29  
7.28  
7.28  
7.27  
7.27  
7.27  
7.26  
7.25  
7.25  
7.17  
7.16  
7.15  
7.15  
7.15  
7.14  
7.14  
7.07

3.59  
3.33  
3.33  
3.32  
3.31  
3.30  
3.30  
3.29  
3.29  
3.28  
3.27  
3.26  
3.26  
2.38  
2.36  
1.59  
1.57  
1.54  
0.91  
0.89

CDCl<sub>3</sub>, 400 MHz

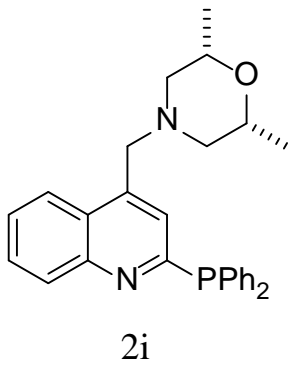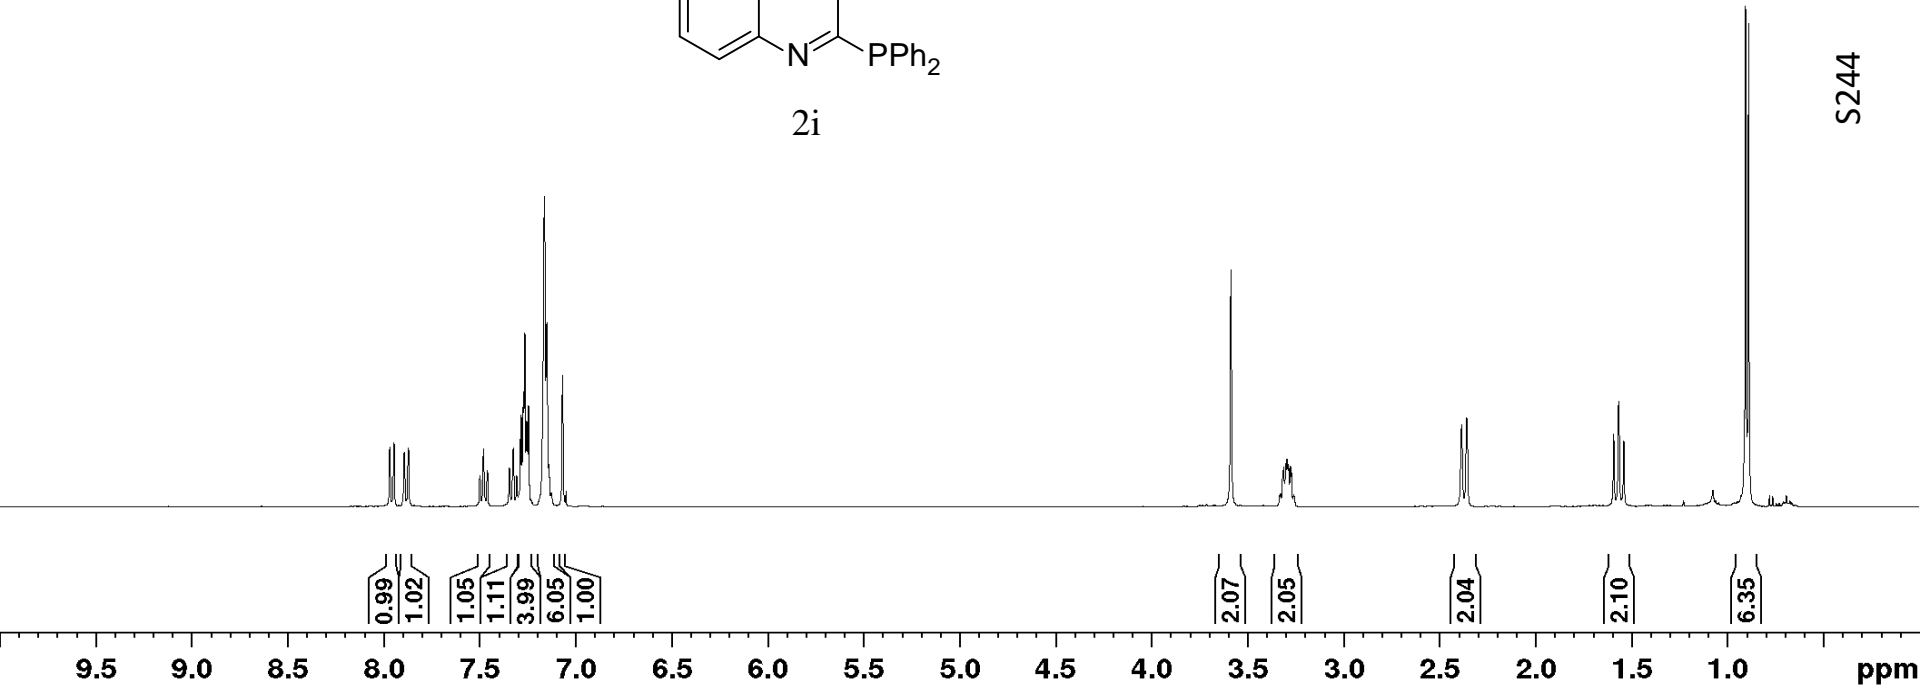

S244

CDCl<sub>3</sub>, 100 MHz

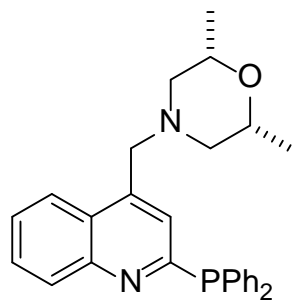

2i

164.40  
164.37  
148.66  
148.51  
142.60  
142.57  
136.44  
136.33  
134.15  
133.95  
130.26  
129.12  
128.90  
128.49  
128.42  
126.54  
125.96  
124.01  
123.87  
123.45

— 71.46

< 59.42  
58.82

— 18.94

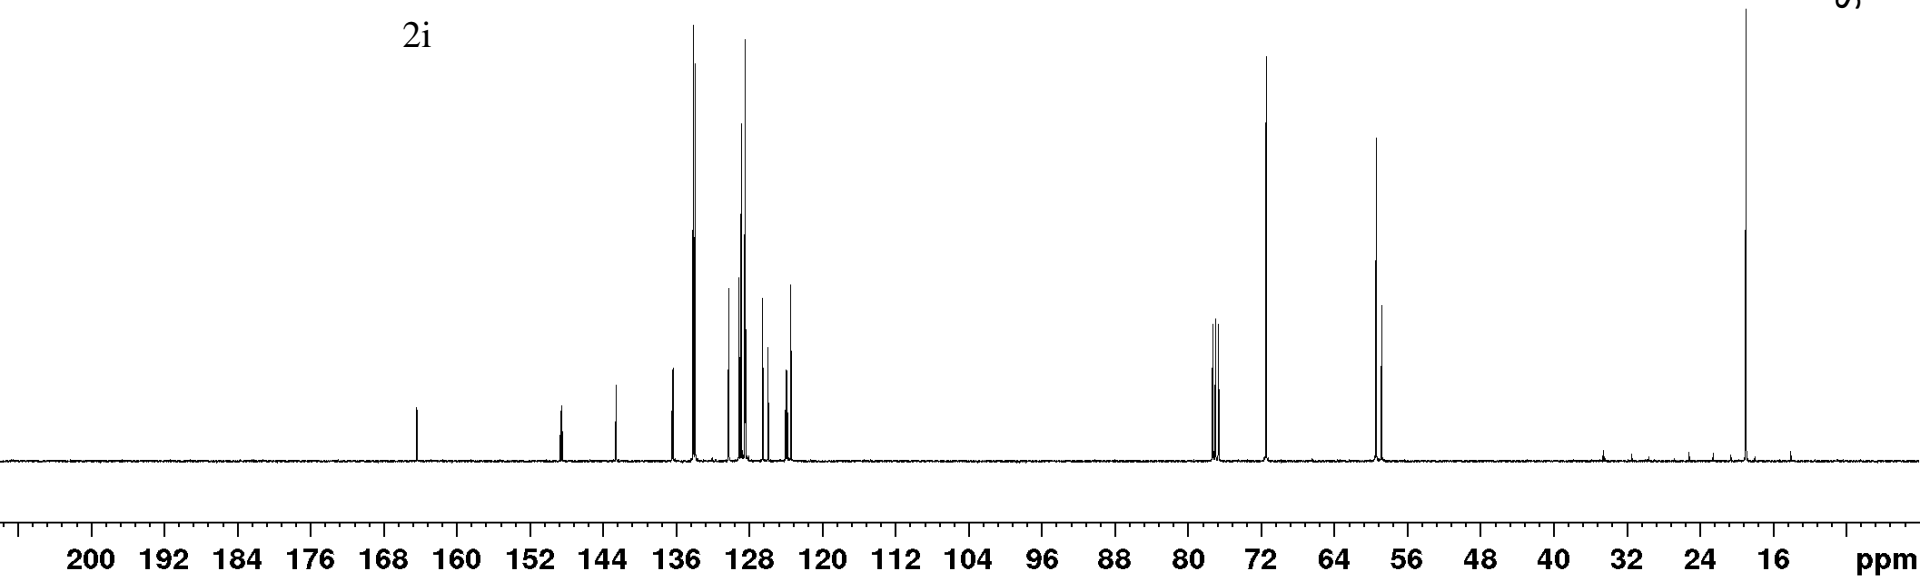

S245

CDCl<sub>3</sub>, 162 MHz

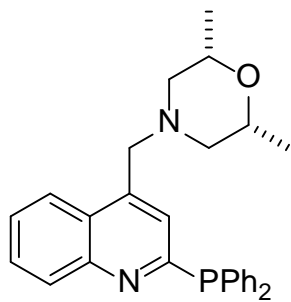

2i

— -2.22

S246

140 130 120 110 100 90 80 70 60 50 40 30 20 10 0 -10 -20 -30 ppm

8.56  
8.55  
8.54  
8.54  
7.83  
7.82  
7.82  
7.82  
7.56  
7.56  
7.55  
7.55  
7.52  
7.50  
7.45  
7.44  
7.38  
7.35  
7.34  
7.34  
7.33  
7.26  
7.01  
7.00  
6.99  
6.98  
6.98

CDCl<sub>3</sub>, 400 MHz

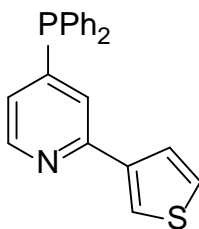

S247

1.00  
0.96  
1.06  
1.08  
9.94  
1.01  
1.01

9.5 9.0 8.5 8.0 7.5 7.0 6.5 6.0 5.5 5.0 4.5 4.0 3.5 3.0 2.5 2.0 1.5 1.0 ppm

CDCl<sub>3</sub>, 100 MHz

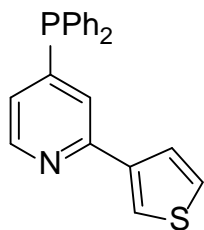

152.86  
152.81  
149.53  
149.35  
149.05  
149.01  
141.75  
134.92  
134.82  
134.19  
133.99  
129.45  
128.80  
128.72  
126.22  
126.07  
125.24  
125.10  
123.92  
123.73

77.31  
77.00  
76.68

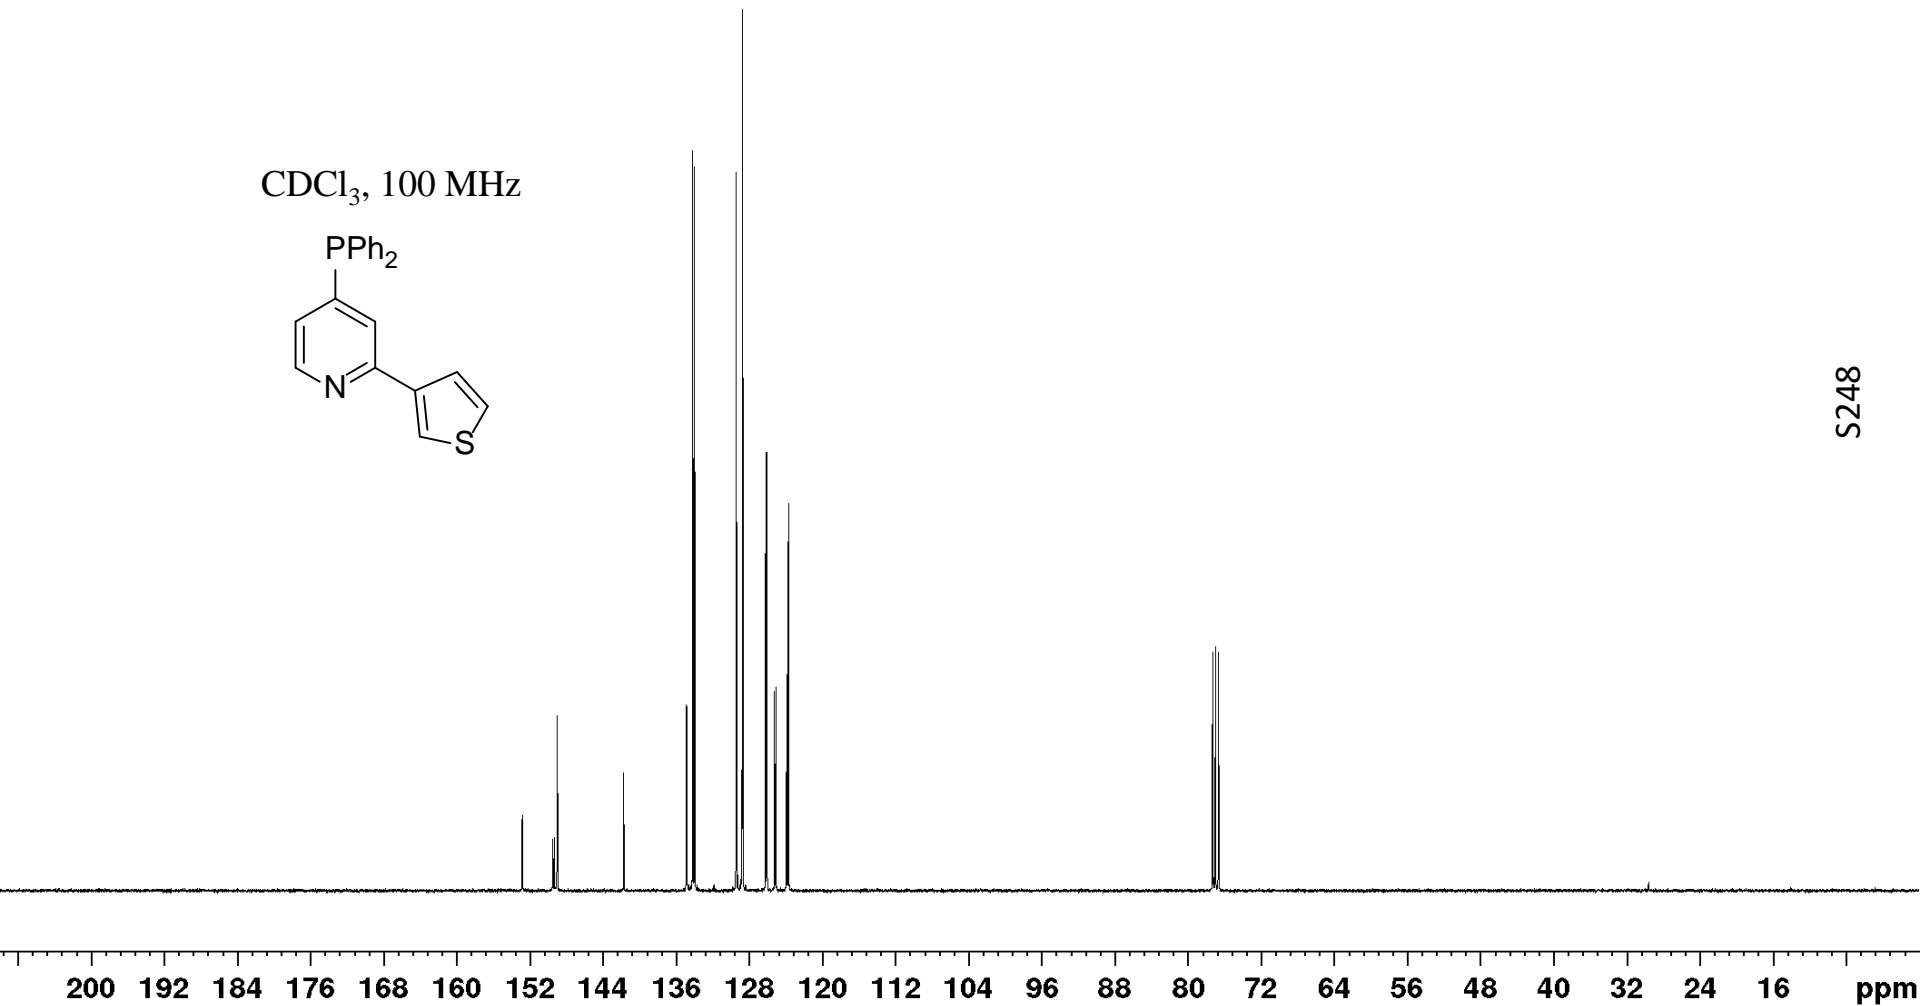



CDCl<sub>3</sub>, 162 MHz

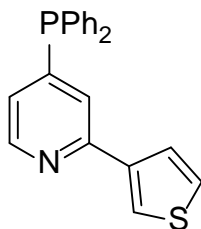

— -6.67

S249

140 130 120 110 100 90 80 70 60 50 40 30 20 10 0 -10 -20 -30 ppm

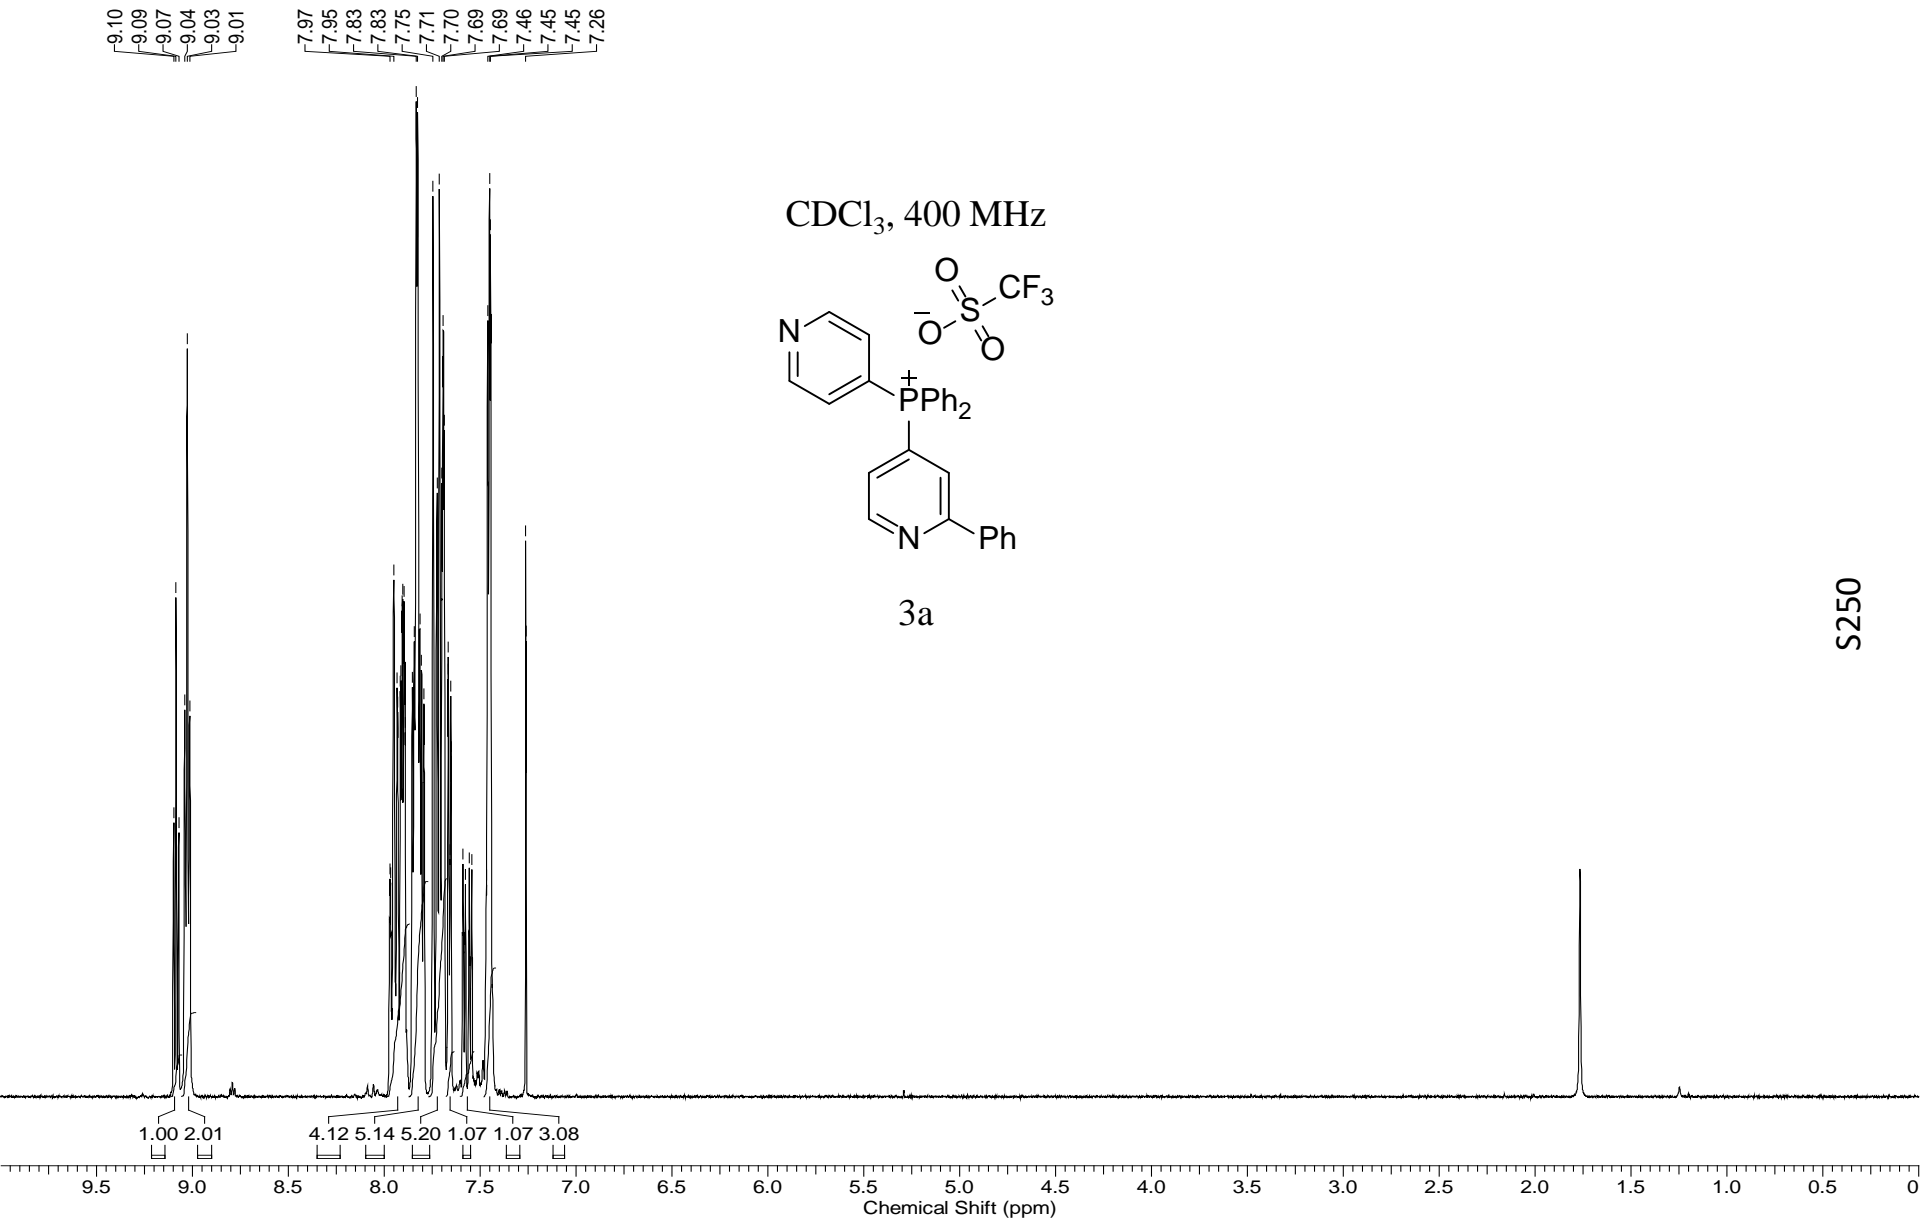

159.04  
158.94  
151.66  
151.54  
151.44  
136.50  
136.48  
136.36  
136.33  
134.34  
134.23  
131.00  
130.87  
130.14  
128.75  
128.58  
128.45  
127.82  
127.02  
126.98  
126.94  
126.89  
126.81  
125.98  
125.22  
125.14  
123.01  
122.92  
121.98  
118.78  
115.59  
114.03  
113.14  
77.32  
77.20  
77.00  
76.68

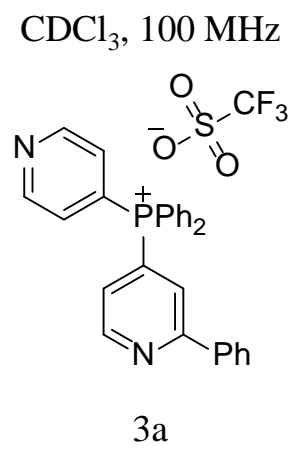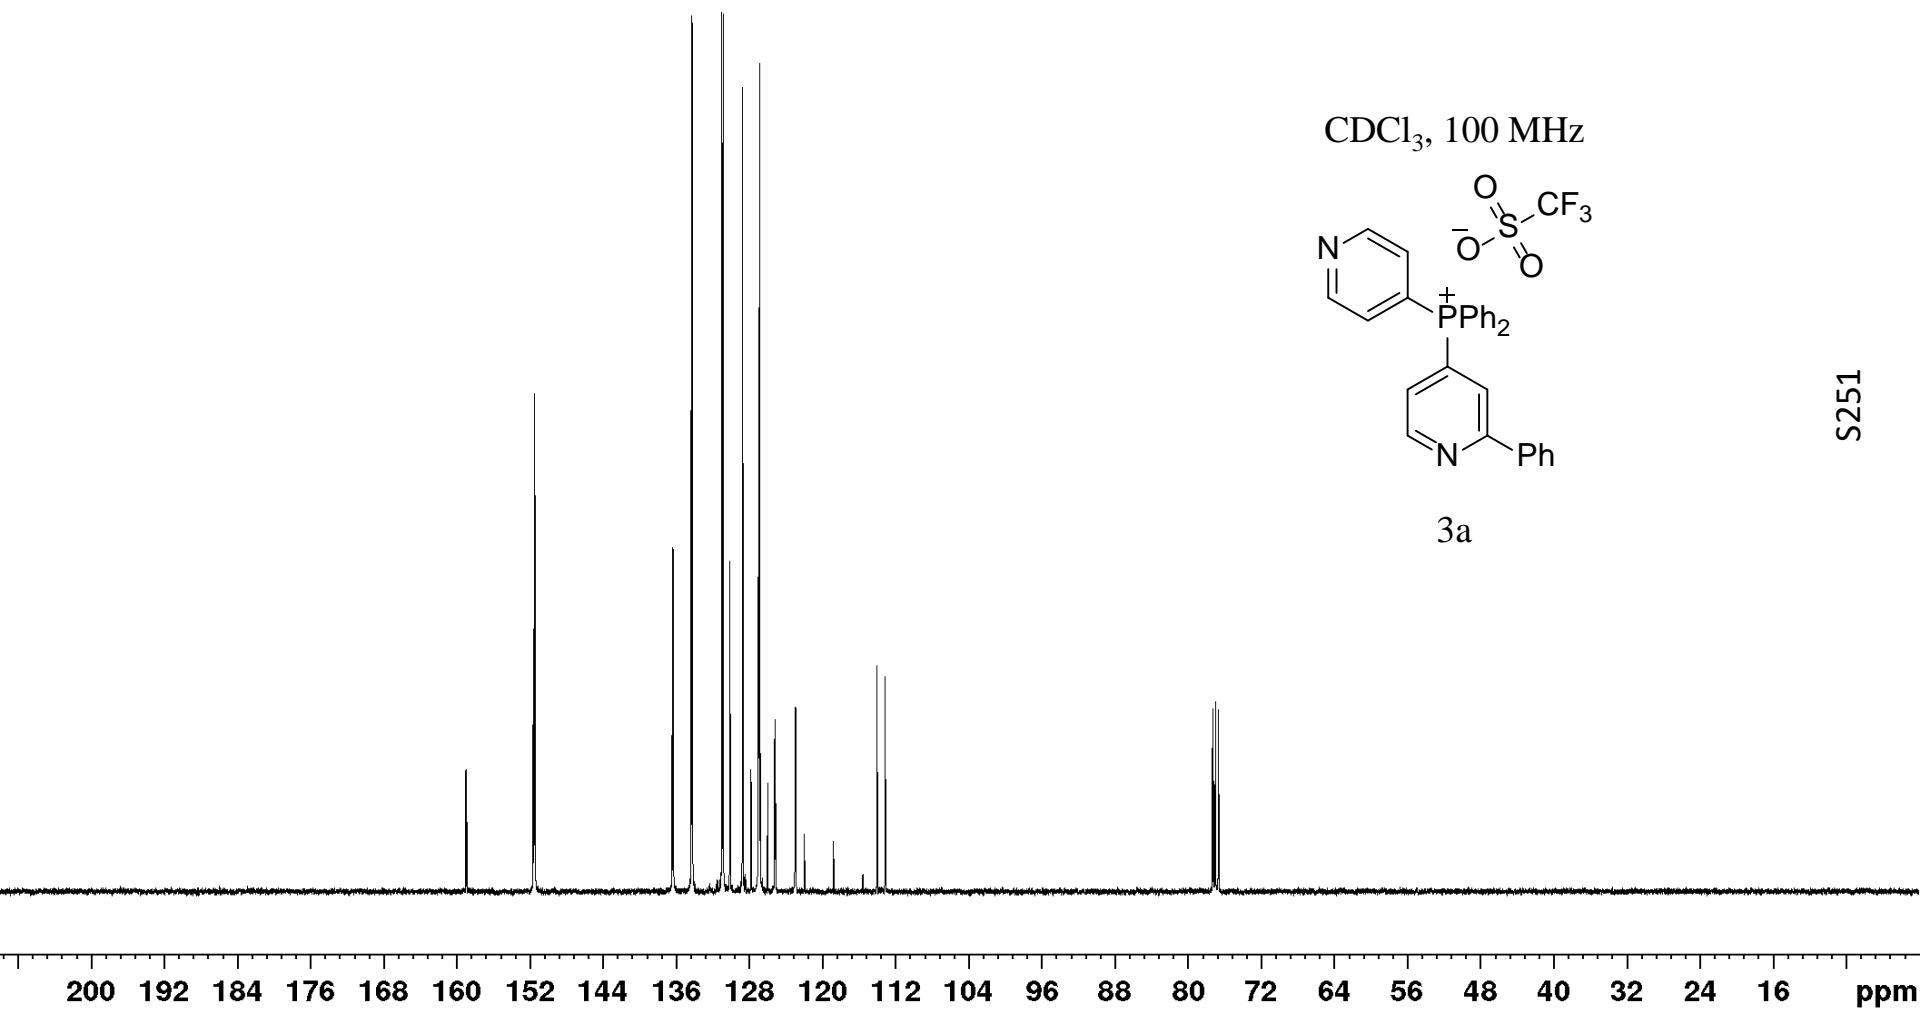

CDCl<sub>3</sub>, 365 MHz

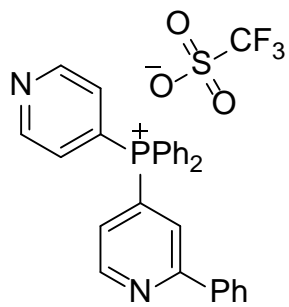

3a

-78.14

0 -10 -20 -30 -40 -50 -60 -70 -80 -90 -100 -110 -120 -130 -140 -150 -160 -170 -180 ppm

S252

CDCl<sub>3</sub>, 162 MHz

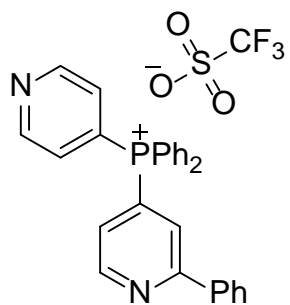

3a

—21.76

S253

140 130 120 110 100 90 80 70 60 50 40 30 20 10 0 -10 -20 -30 ppm

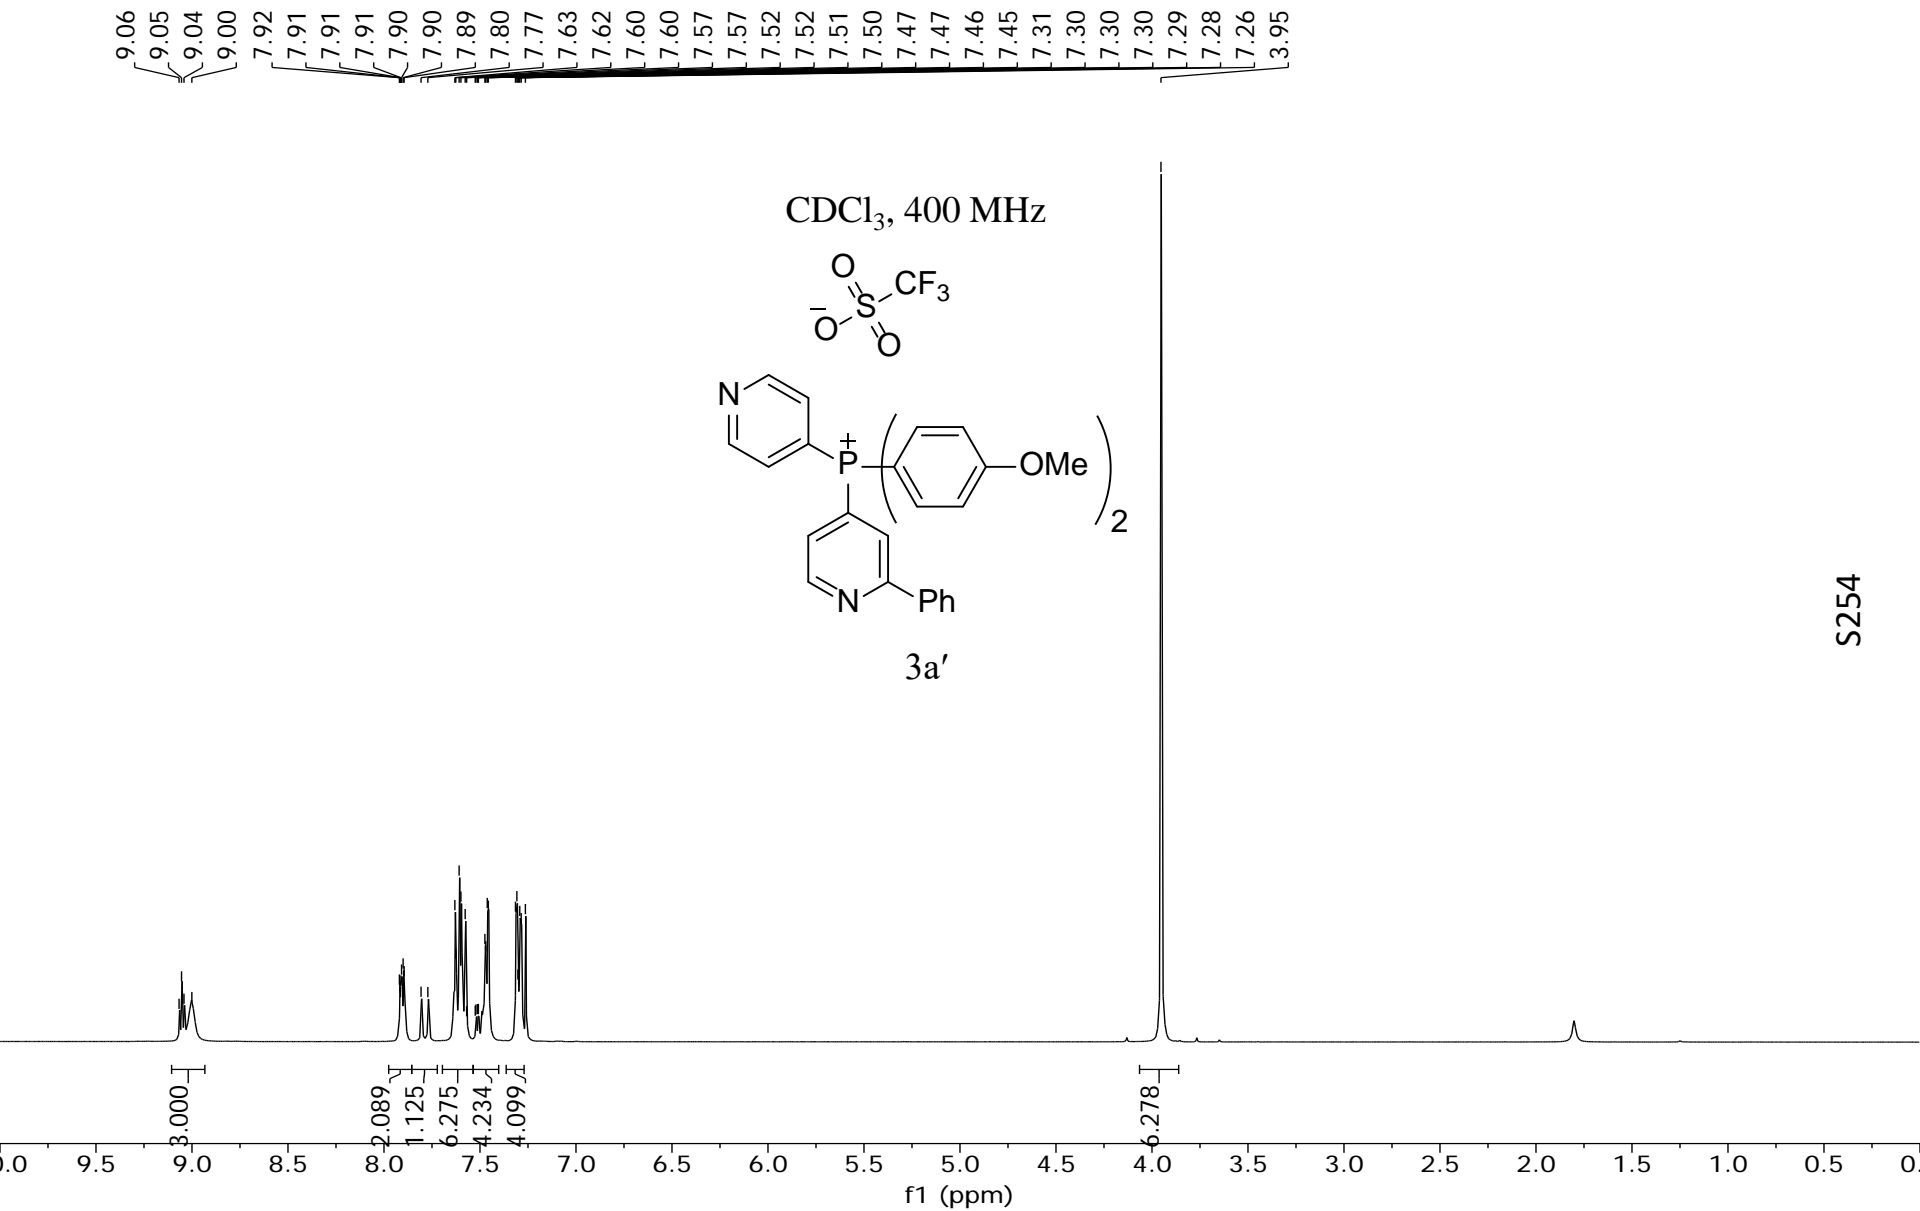

S254

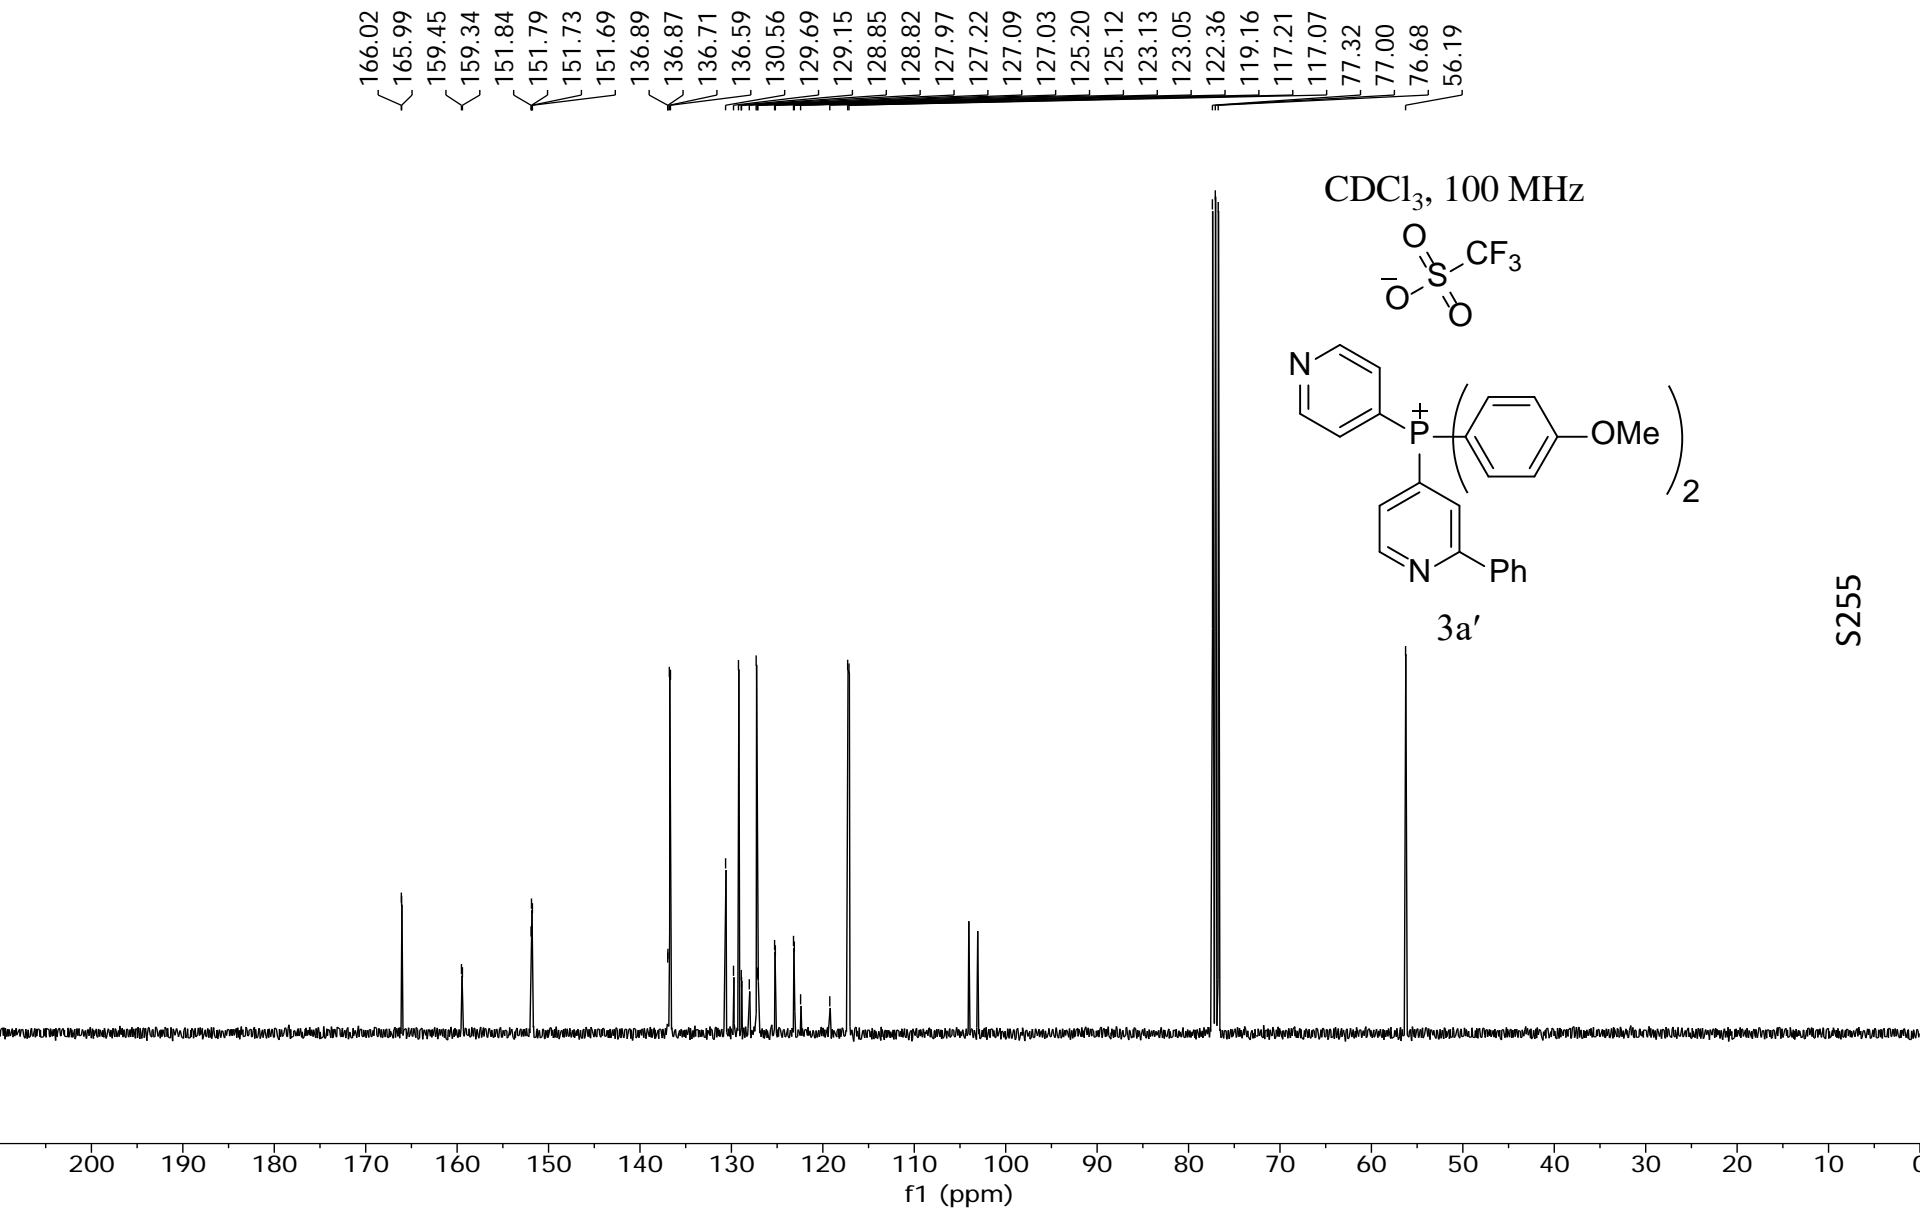

S255

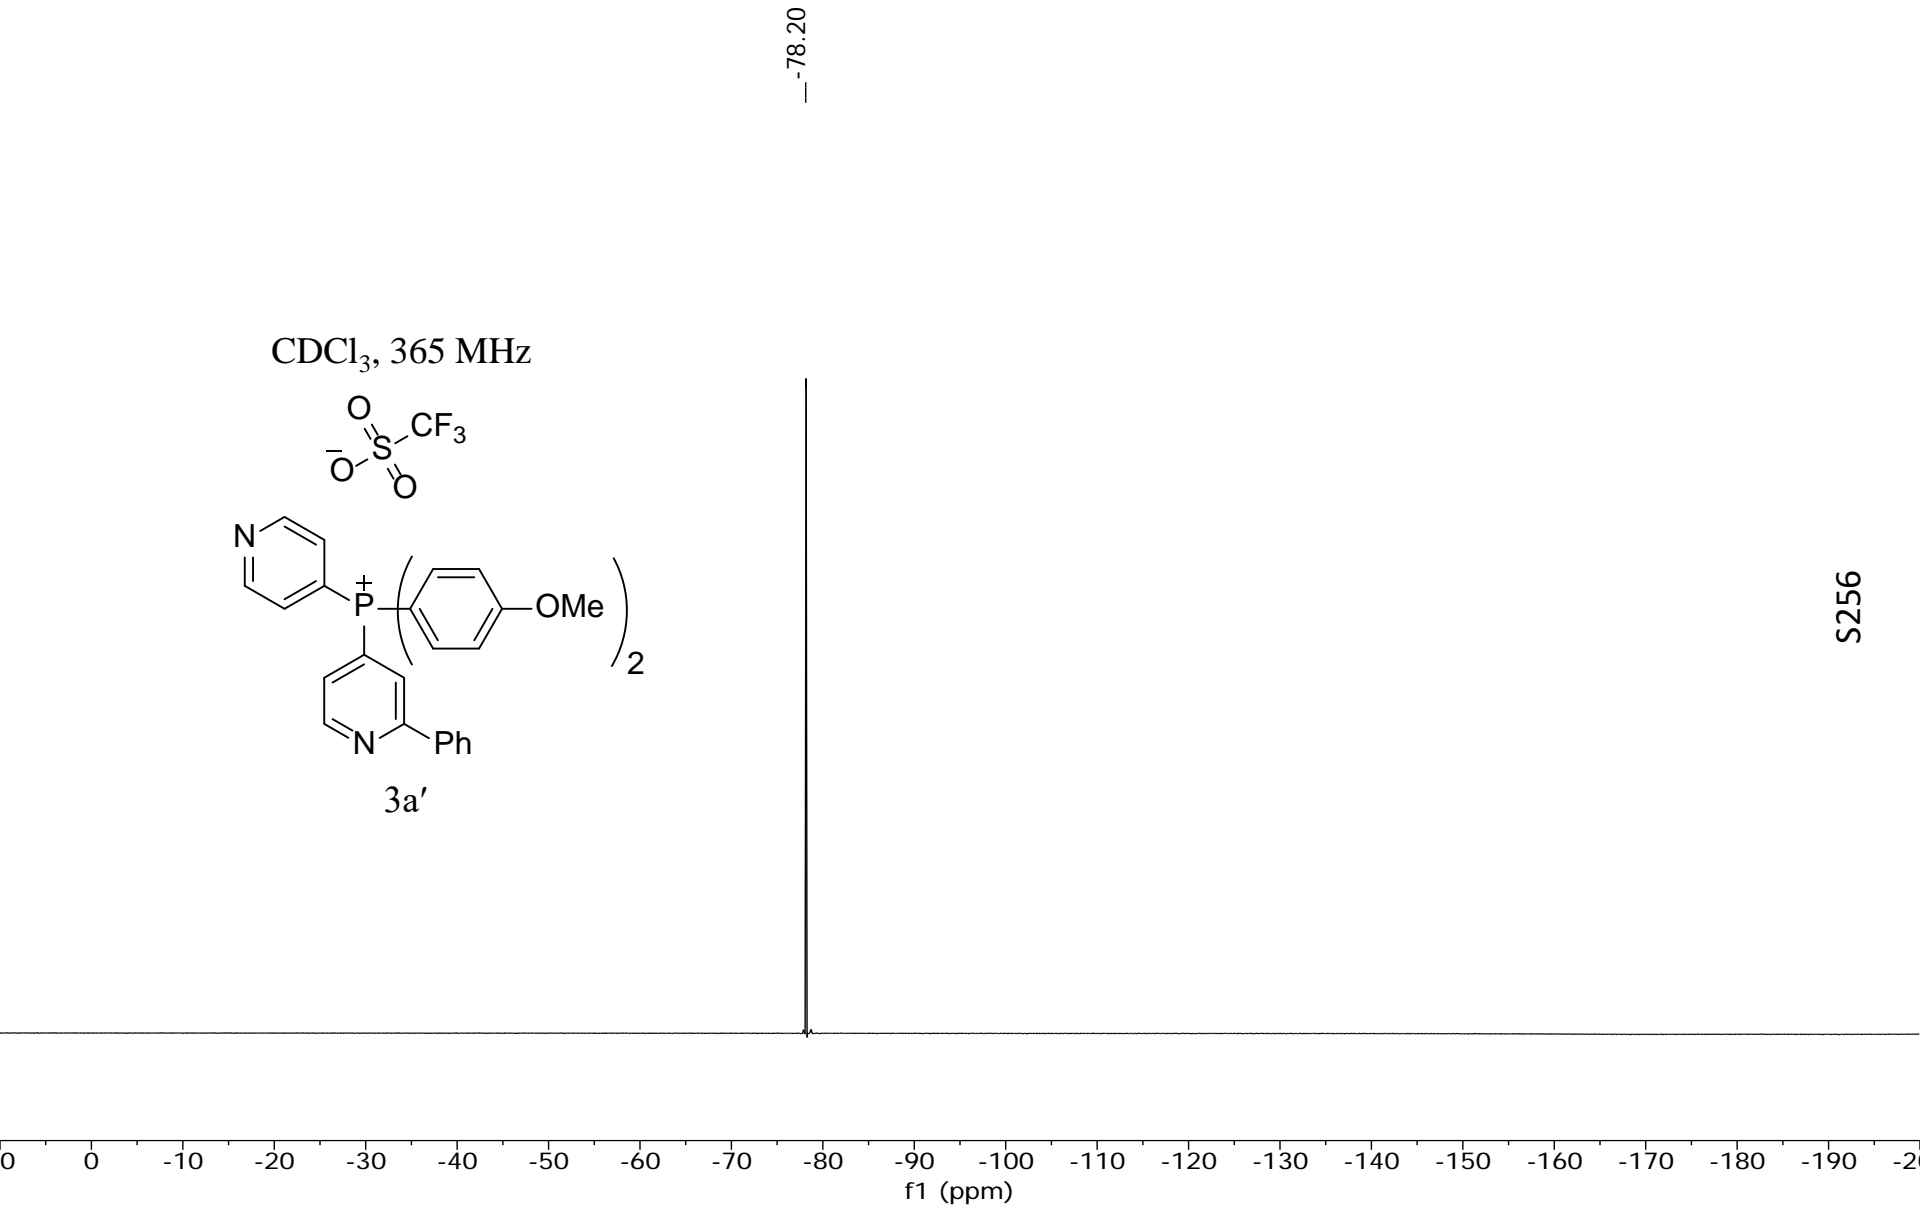



CDCl<sub>3</sub>, 162 MHz

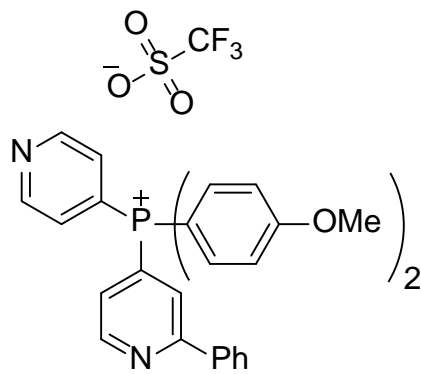

3a'

20.74

S257

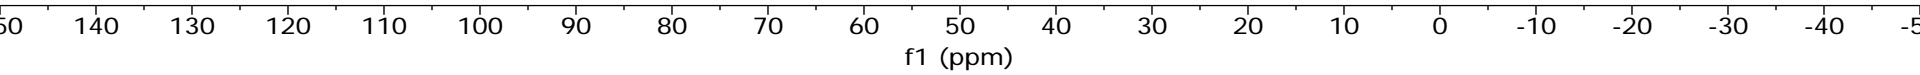

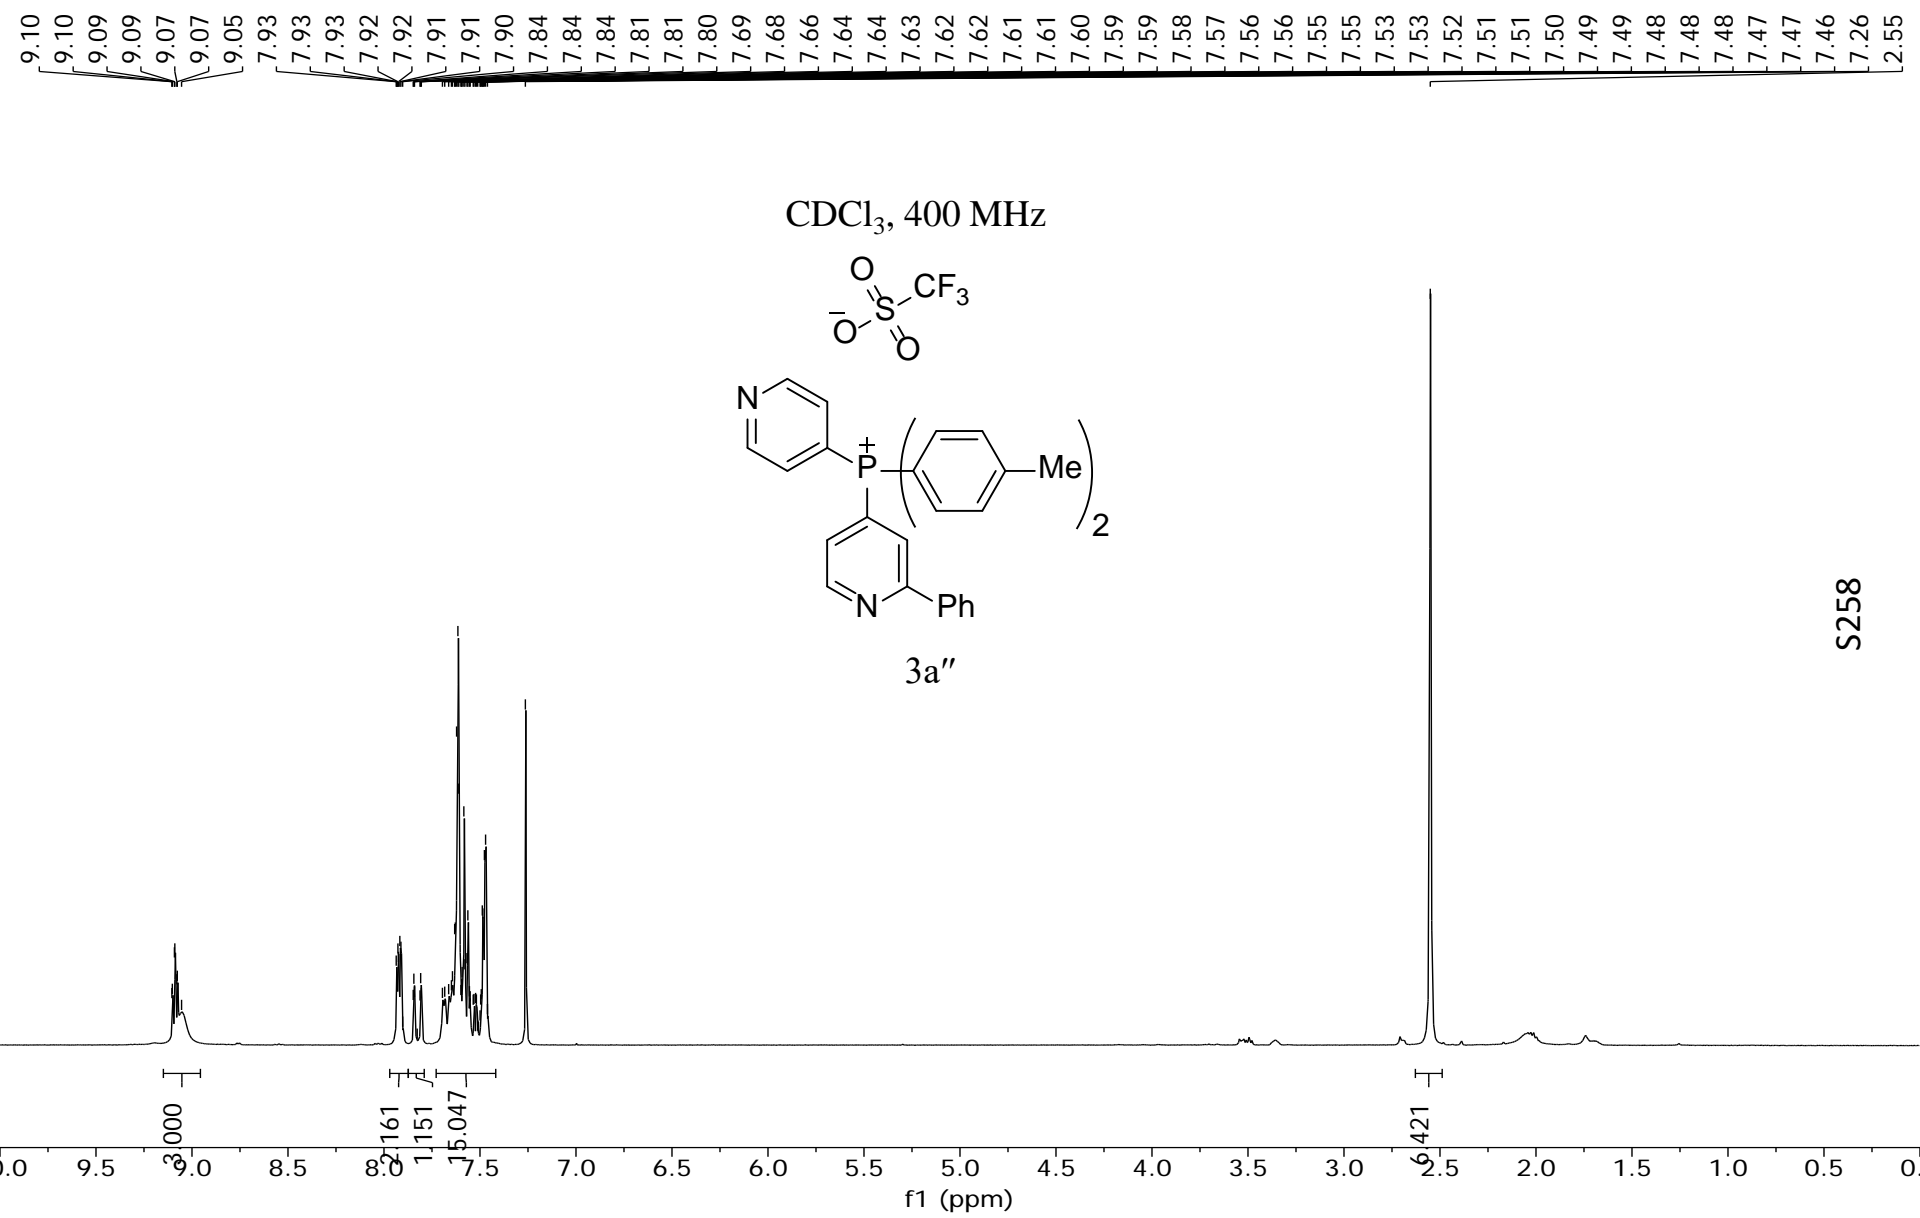

159.39  
159.29  
151.88  
151.78  
151.68  
151.58  
148.54  
148.51  
136.79  
134.52  
134.41  
132.03  
131.90  
130.52  
129.10  
128.73  
128.05  
127.89  
127.30  
127.20  
125.37  
125.29  
123.22  
123.13  
122.24  
119.05  
110.83  
109.91  
77.32  
77.00  
76.68

—21.92

CDCl<sub>3</sub>, 100 MHz

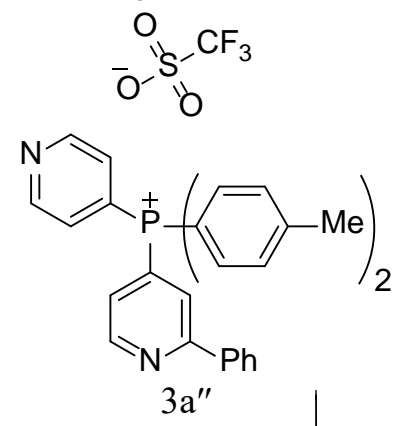

S259

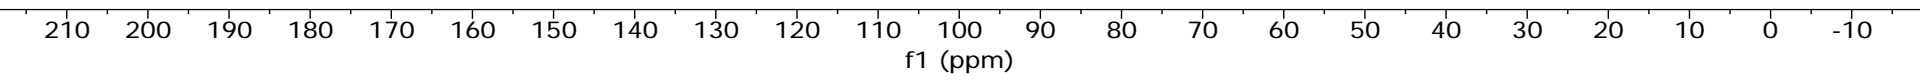

CDCl<sub>3</sub>, 365 MHz

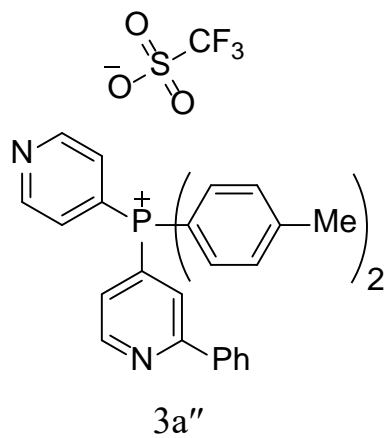

-78.29

0 10 20 30 40 50 60 70 80 90 100 110 120 130 140 150 160 170 180 190 200

f1 (ppm)

S260

CDCl<sub>3</sub>, 162 MHz

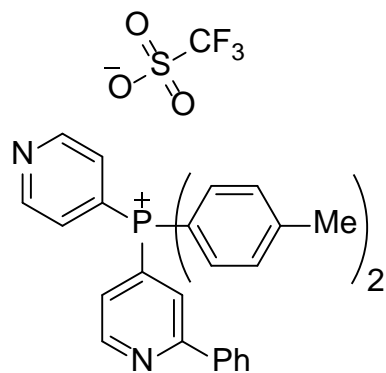

3a''

-21.61

S261

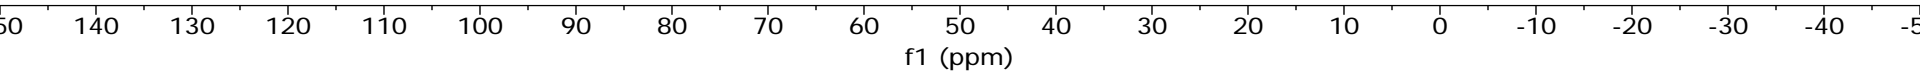

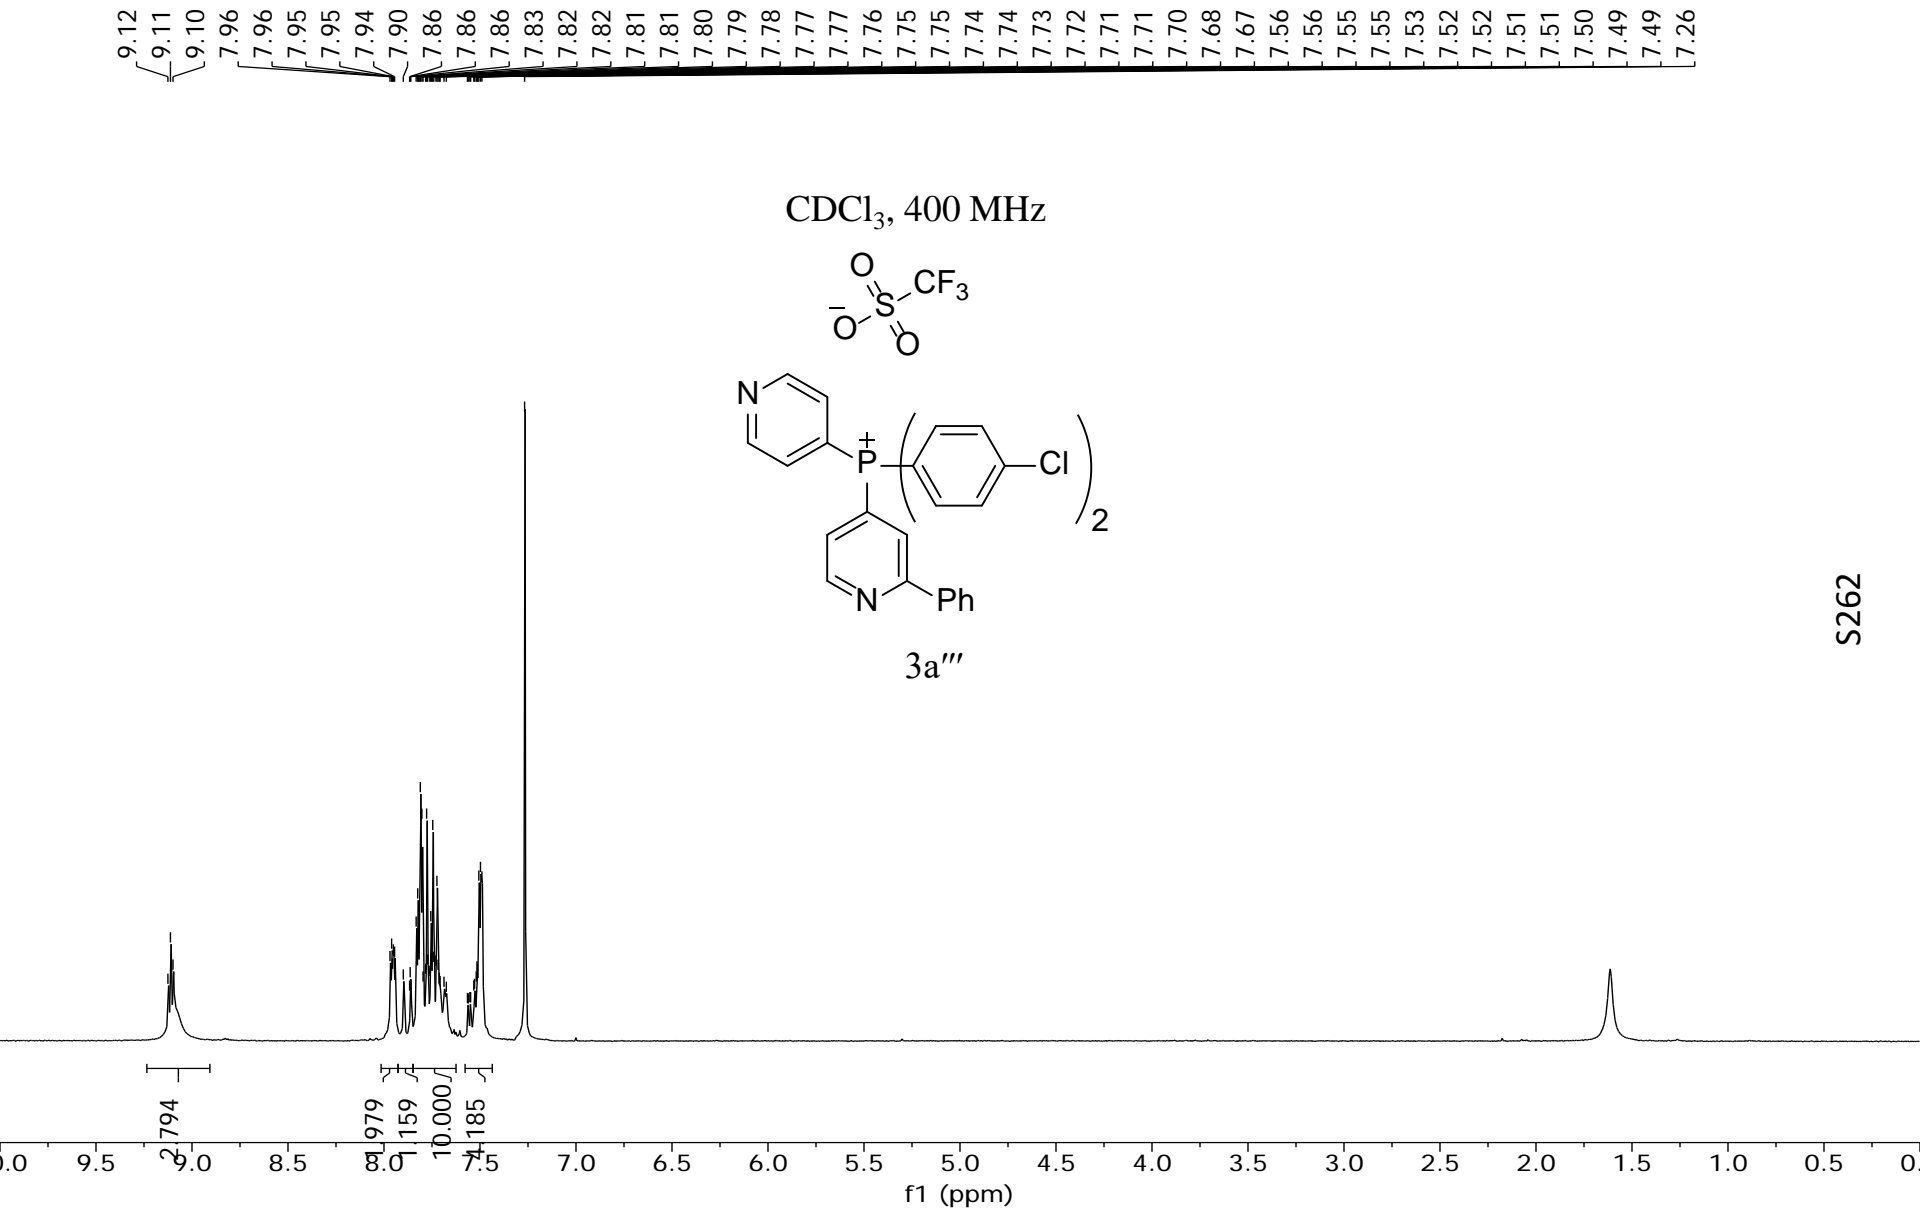

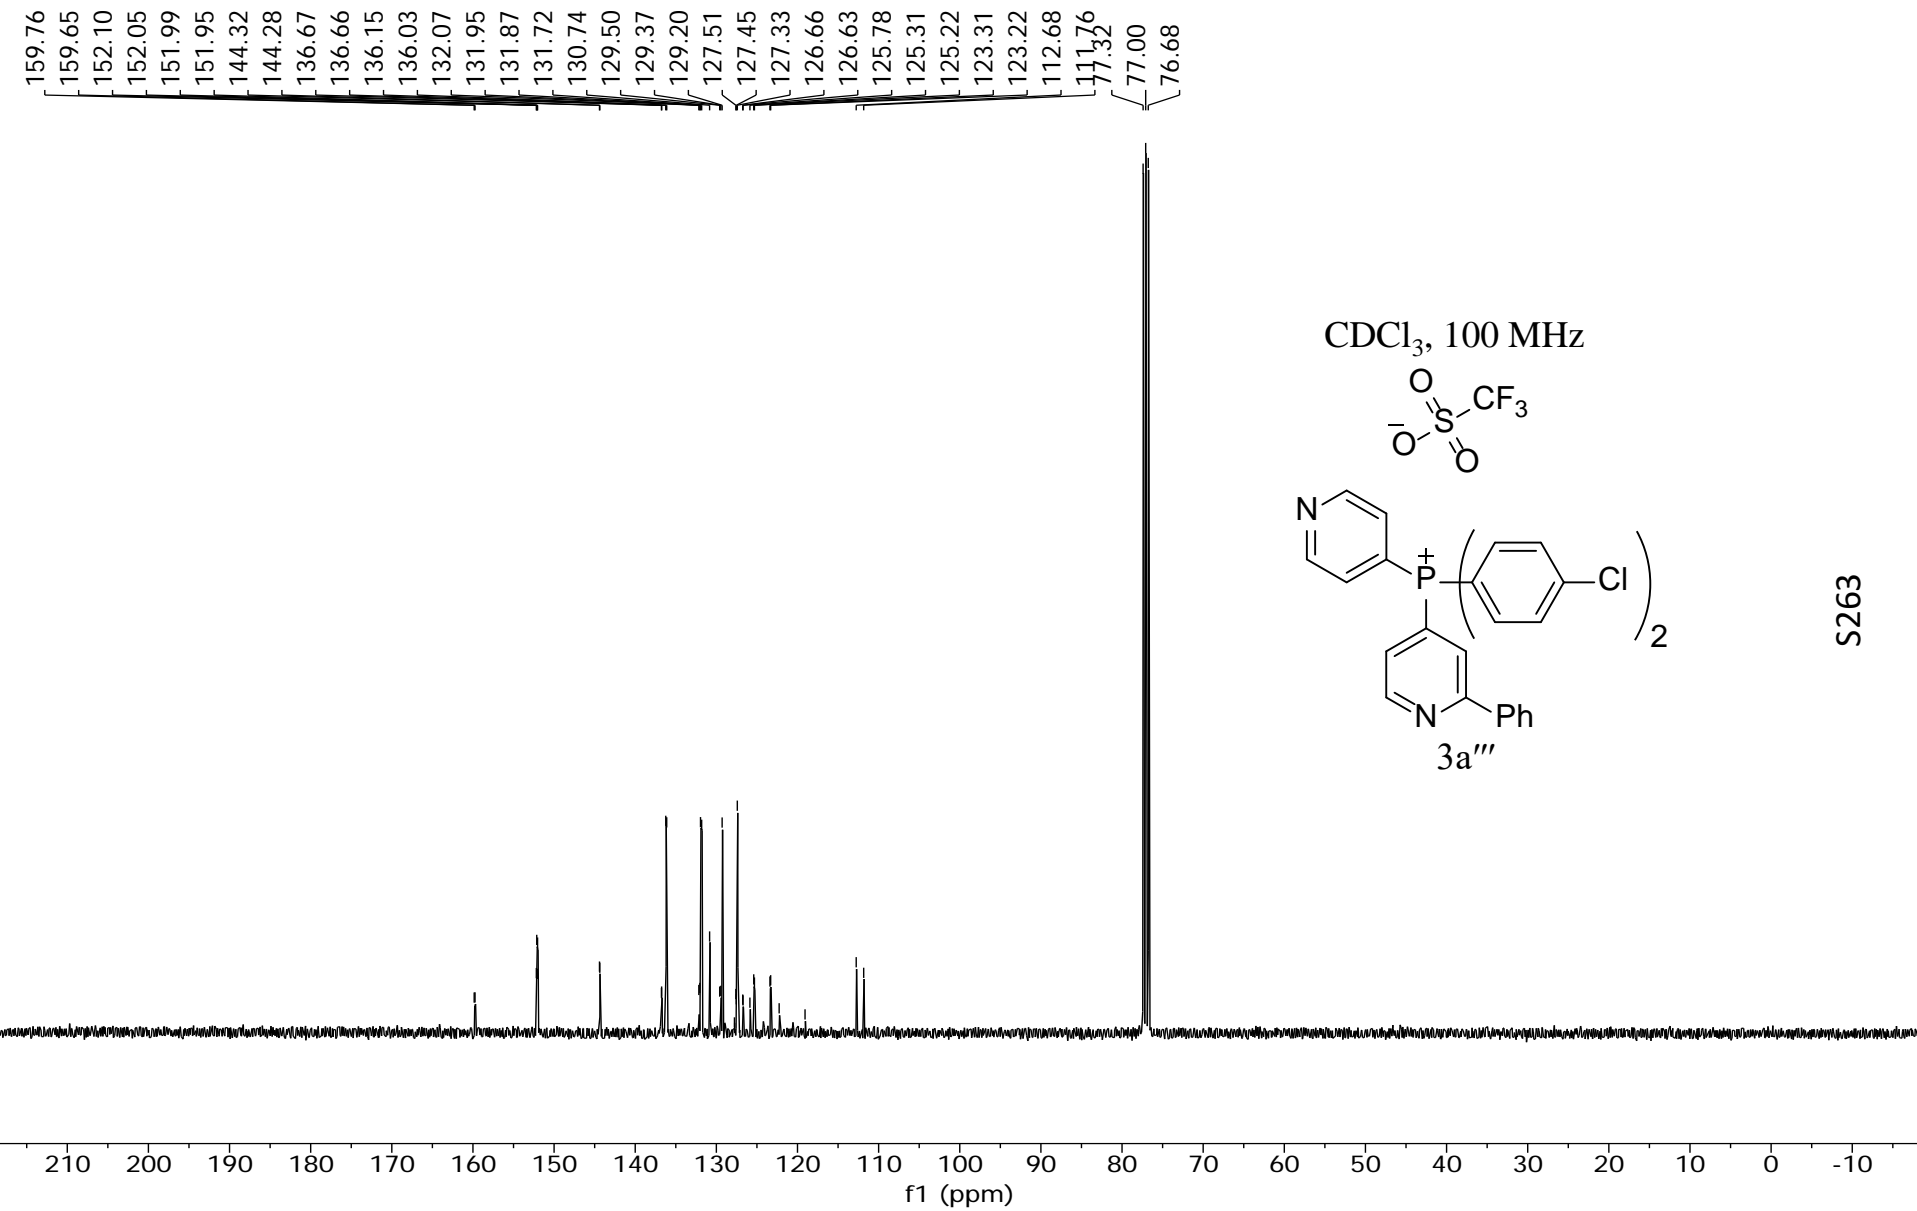

CDCl<sub>3</sub>, 365 MHz

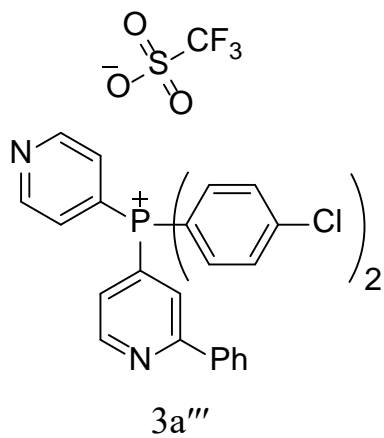

-78.40

f1 (ppm)

S264



CDCl<sub>3</sub>, 162 MHz

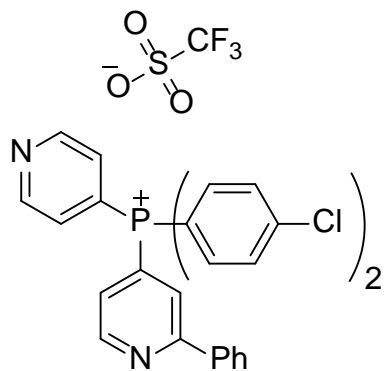

3a'''

-21.96

S265



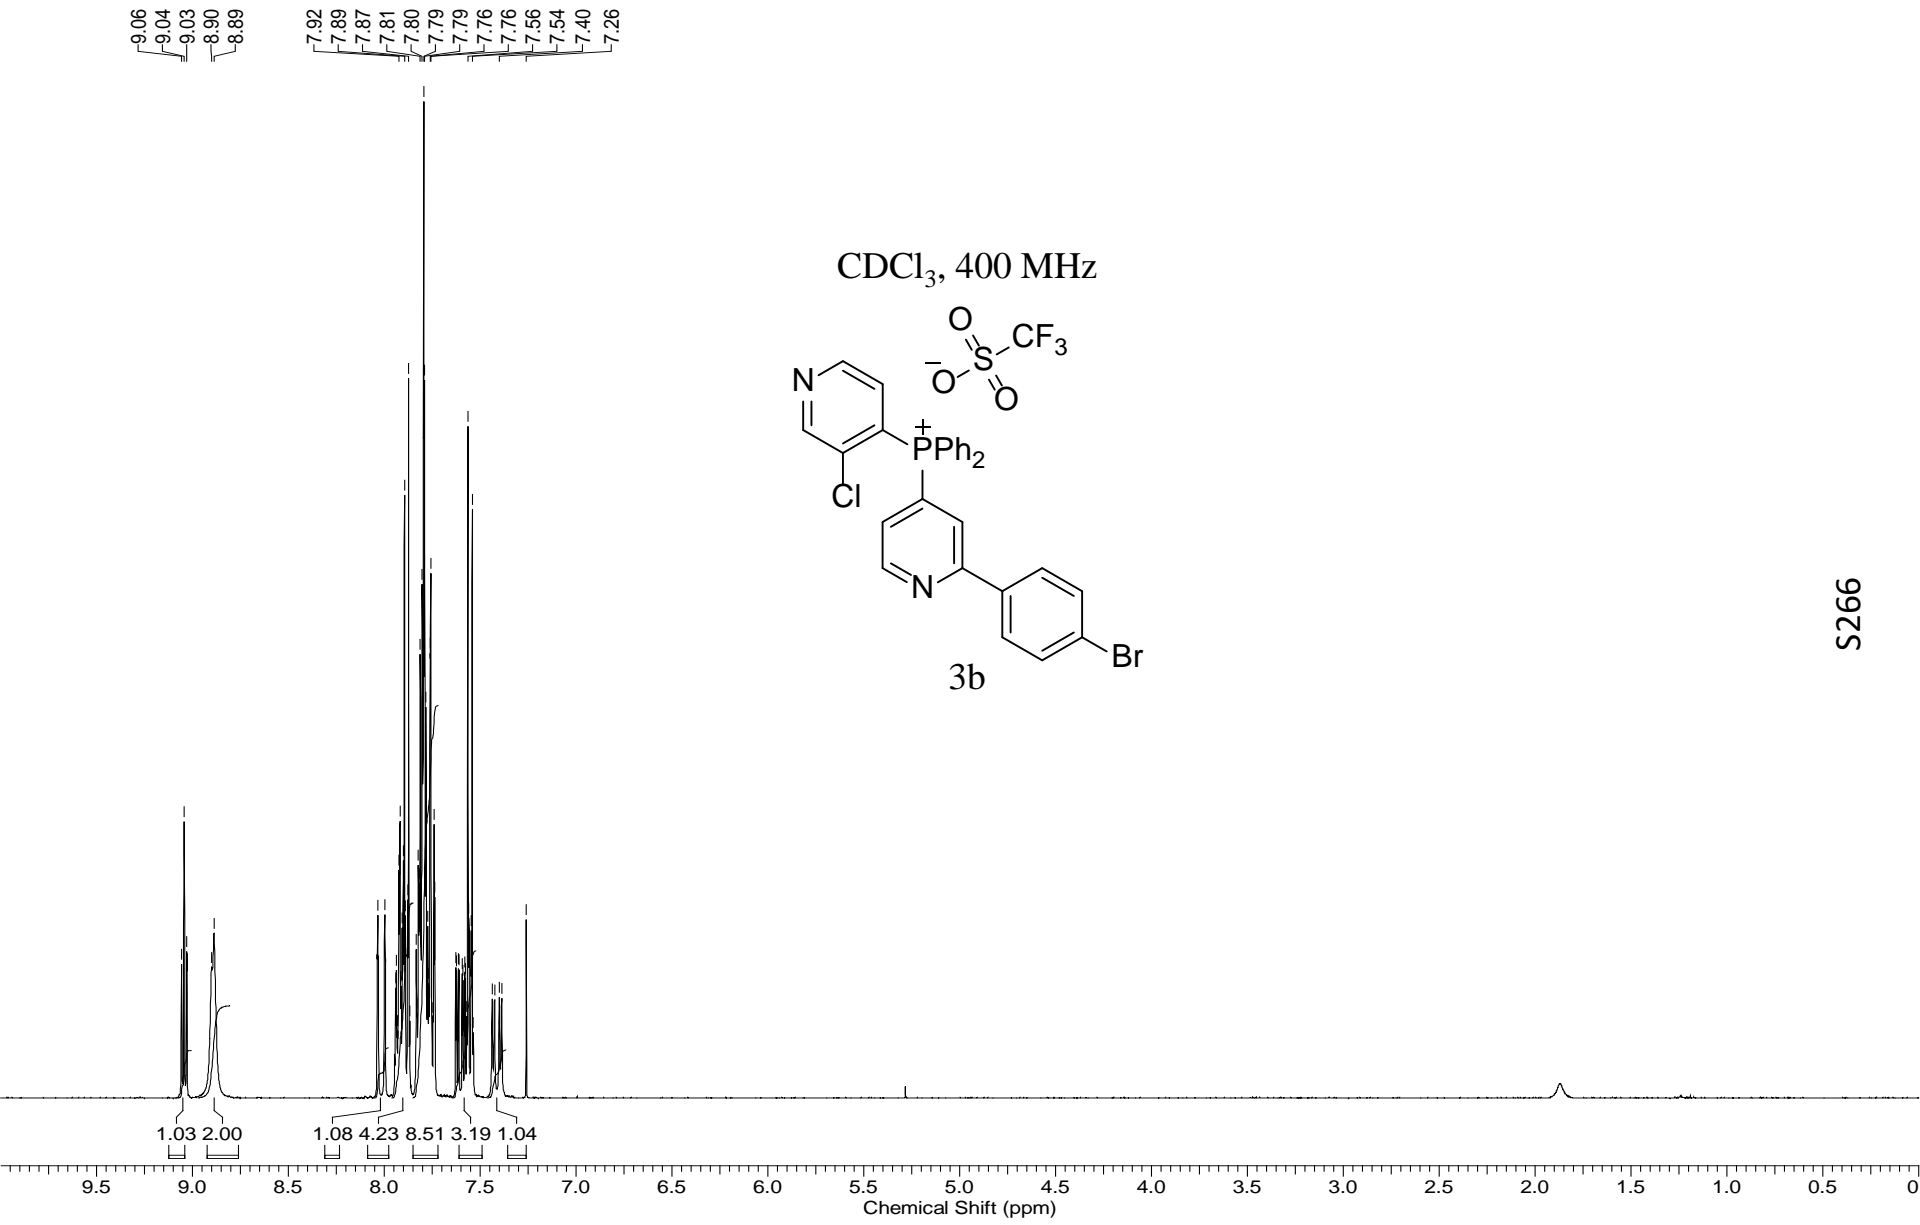

S266

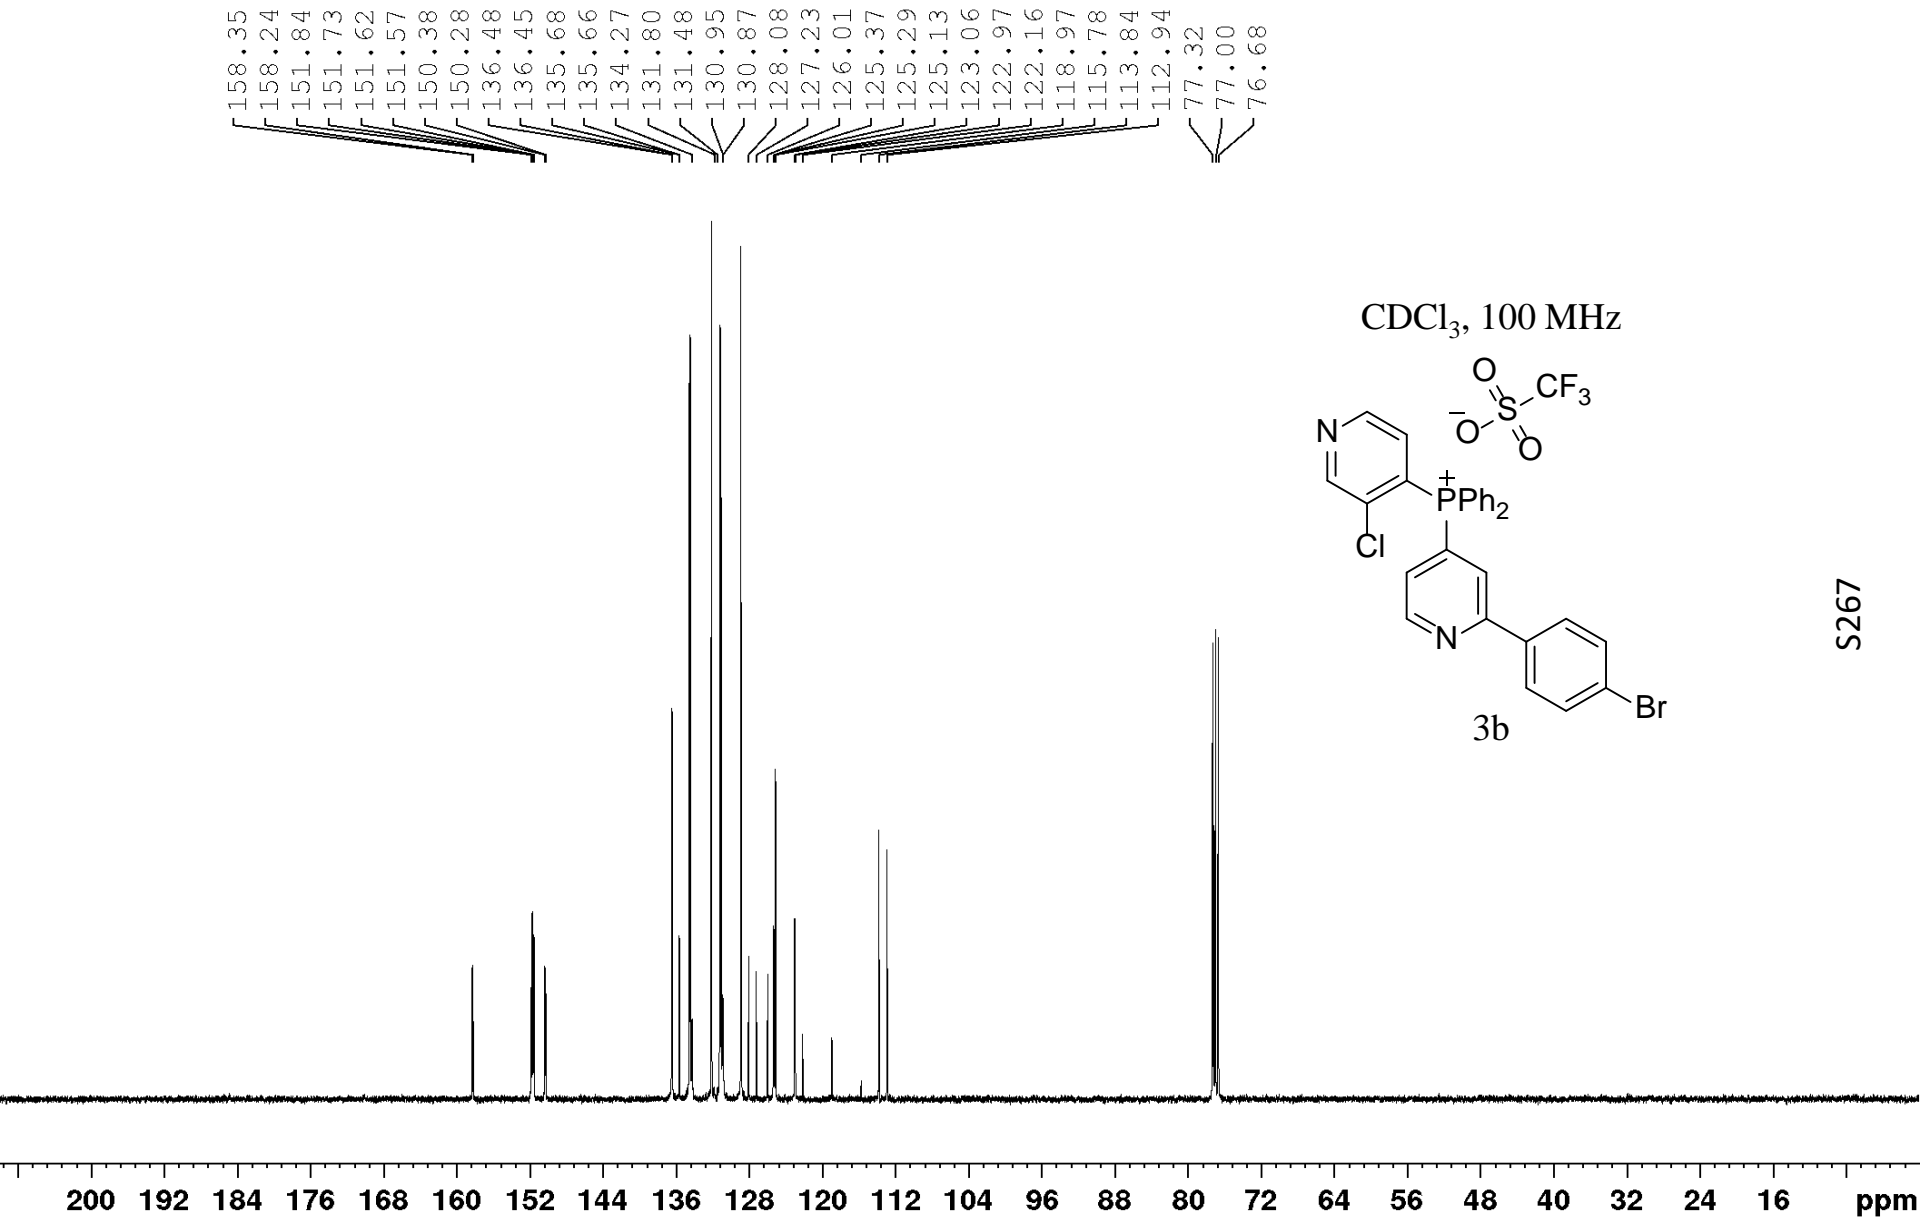

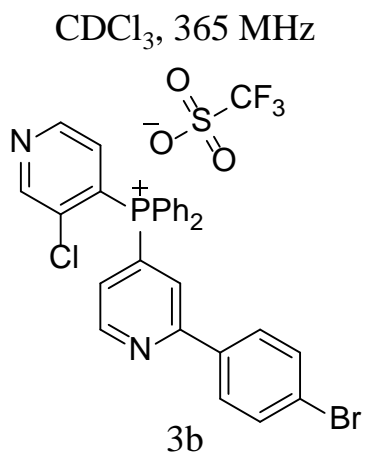

-78.18

0 -10 -20 -30 -40 -50 -60 -70 -80 -90 -100 -110 -120 -130 -140 -150 -160 -170 -180 ppm

S268

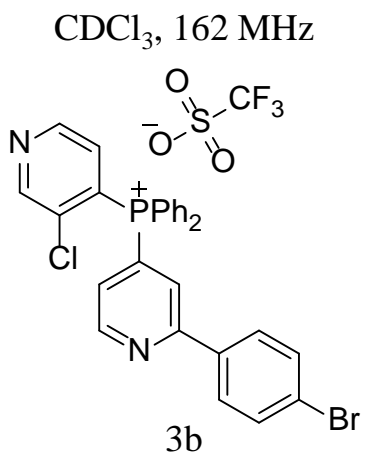

— 22.17

140 130 120 110 100 90 80 70 60 50 40 30 20 10 0 -10 -20 -30 ppm

S269

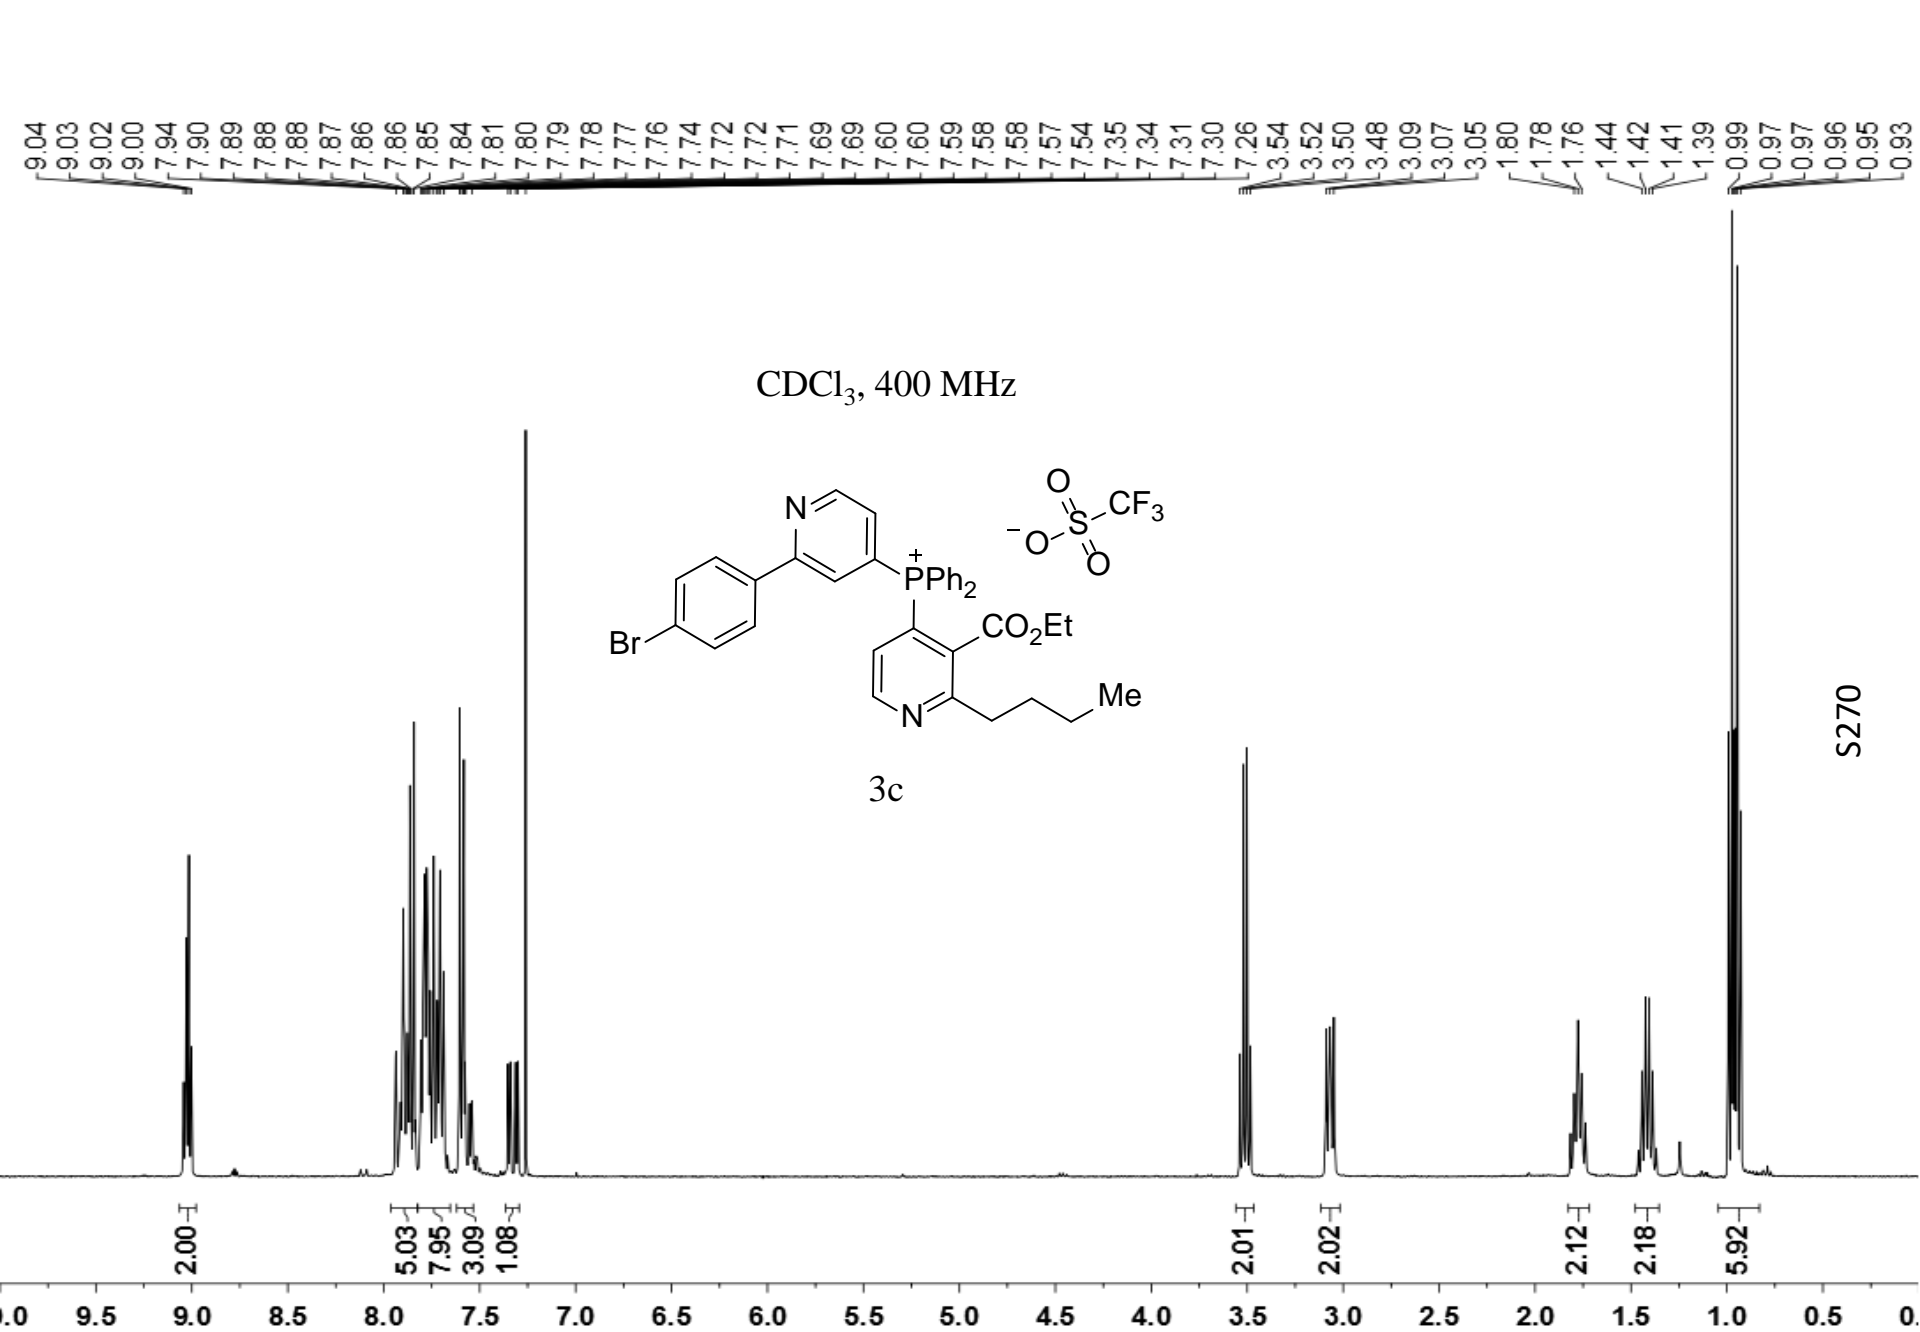

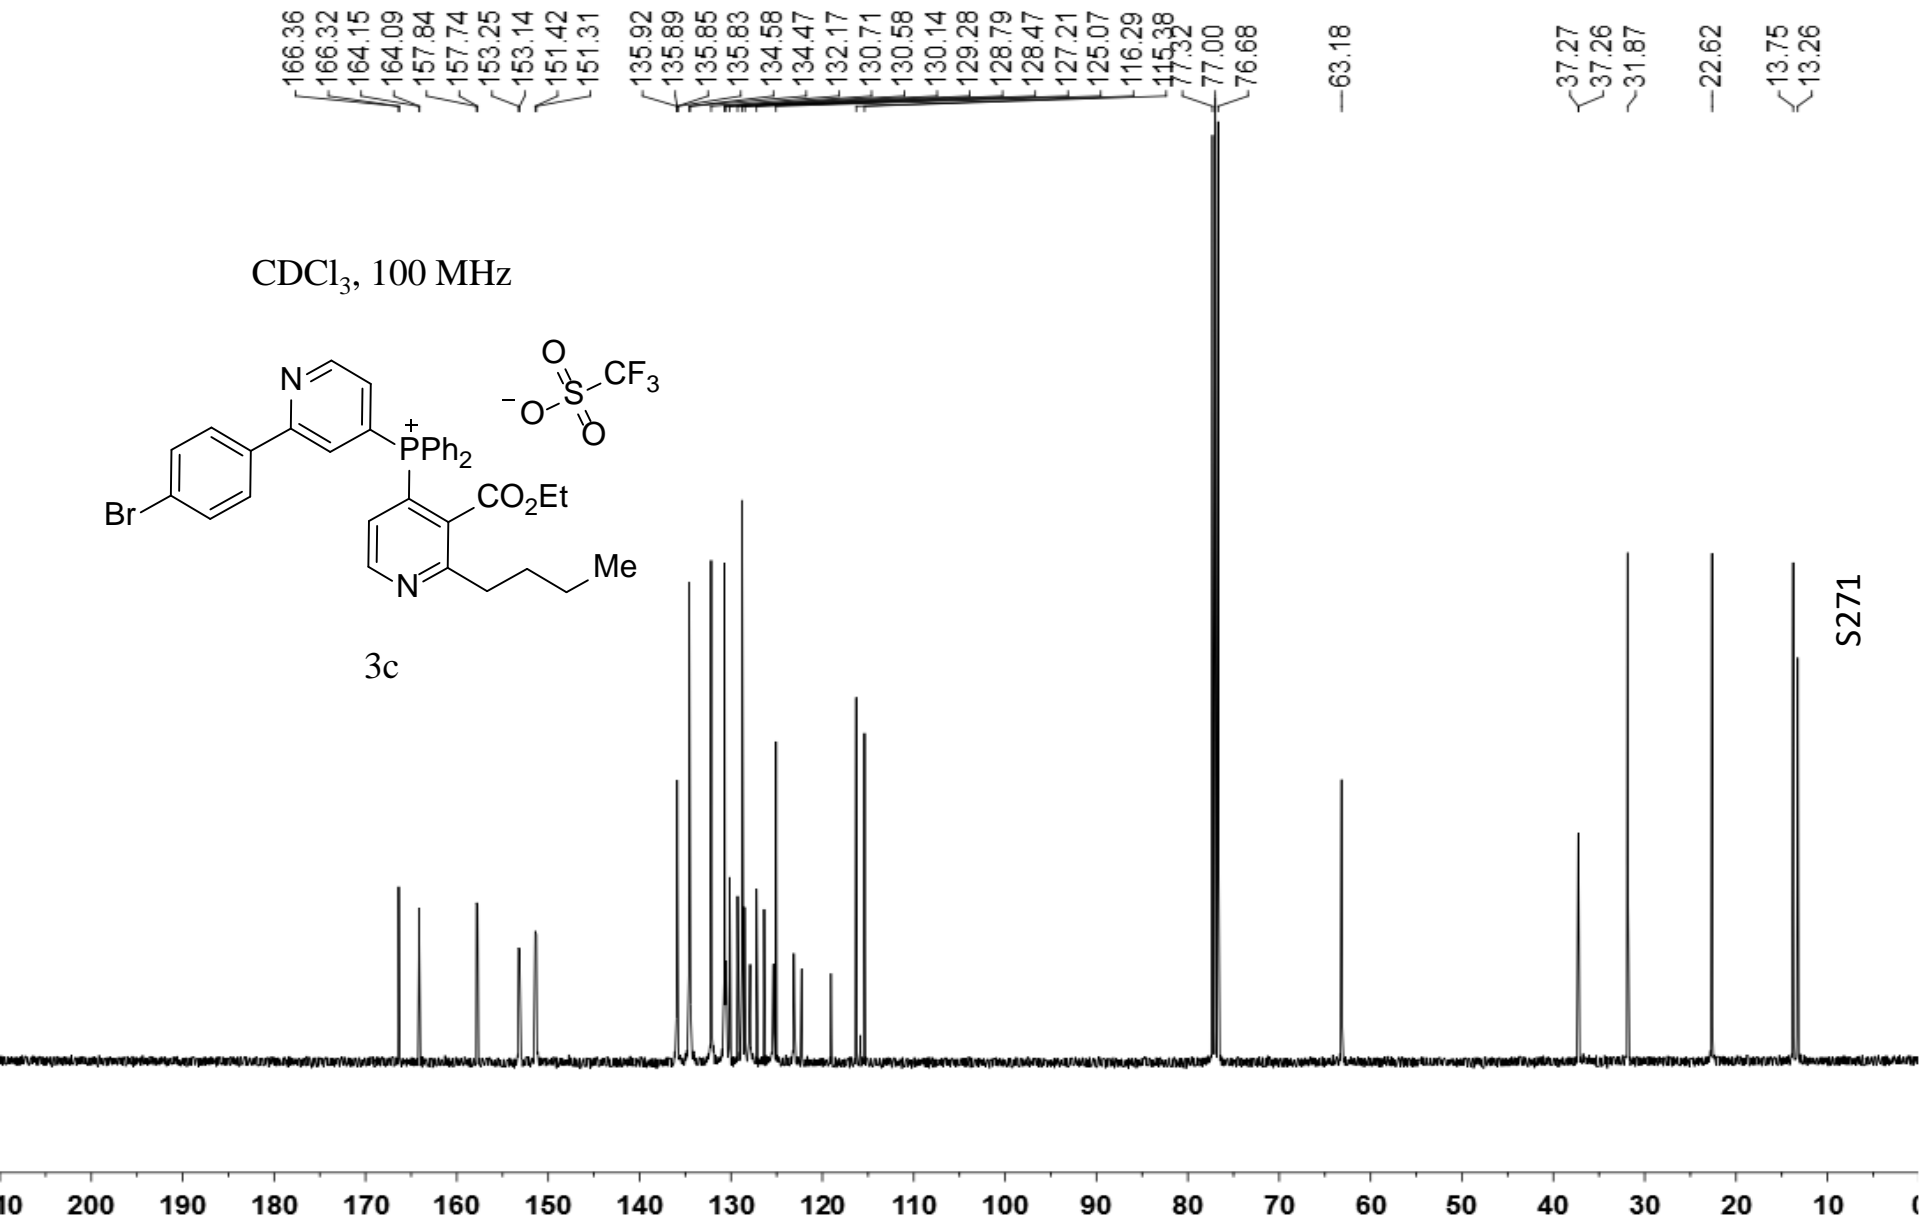

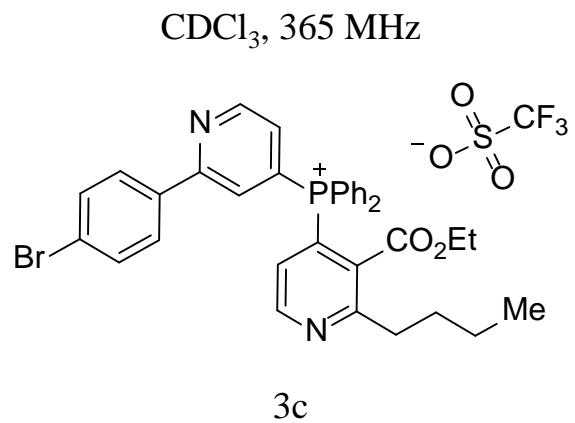

78.19

0 10 0 -10 -20 -30 -40 -50 -60 -70 -80 -90 -110 -130 -150 -170 -190



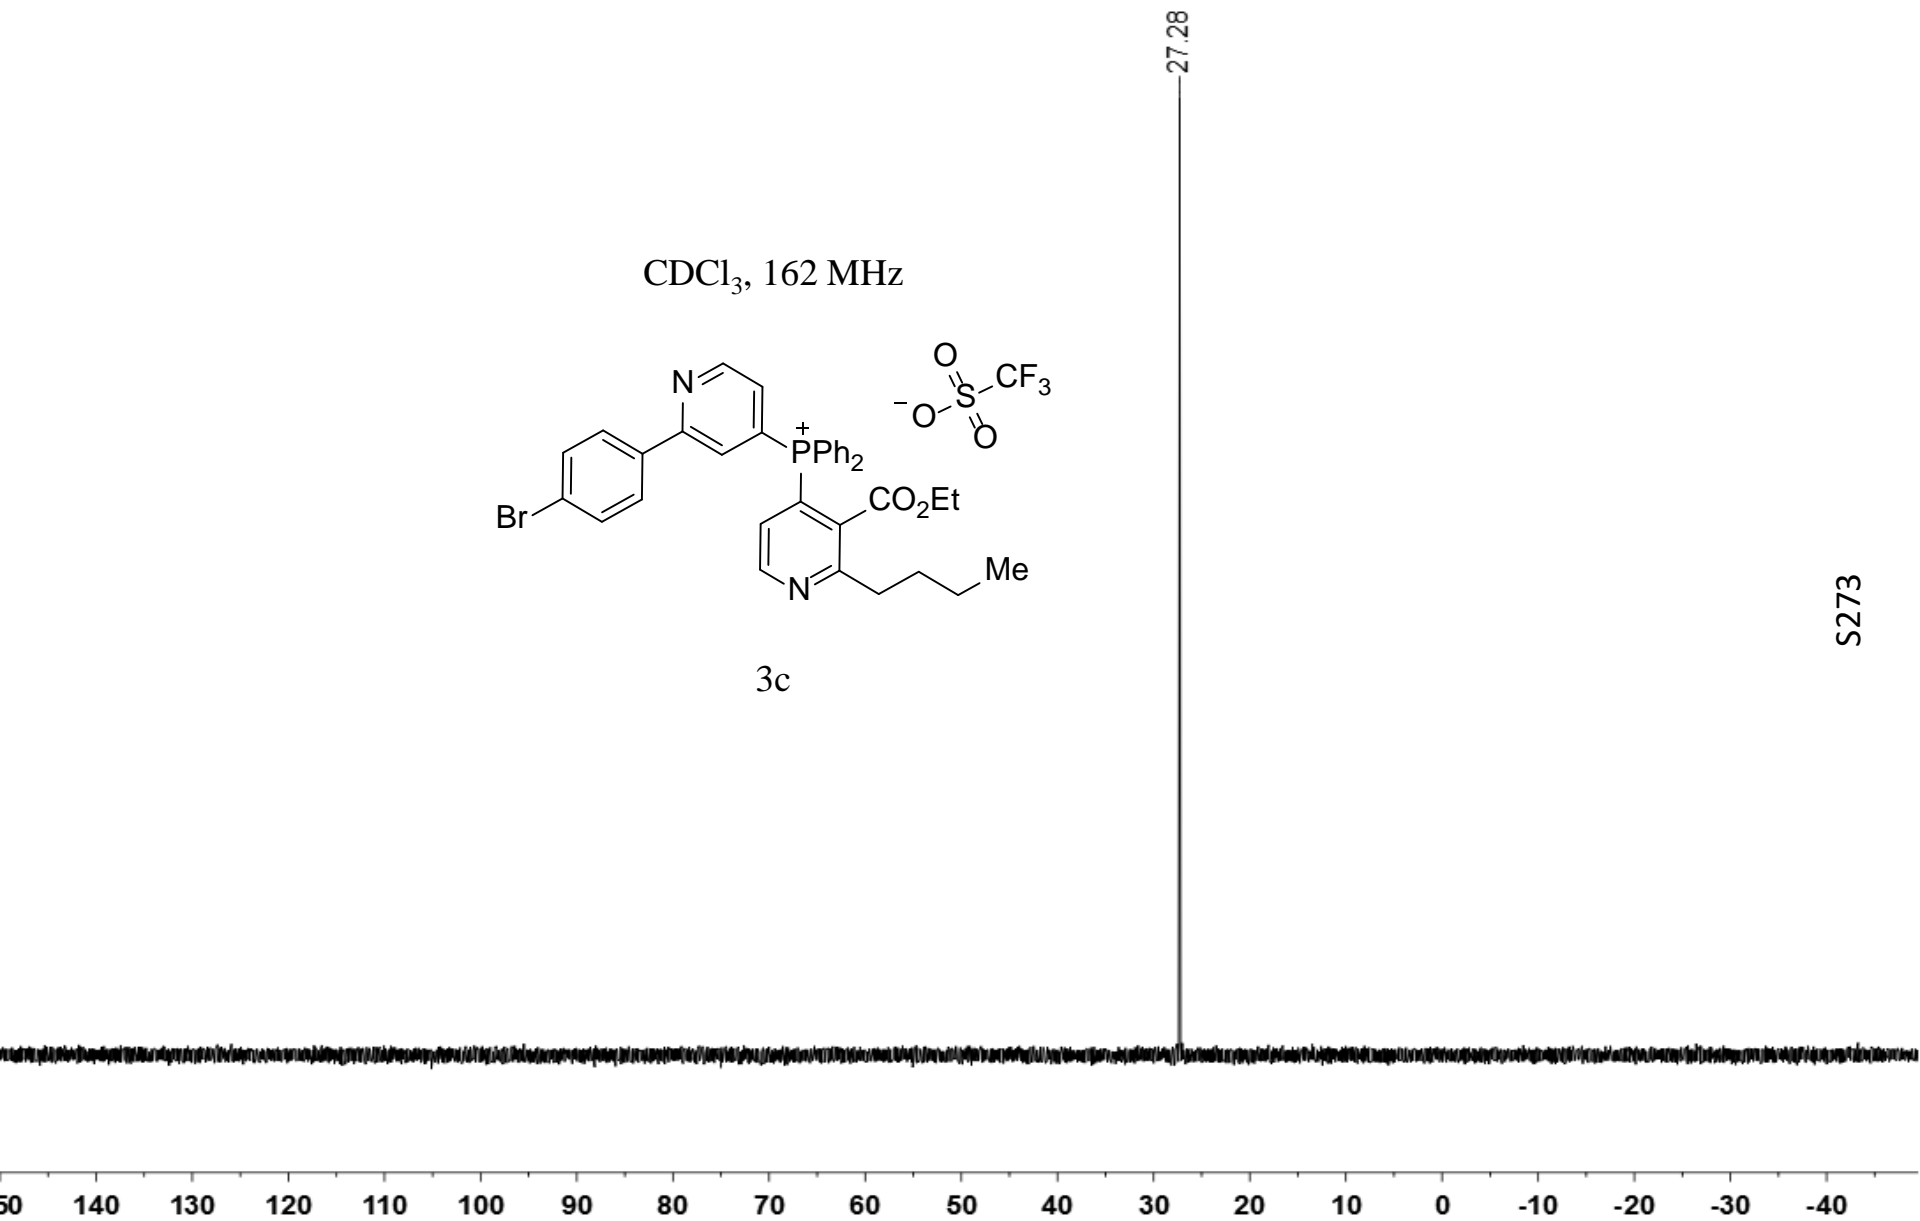

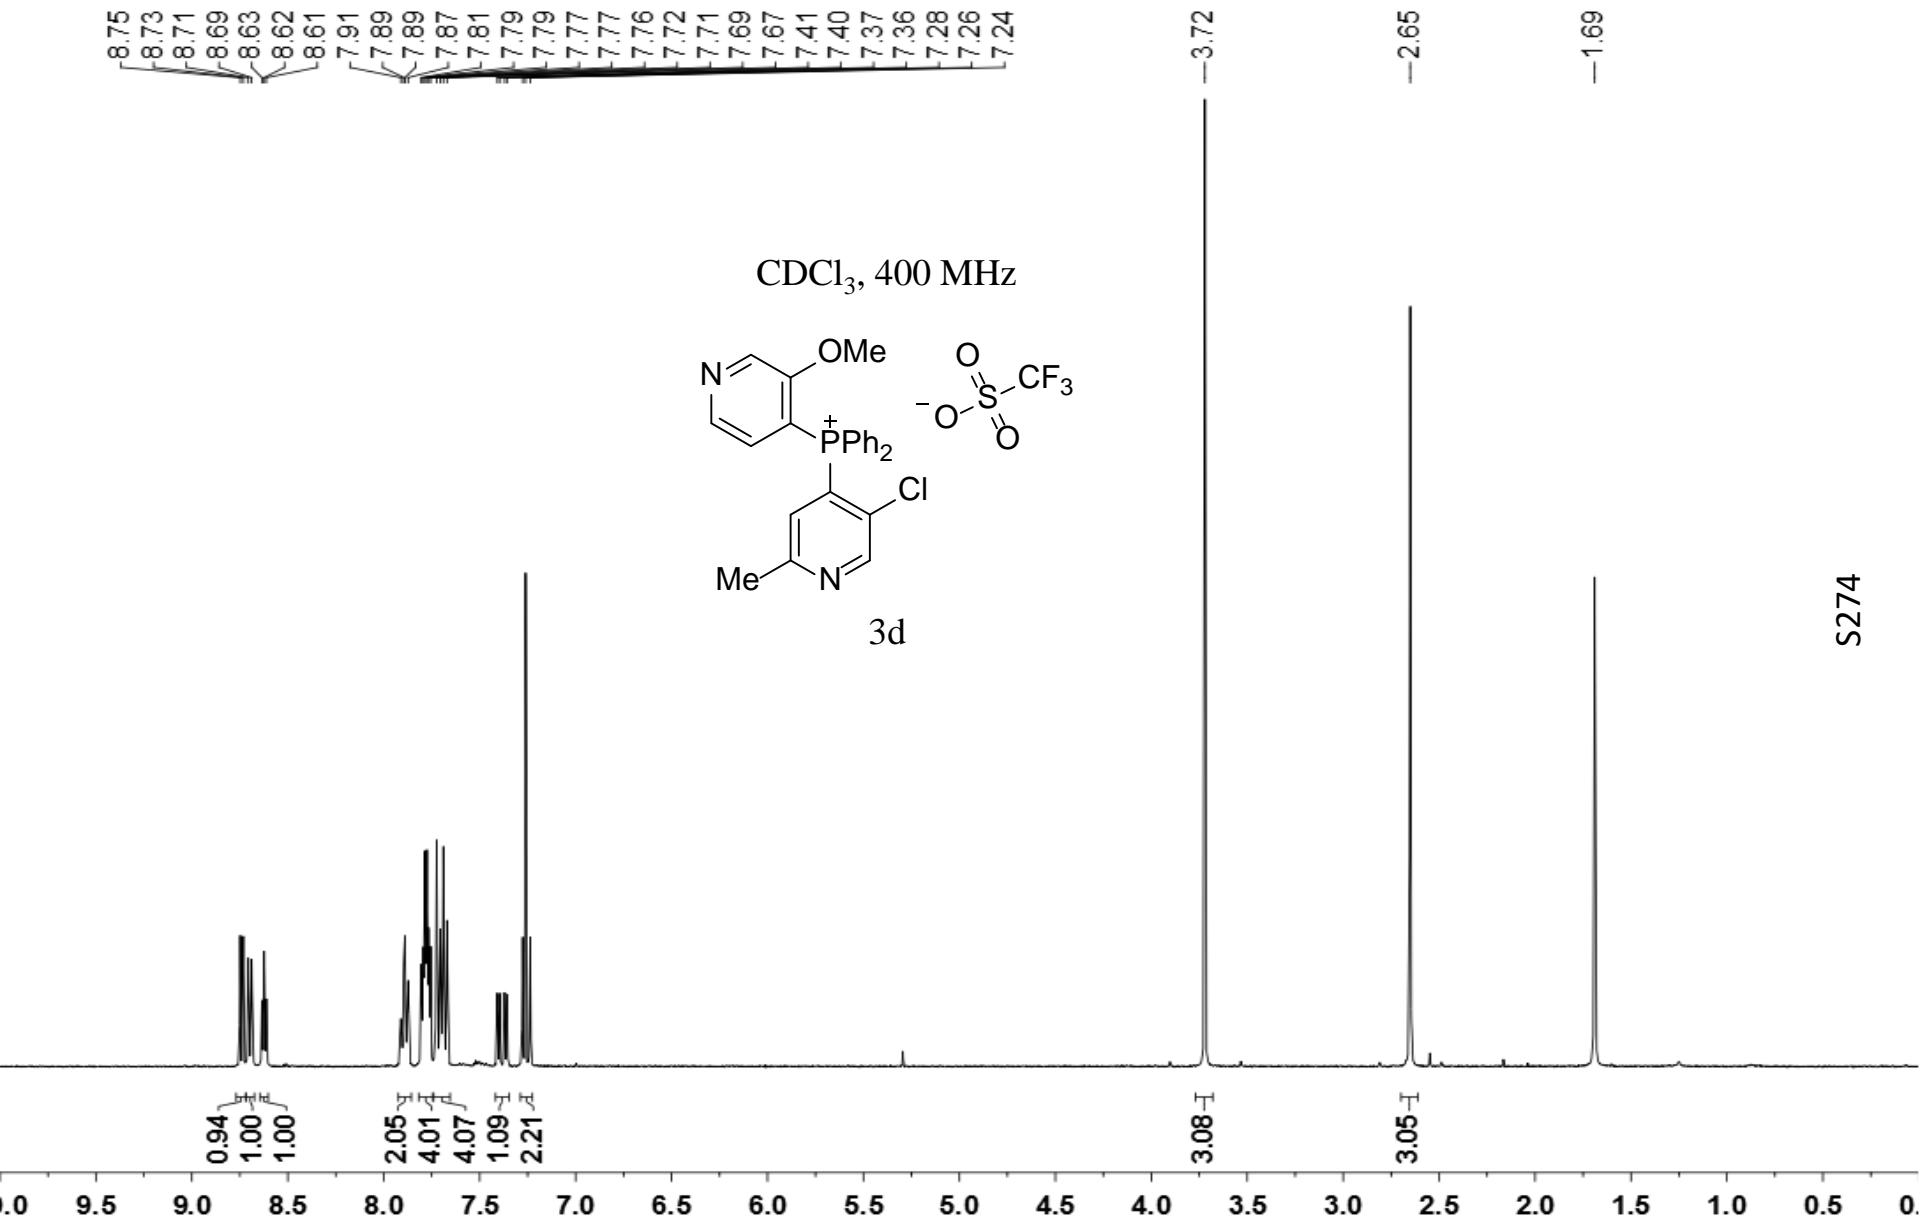

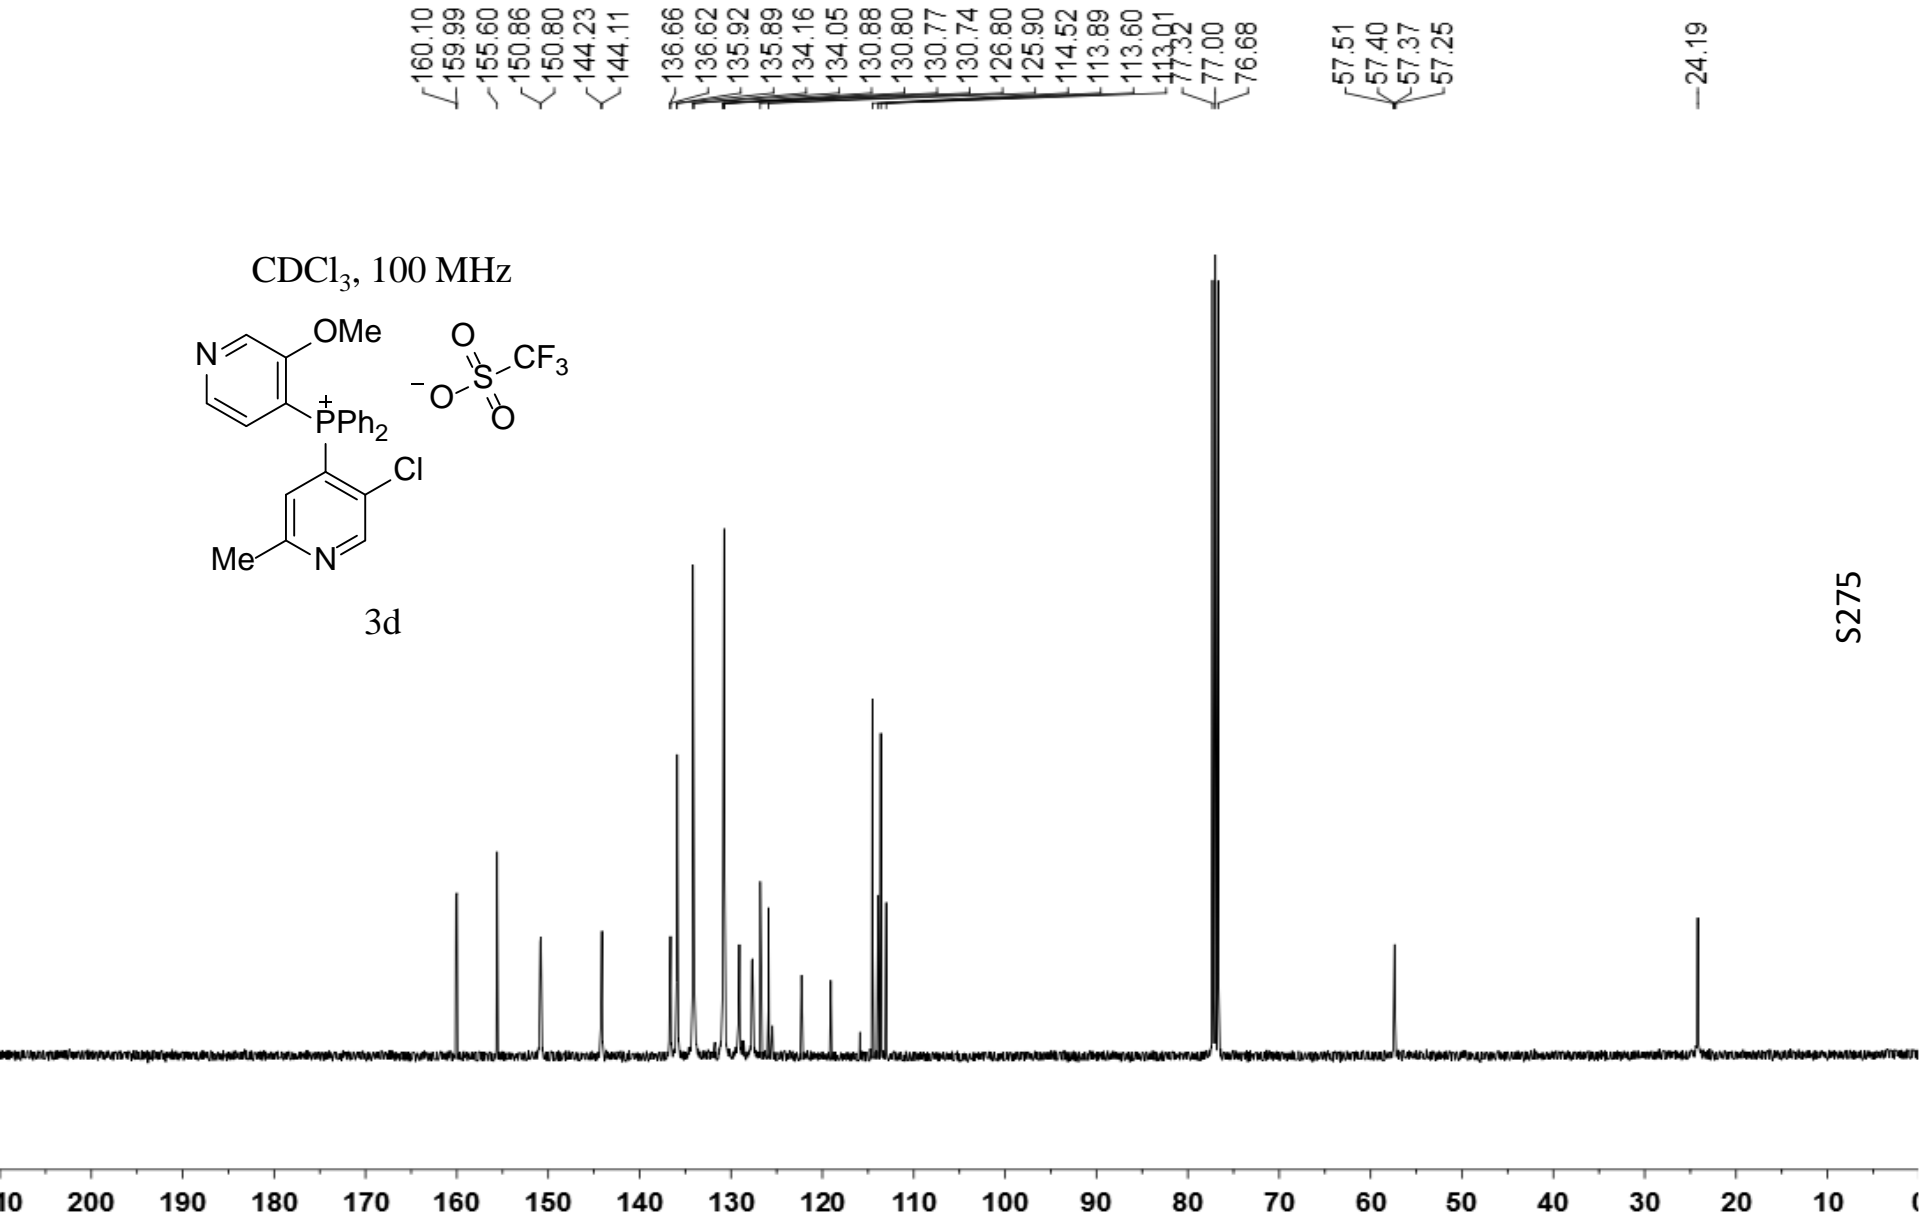

S275

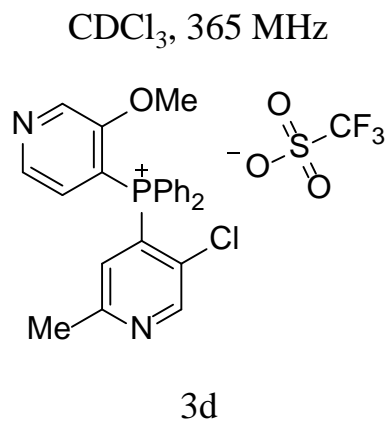

78.26

0 10 0 -10 -20 -30 -40 -50 -60 -70 -80 -90 -110 -130 -150 -170 -190

S276

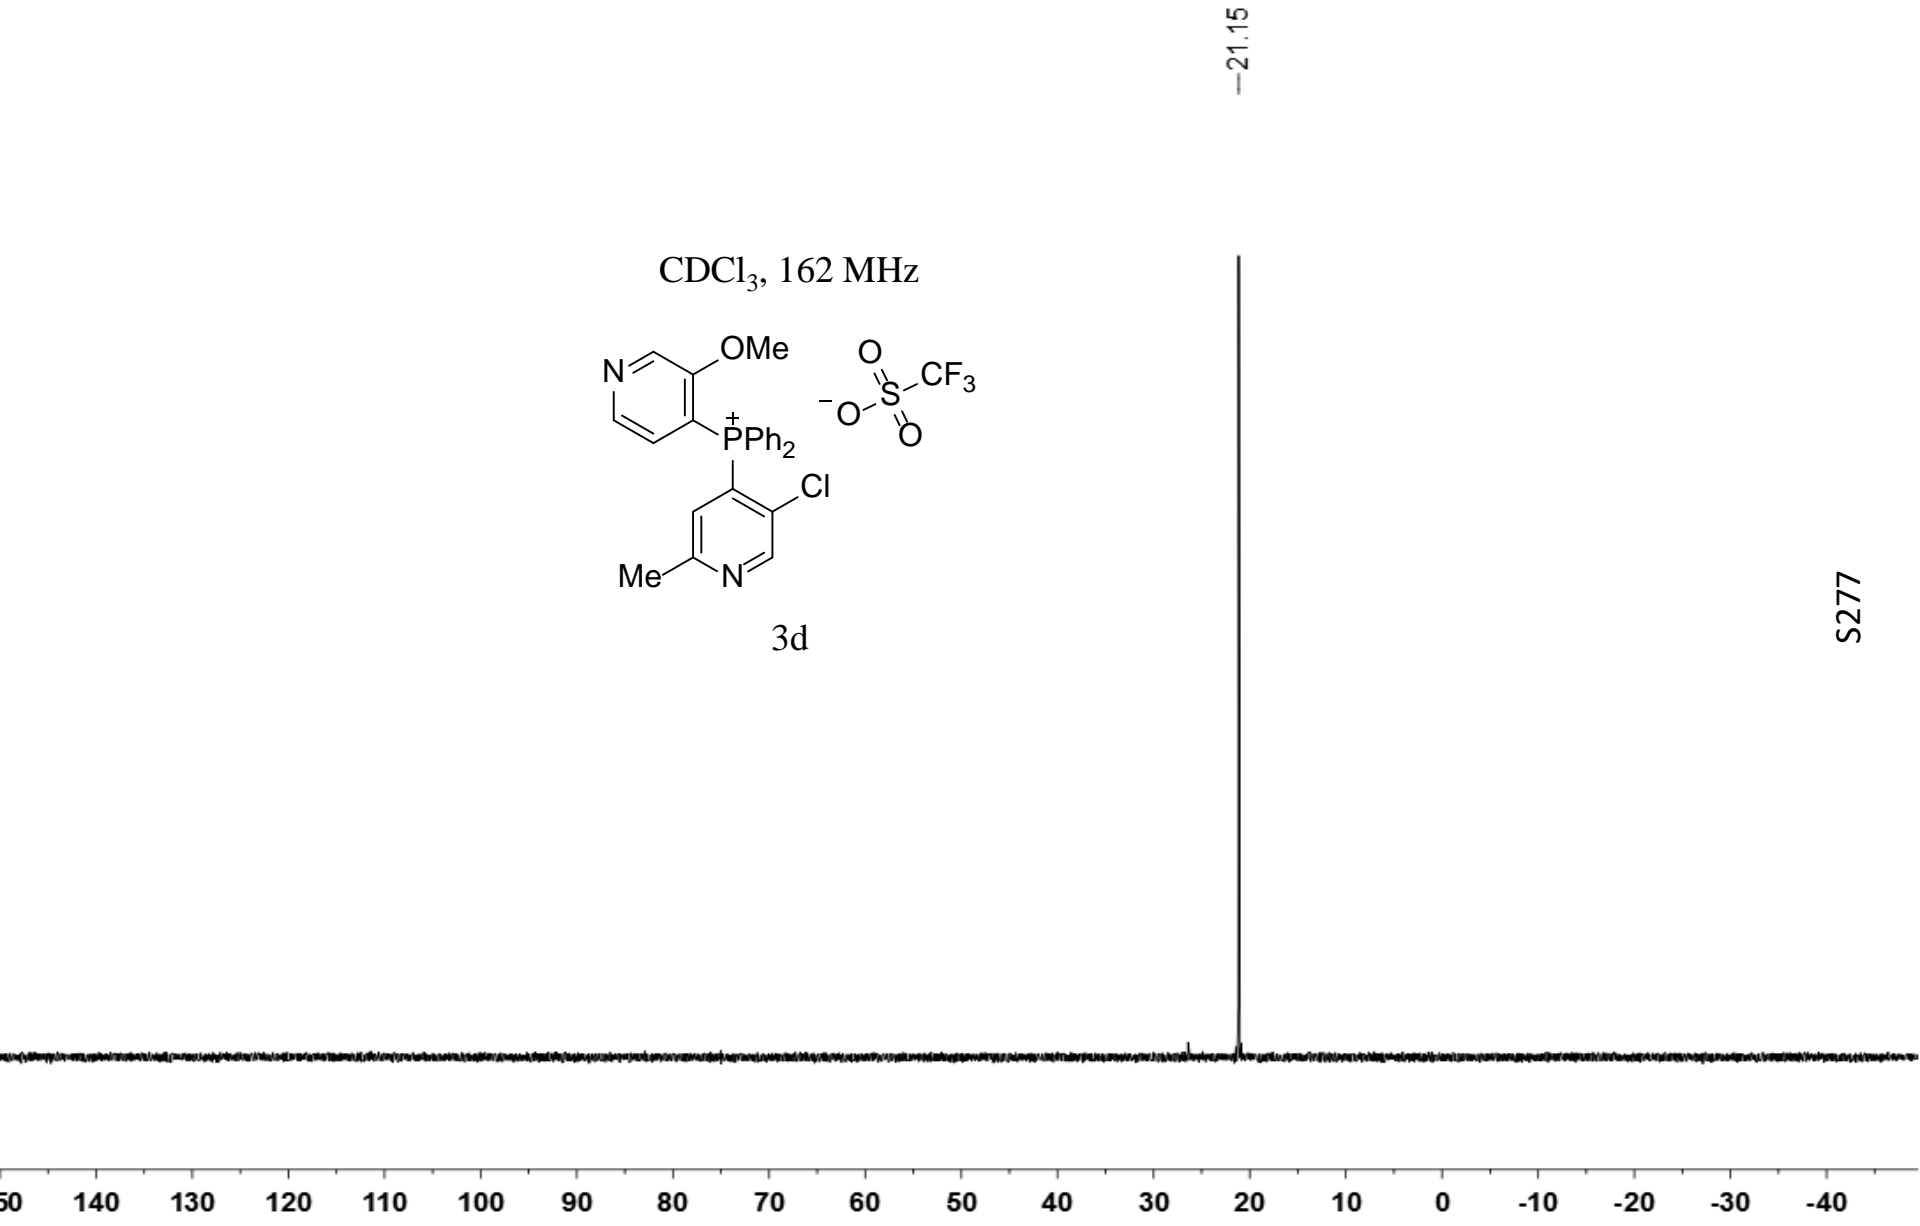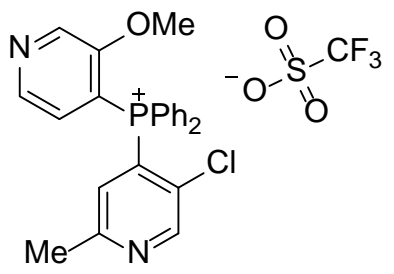

8.90  
8.89  
8.88  
8.87  
8.84  
8.83  
8.80  
8.79  
7.93  
7.91  
7.89  
7.82  
7.80  
7.80  
7.78  
7.78  
7.77  
7.75  
7.74  
7.72  
7.66  
7.62  
7.50  
7.49  
7.46  
7.45  
7.26

CDCl<sub>3</sub>, 400 MHz

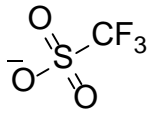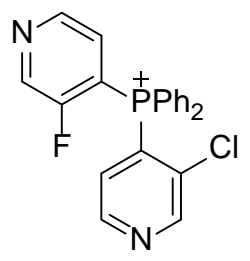

3e

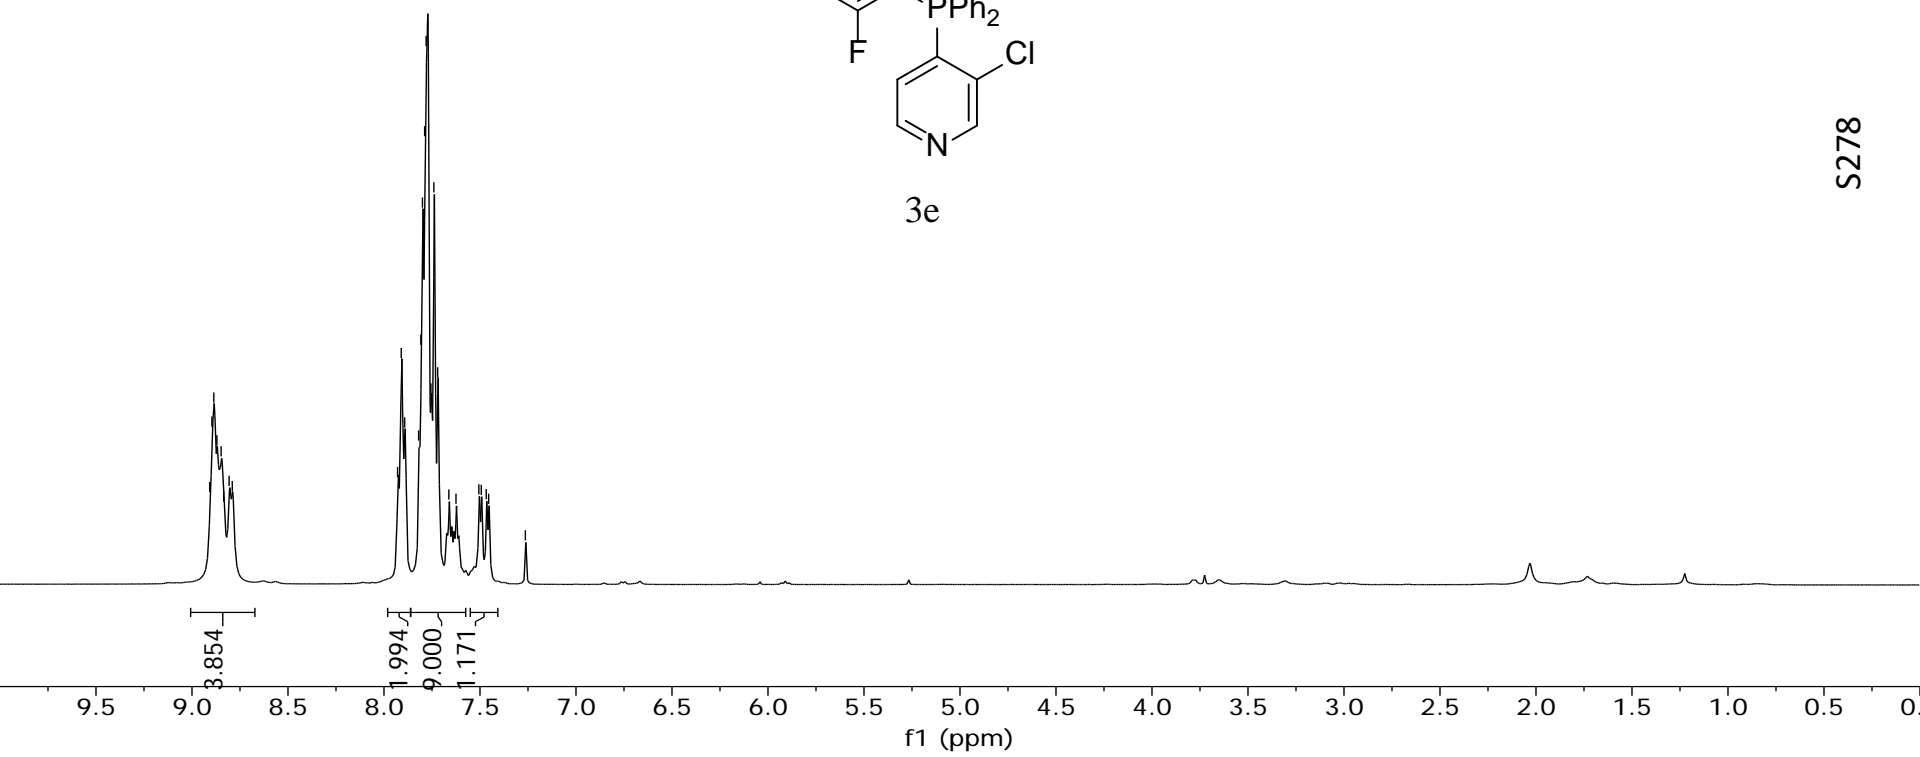

S278

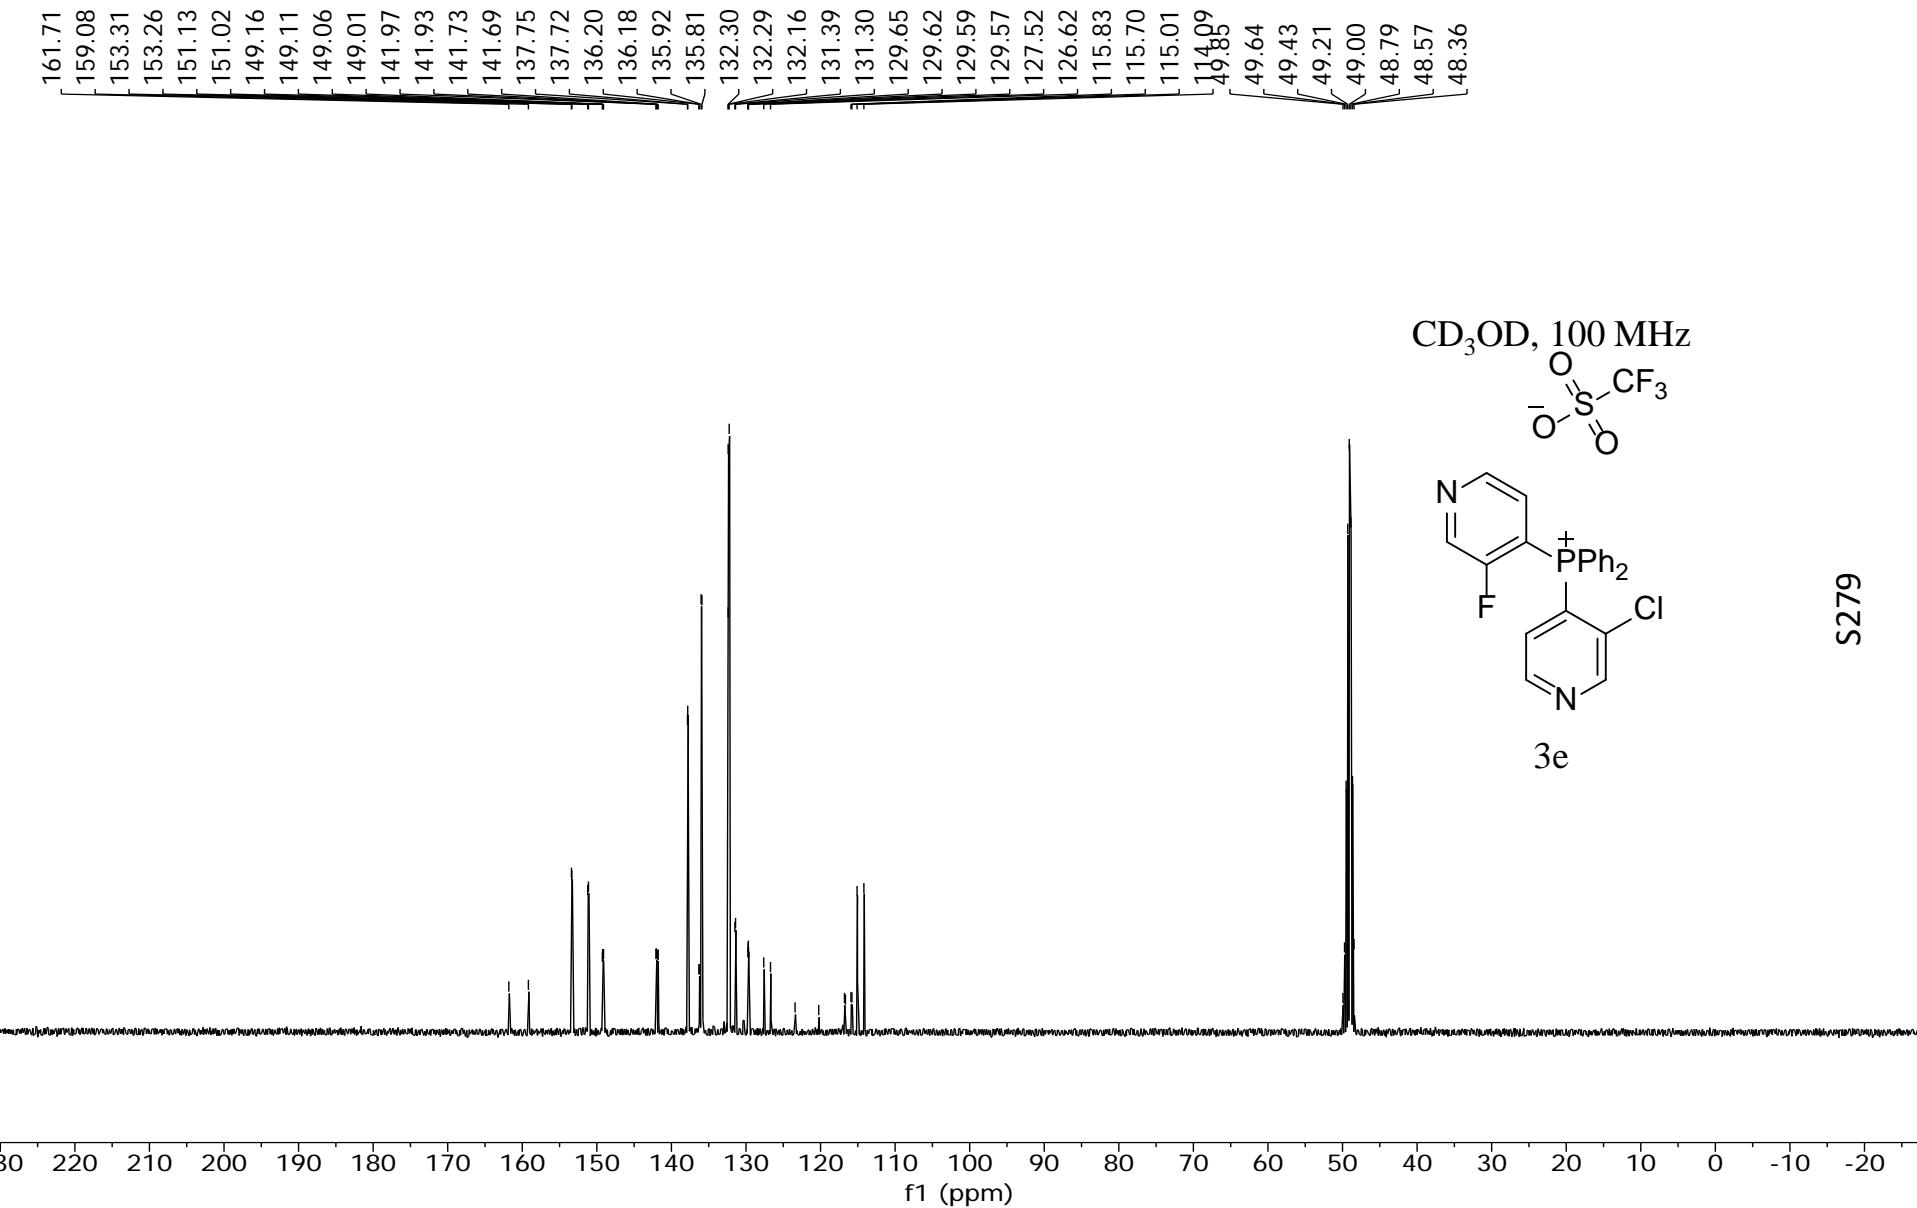

CD<sub>3</sub>OD, 365 MHz

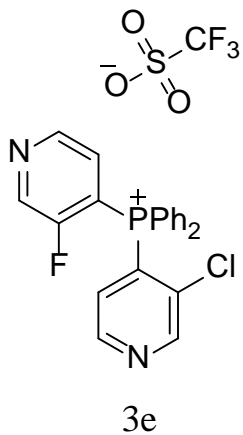

3e

-79.79

-111.00

S280

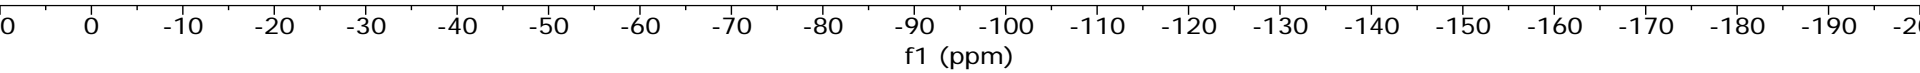



CD<sub>3</sub>OD, 162 MHz

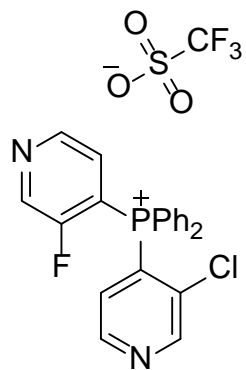

3e

19.63  
19.61

S281

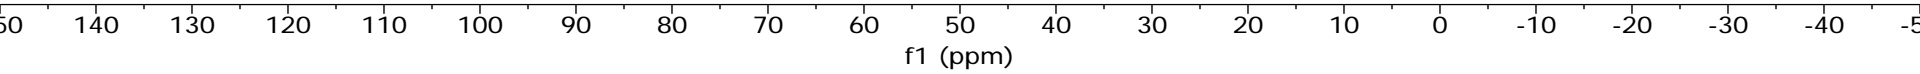

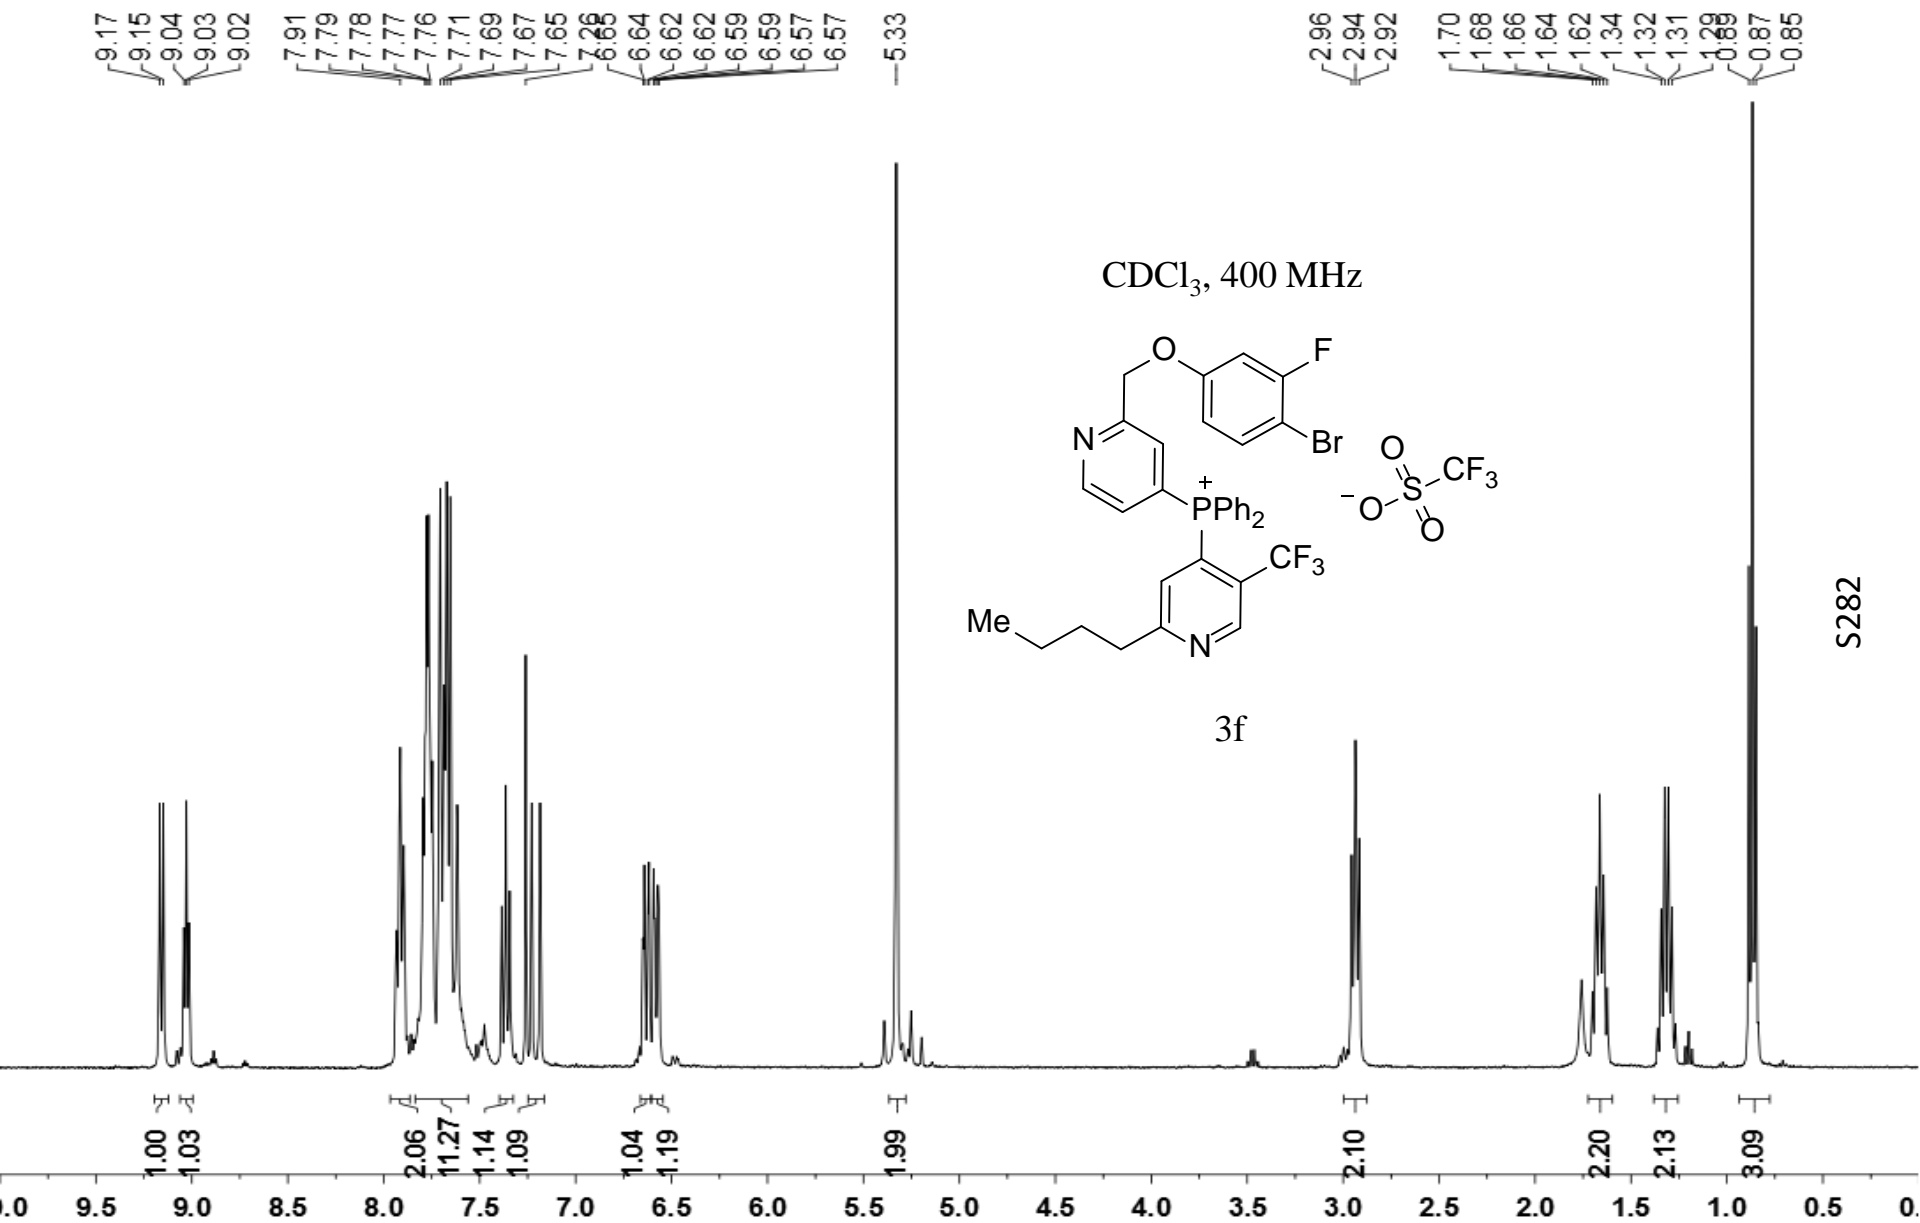

S282

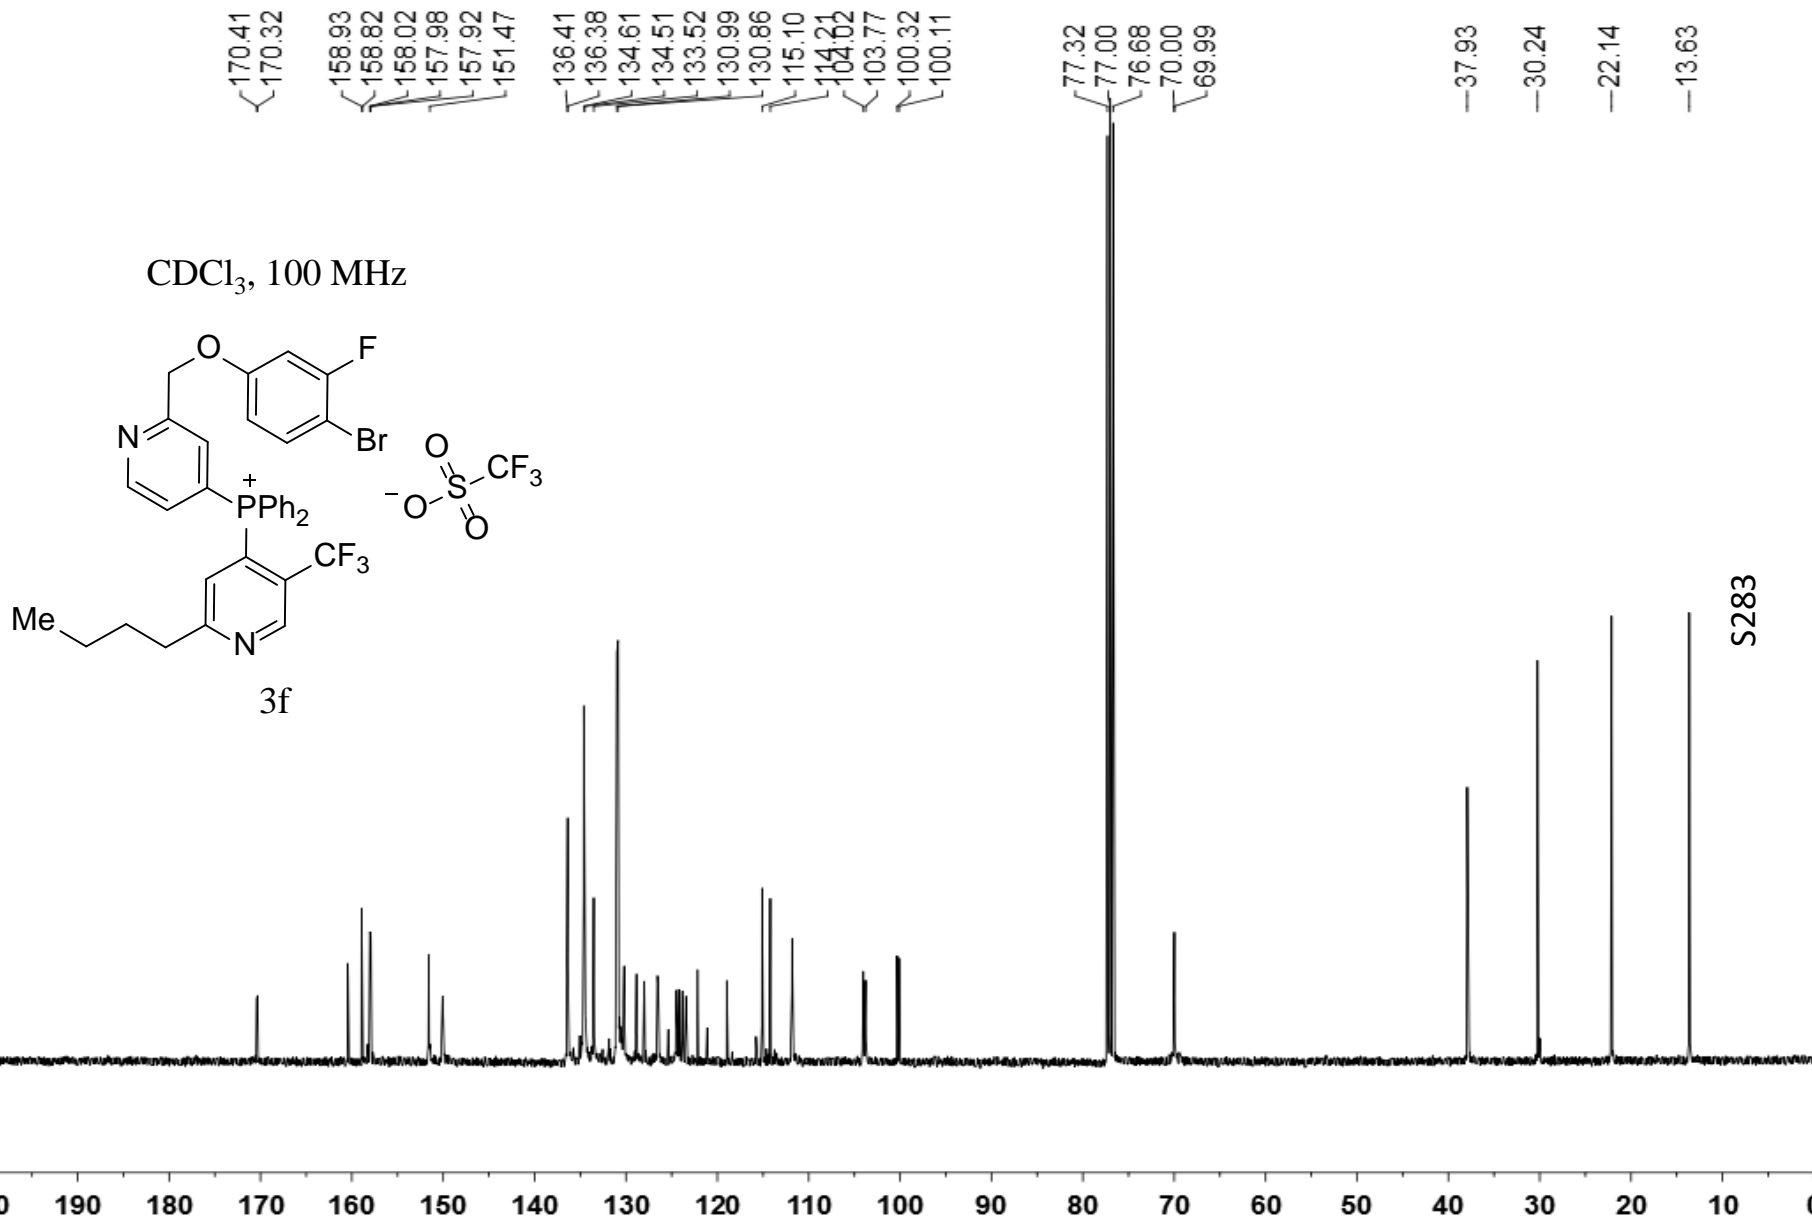

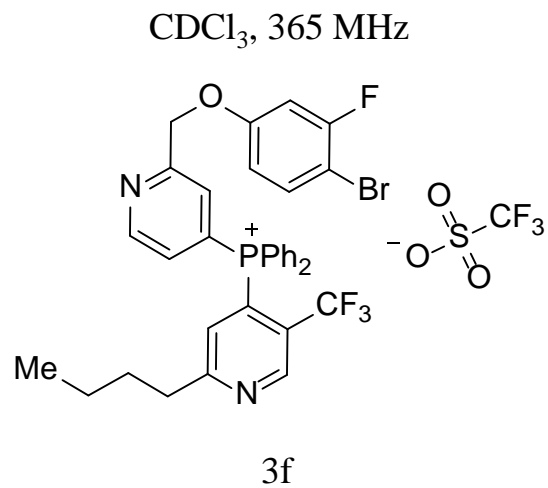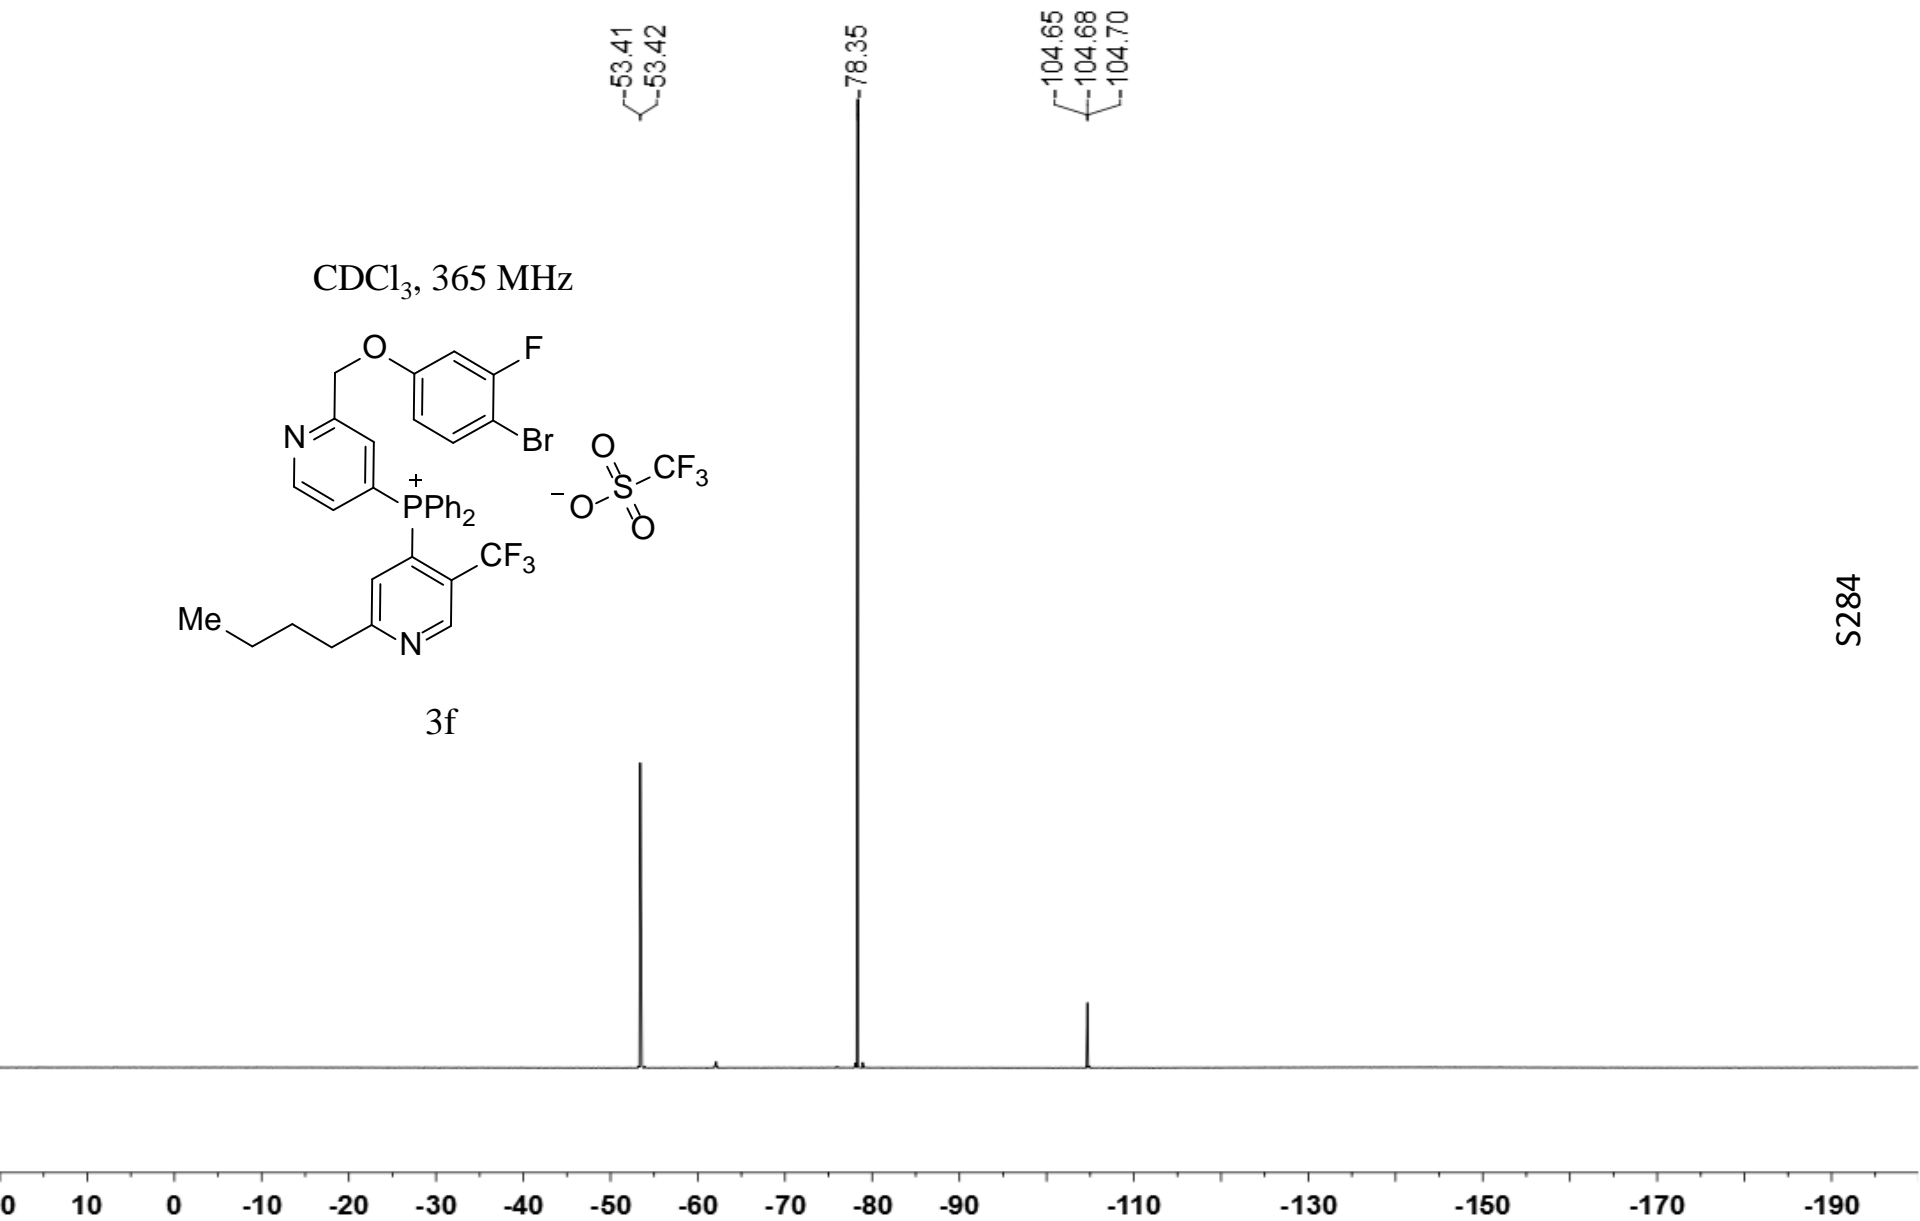

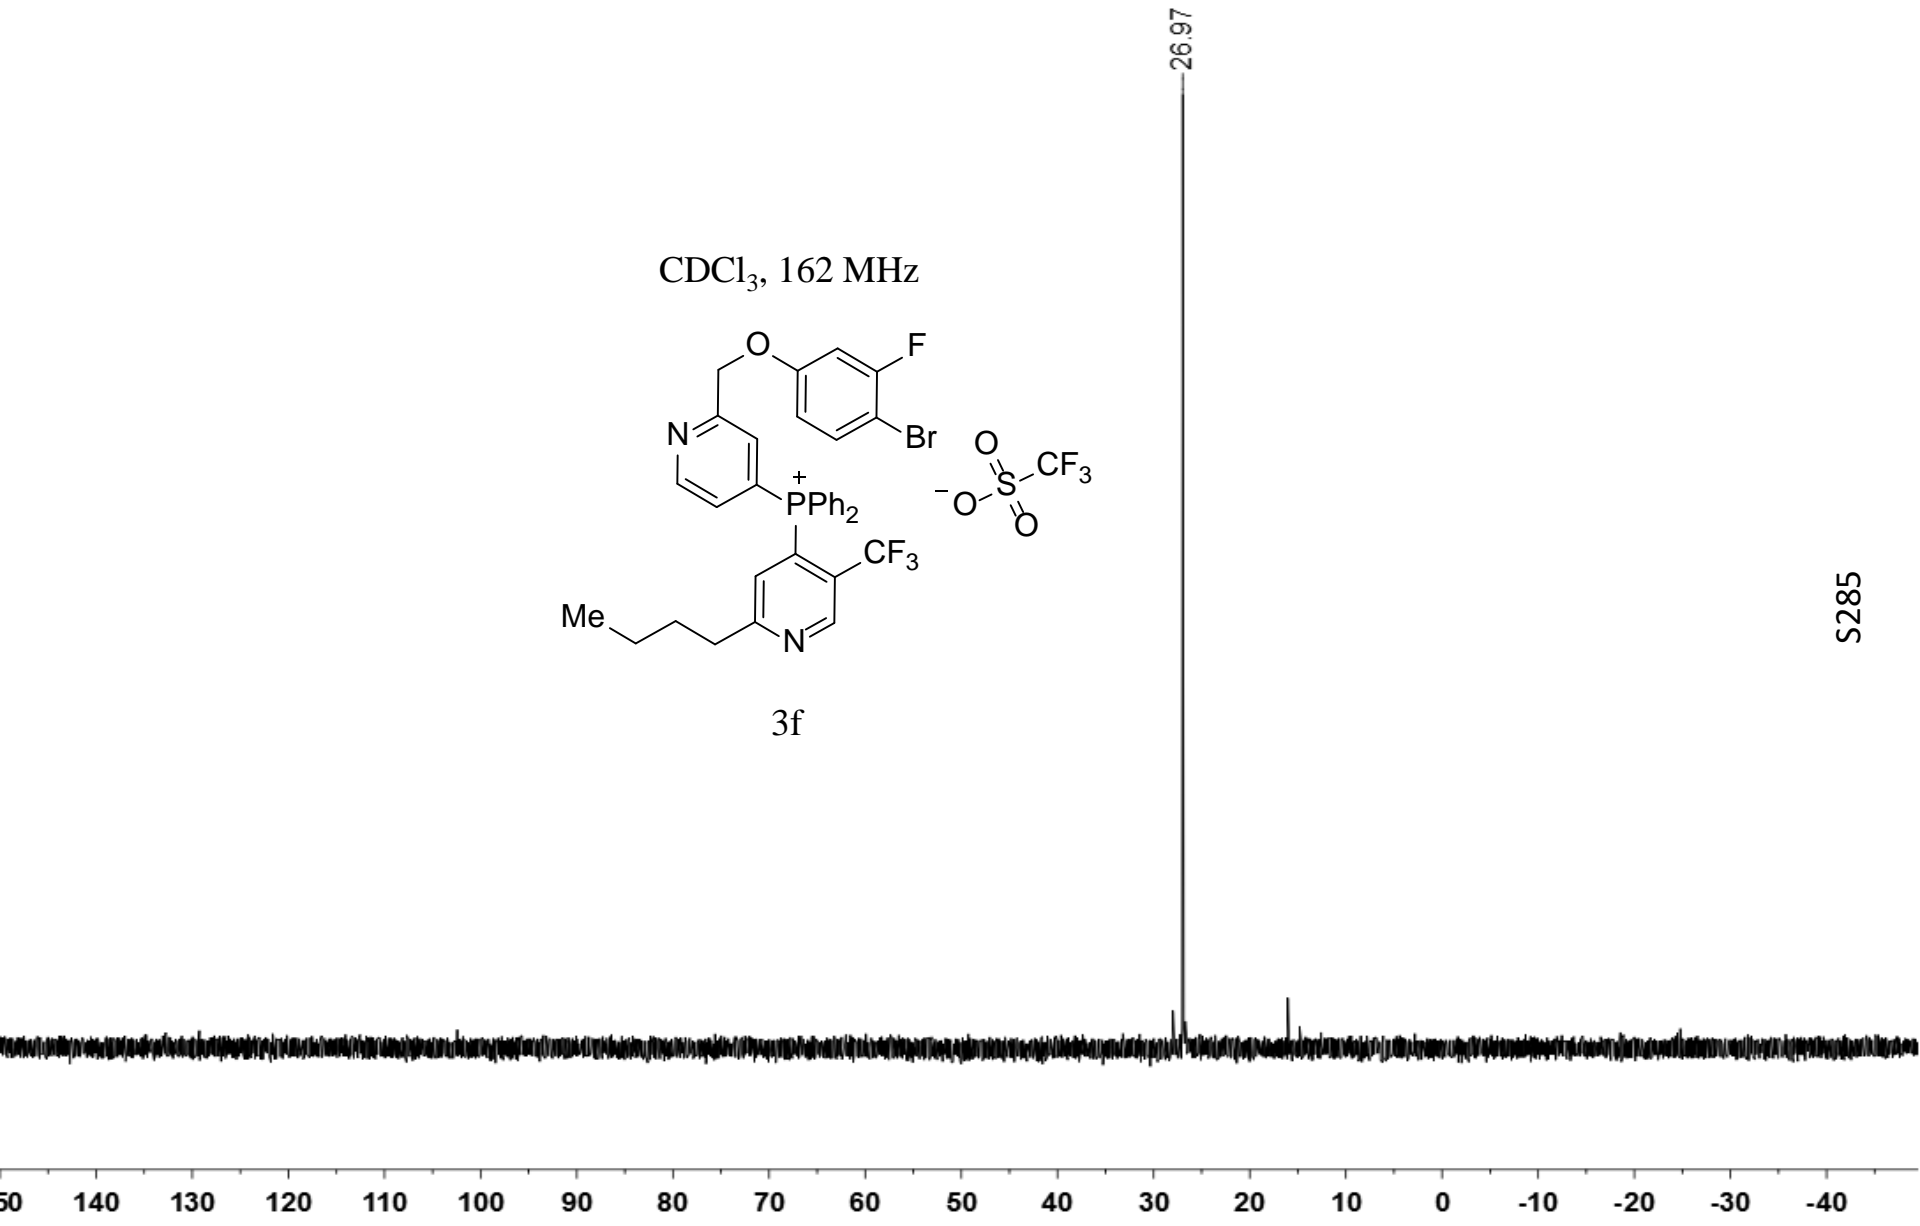

CDCl<sub>3</sub>, 162 MHz

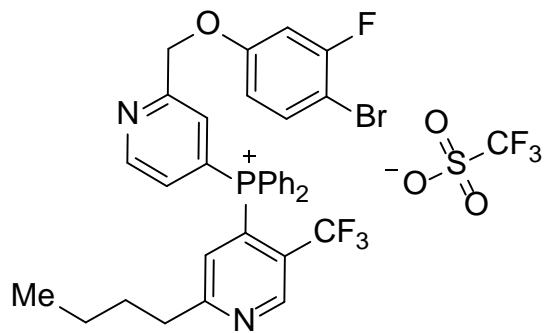

3f

26.97

S285

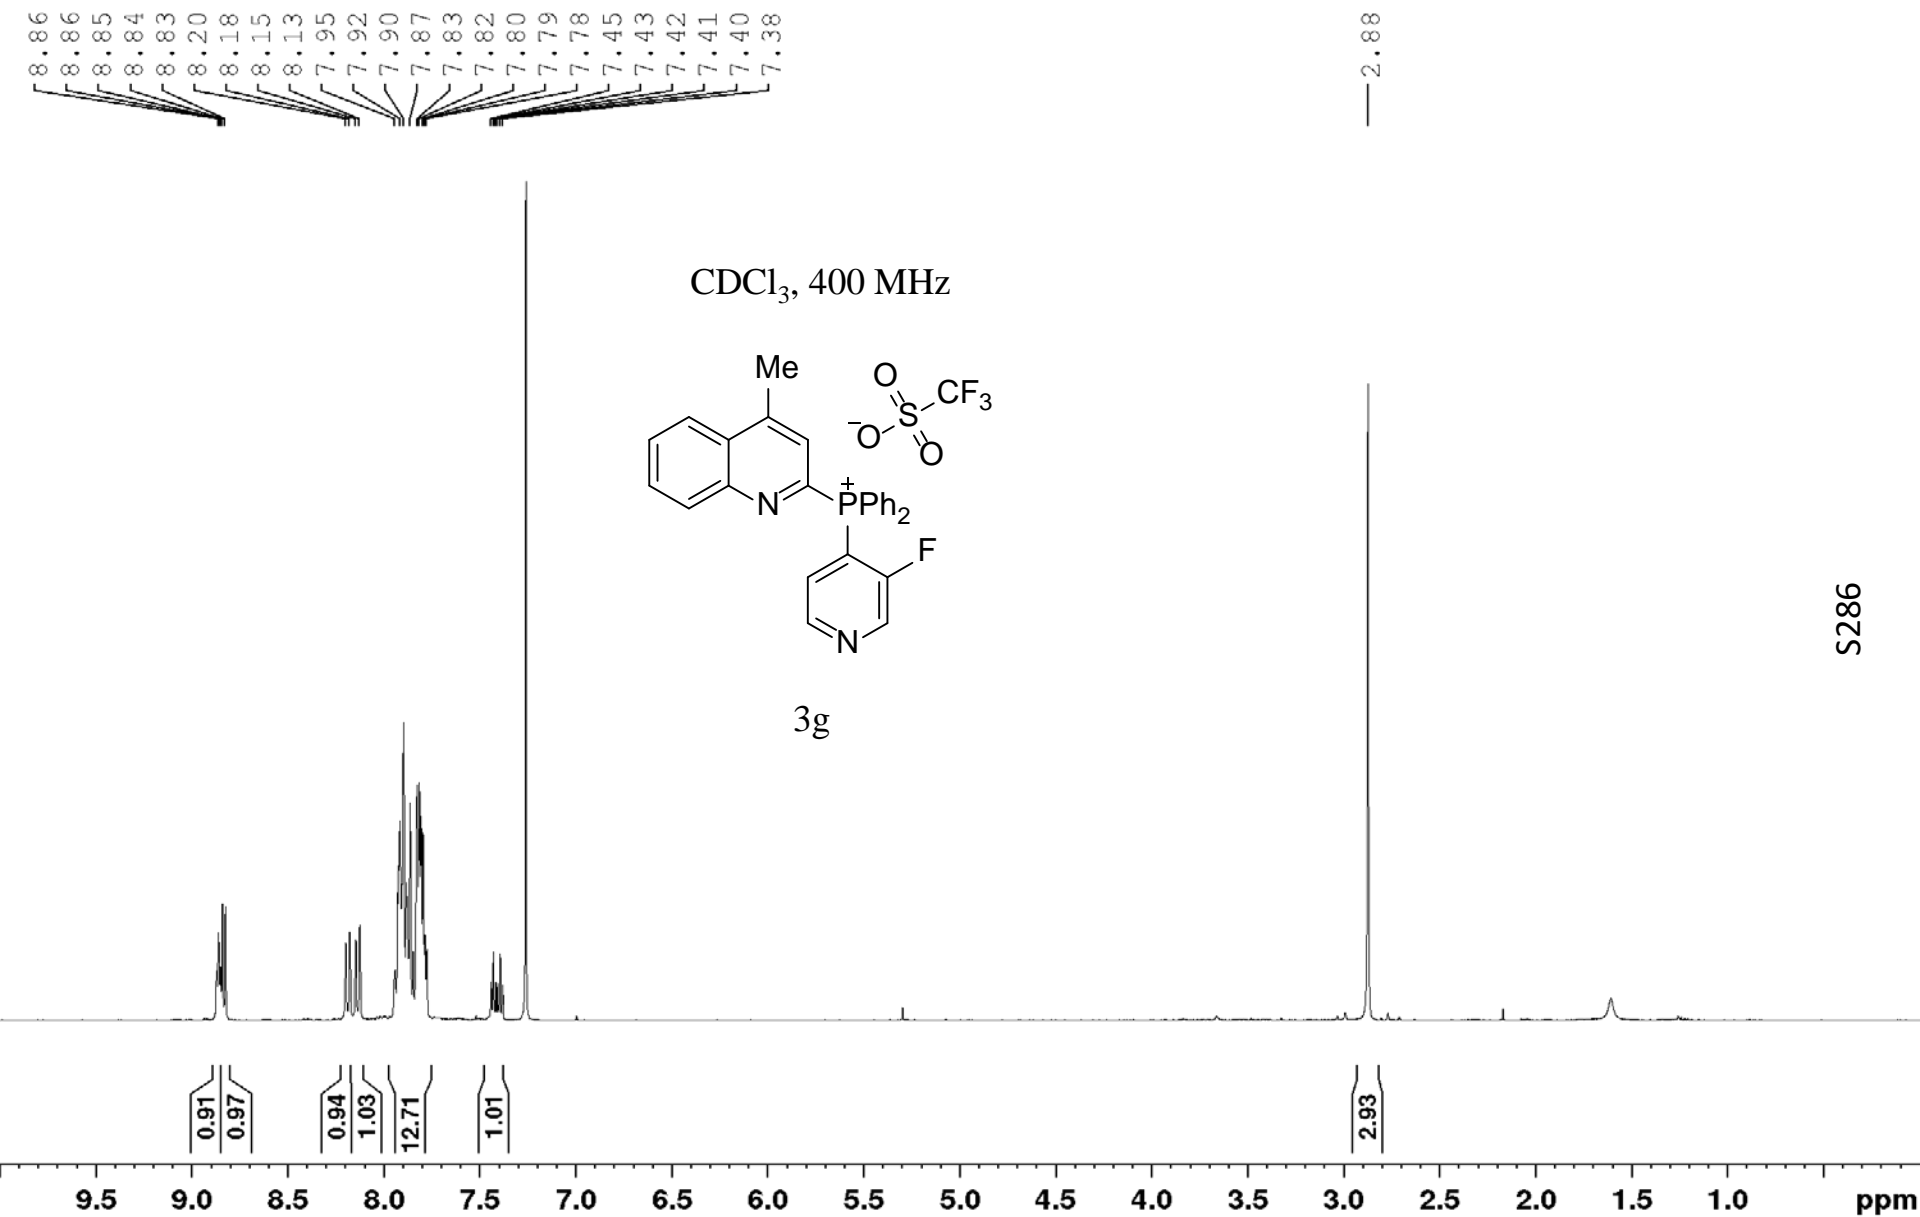

S286

160.07  
157.43  
149.10  
148.99  
148.40  
148.16  
147.94  
147.88  
147.84  
147.78  
142.92  
141.72  
139.88  
139.84  
139.64  
139.60  
136.19  
136.16  
134.42  
134.31  
131.66  
130.85  
130.72  
130.51  
130.45  
128.94  
128.91  
128.47  
128.41  
124.76  
124.48  
124.37  
124.36  
122.21  
119.01  
116.75  
116.62  
115.91  
115.77  
114.90  
114.02

19.03  
19.01

CDCl<sub>3</sub>, 100 MHz

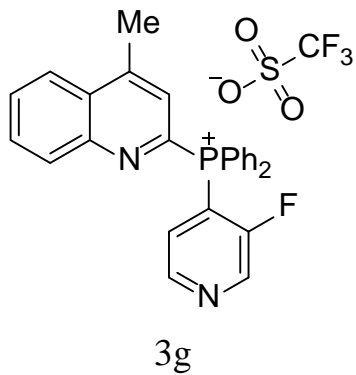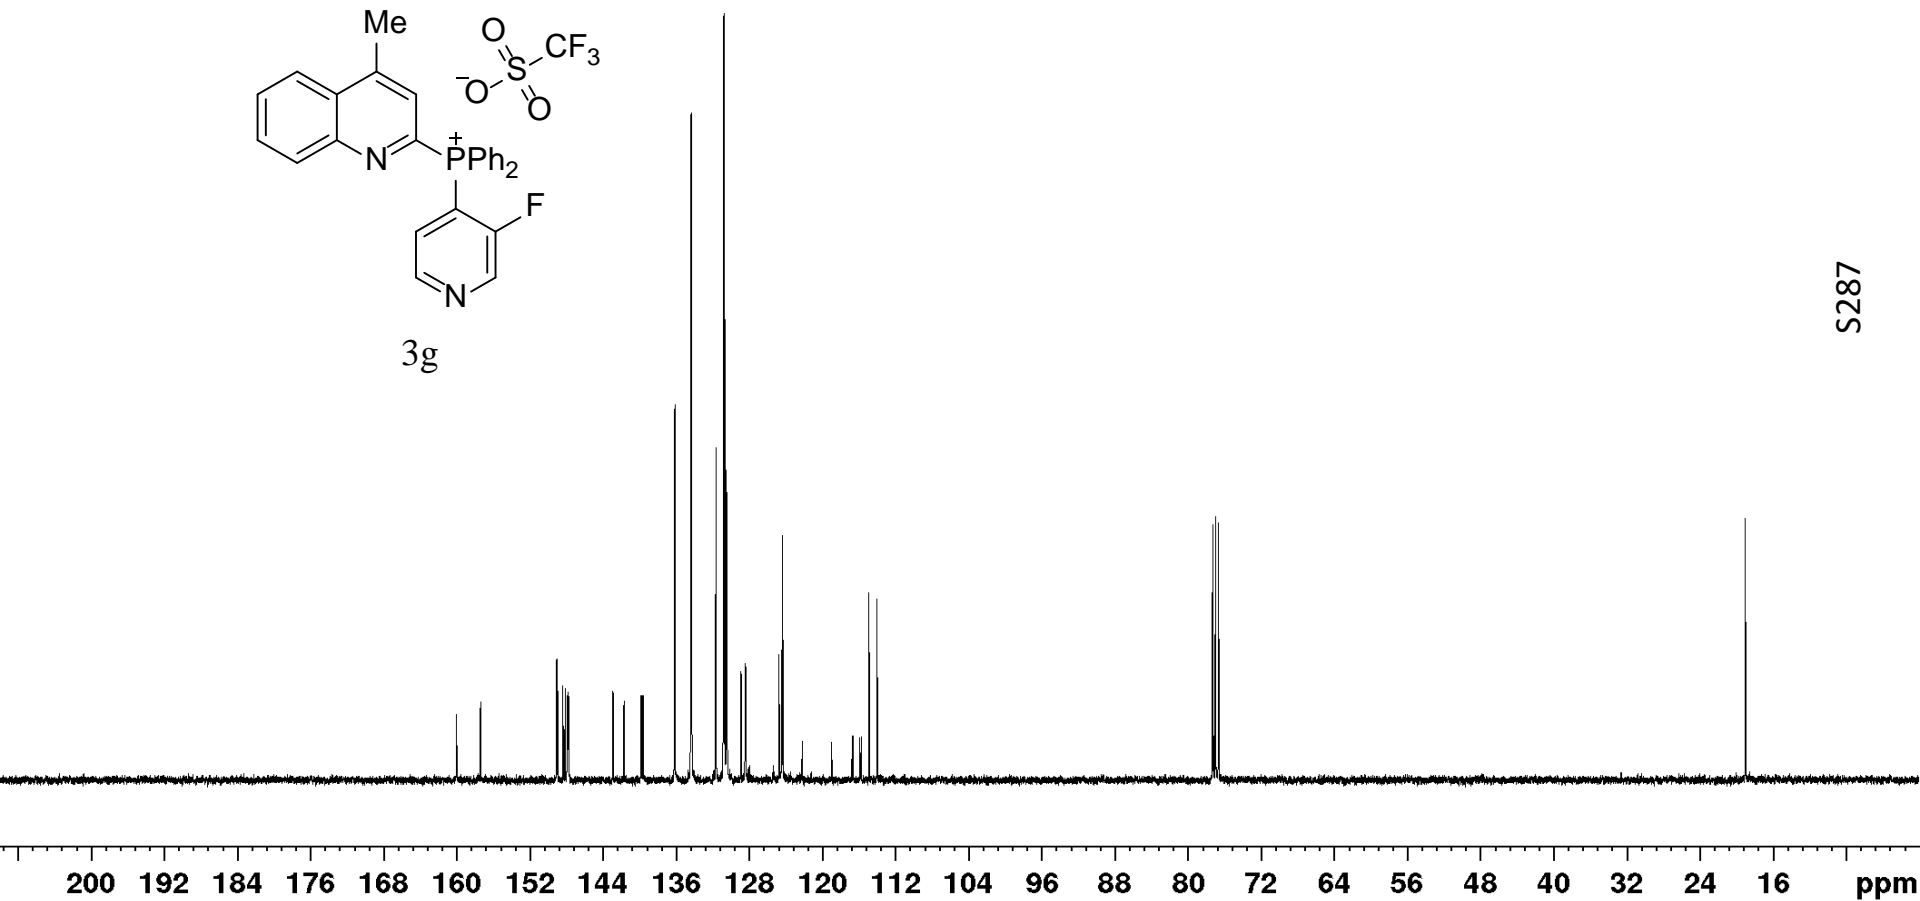

S287

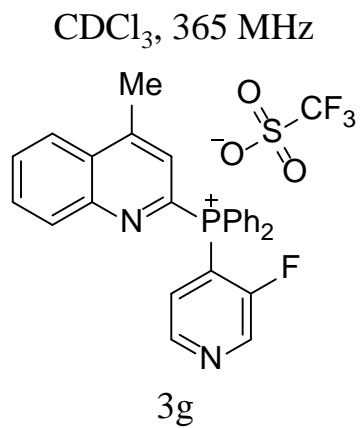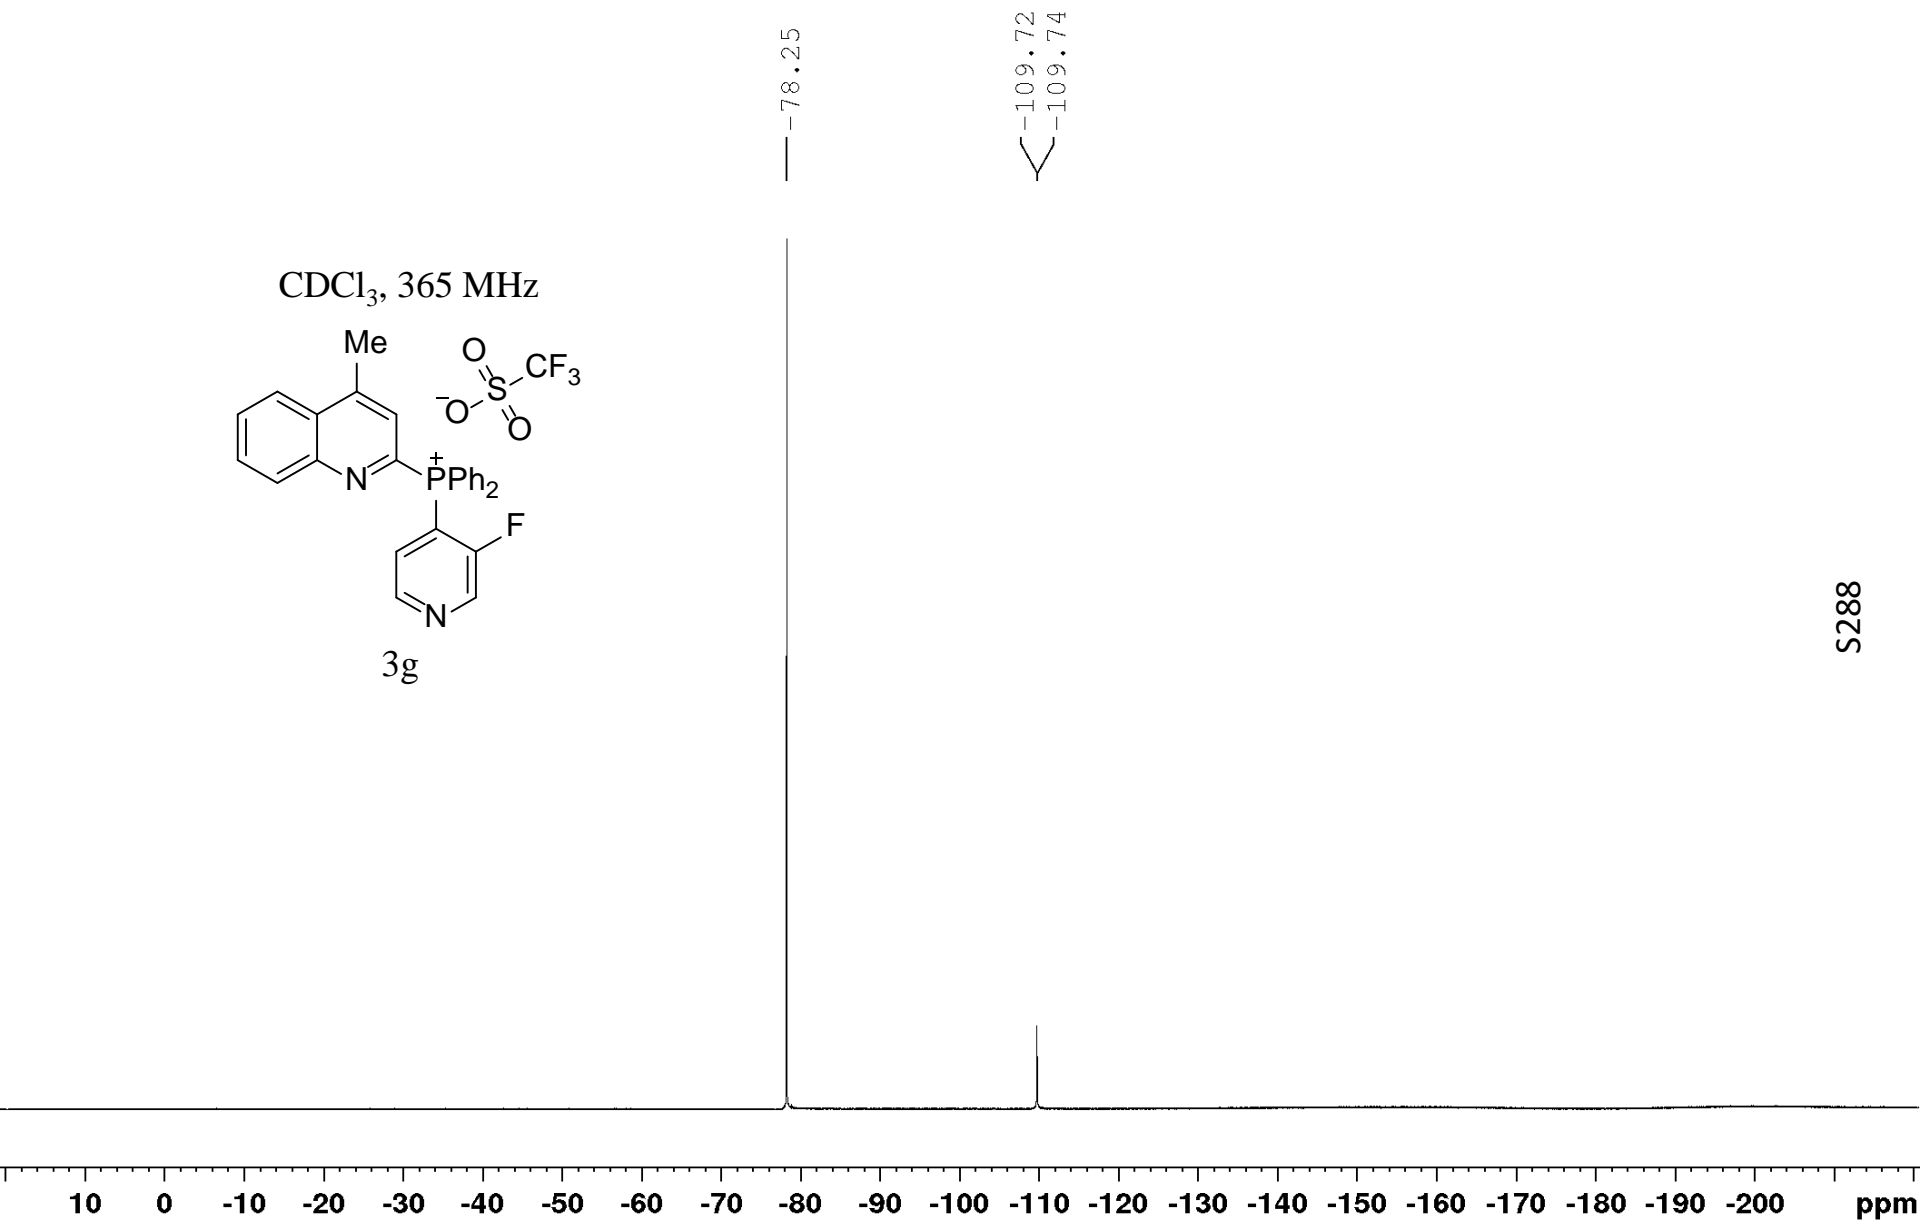

S288



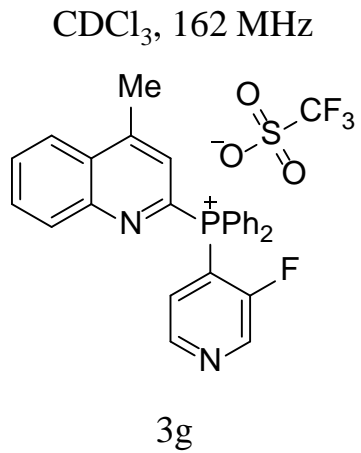

—11.79

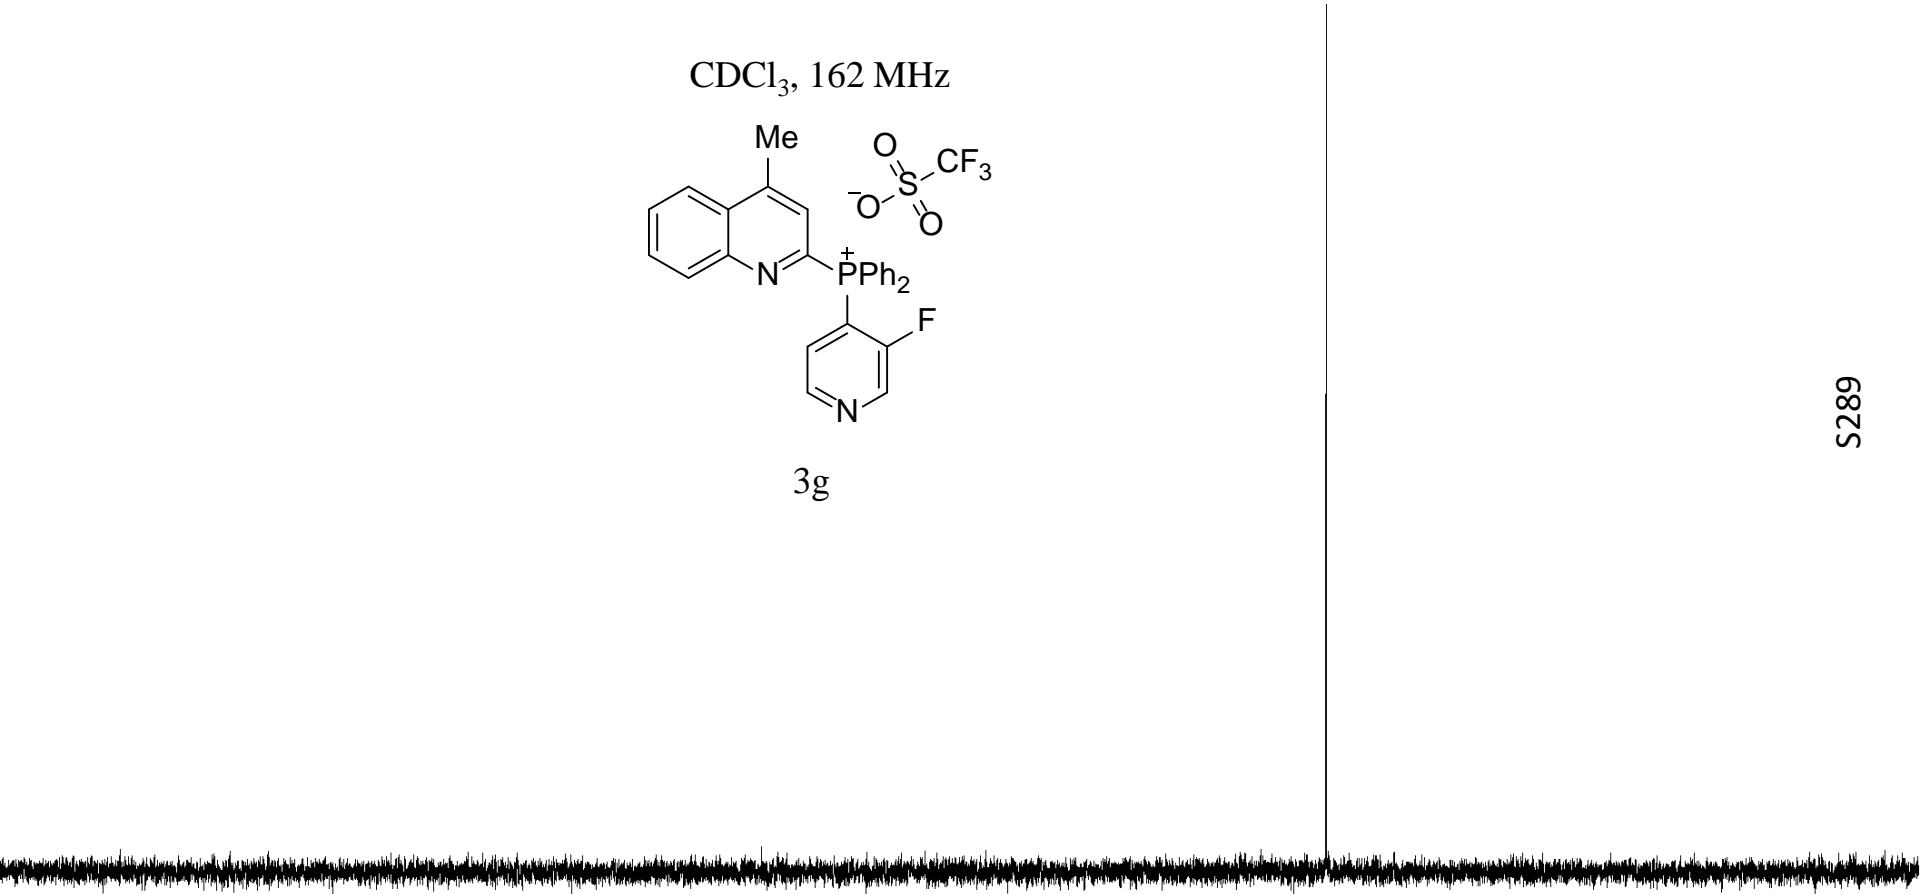

140 130 120 110 100 90 80 70 60 50 40 30 20 10 0 -10 -20 -30 ppm

S289

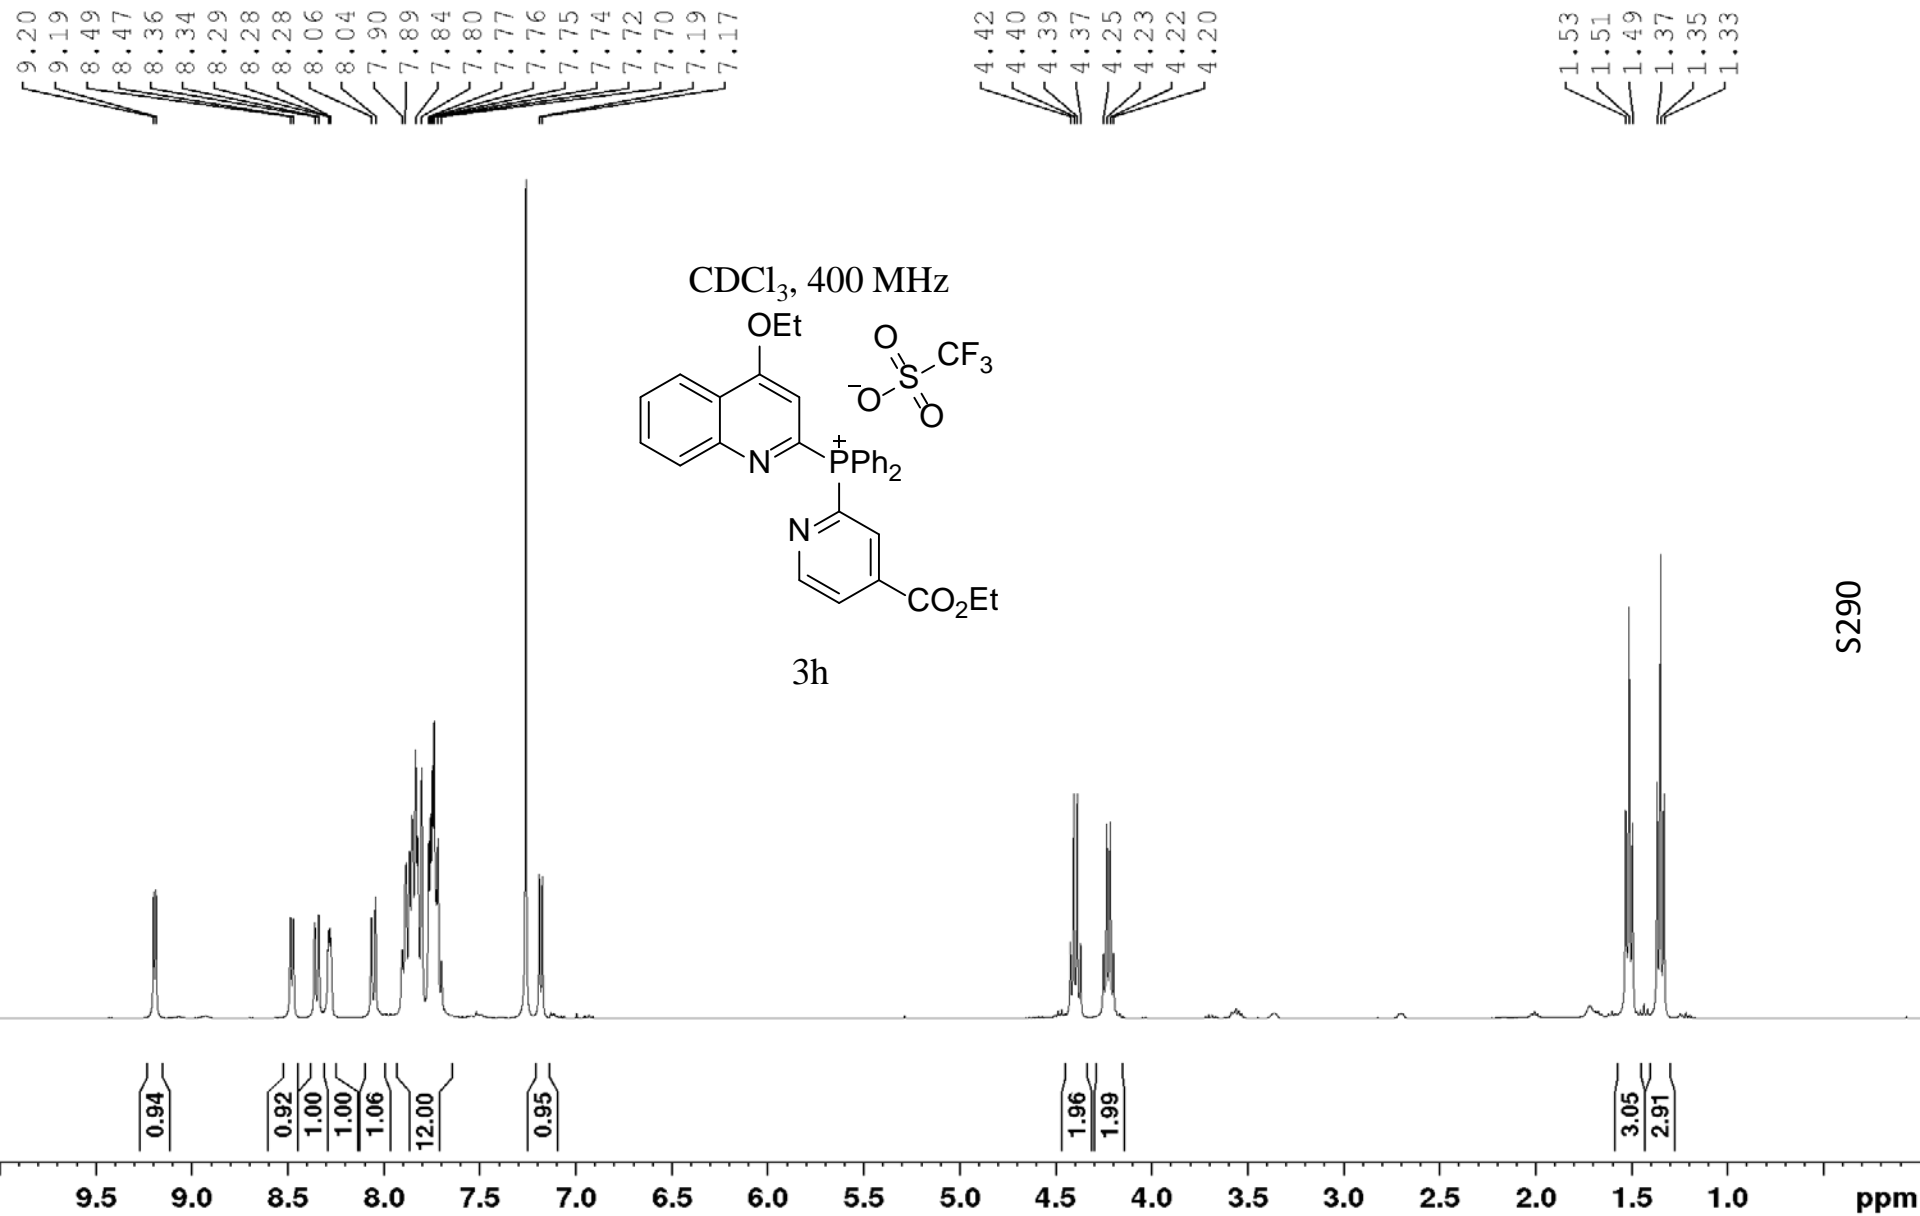

163.53  
163.39  
163.17  
163.14  
153.42  
153.22  
149.72  
149.46  
146.47  
145.68  
145.27  
144.50  
139.57  
139.46  
135.77  
135.74  
134.96  
134.86  
131.83  
131.38  
131.14  
130.51  
130.38  
129.40  
129.39  
129.22  
127.49  
127.46  
122.66  
122.38  
121.94  
121.91  
119.19  
117.10  
116.22  
106.06  
105.78

65.83  
62.74

14.04  
13.92

CDCl<sub>3</sub>, 100 MHz

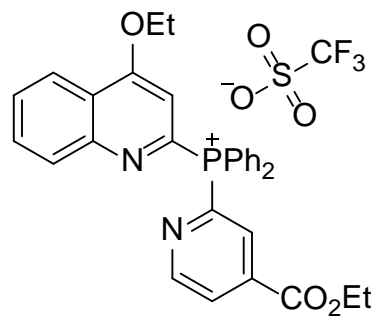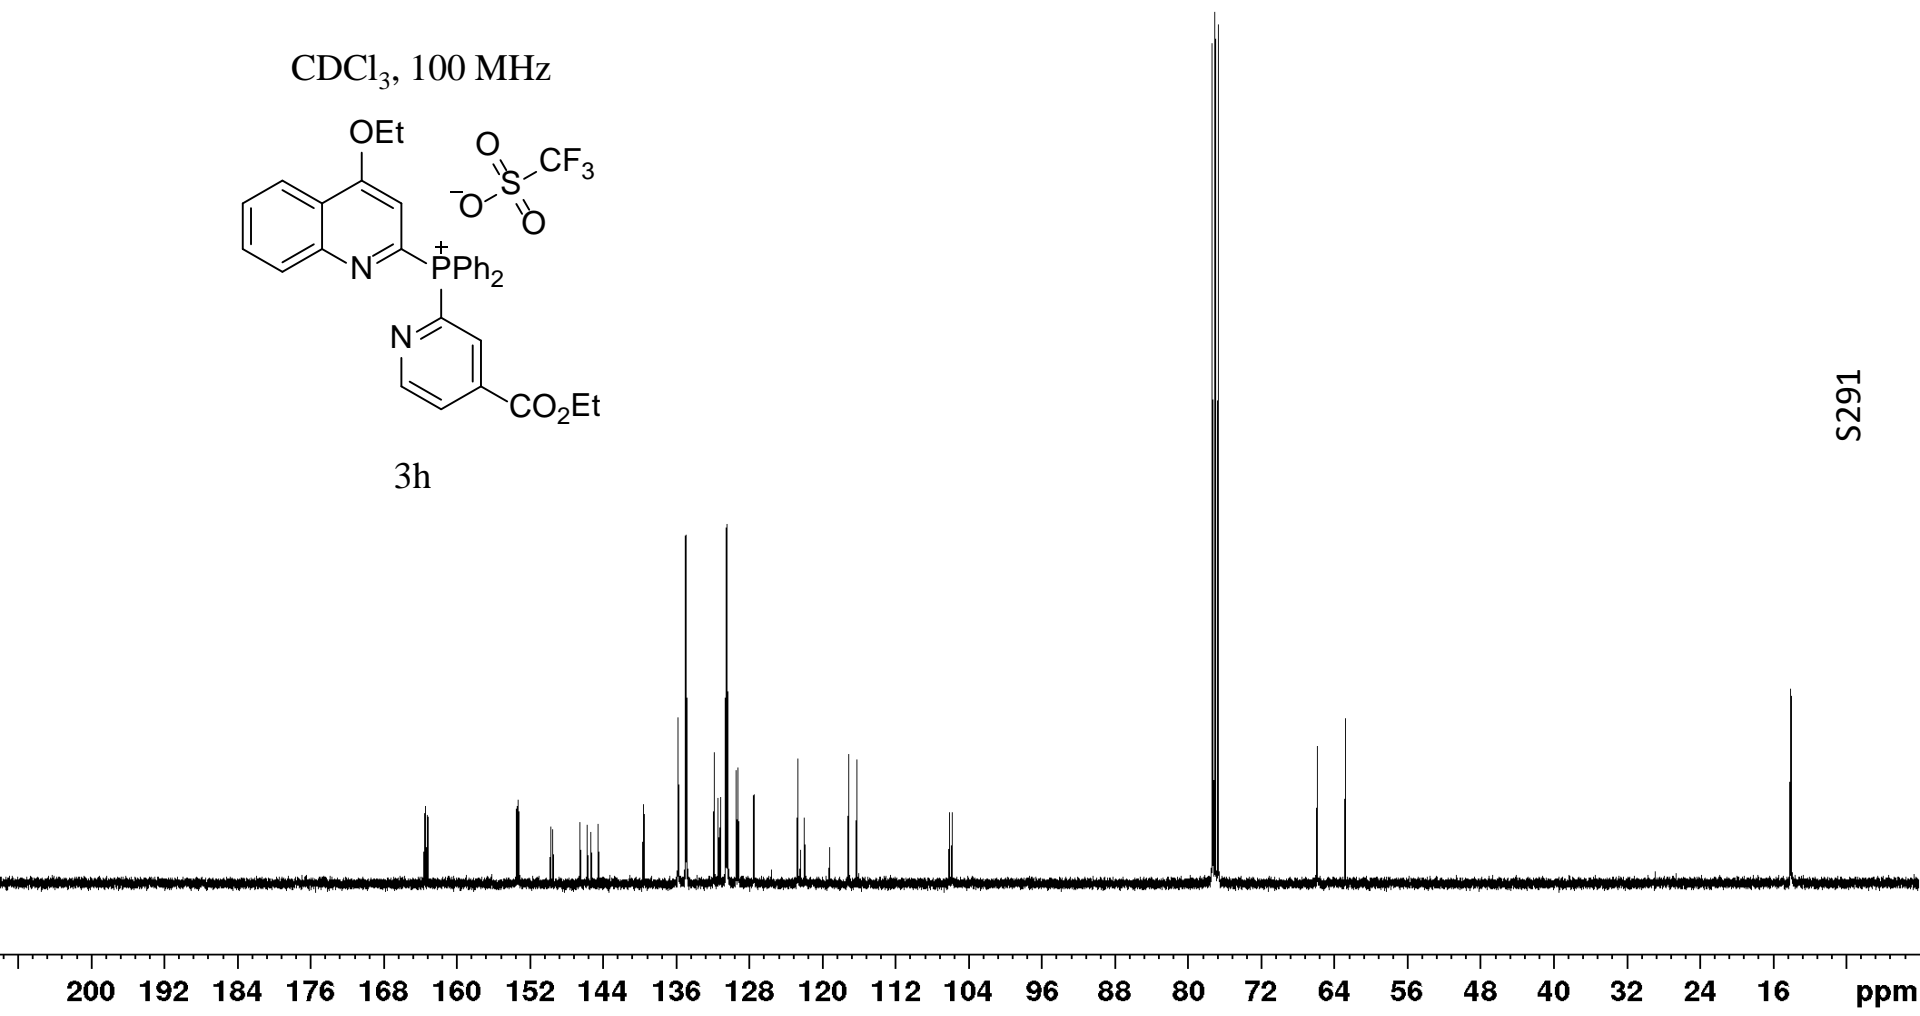

S291

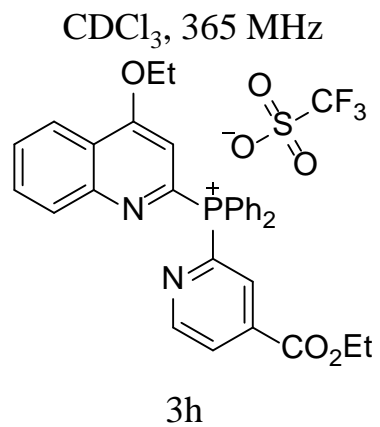

— -78.25

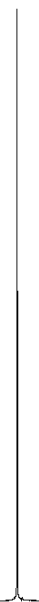

S292

10 0 -10 -20 -30 -40 -50 -60 -70 -80 -90 -100 -110 -120 -130 -140 -150 -160 -170 -180 ppm

CDCl<sub>3</sub>, 162 MHz

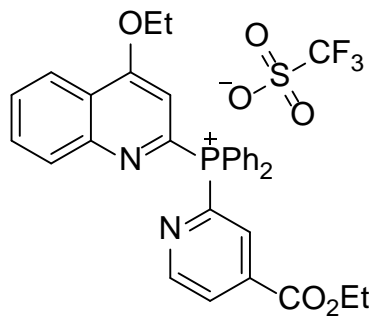

3h

— 9.58

S293

140 130 120 110 100 90 80 70 60 50 40 30 20 10 0 -10 -20 -30 ppm

9.20  
9.19  
8.49  
8.47  
8.36  
8.34  
8.29  
8.28  
8.28  
8.06  
8.04  
7.90  
7.89  
7.84  
7.80  
7.77  
7.76  
7.75  
7.74  
7.72  
7.70  
7.19  
7.17

4.42  
4.40  
4.39  
4.37  
4.25  
4.23  
4.22  
4.20

1.53  
1.51  
1.49  
1.37  
1.35  
1.33

CDCl<sub>3</sub>, 400 MHz

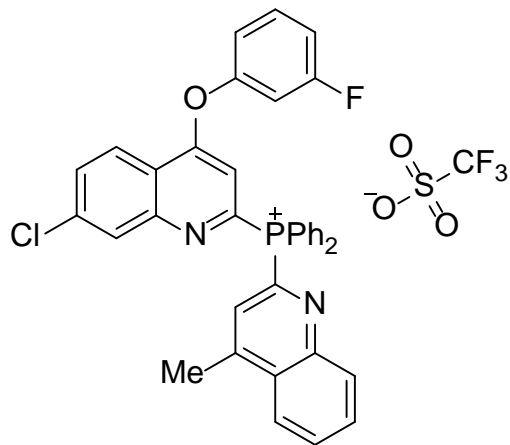

3i

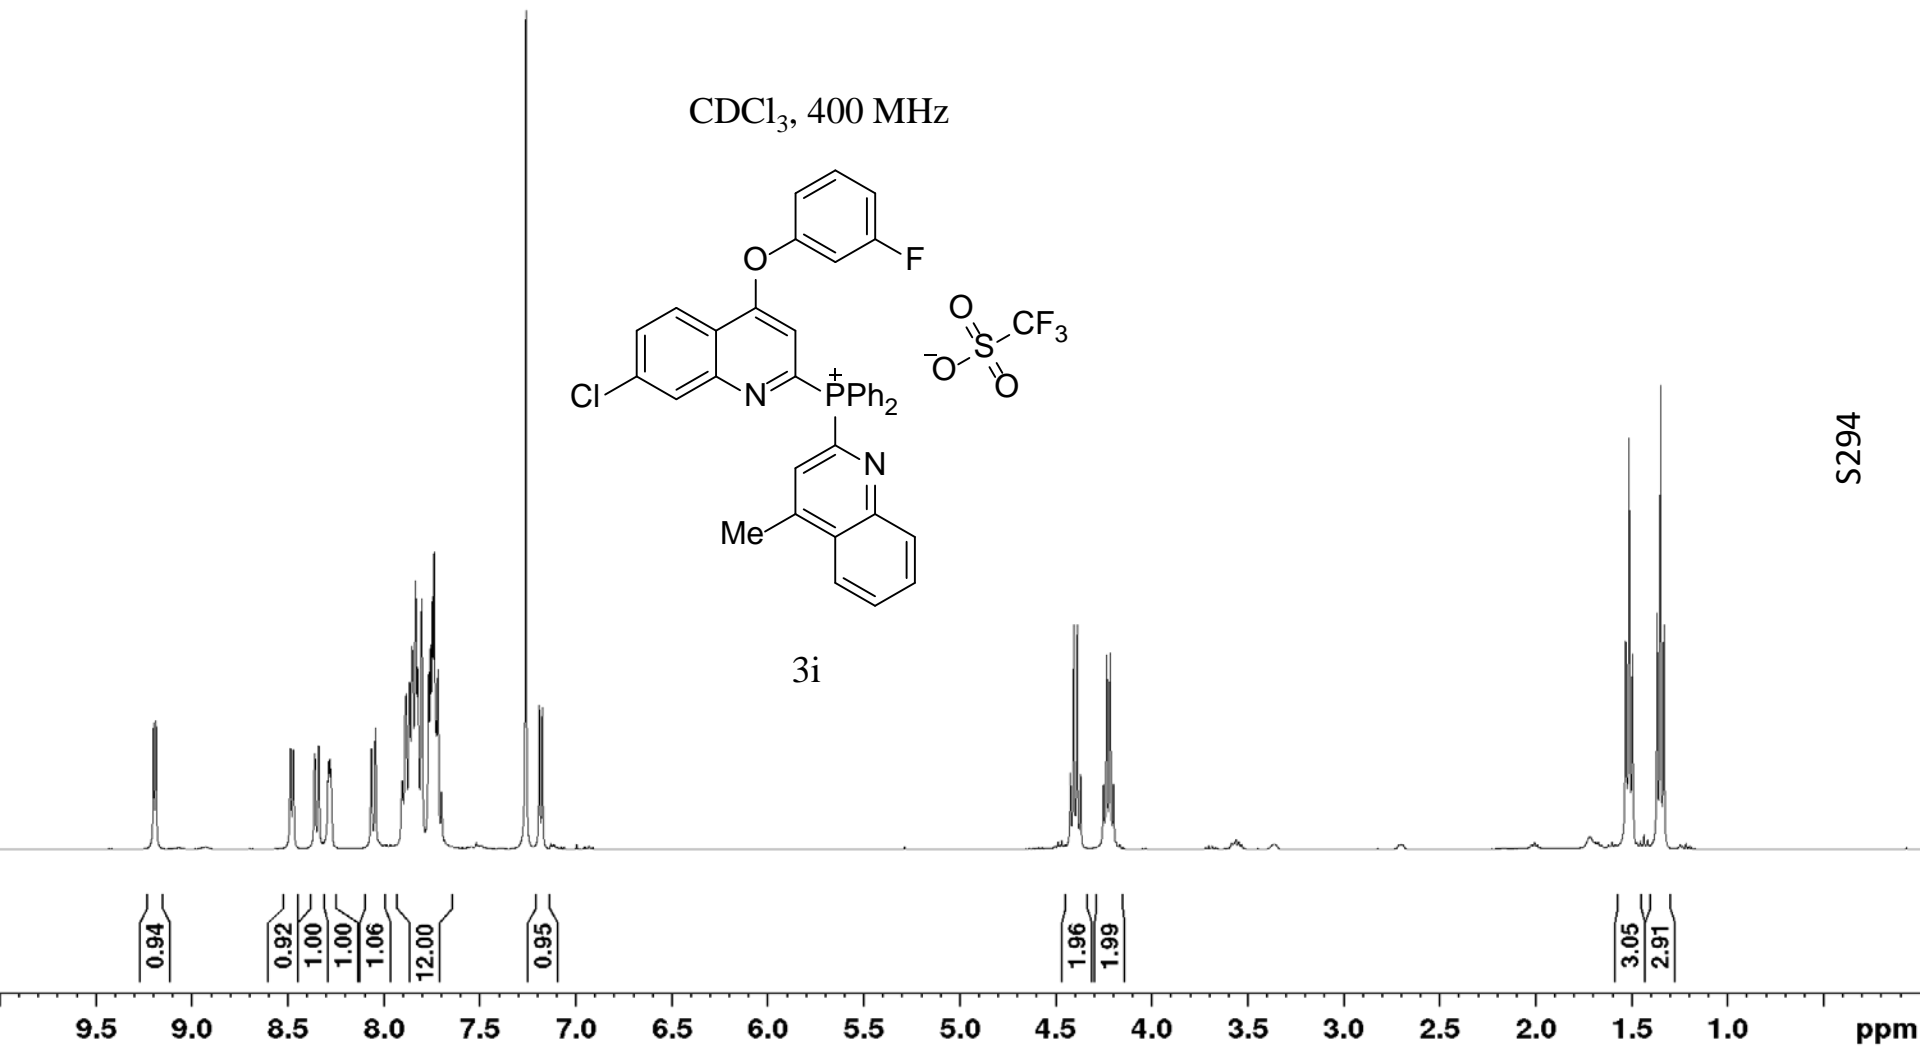

S294

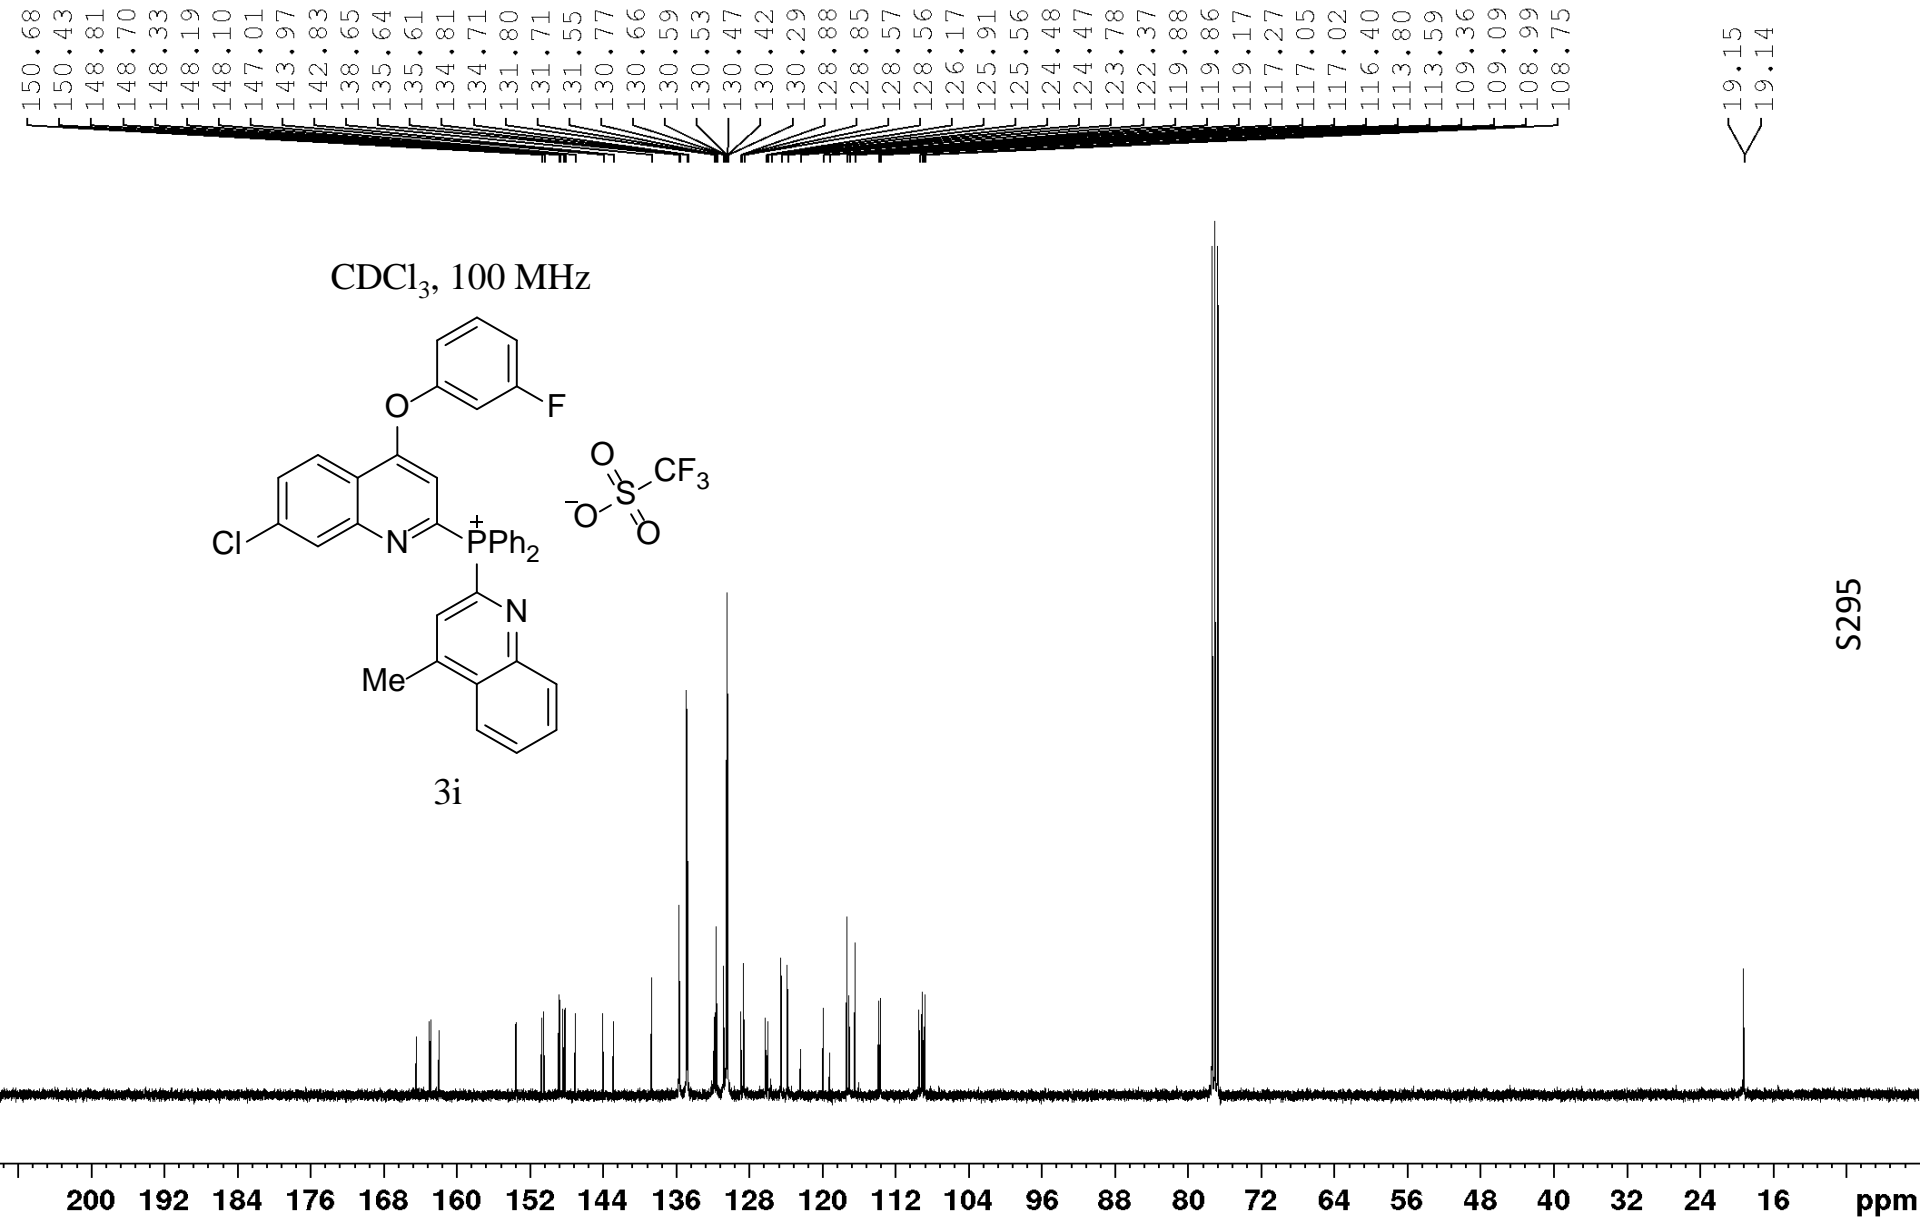

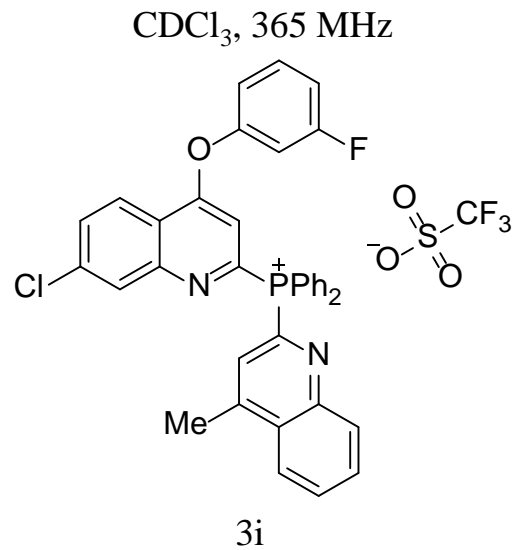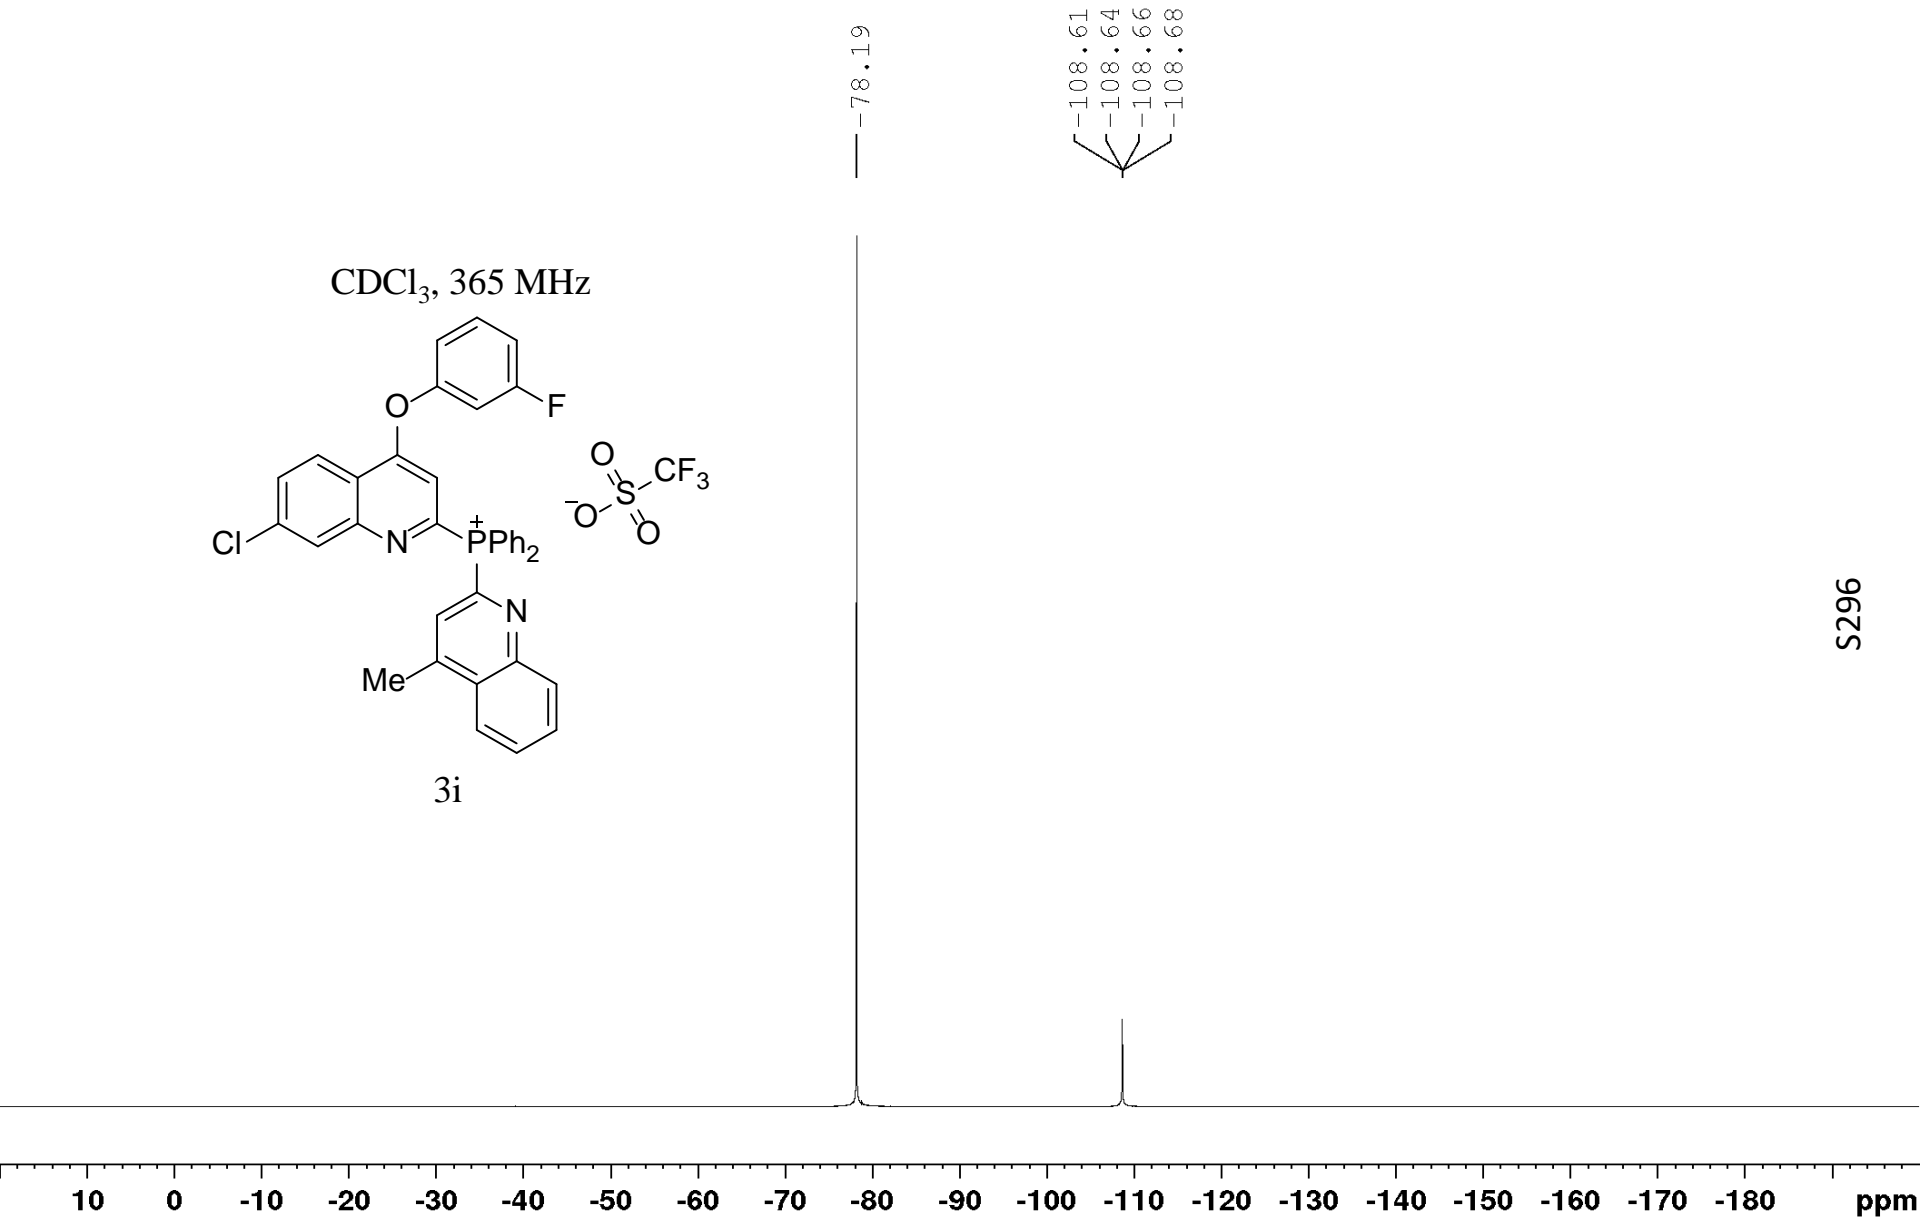



CDCl<sub>3</sub>, 162 MHz

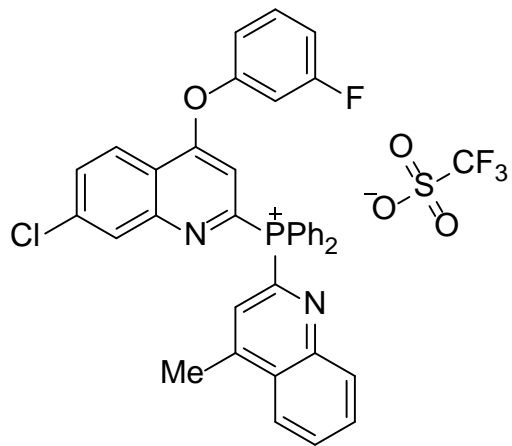

3i

— 8.06

S297

140 130 120 110 100 90 80 70 60 50 40 30 20 10 0 -10 -20 -30 ppm

8.92  
8.91  
8.90  
8.17  
8.14  
7.91  
7.85  
7.83  
7.83  
7.81  
7.81  
7.78  
7.77  
7.76  
7.65  
7.26

2.94  
2.93  
2.91  
2.83

1.56  
1.54  
1.53  
1.51

0.86  
0.84  
0.83

CDCl<sub>3</sub>, 400 MHz

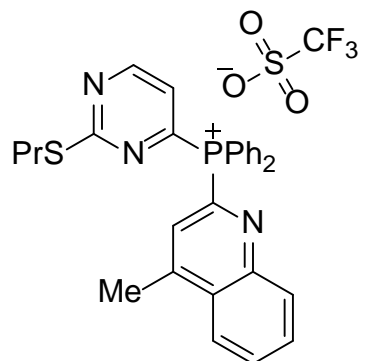

3j

S298

0.97

2.00

2.98

5.00

4.06

1.02

0.99

2.03

2.00

2.96

9.5 9.0 8.5 8.0 7.5 7.0 6.5 6.0 5.5 5.0 4.5 4.0 3.5 3.0 2.5 2.0 1.5 1.0 0.5 0

Chemical Shift (ppm)

175.08  
174.90  
159.98  
159.91  
154.98  
153.87  
148.95  
148.85  
148.65  
148.42  
142.99  
141.82  
136.05  
136.02  
135.08  
134.99  
131.71  
130.68  
130.65  
130.61  
130.52  
129.18  
129.15  
126.20  
125.94  
124.53  
123.27  
123.08  
122.37  
115.70  
114.83

77.32  
77.00  
76.68

33.08

22.06  
19.19

13.26

CDCl<sub>3</sub>, 100 MHz

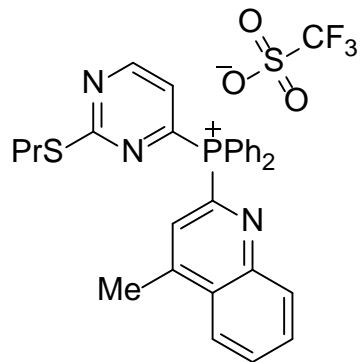

3j

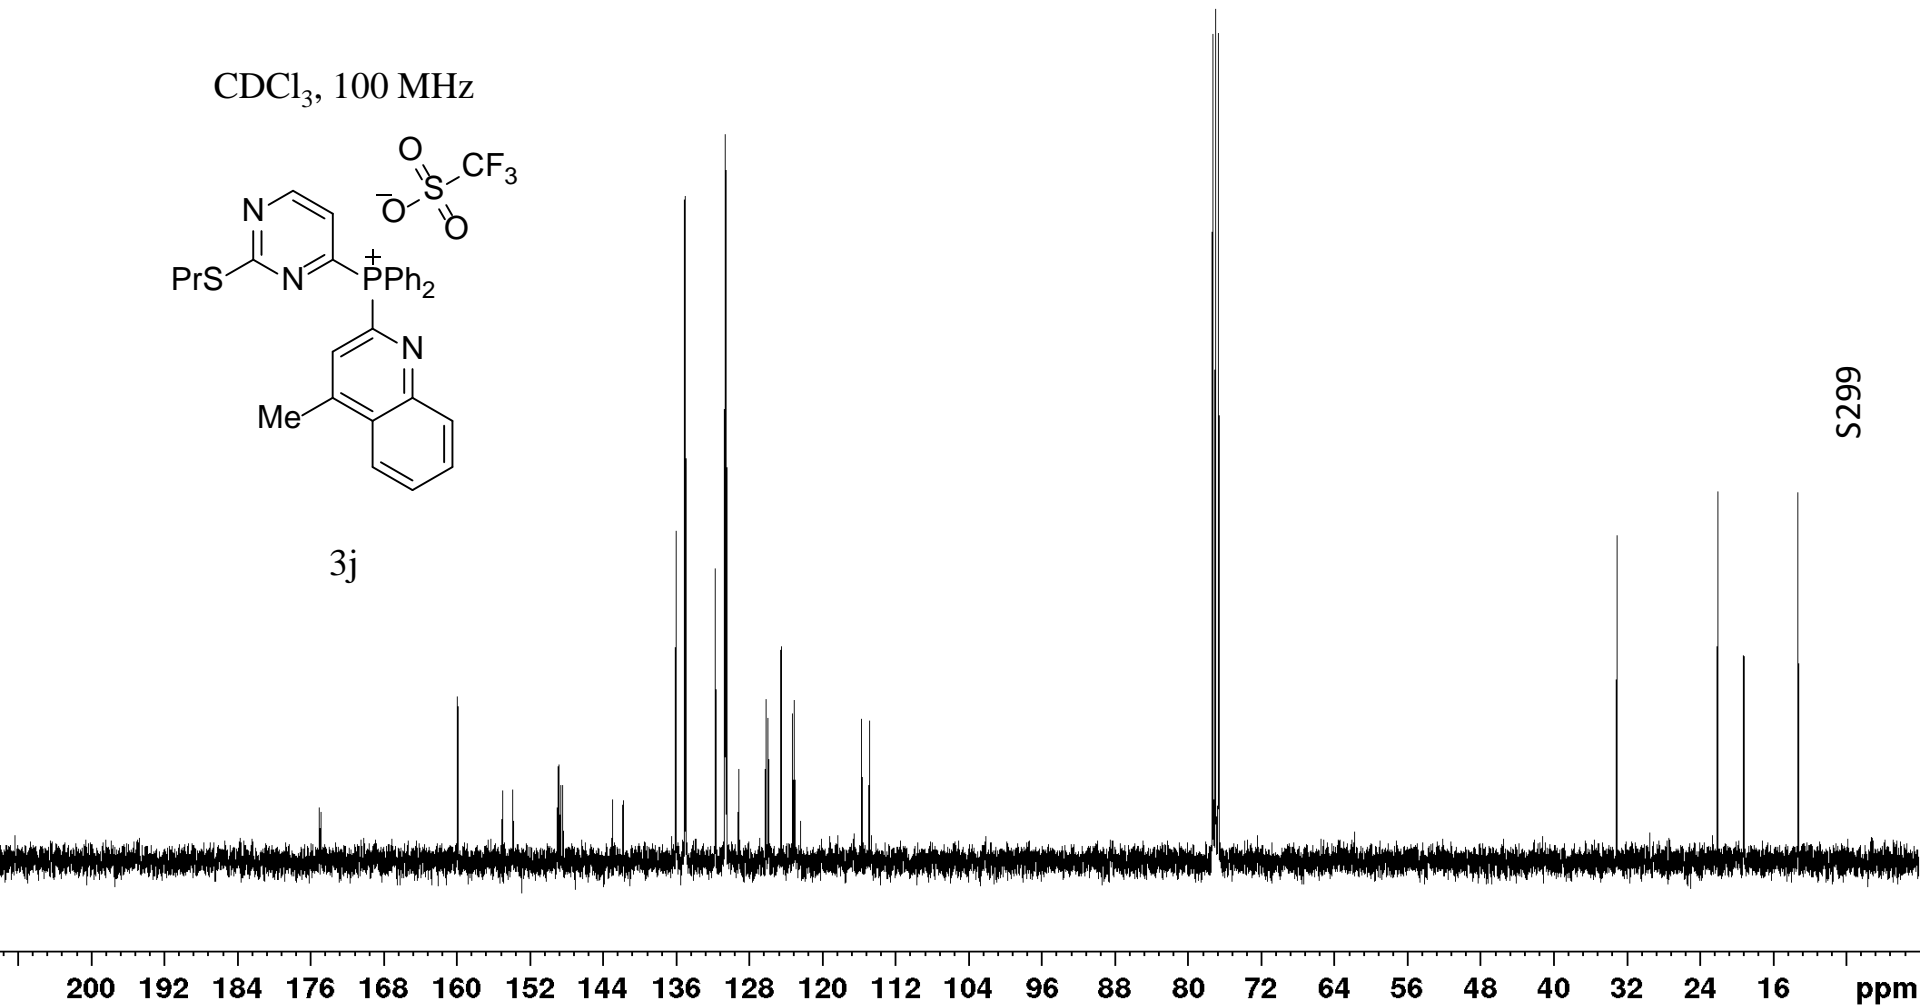

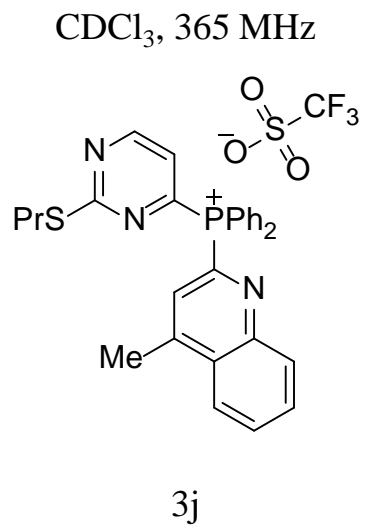

— -78.21

S300

0 -10 -20 -30 -40 -50 -60 -70 -80 -90 -100 -110 -120 -130 -140 -150 -160 -170 -180 ppm

CDCl<sub>3</sub>, 162 MHz

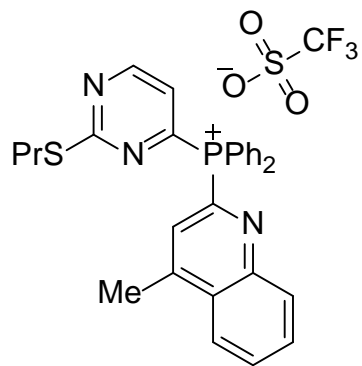

3j

— 9.49

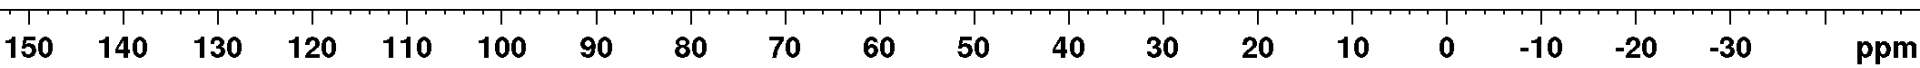

S301

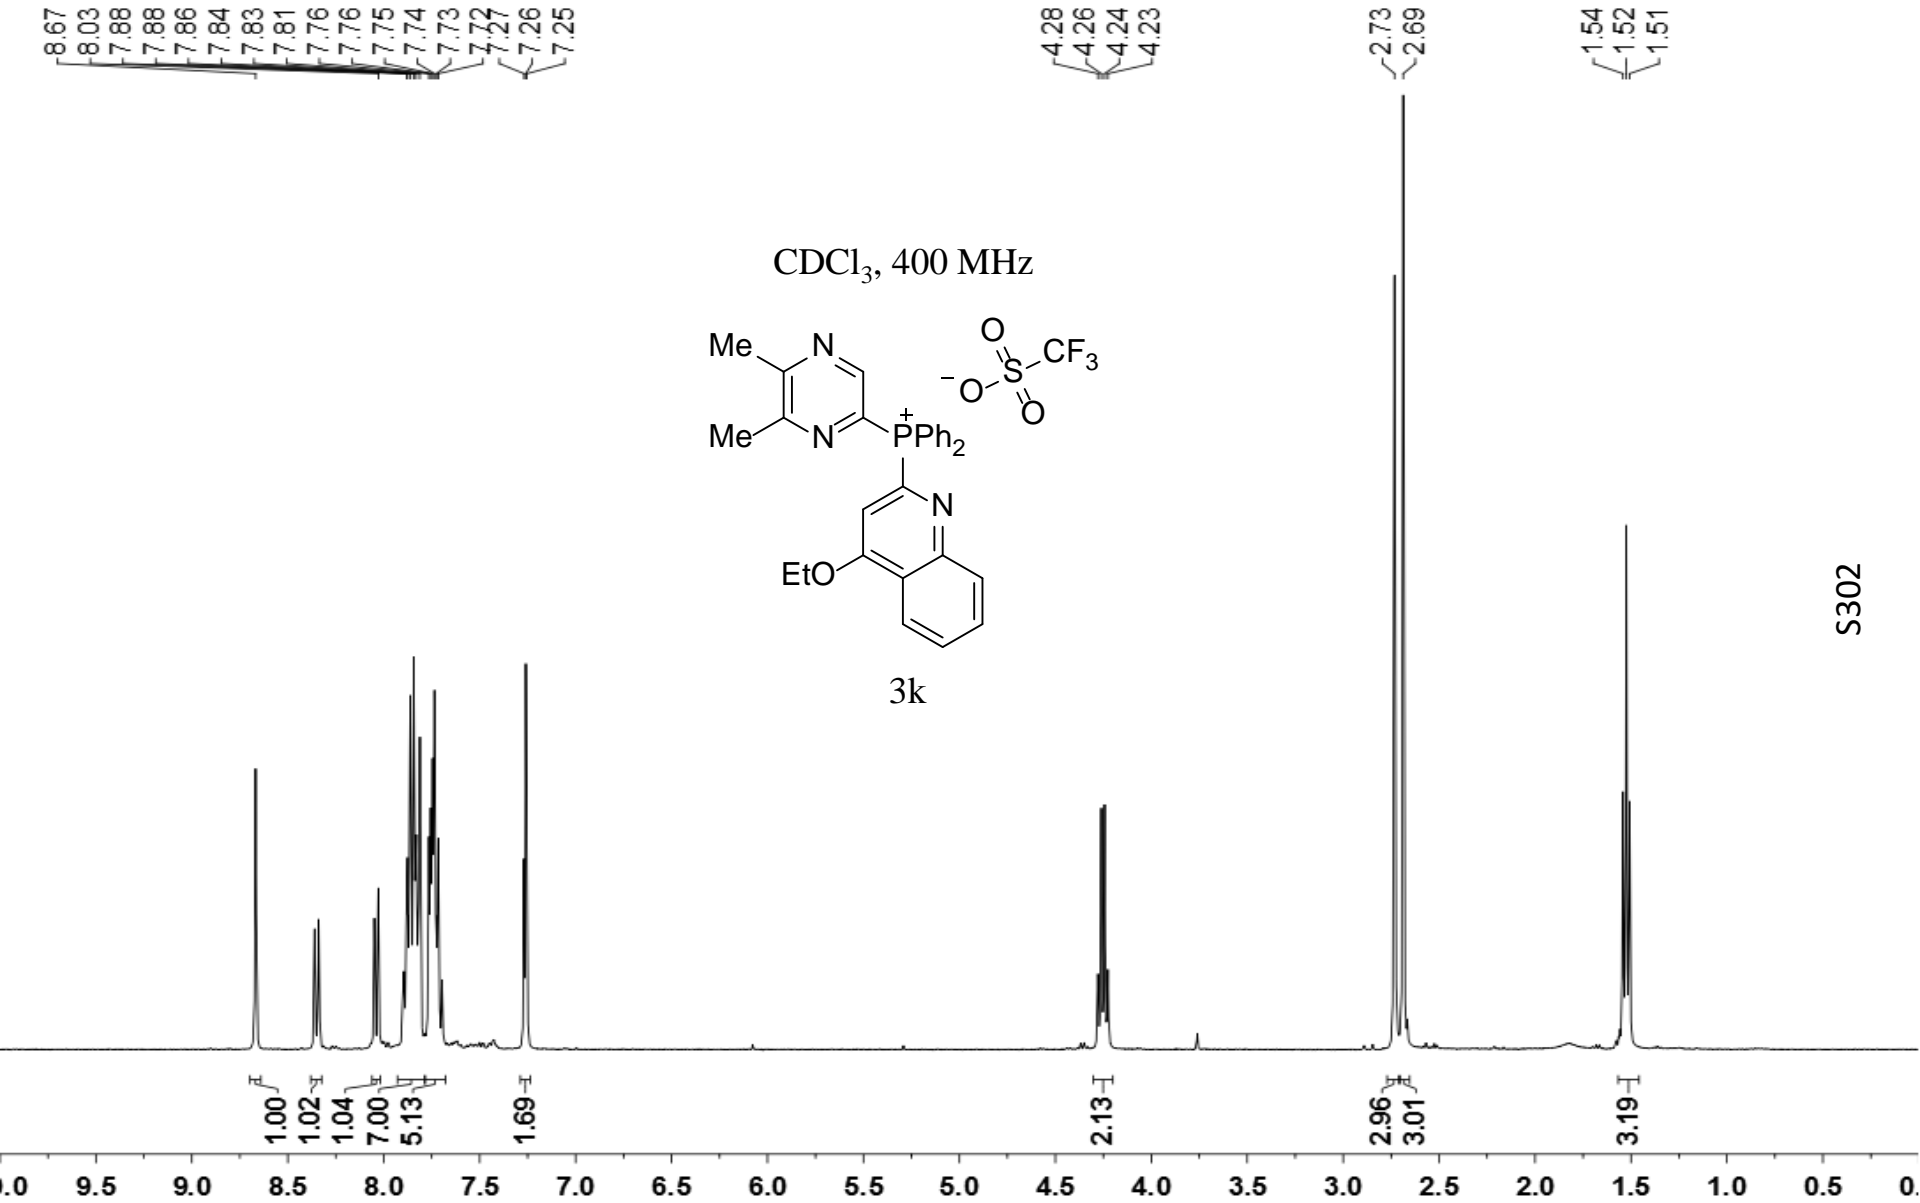

S302

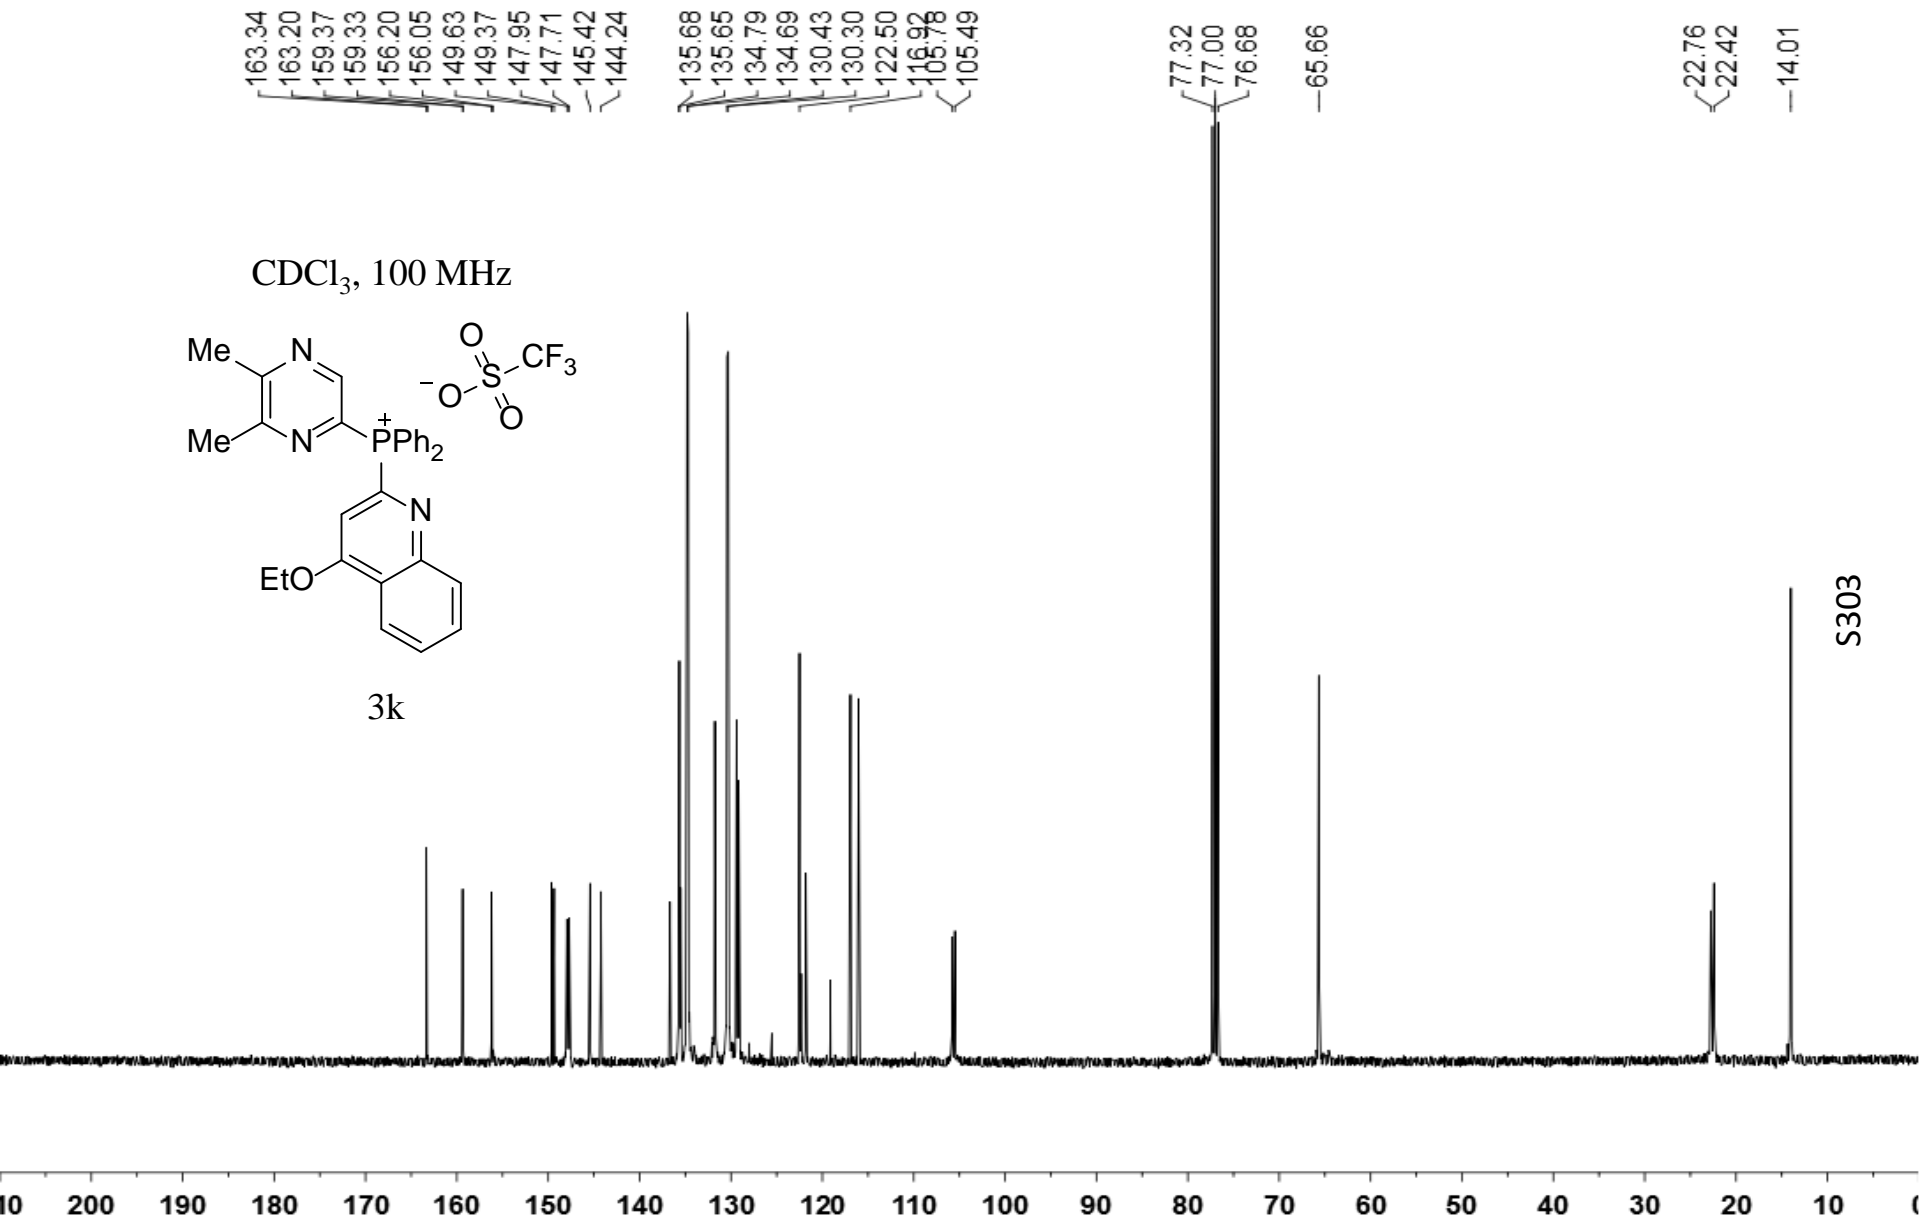

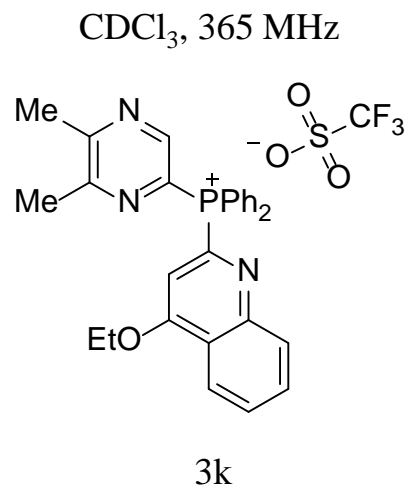

78.26

0 10 0 -10 -20 -30 -40 -50 -60 -70 -80 -90 -110 -130 -150 -170 -190

S304



CDCl<sub>3</sub>, 162 MHz

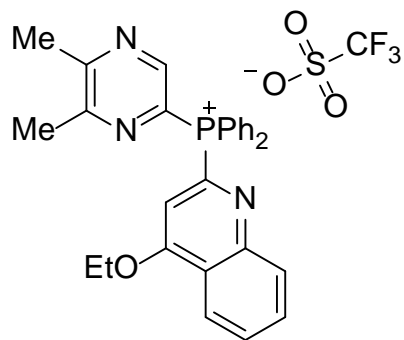

3k

7.50

S305





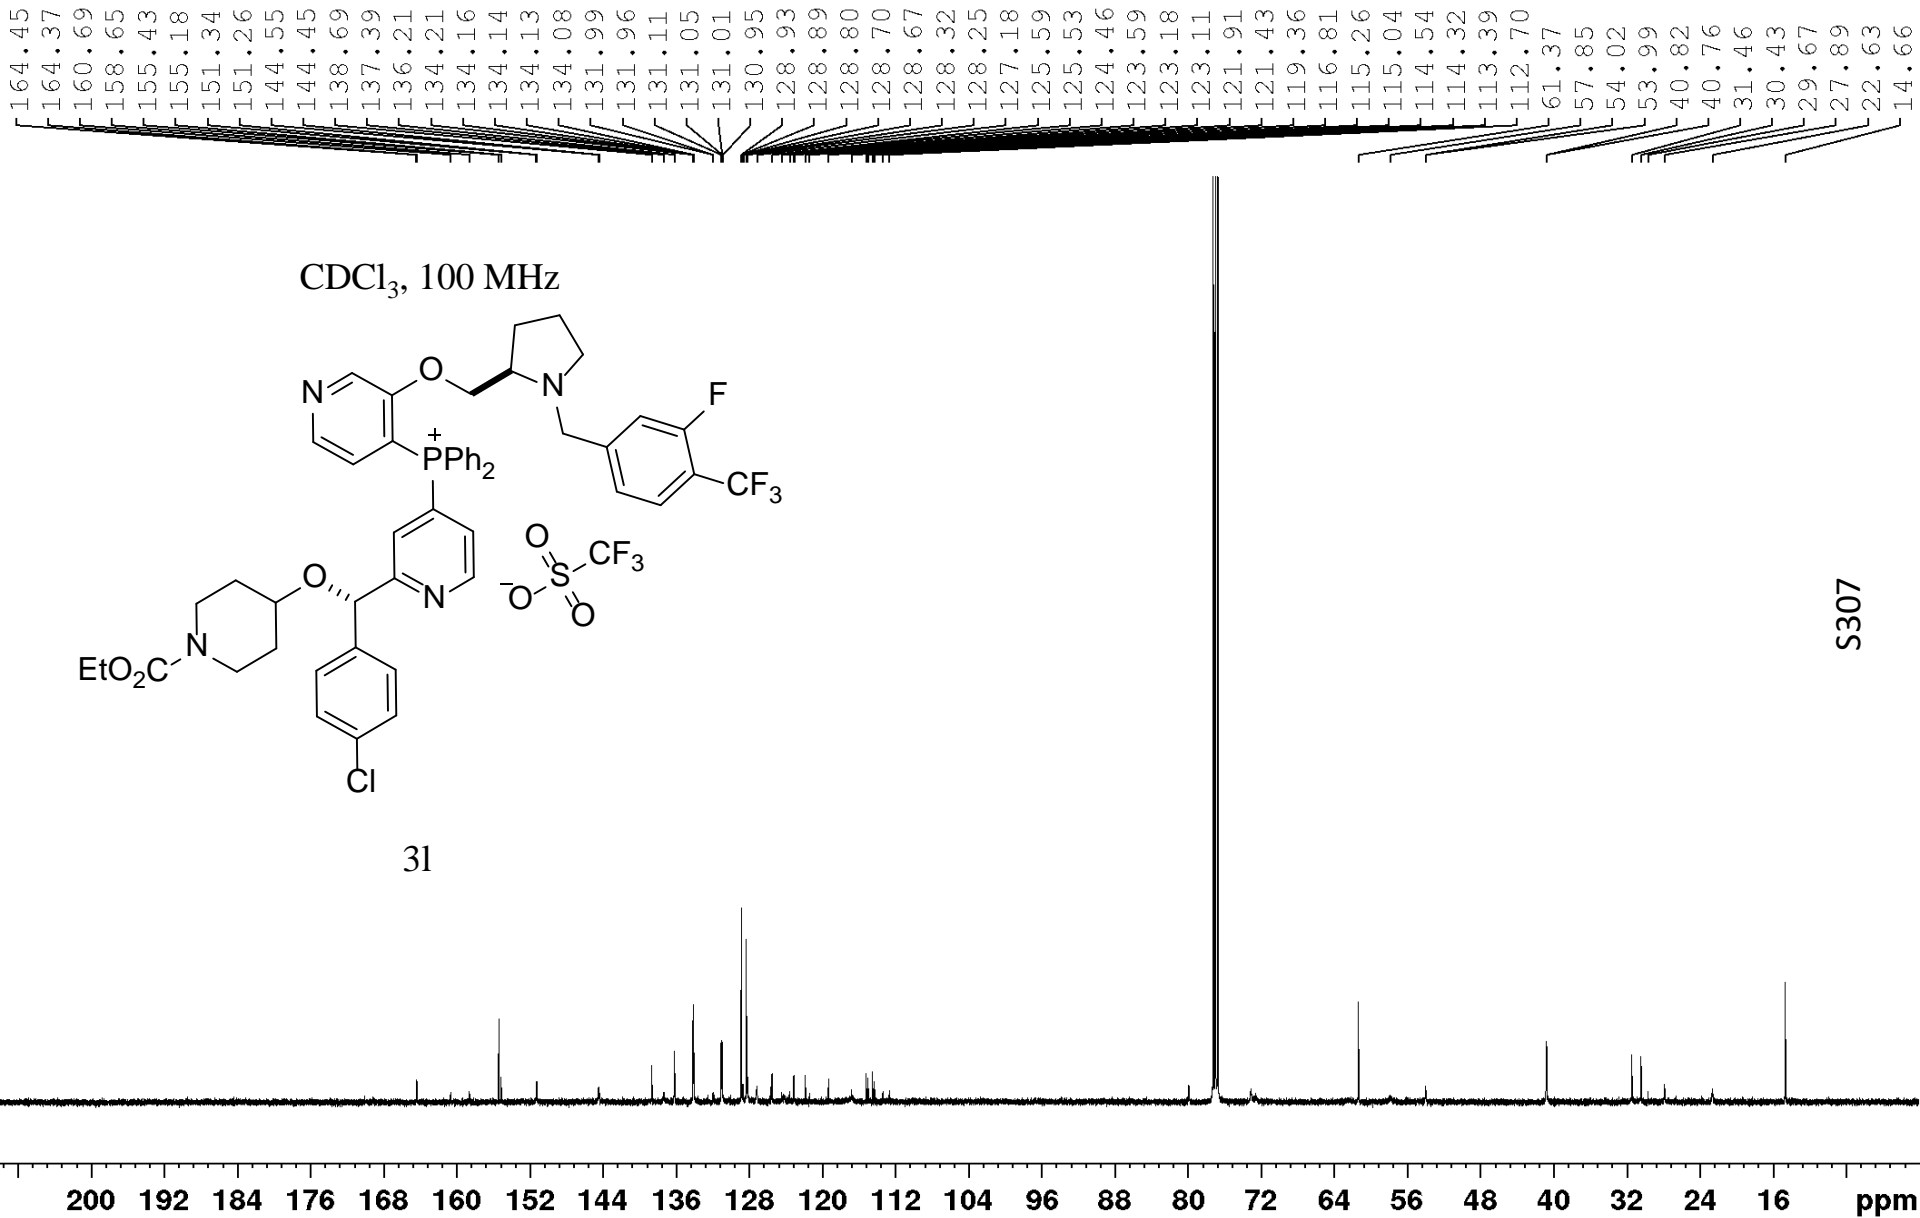

164.45  
164.37  
160.69  
158.65  
155.43  
155.18  
151.34  
151.26  
144.55  
144.45  
138.69  
137.39  
136.21  
134.21  
134.16  
134.14  
134.13  
134.08  
131.99  
131.96  
131.11  
131.05  
131.01  
130.95  
128.93  
128.89  
128.80  
128.70  
128.67  
128.32  
128.25  
127.18  
125.59  
125.53  
124.46  
123.59  
123.18  
123.11  
121.91  
121.43  
119.36  
116.81  
115.26  
115.04  
114.54  
114.32  
113.39  
112.70  
61.37  
57.85  
54.02  
53.99  
40.82  
40.76  
31.46  
30.43  
29.67  
27.89  
22.63  
14.66

S307

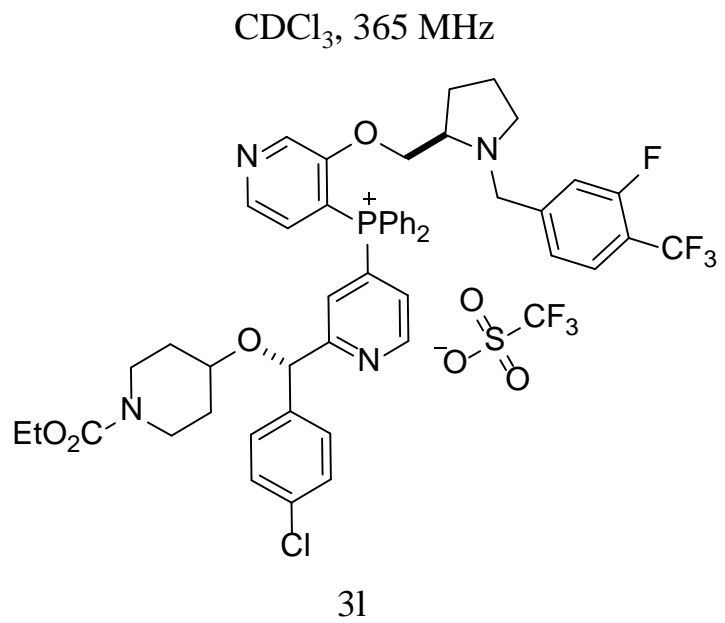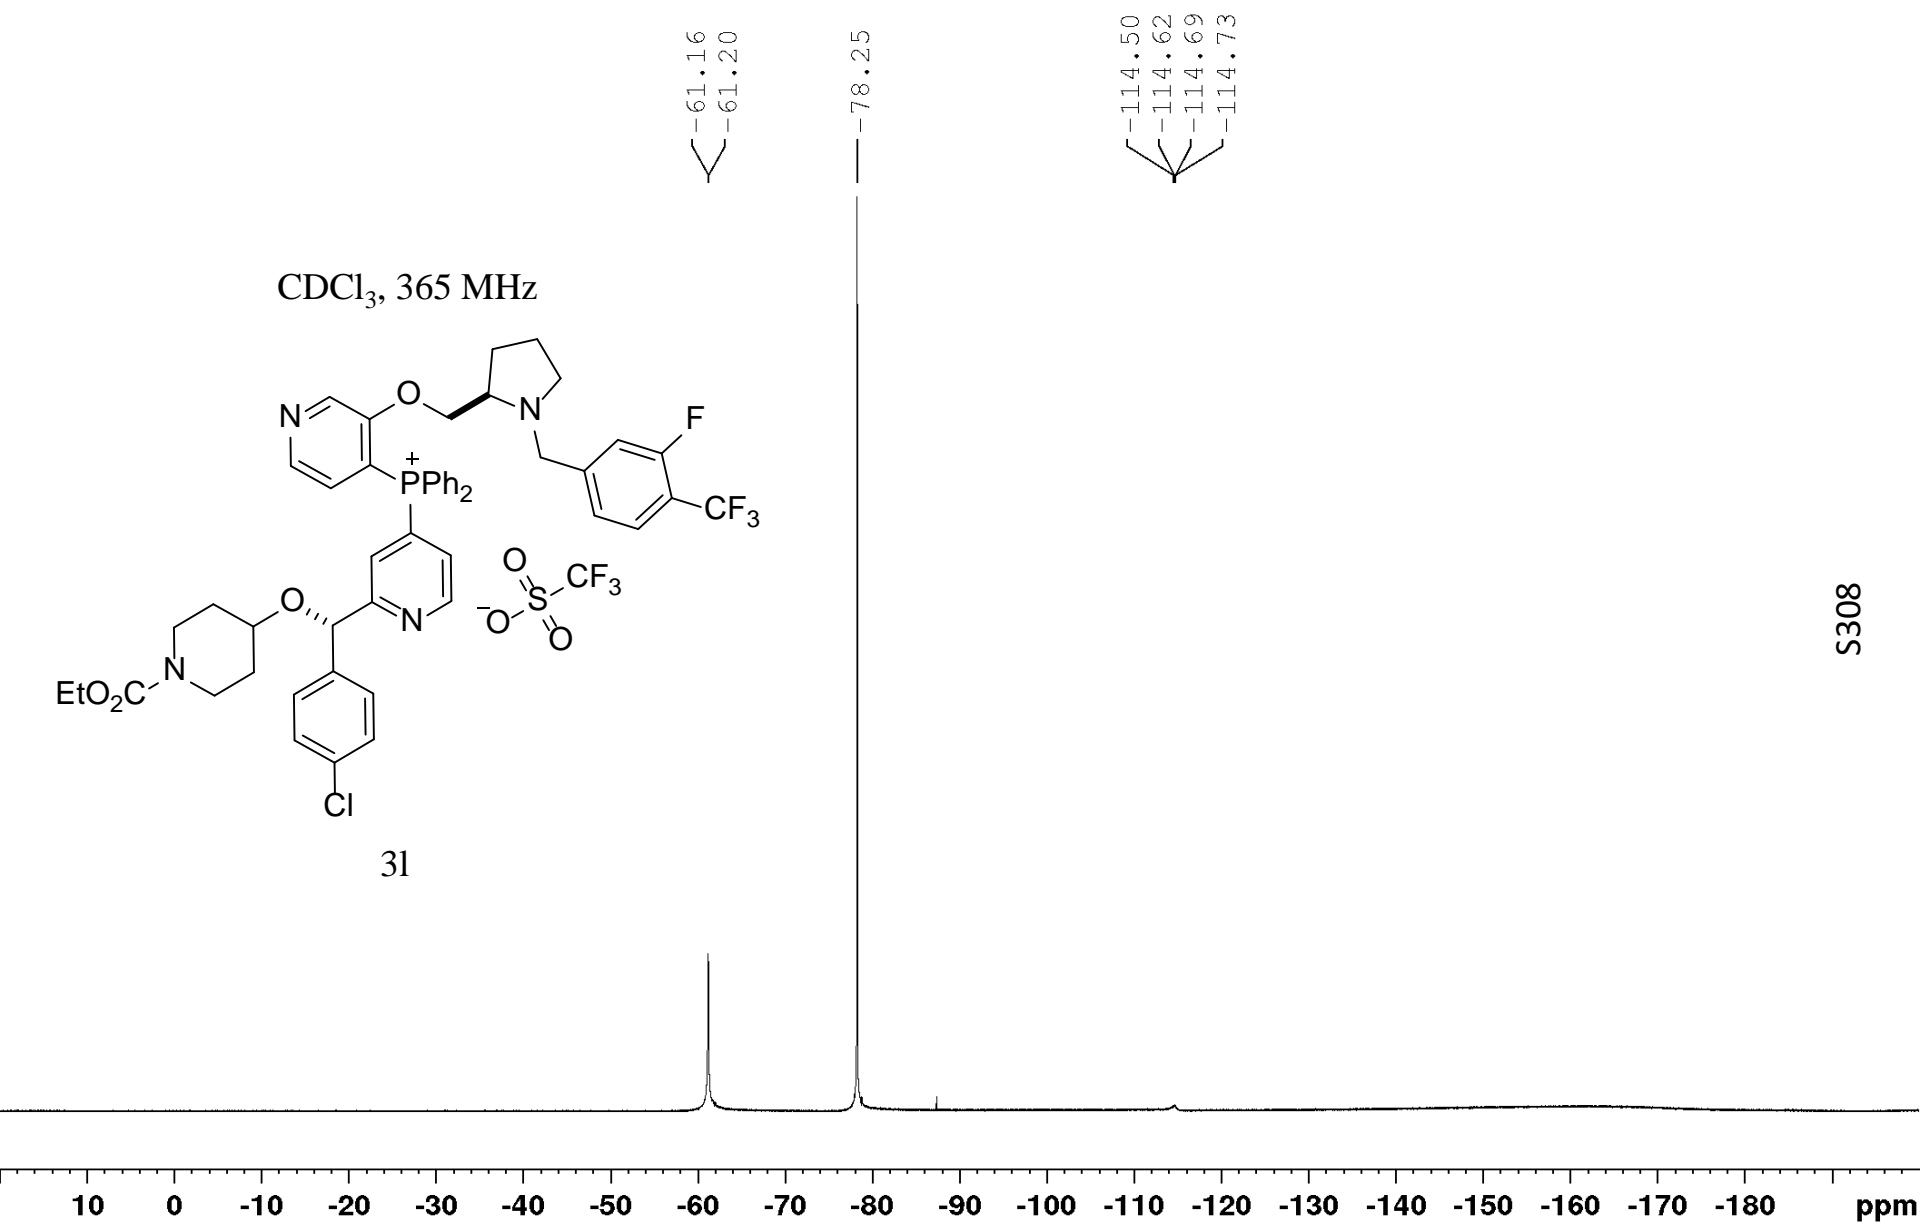

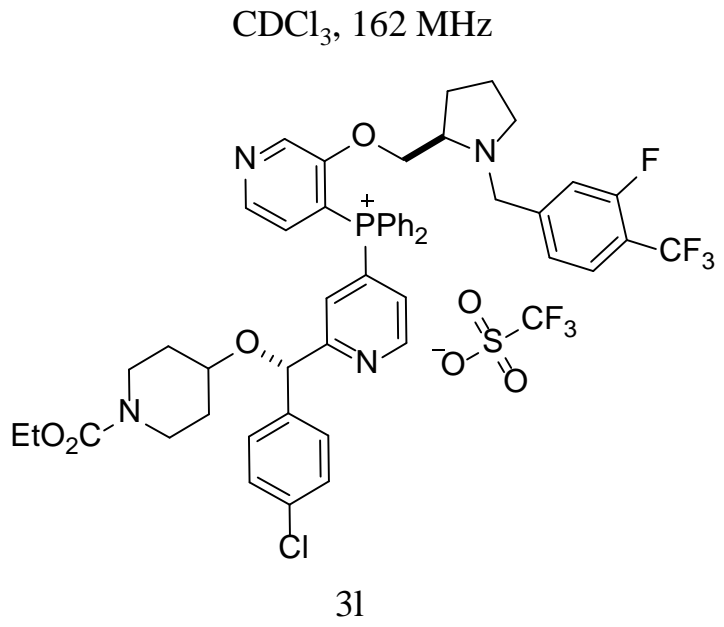

— 21.01

S309

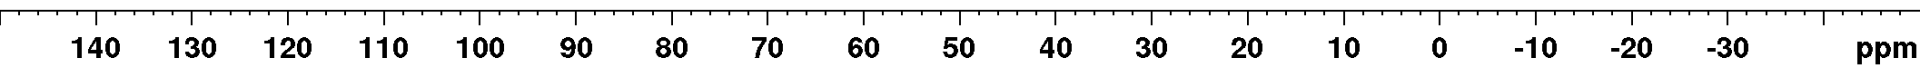

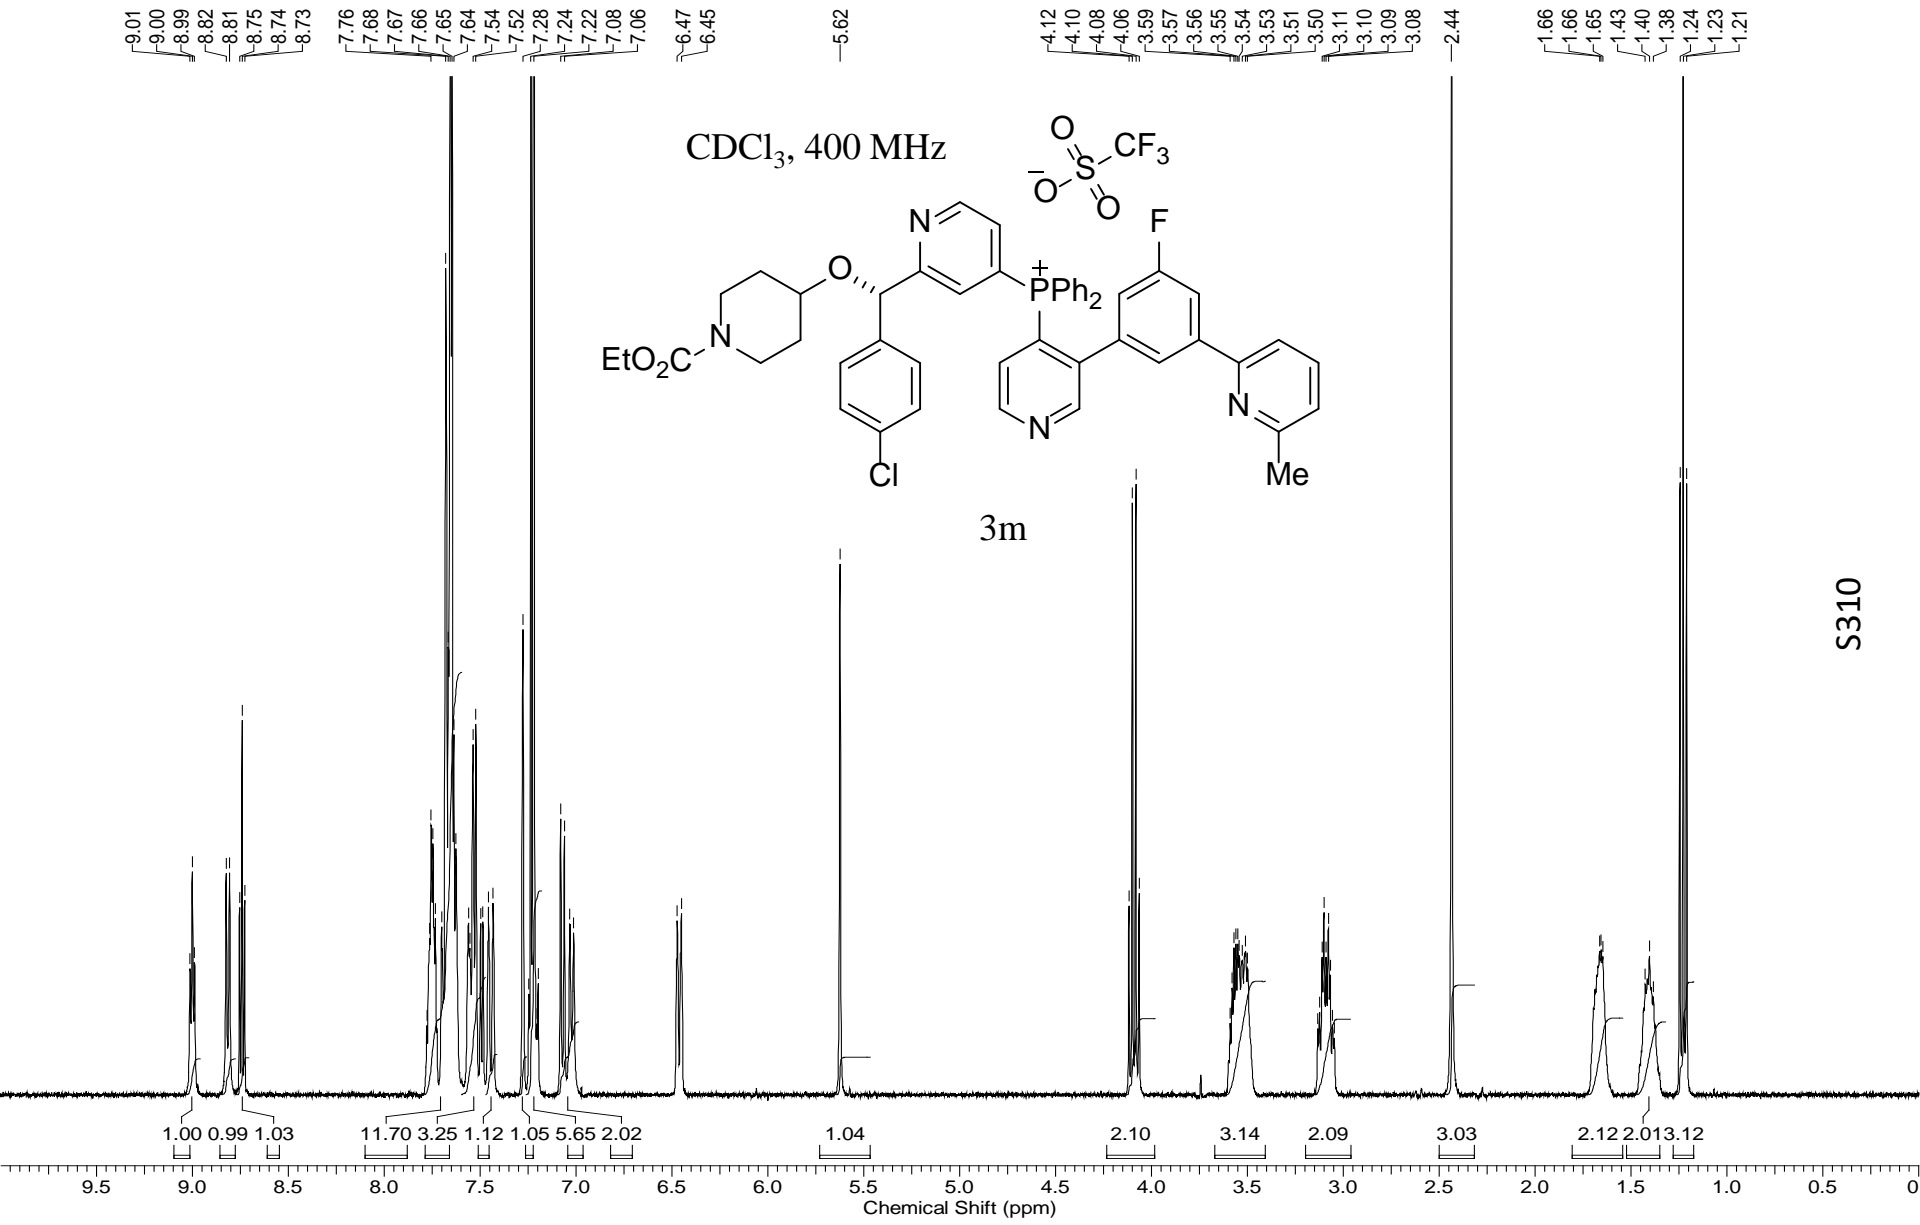

S310

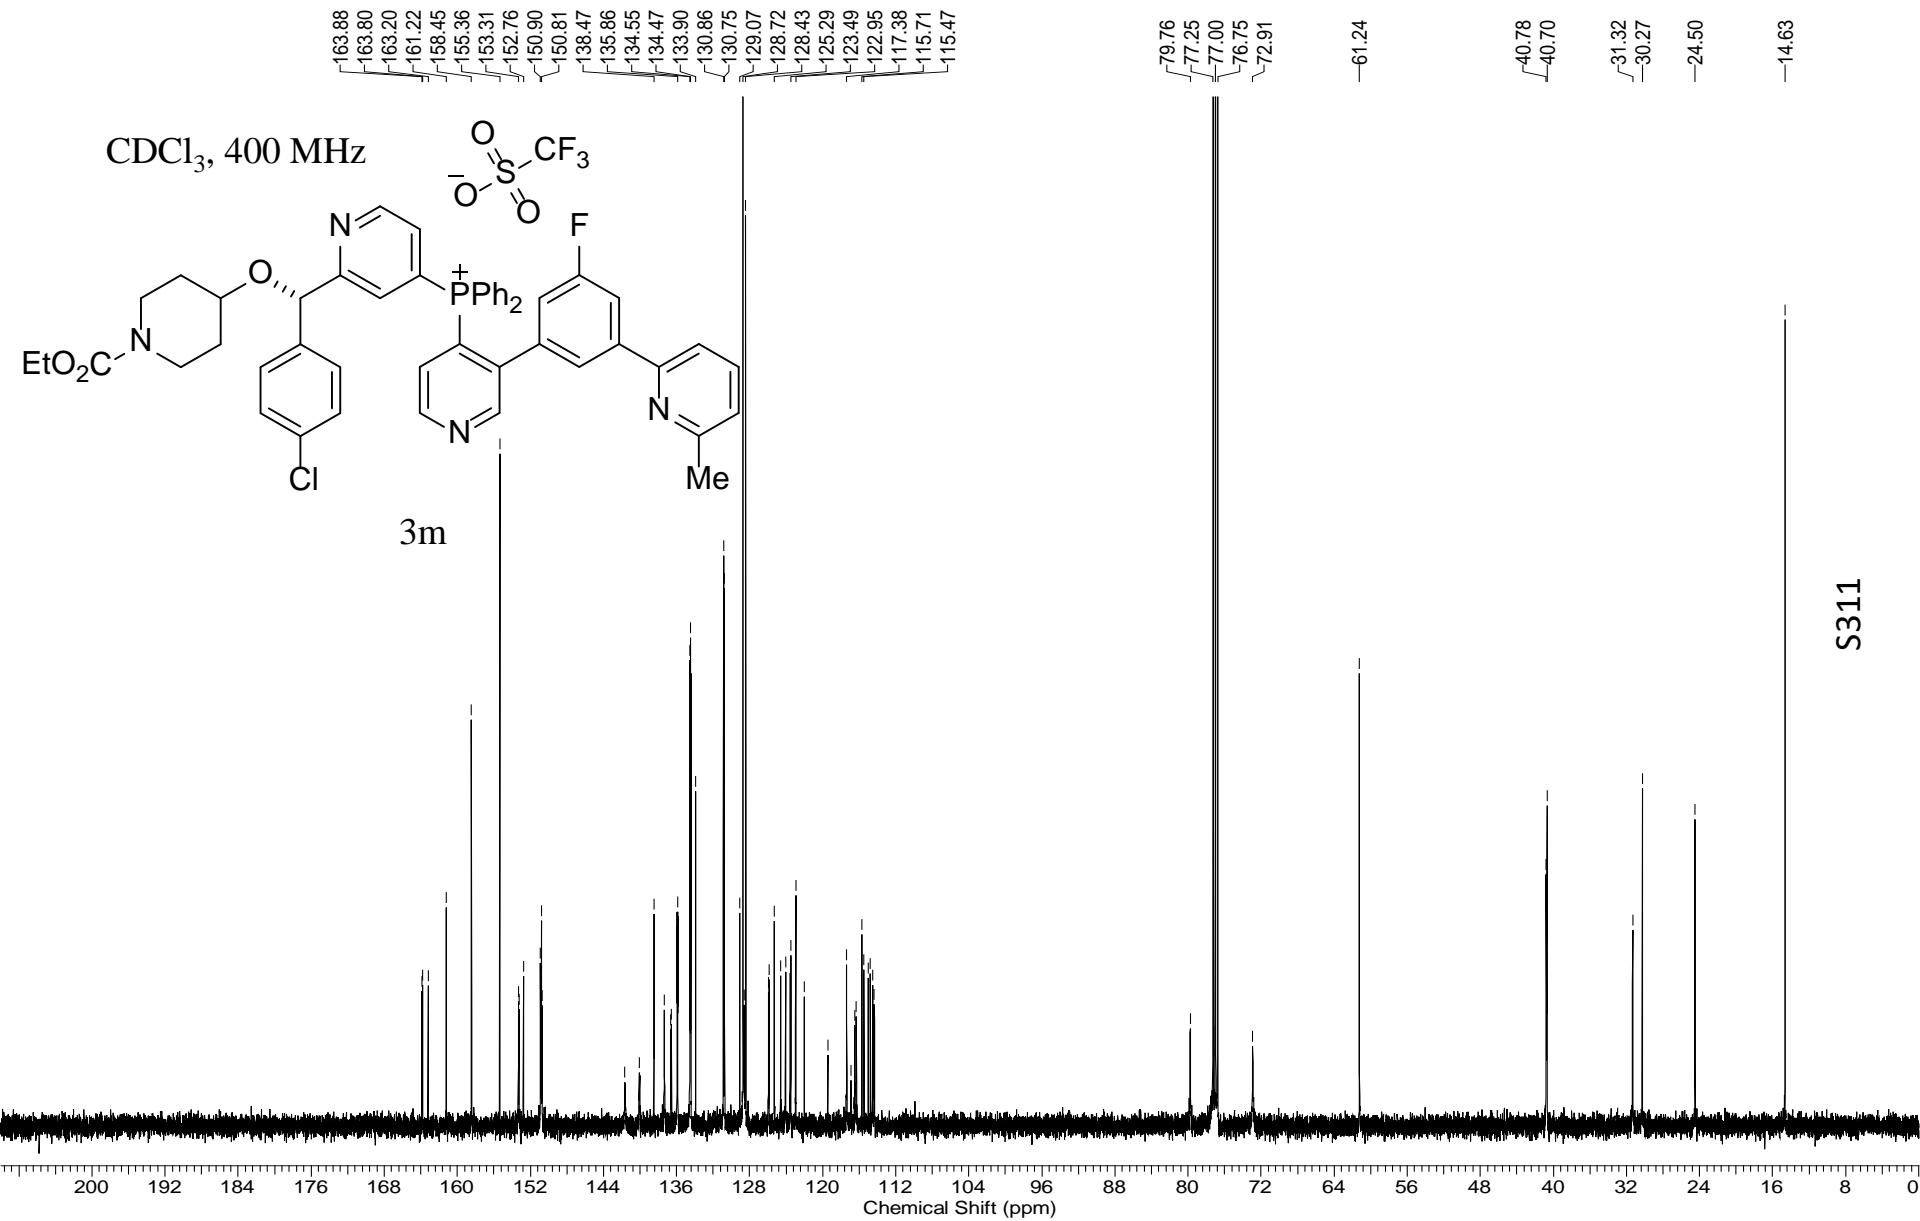

S311

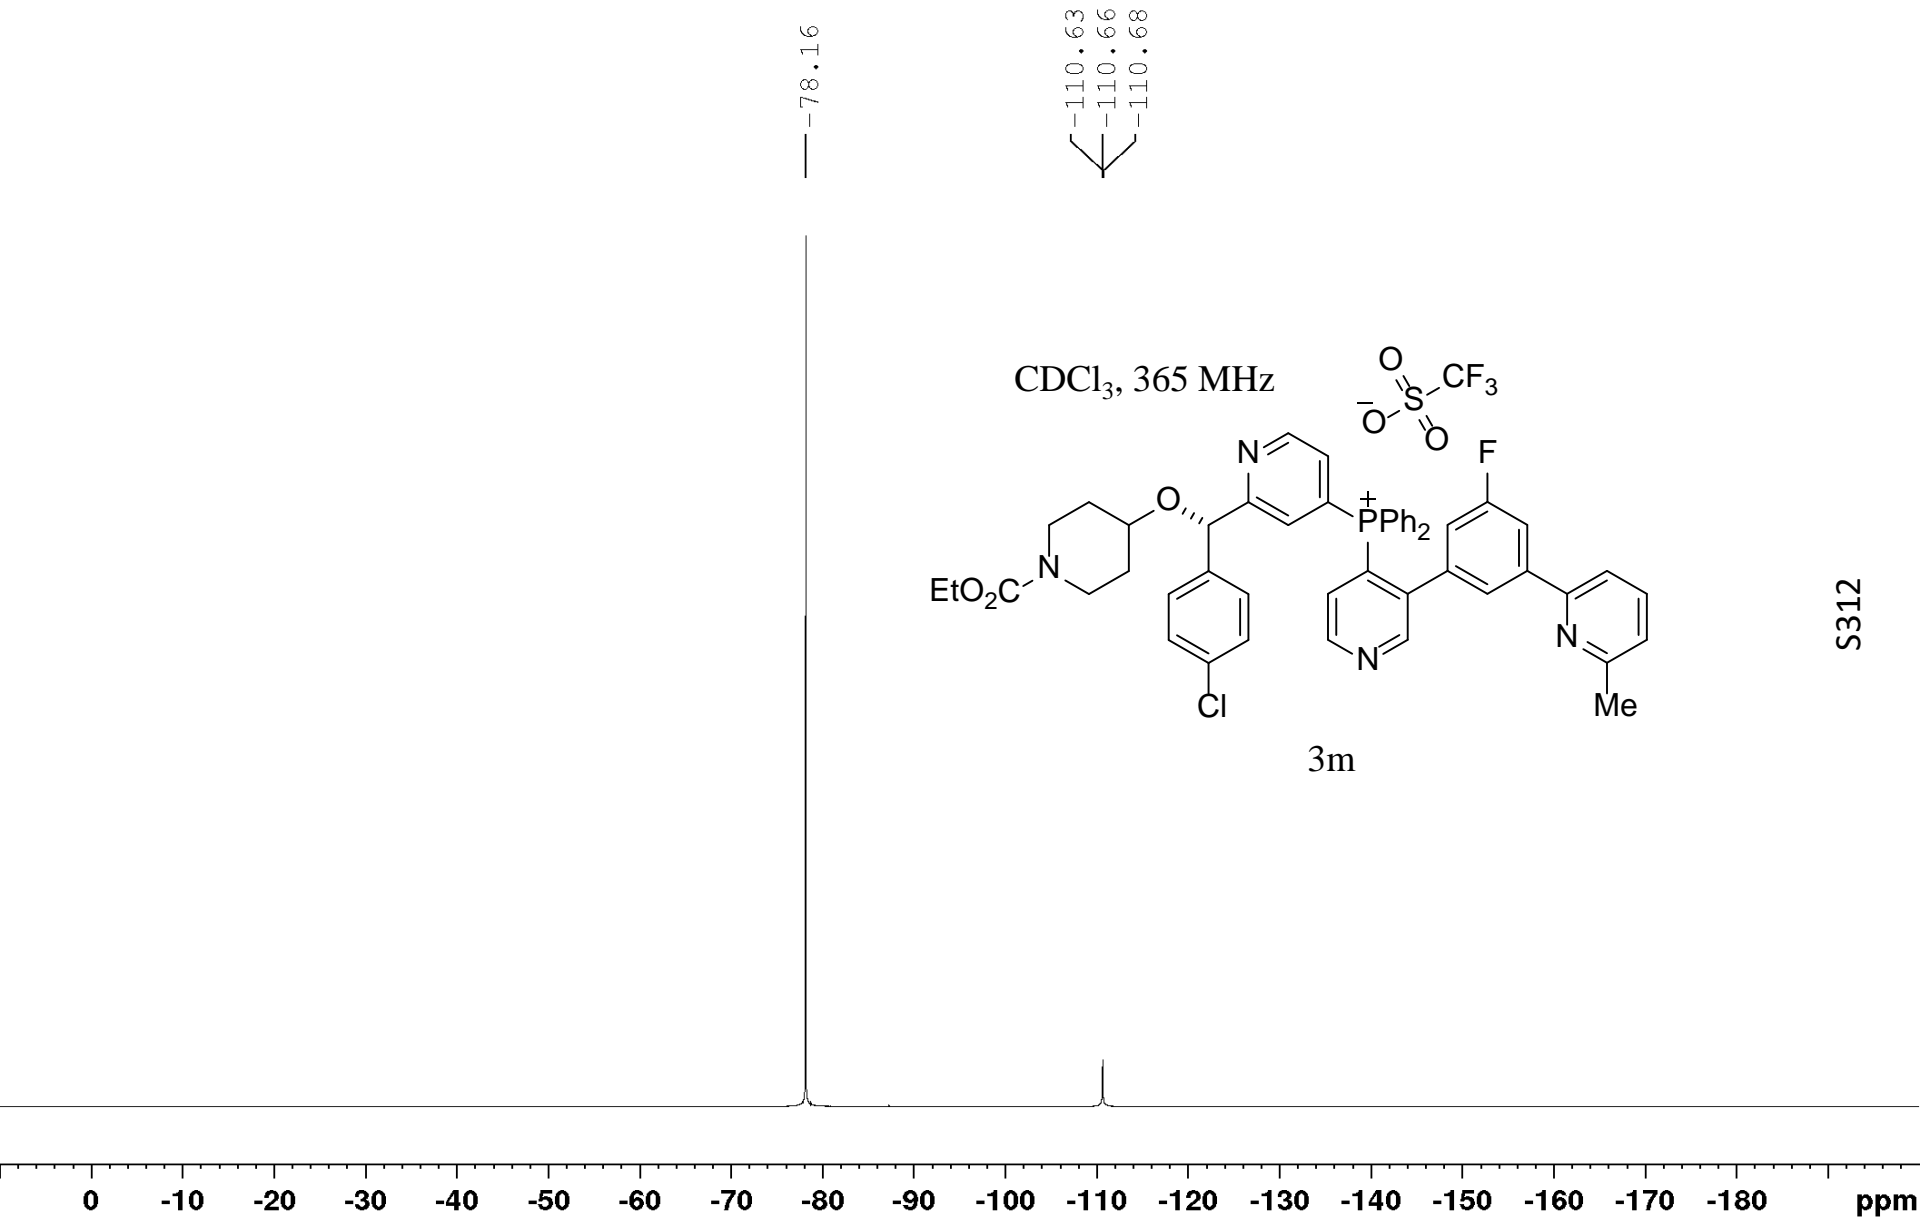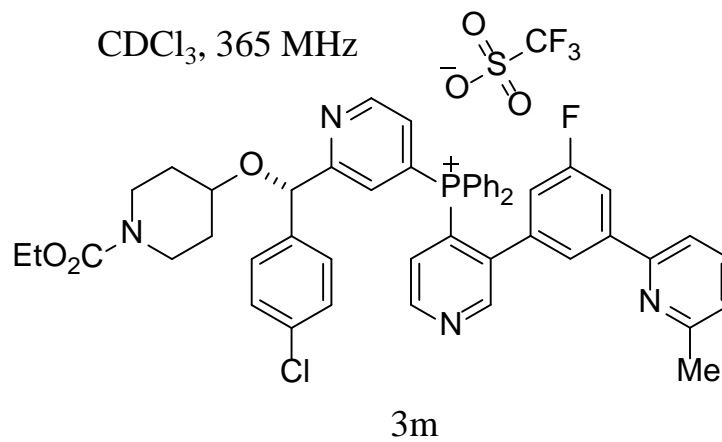

S312



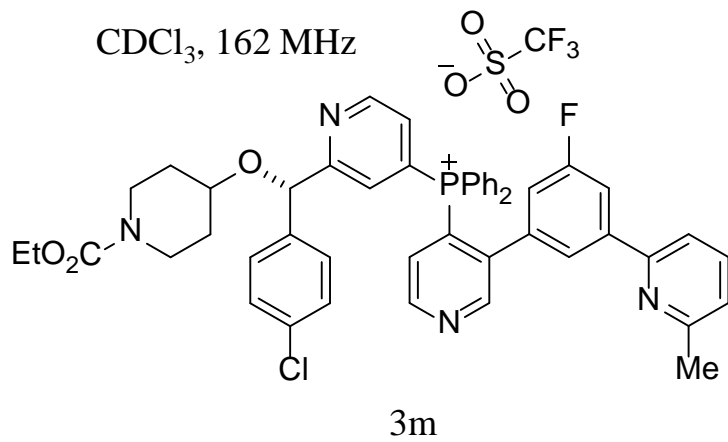

— 20.63

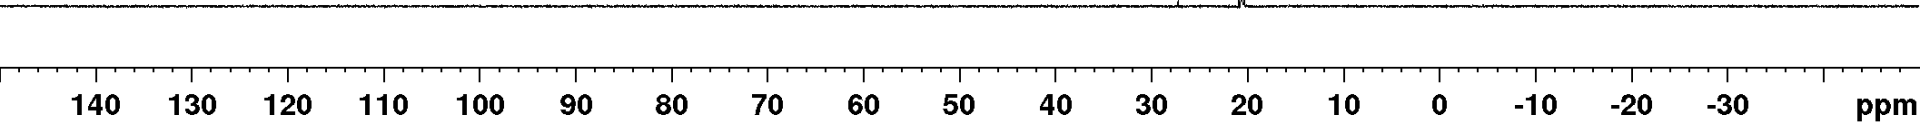

S313

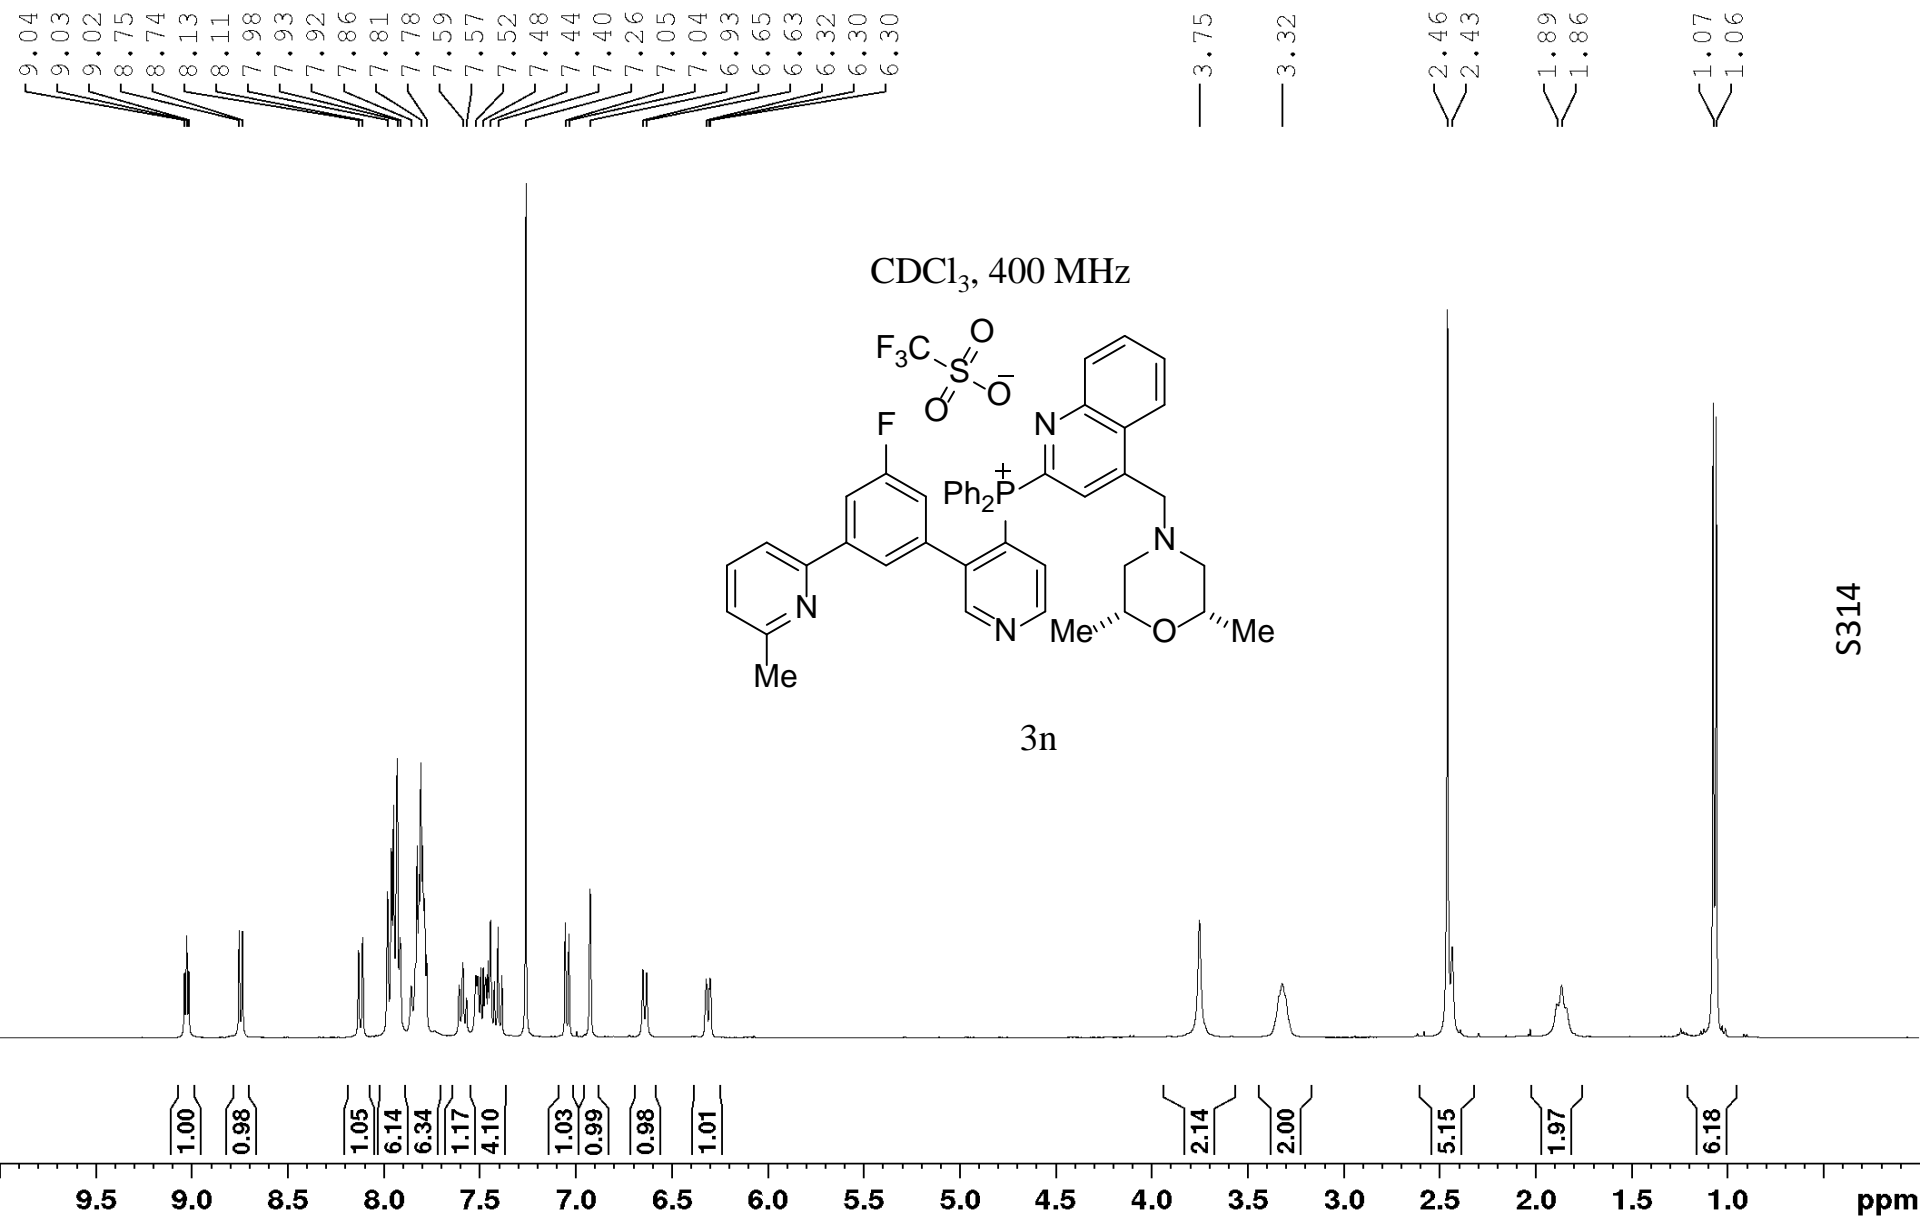

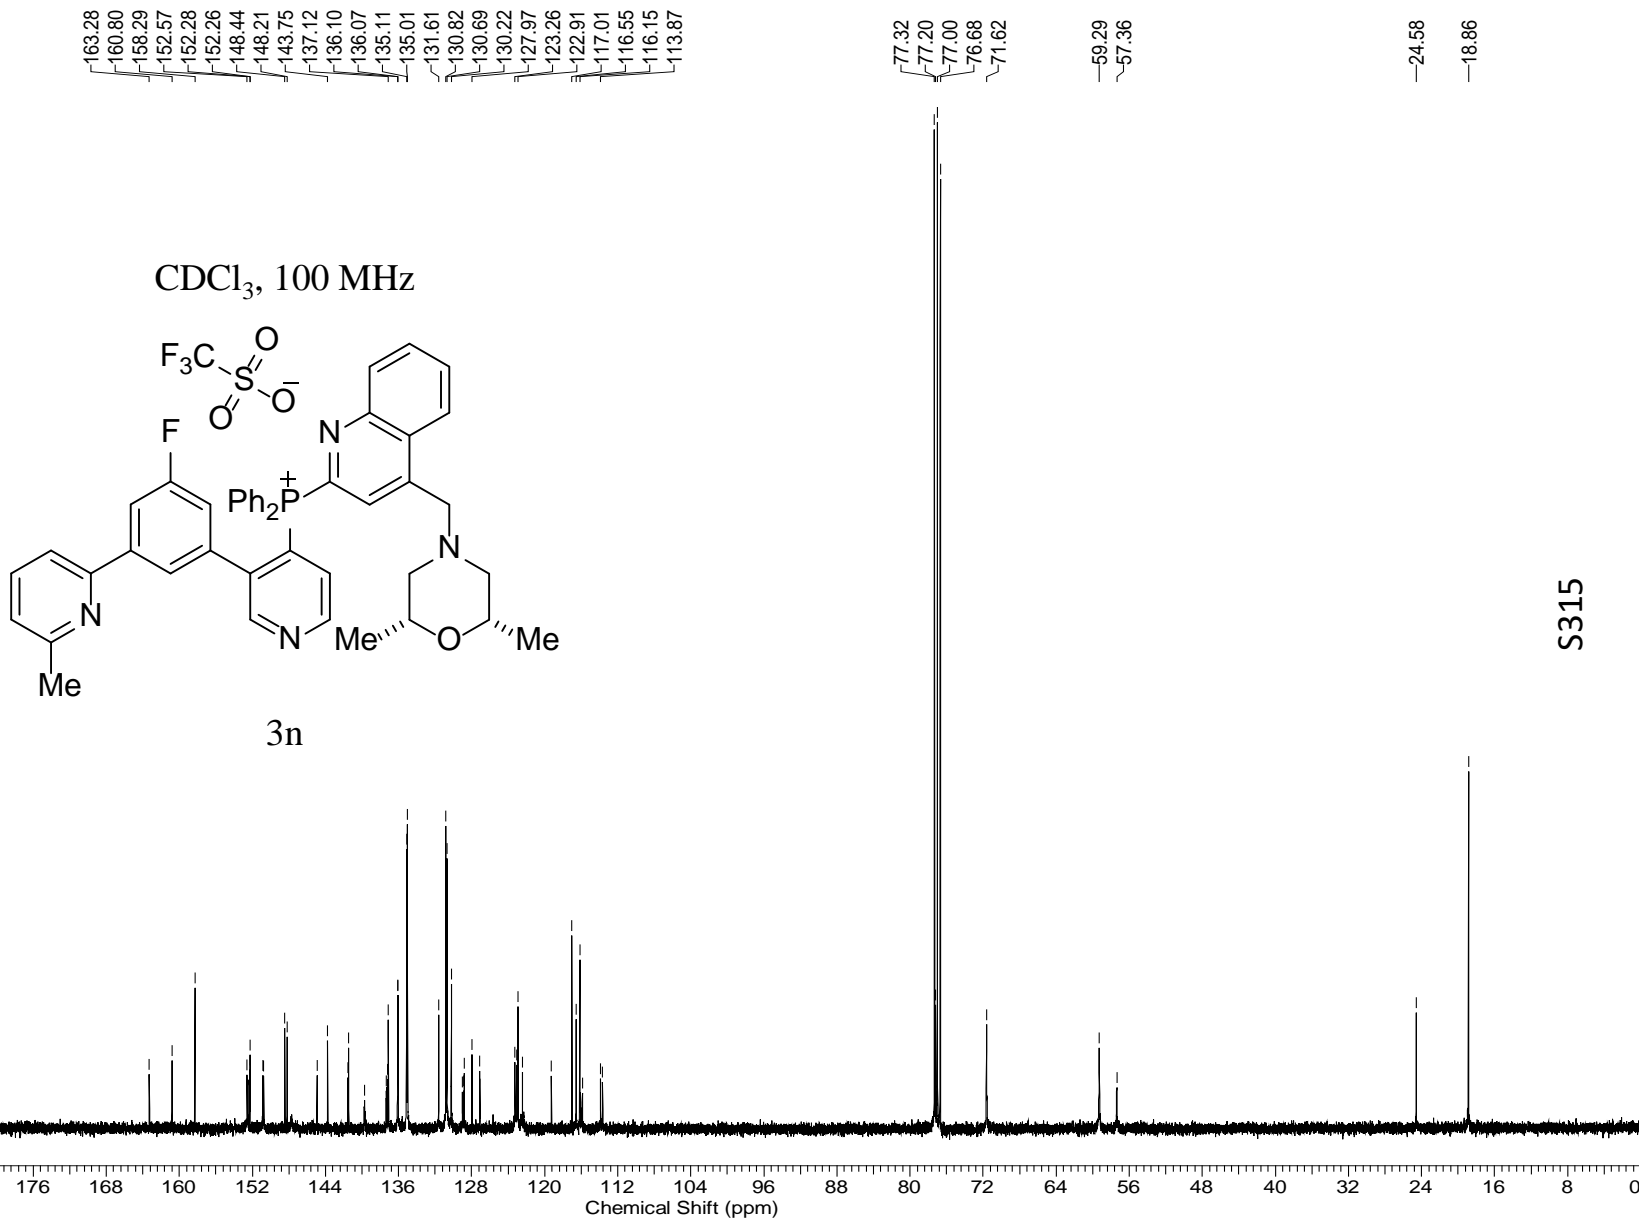

S315

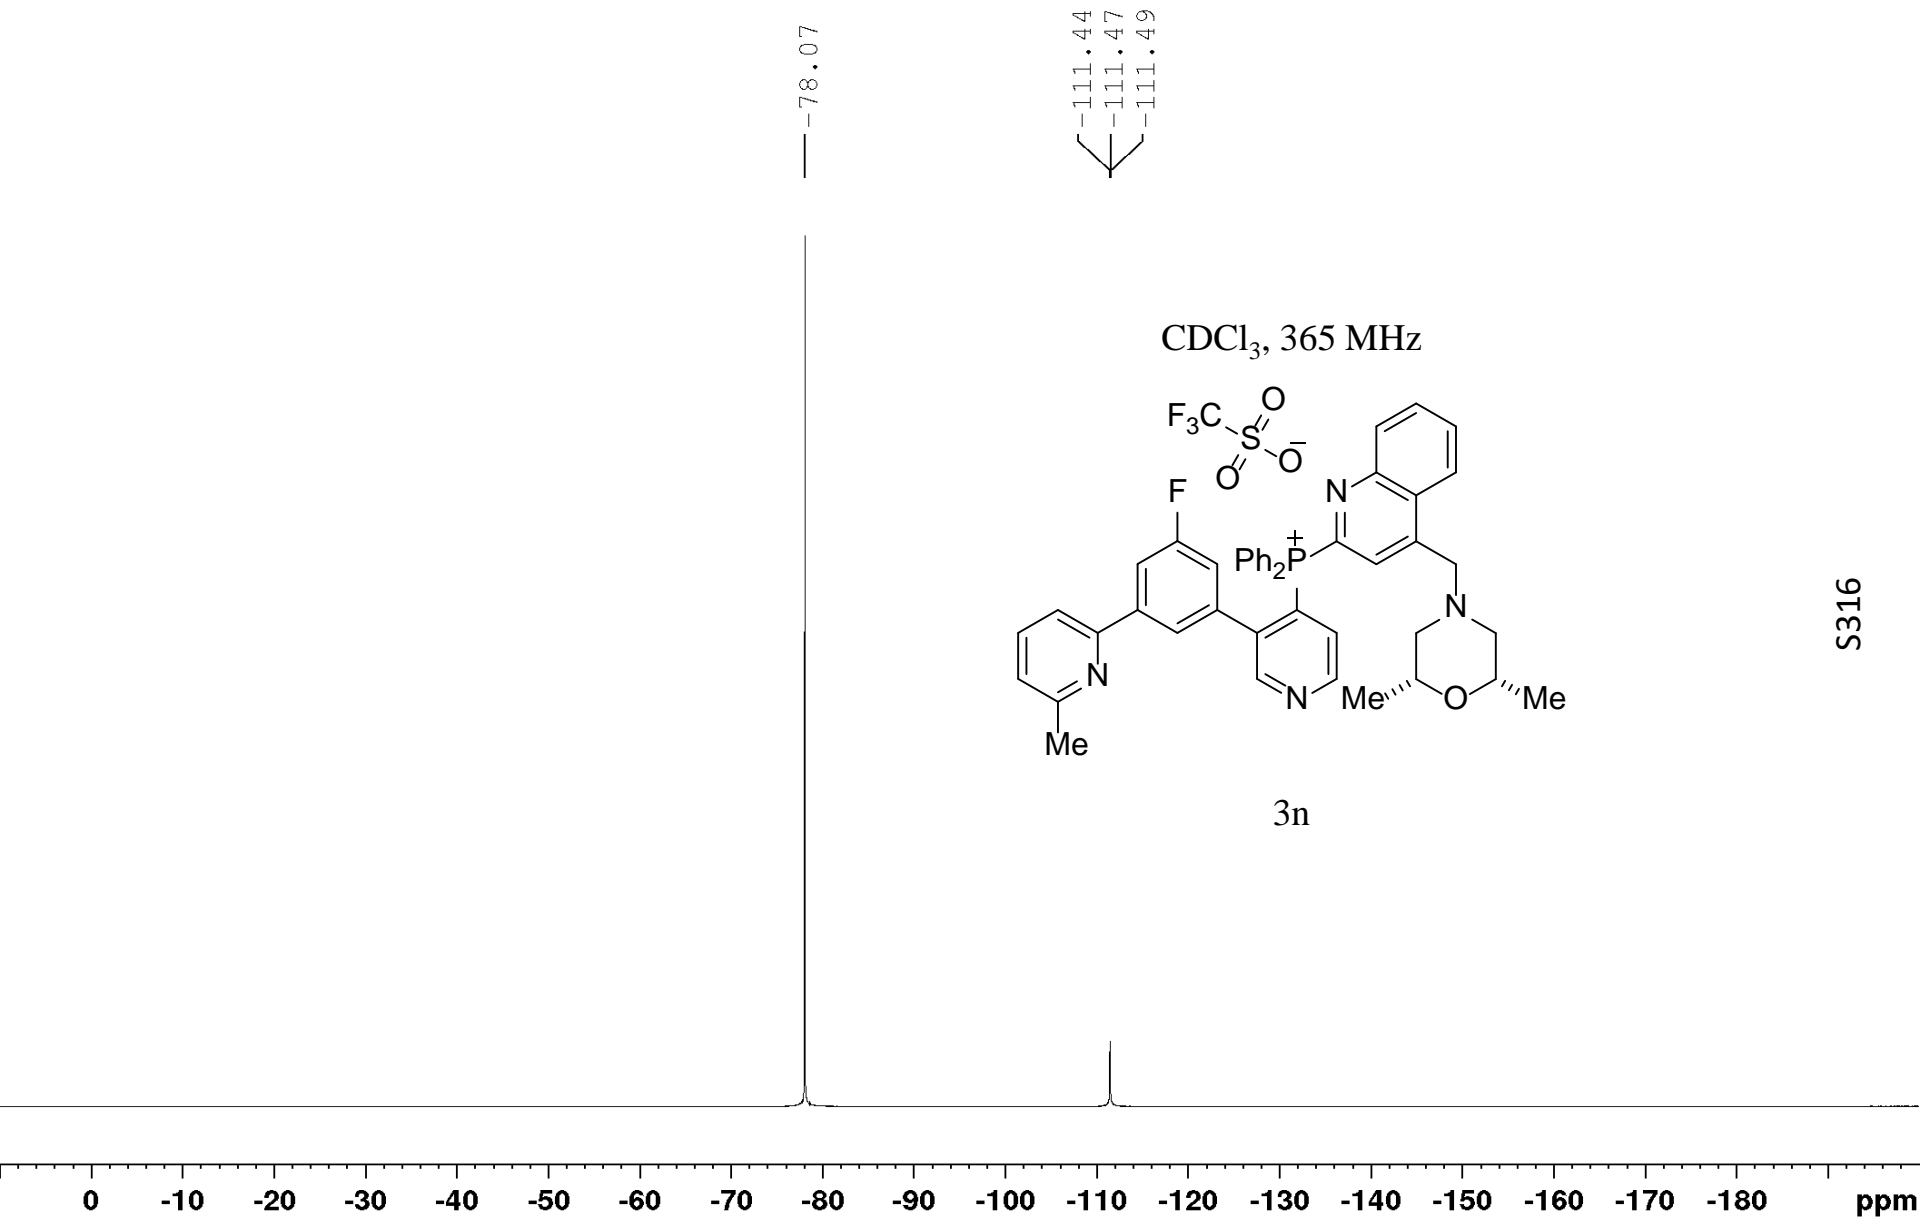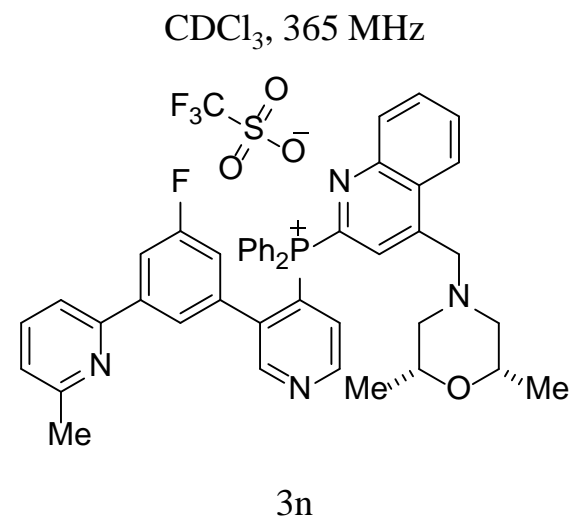

S316

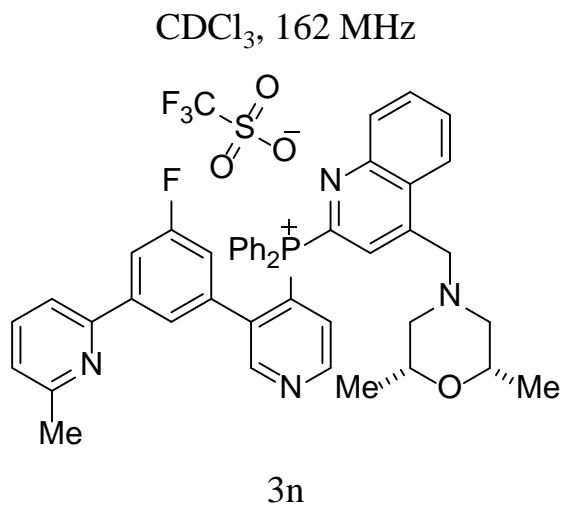

—11.94

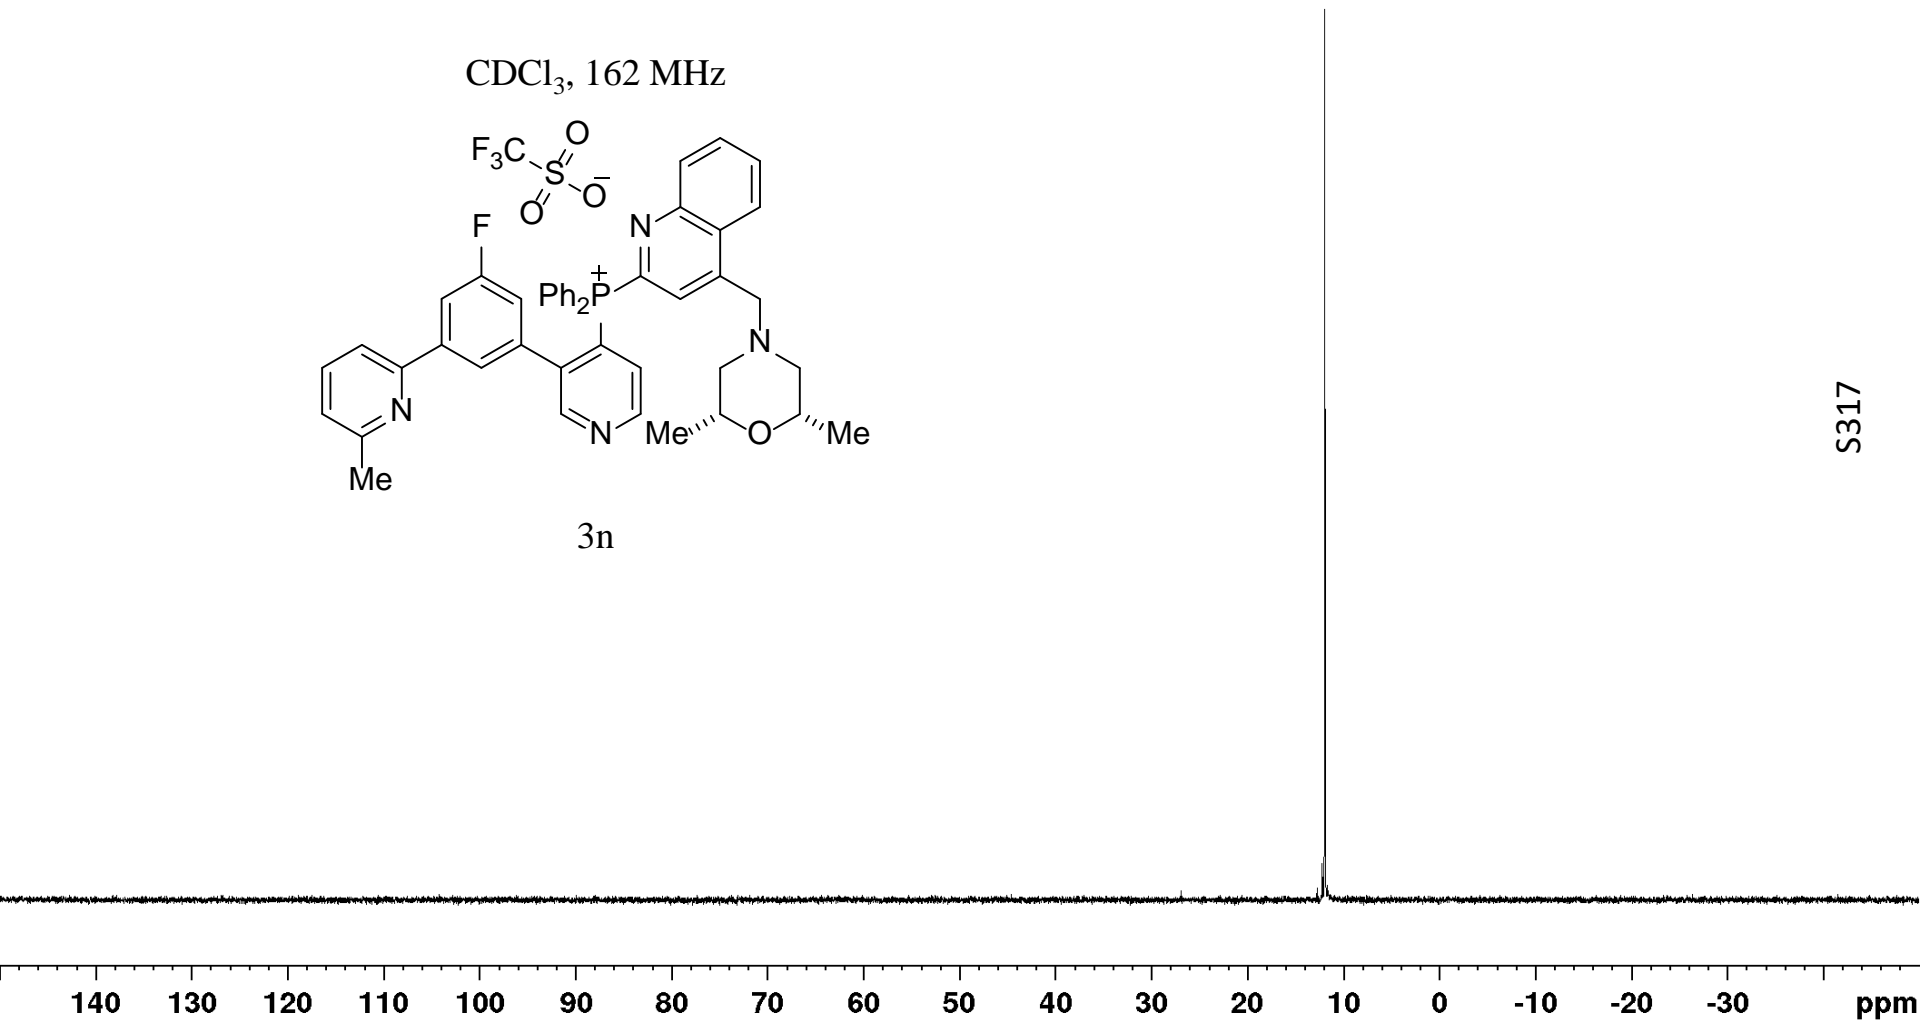

S317

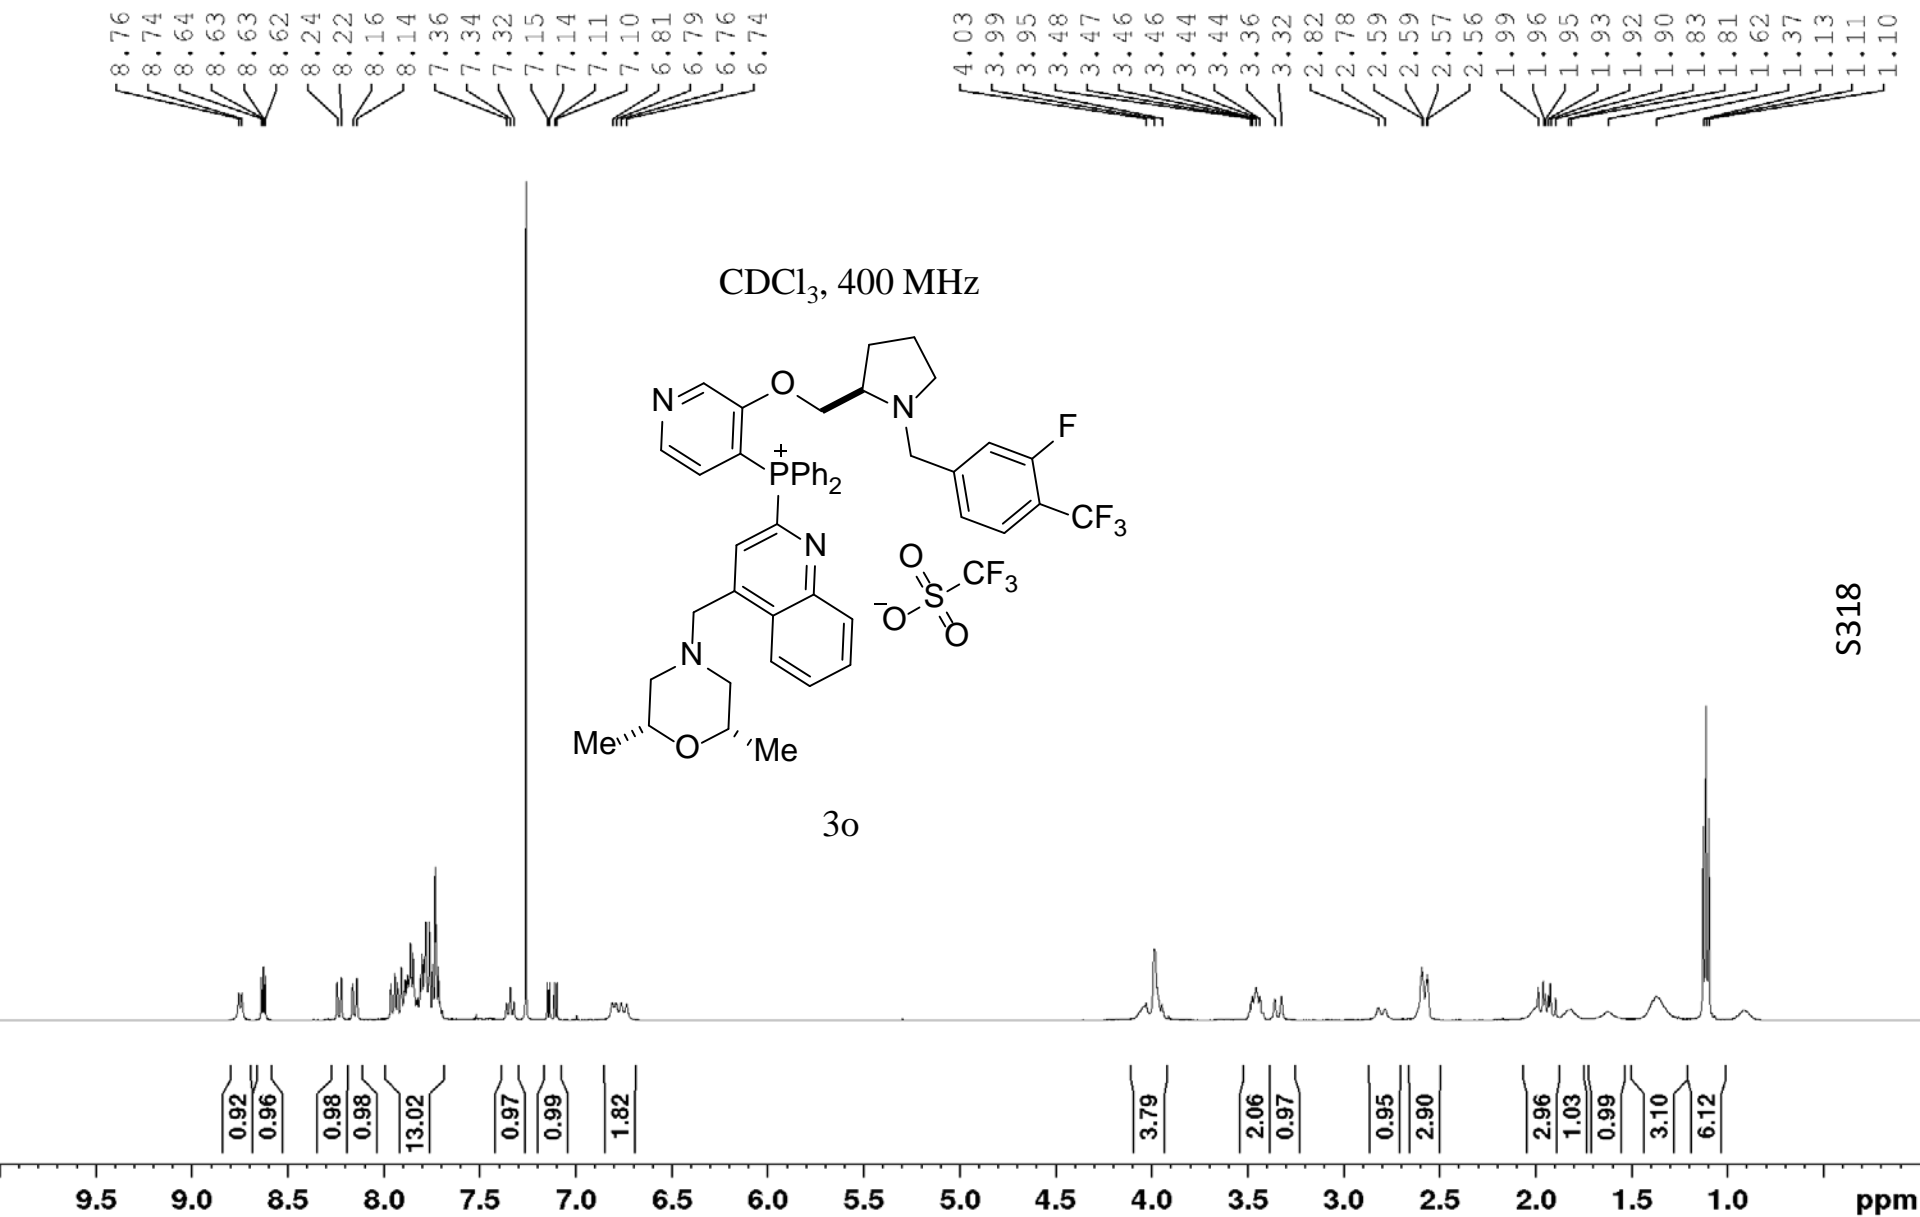

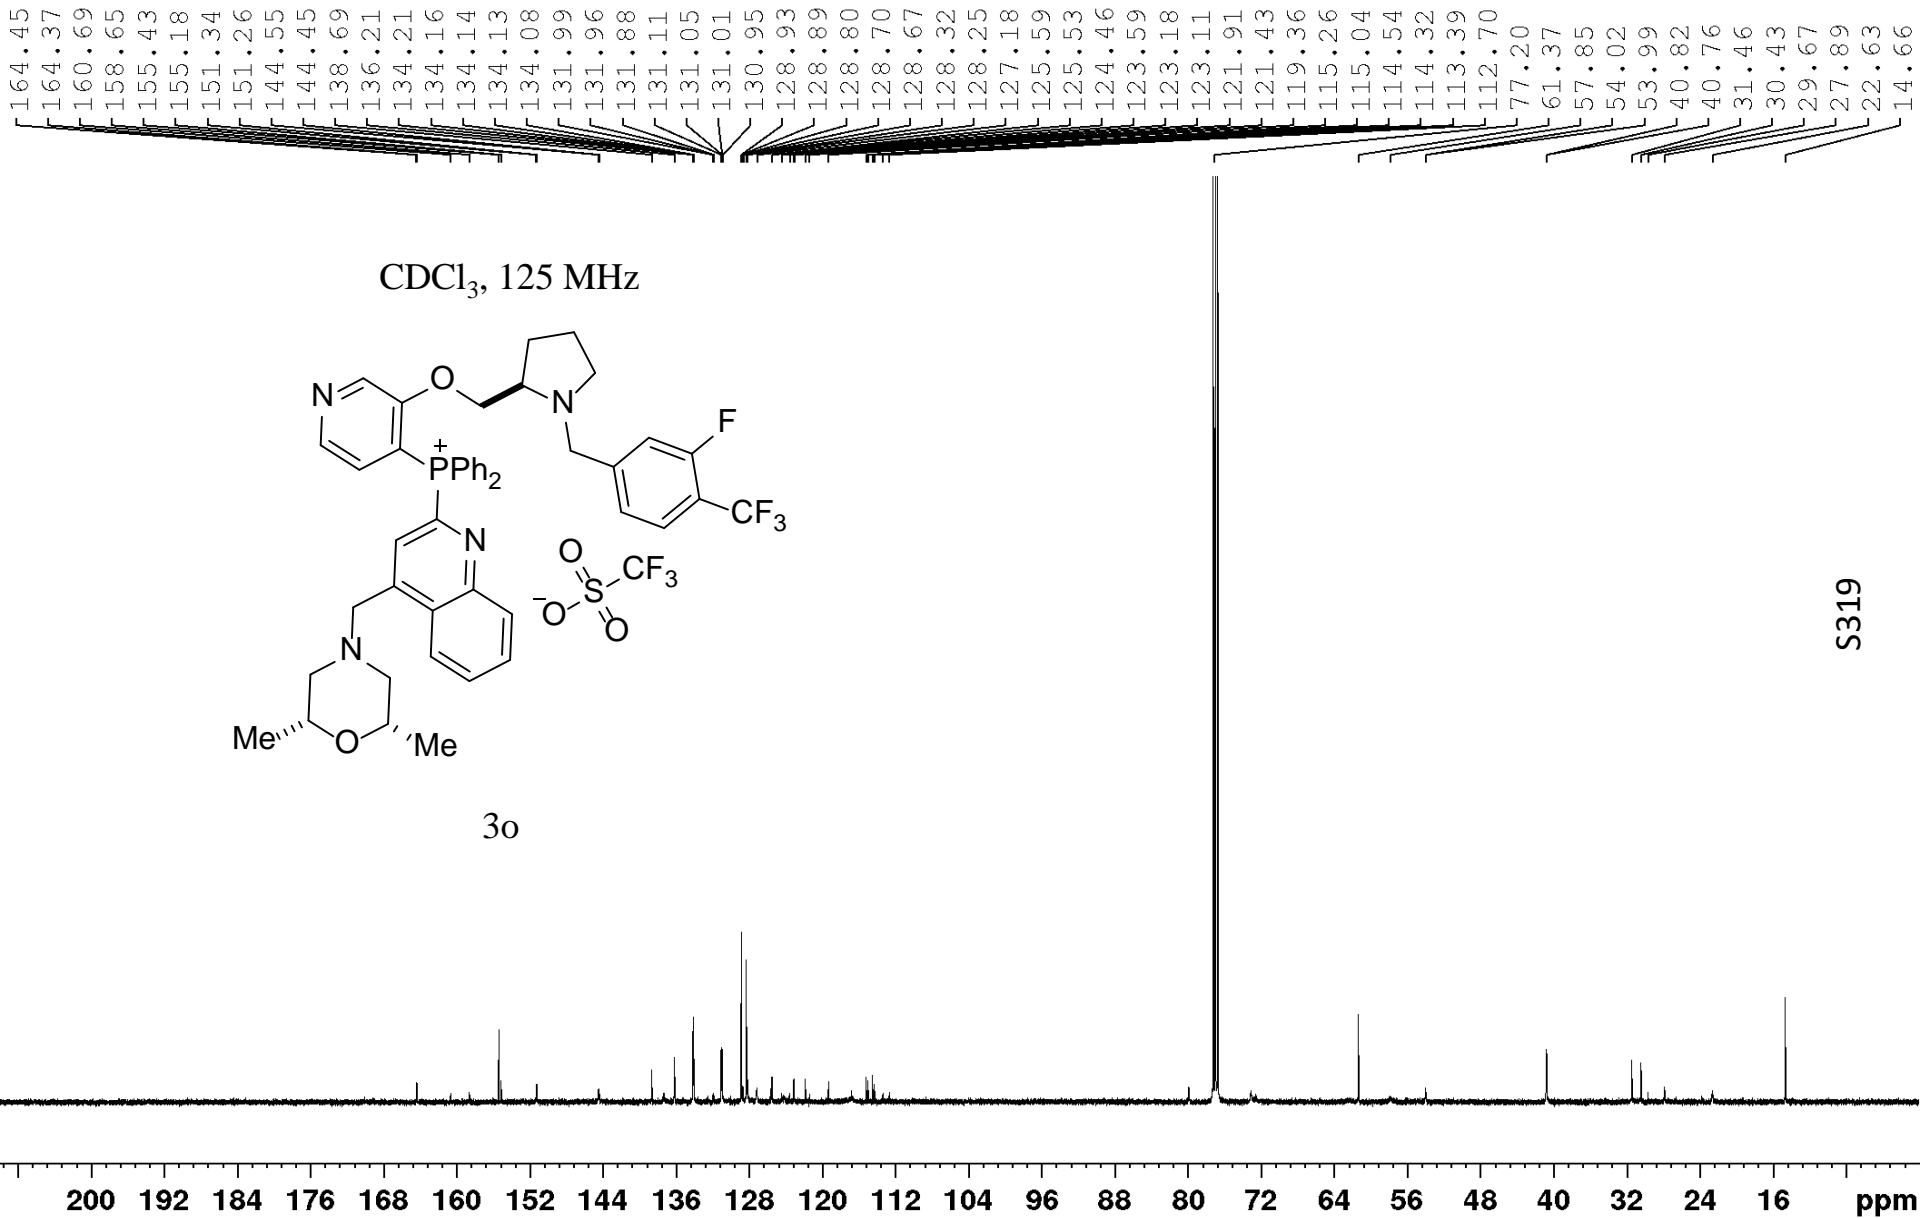

S319

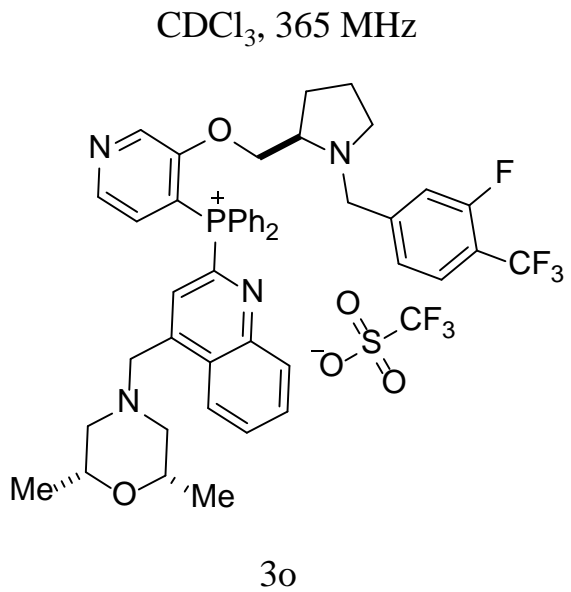

-61.11  
-61.15

-78.14

-114.67  
-114.70

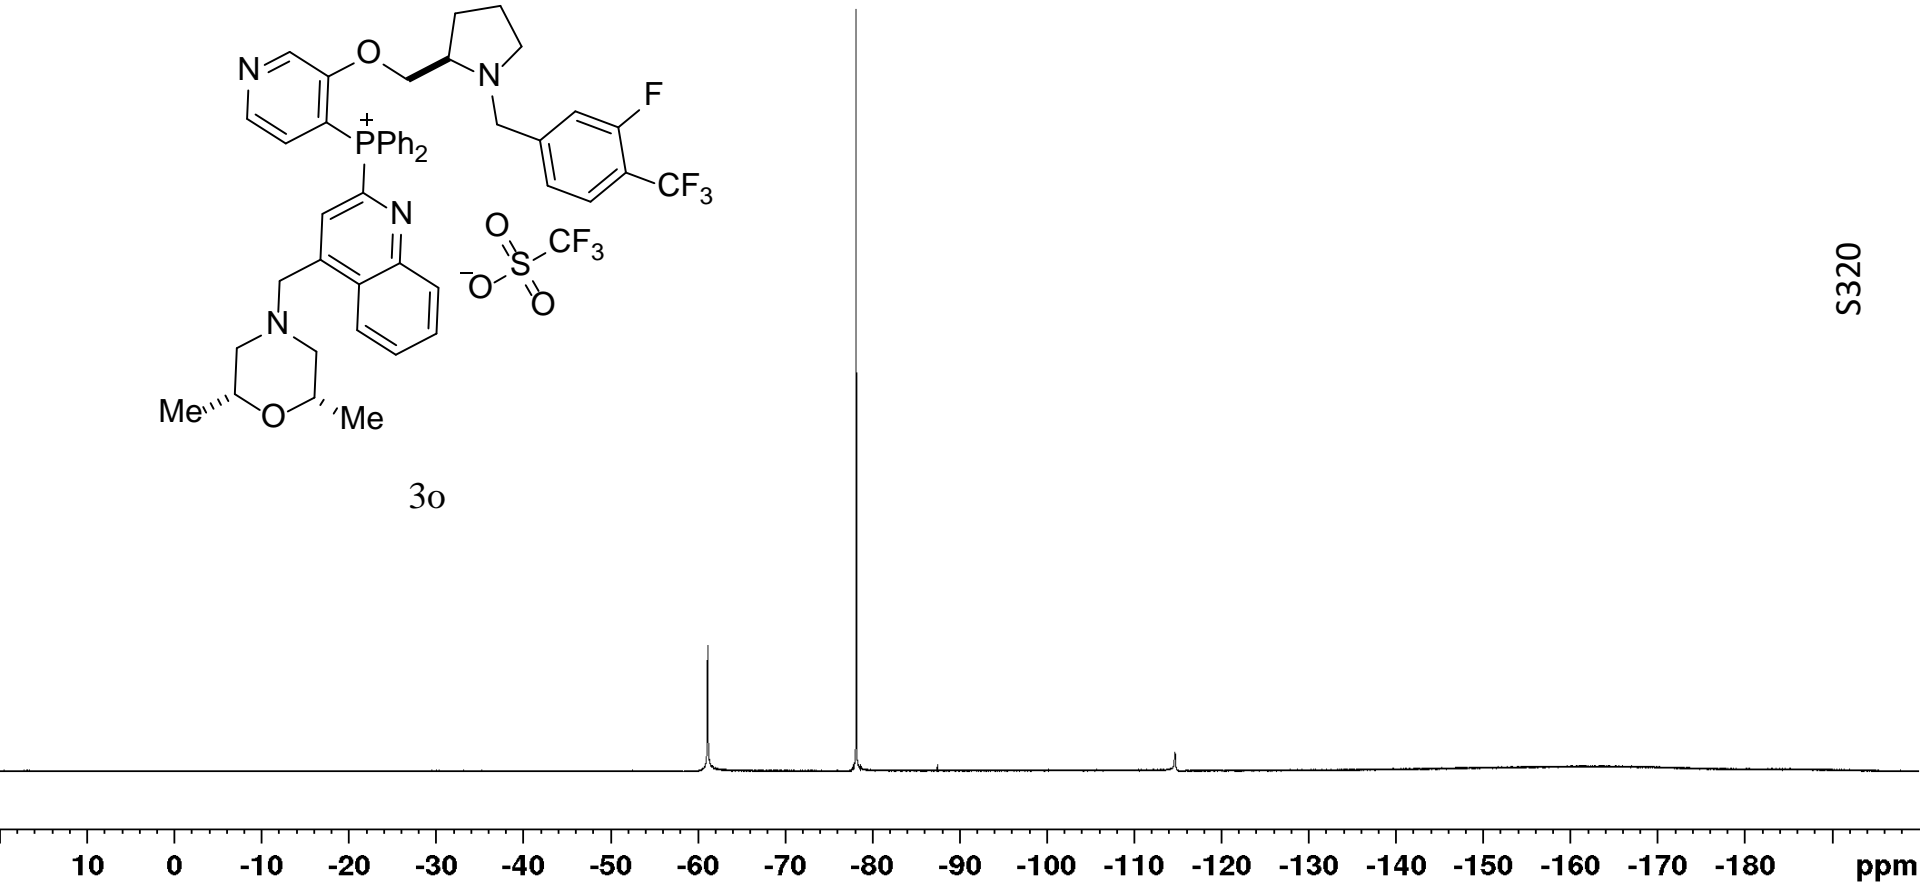



CDCl<sub>3</sub>, 162 MHz

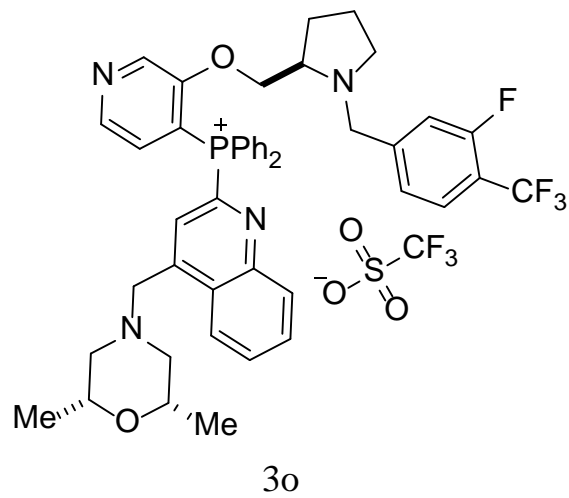

—12.52

S321

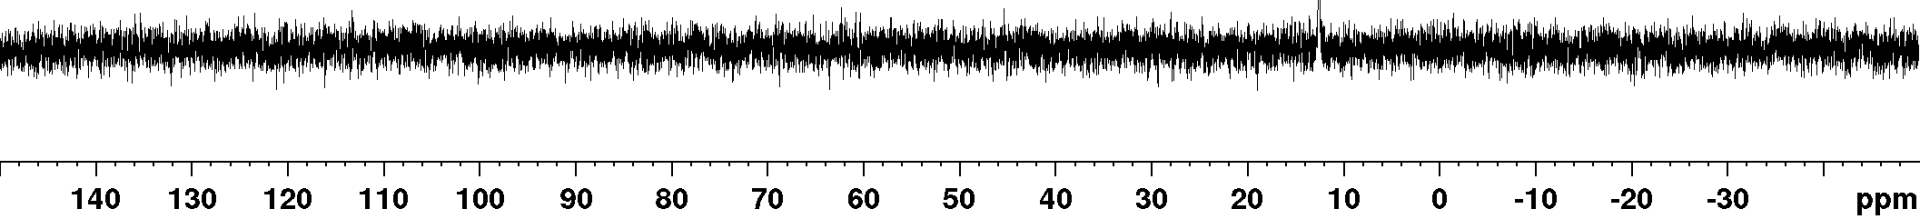

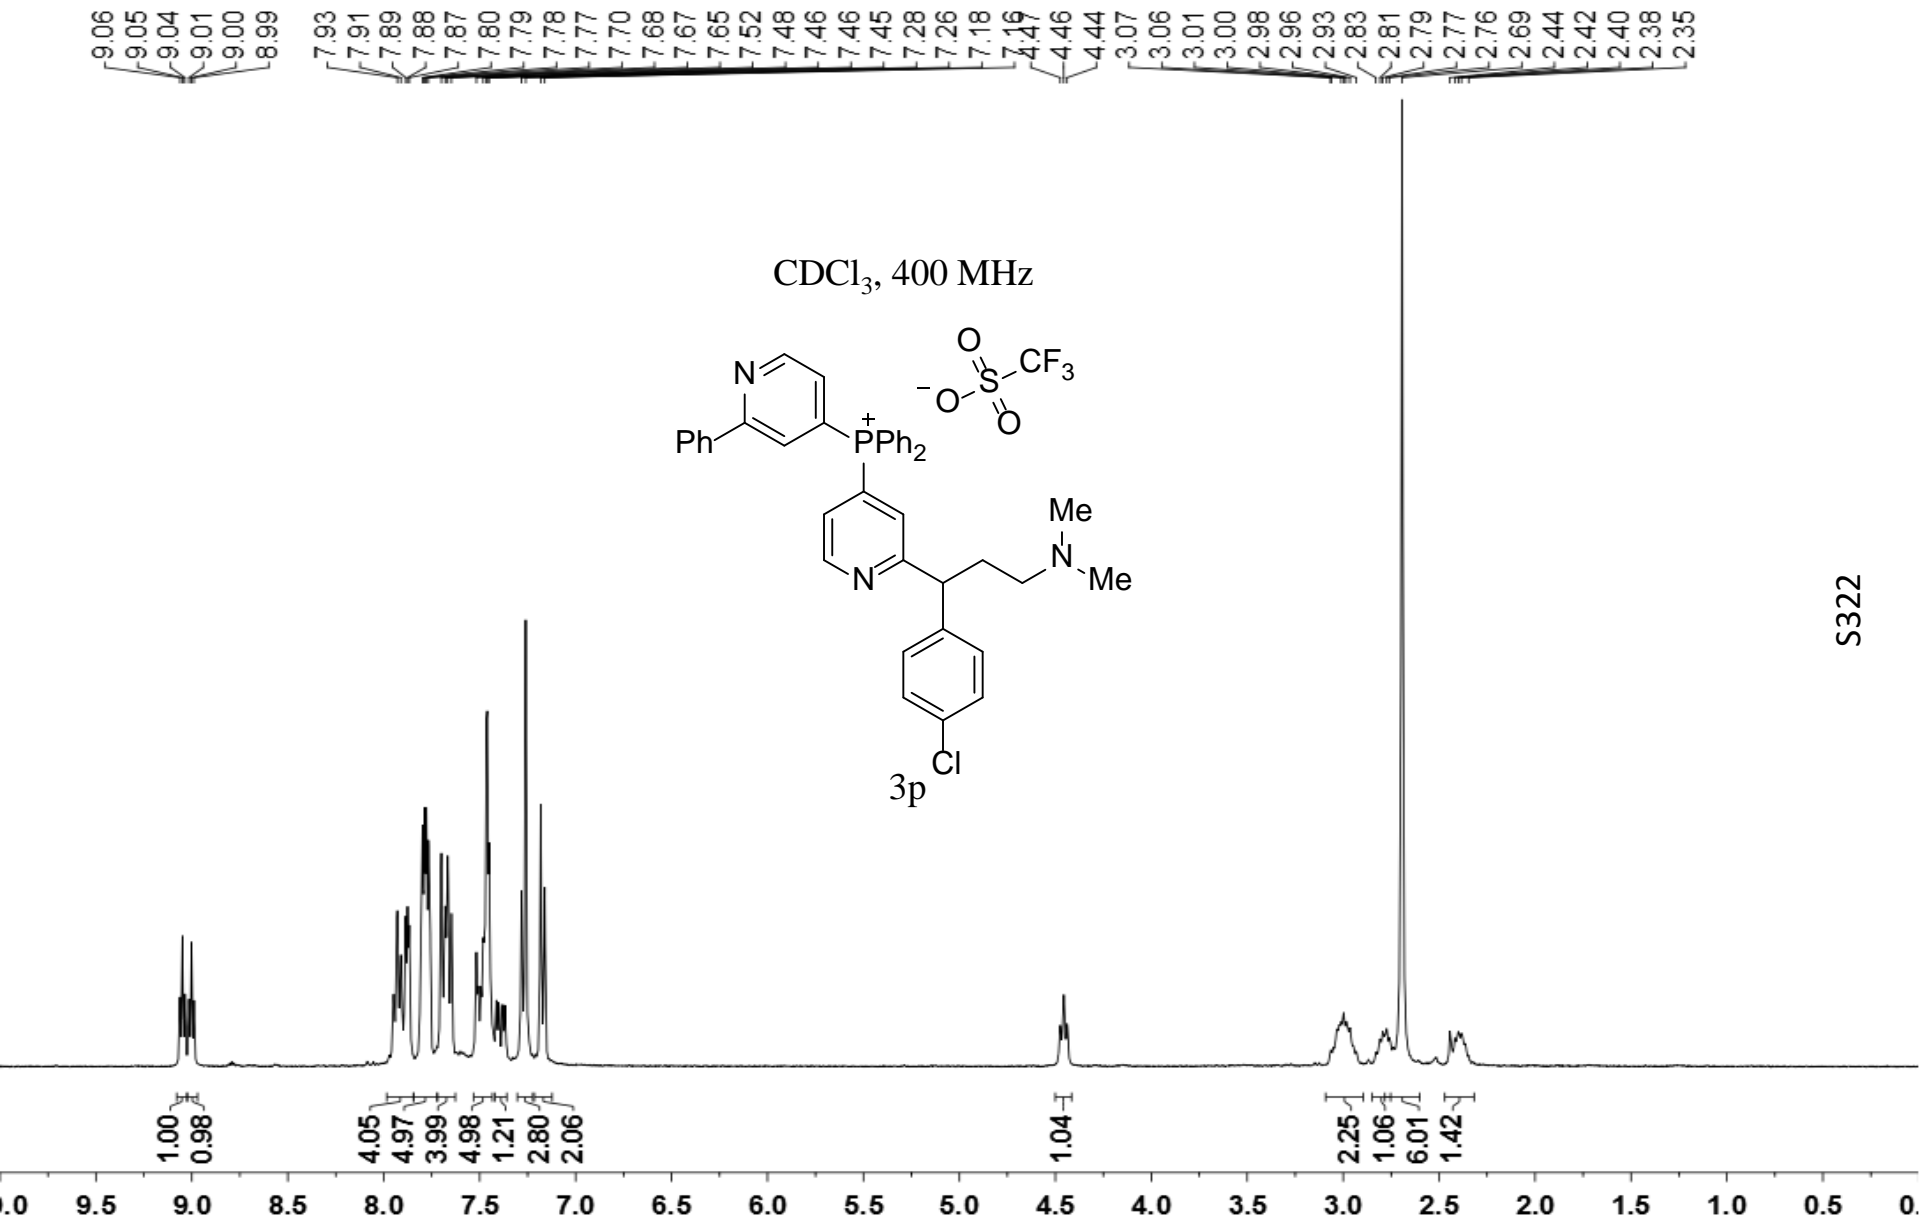

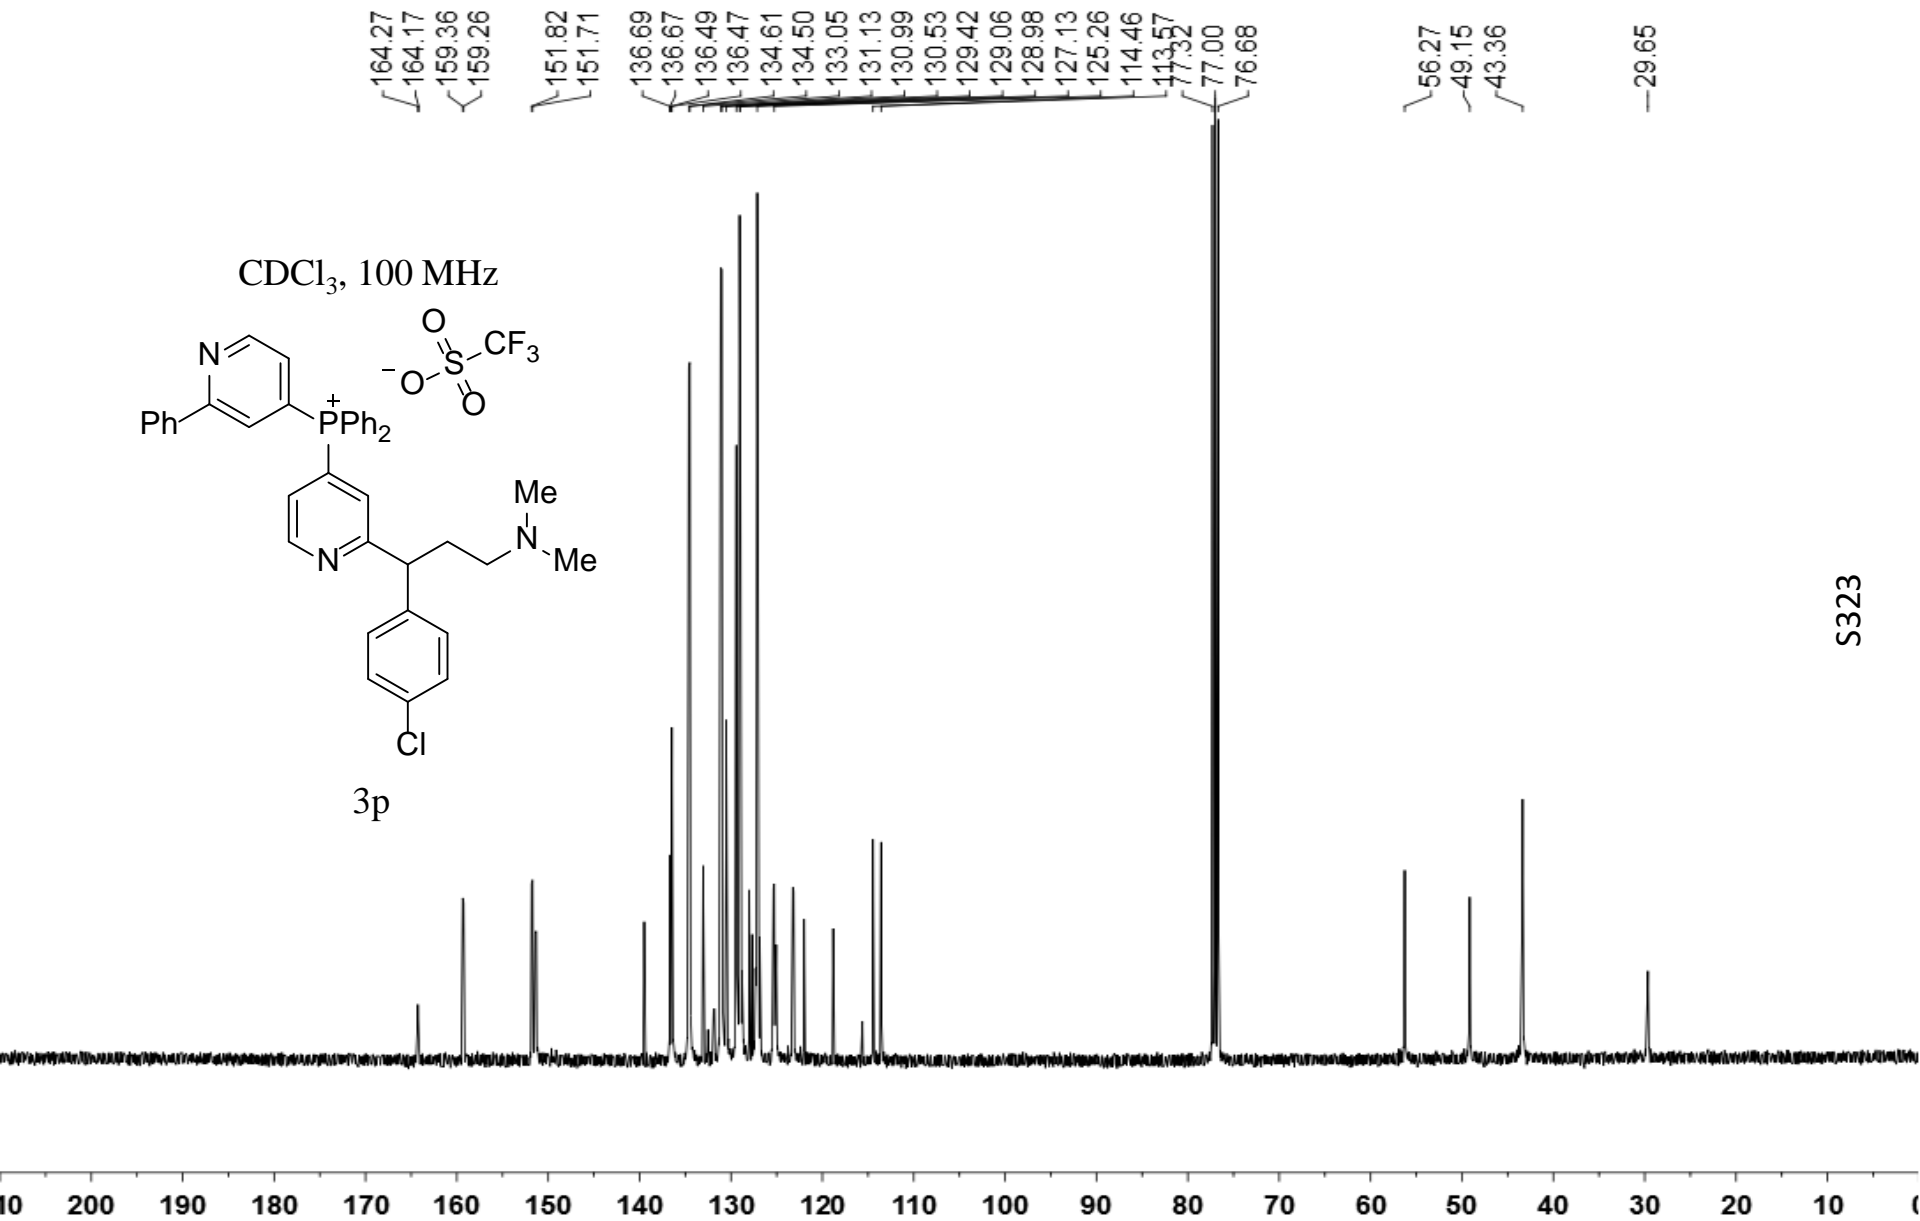

S323

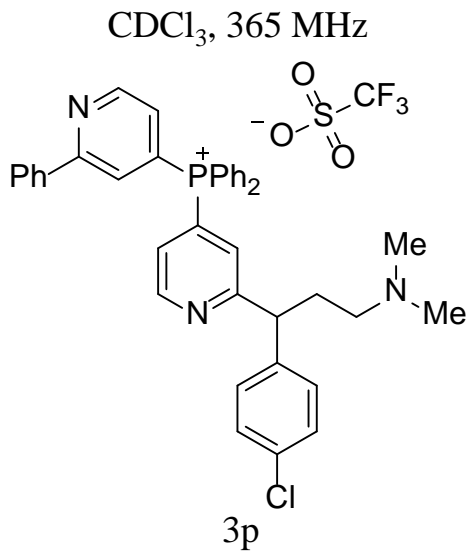

78.30

0 10 0 -10 -20 -30 -40 -50 -60 -70 -80 -90 -110 -130 -150 -170 -190

S324

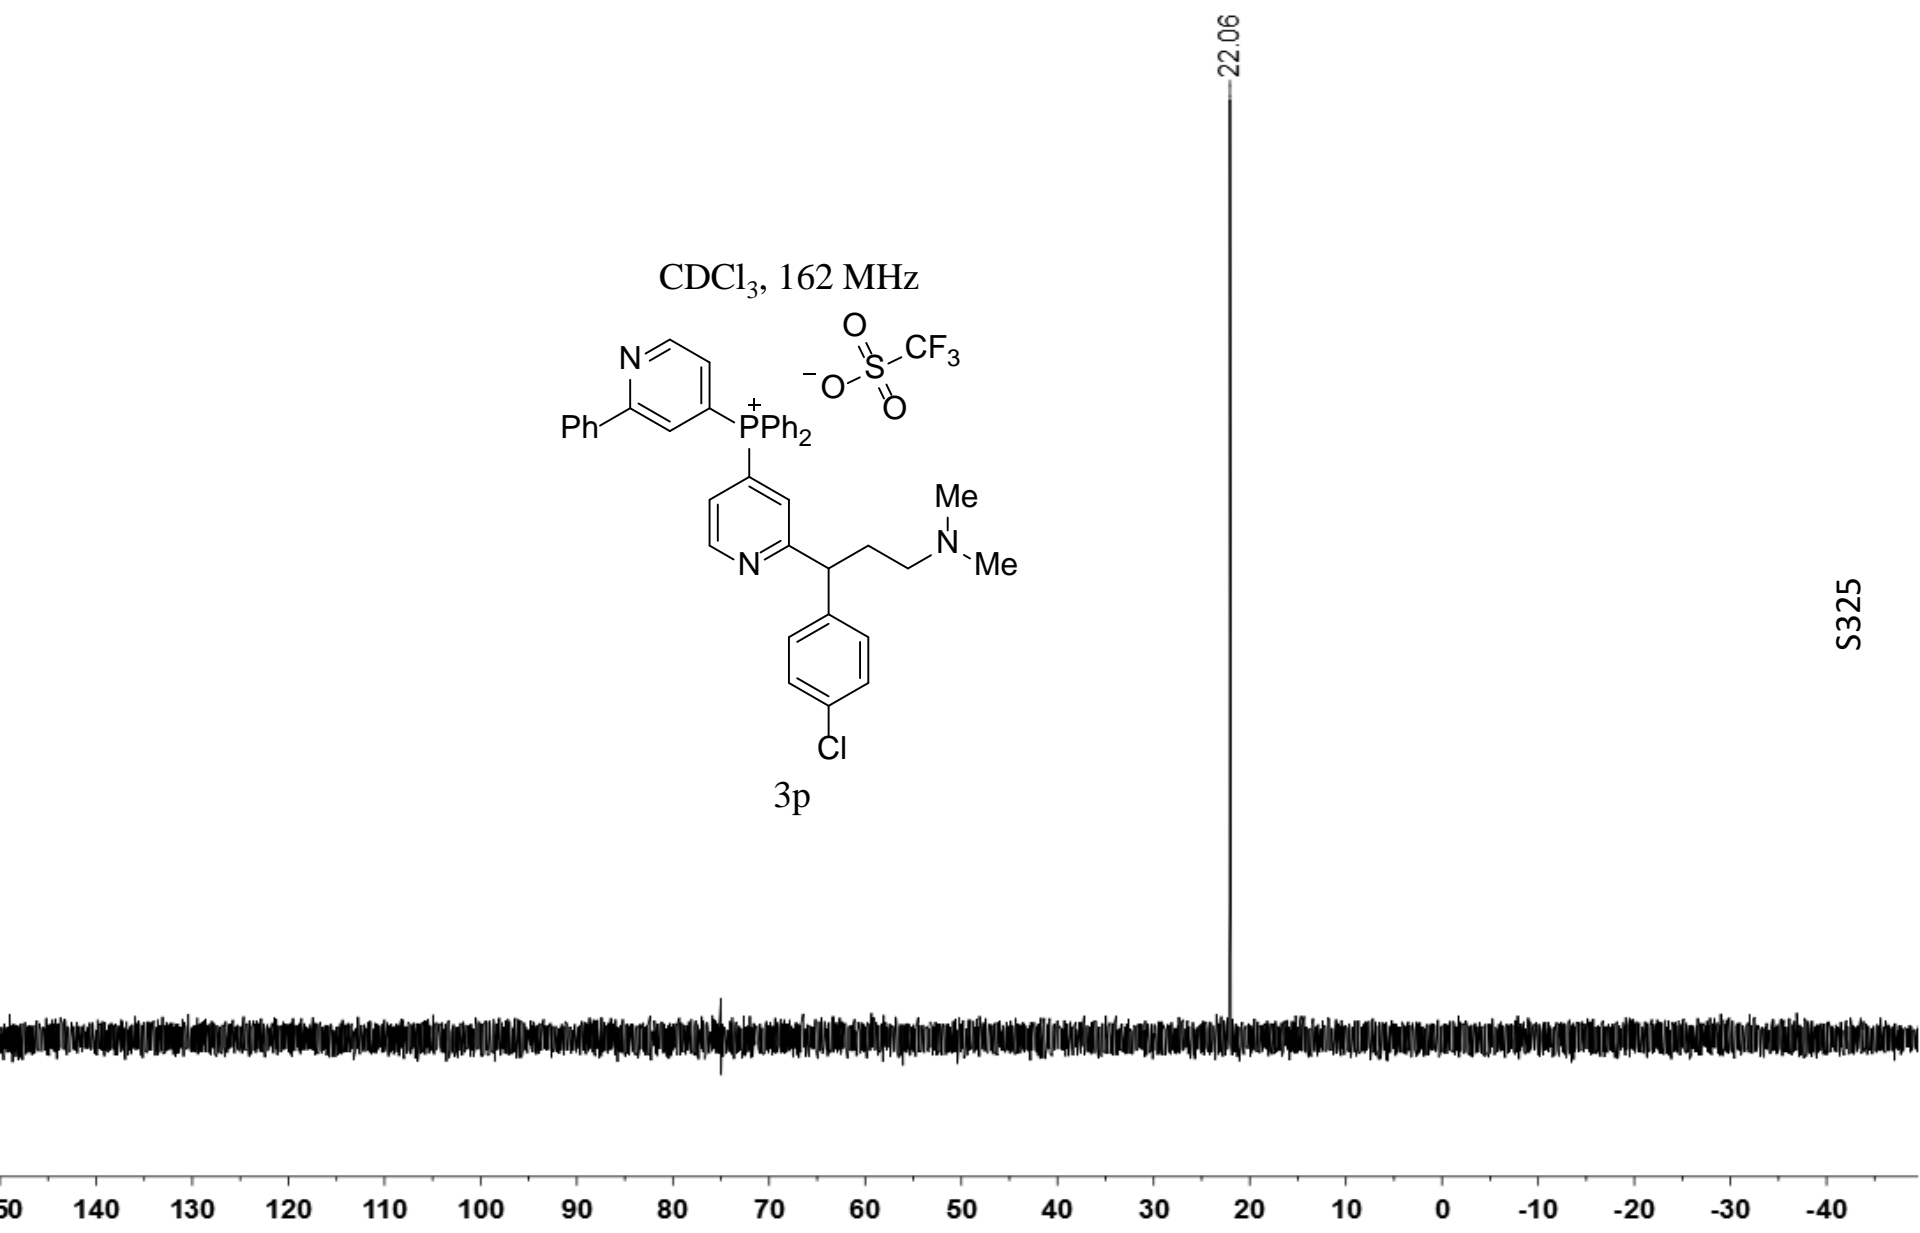

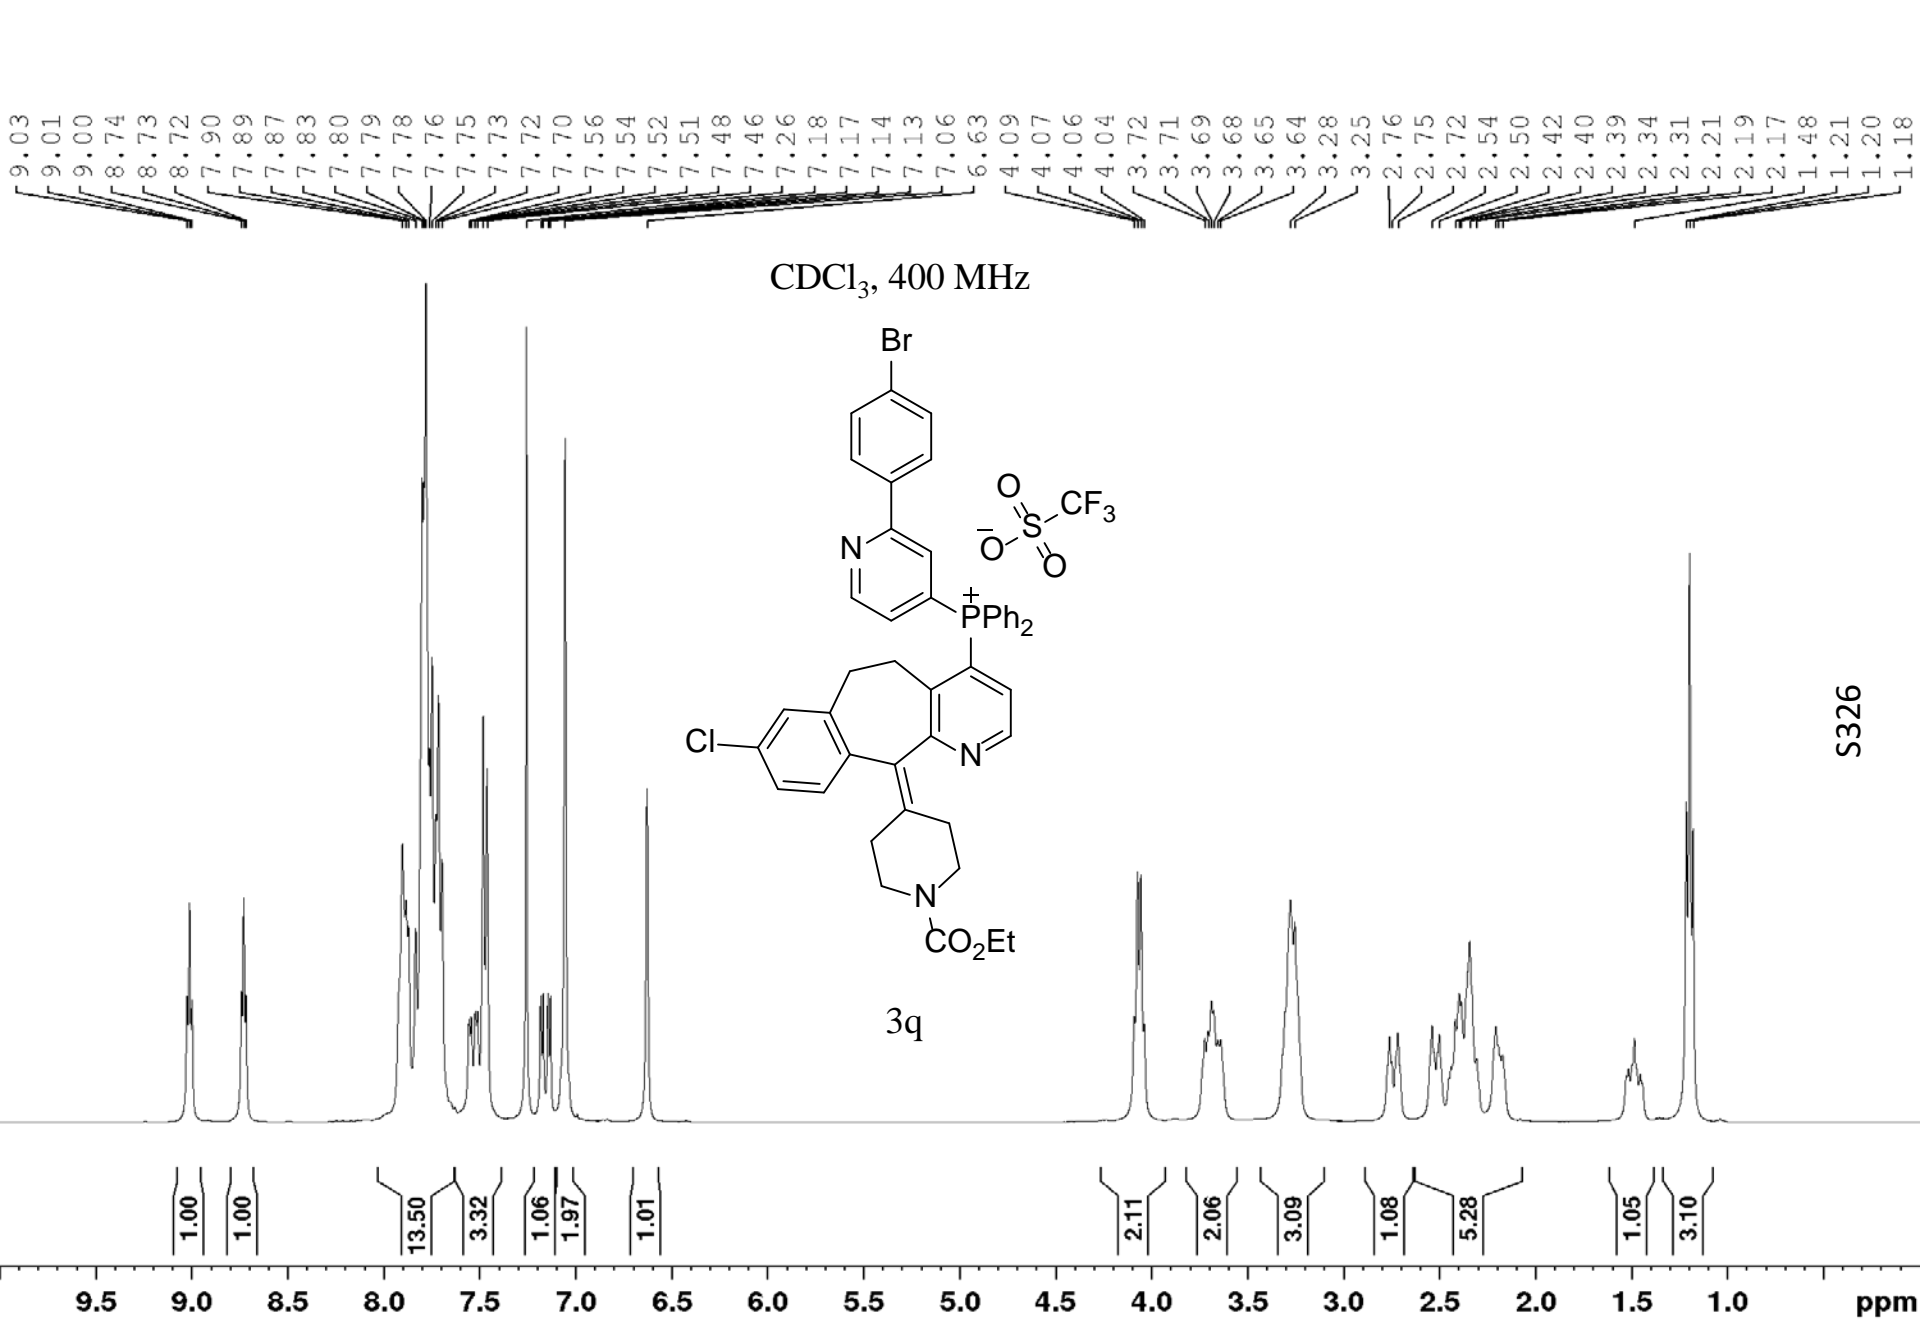

163.38  
163.30  
158.19  
158.09  
155.15  
151.89  
151.78  
149.32  
149.20  
139.30  
136.32  
136.27  
136.20  
135.46  
135.45  
133.83  
133.37  
132.06  
131.41  
129.64  
129.06  
128.23  
127.59  
127.49  
126.28  
125.55  
125.39  
125.31  
125.08  
124.73  
122.99  
122.90  
122.08  
118.89  
115.69  
115.28  
114.83  
114.40  
113.95  
77.32  
77.20  
77.00  
76.68  
61.17  
44.48  
44.34  
30.52  
30.36  
30.31  
30.26  
29.30  
14.45

CDCl<sub>3</sub>, 400 MHz

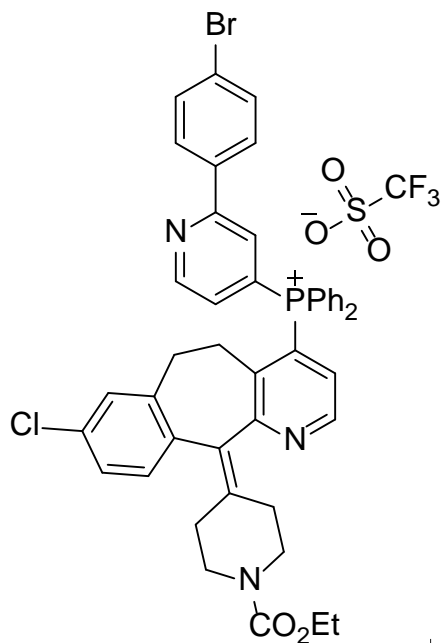

3q

200 192 184 176 168 160 152 144 136 128 120 112 104 96 88 80 72 64 56 48 40 32 24 16 ppm

S327

CDCl<sub>3</sub>, 365 MHz

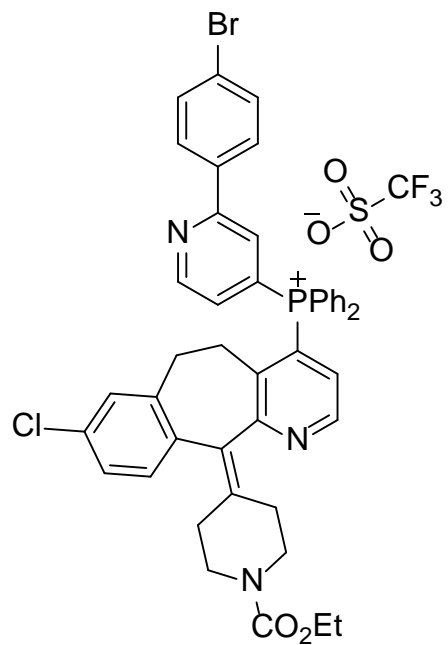

3q

-78.15

0 -10 -20 -30 -40 -50 -60 -70 -80 -90 -100 -110 -120 -130 -140 -150 -160 -170 -180 ppm

S328



CDCl<sub>3</sub>, 162 MHz

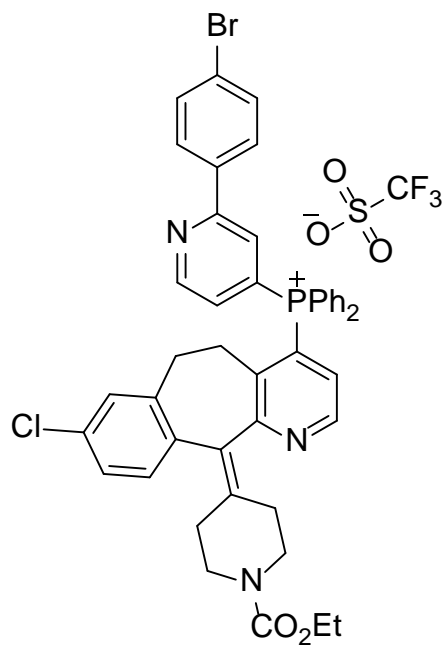

3q

— 20.87

S329

140 130 120 110 100 90 80 70 60 50 40 30 20 10 0 -10 -20 -30 ppm

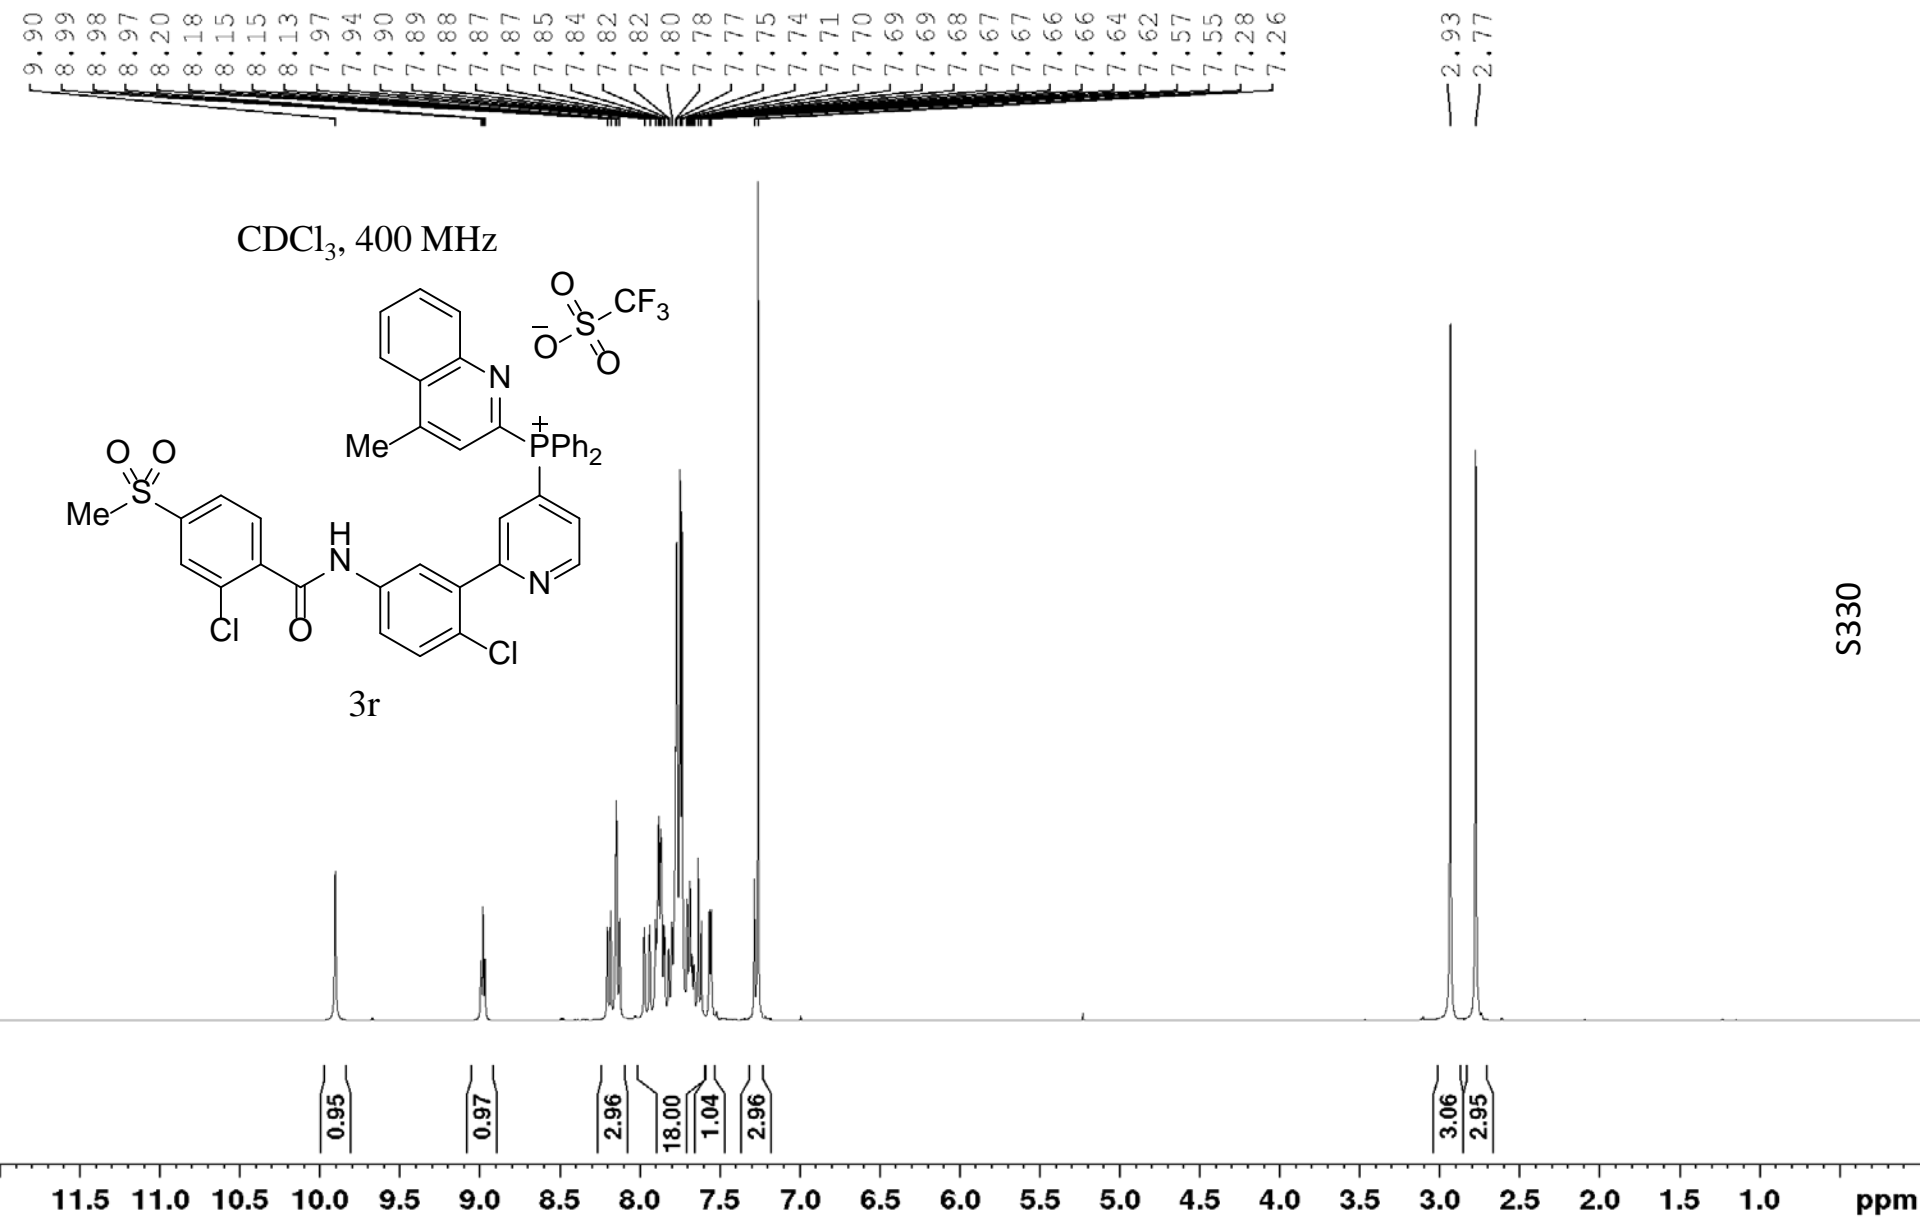

164.27  
158.01  
157.91  
150.92  
150.81  
148.82  
148.71  
148.58  
148.35  
143.24  
142.04  
140.23  
137.66  
136.80  
136.79  
136.07  
136.04  
134.63  
134.53  
132.23  
131.83  
130.75  
130.62  
130.52  
130.29  
129.85  
128.87  
128.78  
128.75  
128.45  
128.33  
128.04  
126.35  
125.86  
125.78  
125.59  
125.24  
125.02  
124.97  
124.31  
123.07  
122.38  
121.83  
118.64  
115.75  
114.88  
77.32  
77.20  
77.00  
76.68  
44.14

CDCl<sub>3</sub>, 100 MHz

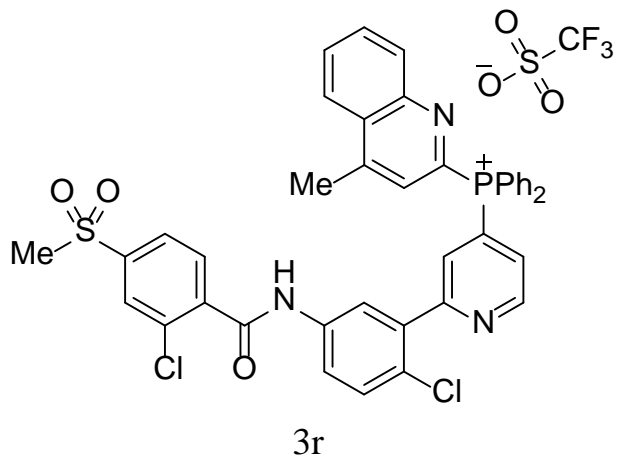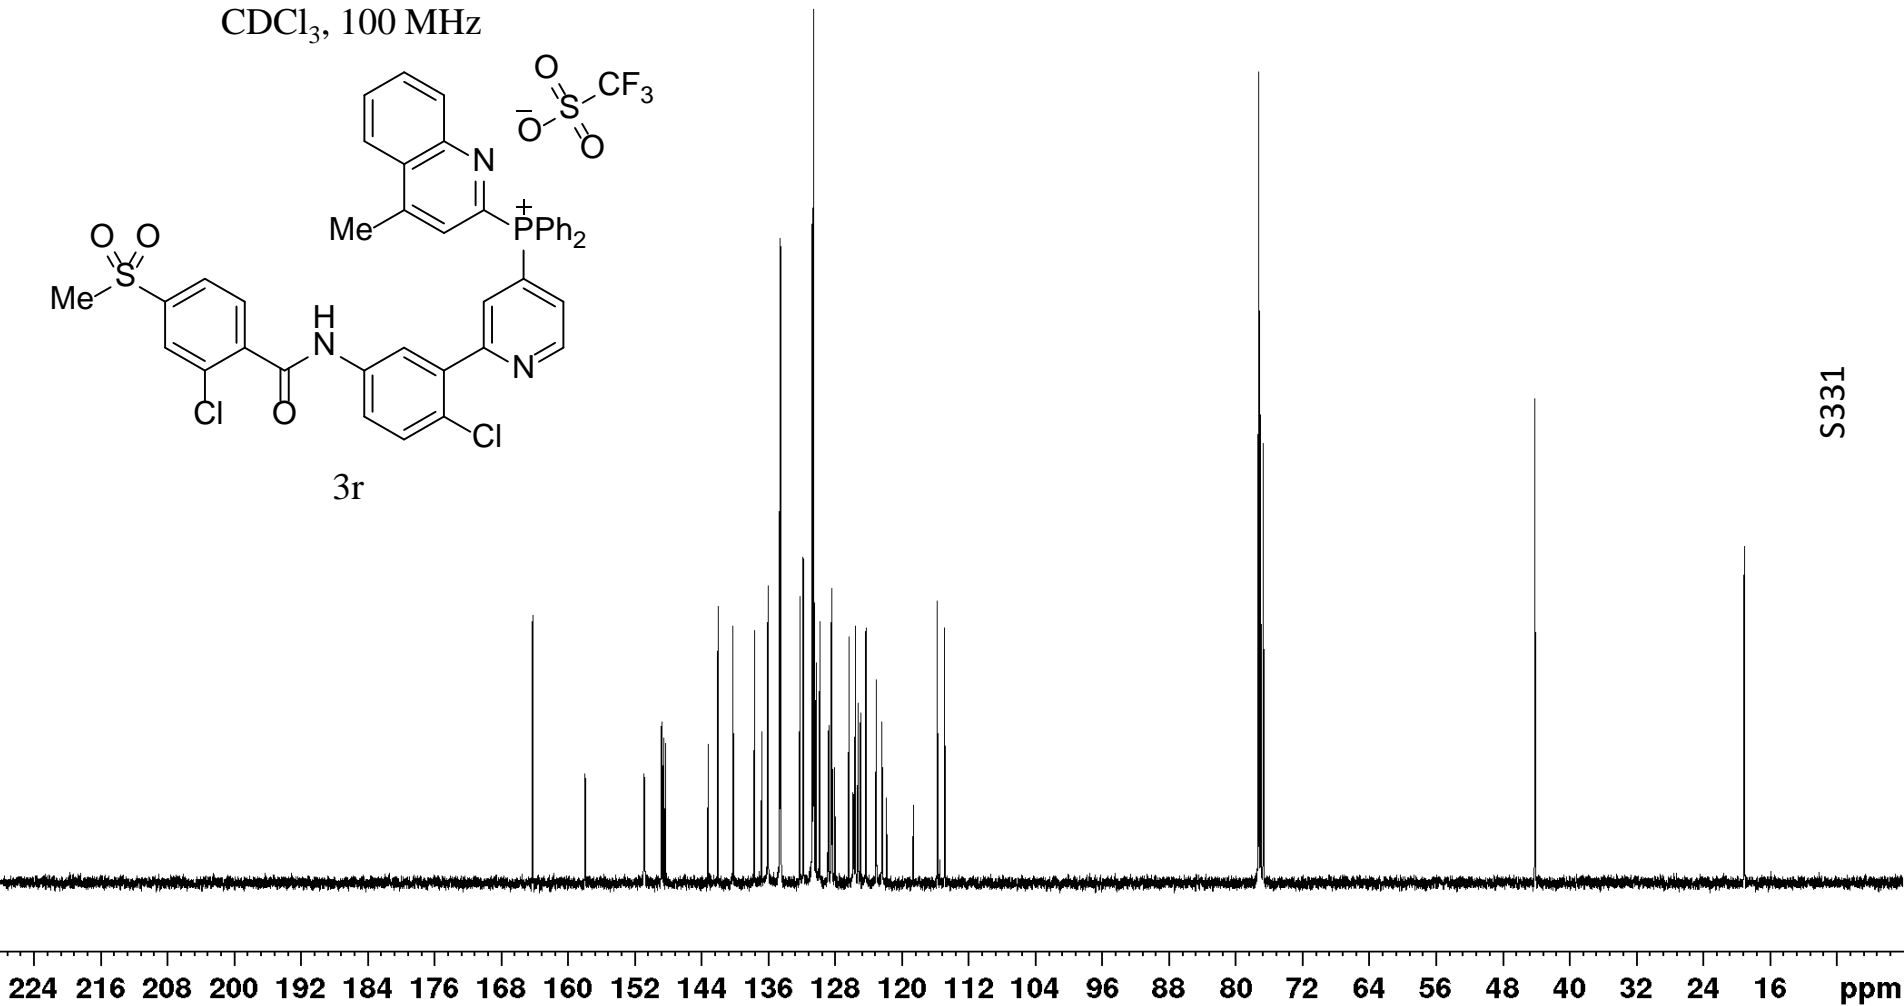

19.06  
19.04

S331

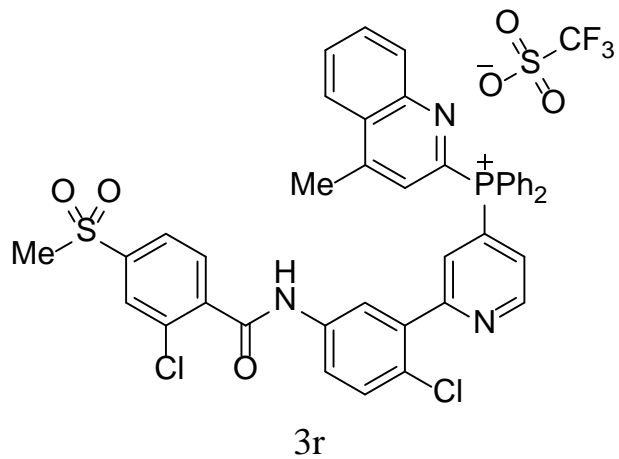

—78.30

0 -10 -20 -30 -40 -50 -60 -70 -80 -90 -100 -110 -120 -130 -140 -150 -160 -170 -180 ppm

S332

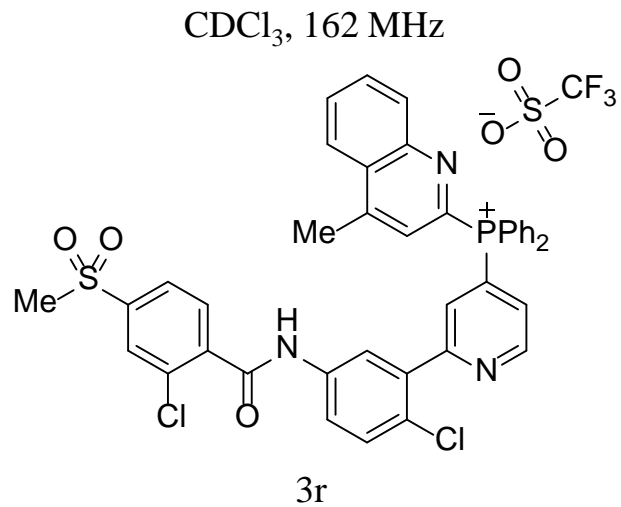

— 13.30

S333

140 130 120 110 100 90 80 70 60 50 40 30 20 10 0 -10 -20 -30 ppm

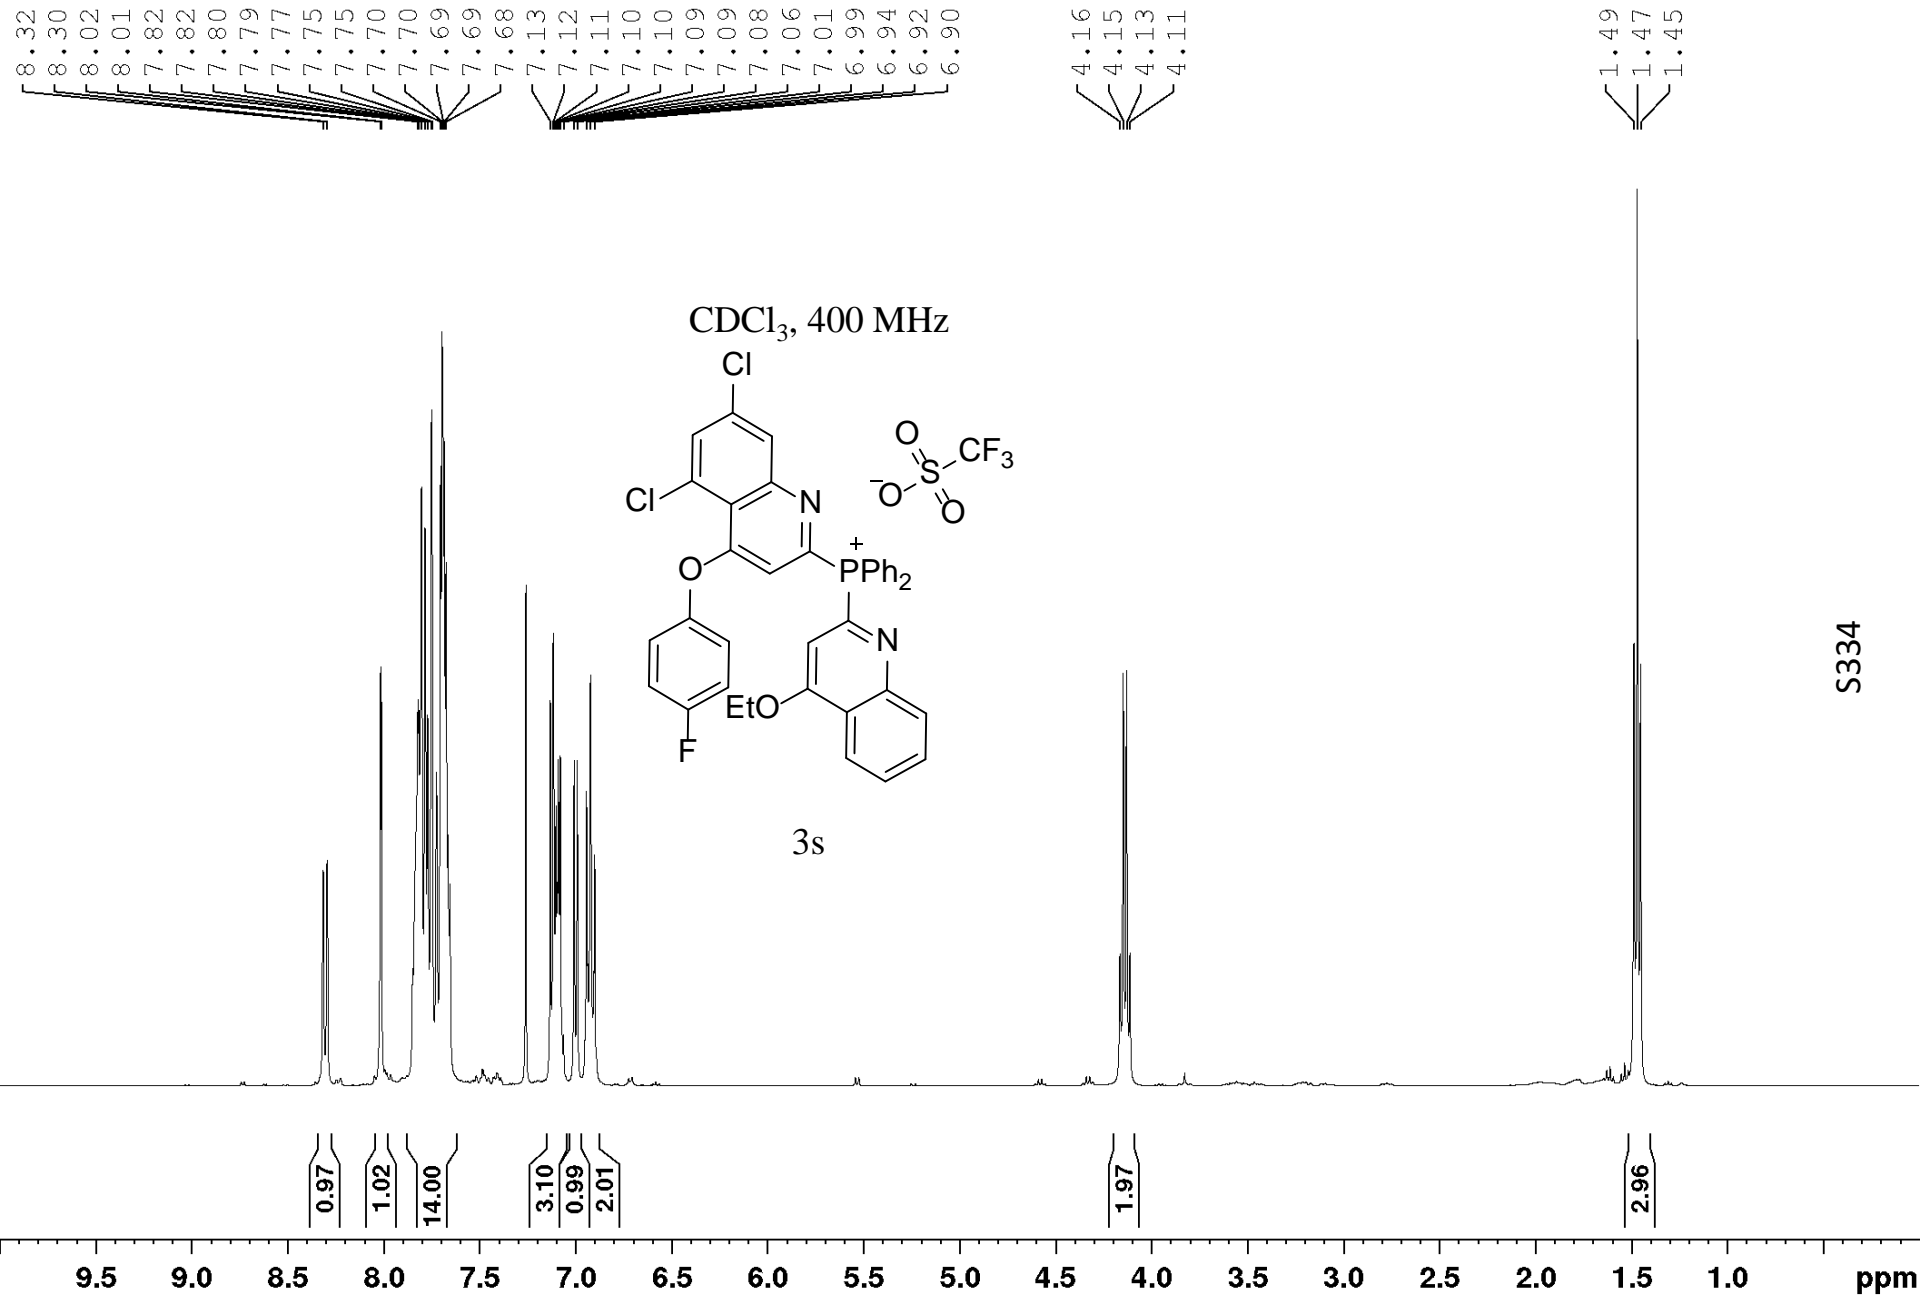

163.37  
163.23  
161.49  
159.05  
151.81  
151.56  
149.36  
149.11  
148.88  
148.15  
148.12  
147.71  
145.15  
143.98  
136.97  
135.55  
135.52  
134.73  
134.63  
132.24  
131.96  
131.68  
131.10  
131.09  
130.33  
130.20  
129.13  
127.99  
122.82  
122.73  
122.45  
122.23  
121.57  
121.55  
119.04  
118.18  
118.15  
117.21  
116.98  
116.95  
116.08  
111.06  
110.80  
106.07  
105.78  
65.51

CDCl<sub>3</sub>, 100 MHz

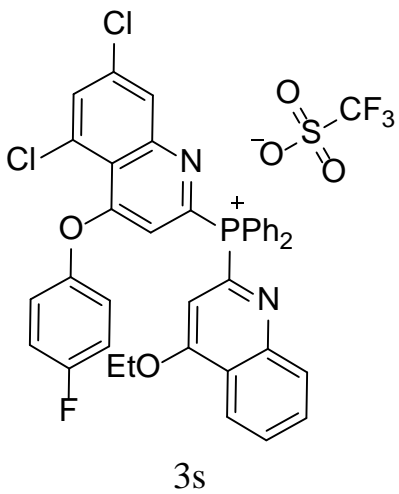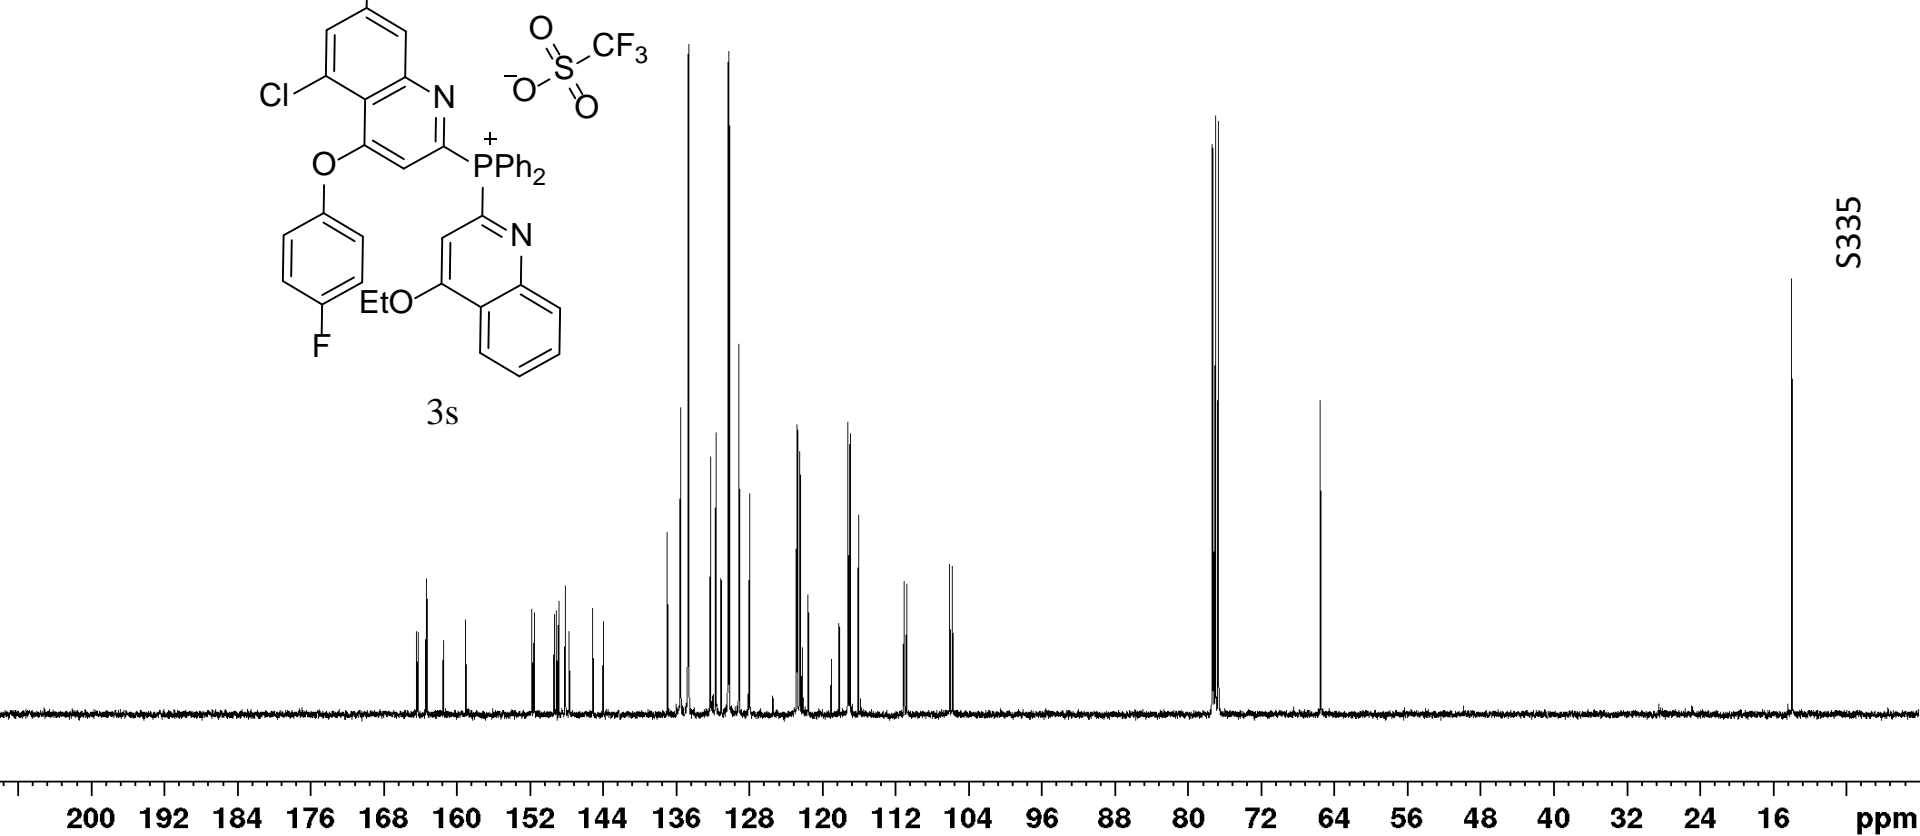

— 13.93

S335

CDCl<sub>3</sub>, 365 MHz

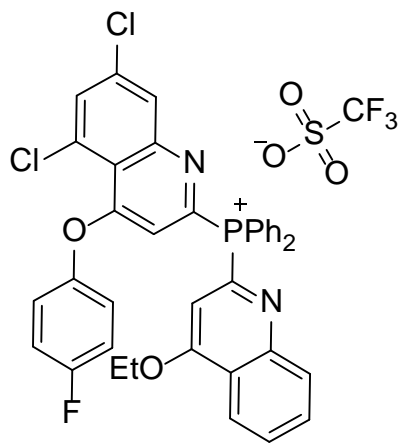

3s

— -78.29

-114.97  
-114.99  
-115.00  
-115.01  
-115.02  
-115.03  
-115.04

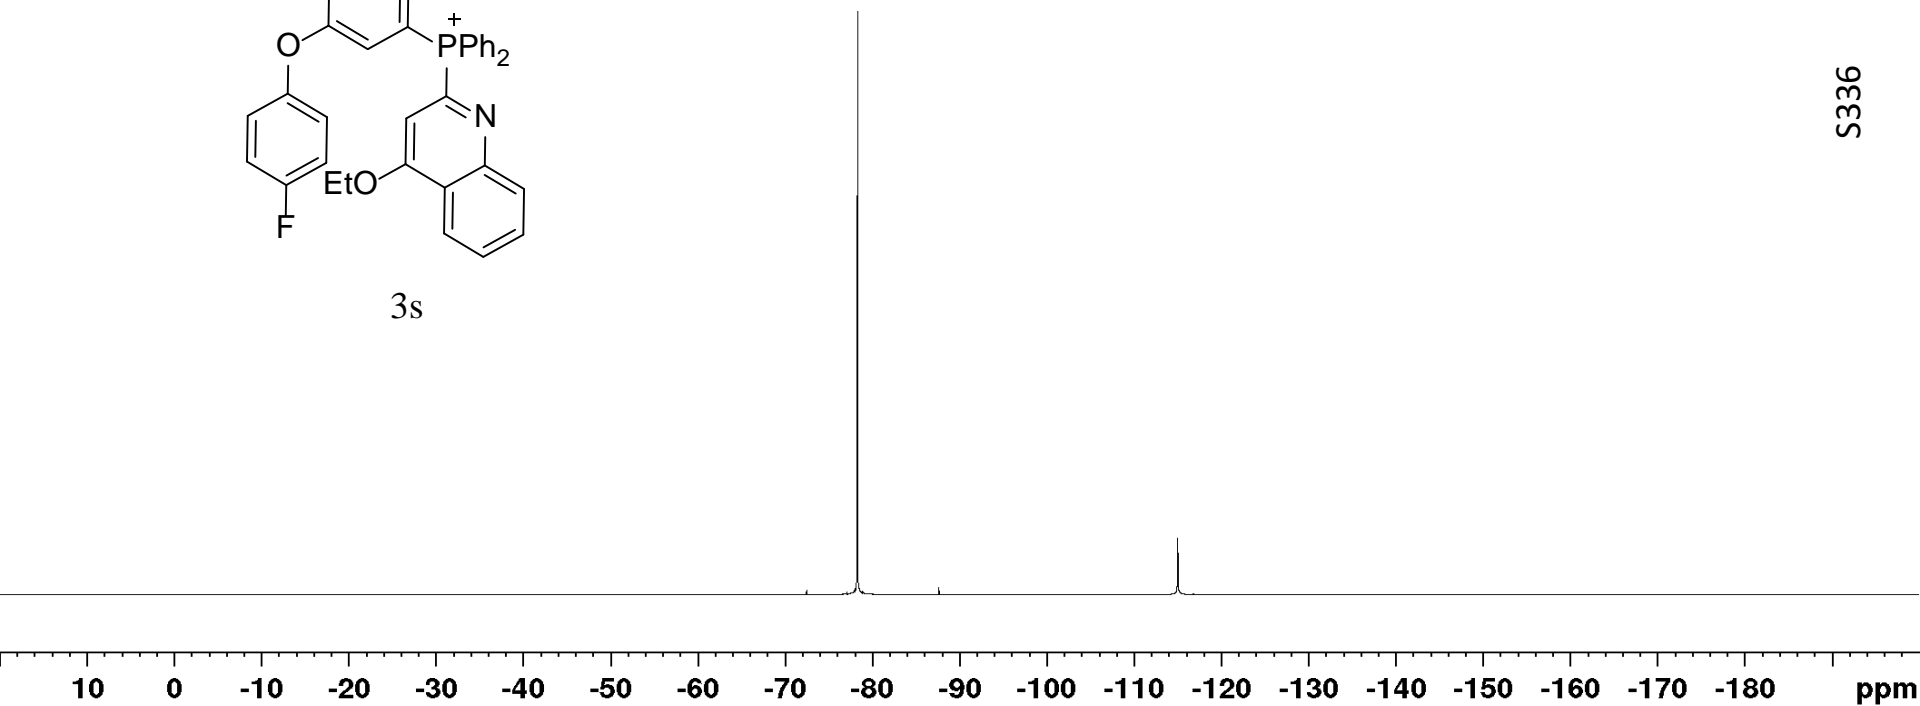

S336



CDCl<sub>3</sub>, 162 MHz

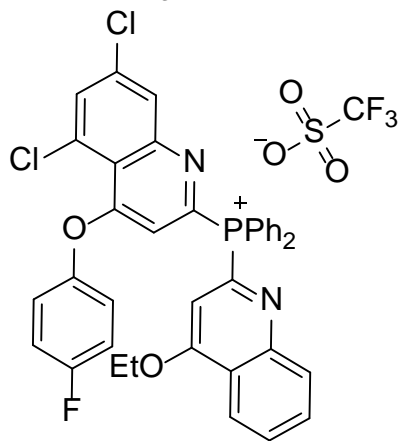

3s

— 8.41

S337

140 130 120 110 100 90 80 70 60 50 40 30 20 10 0 -10 -20 -30 ppm

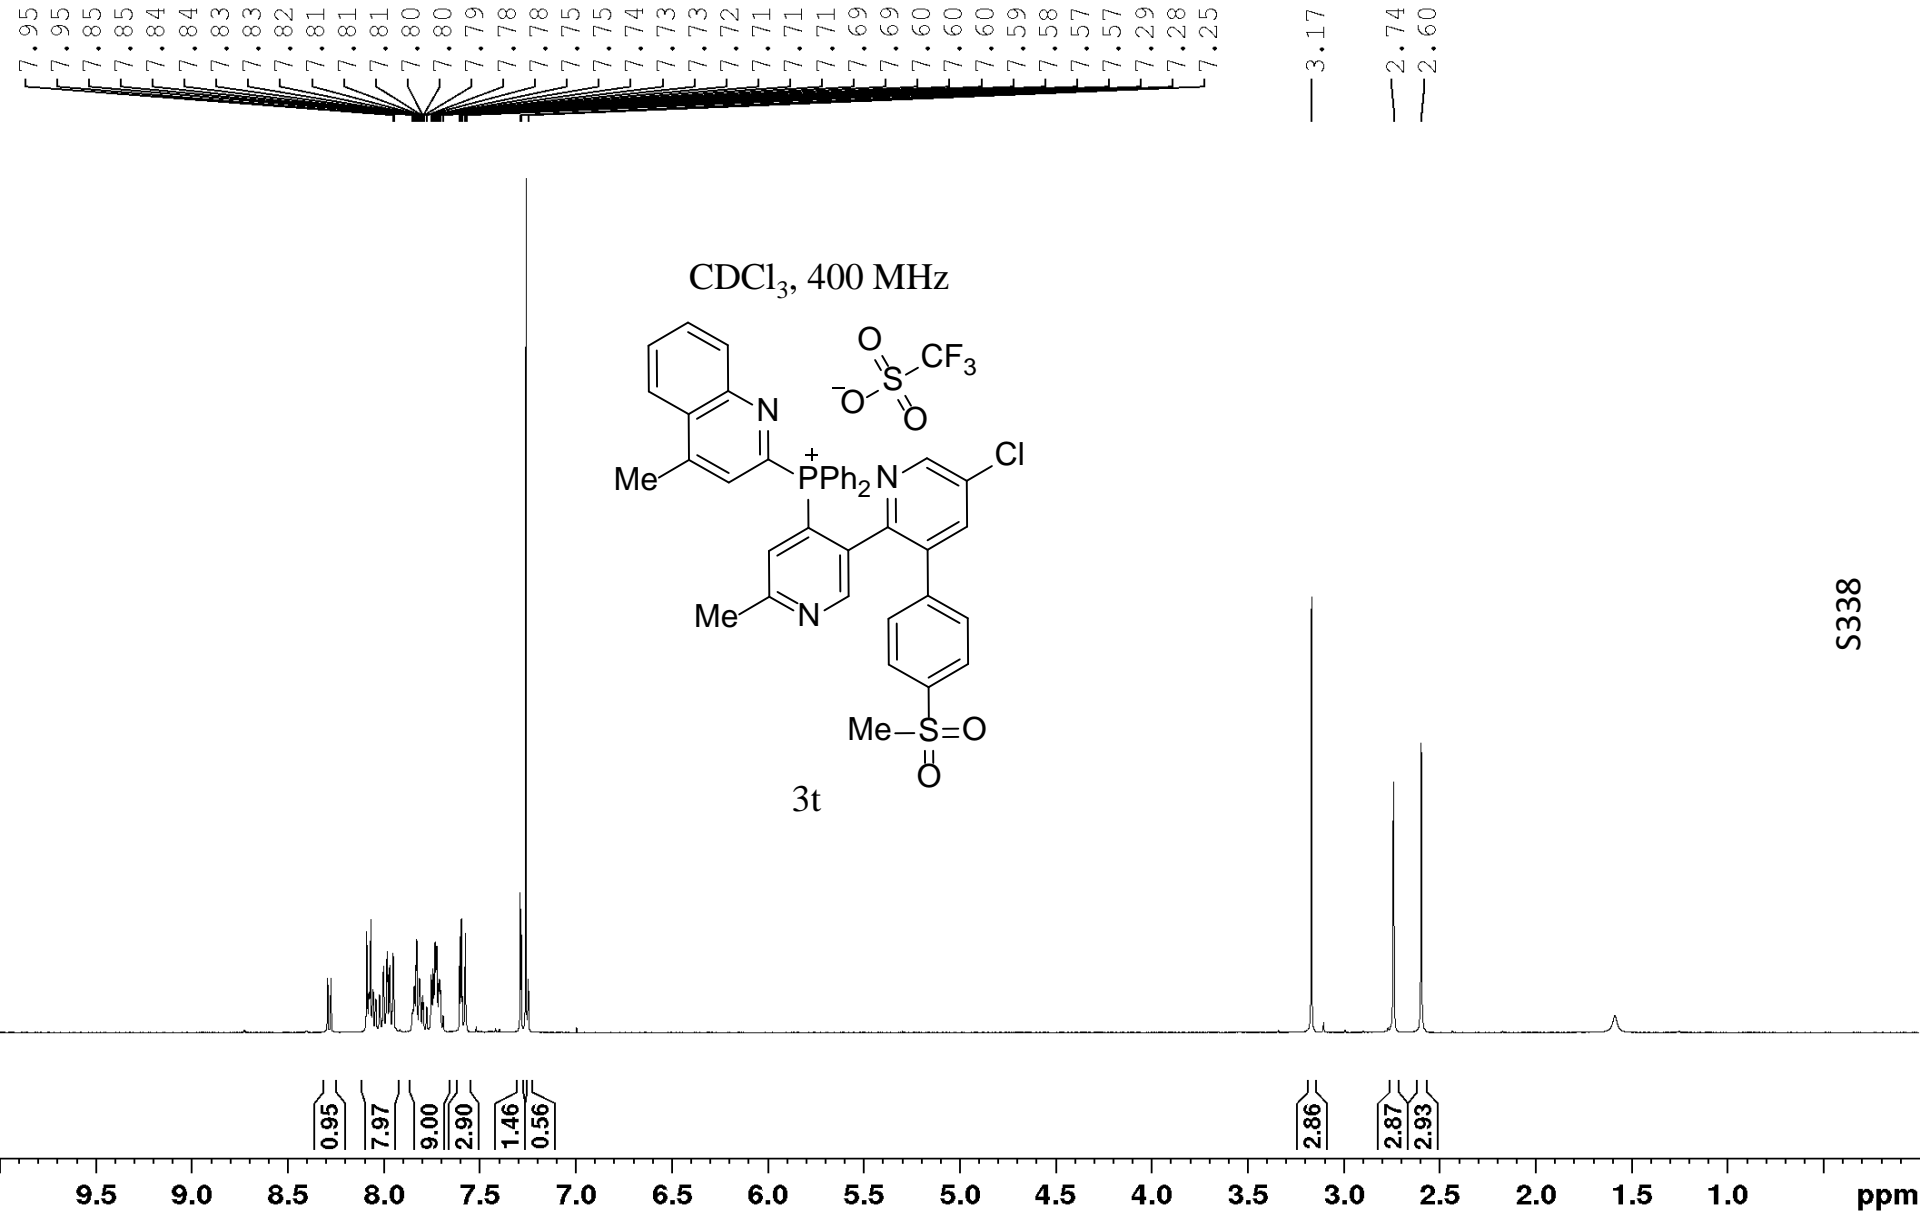

152.11  
 152.04  
 148.29  
 148.18  
 147.99  
 147.97  
 147.72  
 147.44  
 147.20  
 146.47  
 146.15  
 141.55  
 141.15  
 138.54  
 135.30  
 135.29  
 135.15  
 135.12  
 134.90  
 134.80  
 133.40  
 133.37  
 131.95  
 131.71  
 130.76  
 130.66  
 130.23  
 130.10  
 130.04  
 129.75  
 129.74  
 129.29  
 128.43  
 128.36  
 128.13  
 128.10  
 125.62  
 124.45  
 123.66  
 123.39  
 122.43  
 119.75  
 119.23  
 118.87

— 44.14  
 — 24.62  
 < 18.84  
 < 18.83

CDCl<sub>3</sub>, 100 MHz

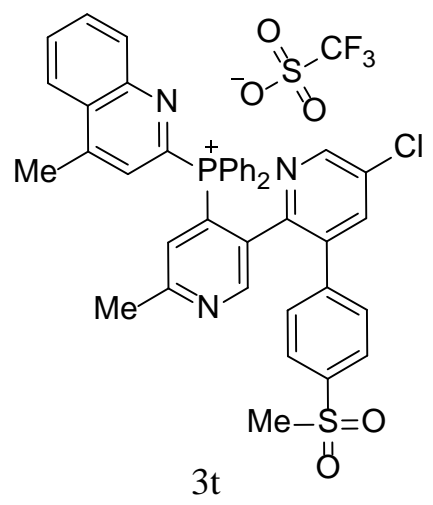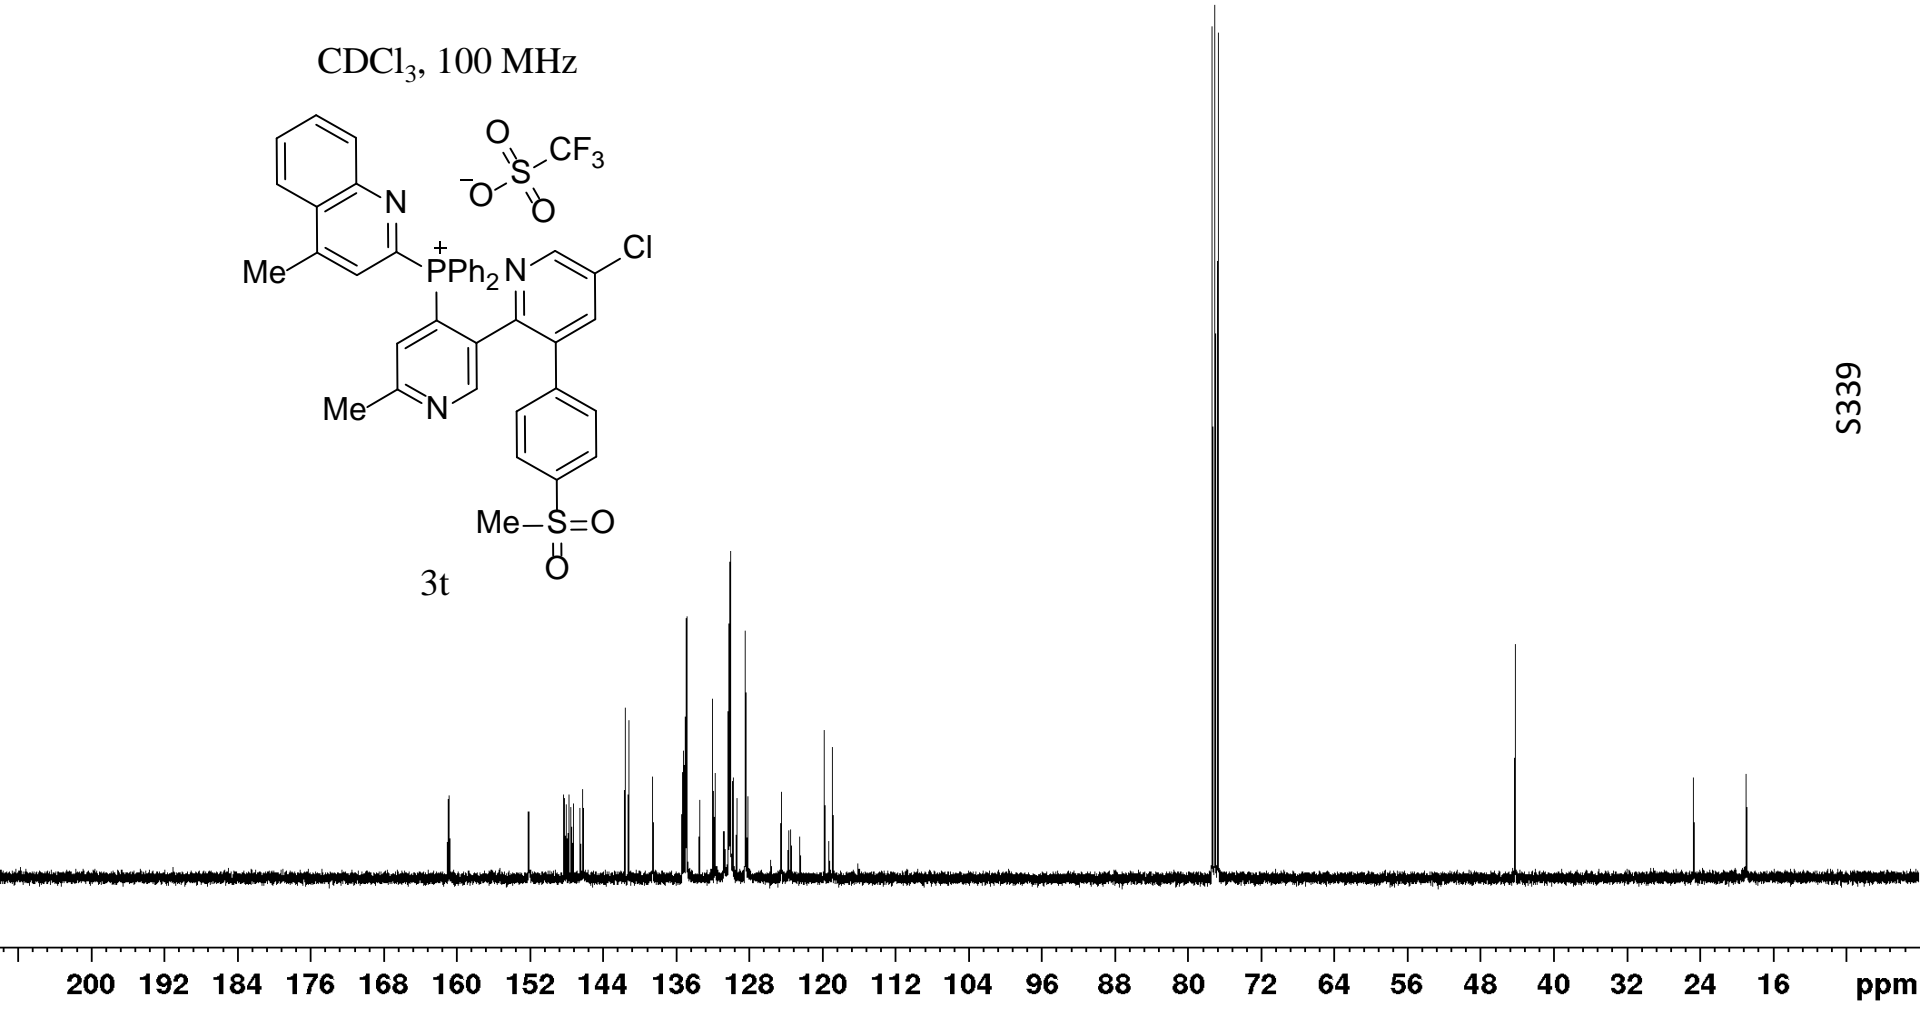

S339

— -78.15

CDCl<sub>3</sub>, 365 MHz

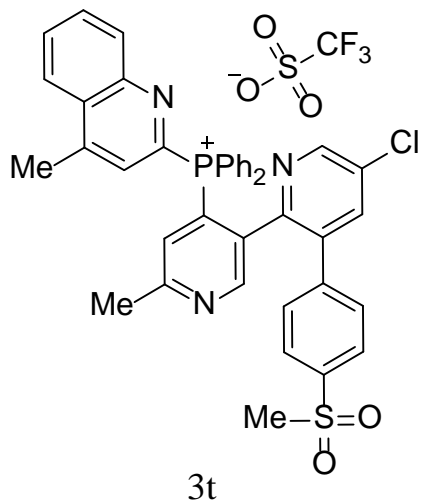

S340

10 0 -10 -20 -30 -40 -50 -60 -70 -80 -90 -100 -110 -120 -130 -140 -150 -160 -170 -180 ppm

CDCl<sub>3</sub>, 162 MHz

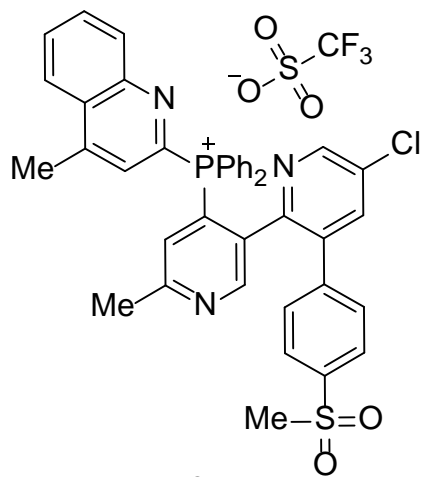

3t

— 16.31

S341

140 130 120 110 100 90 80 70 60 50 40 30 20 10 0 -10 -20 -30 ppm

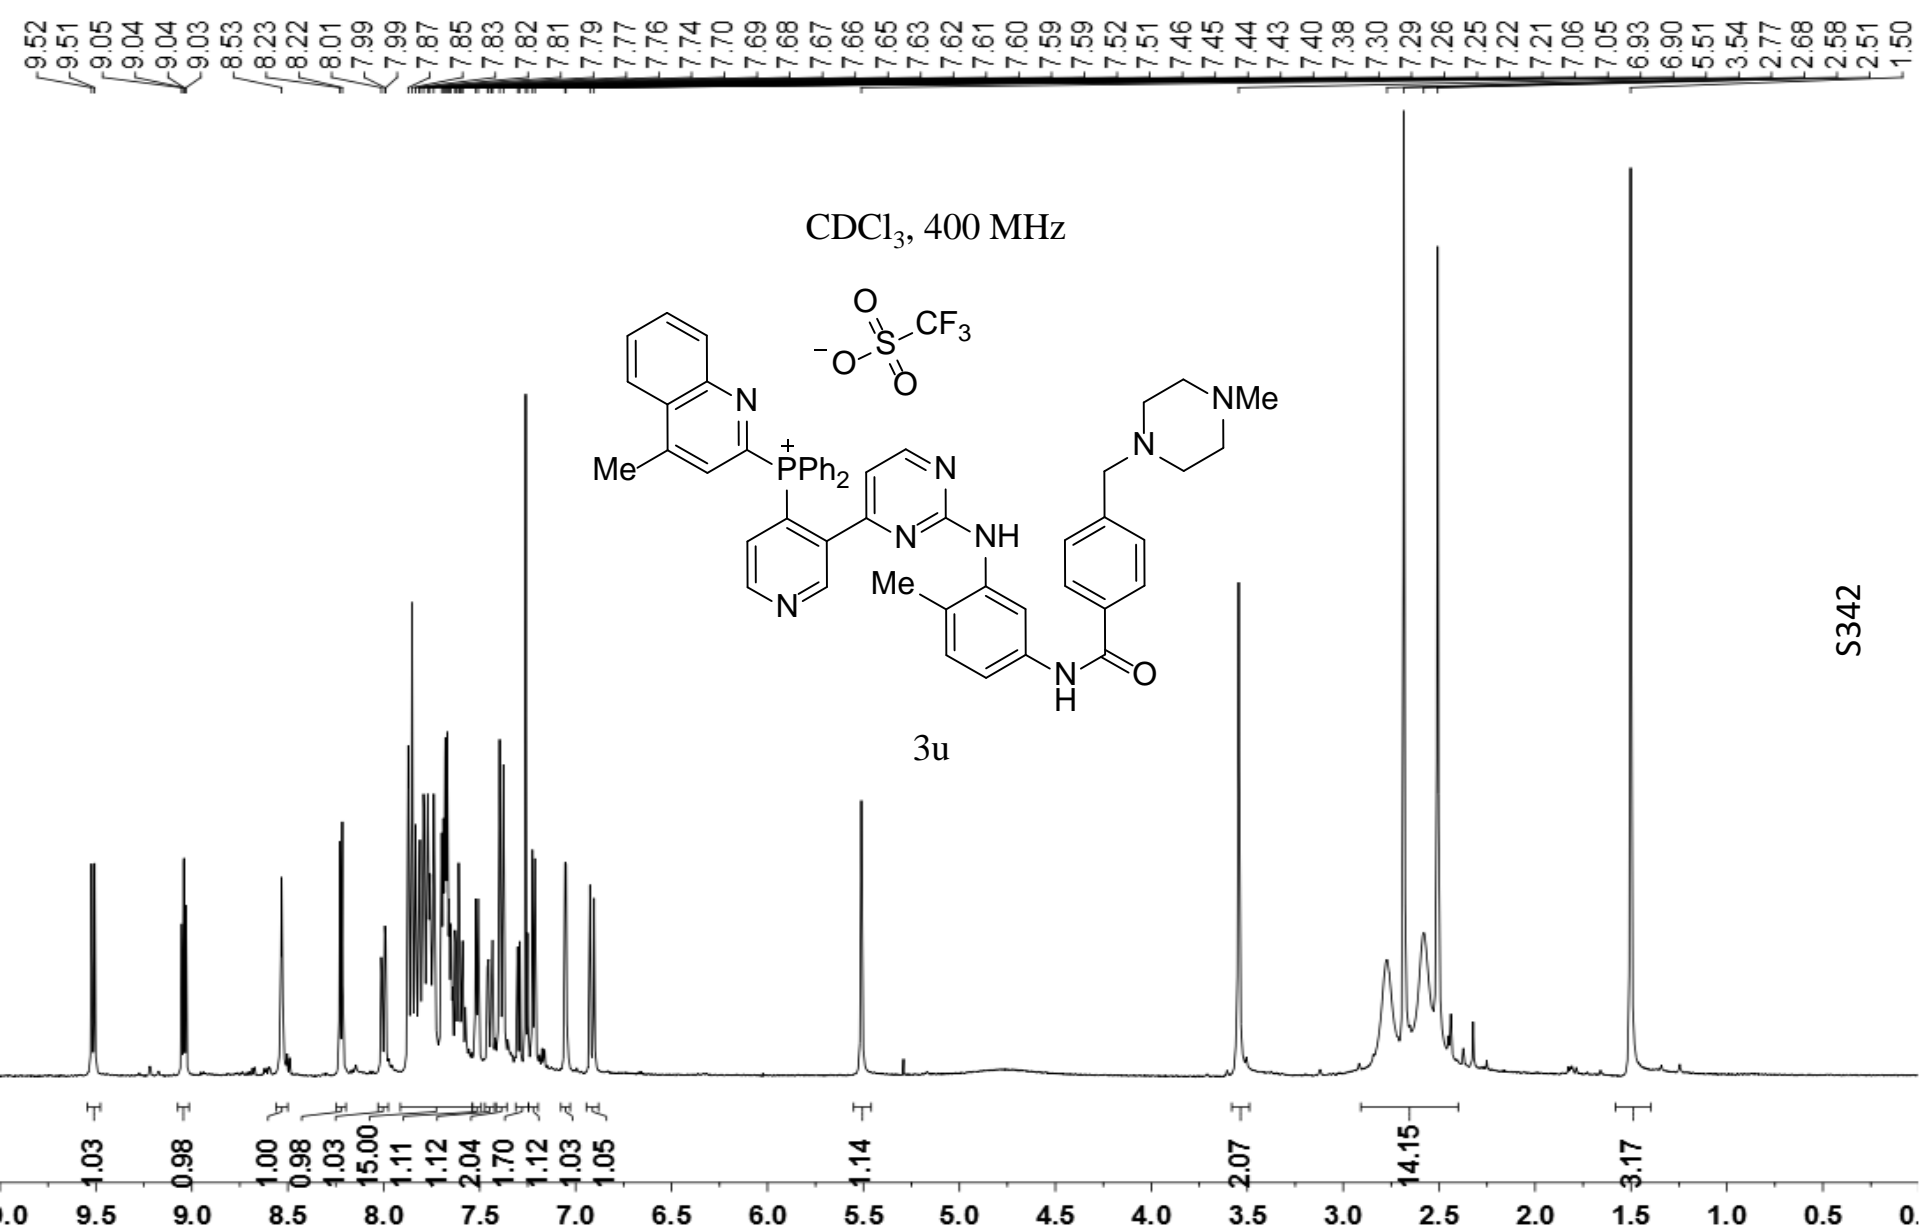

S342

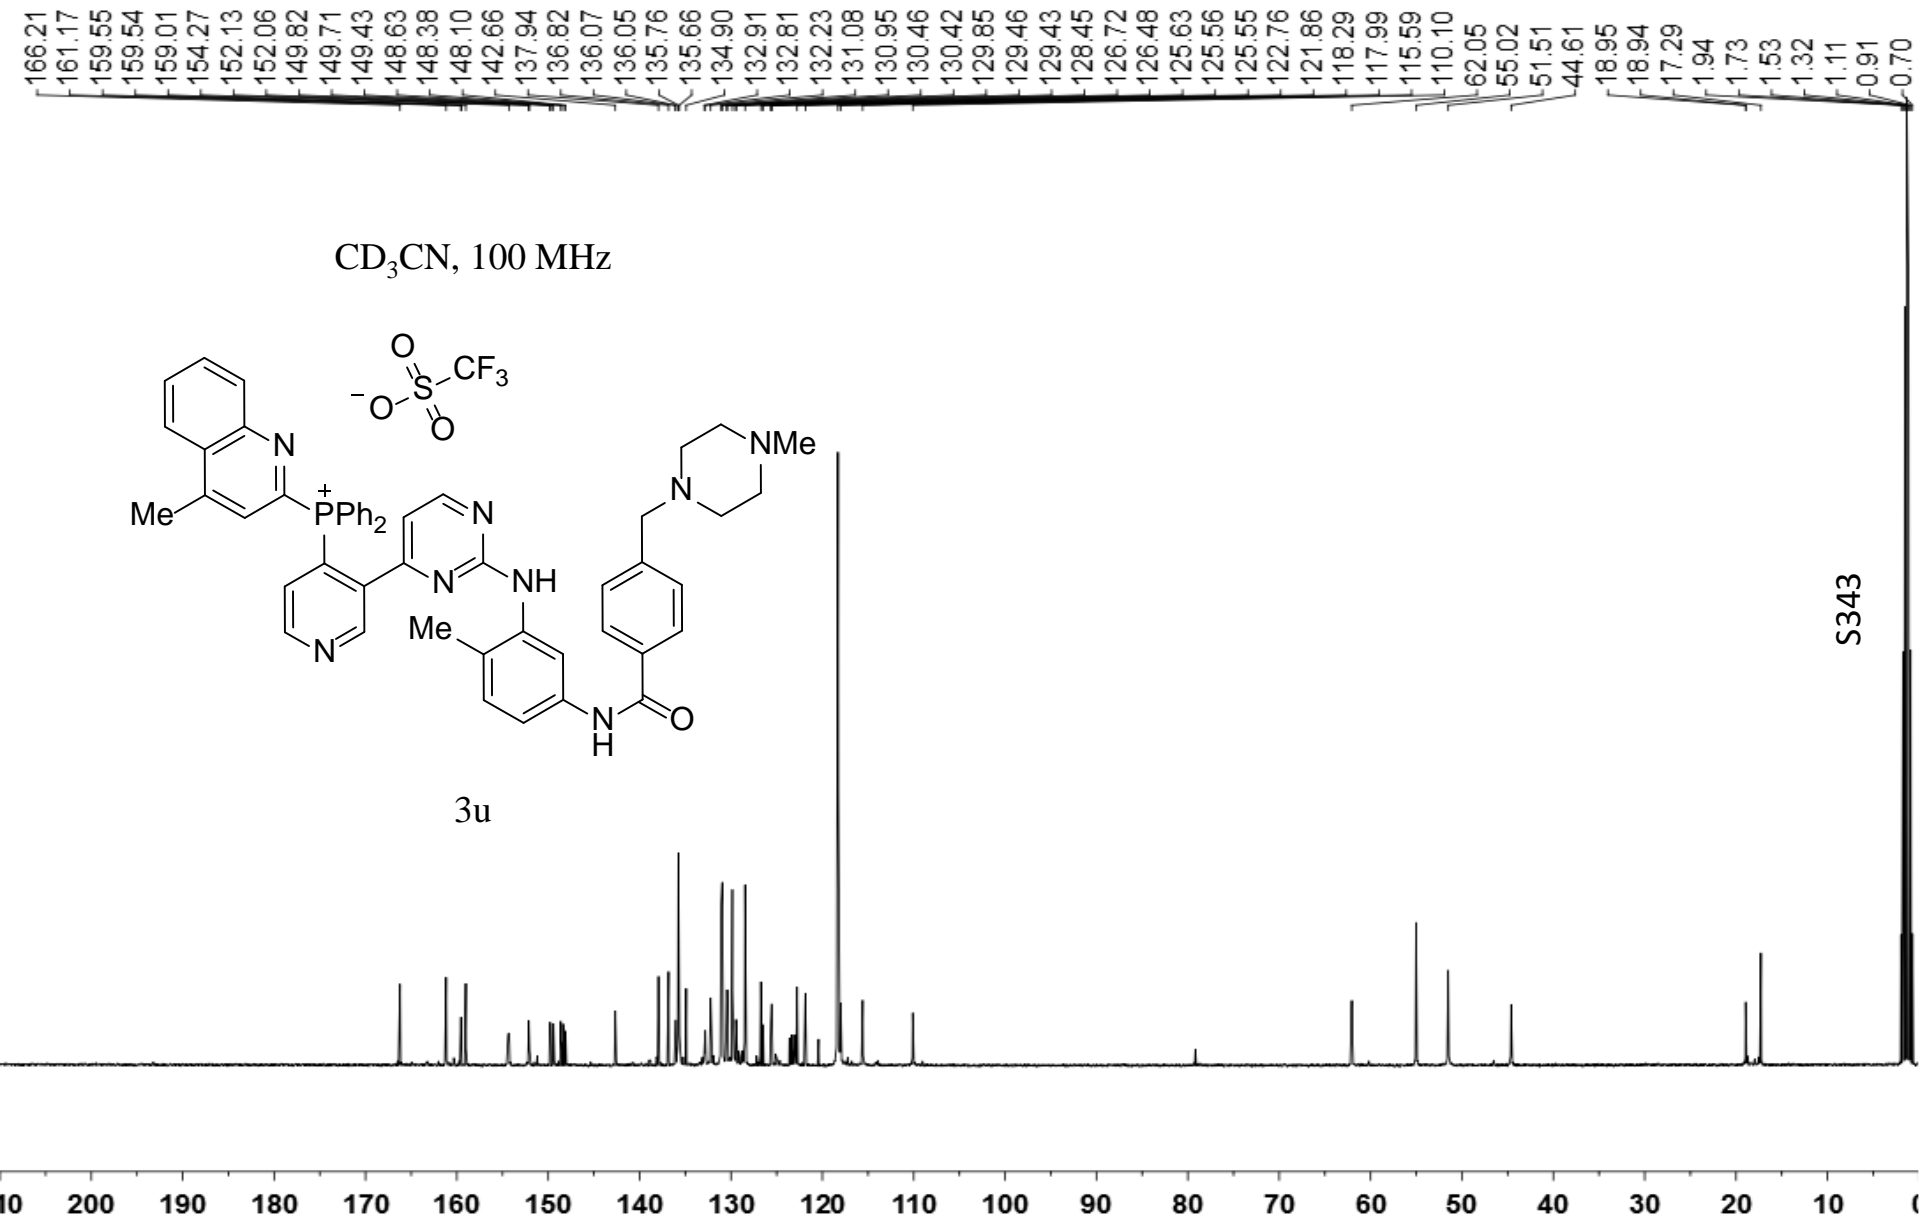

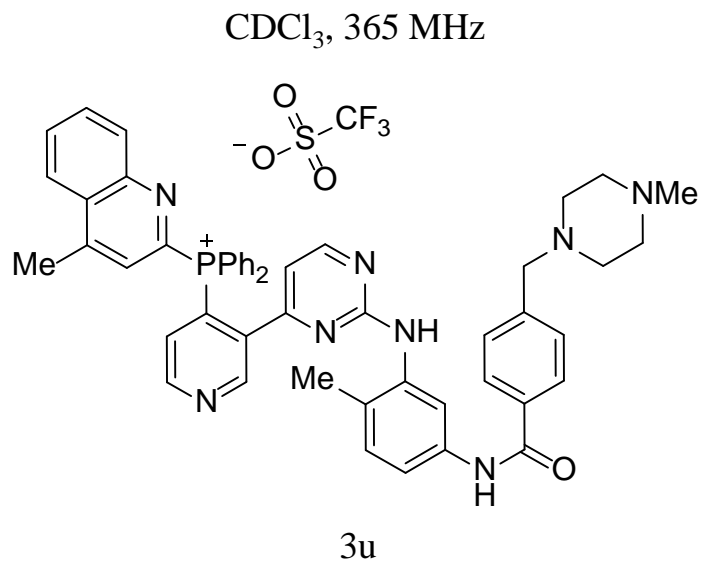

78.13

0 10 0 -10 -20 -30 -40 -50 -60 -70 -80 -90 -110 -130 -150 -170 -190

S344



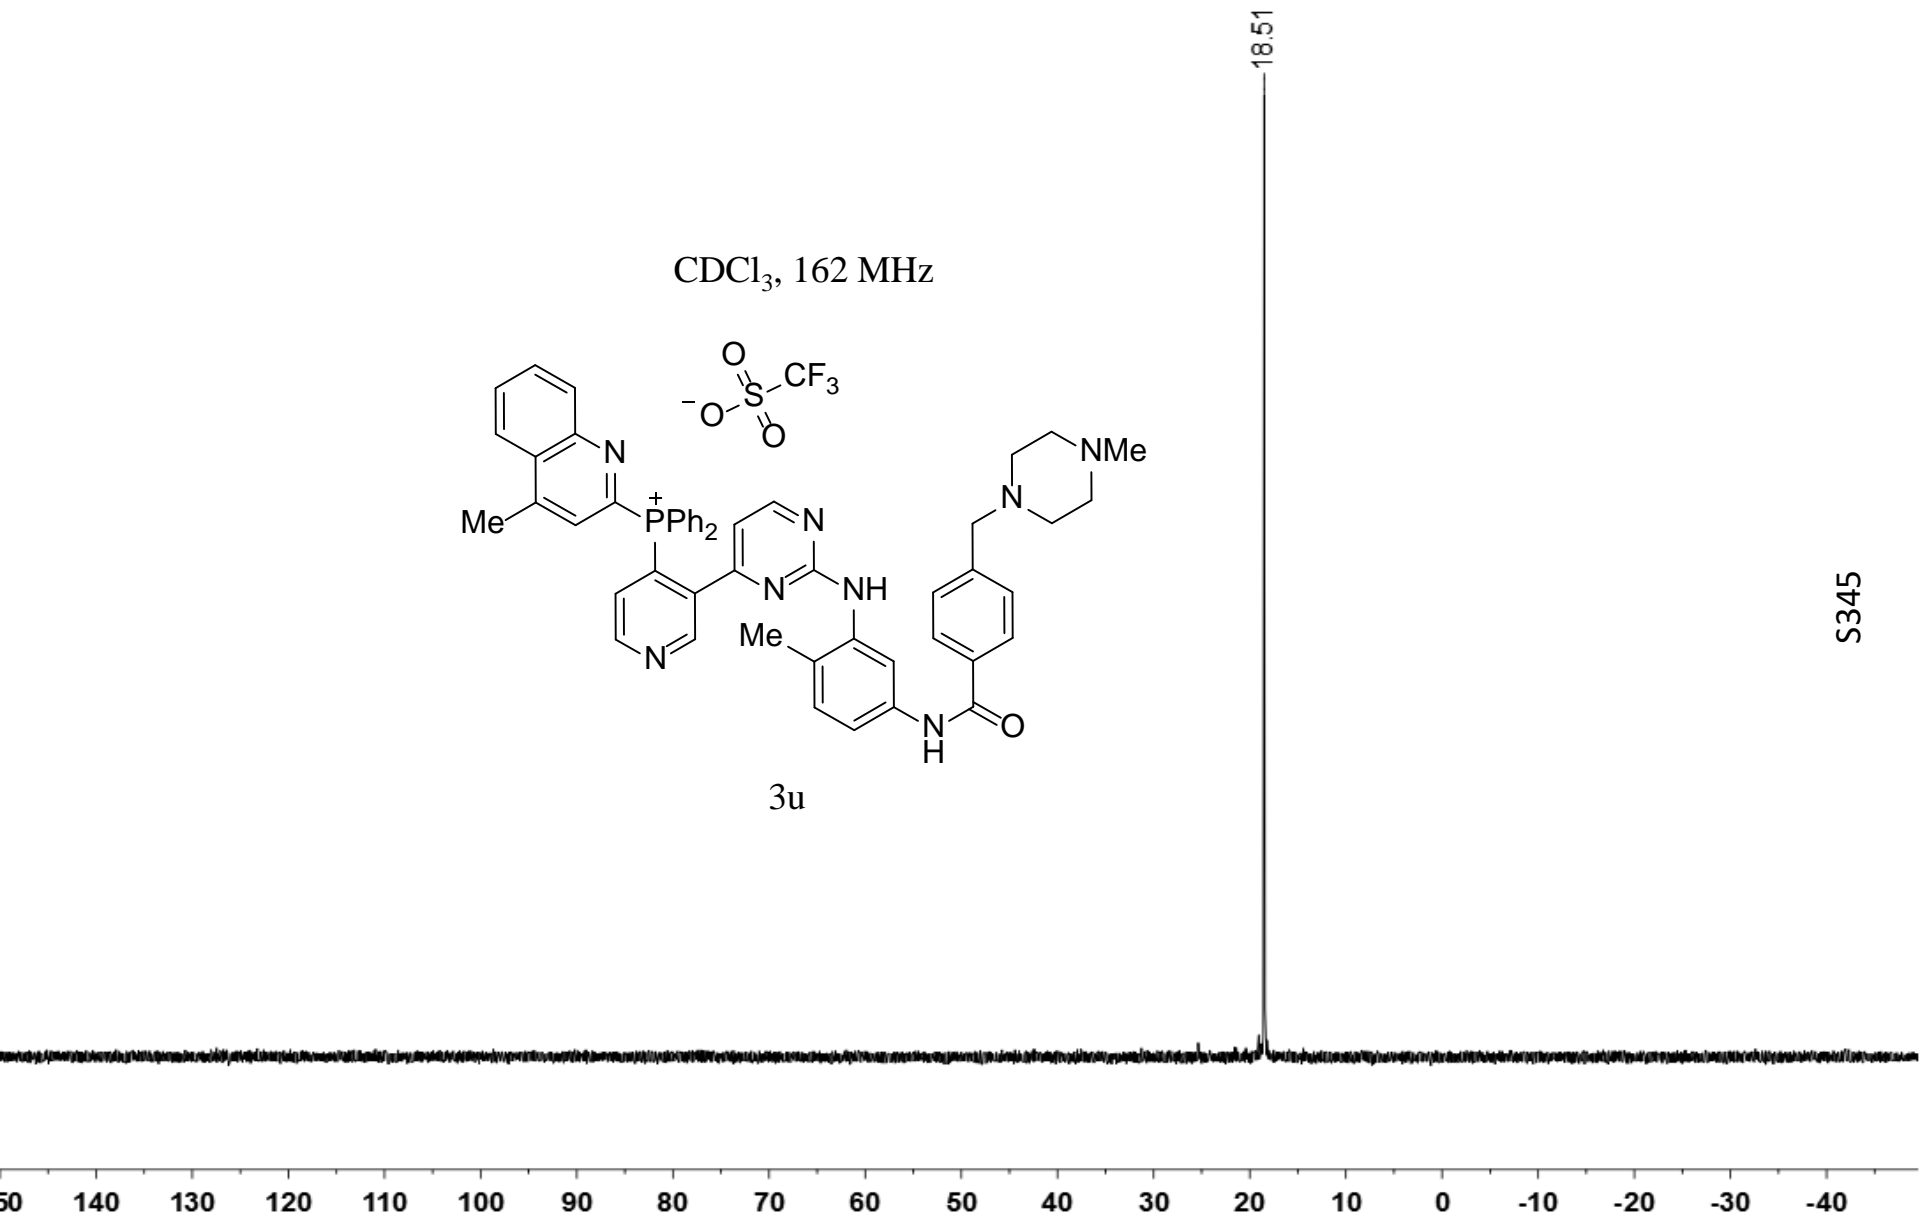

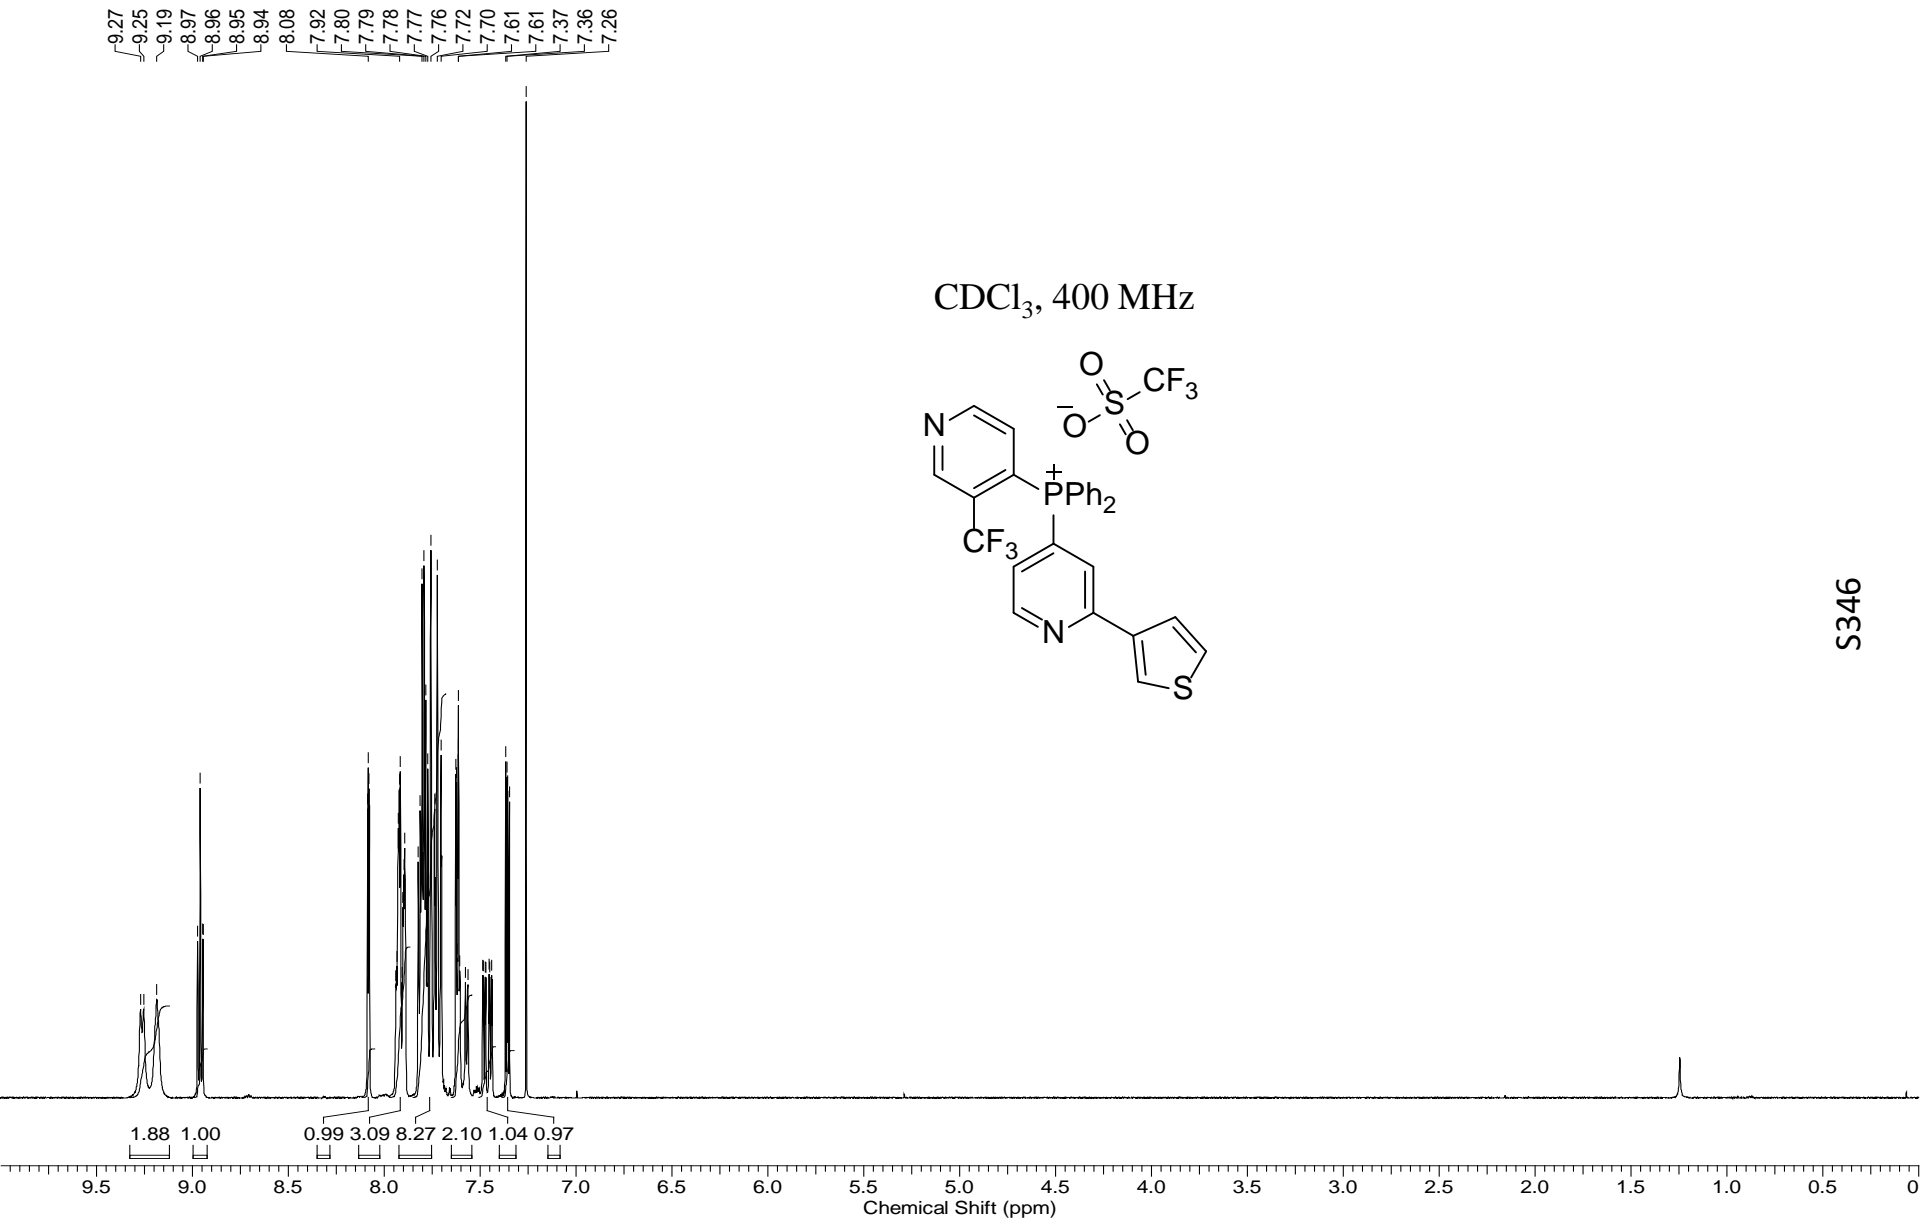

S346

CDCl<sub>3</sub>, 100 MHz

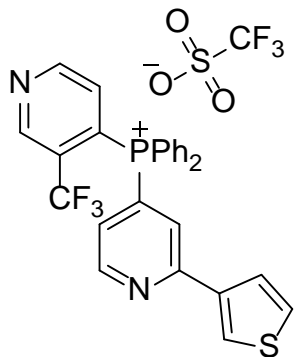

156.34  
156.24  
155.42  
151.64  
151.52  
139.69  
136.49  
136.46  
134.83  
134.72  
131.58  
131.07  
130.94  
127.16  
126.94  
126.10  
124.29  
123.20  
123.11  
119.01  
115.25  
114.36  
77.32  
77.20  
77.00  
76.68

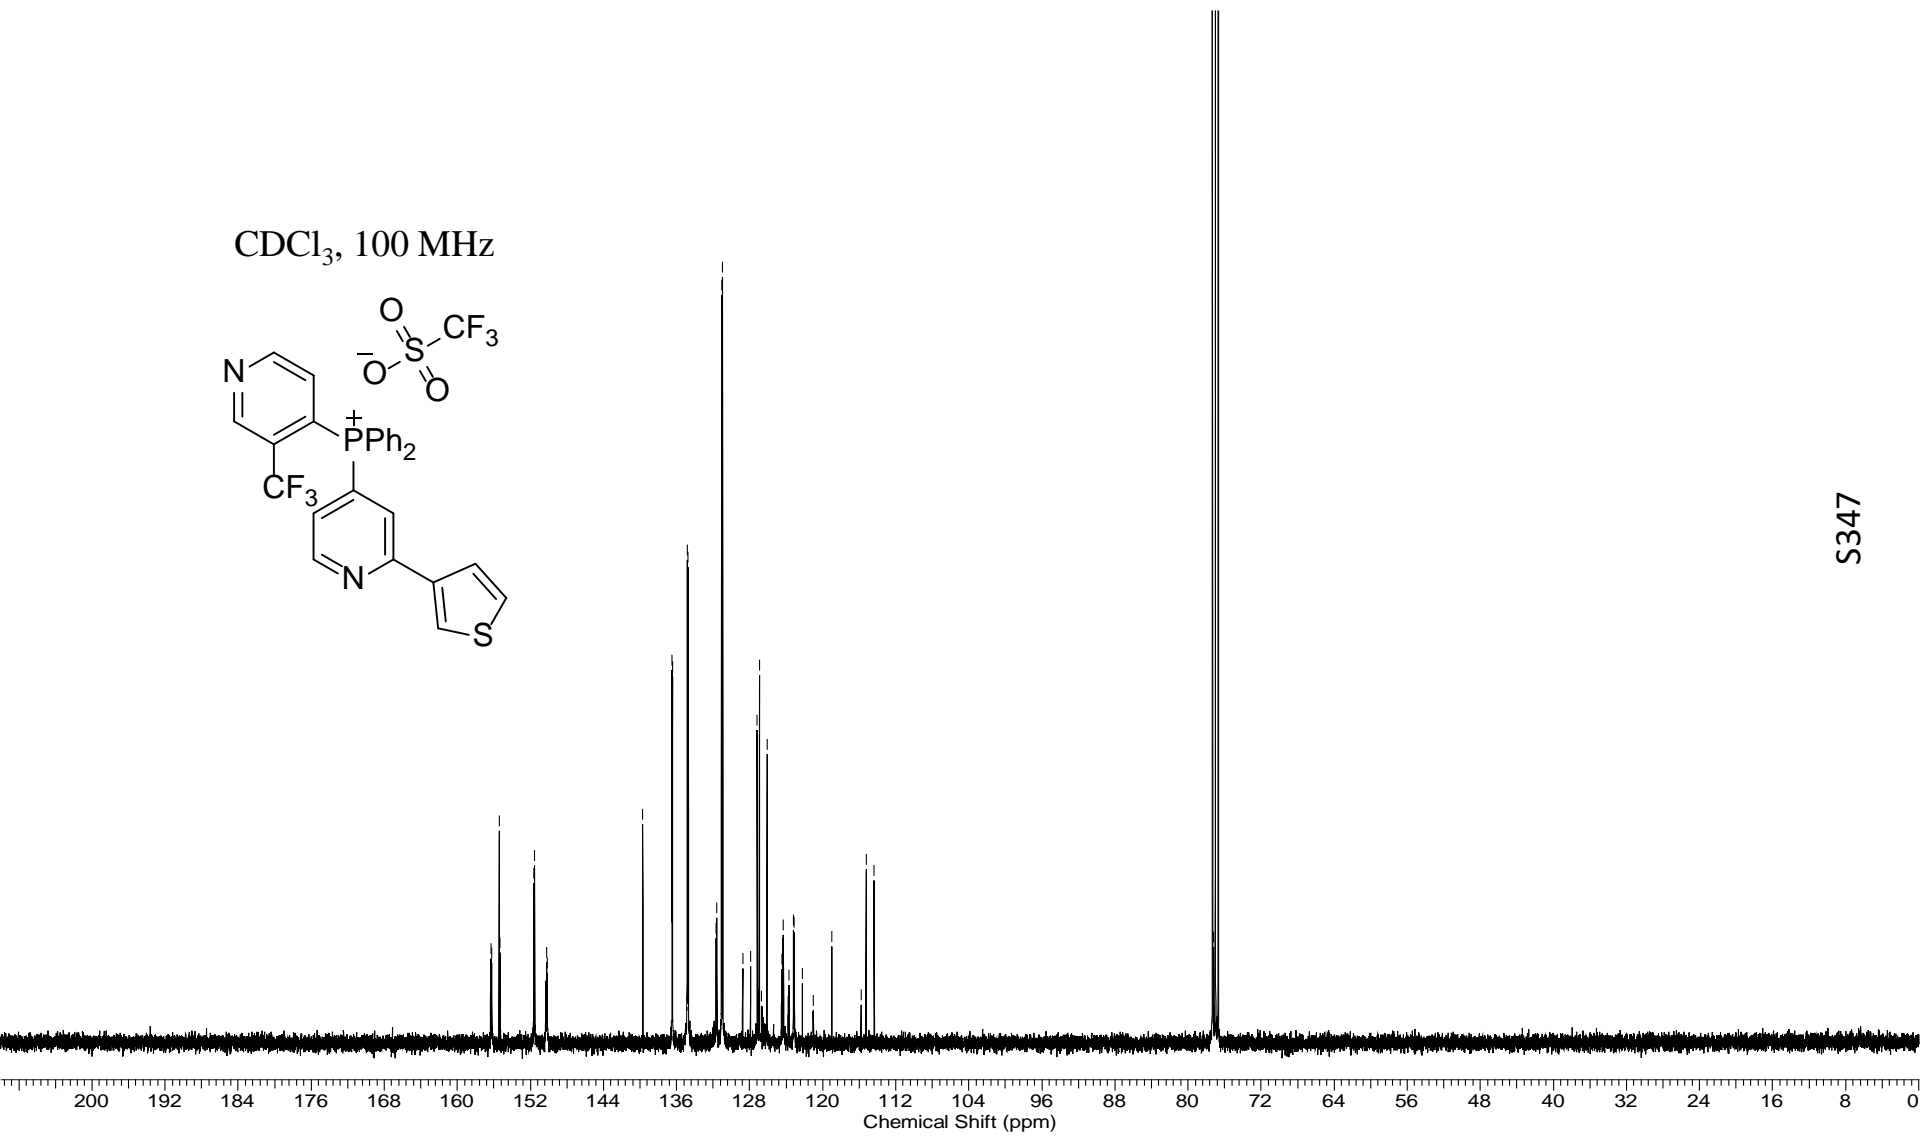

CDCl<sub>3</sub>, 365 MHz

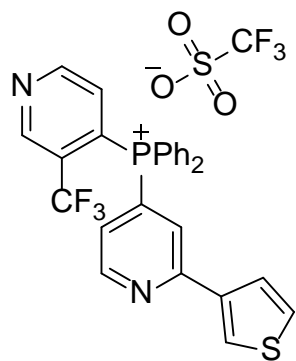

-53.69

-78.30

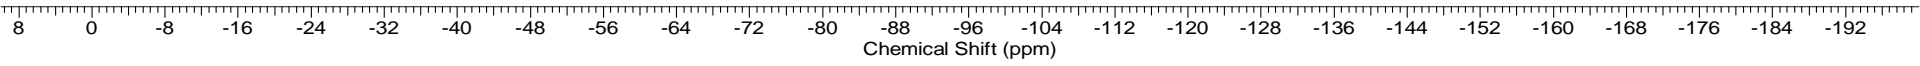

CDCl<sub>3</sub>, 162 MHz

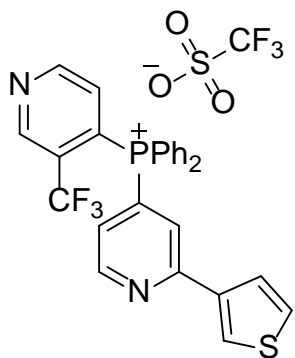

-26.91

S349

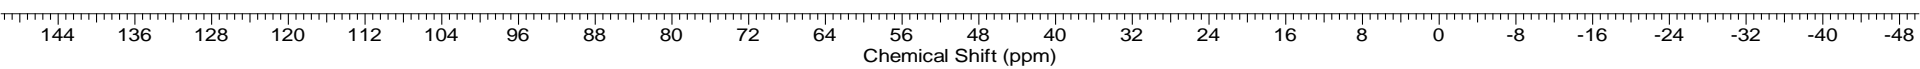

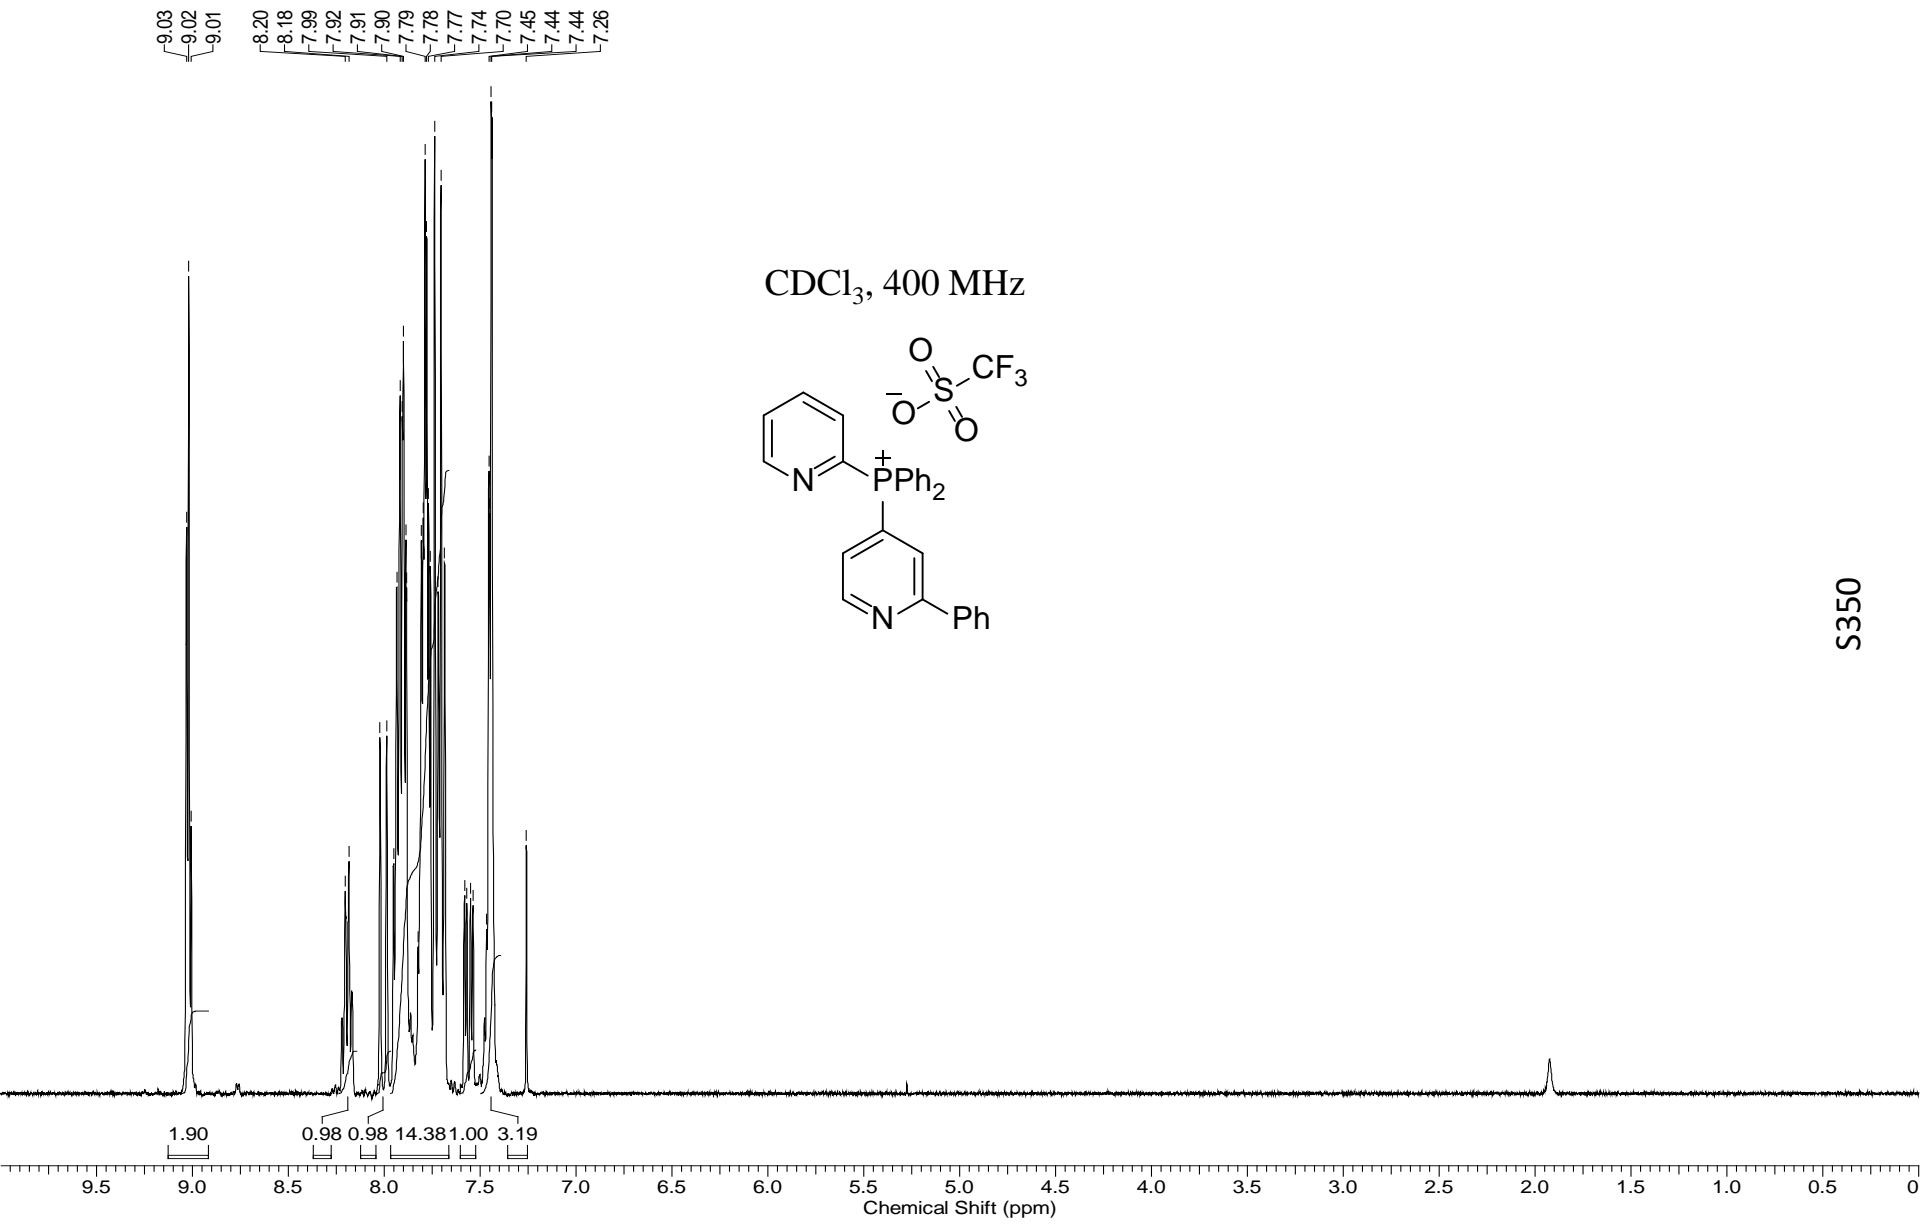

CDCl<sub>3</sub>, 400 MHz

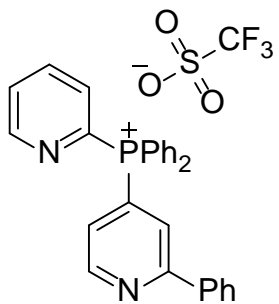

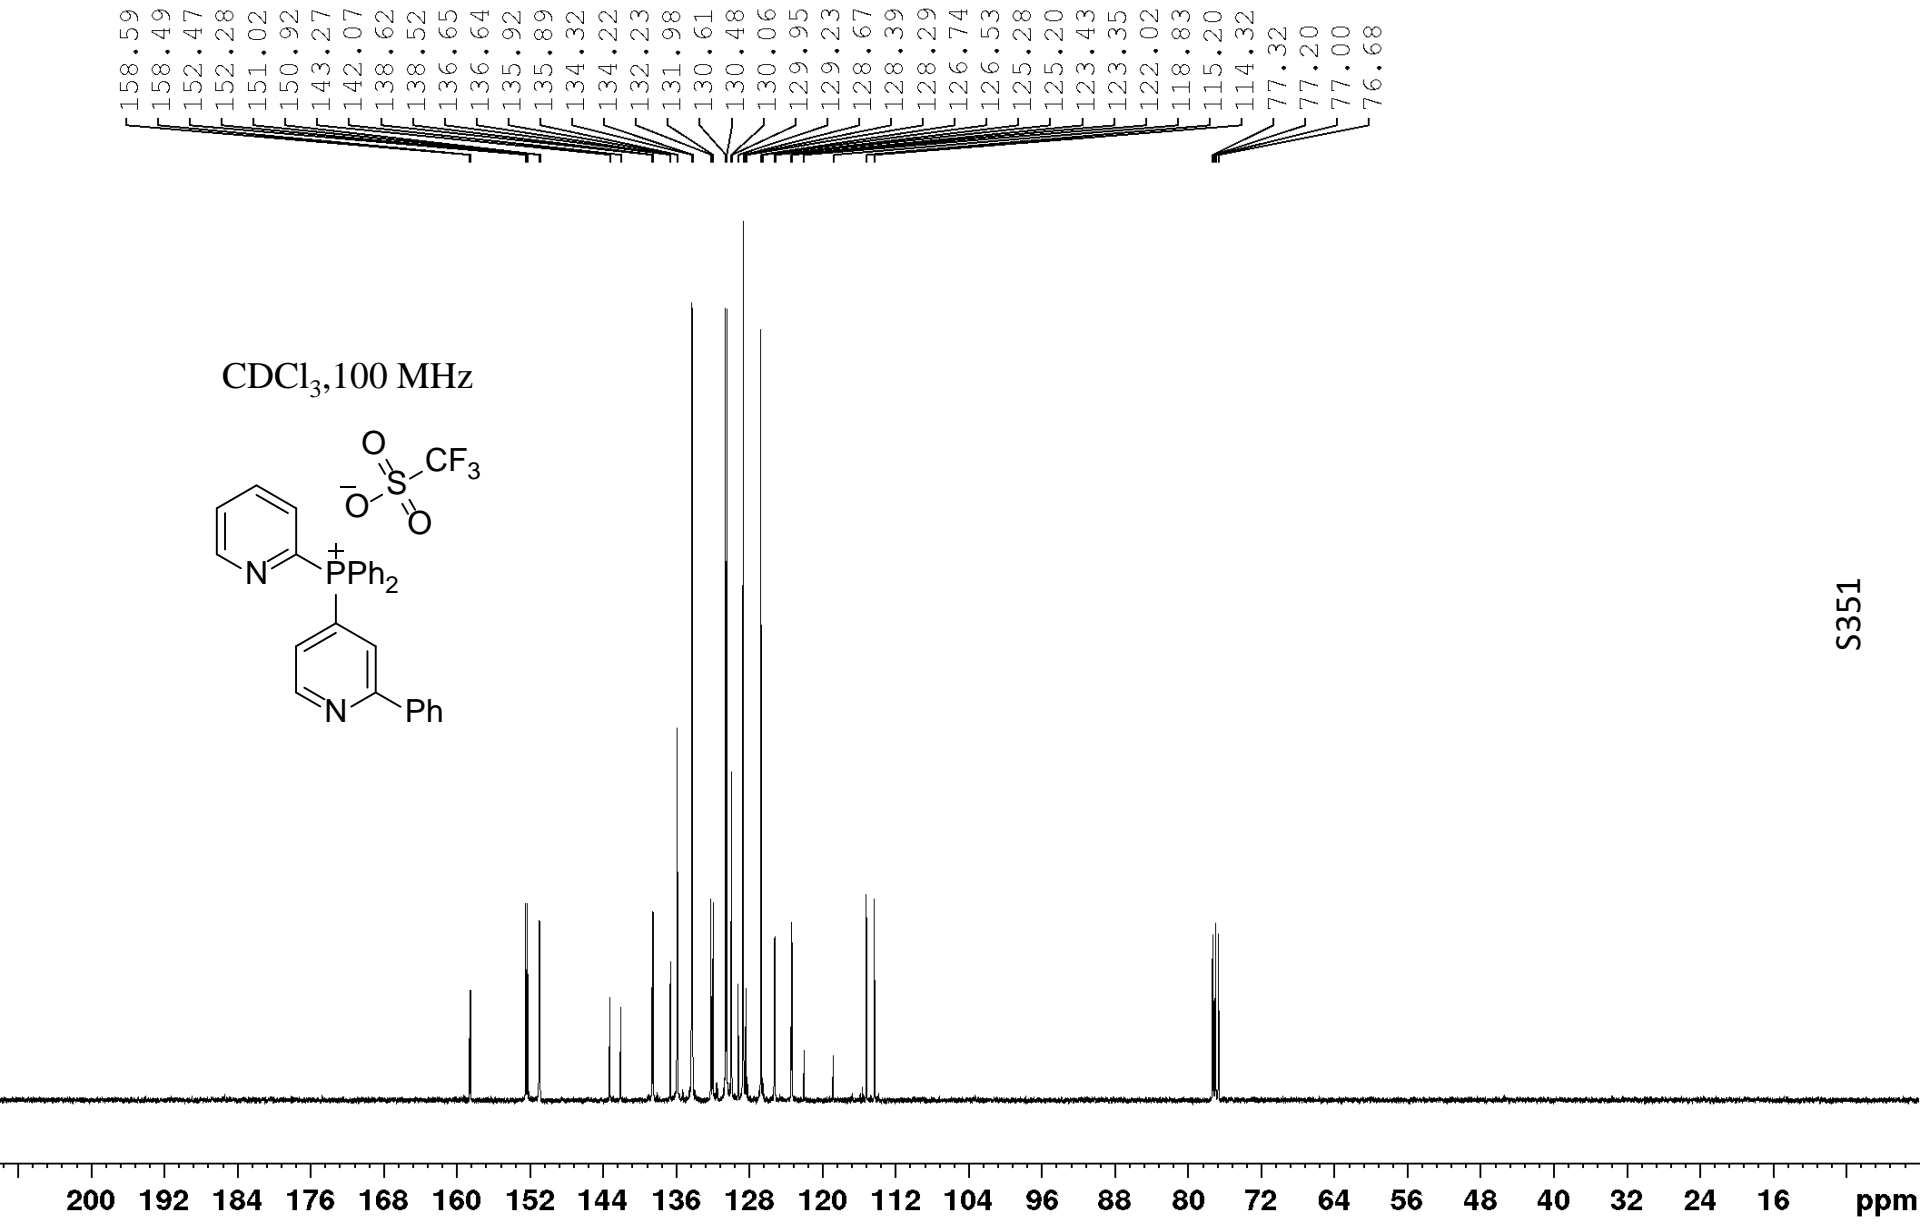

S351

CDCl<sub>3</sub>, 365 MHz

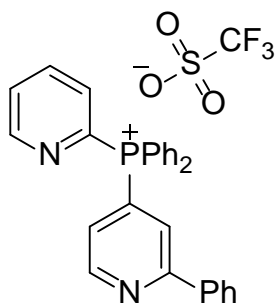

— -78.16

0 -10 -20 -30 -40 -50 -60 -70 -80 -90 -100 -110 -120 -130 -140 -150 -160 -170 -180 ppm

S352



CDCl<sub>3</sub>, 162 MHz

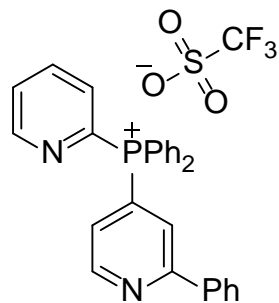

—13.94

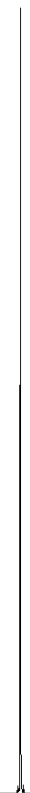

S353

140 130 120 110 100 90 80 70 60 50 40 30 20 10 0 -10 -20 -30 ppm

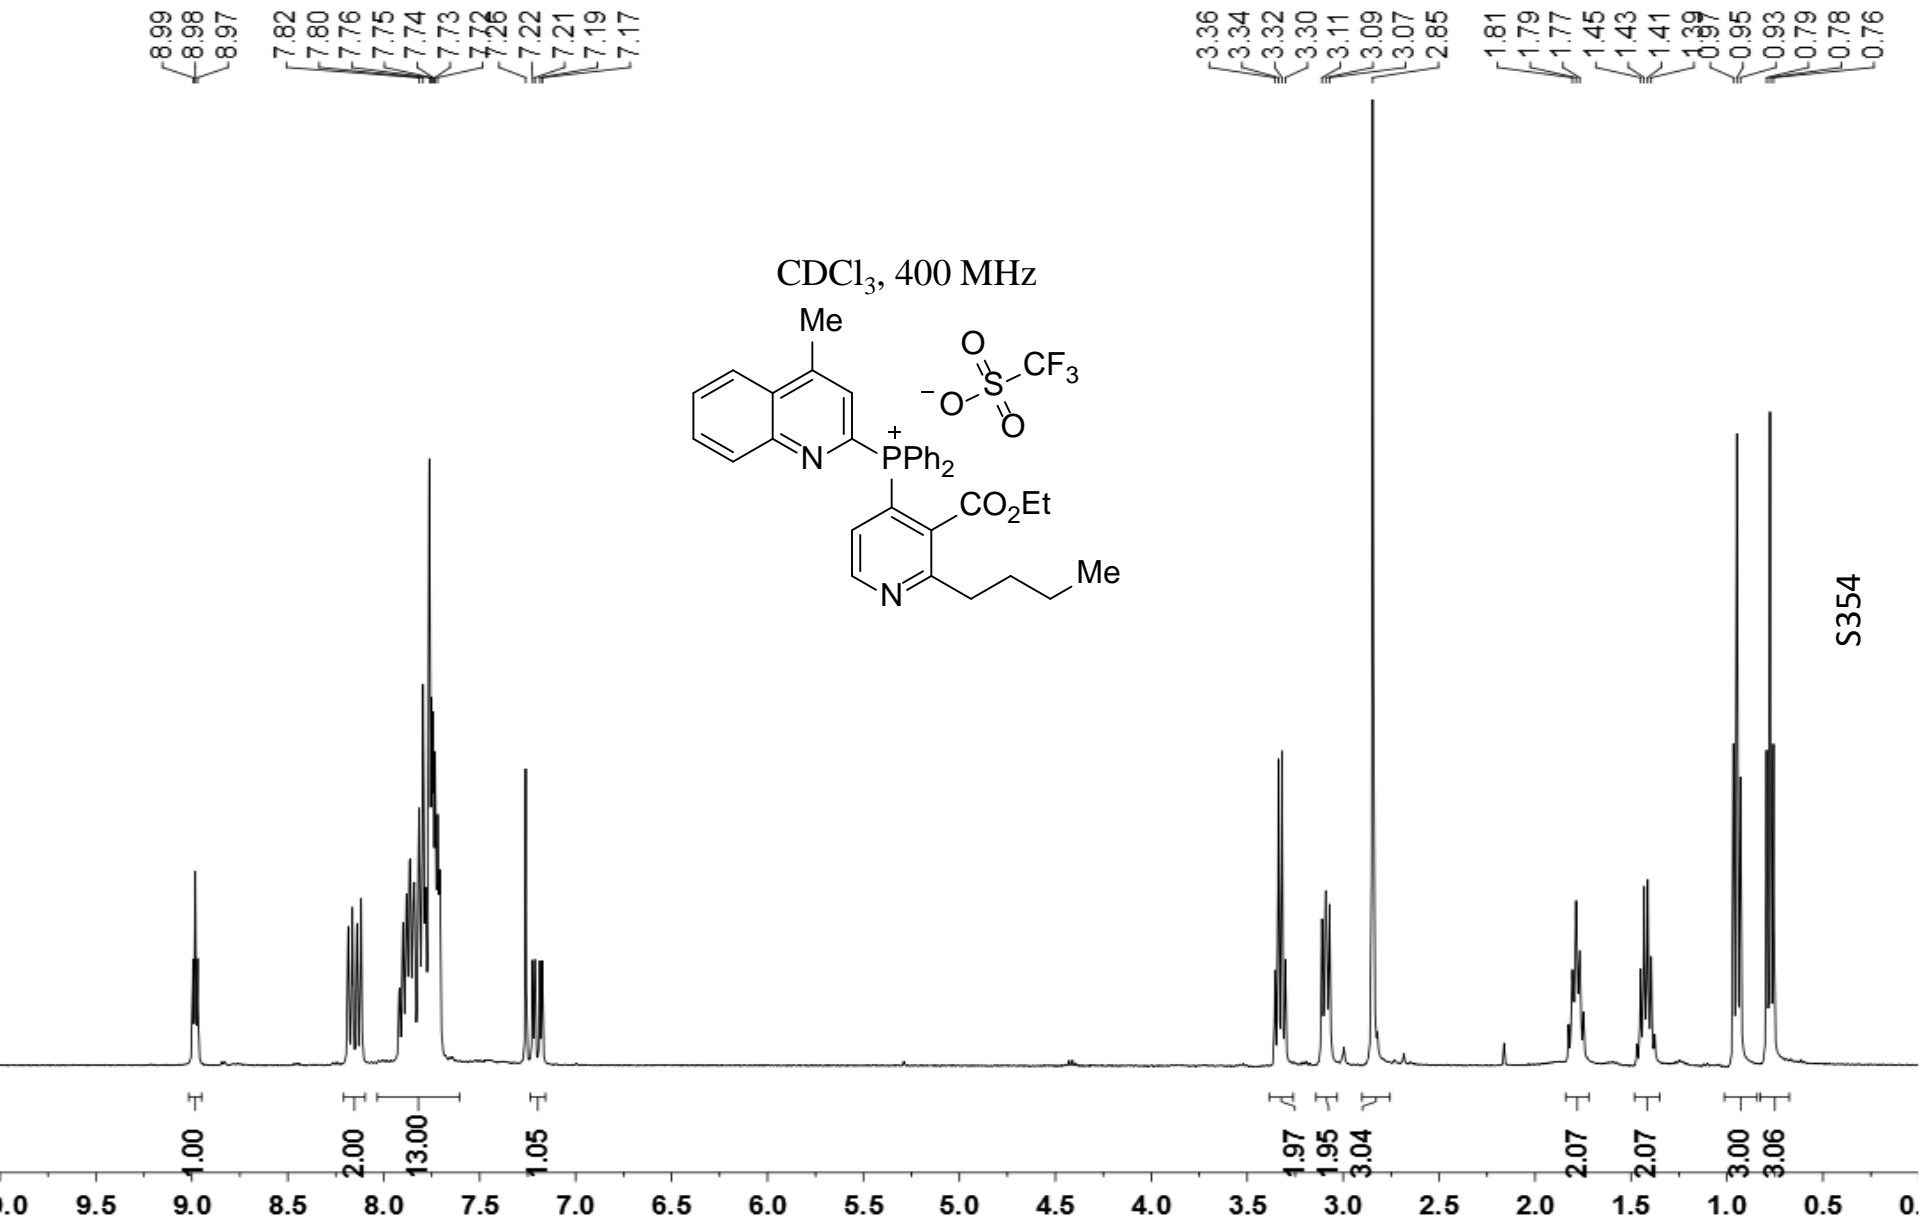

S354

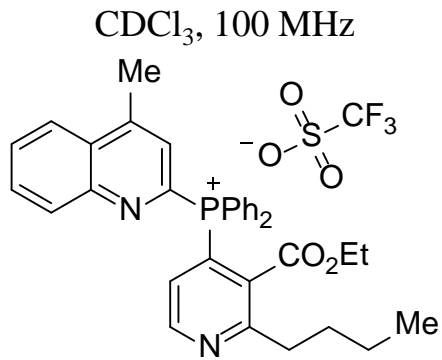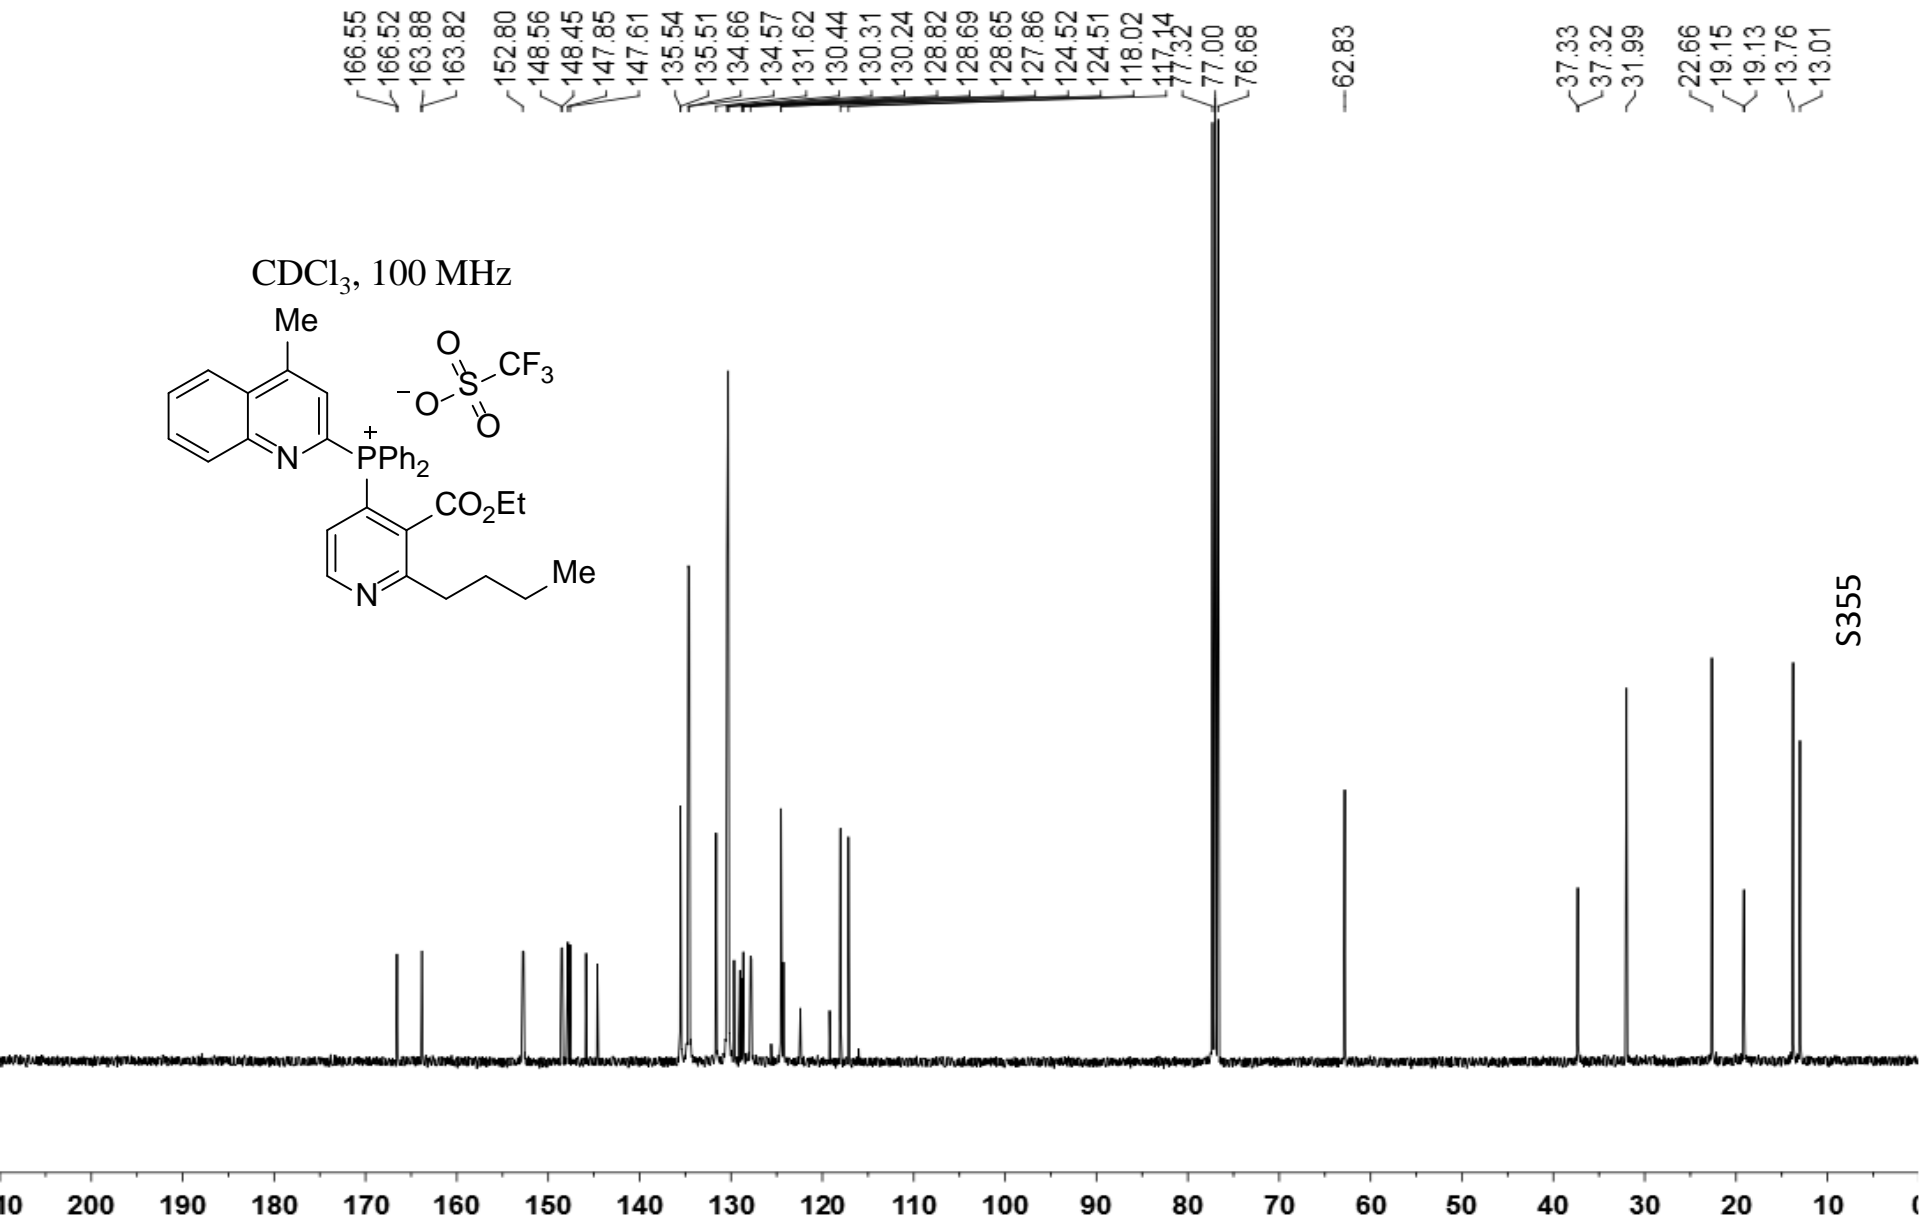

S355

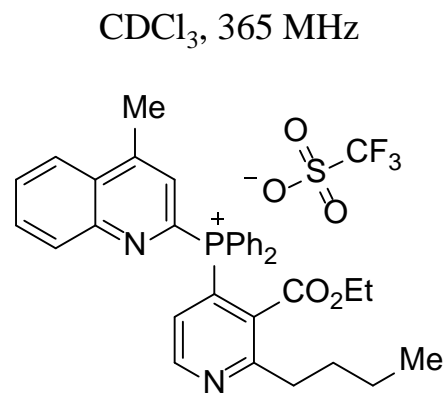

78.15

0 10 0 -10 -20 -30 -40 -50 -60 -70 -80 -90 -110 -130 -150 -170 -190

S356

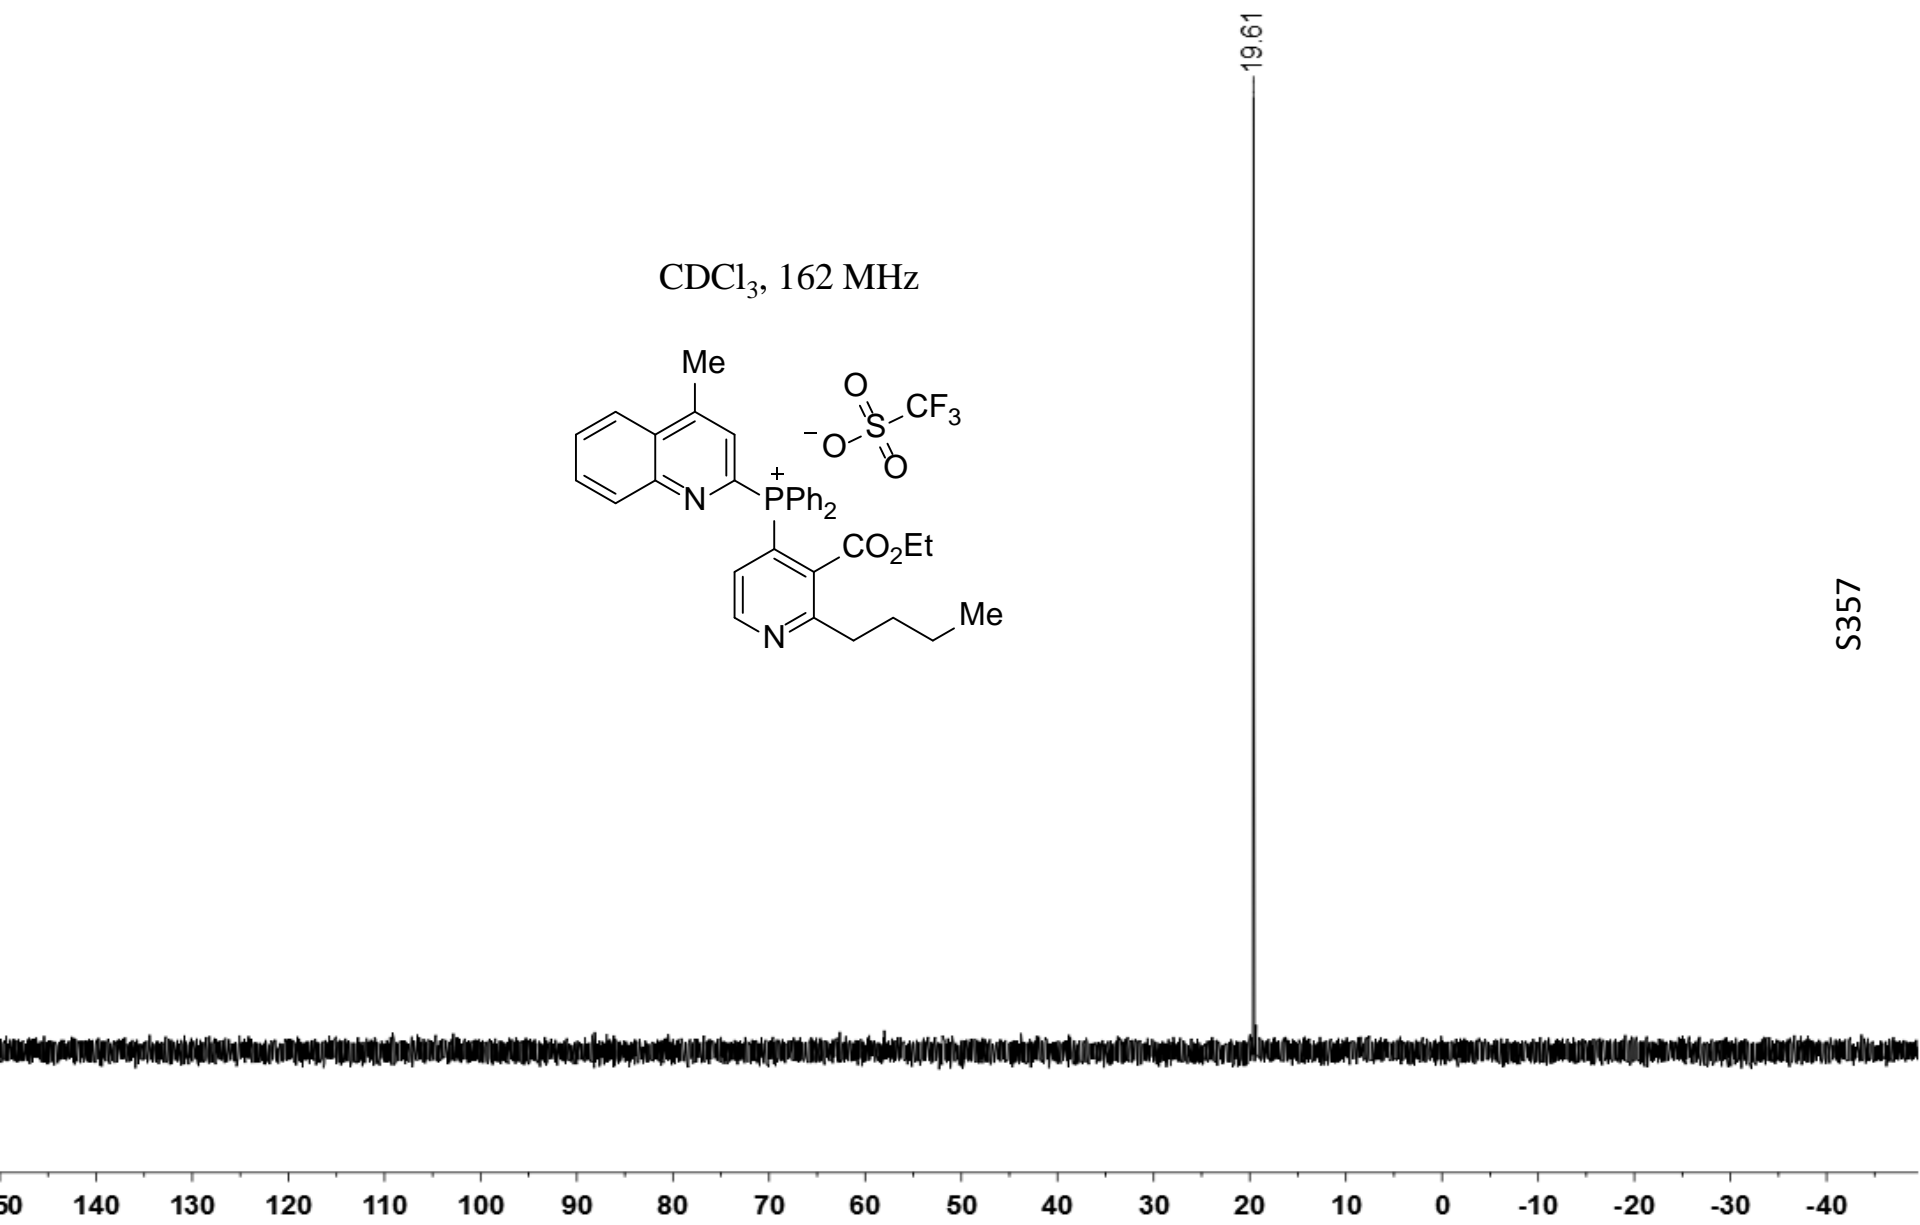

S357

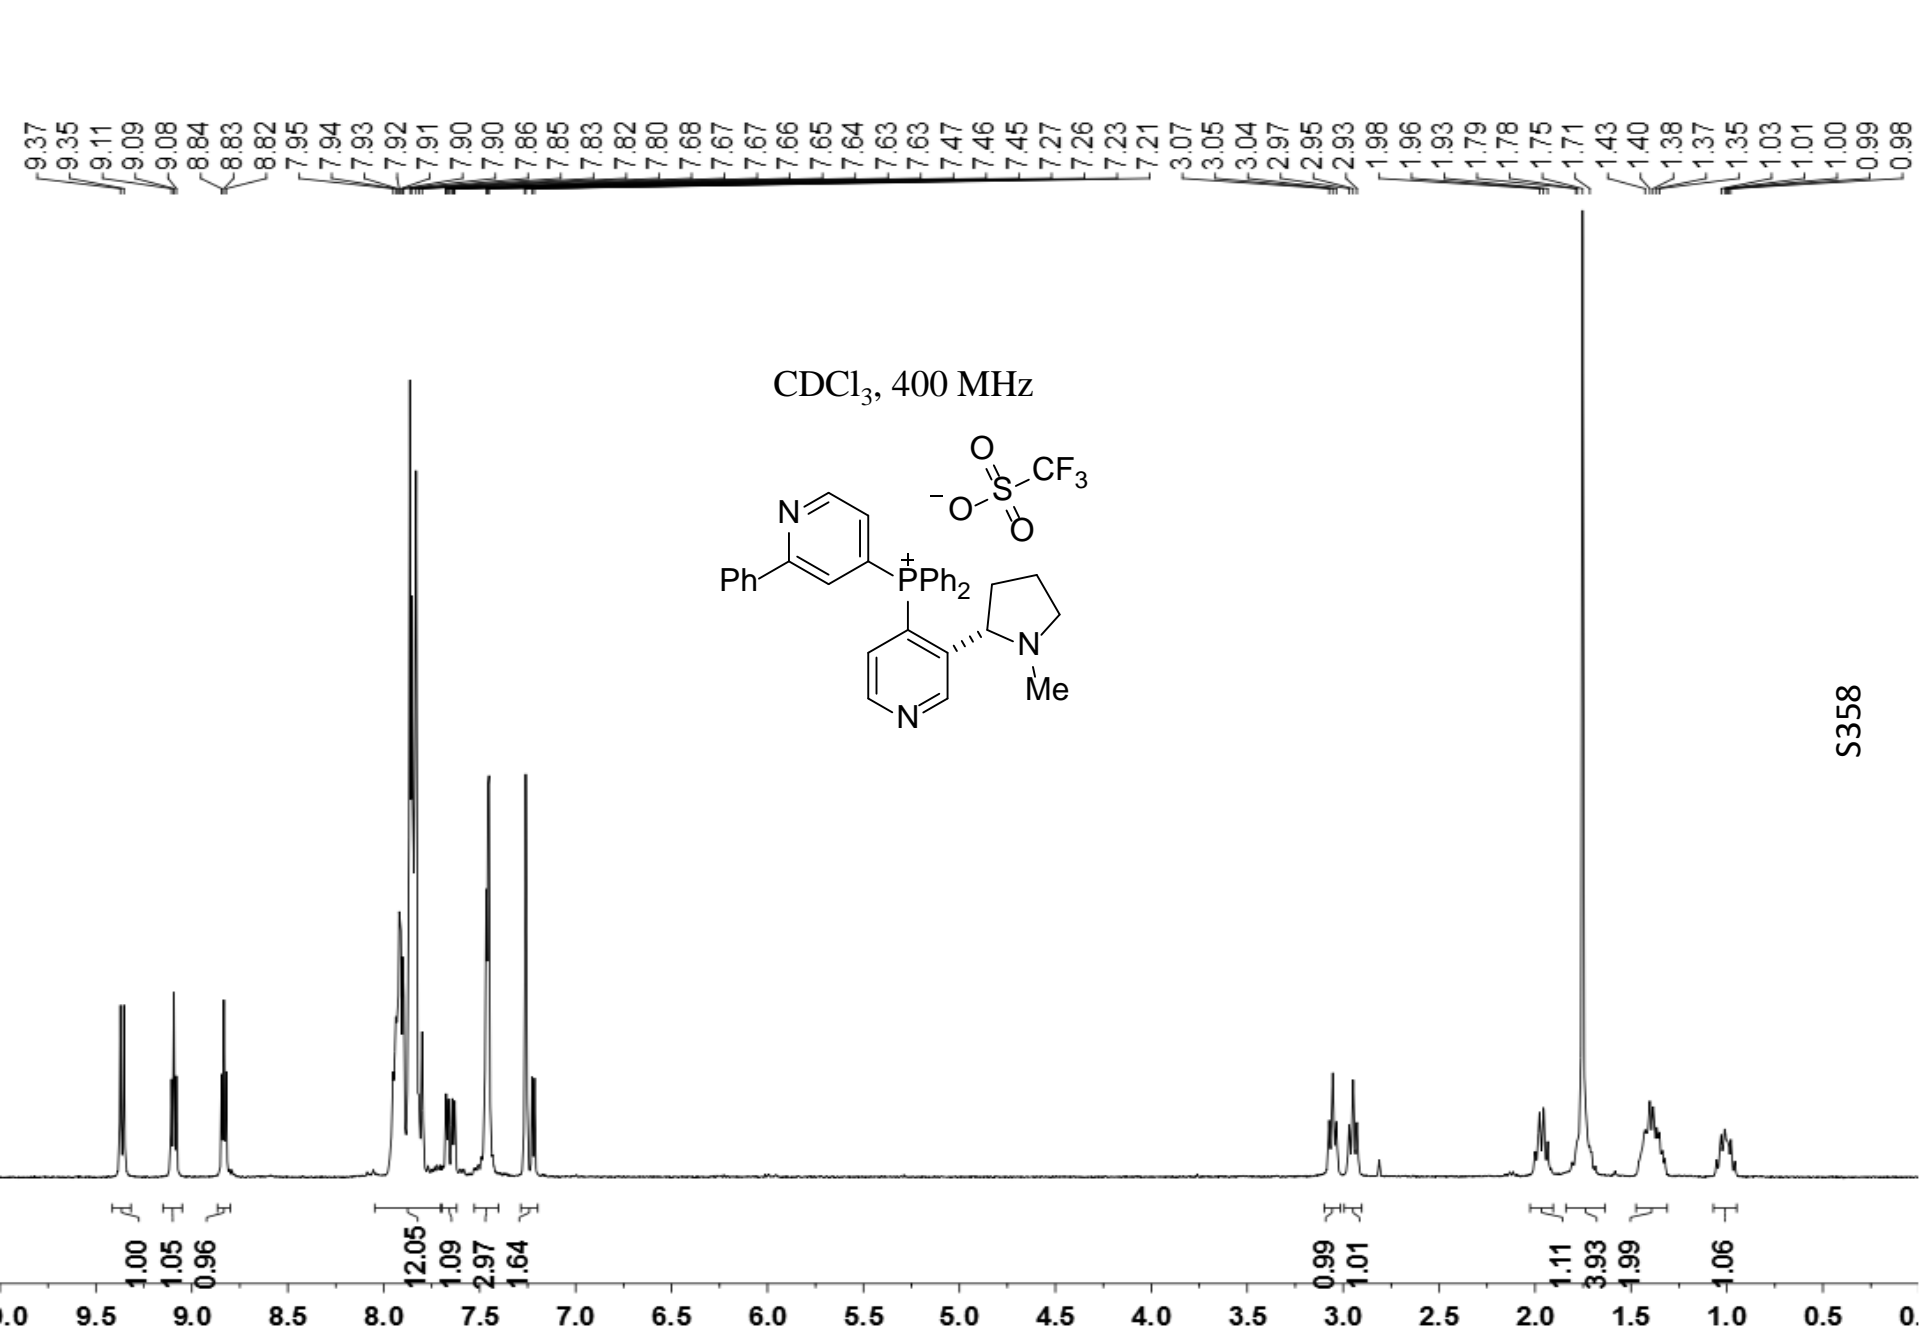

S358

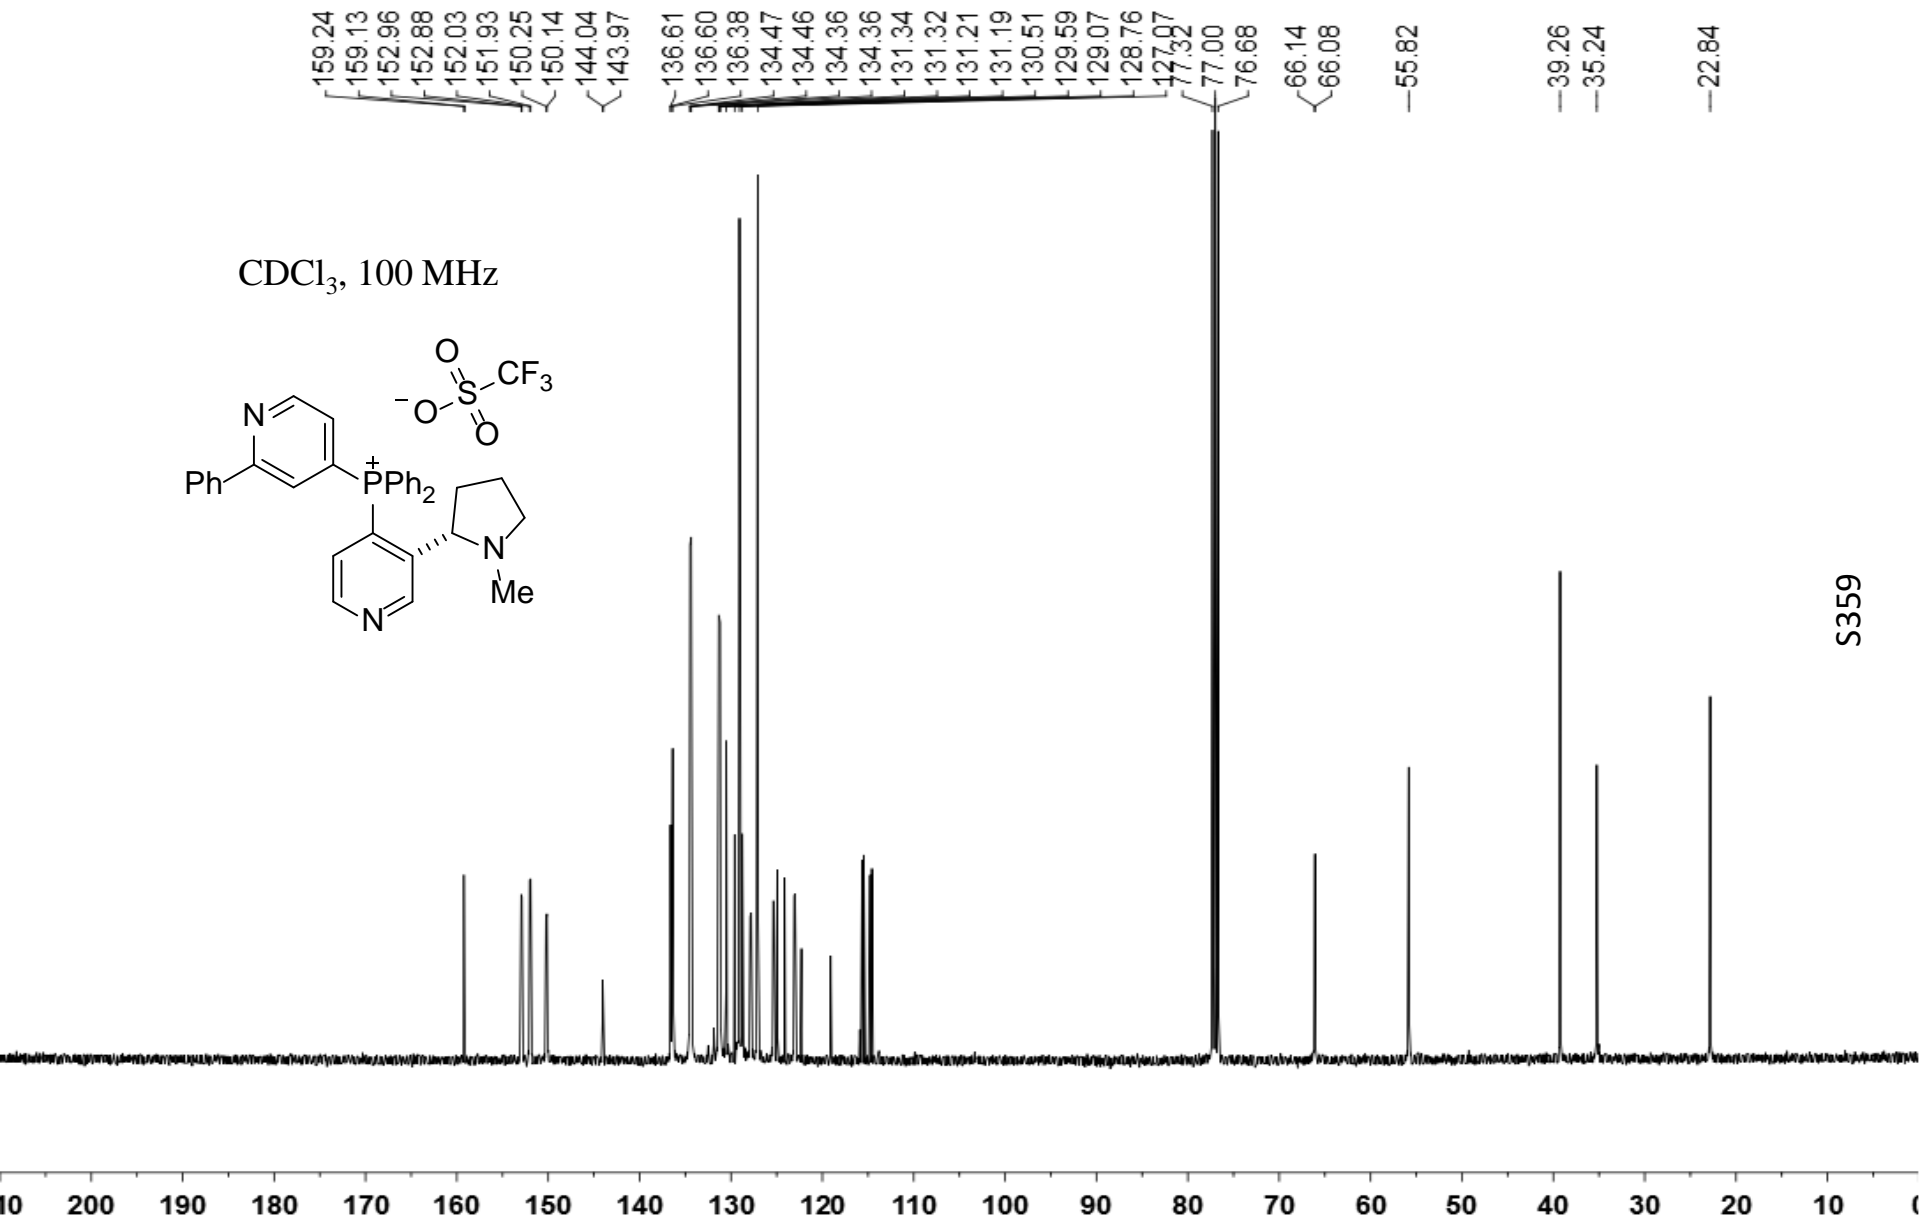

S359

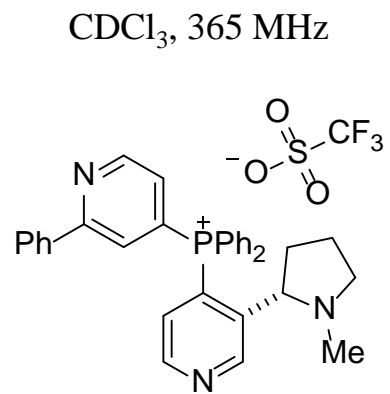

78.13

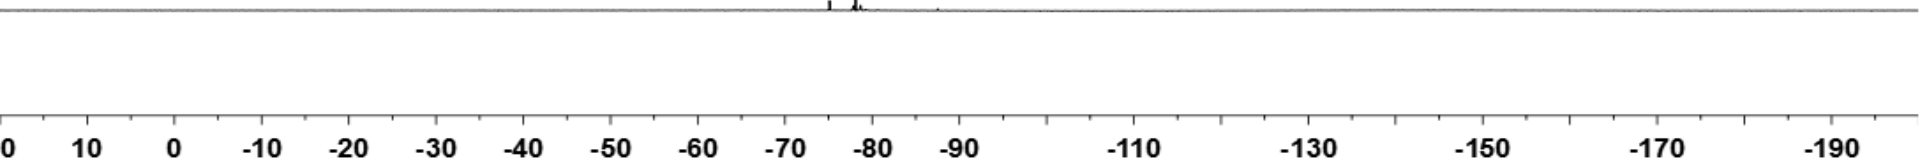

S360



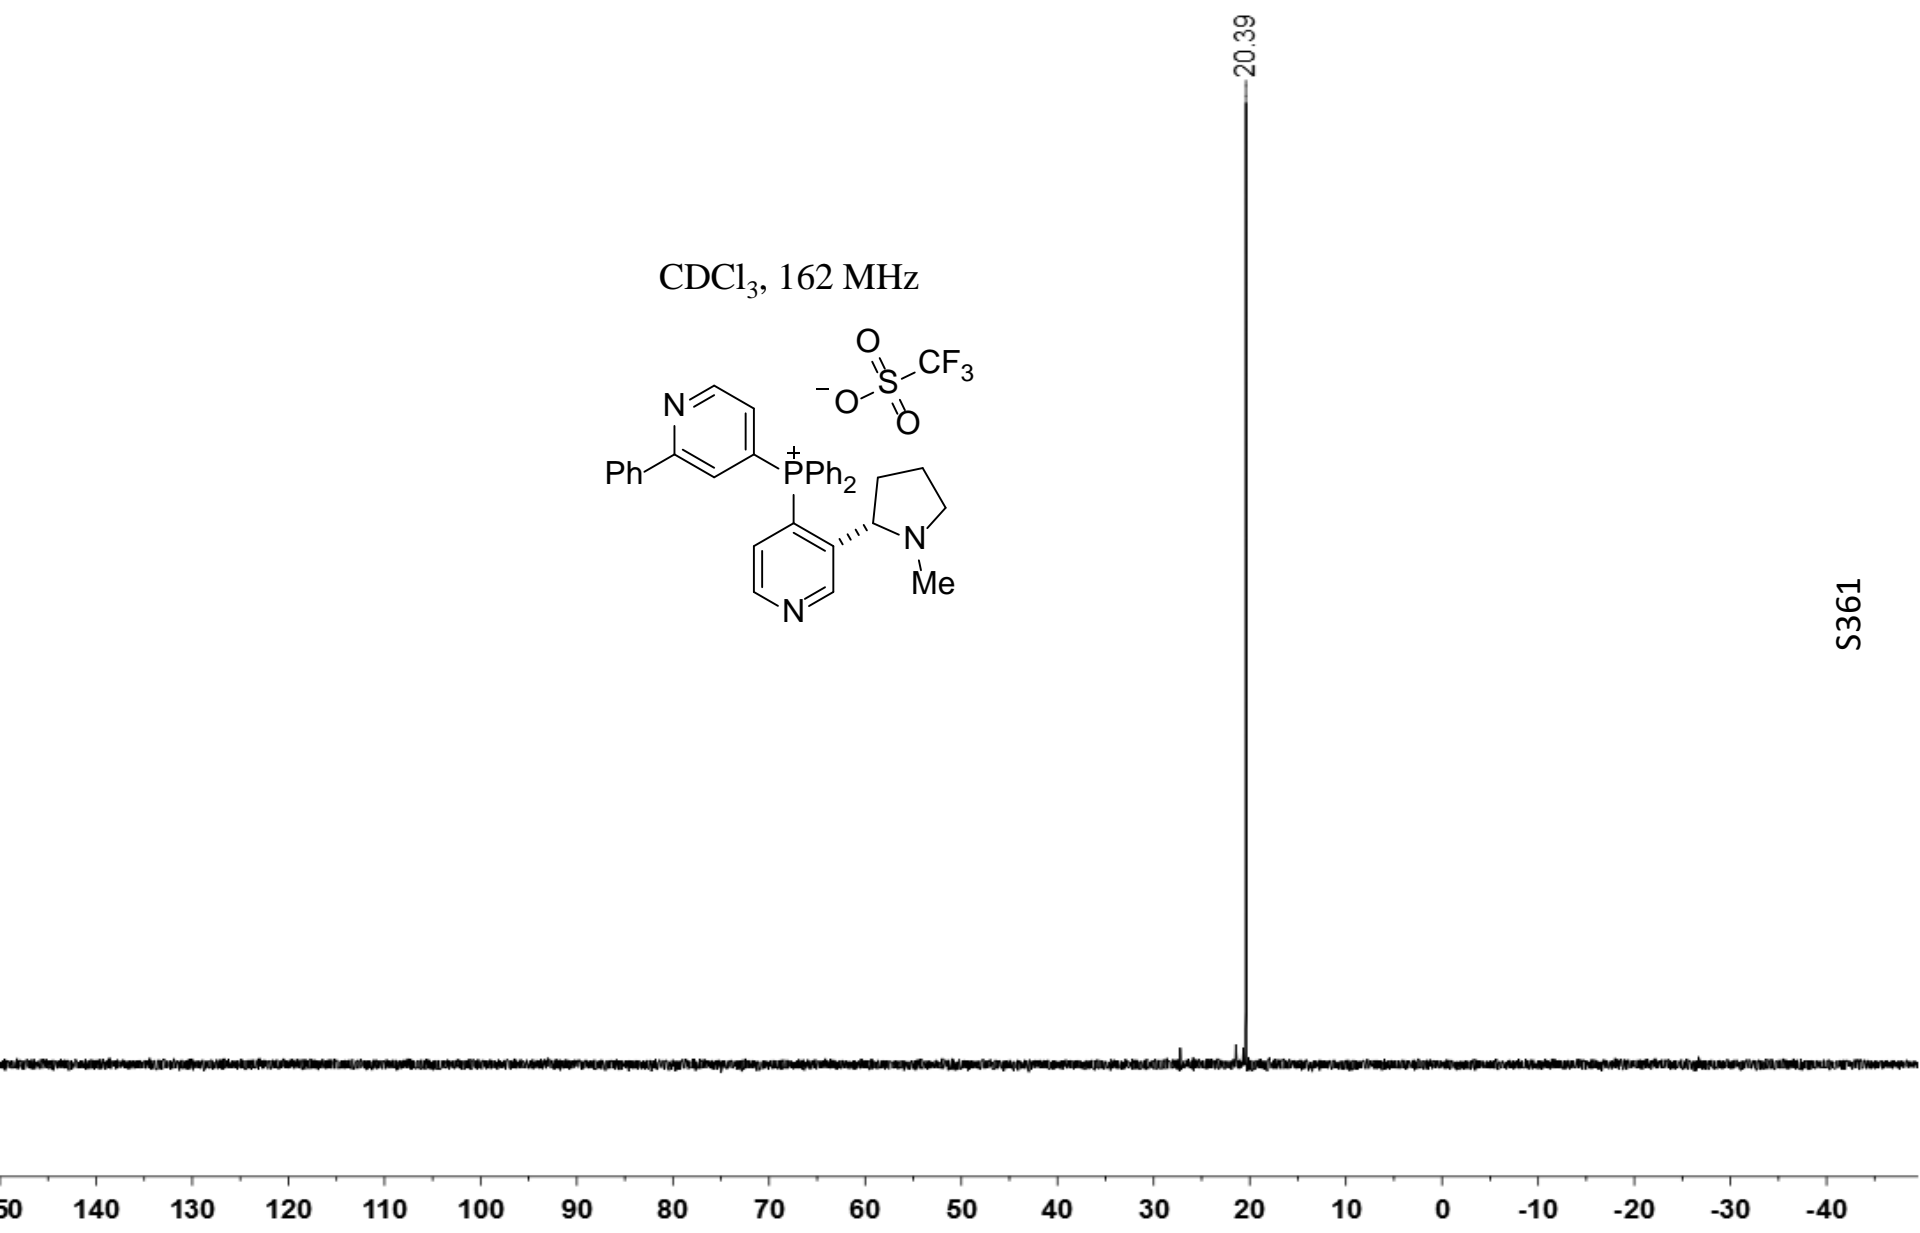

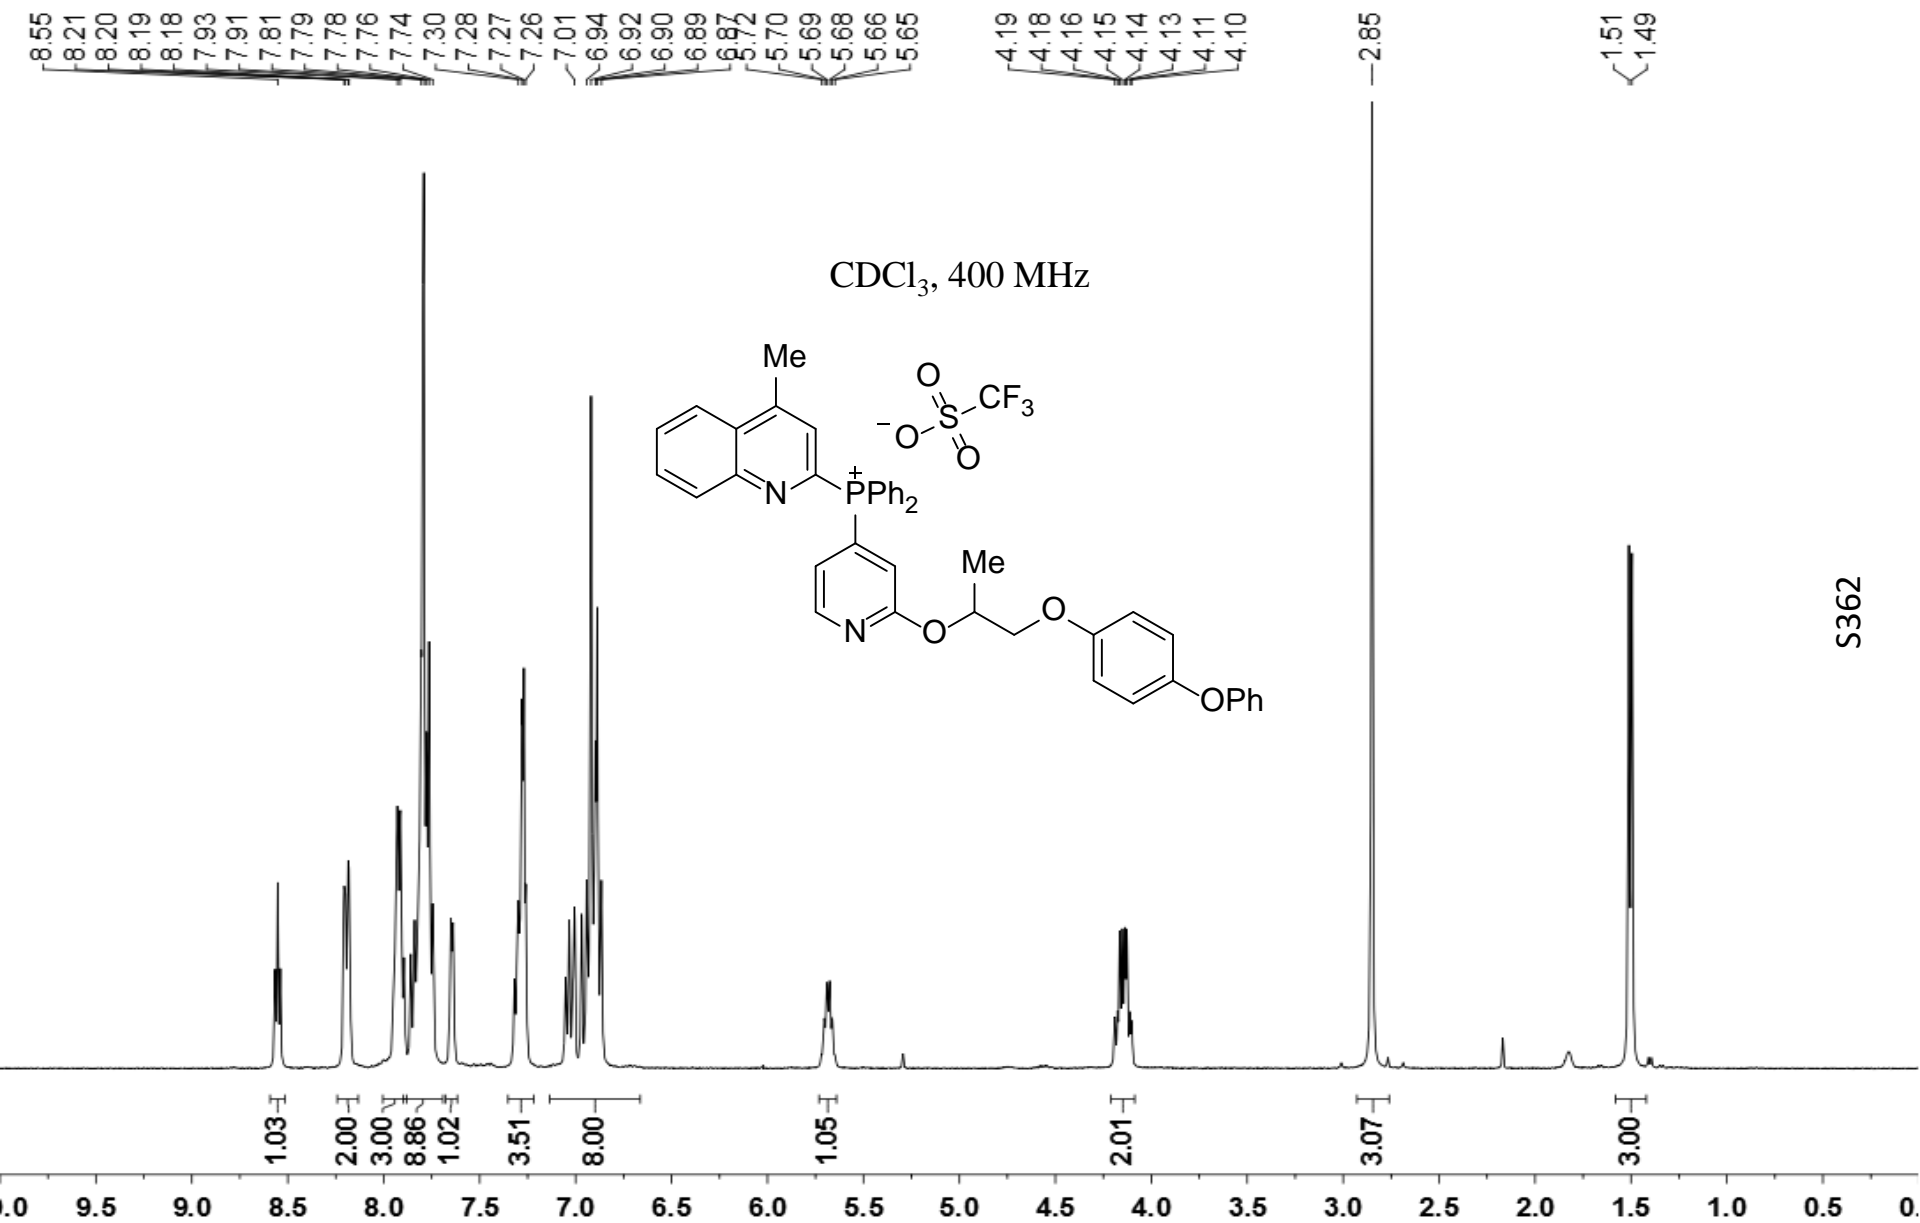

S362

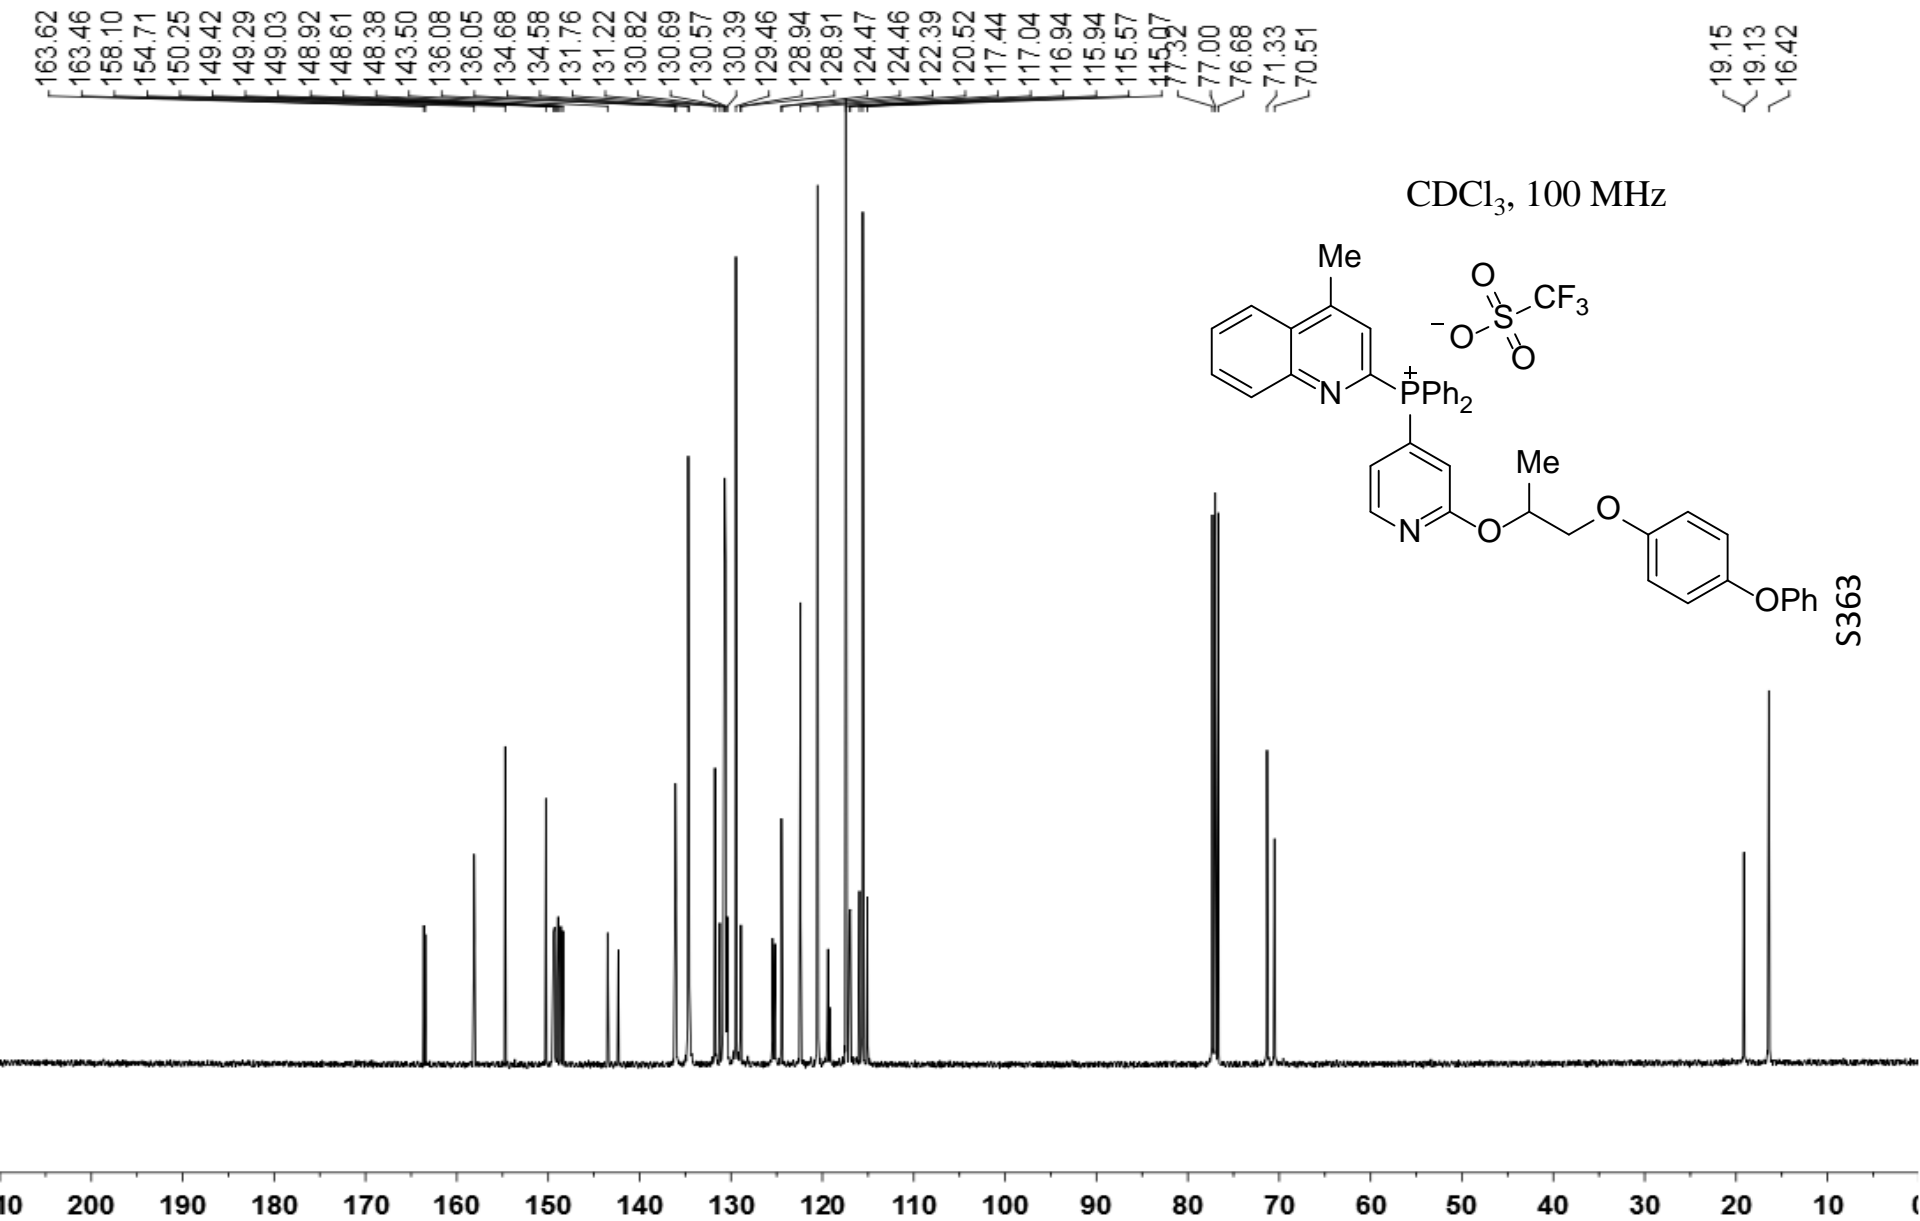

S363

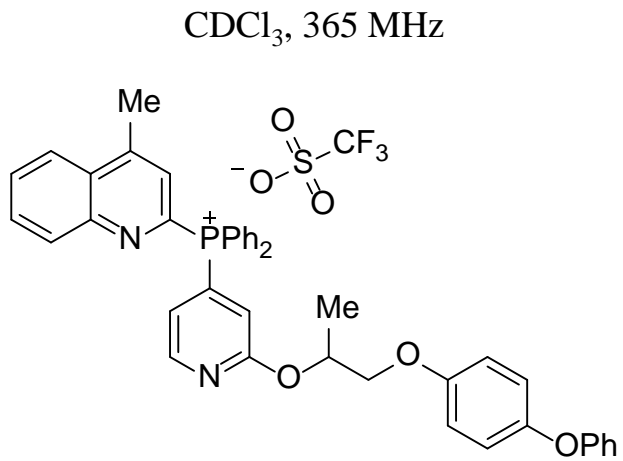

78.06

0 10 0 -10 -20 -30 -40 -50 -60 -70 -80 -90 -110 -130 -150 -170 -190

S364

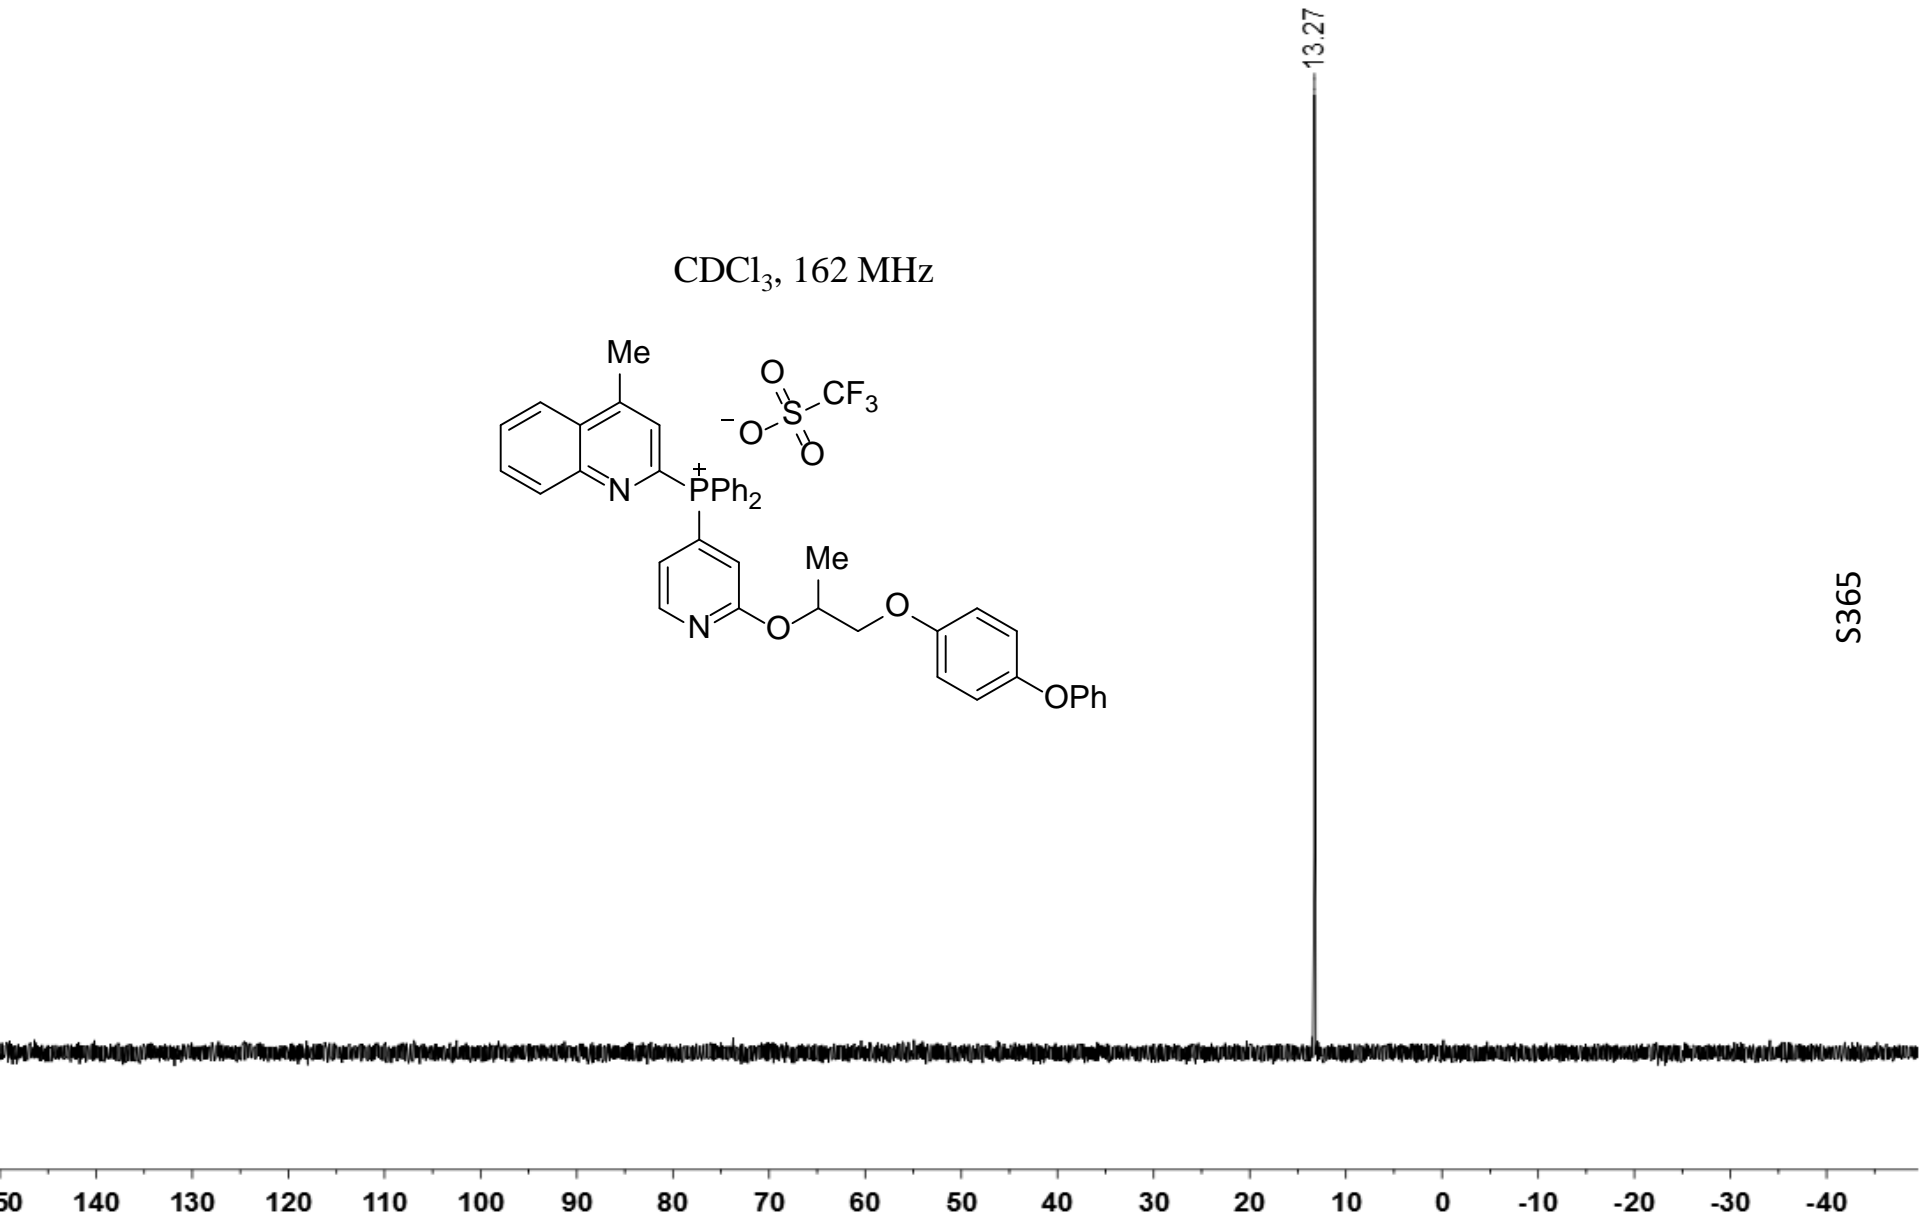

S365

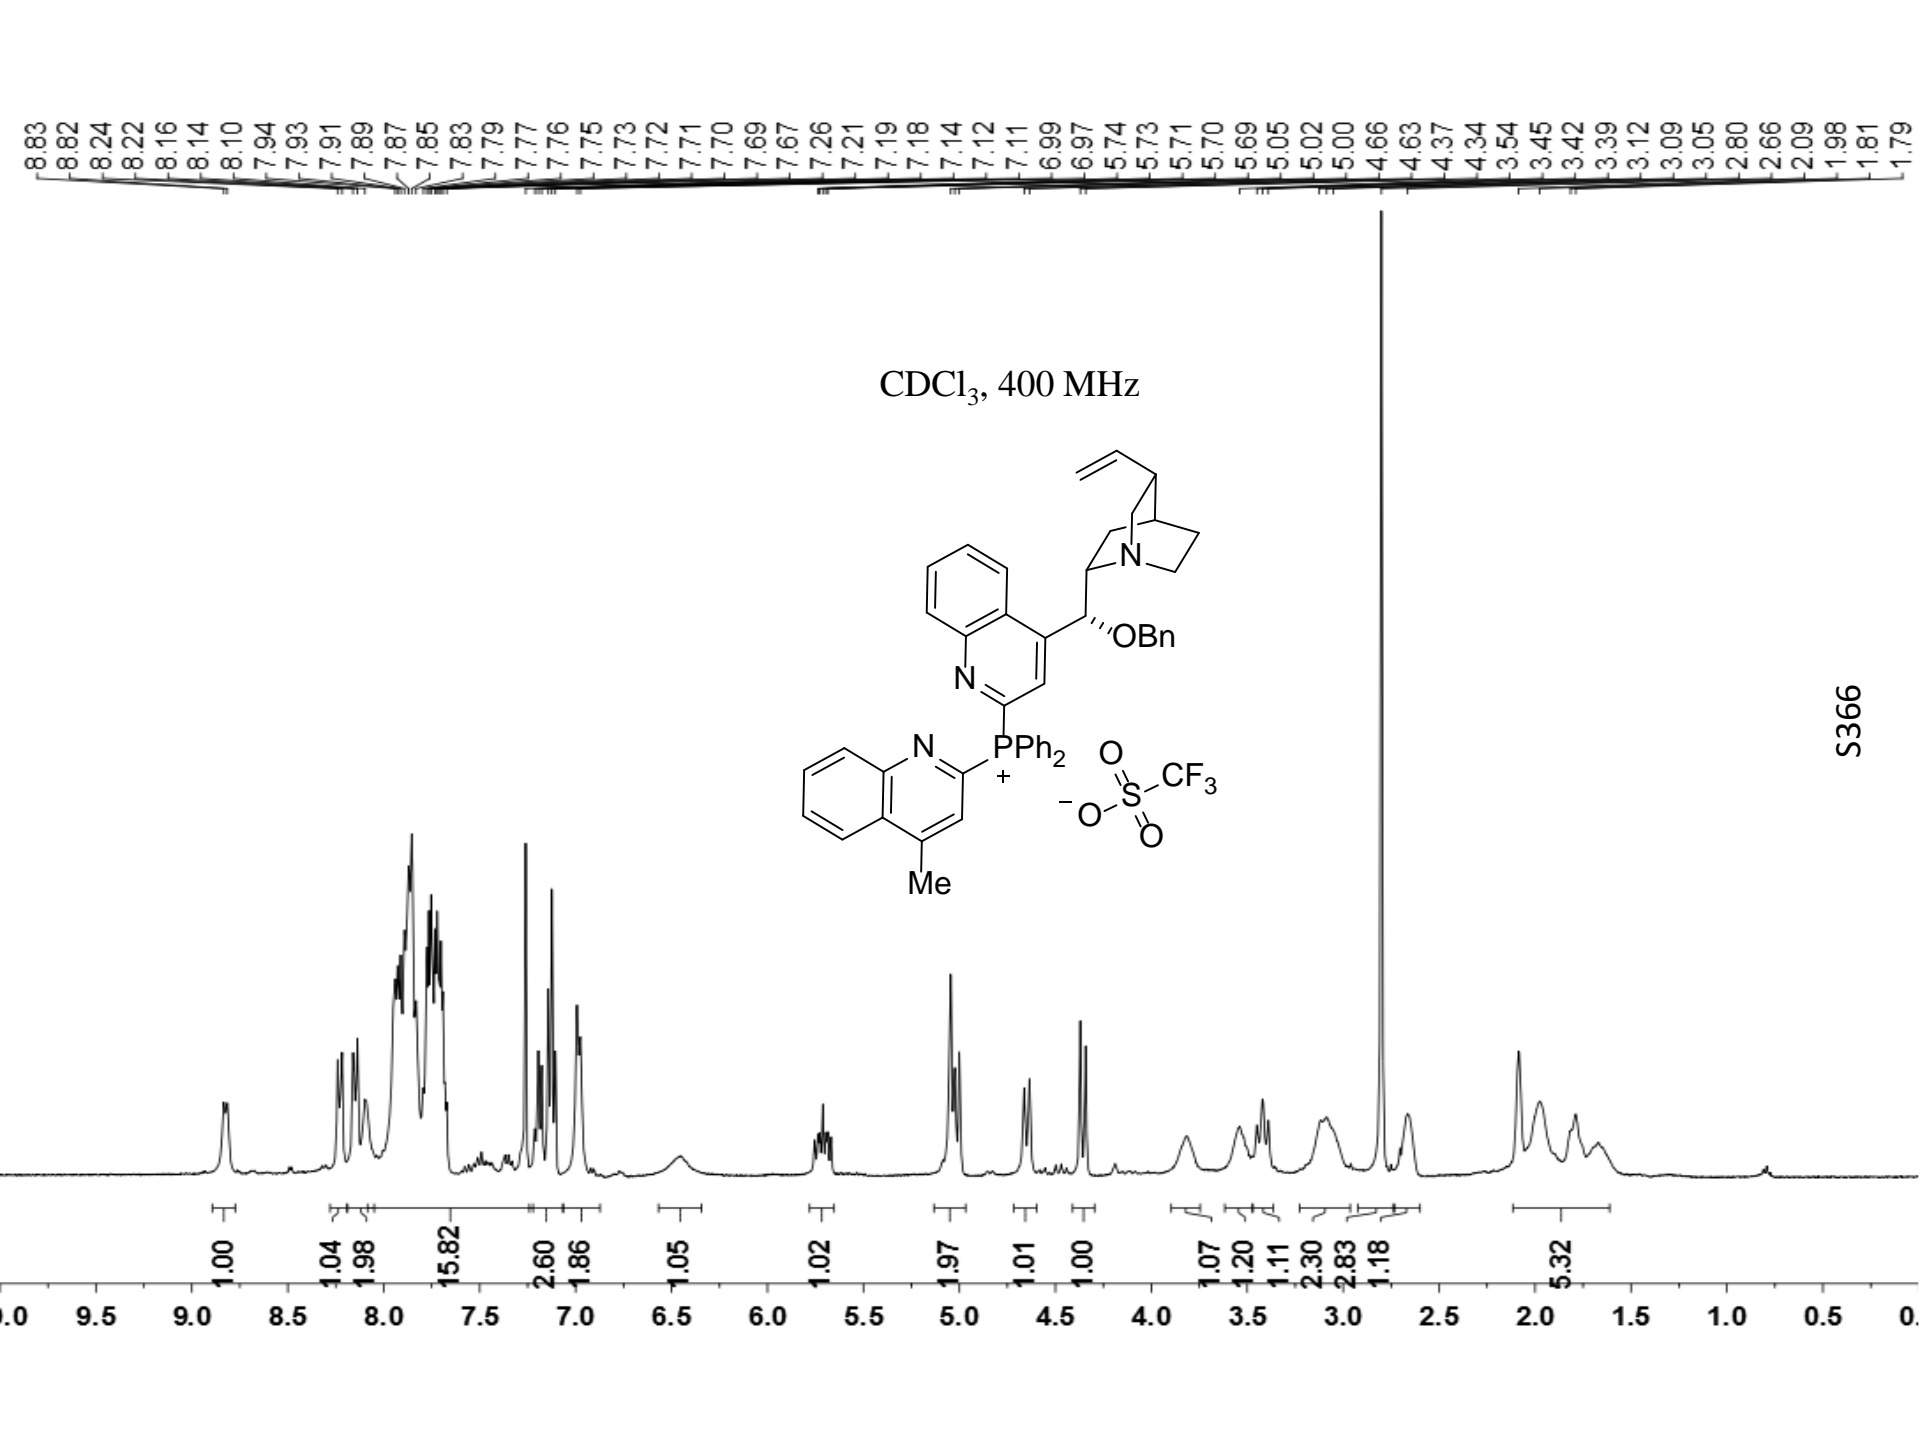

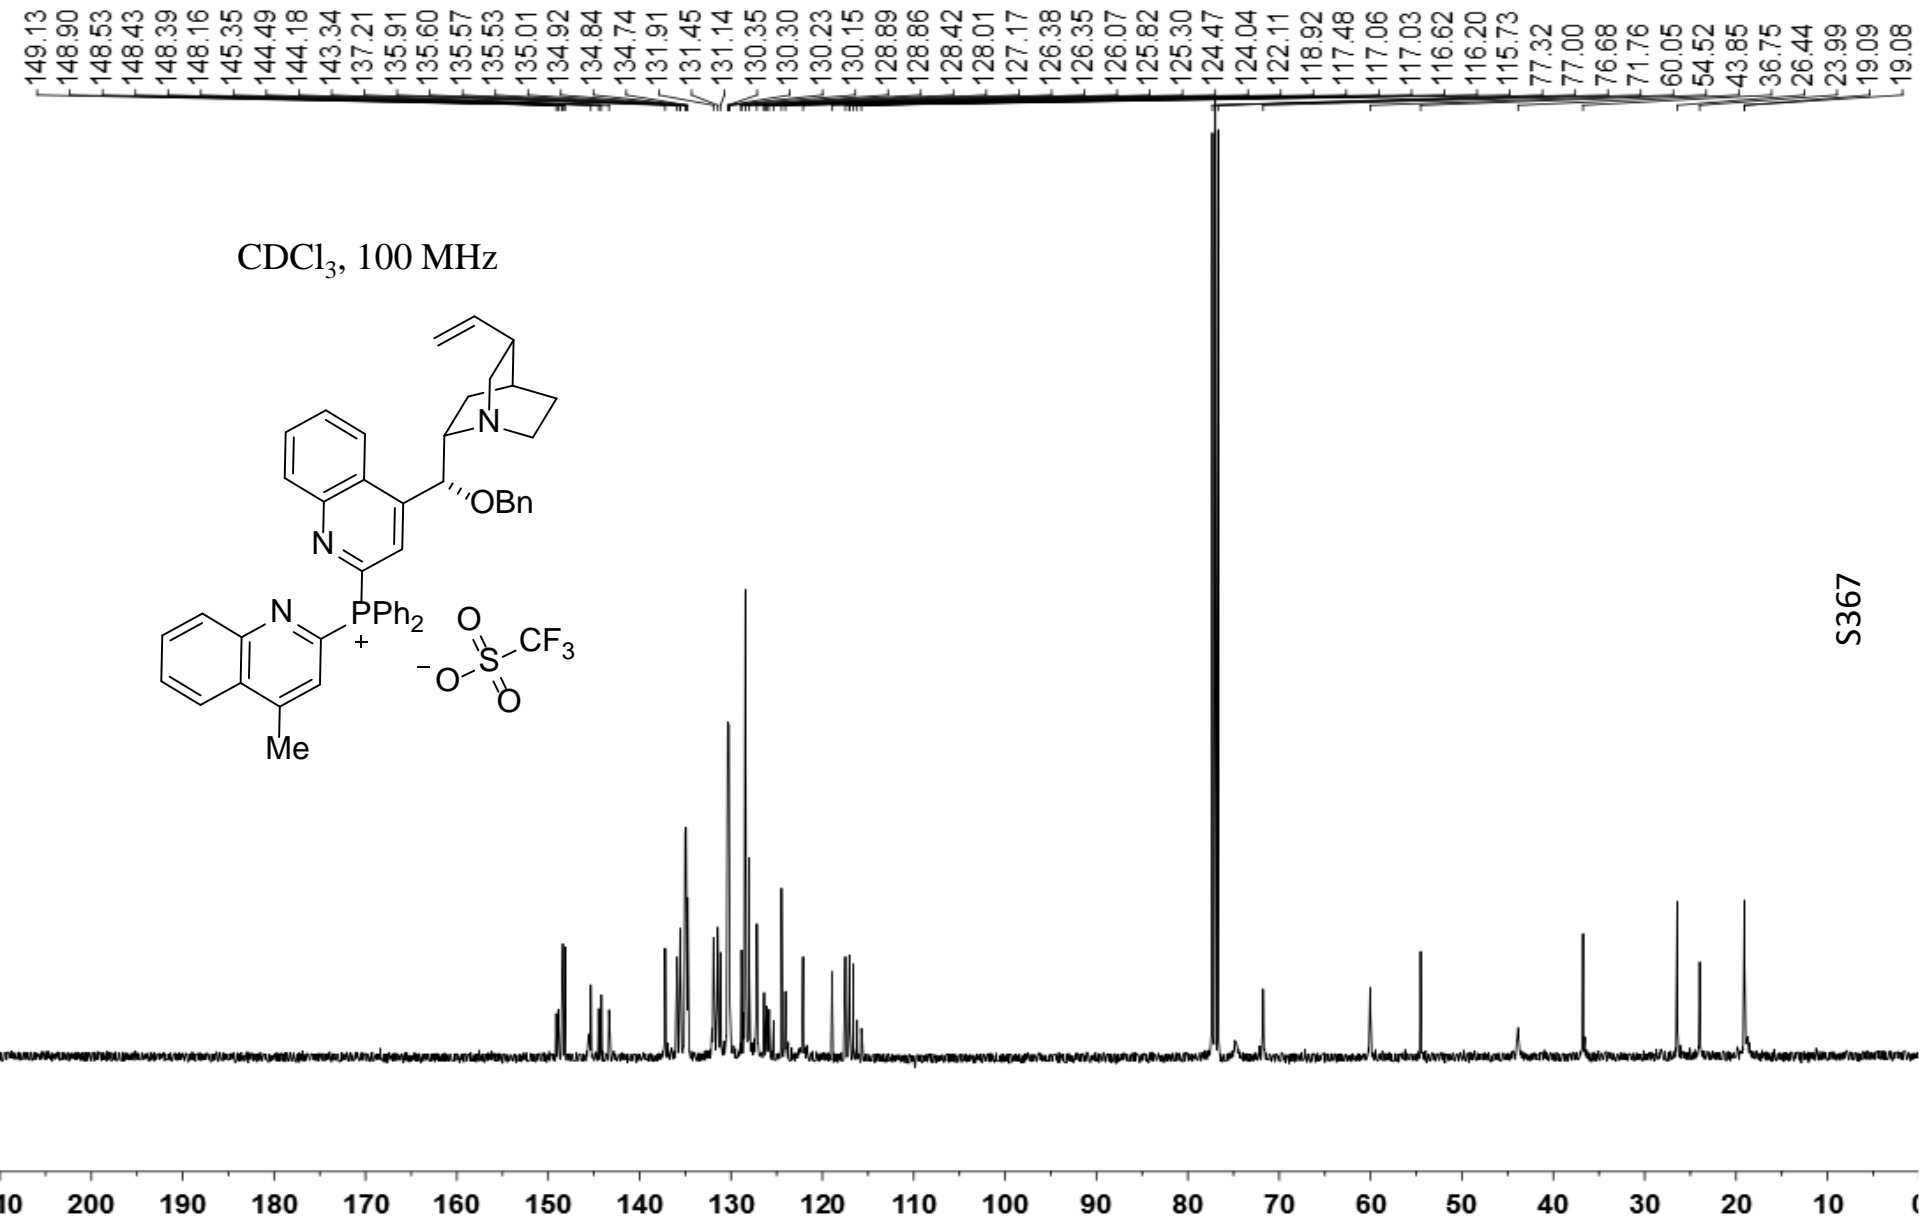

S367

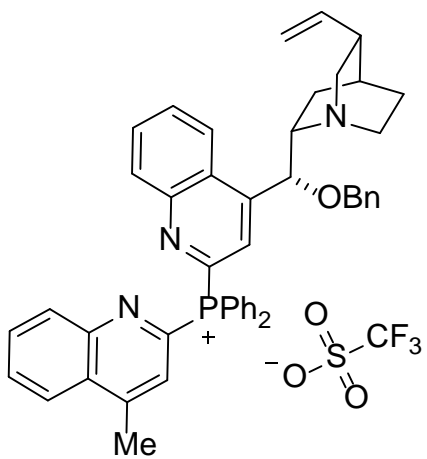

78.23

0 10 0 -10 -20 -30 -40 -50 -60 -70 -80 -90 -110 -130 -150 -170 -190

S368



CDCl<sub>3</sub>, 162 MHz

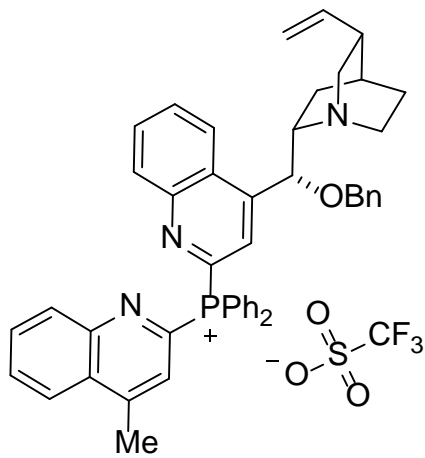

8.74

S369

140 130 120 110 100 90 80 70 60 50 40 30 20 10 0 -10 -20 -30 -40

8.76  
8.74  
8.72  
8.03  
8.01  
7.88  
7.53  
7.52  
7.48  
7.47  
7.45  
7.43  
7.41  
7.40  
7.39  
7.26

CDCl<sub>3</sub>, 400 MHz

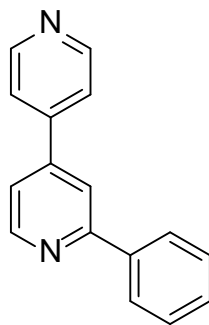

4a

S370

3.07

2.00  
1.03

5.99

9.5 9.0 8.5 8.0 7.5 7.0 6.5 6.0 5.5 5.0 4.5 4.0 3.5 3.0 2.5 2.0 1.5 1.0 ppm

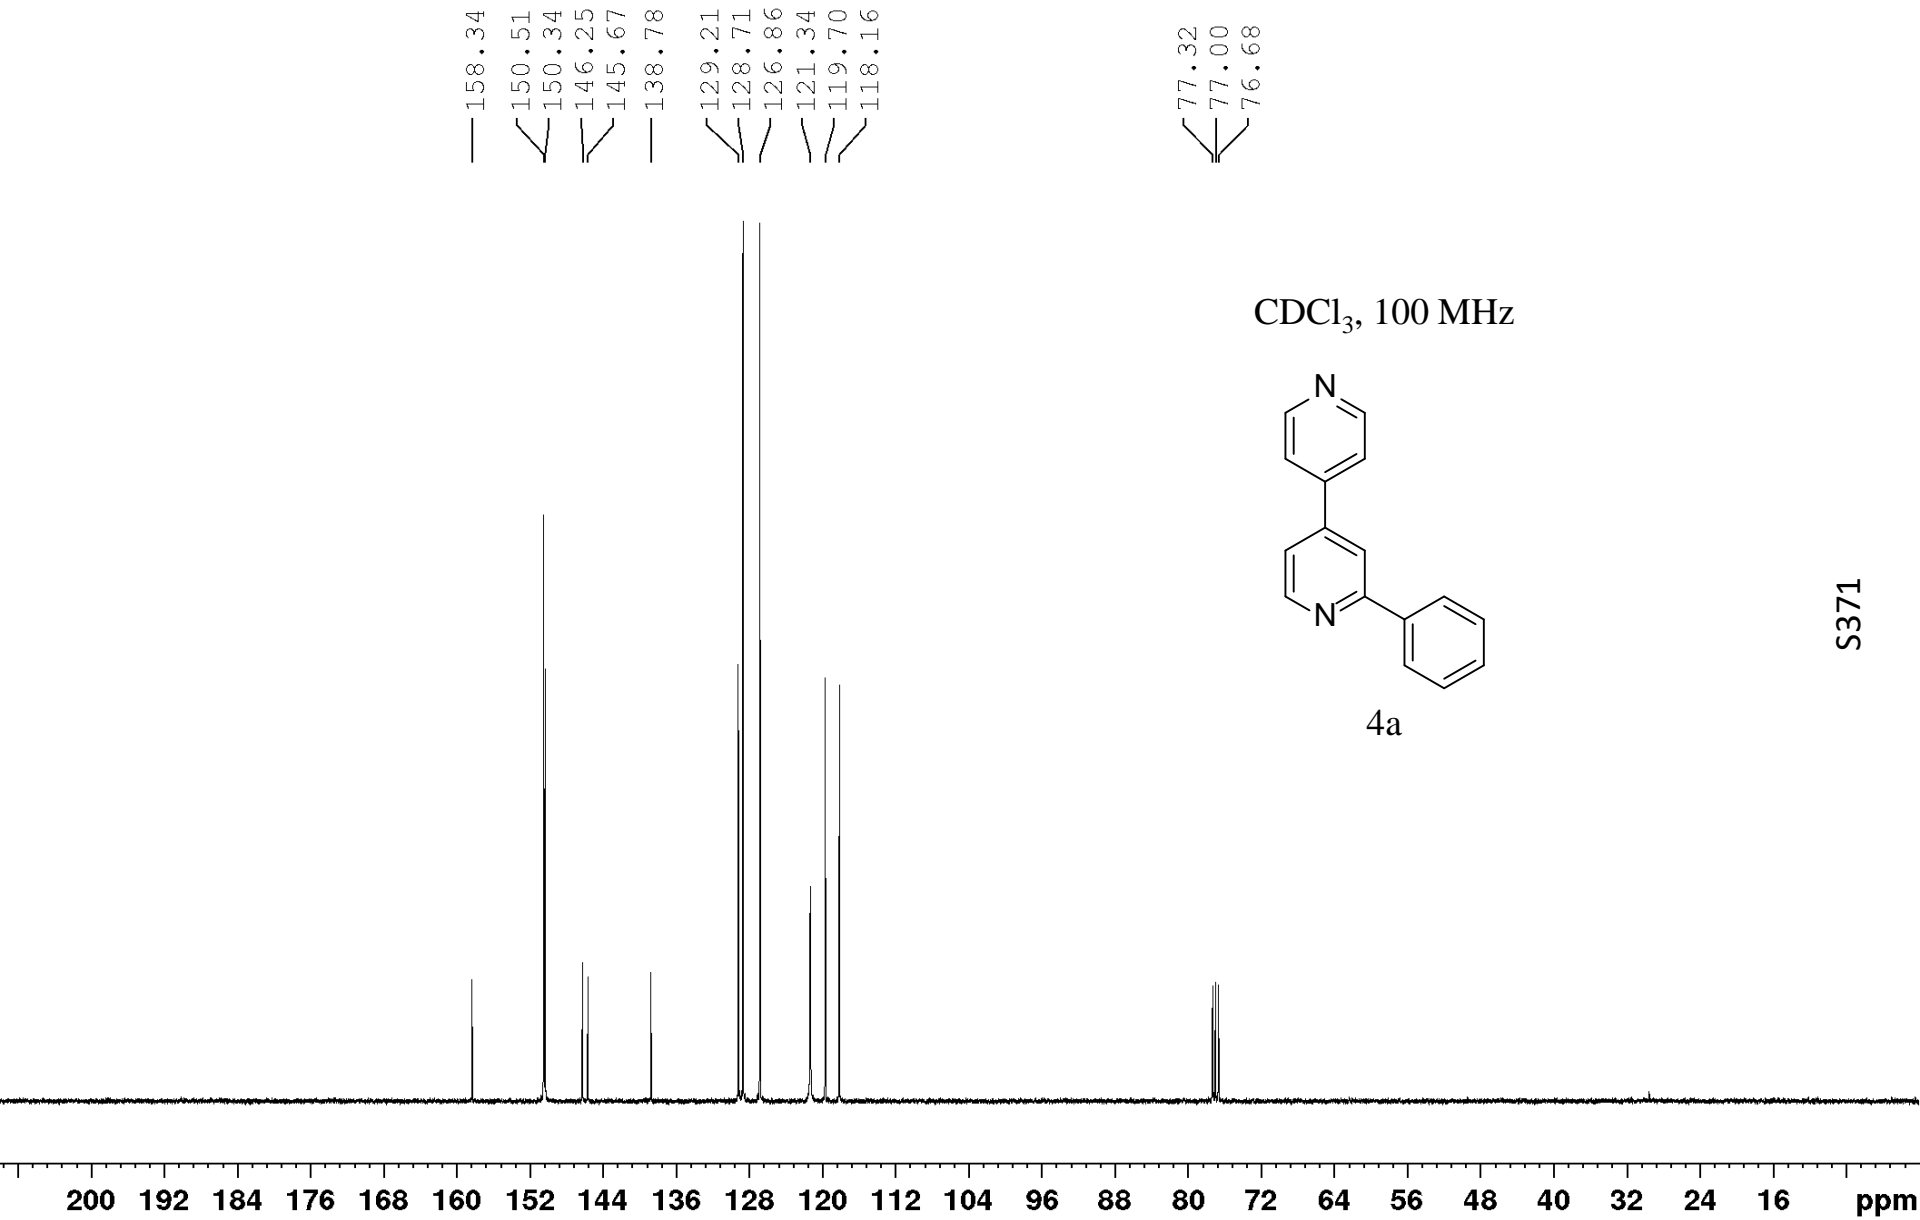

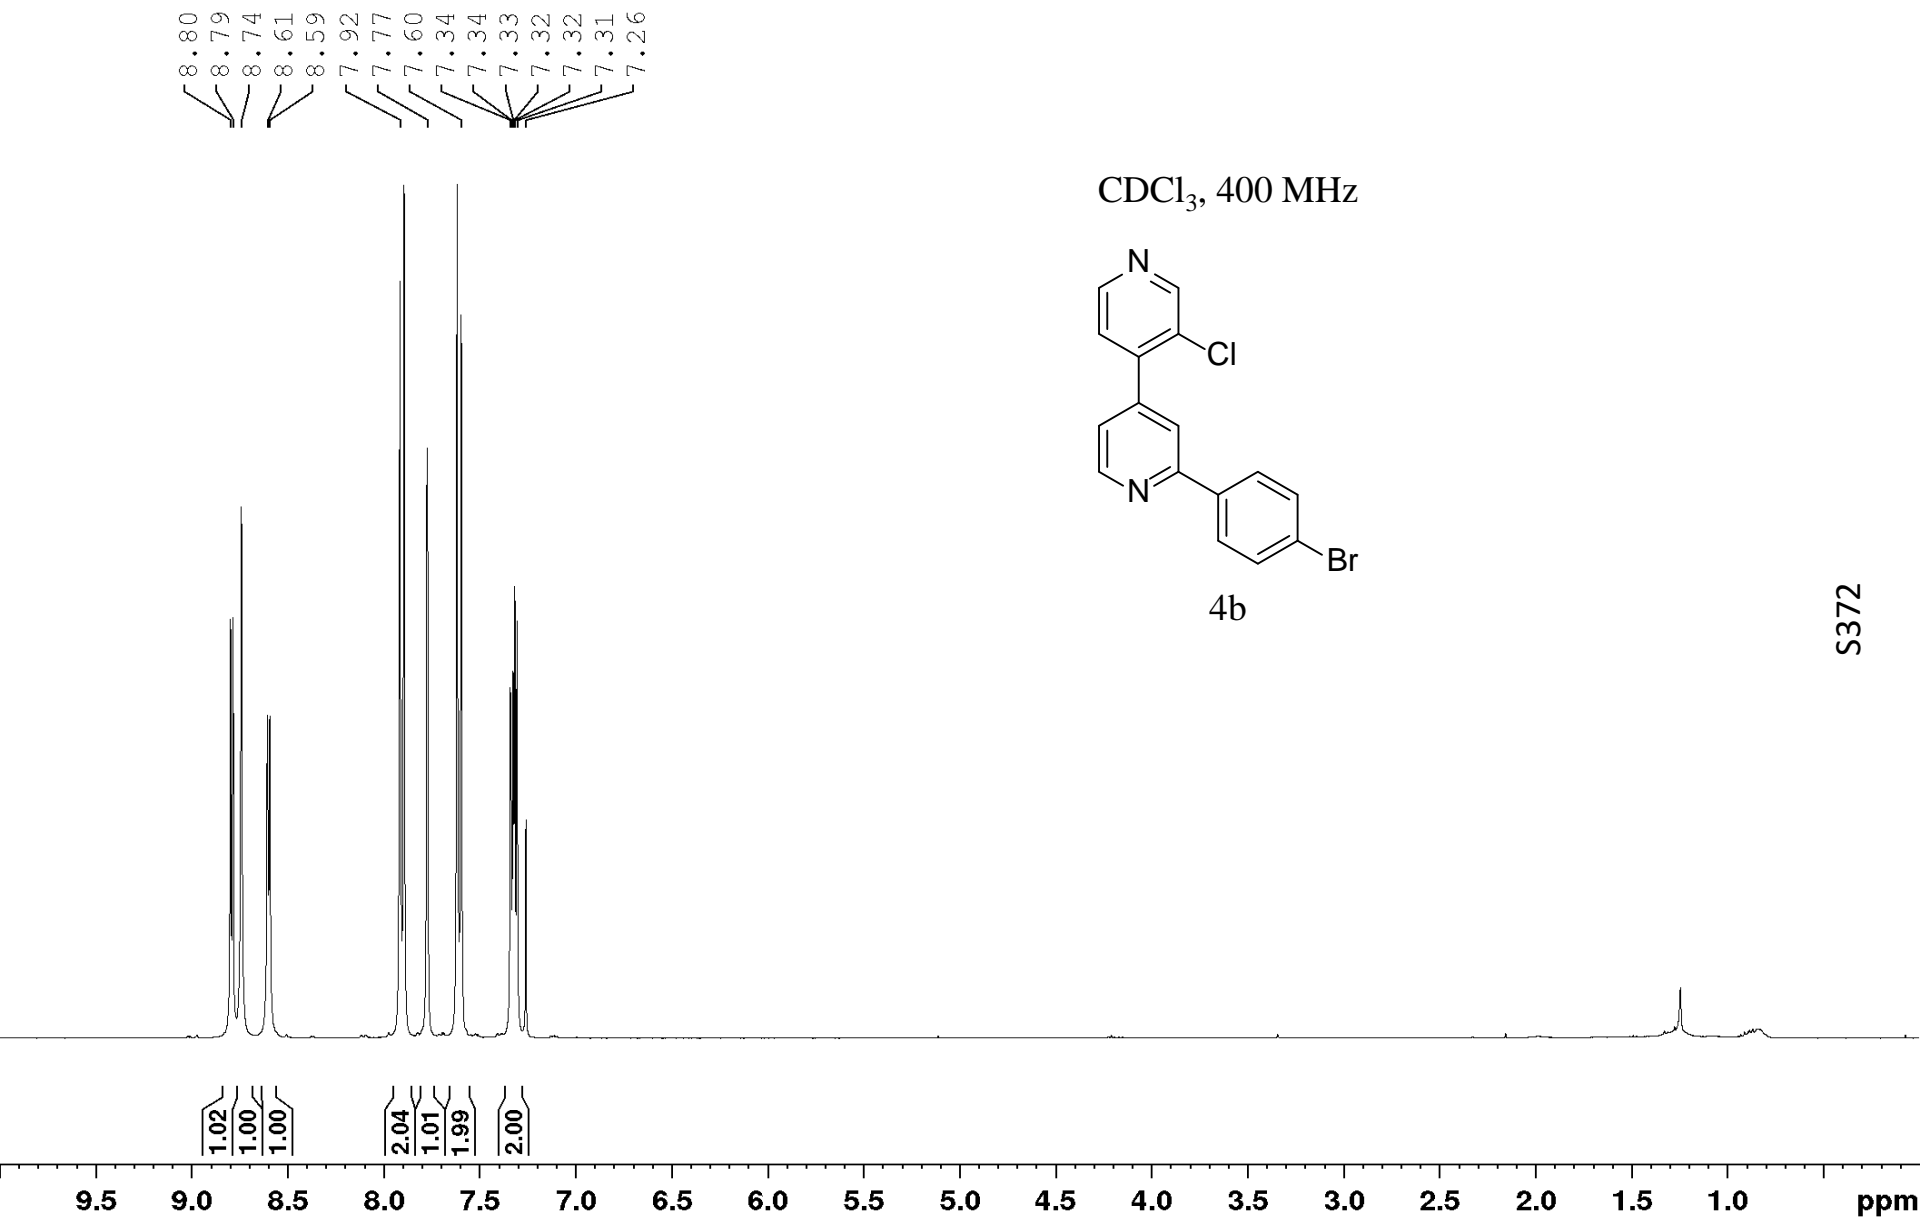

S372

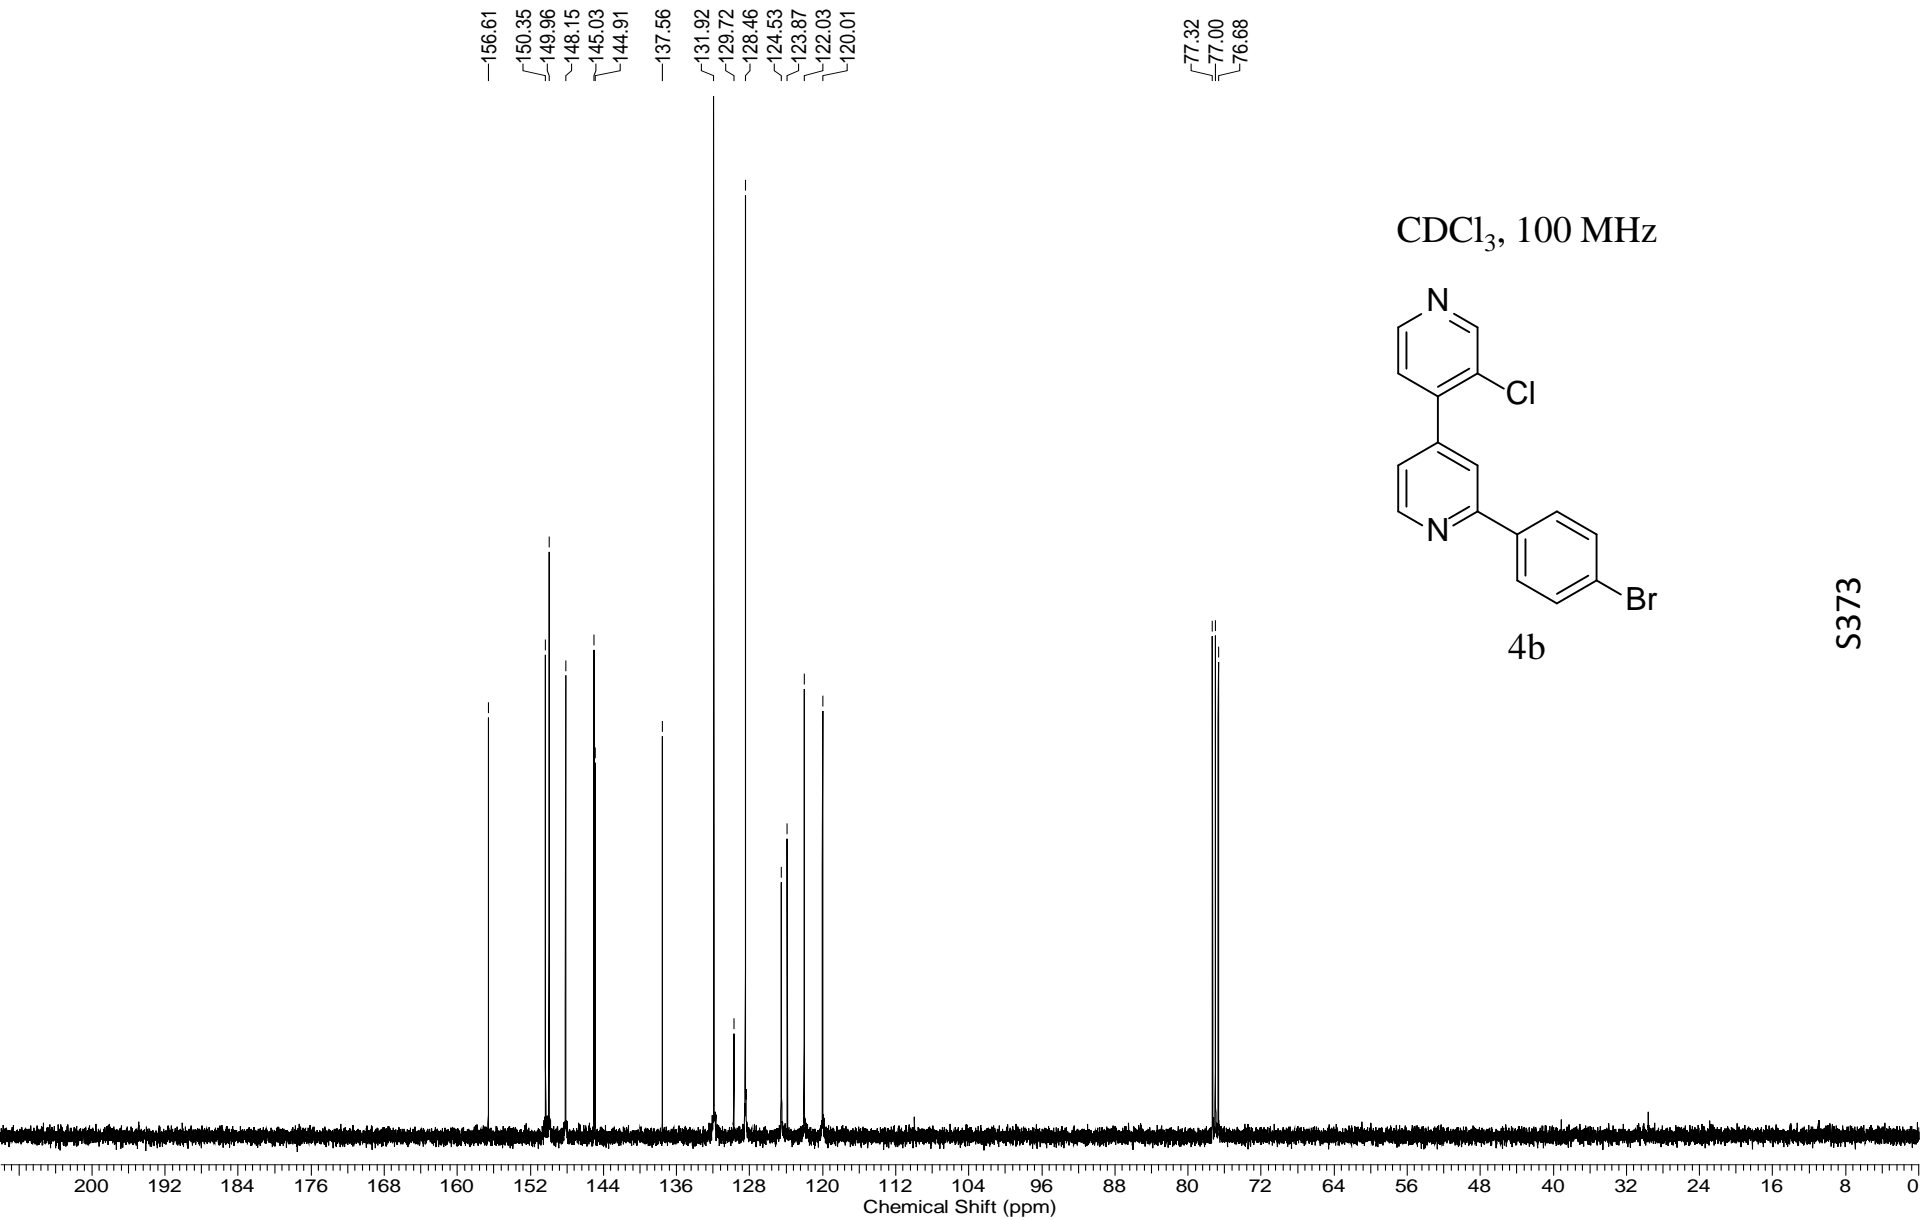

S373

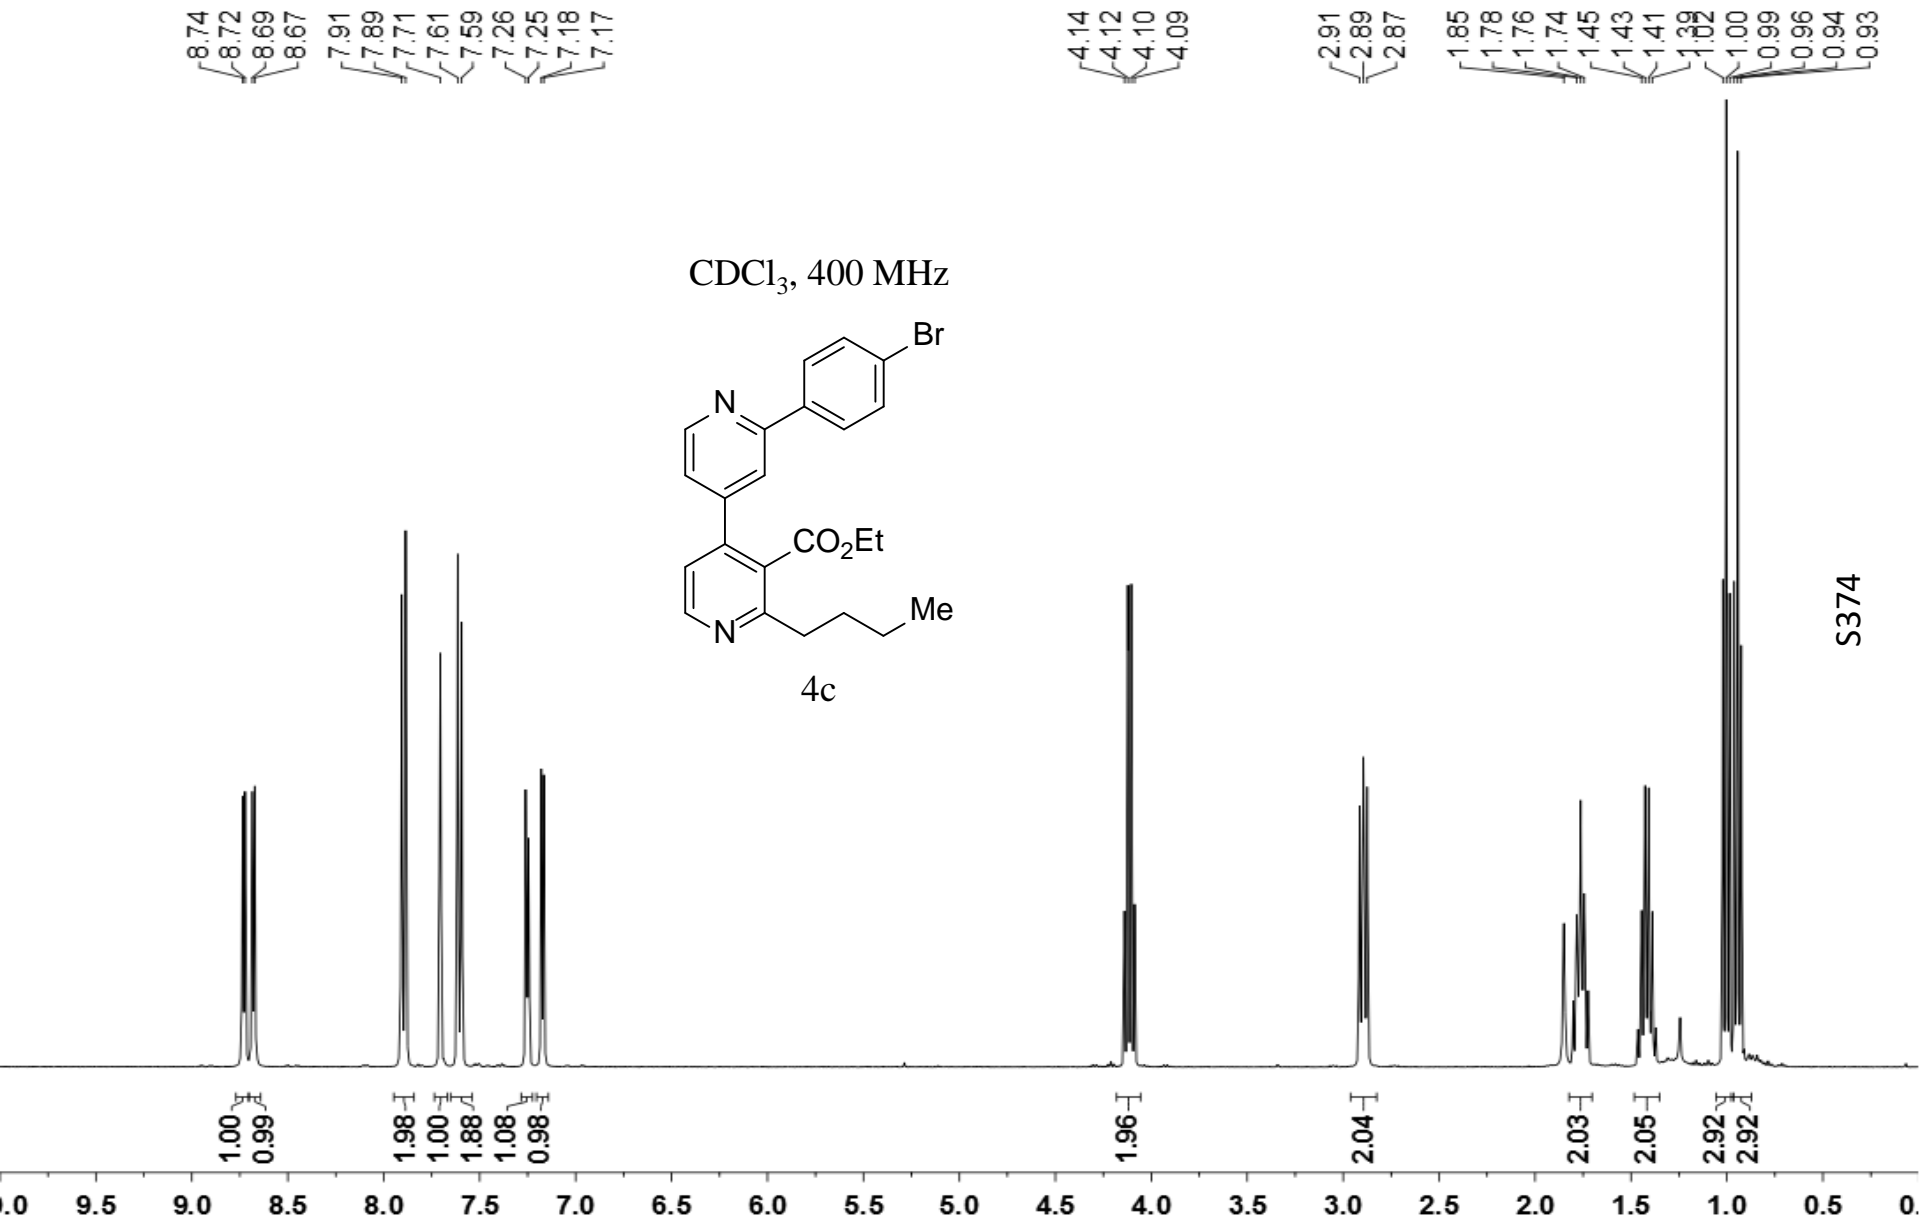

S374

CDCl<sub>3</sub>, 100 MHz

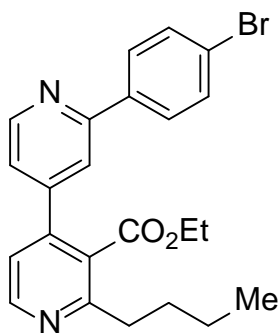

167.97  
160.08  
156.52  
150.14  
149.95  
147.22  
145.26  
137.49  
131.99  
128.40  
127.85  
123.92  
121.29  
120.68  
119.21

77.32  
77.00  
76.68

61.69

36.02  
31.93

22.66

13.86  
13.60

S375

200 190 180 170 160 150 140 130 120 110 100 90 80 70 60 50 40 30 20 10

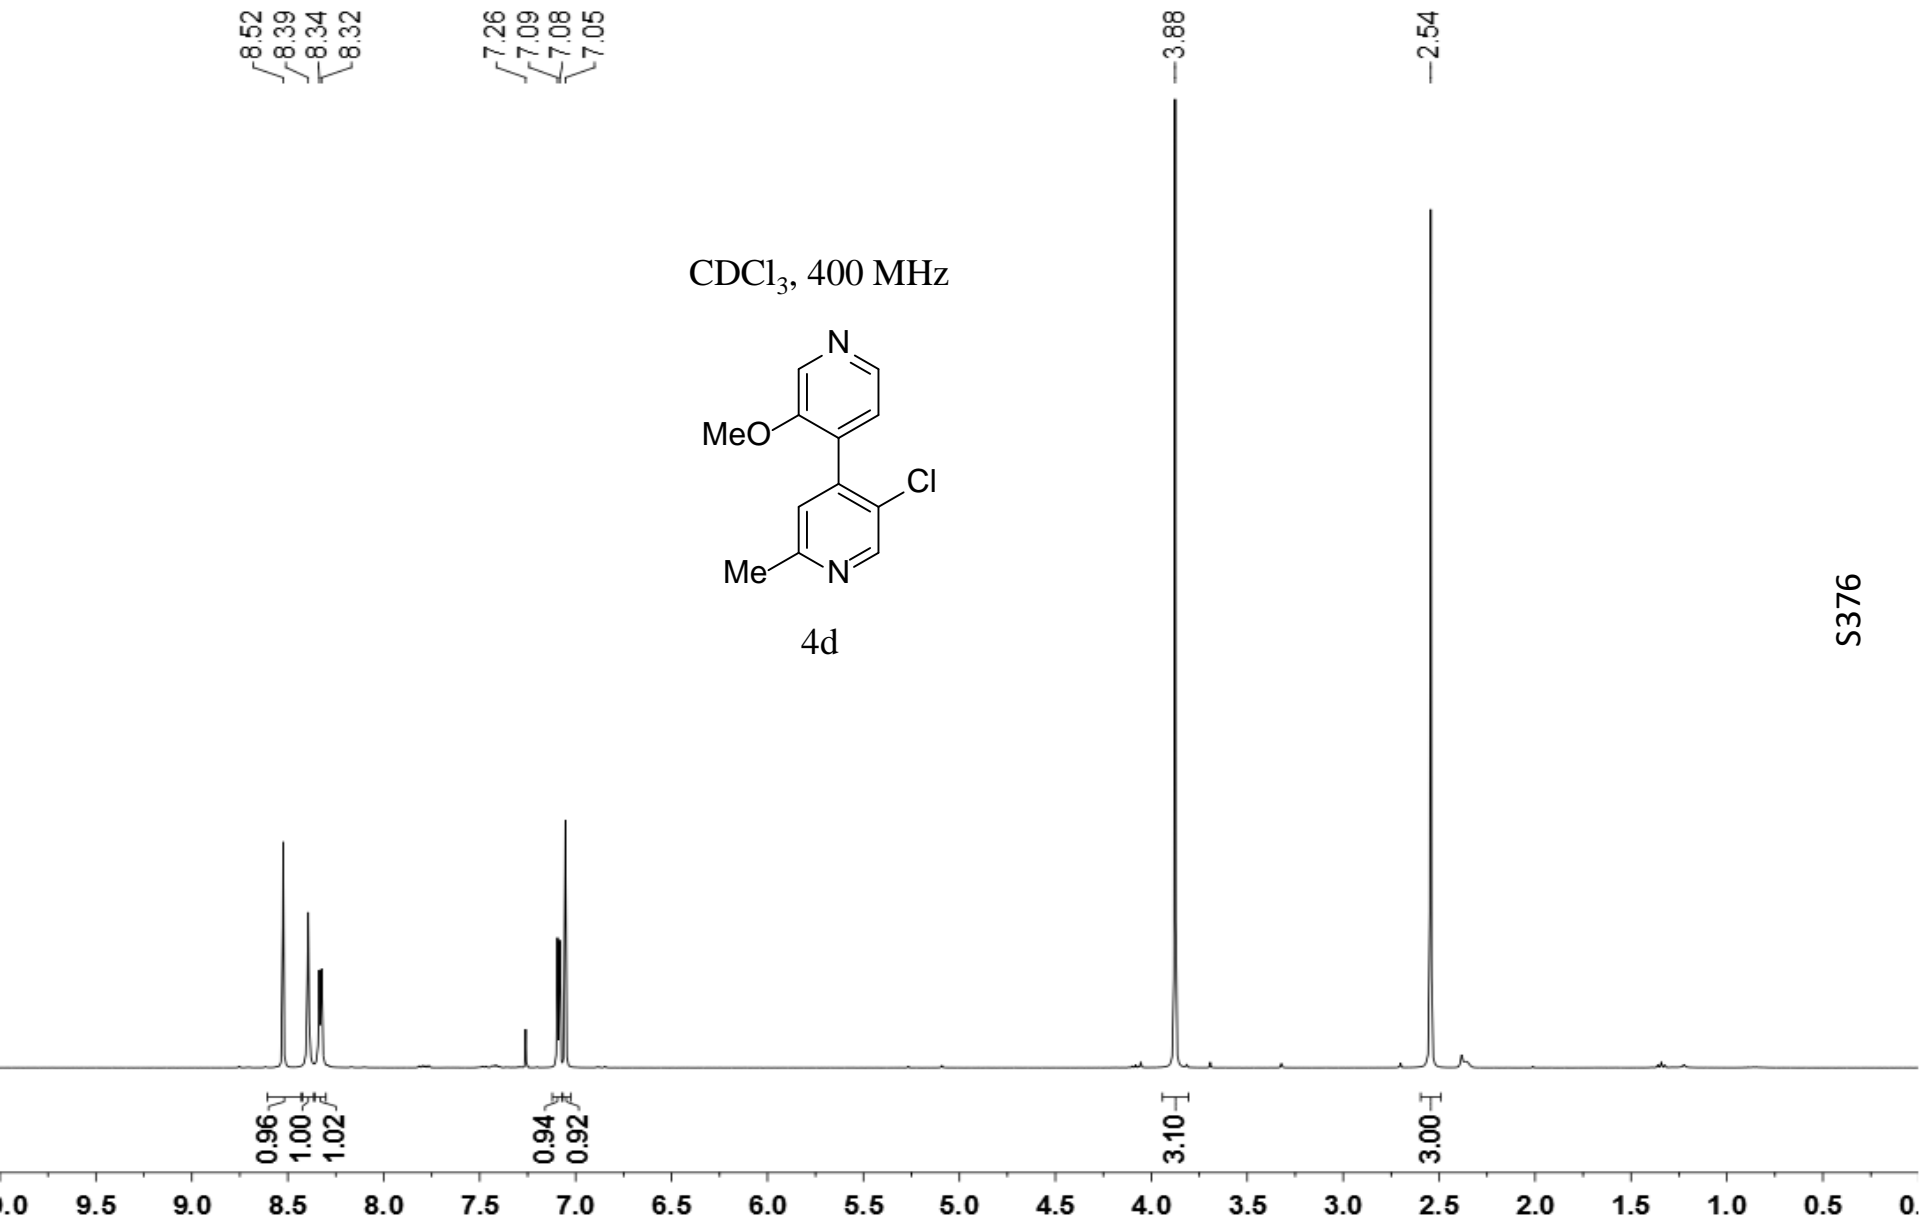



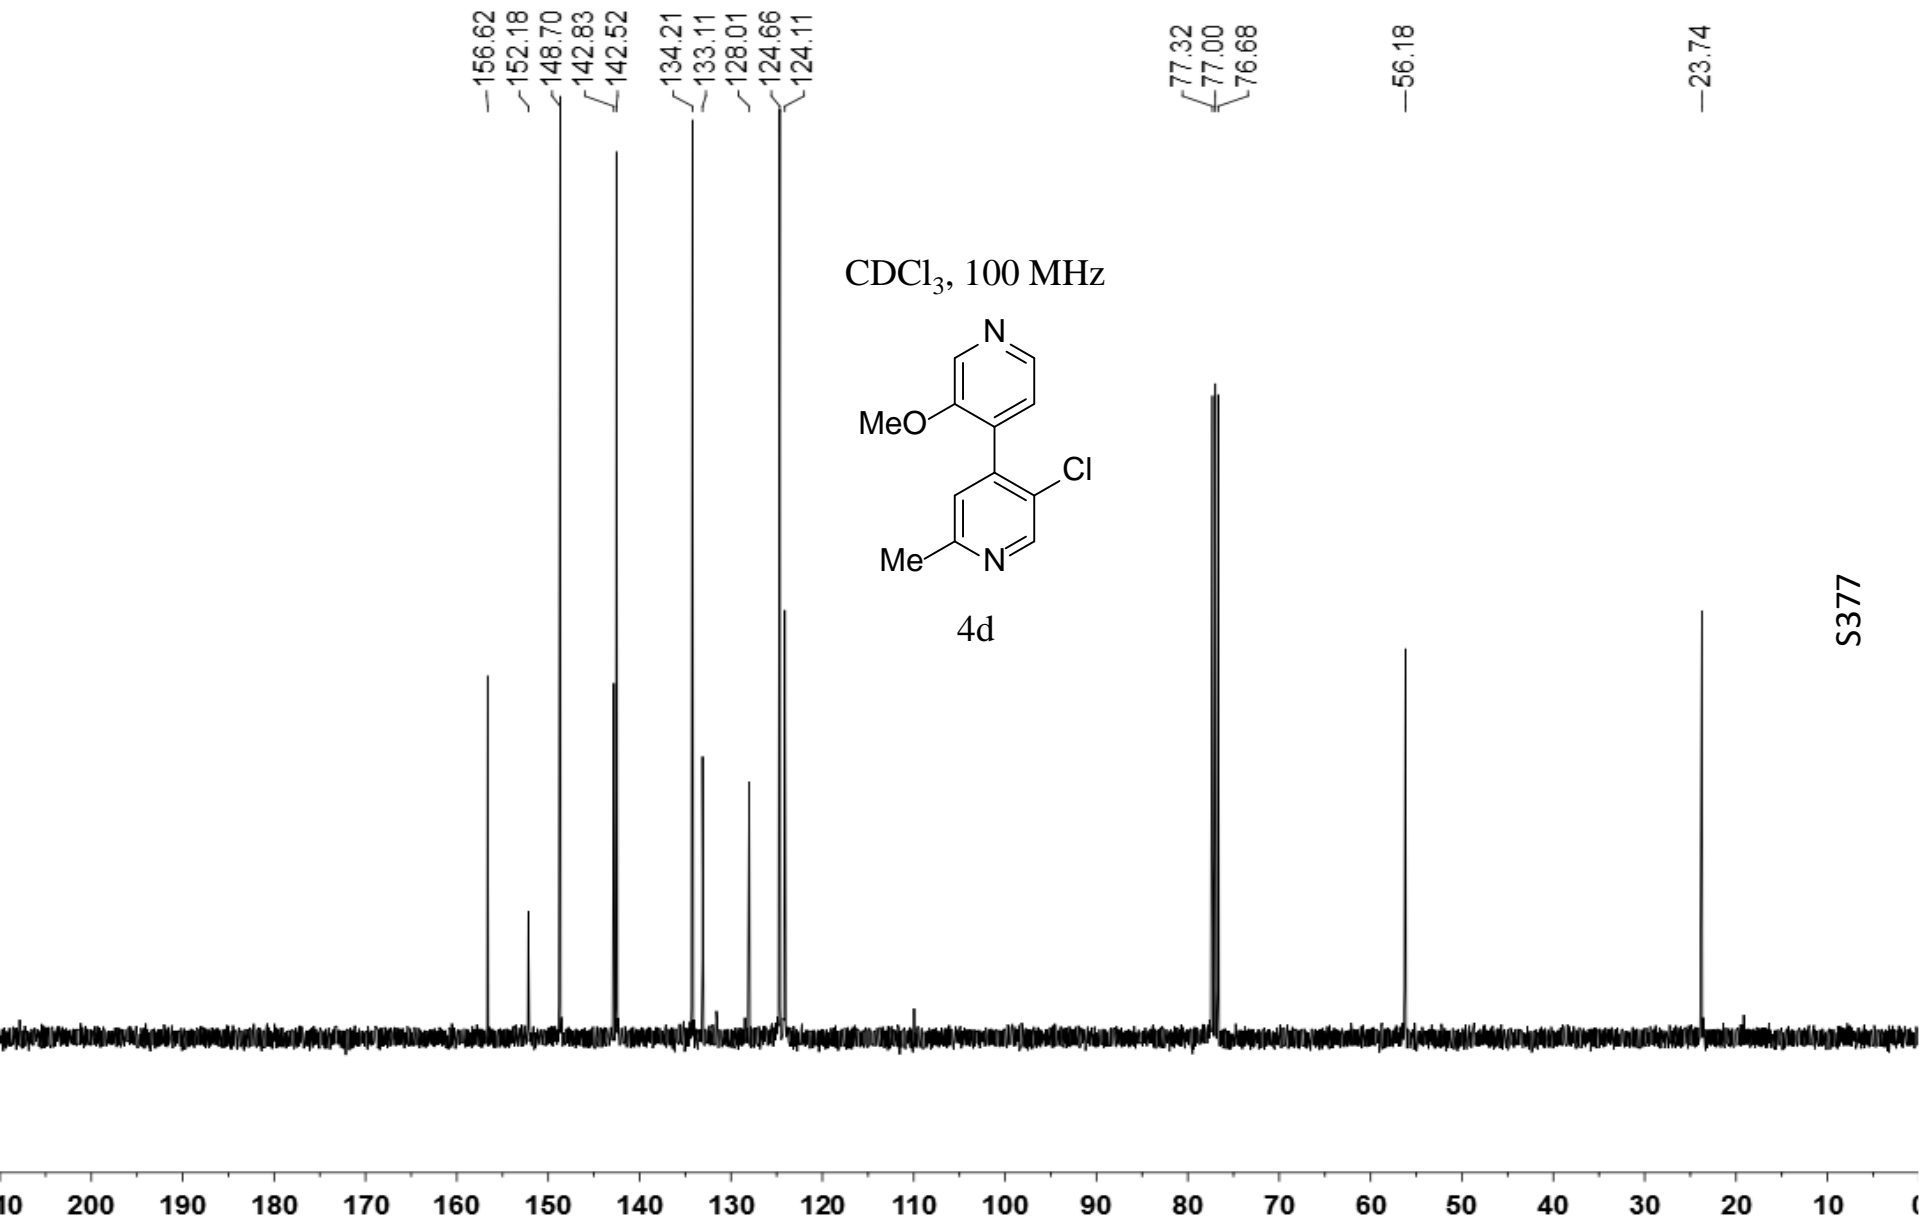

CDCl<sub>3</sub>, 100 MHz

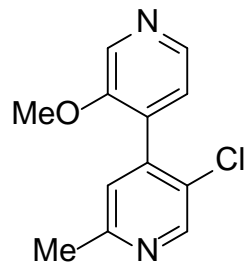

4d

S377

8.69  
8.56  
8.55  
8.53  
8.49  
8.48

7.25  
7.24  
7.22  
7.21  
7.20

CDCl<sub>3</sub>, 400 MHz

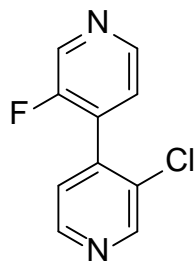

4e

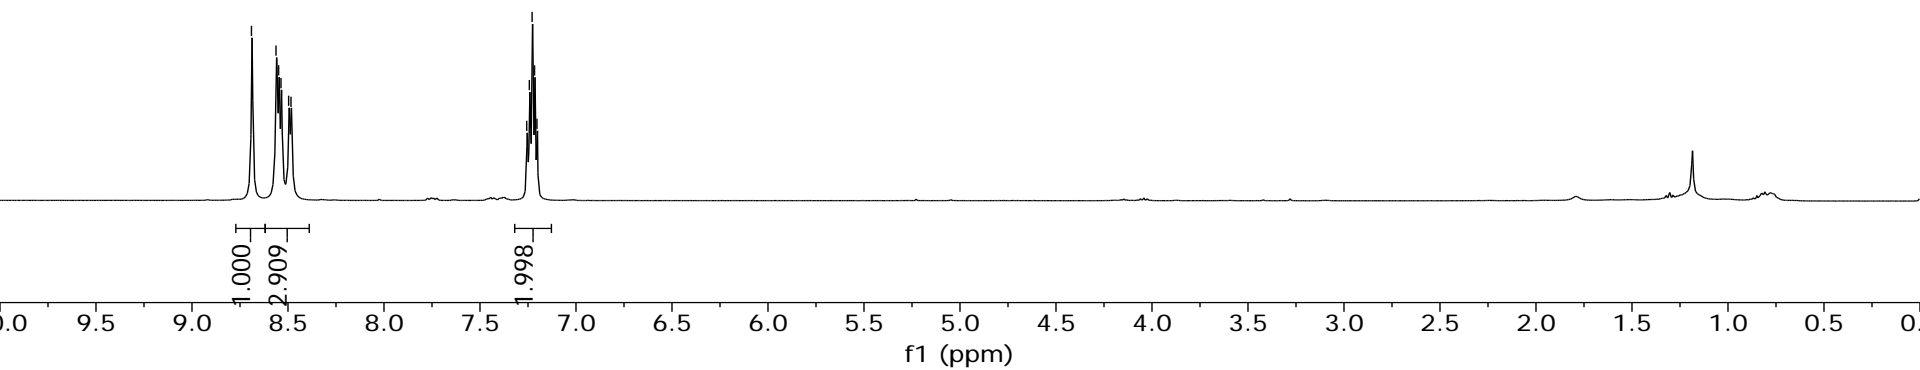

S378

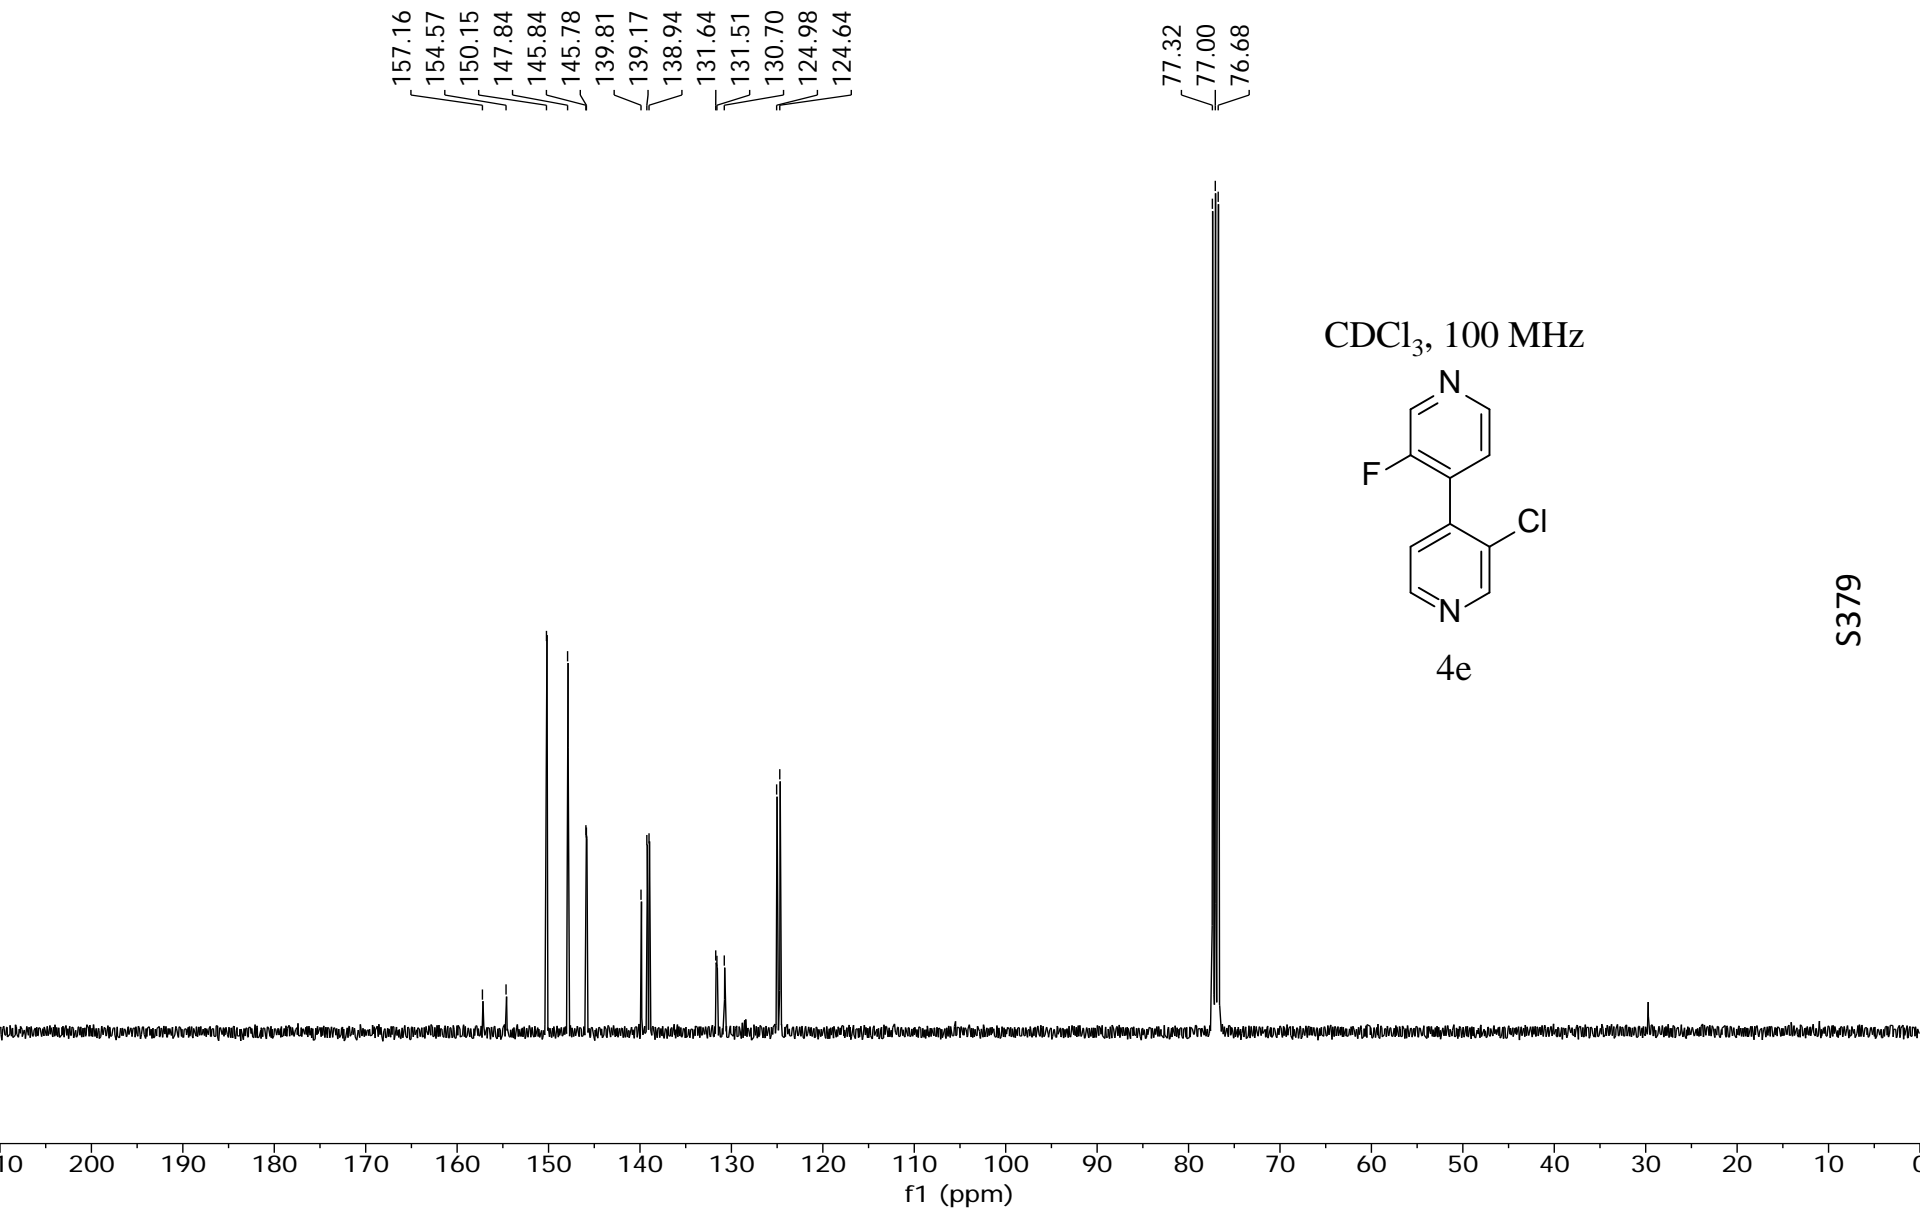

CDCl<sub>3</sub>, 365 MHz

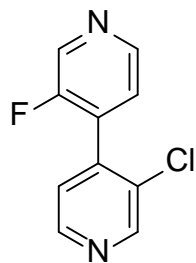

4e

-128.05  
-128.07

S380

0 0 -10 -20 -30 -40 -50 -60 -70 -80 -90 -100 -110 -120 -130 -140 -150 -160 -170 -180 -190 -200  
f1 (ppm)

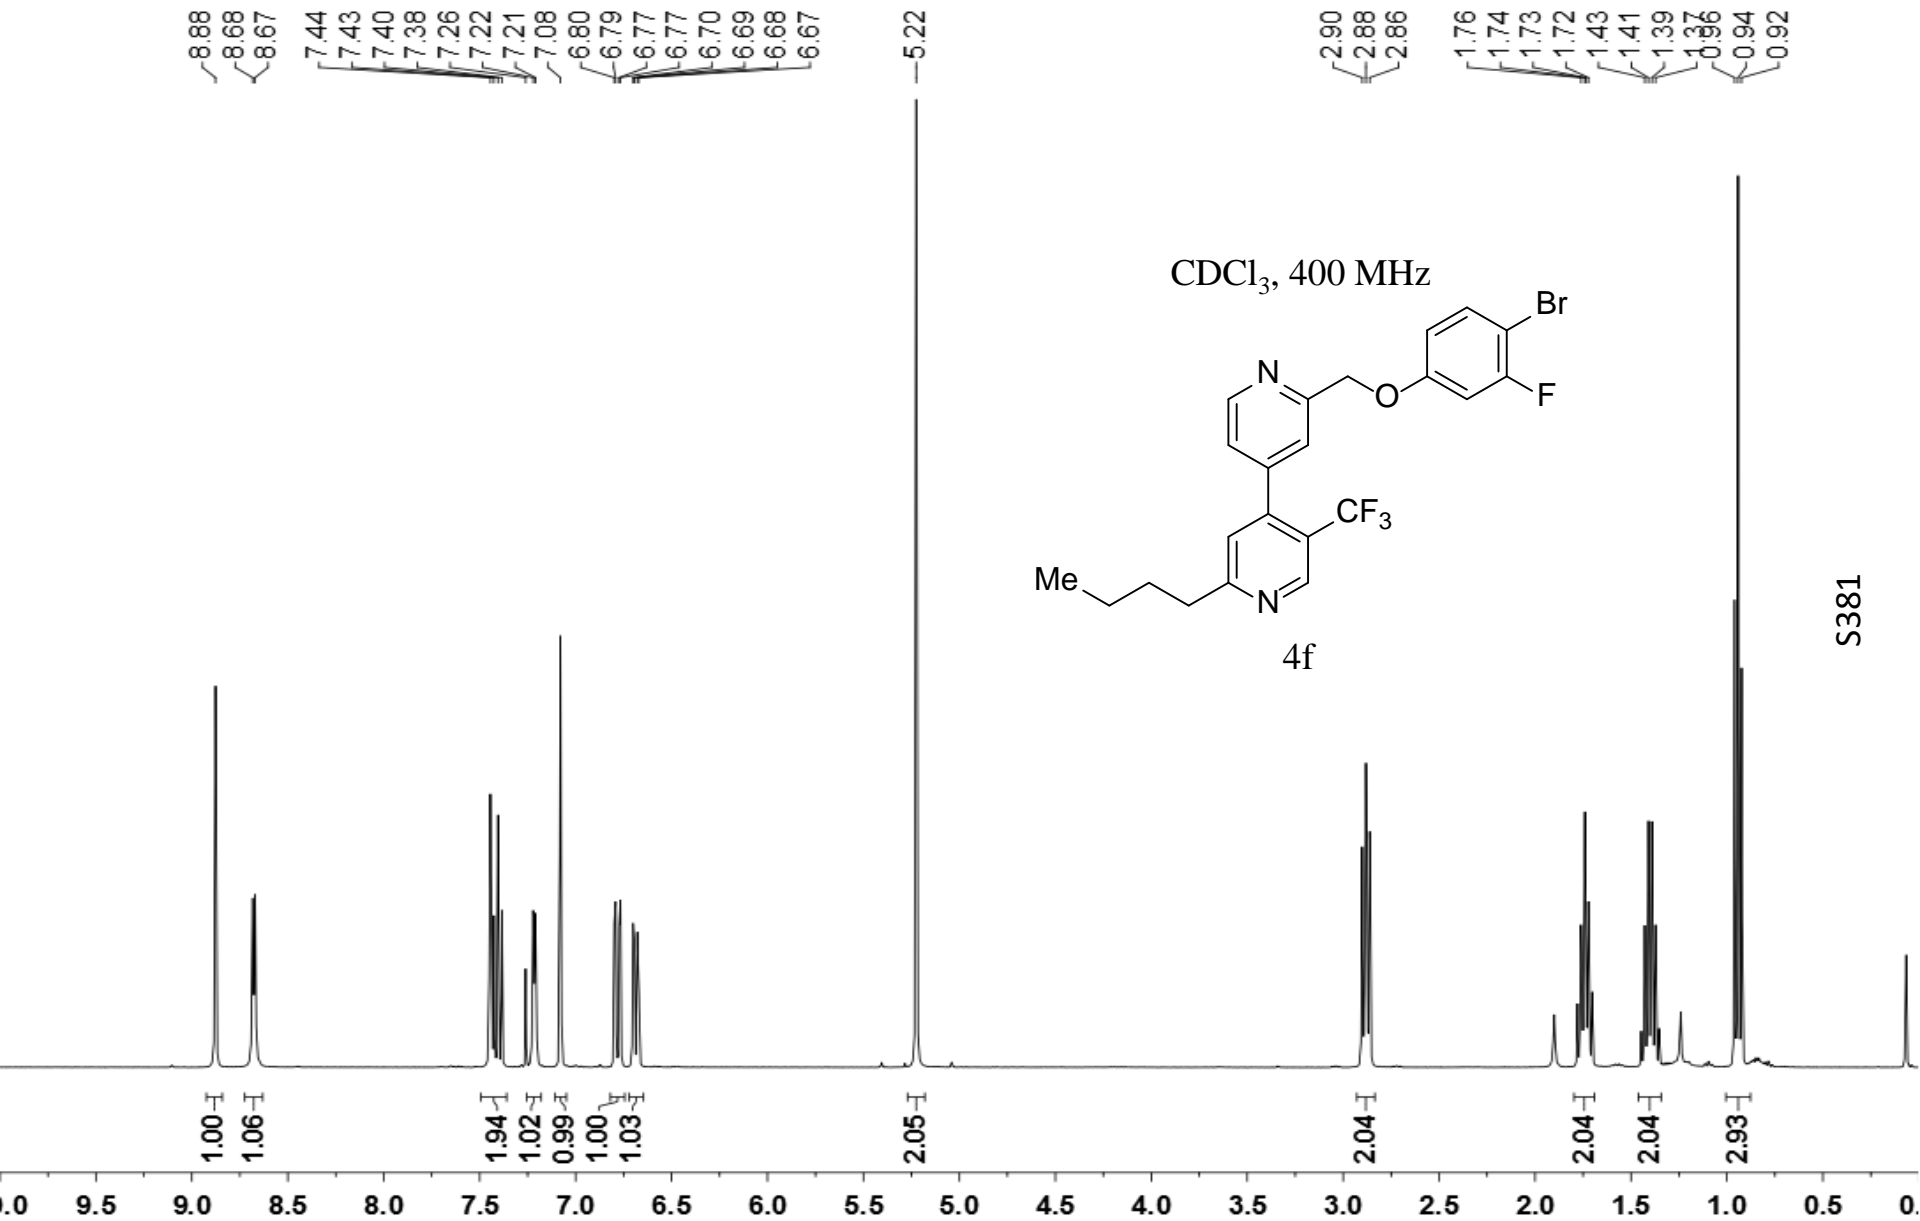

S381

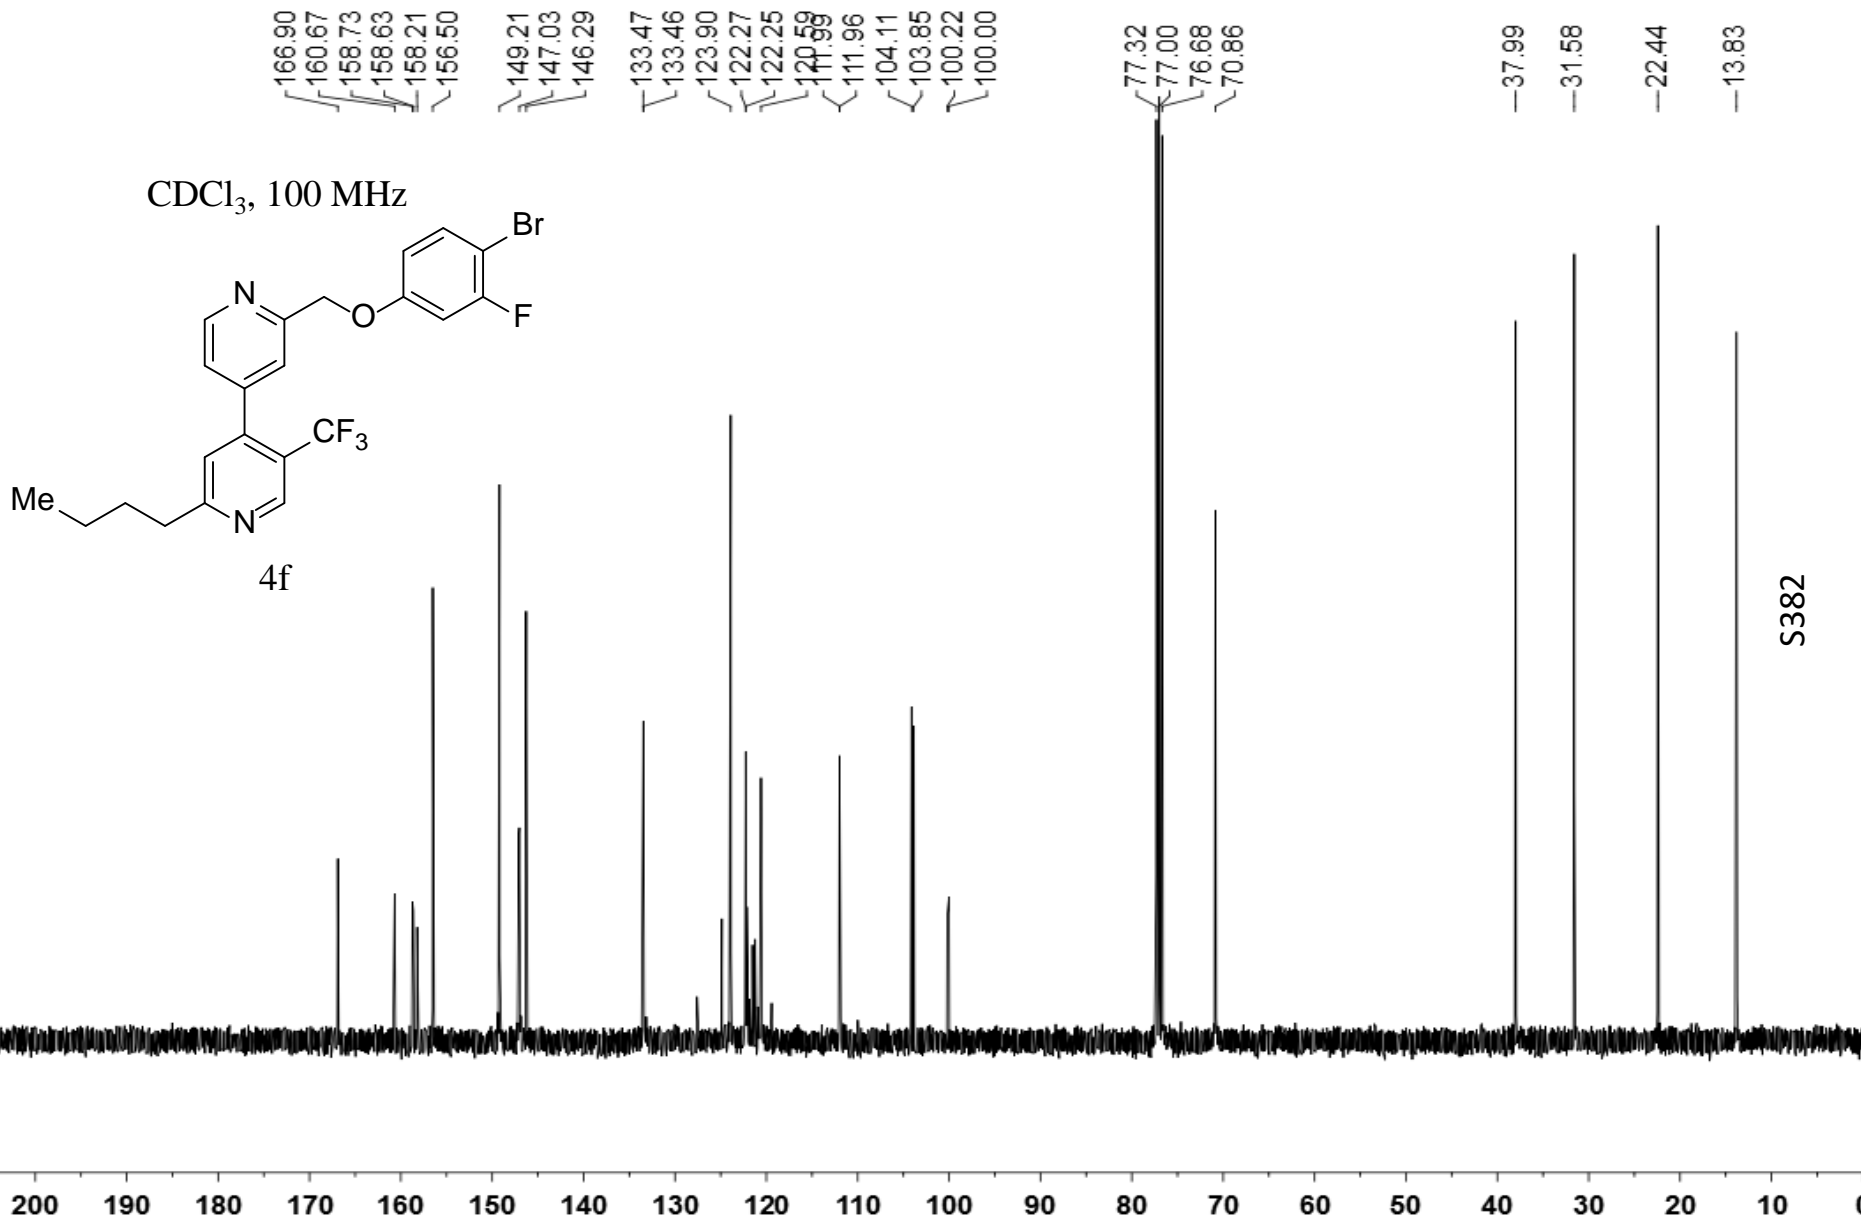

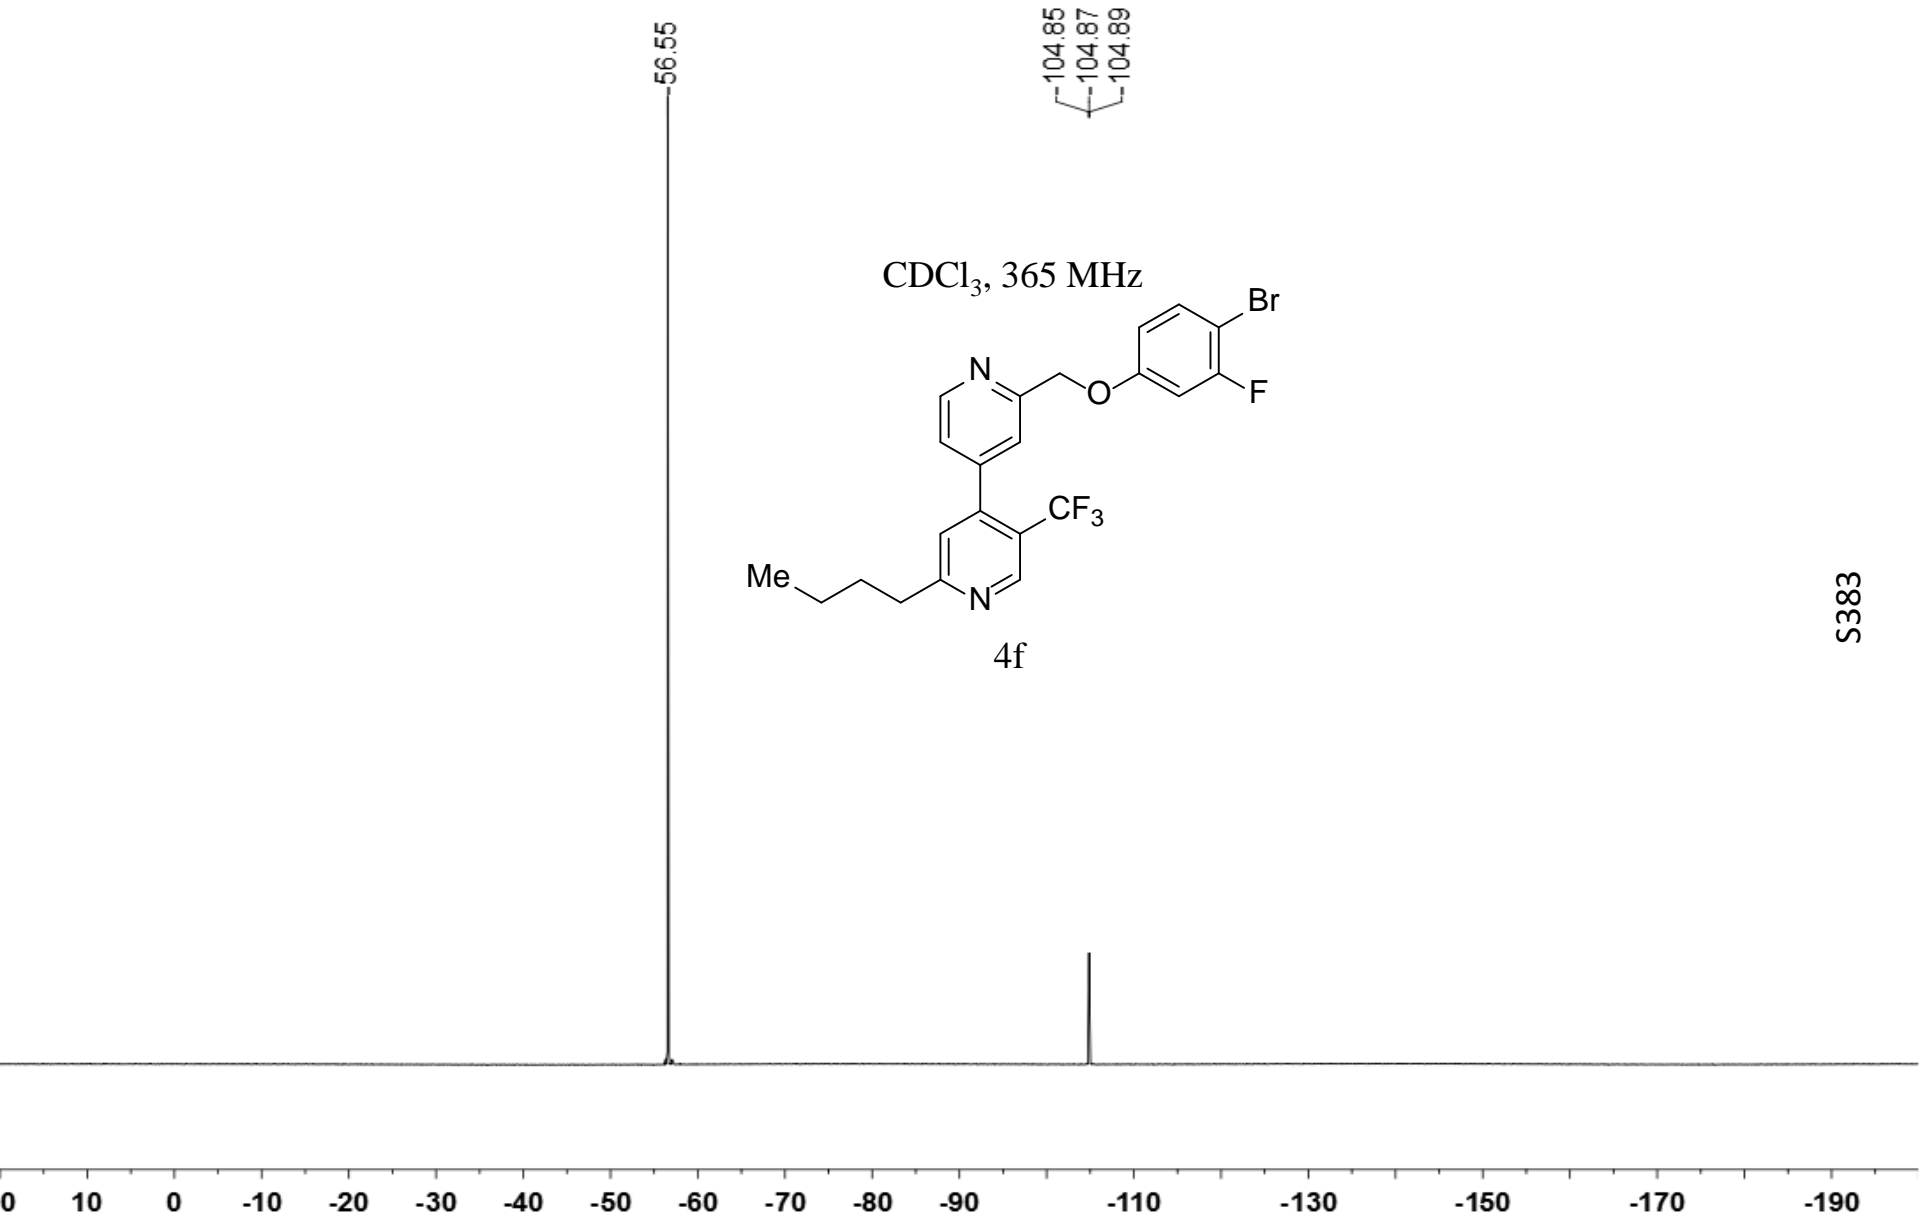

S383

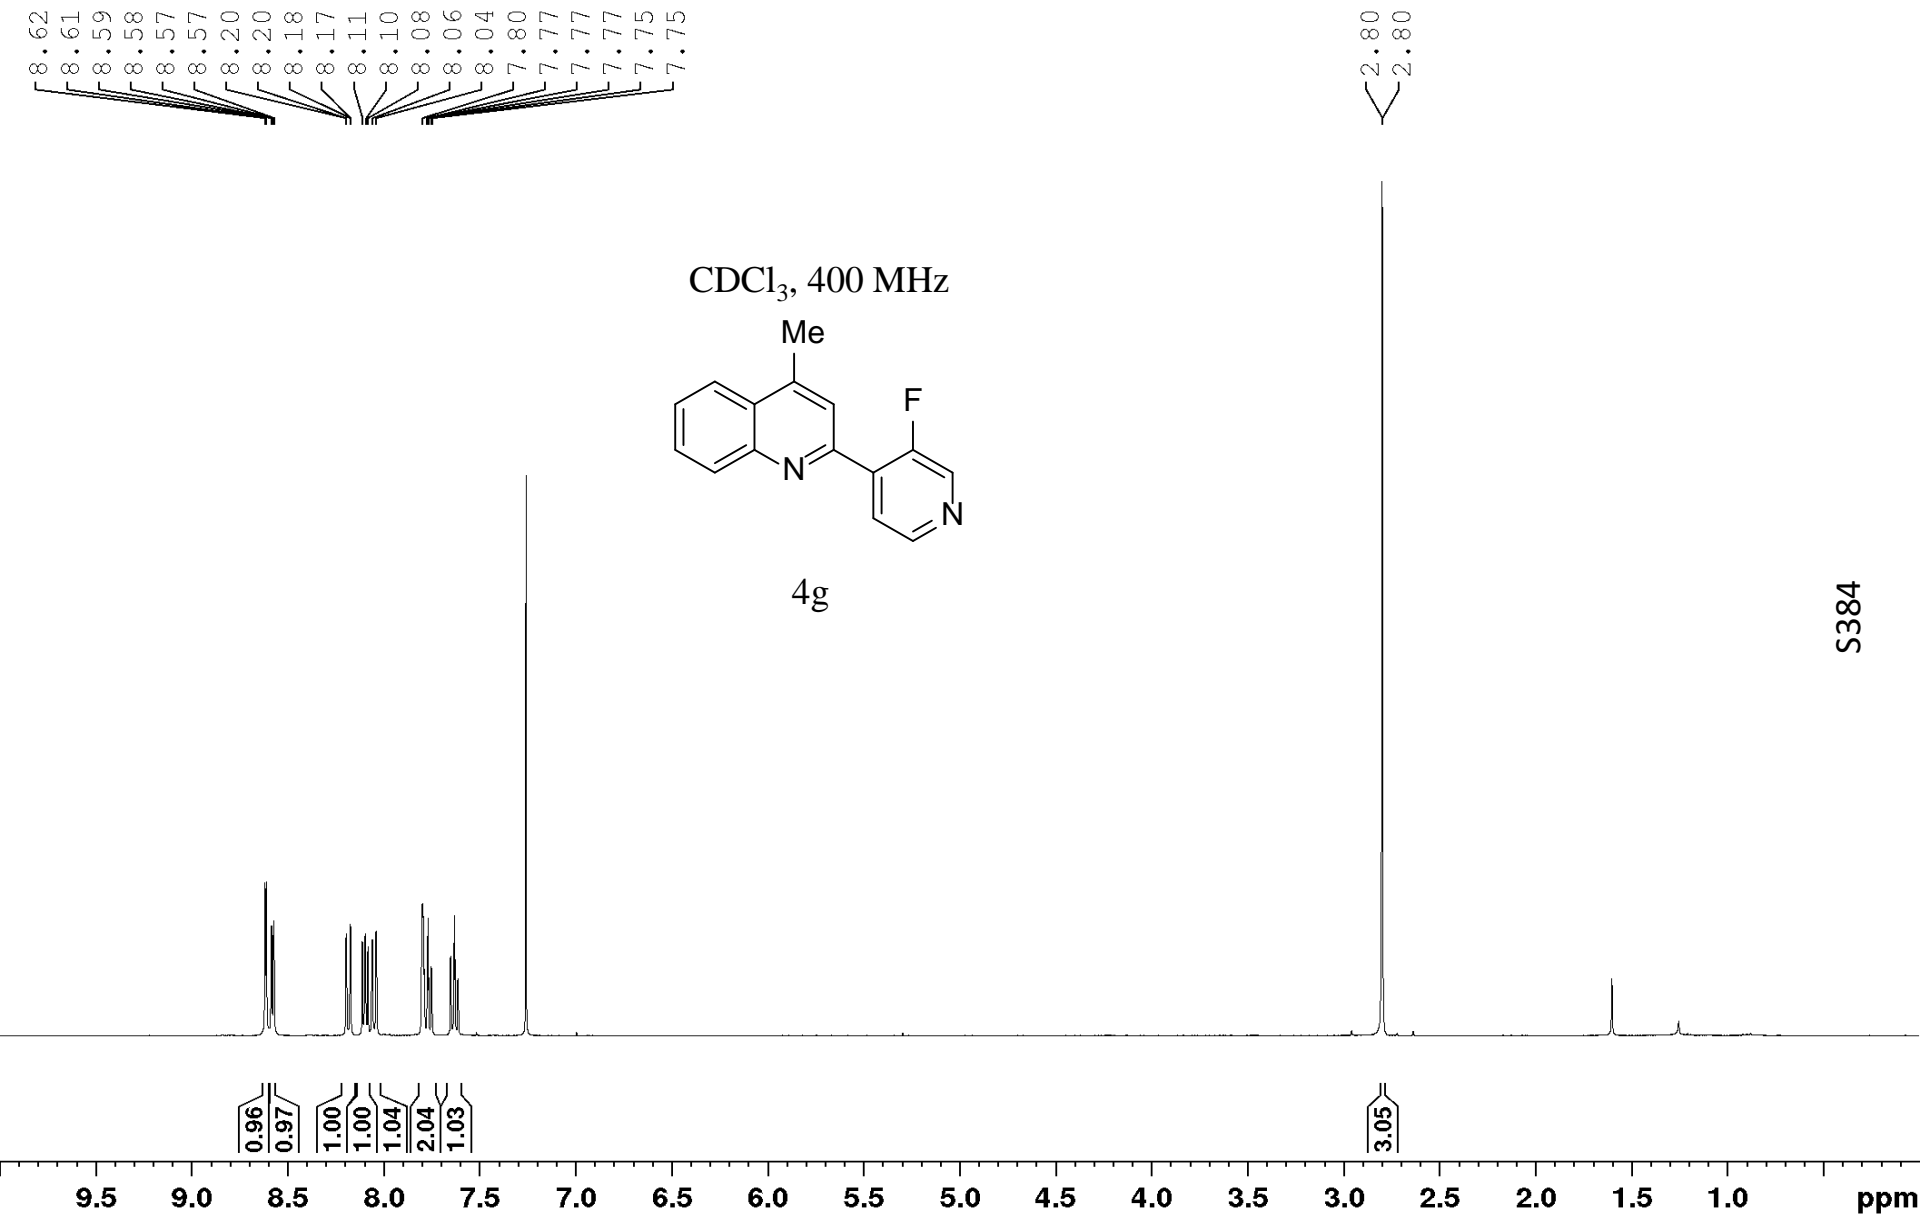



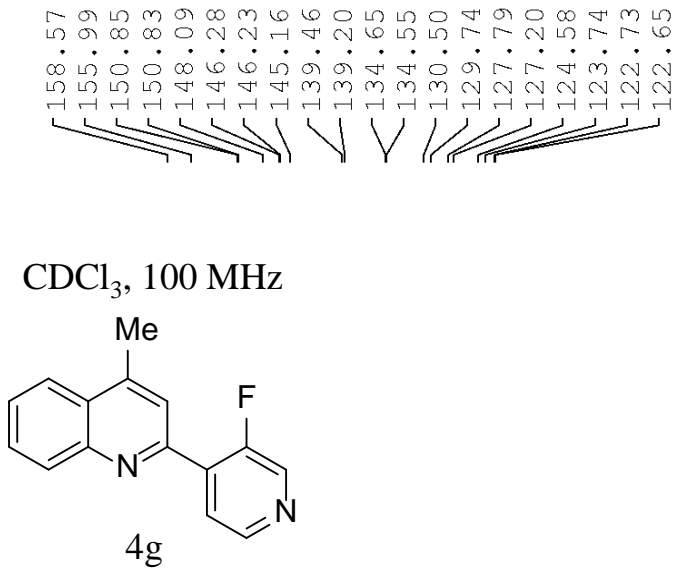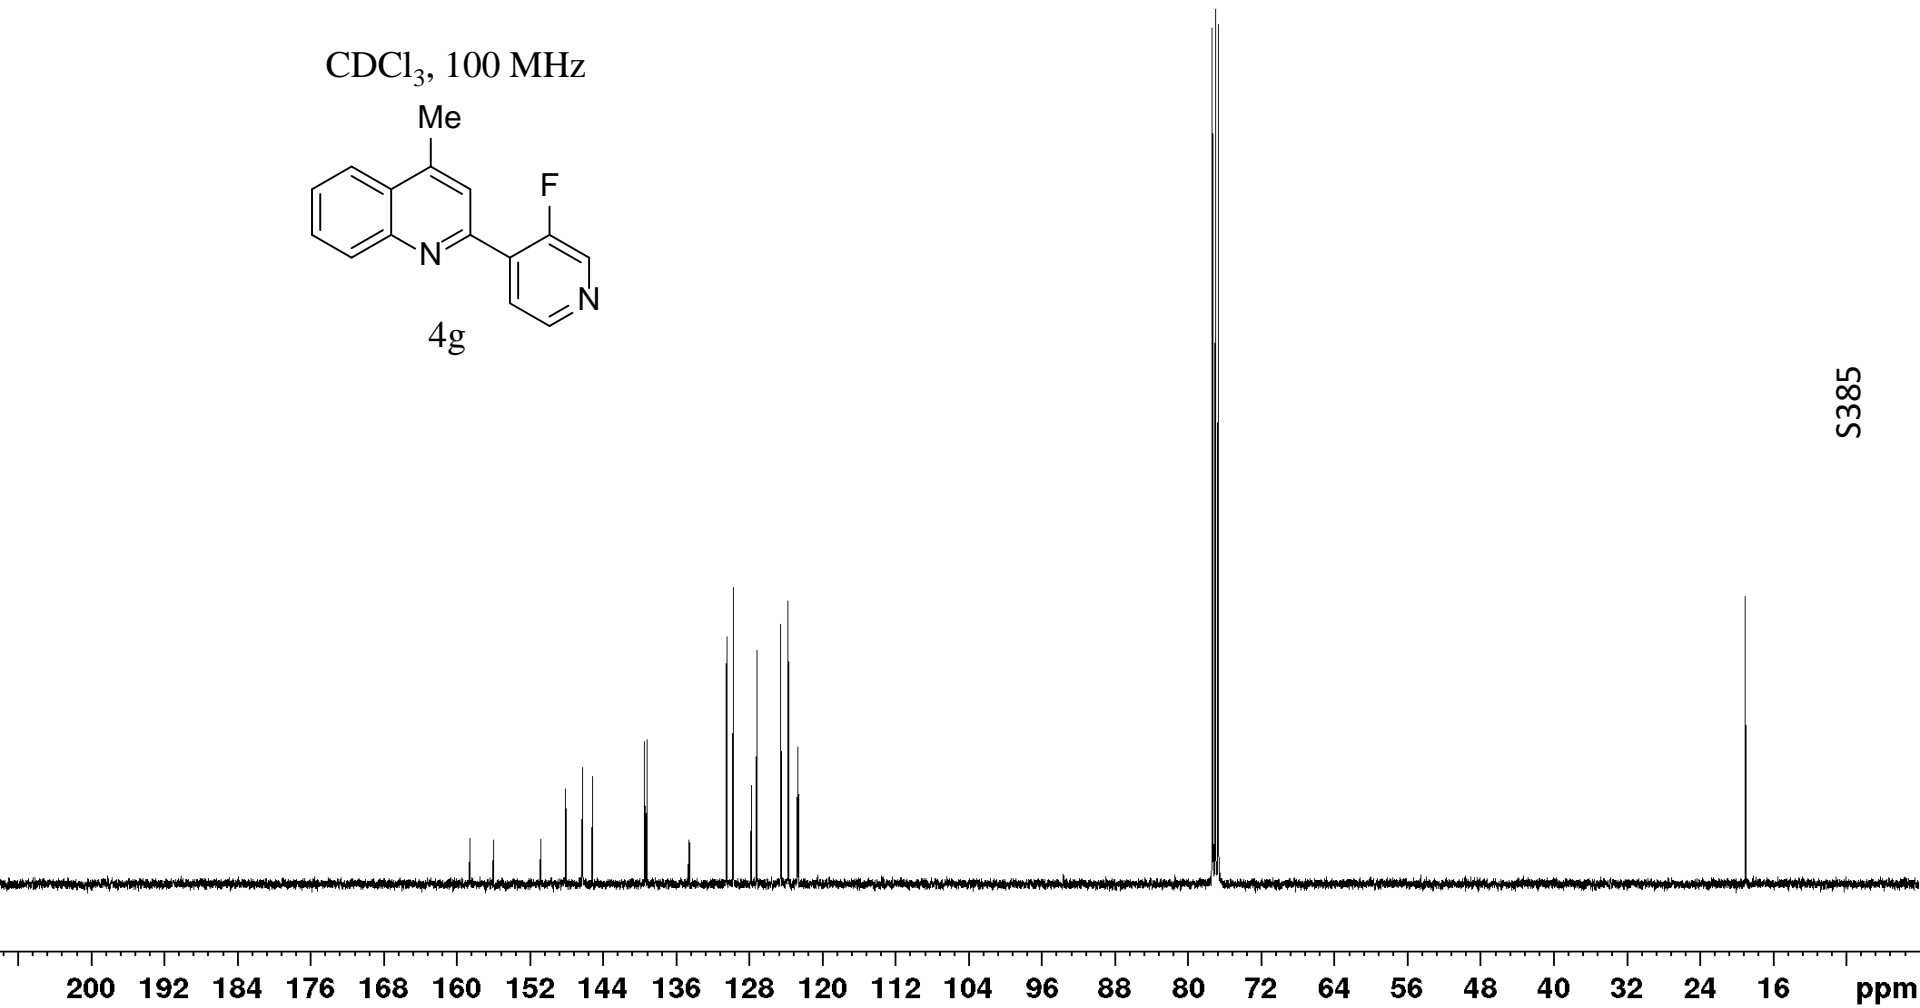

CDCl<sub>3</sub>, 365 MHz

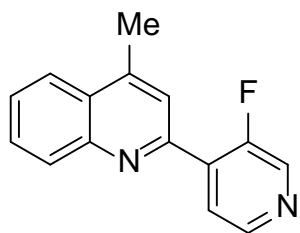

4g

<-131.61  
<-131.63

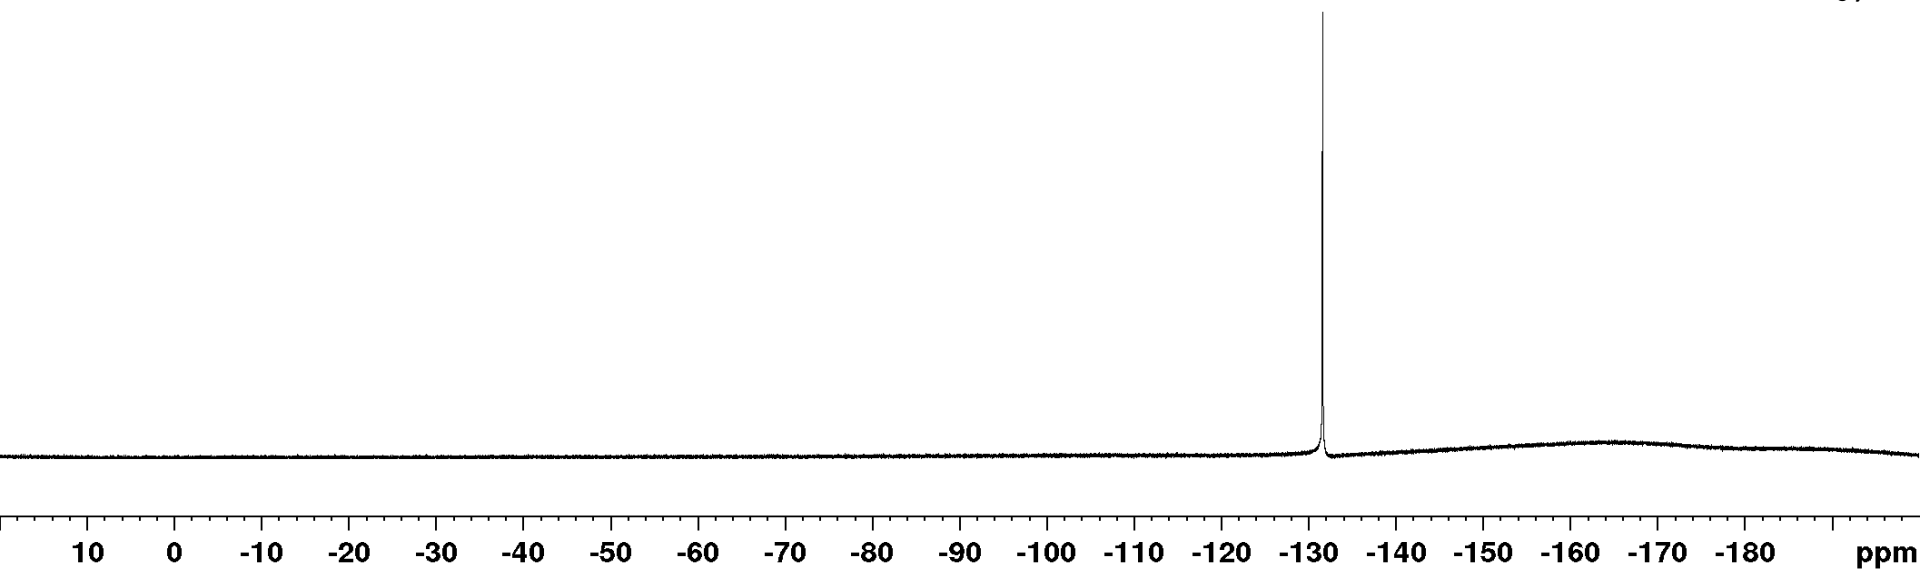

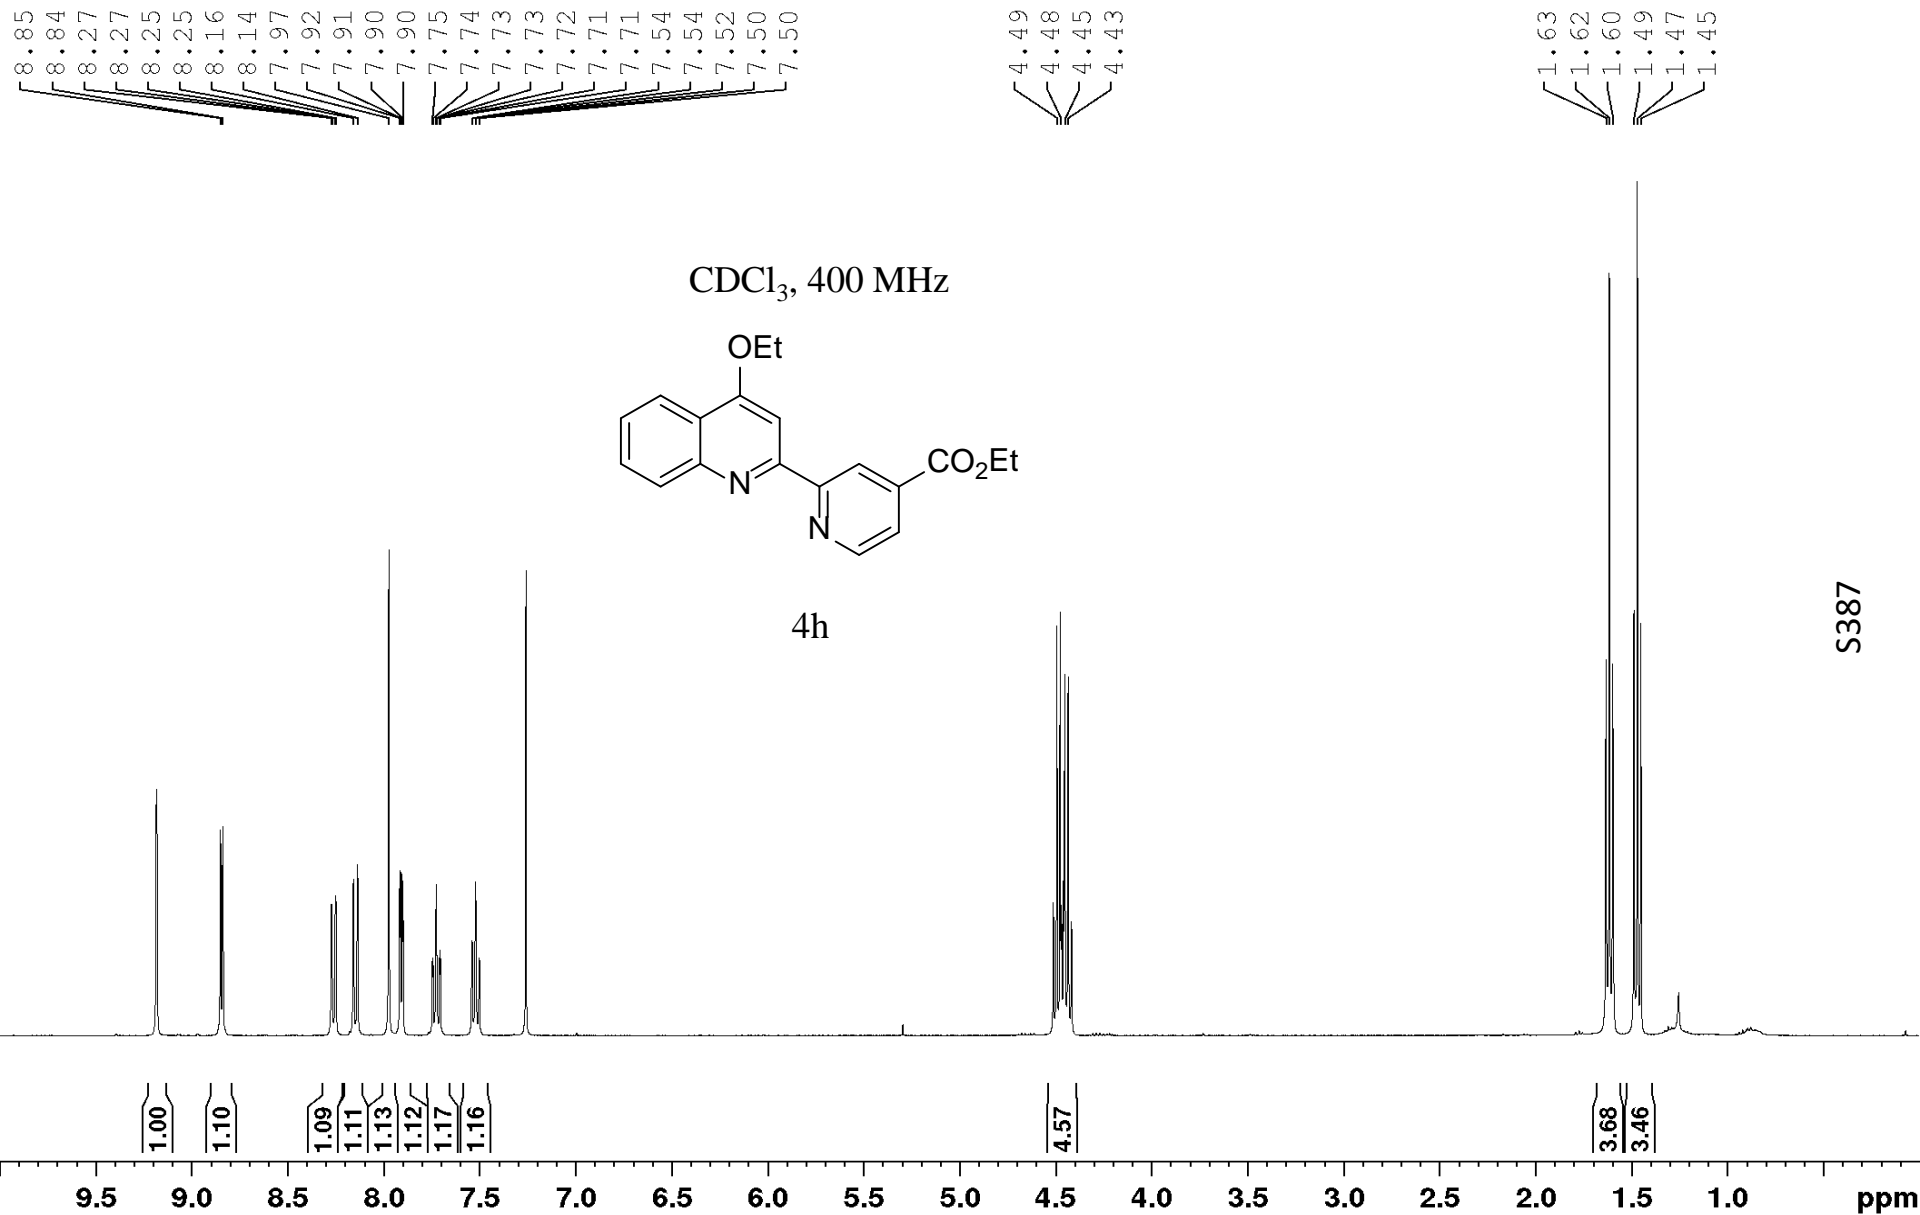

S387

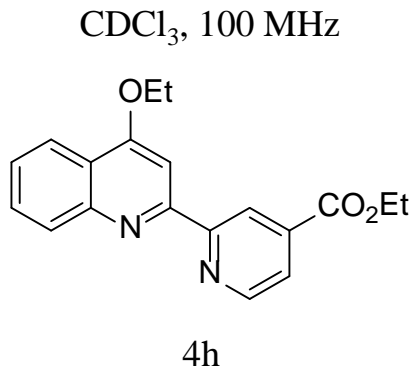

165.36  
162.43  
157.71  
156.56  
149.59  
148.98

138.80  
129.89  
129.35  
125.93  
123.05  
121.94  
121.54  
121.16

98.12

64.34  
61.83

14.55  
14.29

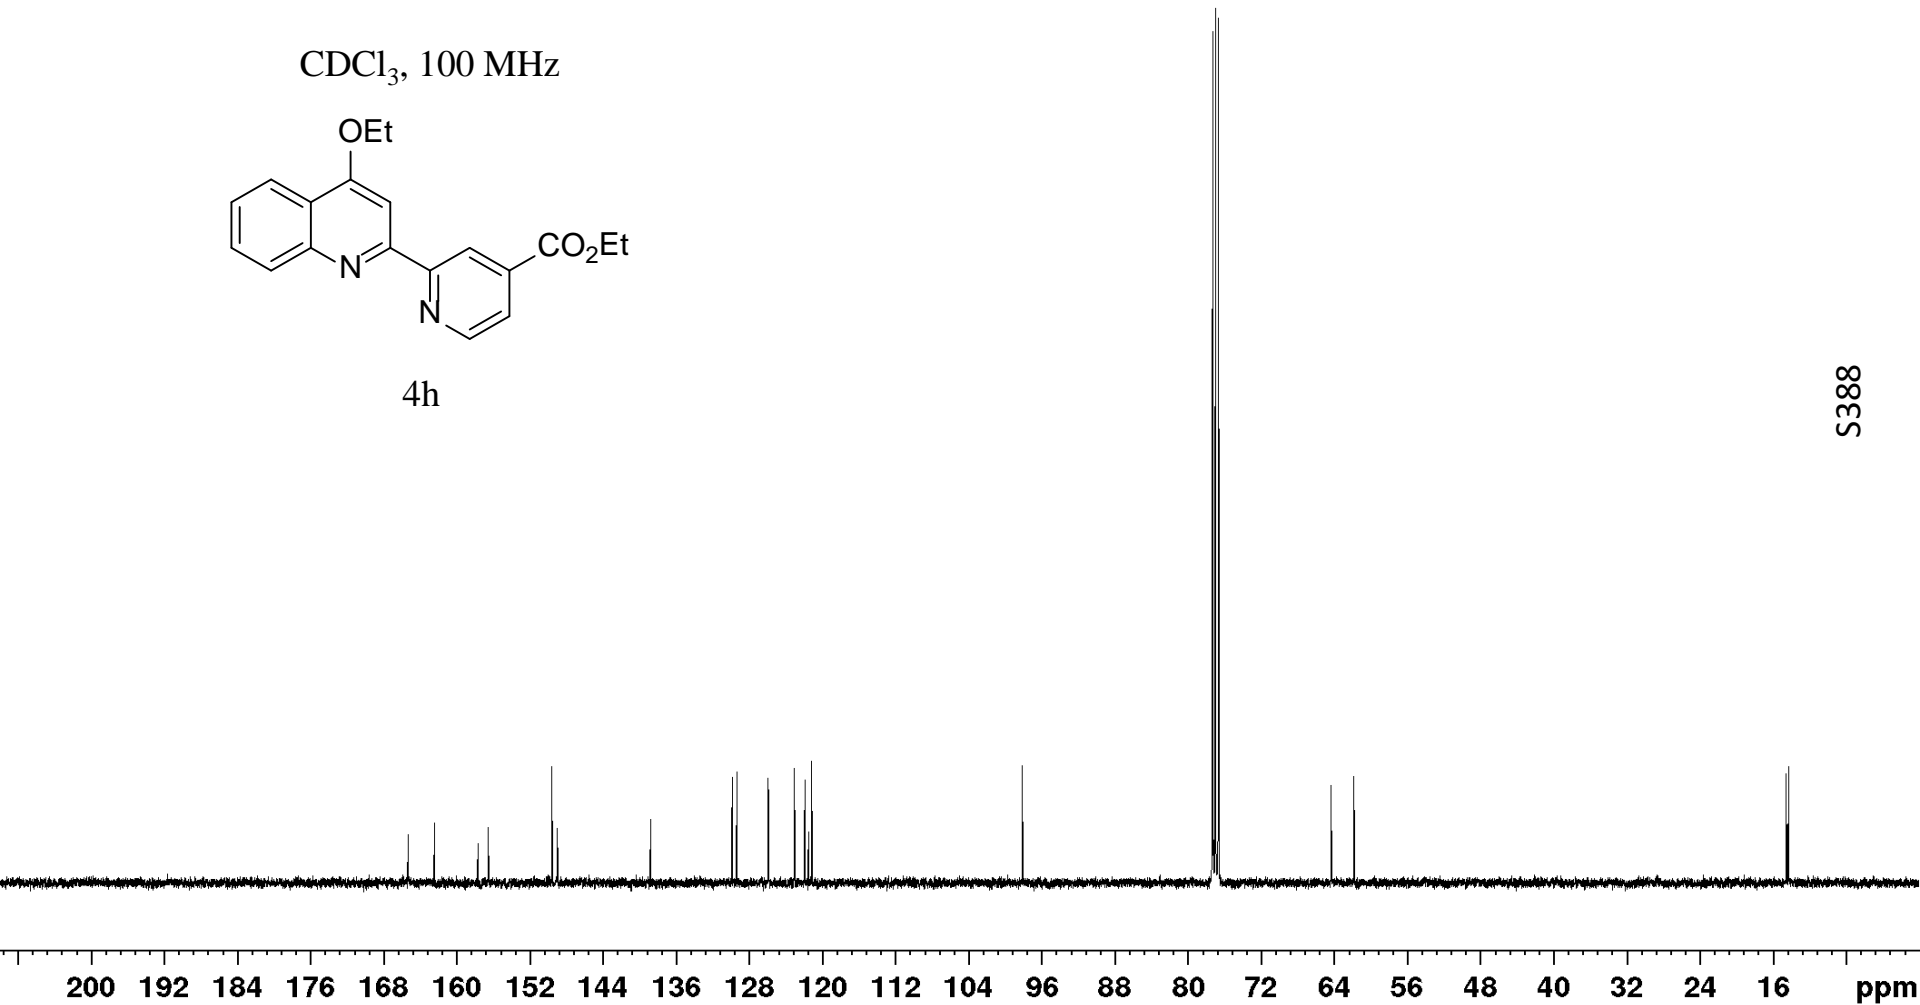

S388

8.60  
8.29  
8.27  
8.25  
8.25  
8.13  
8.09  
8.07  
8.04  
8.02  
7.69  
7.60  
7.59  
7.58  
7.57  
7.56  
7.54  
7.54  
7.50  
7.48  
7.46  
7.46  
7.44  
7.08  
7.07  
7.00

2.83  
2.83

CDCl<sub>3</sub>, 400 MHz

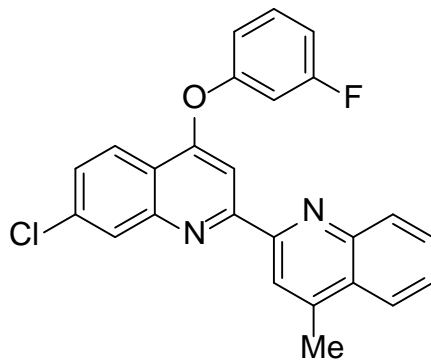

4i

S389

1.00  
1.05  
0.92  
0.96  
1.06  
1.05  
1.06  
2.05  
1.07

3.03

3.05

9.5 9.0 8.5 8.0 7.5 7.0 6.5 6.0 5.5 5.0 4.5 4.0 3.5 3.0 2.5 2.0 1.5 1.0 ppm

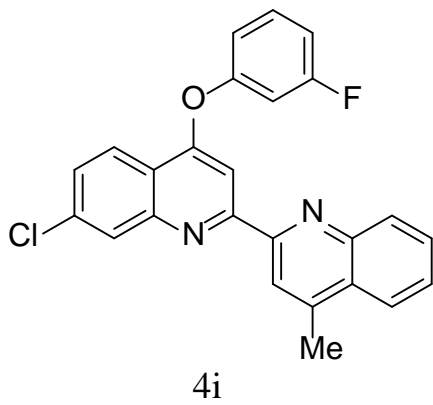

CDCl<sub>3</sub>, 100 MHz

- 164.84
- 162.37
- 161.43
- 158.99
- 155.81
- 155.70
- 154.93
- 150.04
- 147.57
- 145.07
- 136.33
- 131.15
- 131.05
- 130.50
- 129.22
- 128.57
- 128.54
- 127.50
- 126.90
- 123.75
- 123.26
- 120.13
- 119.70
- 116.34
- 116.30
- 112.55
- 112.34
- 108.77
- 108.53
- 103.43

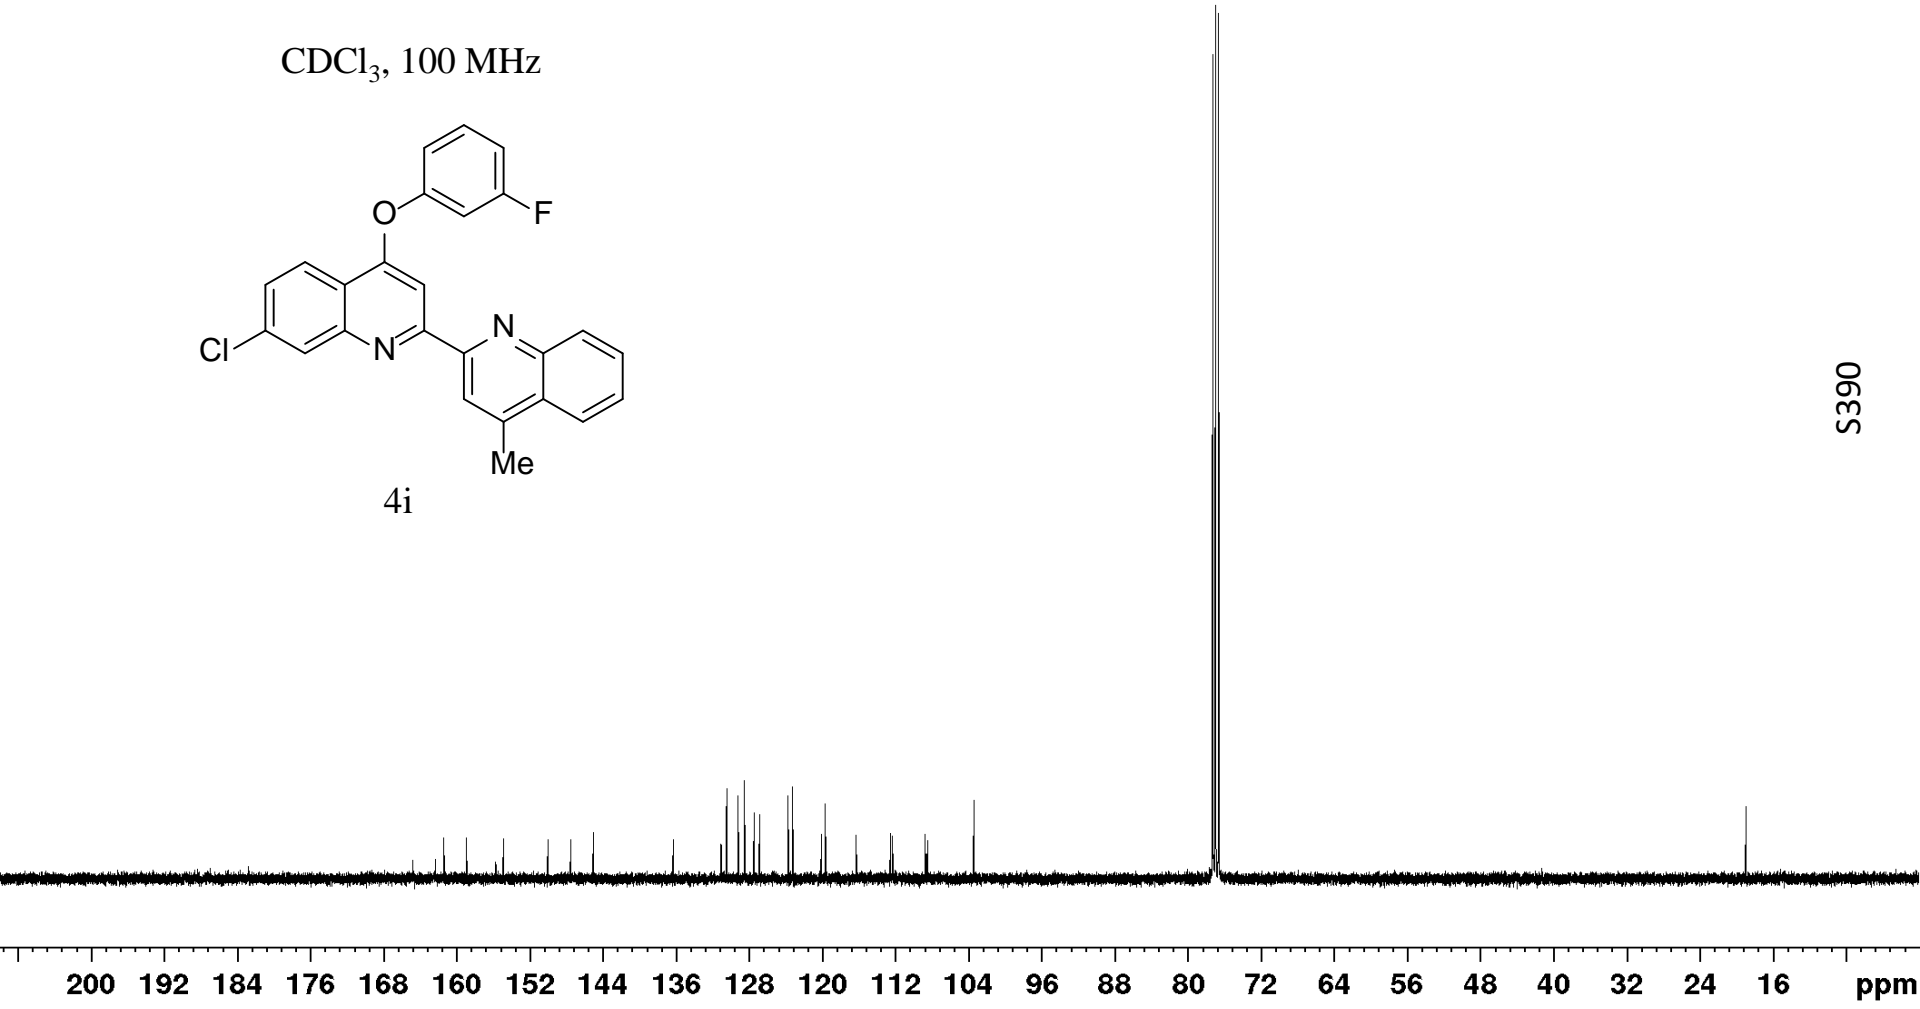

— 18.95

S390

-109.72  
-109.74  
-109.74  
-109.76  
-109.77  
-109.79

CDCl<sub>3</sub>, 365 MHz

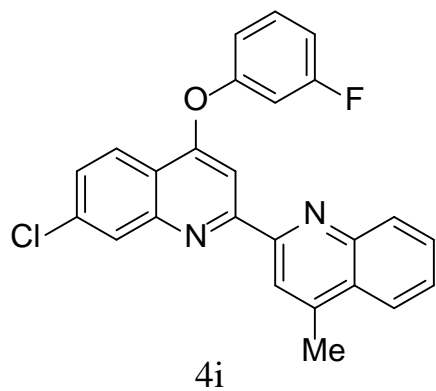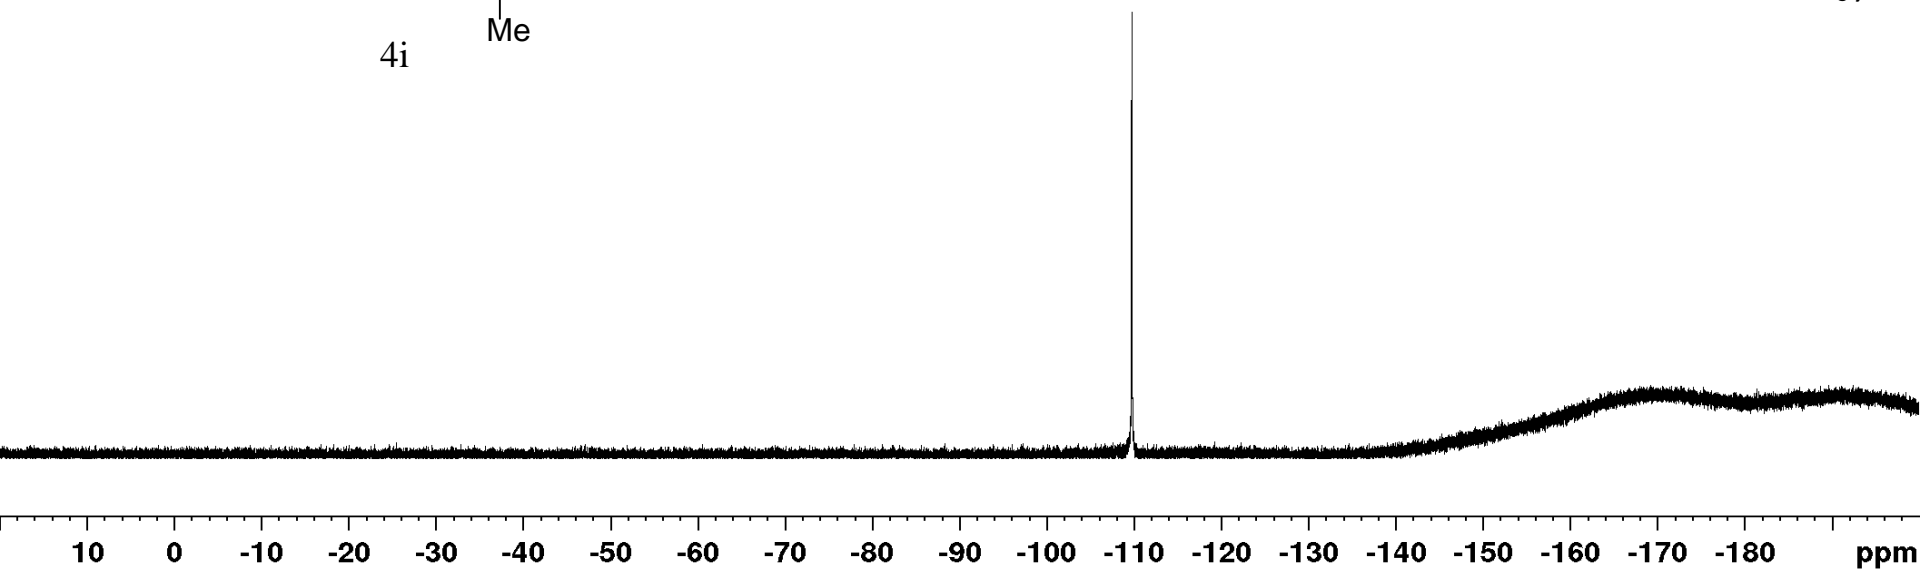

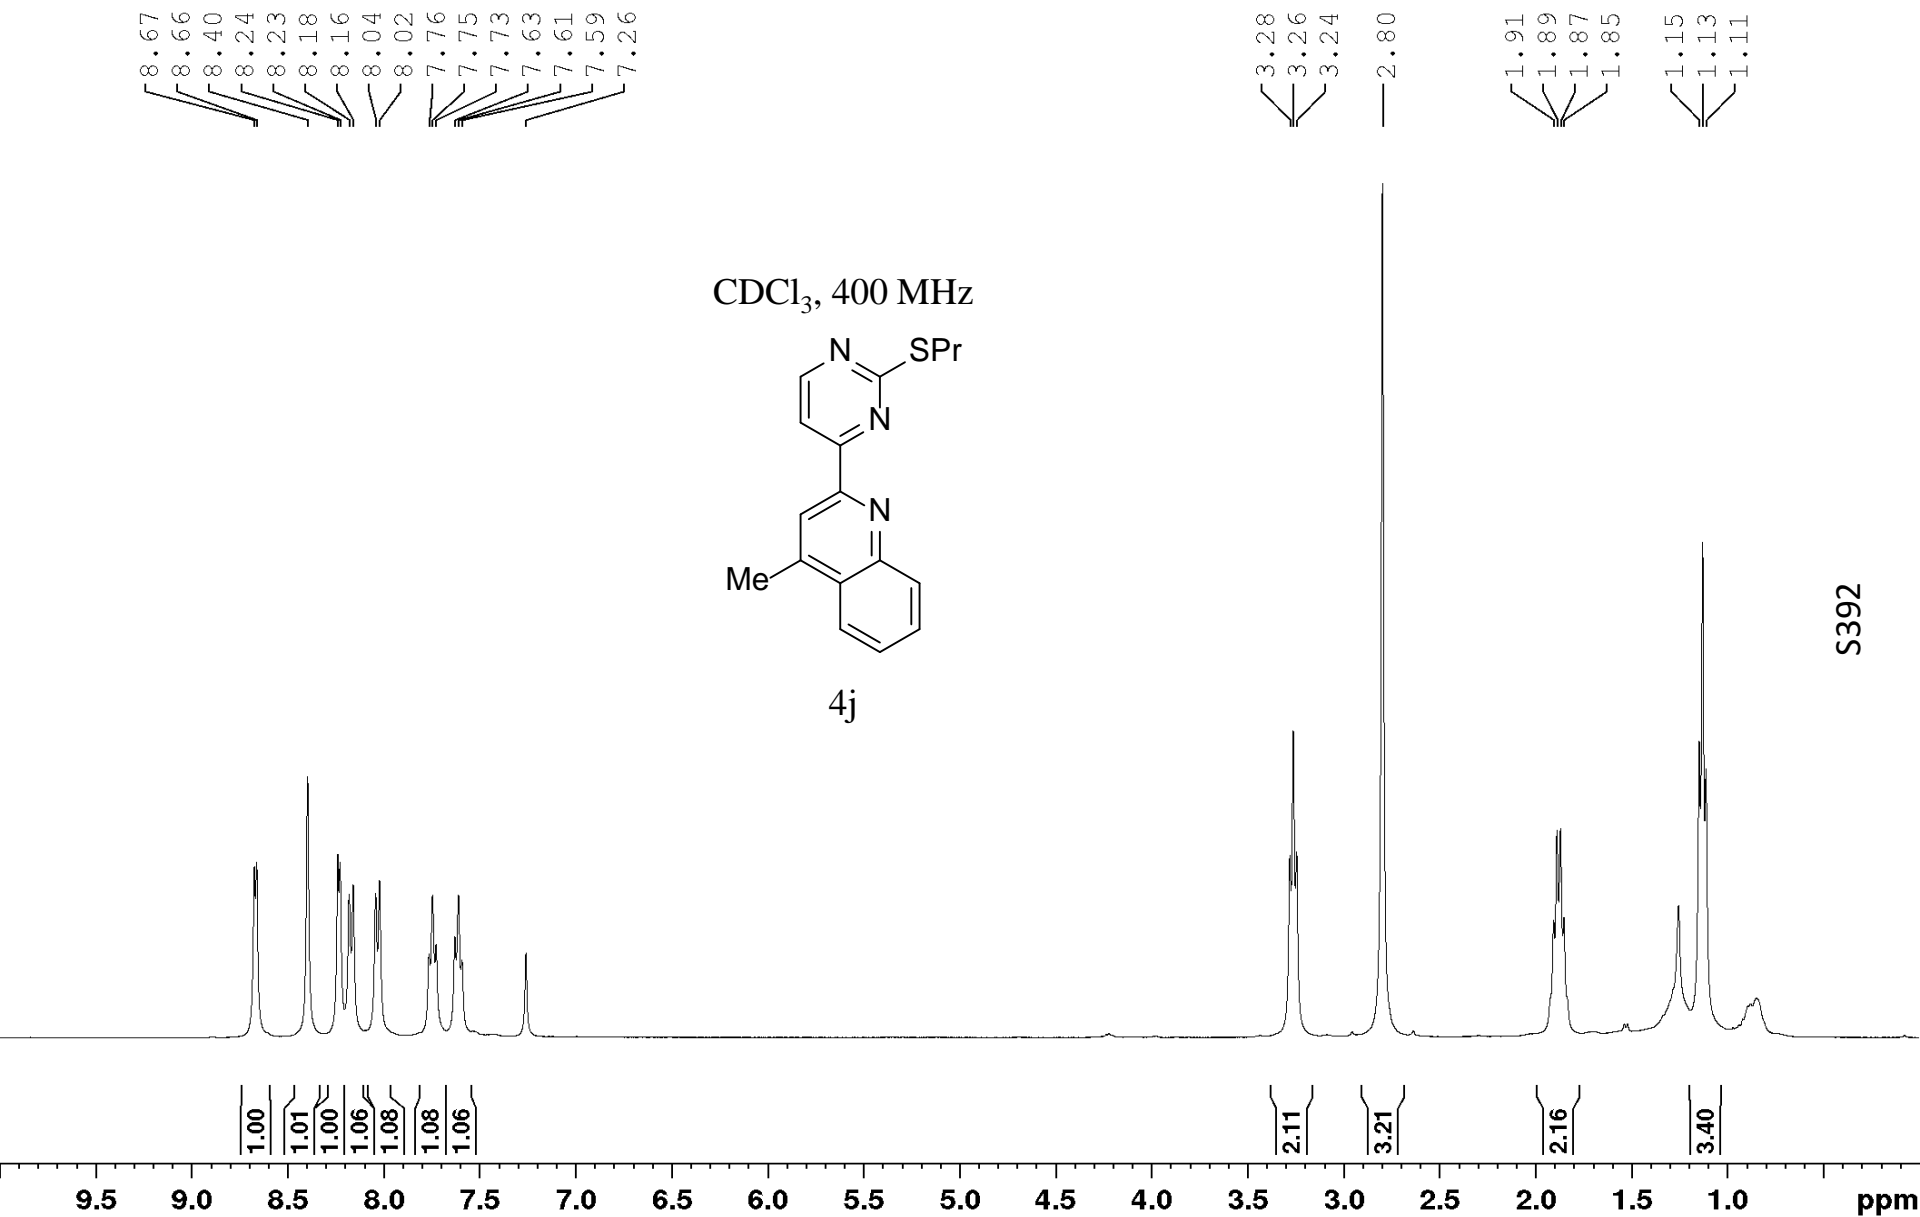



CDCl<sub>3</sub>, 100 MHz

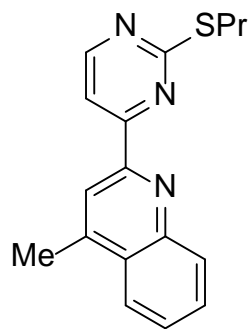

4j

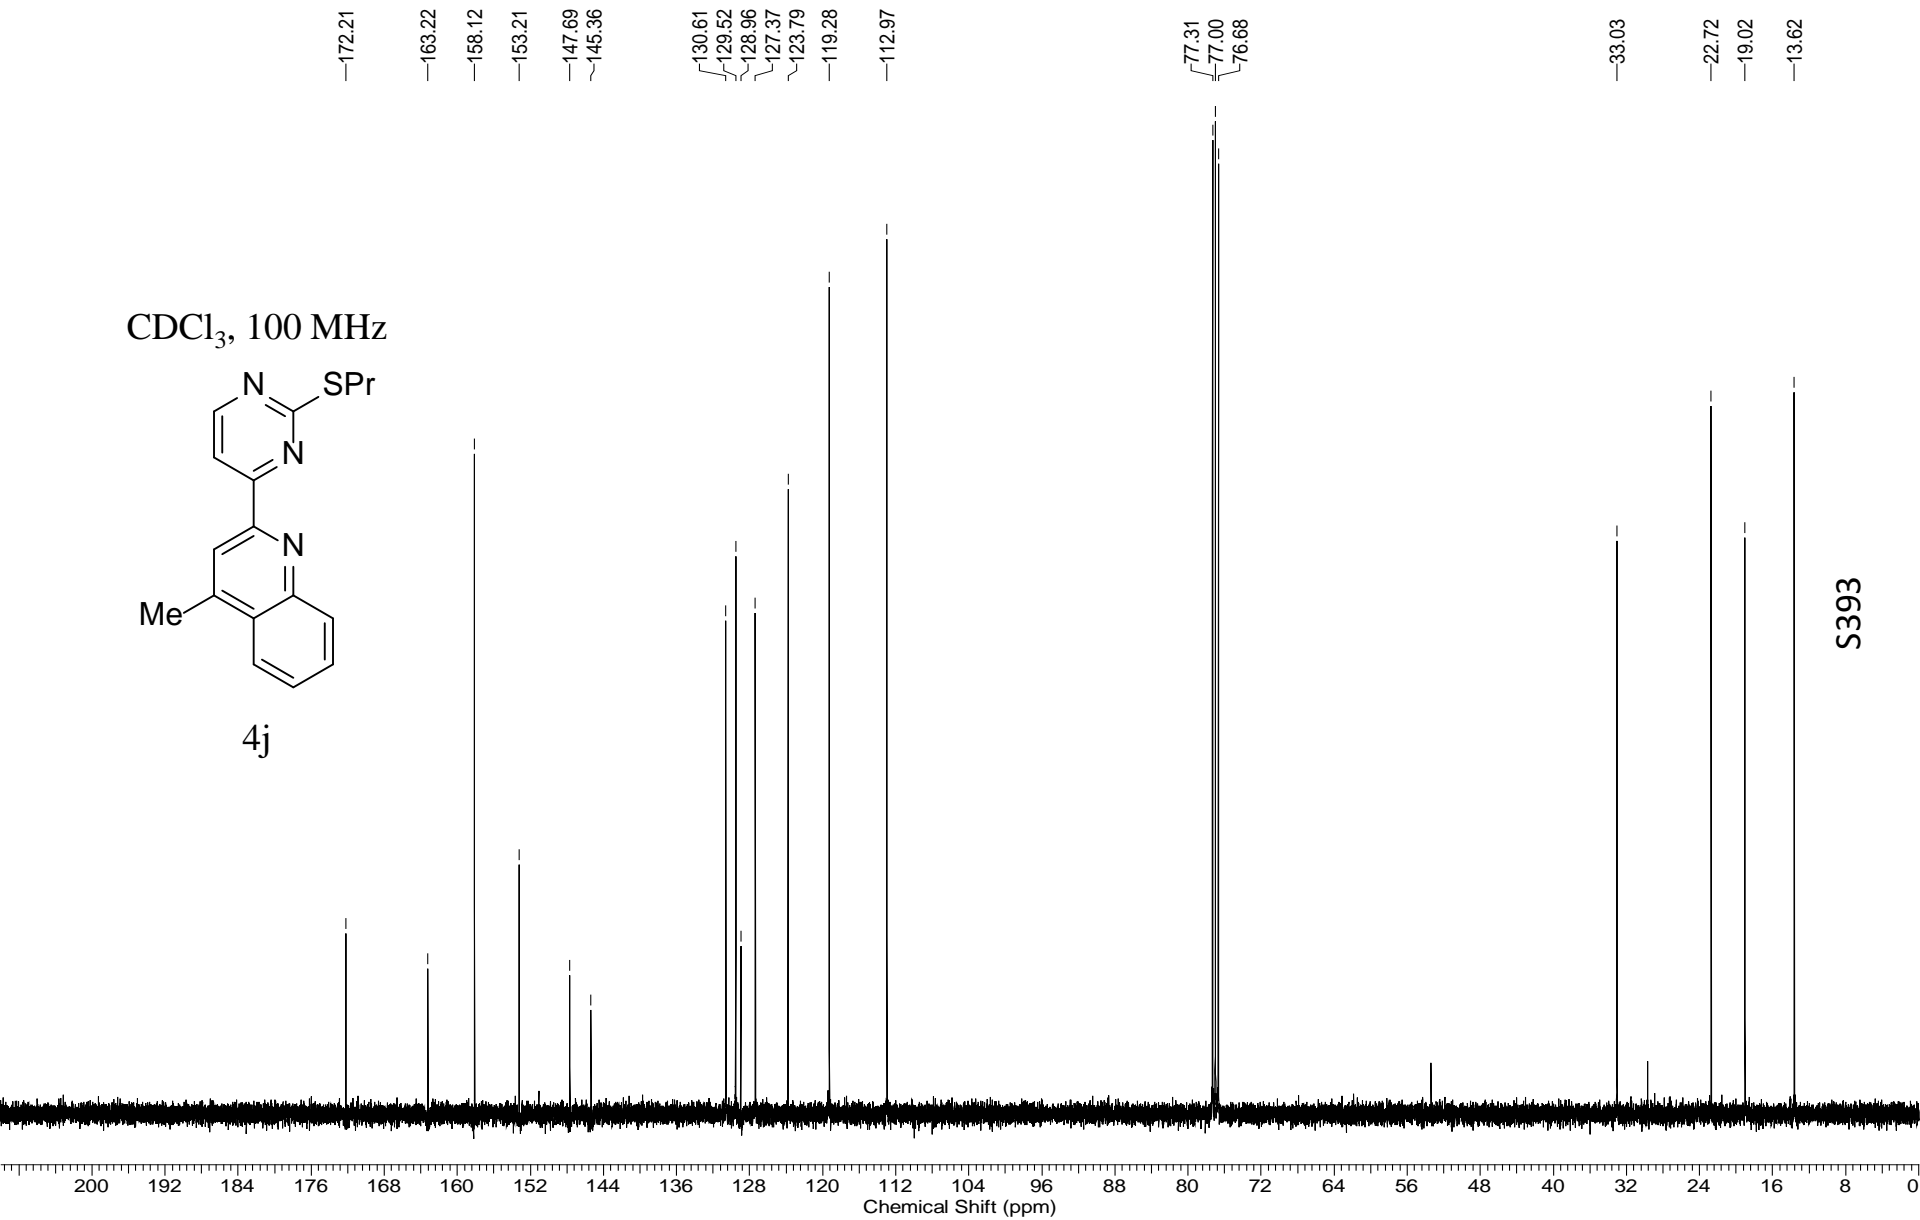

S393

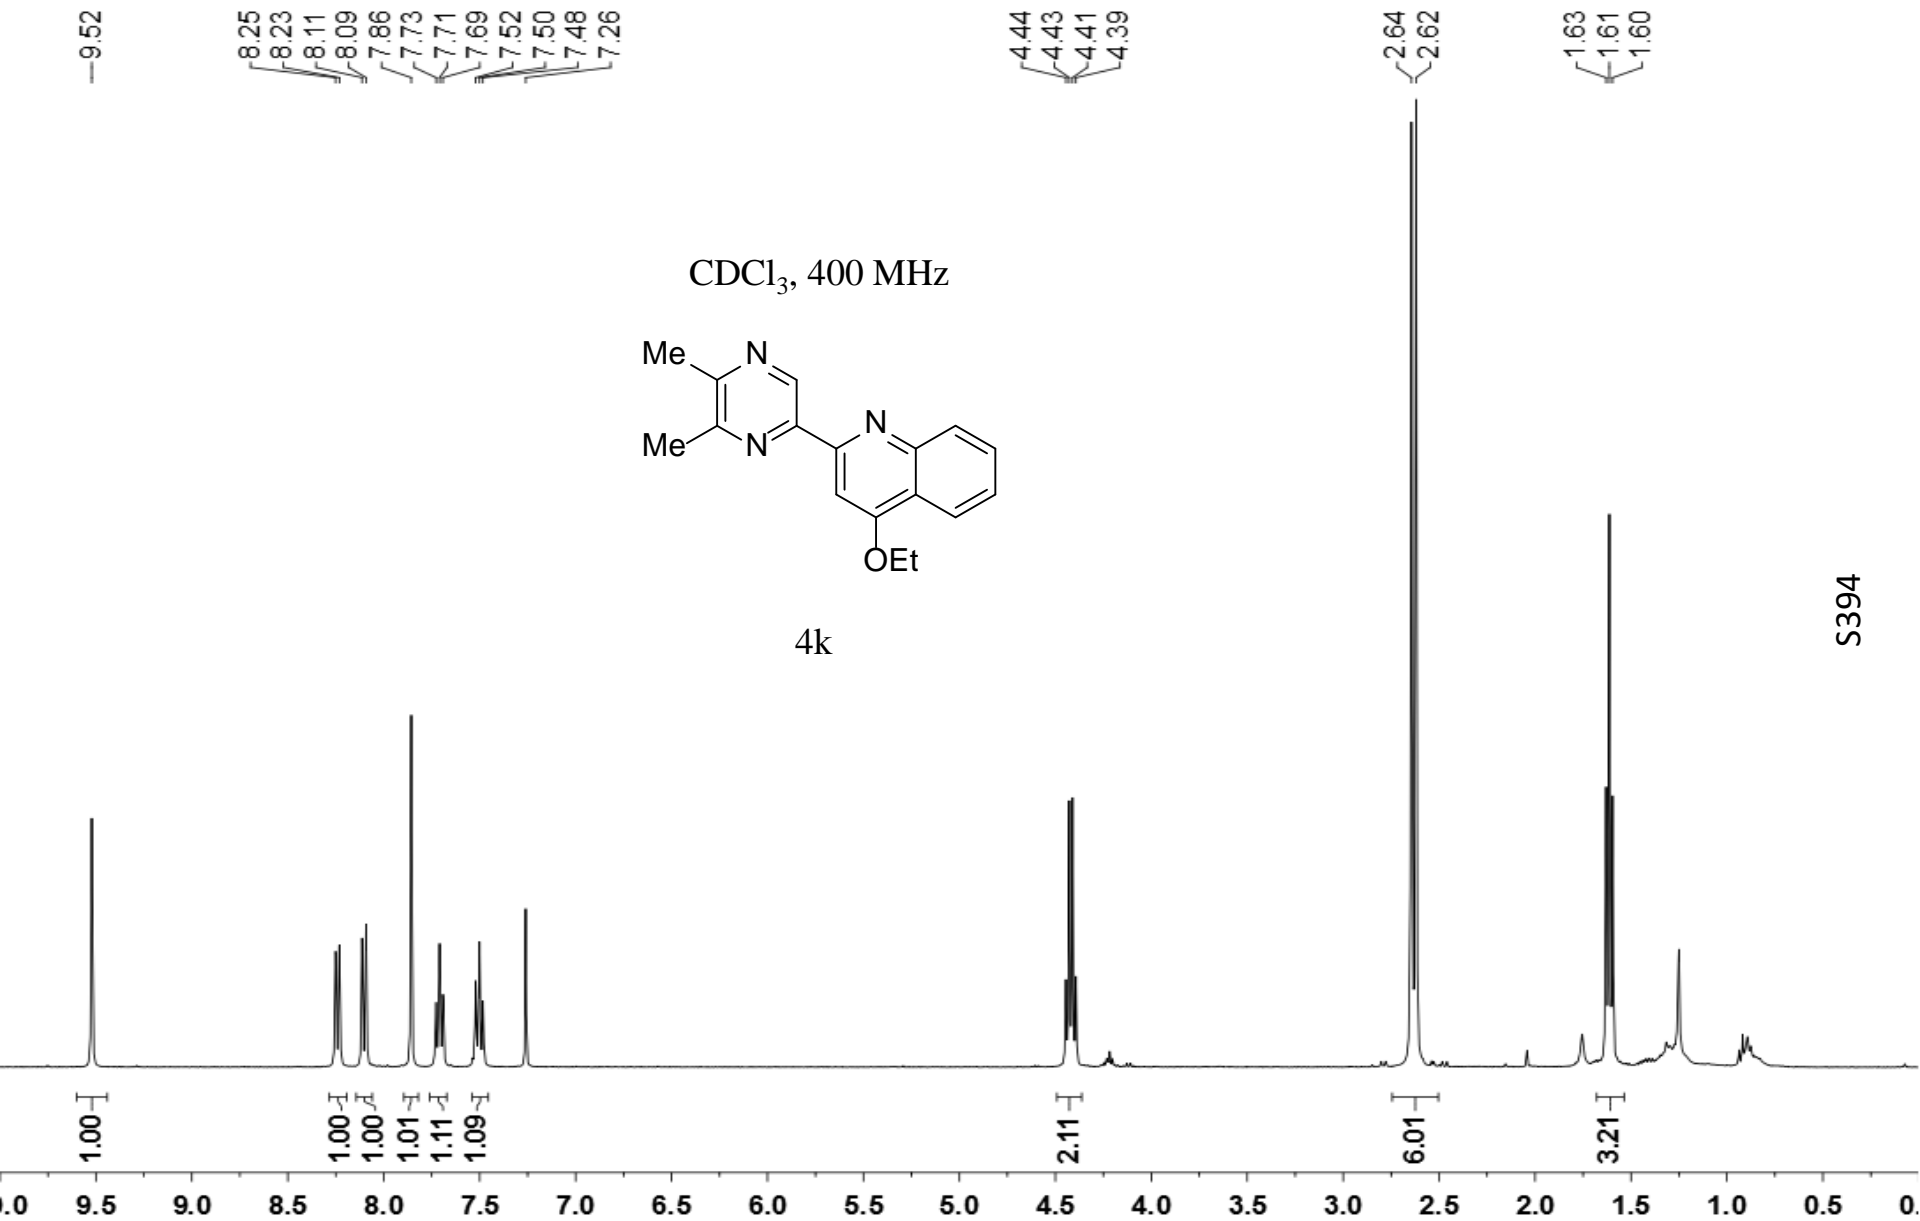

S394

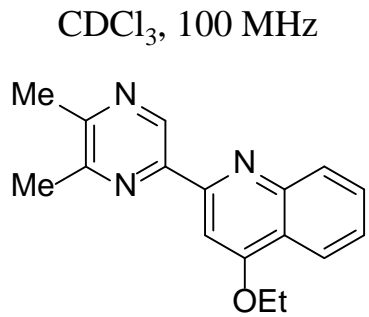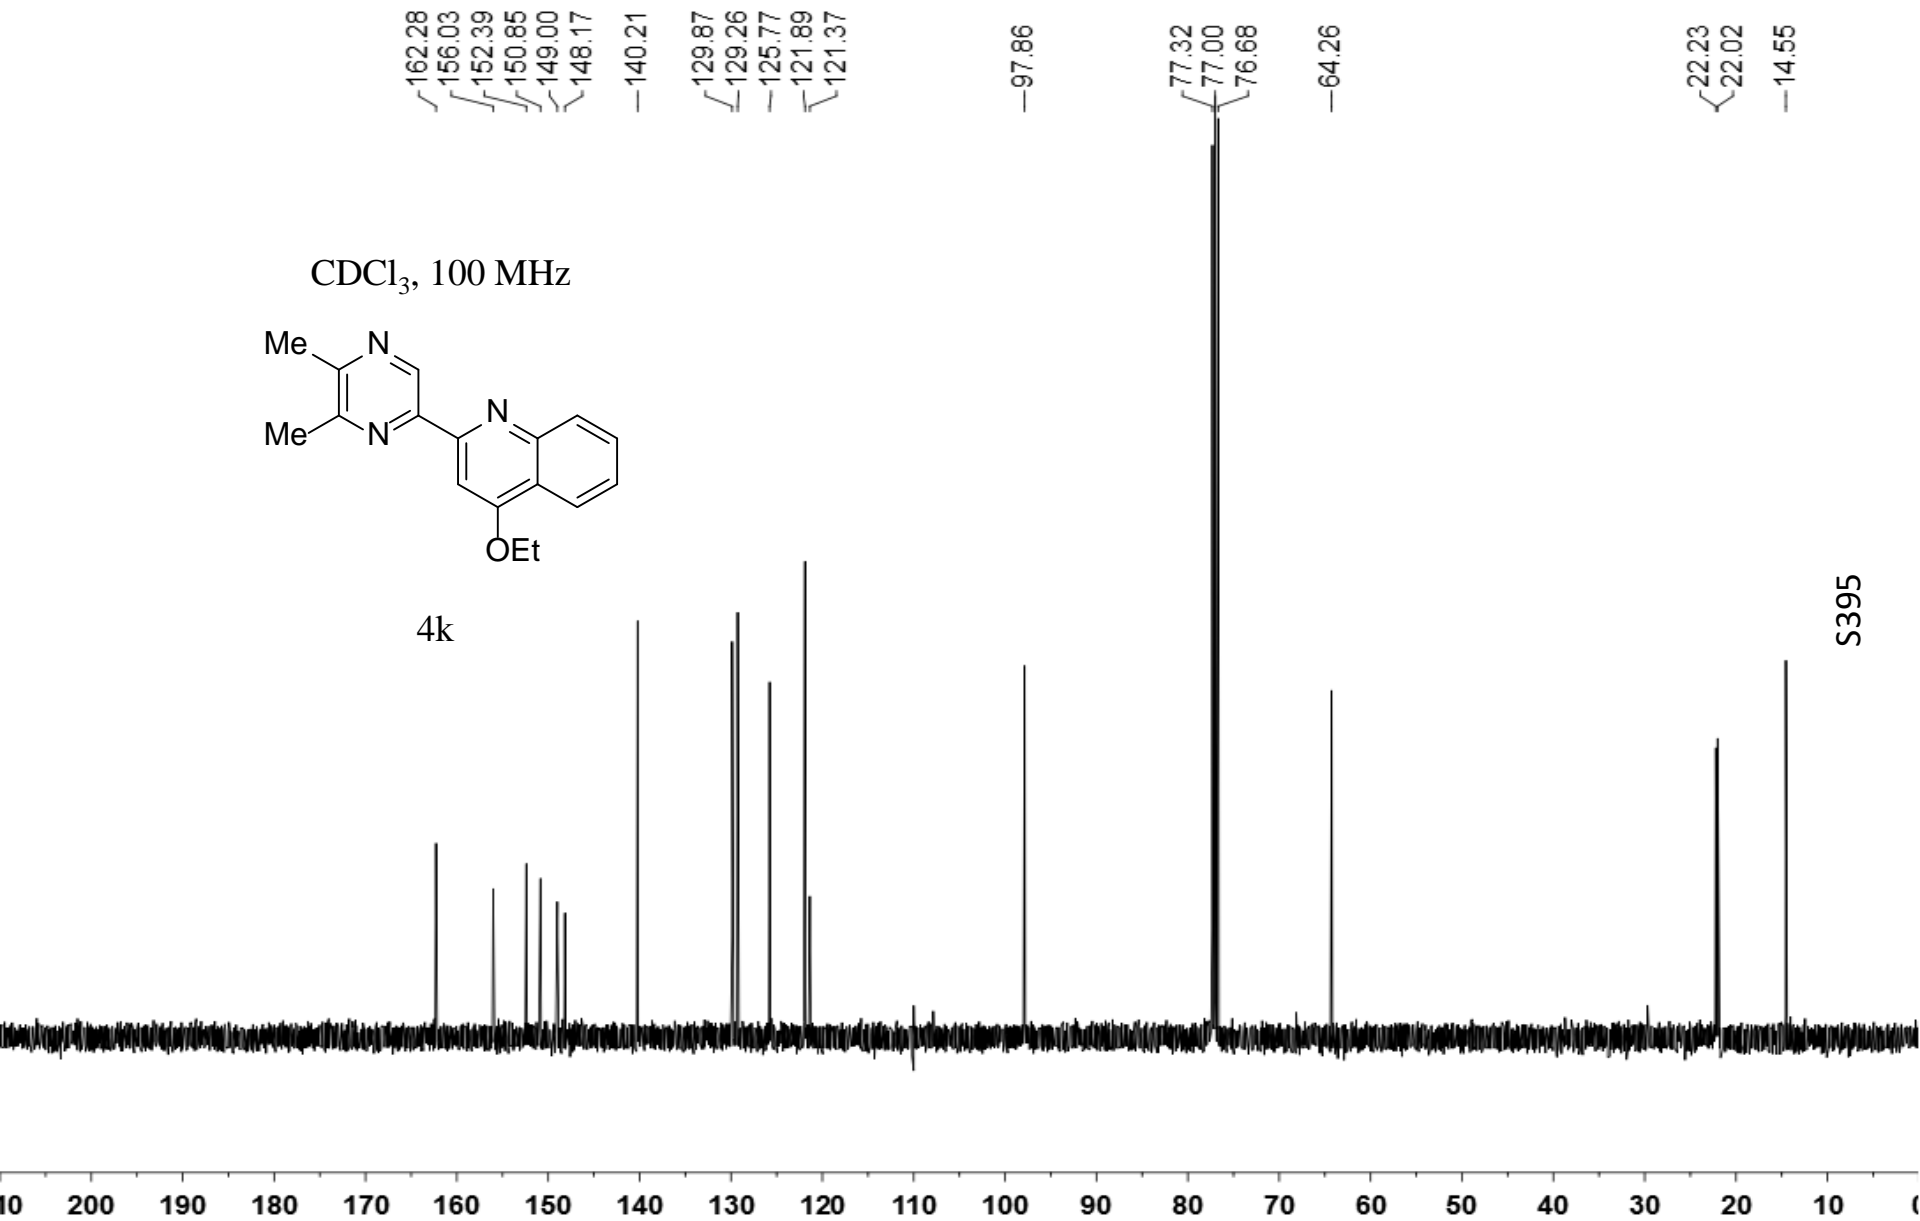

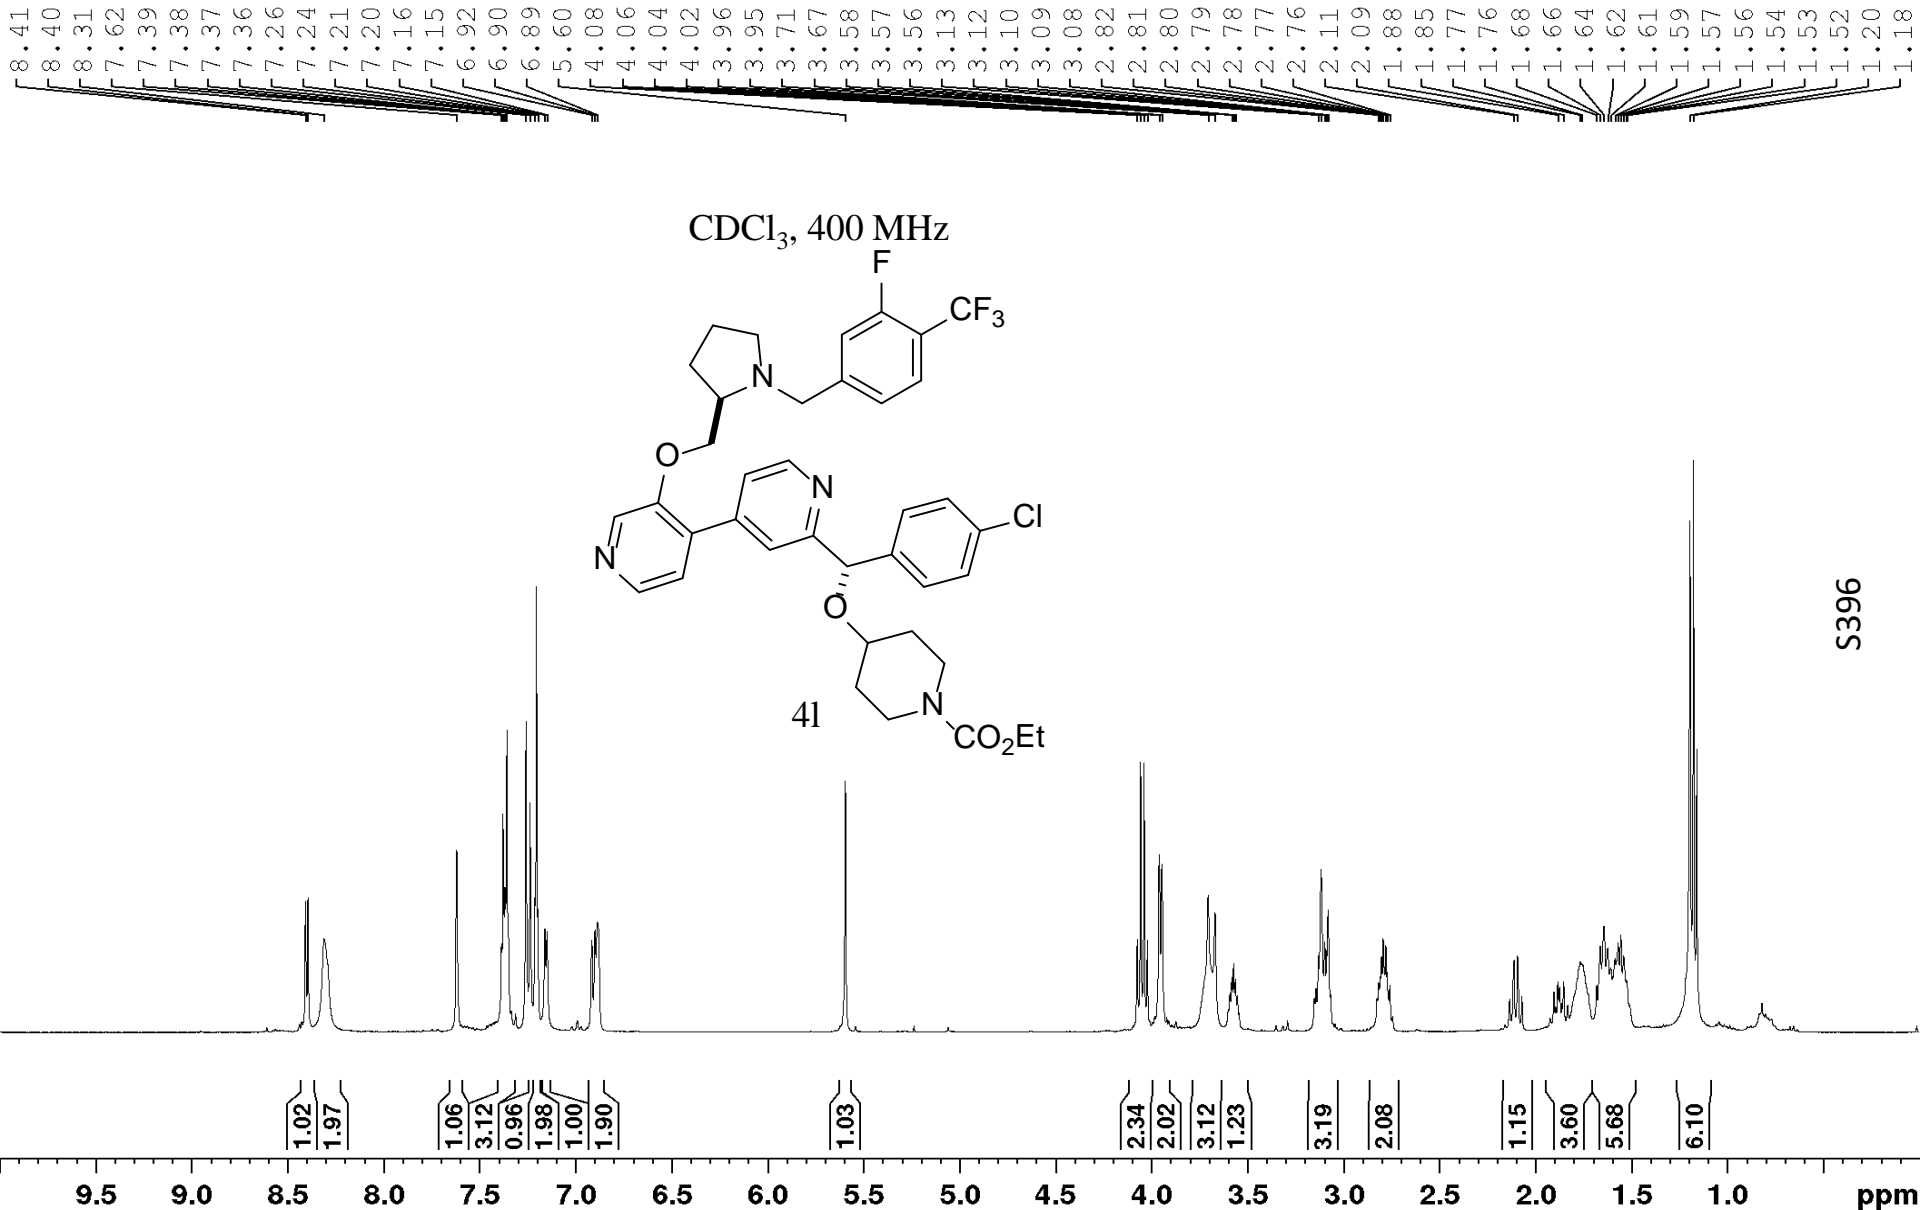

S396

161.94  
 160.99  
 160.97  
 158.45  
 158.42  
 155.47  
 151.76  
 148.82  
 147.53  
 147.46  
 144.64  
 143.16  
 140.14  
 135.40  
 134.77  
 133.47  
 128.65  
 128.08  
 126.82  
 126.77  
 126.76  
 126.73  
 126.71  
 123.99  
 123.86  
 123.24  
 123.21  
 122.58  
 121.30  
 120.63  
 116.80  
 116.68  
 116.48  
 116.35  
 116.19  
 115.98  
 80.93  
 73.07  
 72.80  
 62.61  
 61.28  
 58.75  
 54.74  
 41.07  
 41.00  
 31.16  
 31.01  
 29.67  
 28.59  
 23.26  
 14.66

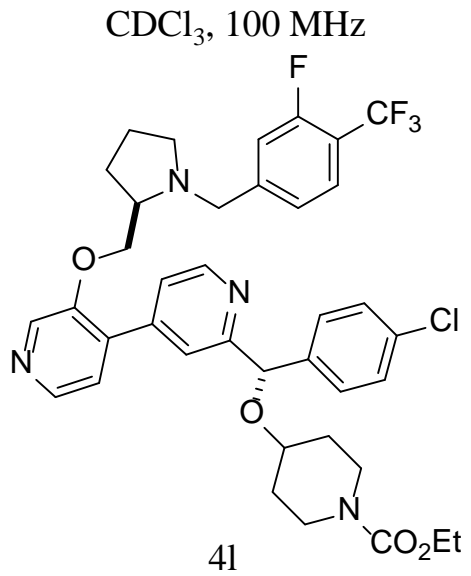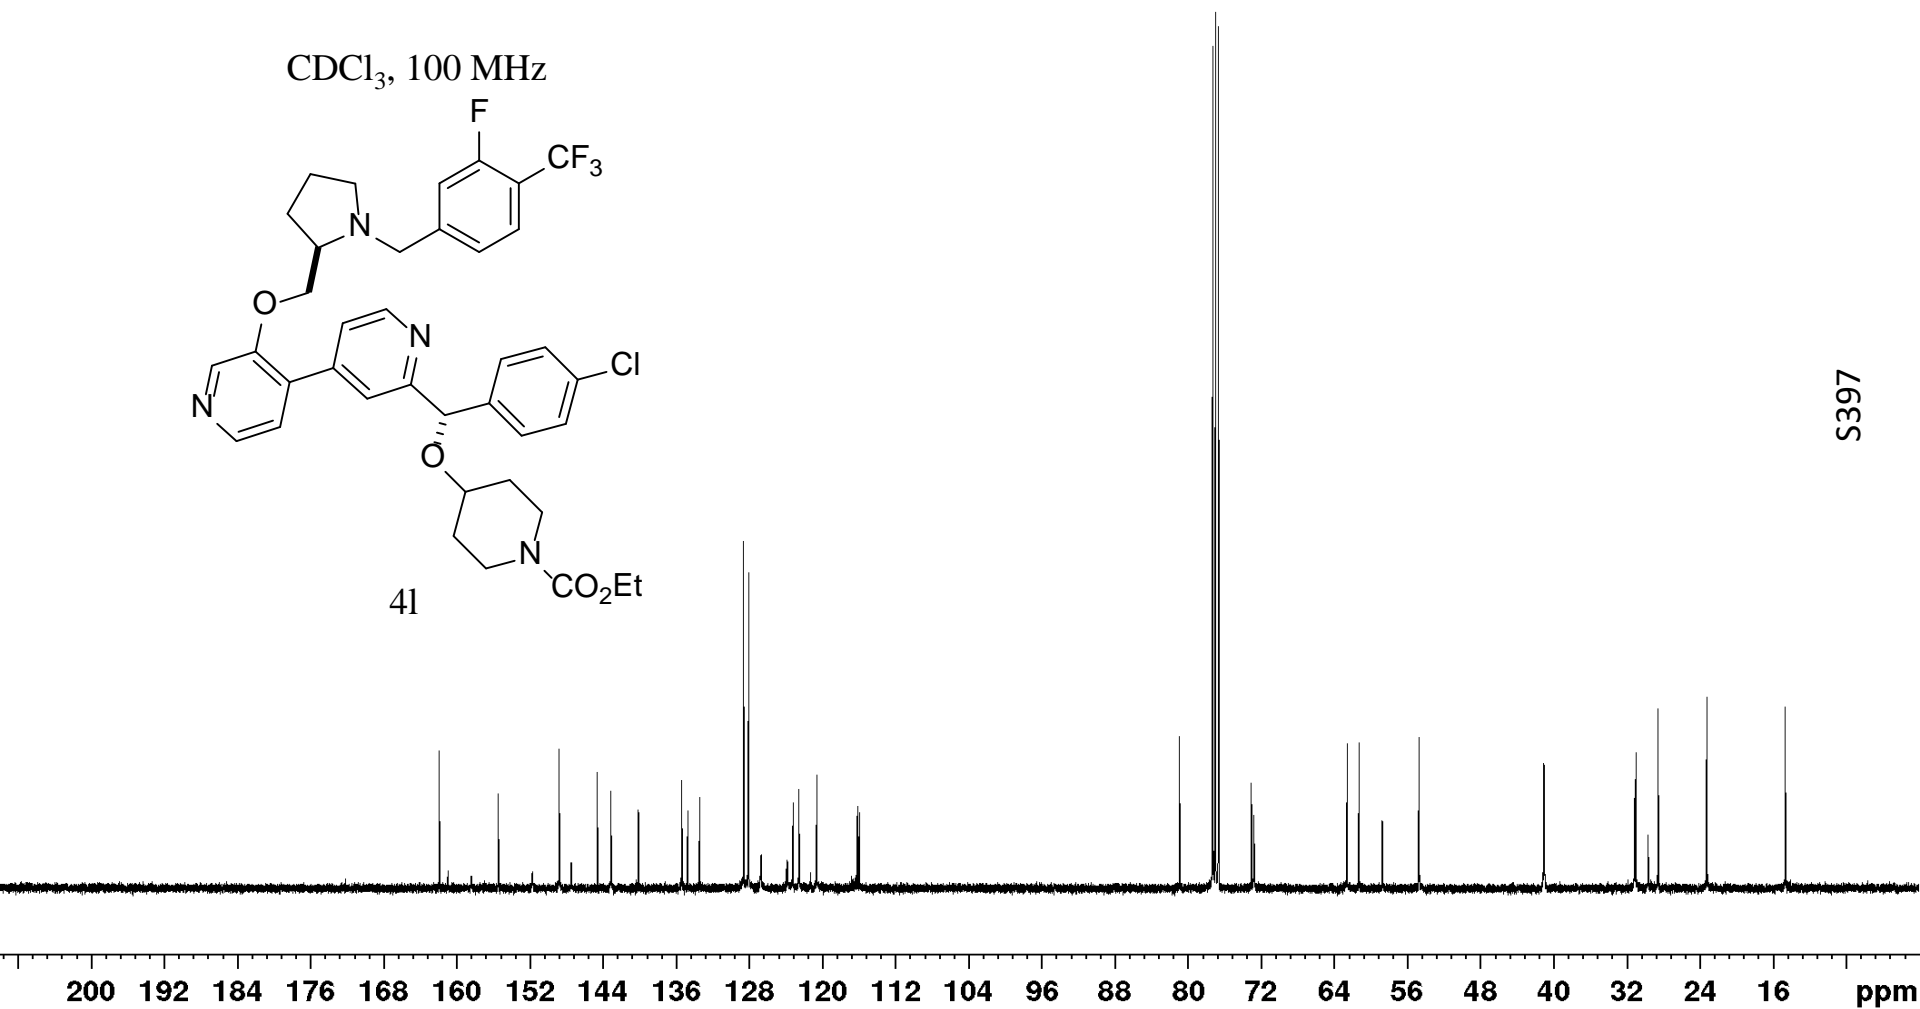

S397



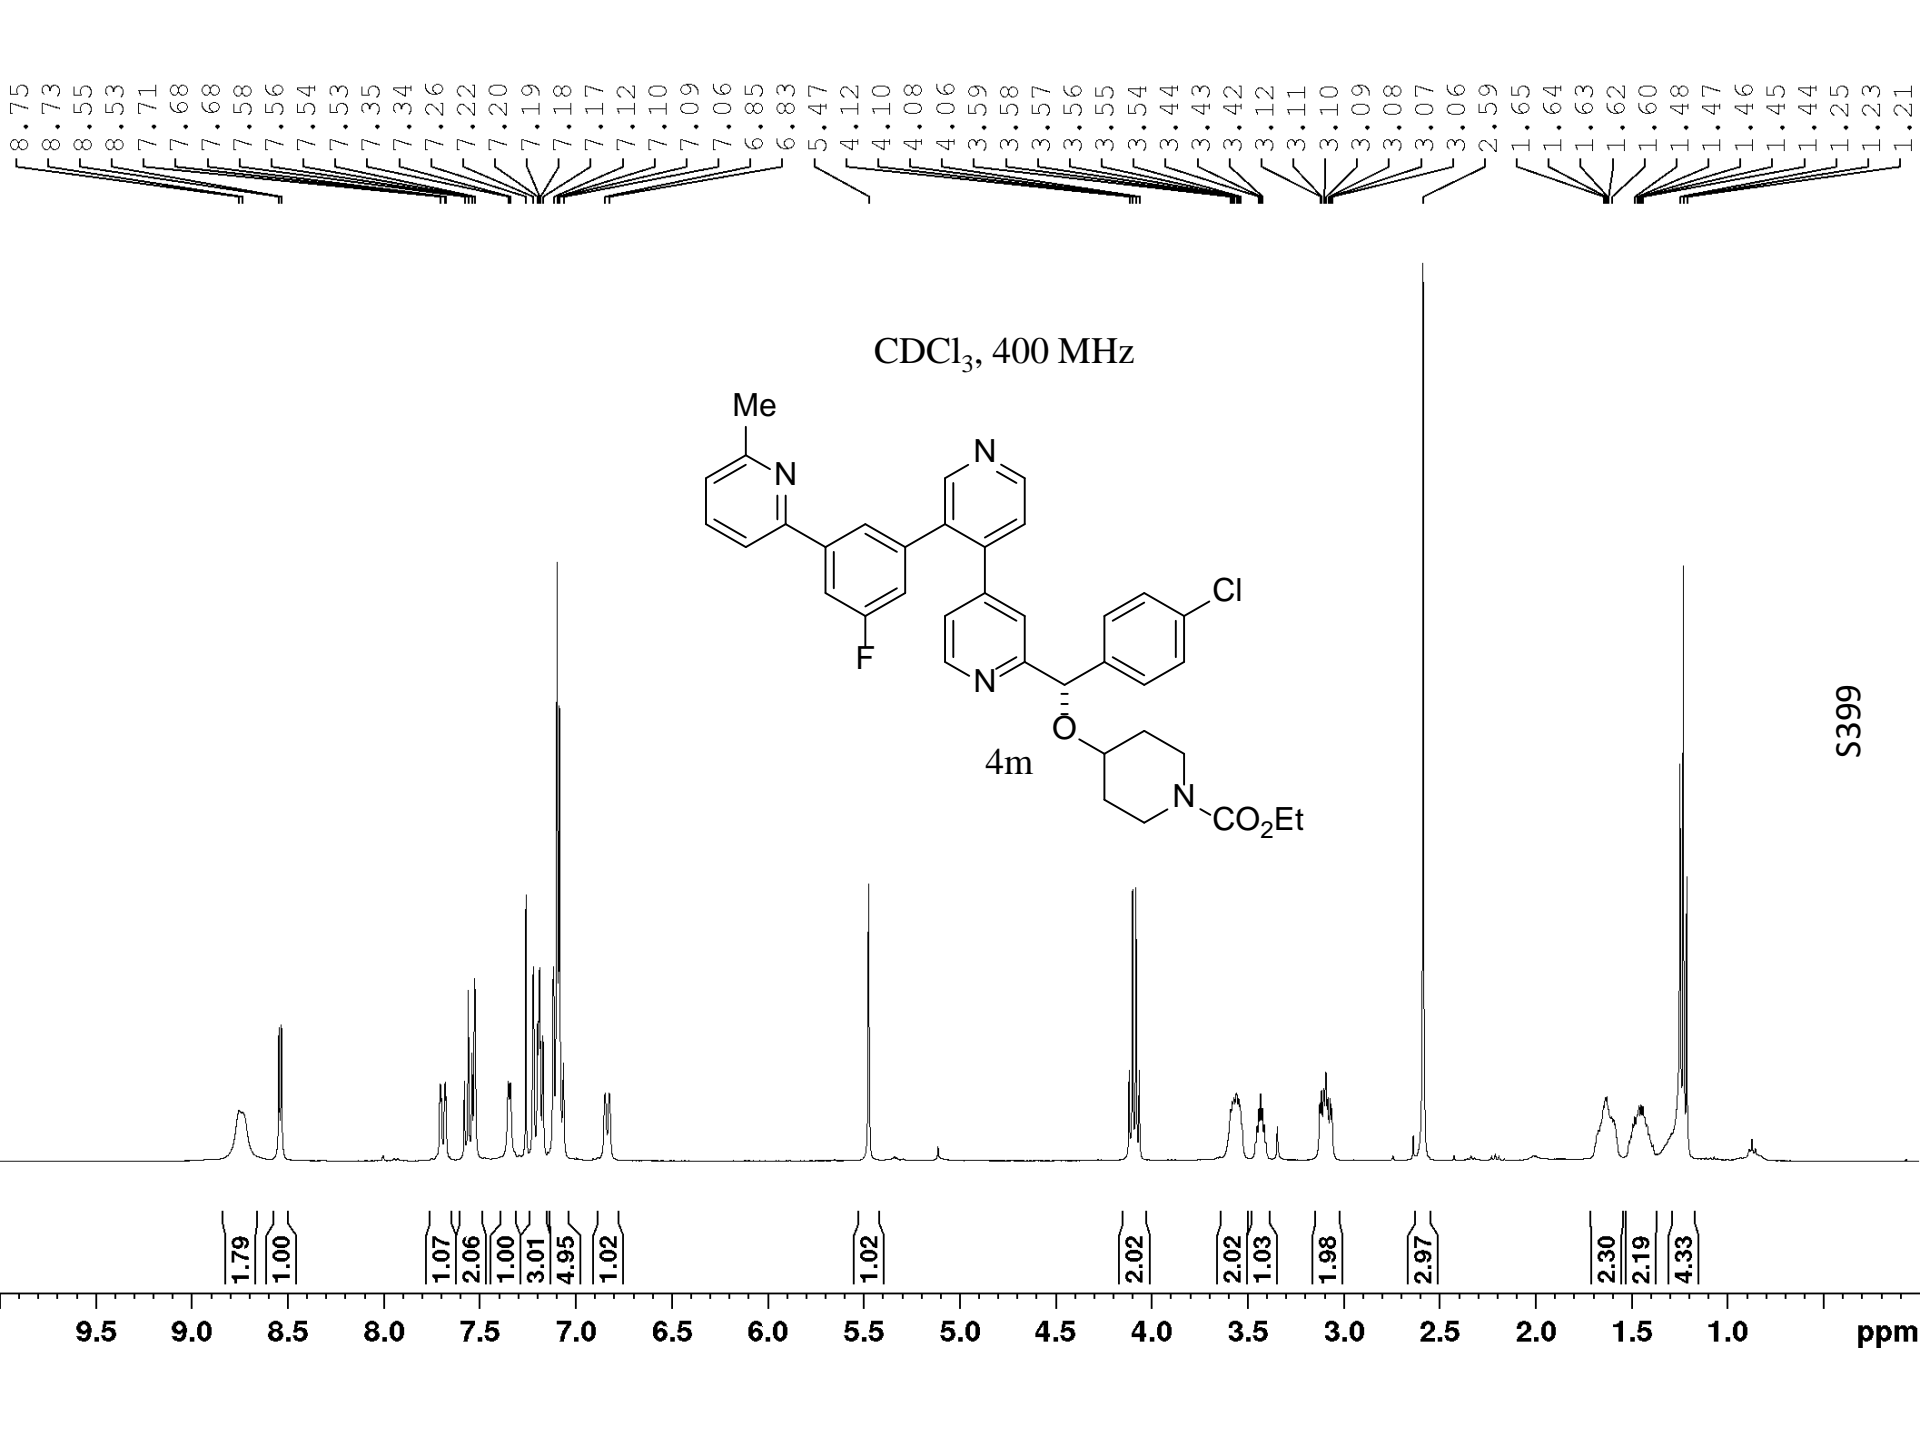

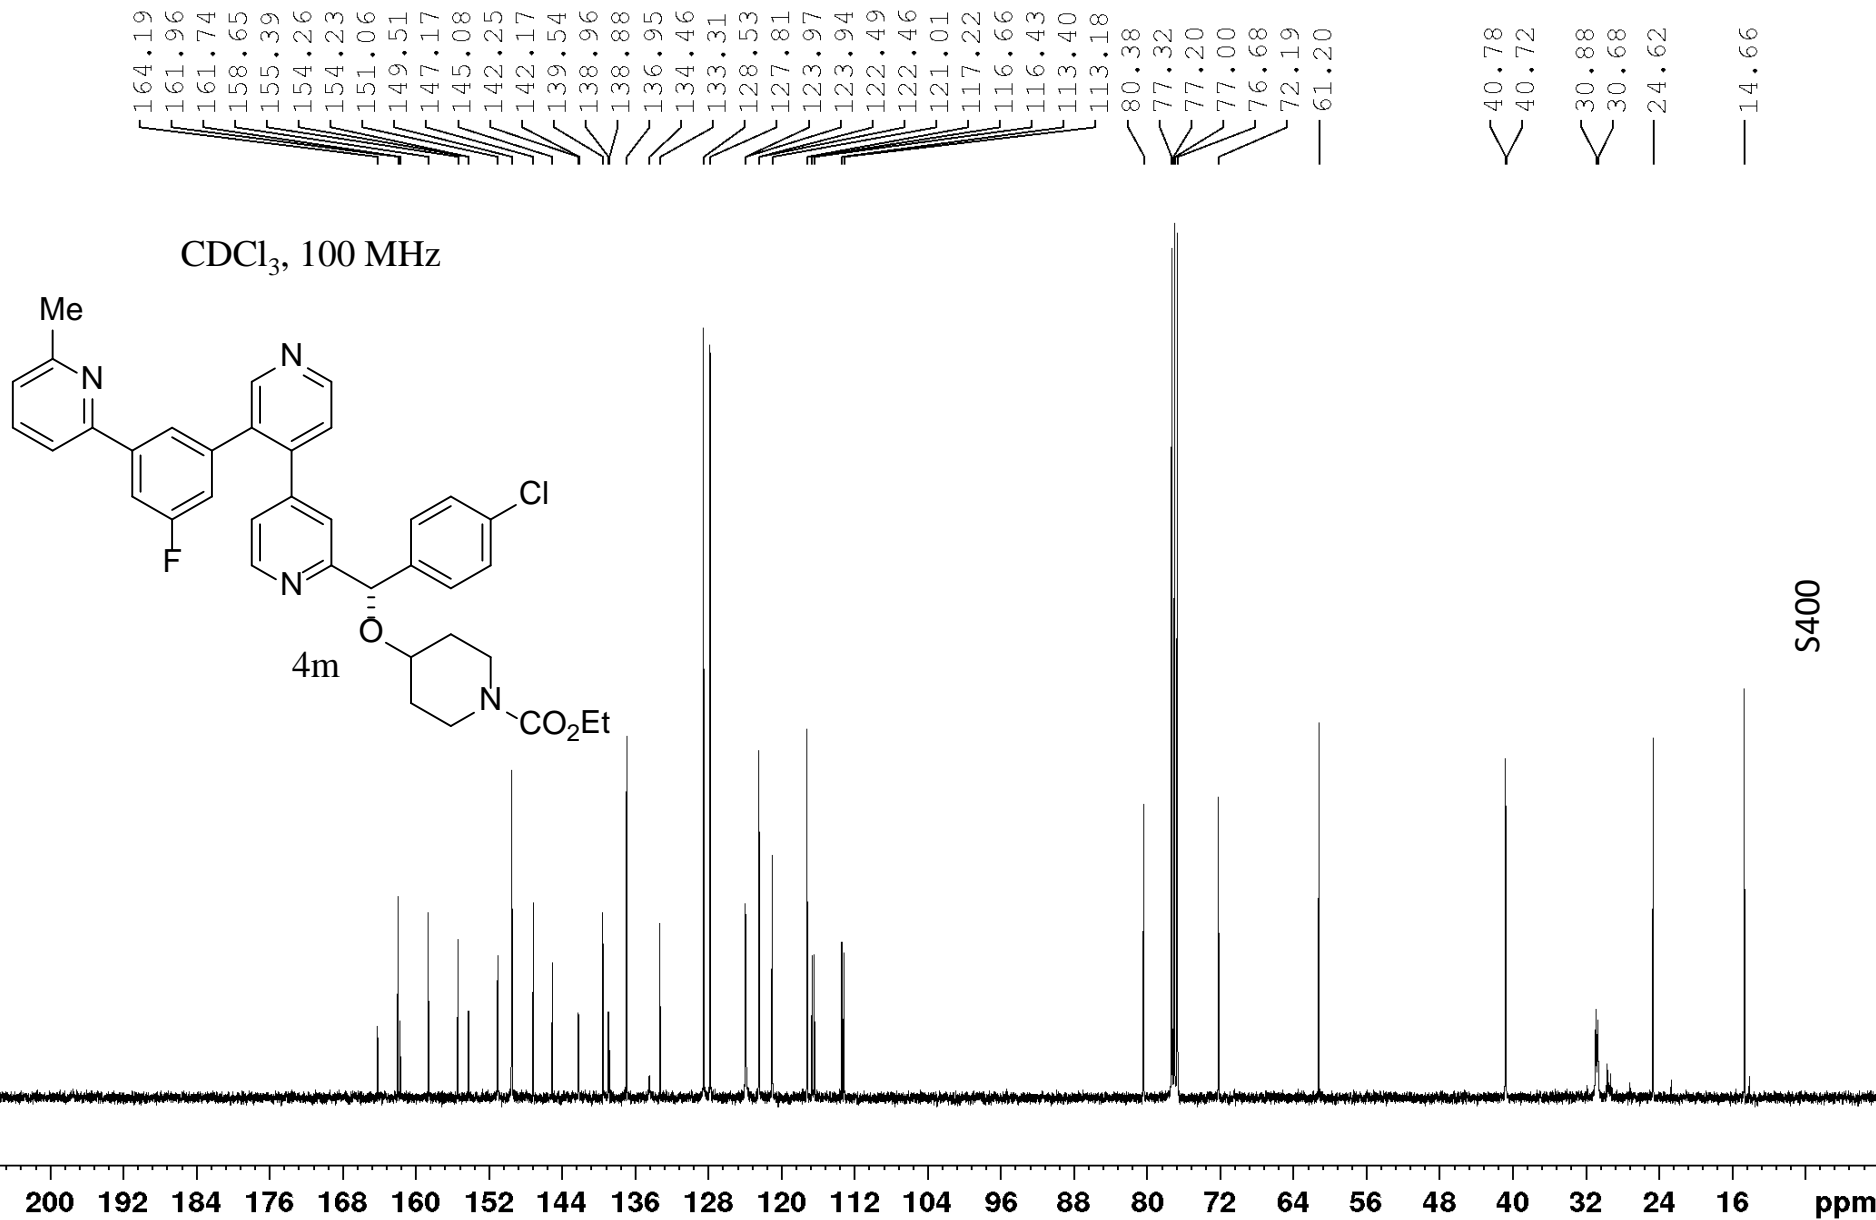



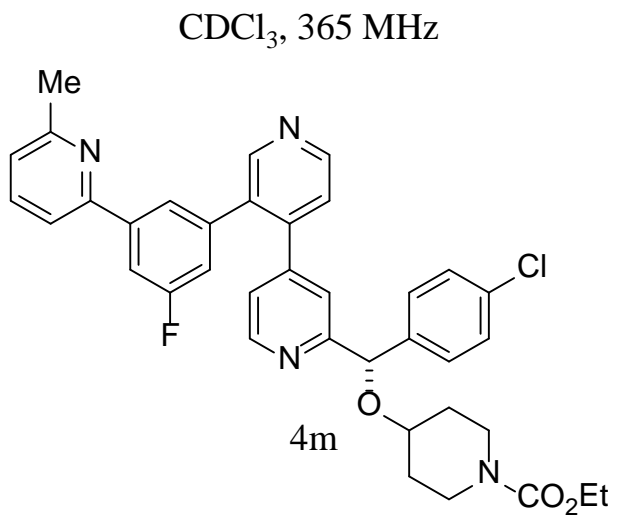

-112.23

0 -10 -20 -30 -40 -50 -60 -70 -80 -90 -100 -110 -120 -130 -140 -150 -160 -170 -180 ppm

S401

8.79  
8.21  
8.19  
8.19  
8.17  
7.76  
7.74  
7.73  
7.67  
7.56  
7.49  
7.47  
7.24  
7.21  
7.19  
7.08  
7.05  
7.03  
6.88

3.60  
3.44

2.47  
2.39  
2.36

1.63  
1.61  
1.58

1.22  
0.98  
0.97

CDCl<sub>3</sub>, 400 MHz

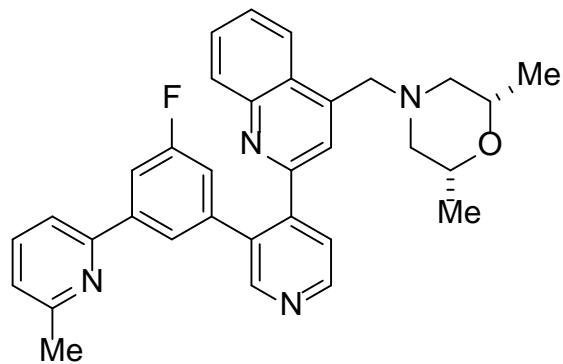

4n

S402

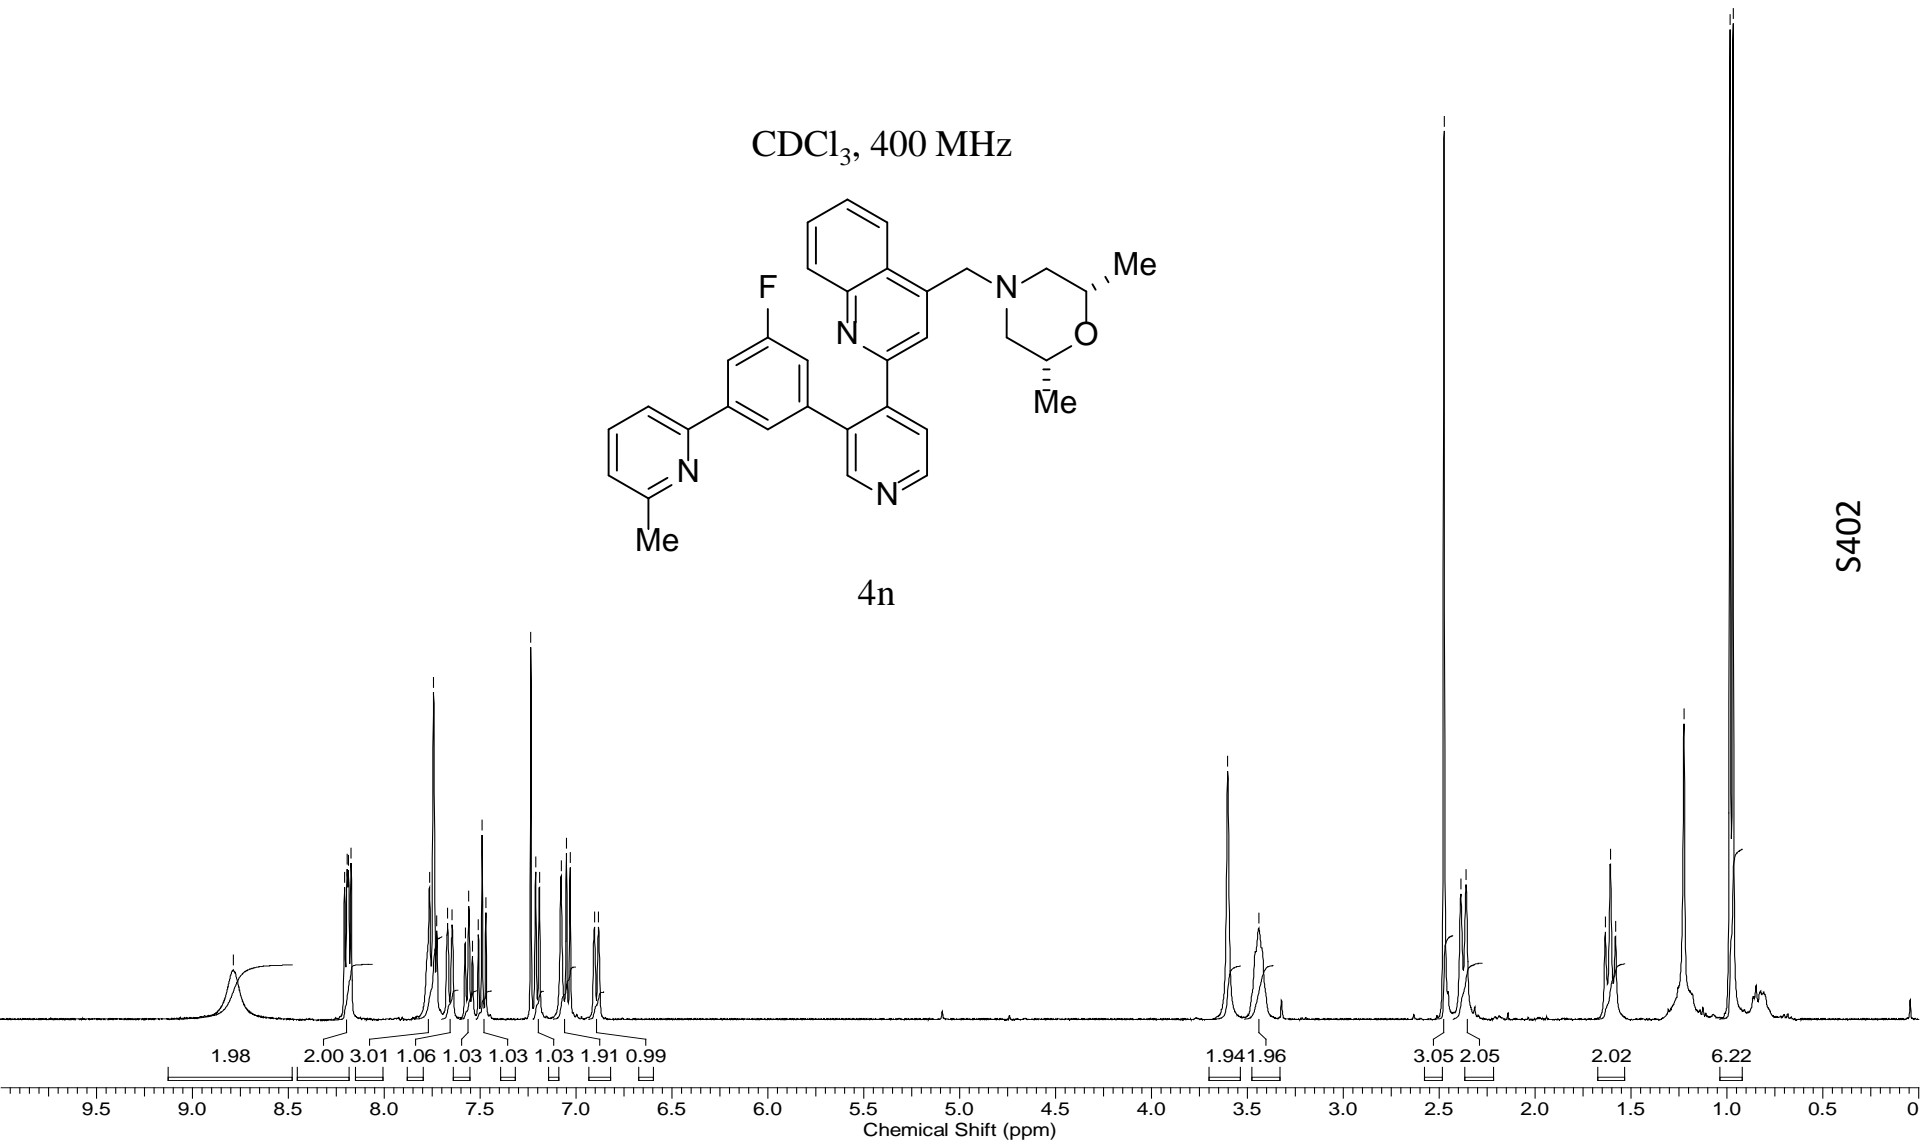

164.08  
161.64  
158.63  
156.35  
154.37  
154.34  
150.78  
149.58  
148.56  
146.79  
143.77  
142.22  
142.14  
139.77  
139.69  
136.94  
134.48  
130.18  
129.63  
126.86  
126.64  
124.61  
124.25  
123.95  
123.93  
122.63  
122.40  
117.22  
116.89  
116.67  
113.27  
113.05  
77.31  
77.20  
77.00  
76.68  
71.52  
59.81  
59.37

— 24.50  
— 18.83

CDCl<sub>3</sub>, 100 MHz

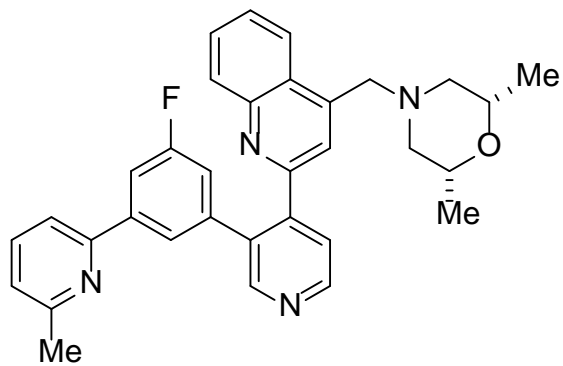

200 192 184 176 168 160 152 144 136 128 120 112 104 96 88 80 72 64 56 48 40 32 24 16 ppm

S403

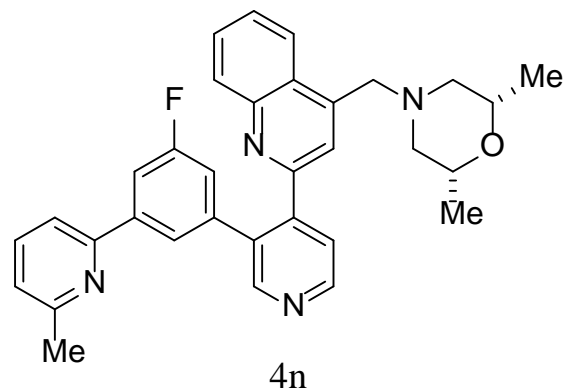

-112.28

0 -10 -20 -30 -40 -50 -60 -70 -80 -90 -100 -110 -120 -130 -140 -150 -160 -170 -180 ppm

S404

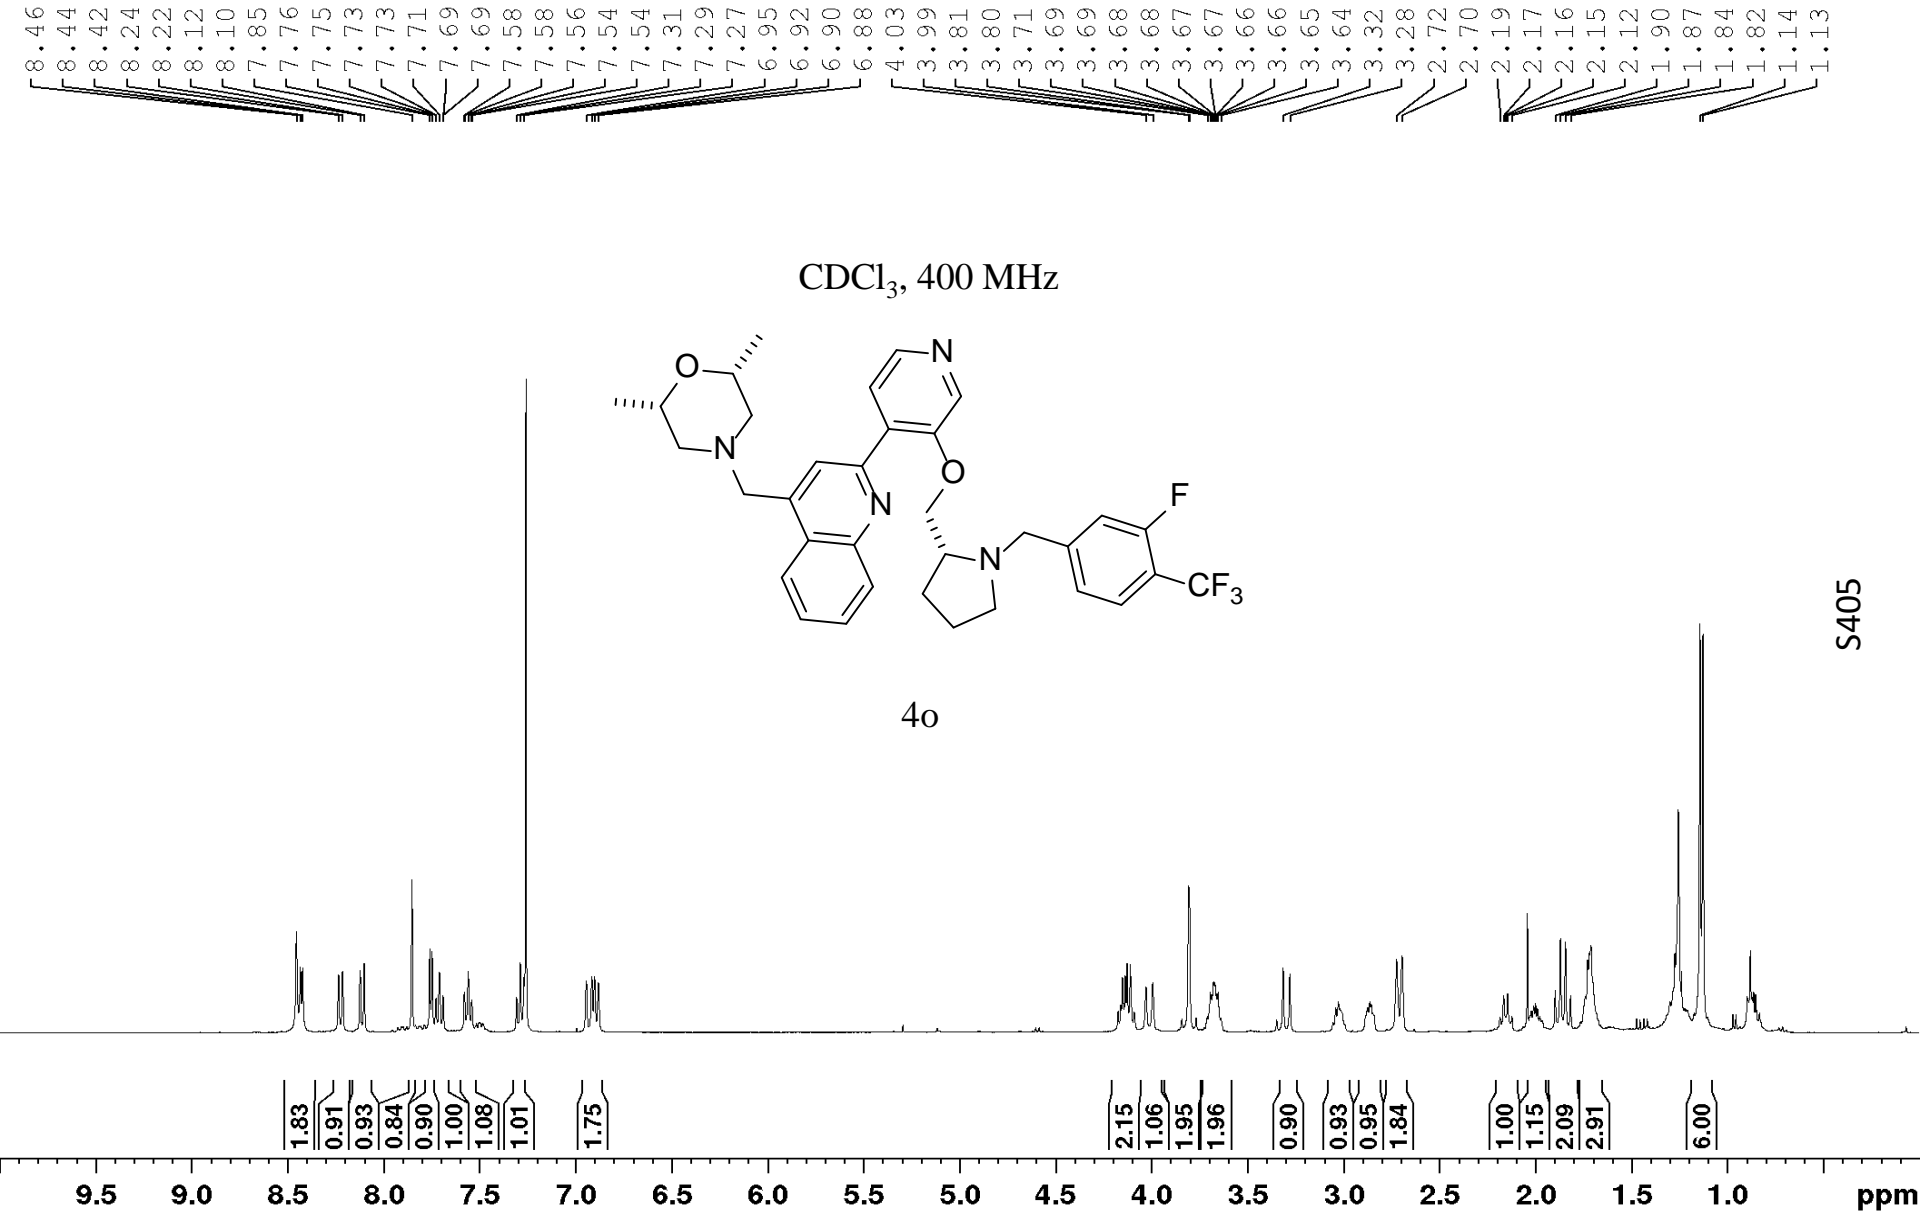

S405

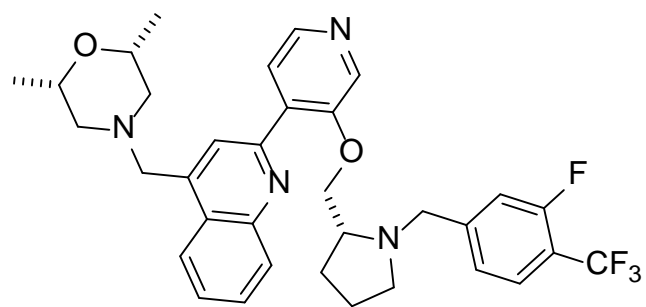

4o

CDCl<sub>3</sub>, 100 MHz

160.83  
158.31  
154.01  
152.42  
148.39  
147.25  
147.19  
143.38  
143.23  
136.59  
135.72  
124.75  
124.17  
123.98  
123.32  
123.28  
122.97  
121.26  
116.20  
115.99

73.11  
71.68  
71.66  
62.43  
60.13  
59.74  
59.65  
58.86  
54.66

28.60  
23.29  
19.08  
19.07

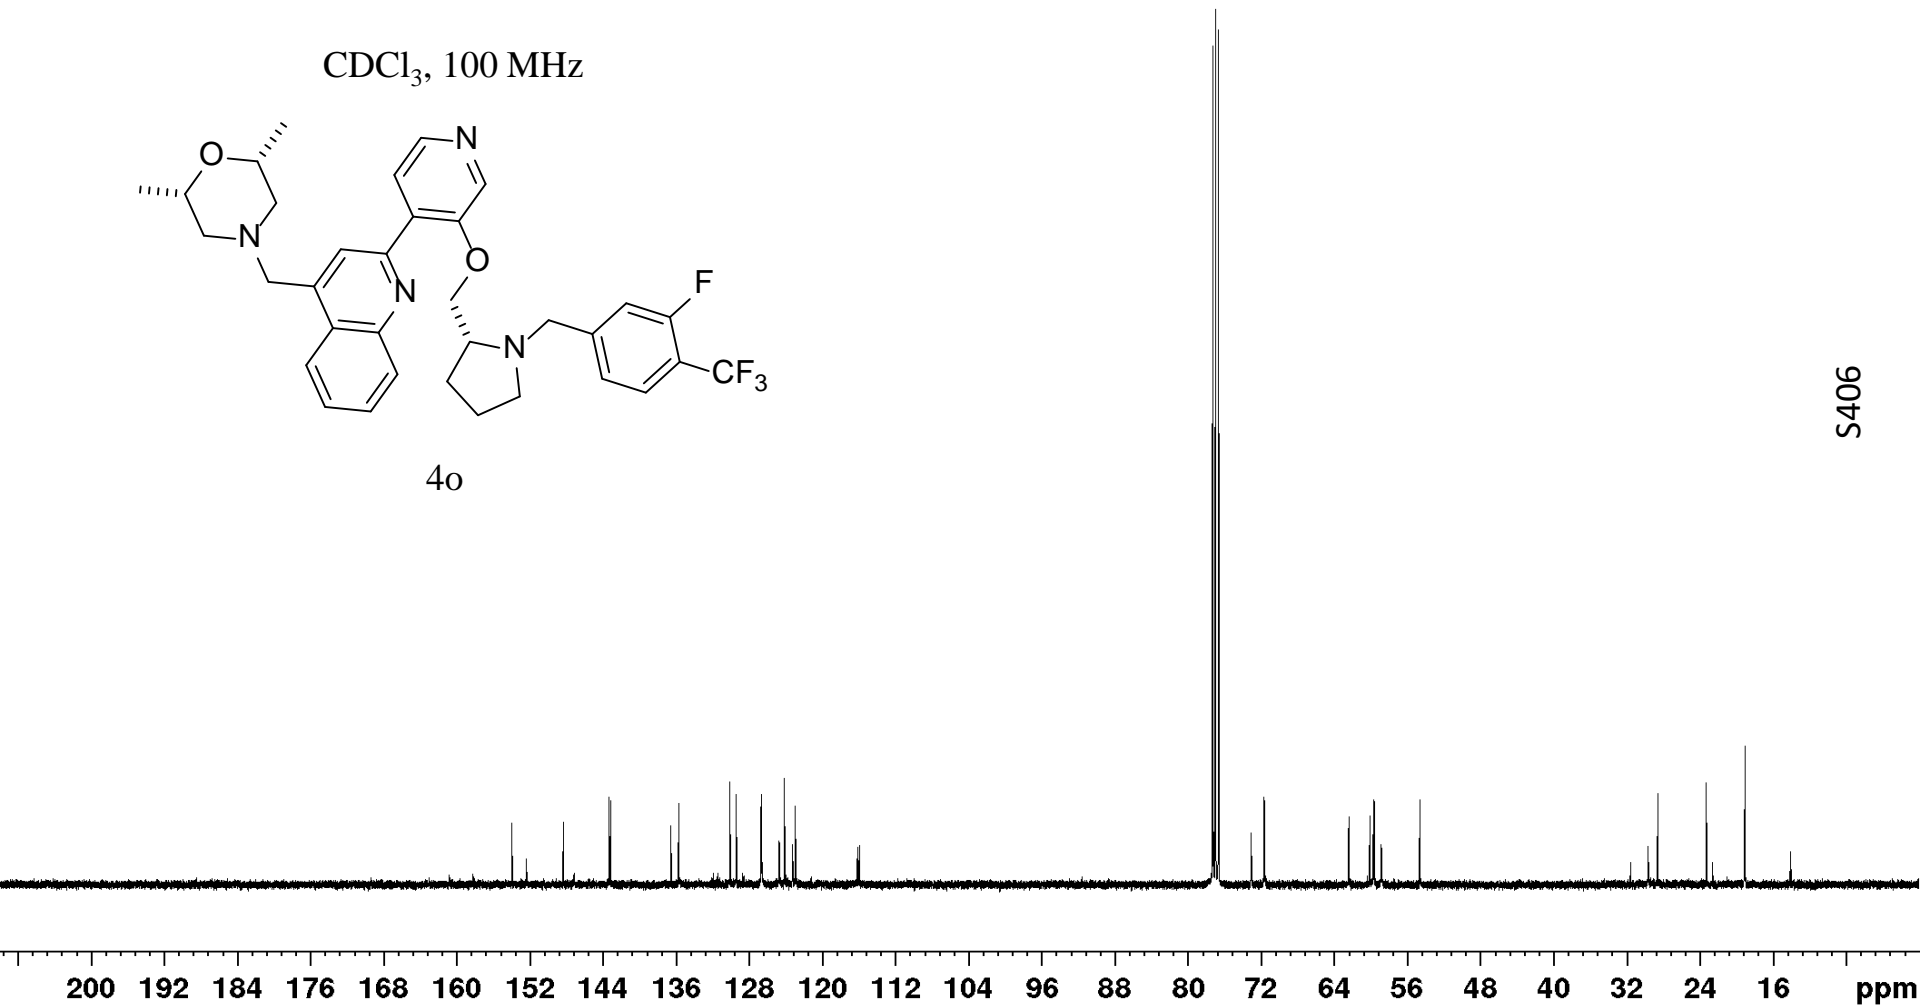

S406

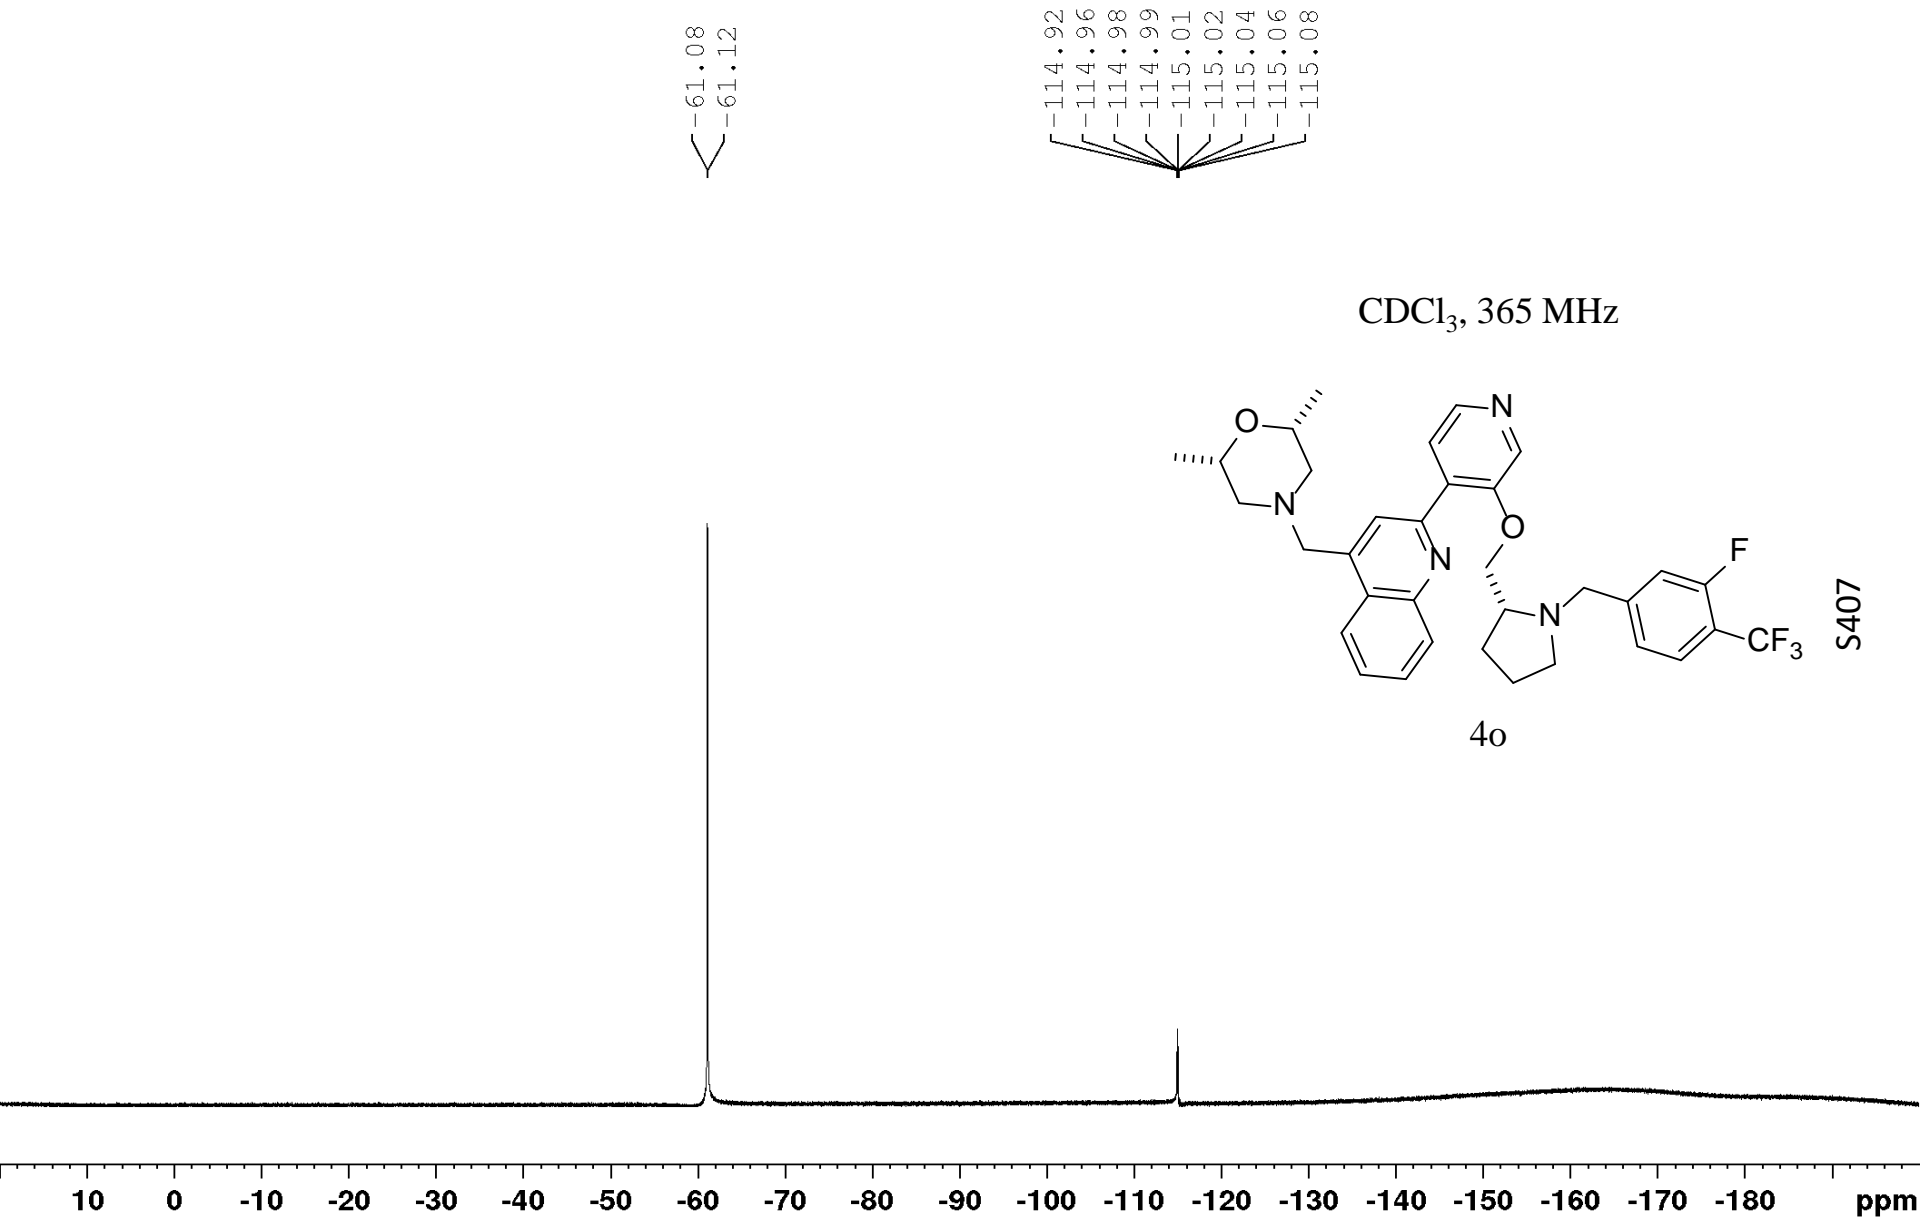

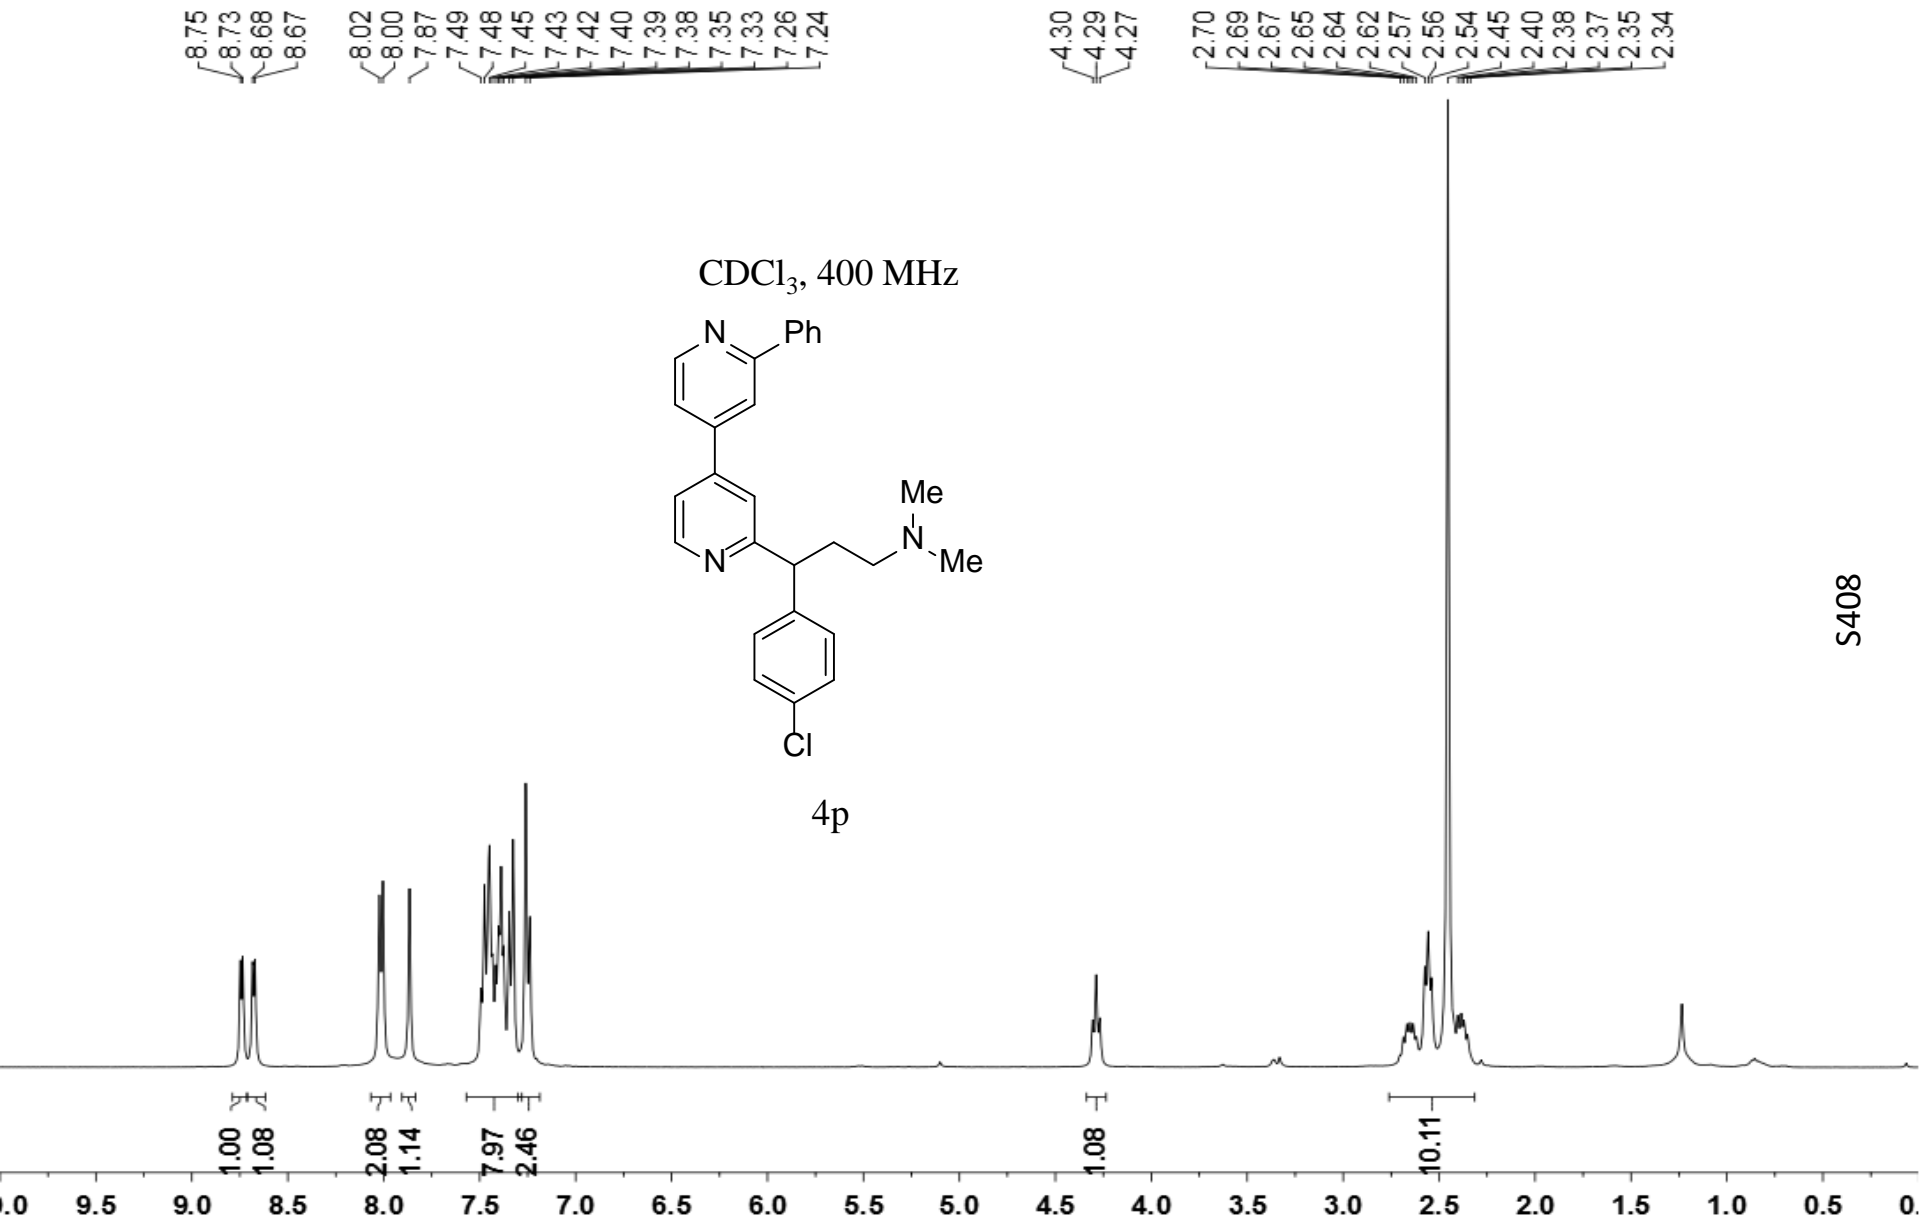

S408



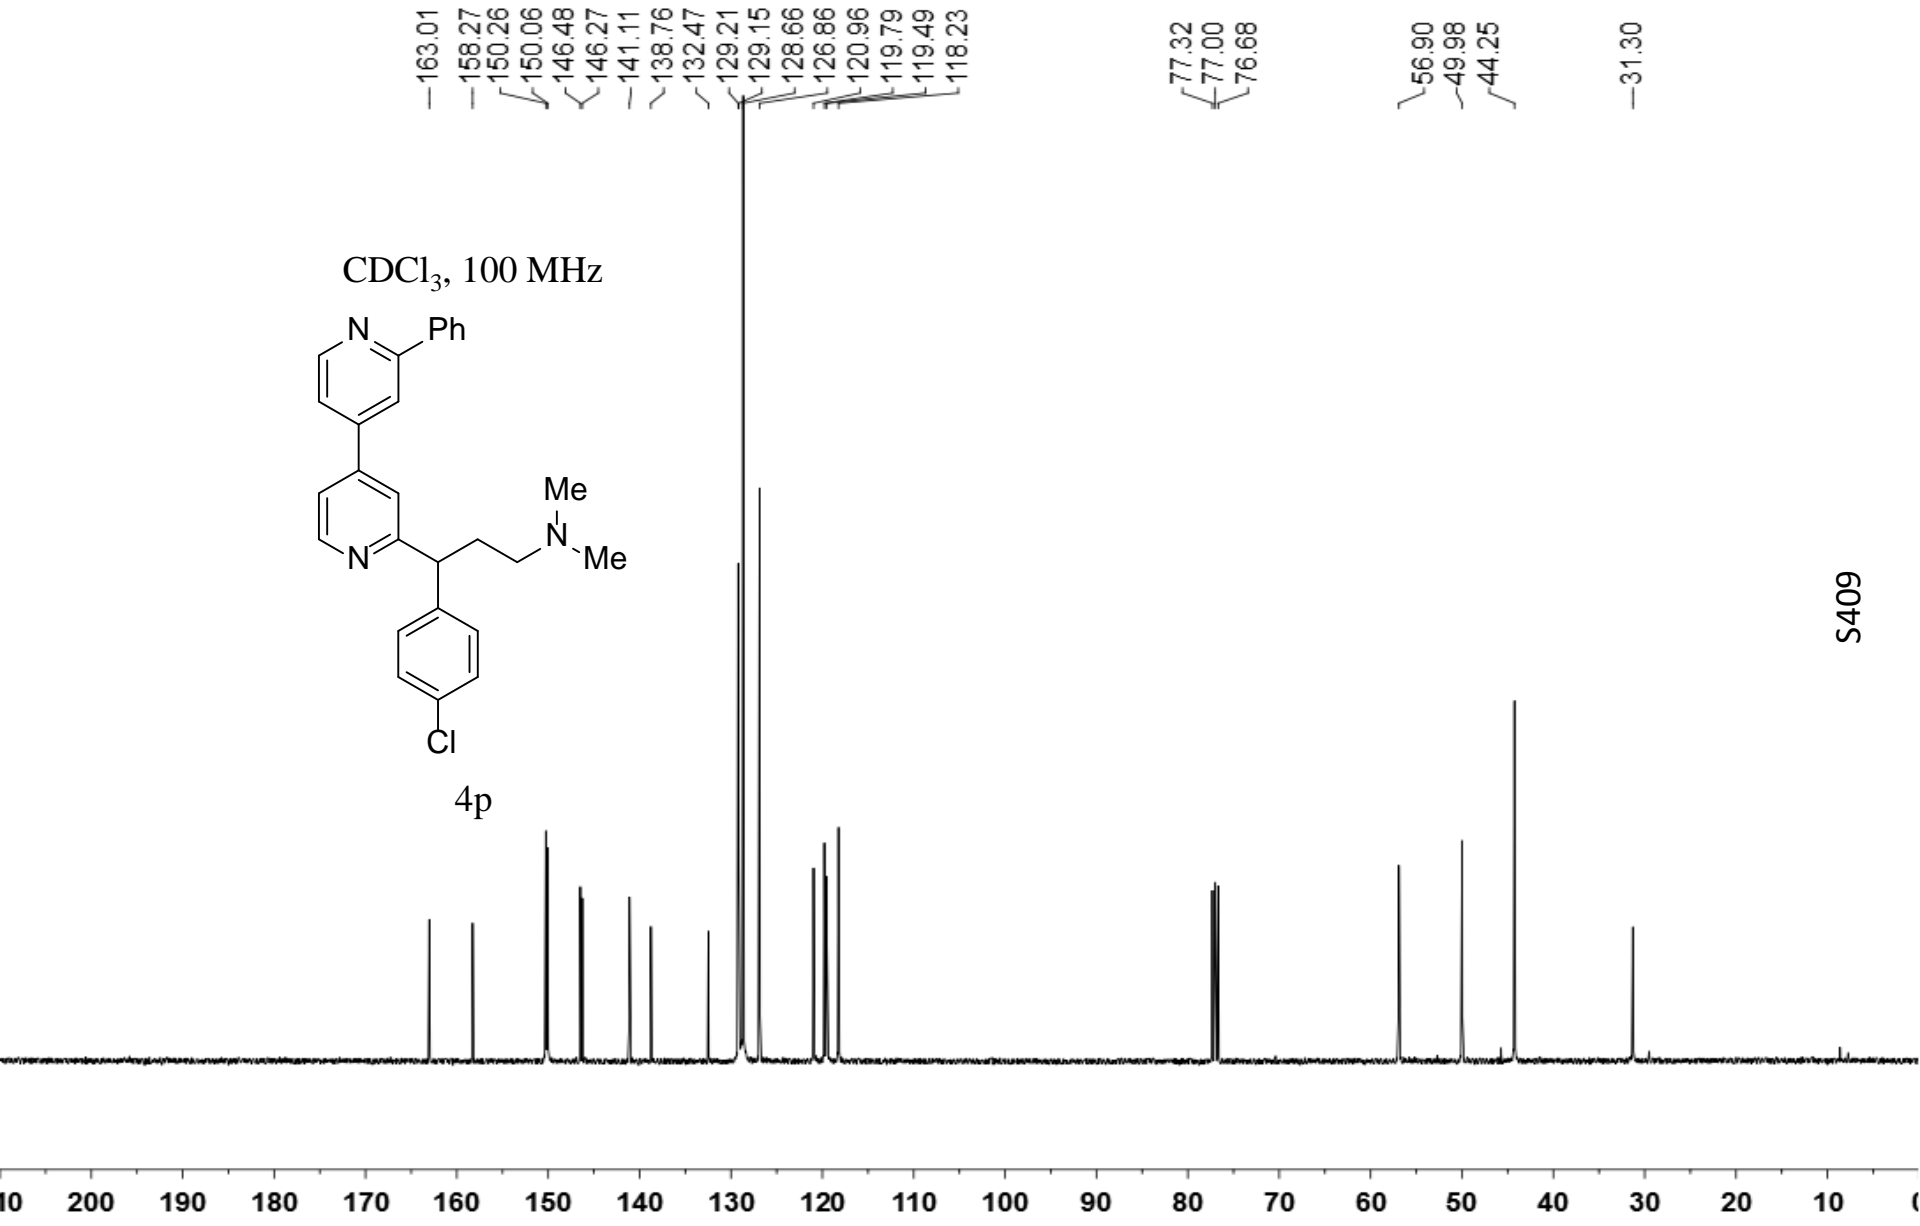

S409

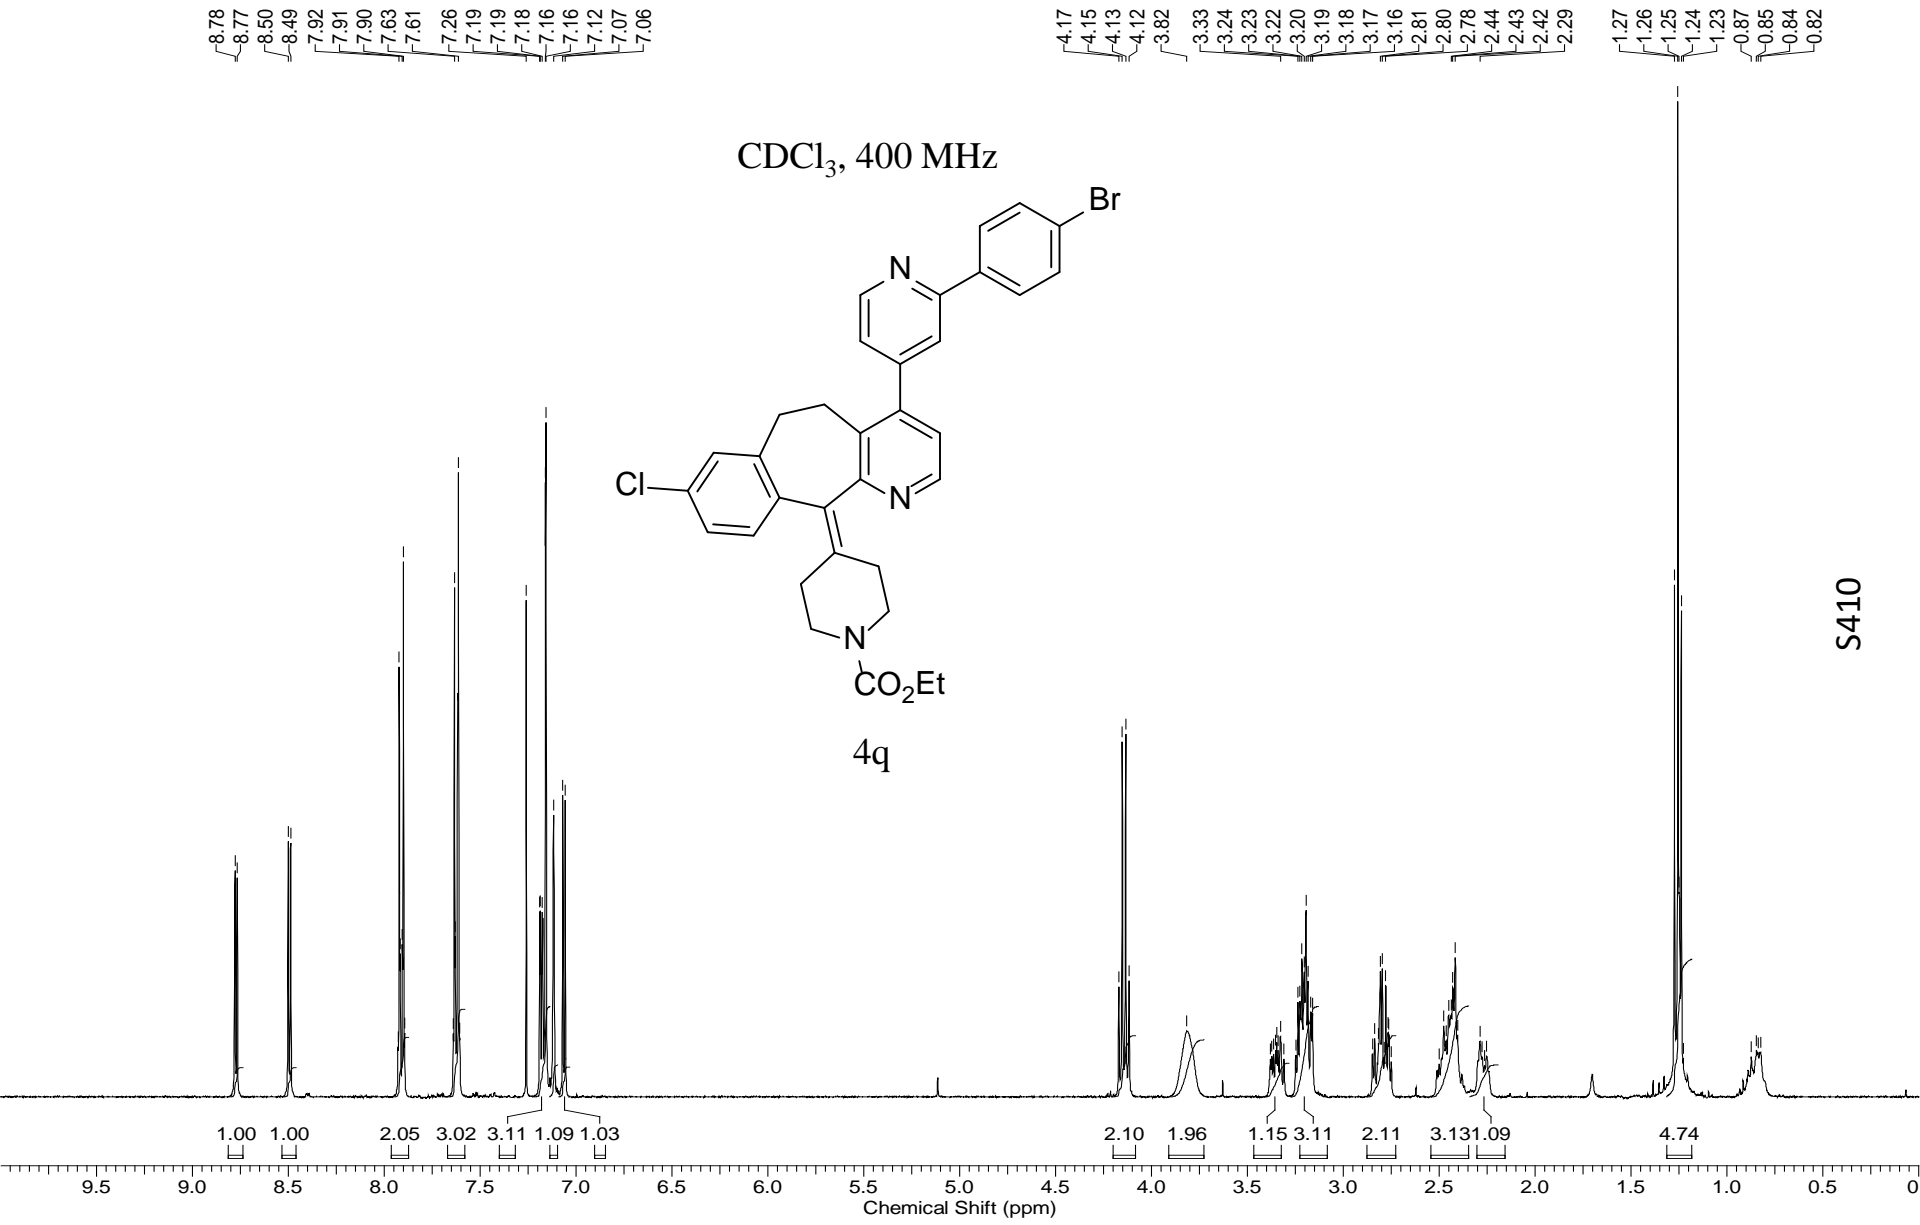

S410

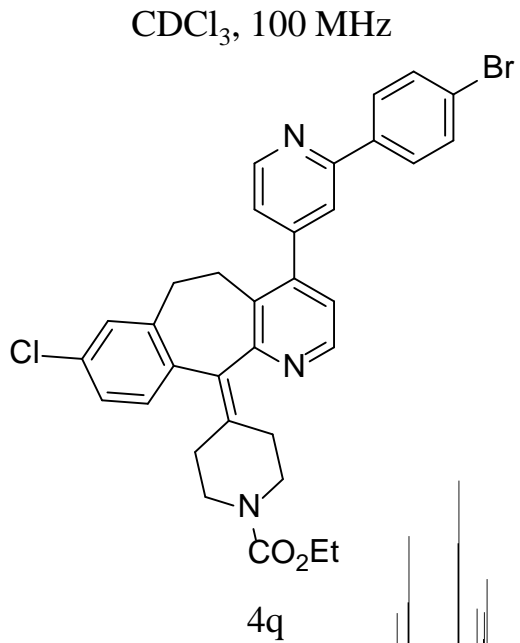

159.73  
 156.58  
 155.34  
 149.87  
 147.81  
 147.09  
 146.77  
 138.50  
 137.53  
 137.34  
 135.89  
 134.11  
 133.01  
 131.90  
 131.21  
 130.30  
 129.60  
 128.41  
 126.07  
 123.84  
 122.53  
 121.87  
 119.70

77.31  
 77.20  
 77.00  
 76.68

61.24

44.69  
 44.57

32.12  
 30.60  
 30.51  
 27.48

14.58

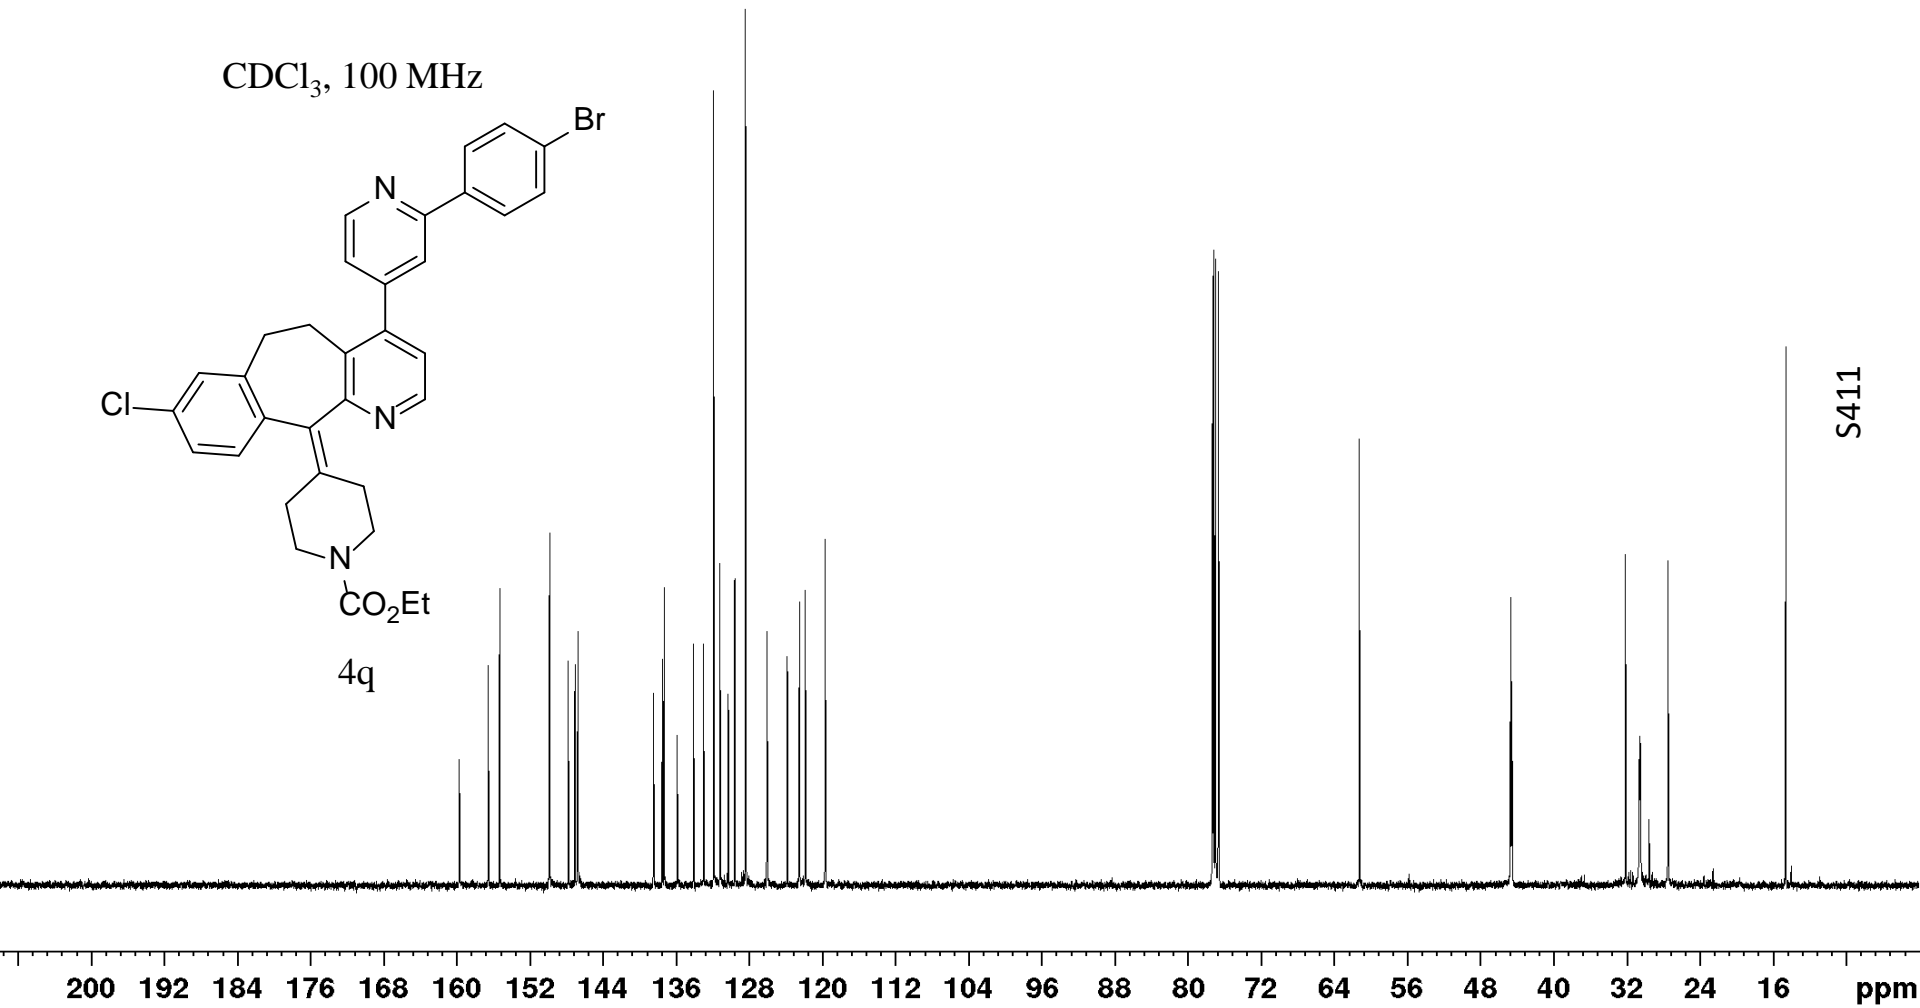

S411

8.89  
8.88  
8.51  
8.27  
8.21  
8.15  
8.13  
8.11  
8.10  
8.10  
8.01  
7.95  
7.82  
7.80  
7.66  
7.63

DMSO<sub>d6</sub>, 400 MHz

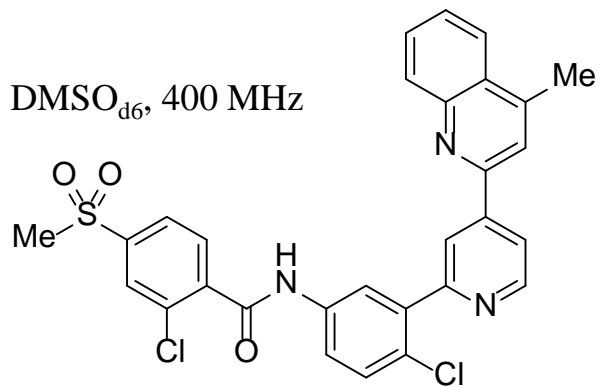

4r

3.36

2.79

2.50

1.00 1.01 1.04 1.05 4.02 1.03 1.04 2.09 2.13

4.70

3.15

9.5 9.0 8.5 8.0 7.5 7.0 6.5 6.0 5.5 5.0 4.5 4.0 3.5 3.0 2.5 2.0 1.5 1.0 0.5 0

Chemical Shift (ppm)

S412

163.87  
156.84  
152.95  
150.28  
147.31  
146.12  
143.13  
140.84  
139.31  
137.65  
130.97  
130.44  
129.94  
128.10  
127.60  
127.16  
125.99  
125.91  
124.21  
122.35  
121.81  
119.31

43.09  
40.14  
39.93  
39.72  
39.51  
39.31  
39.09  
38.88

18.39

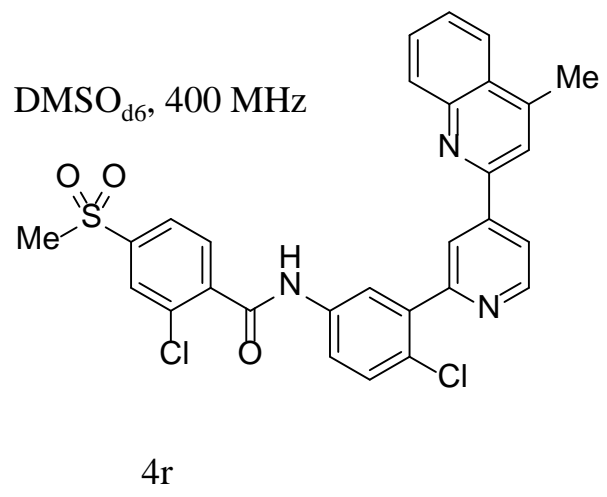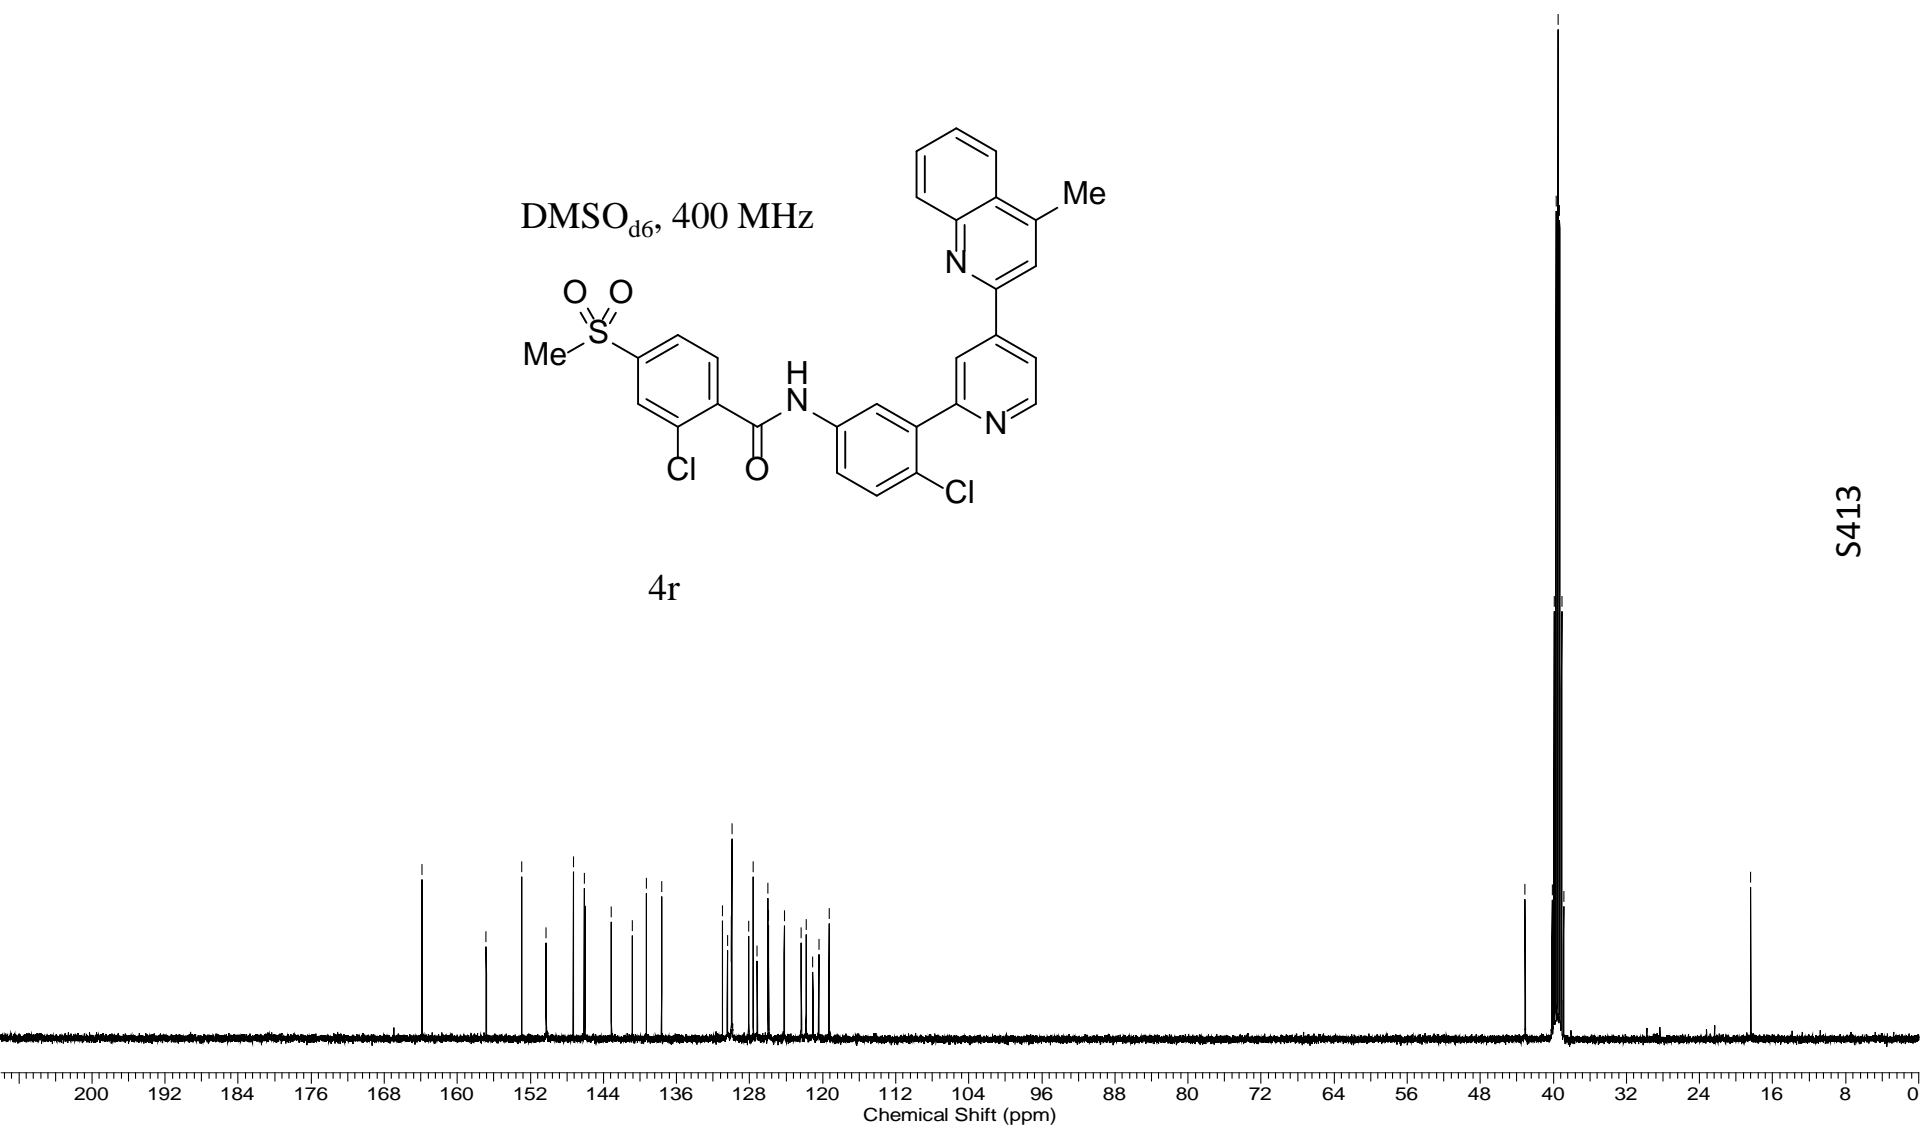

S413

8.25  
8.23  
8.16  
8.16  
8.14  
8.10  
7.98  
7.96  
7.69  
7.67  
7.65  
7.60  
7.60  
7.52  
7.51  
7.49  
7.21  
7.21  
7.19

4.50  
4.48  
4.46  
4.44

1.65  
1.64  
1.62

CDCl<sub>3</sub>, 400 MHz

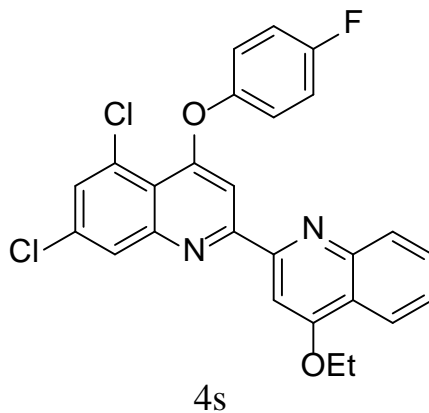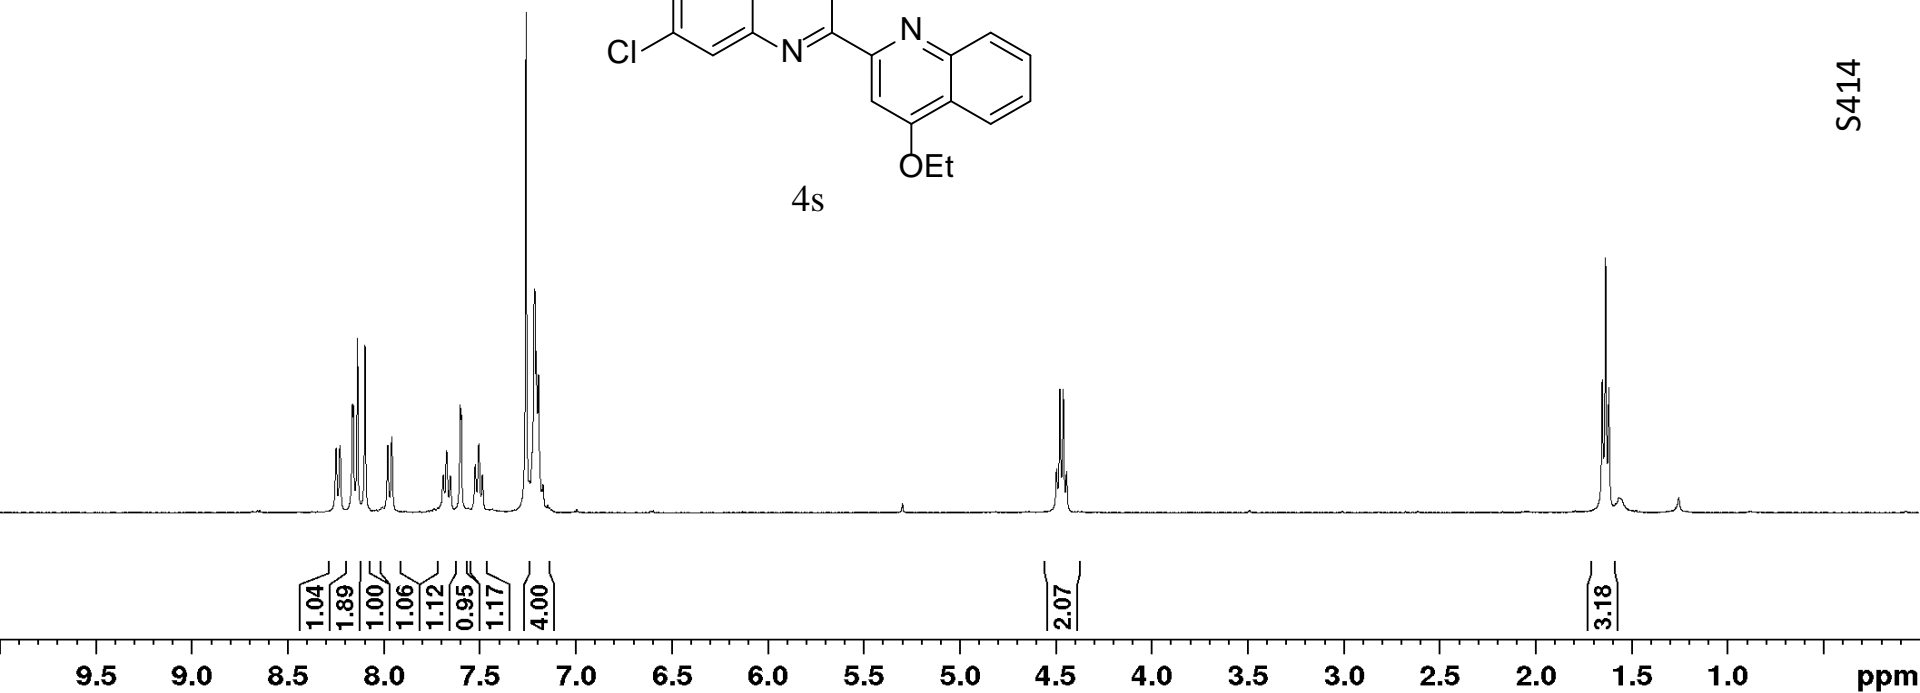

S414

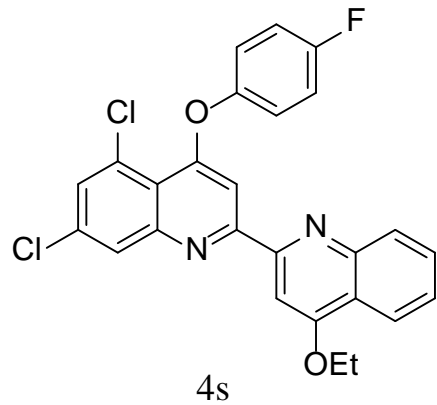

162.60  
162.32  
161.14  
158.99  
158.71  
155.89  
151.37  
150.40  
150.38  
148.69  
134.94  
130.24  
129.86  
129.67  
129.42  
128.18  
126.26  
122.11  
122.02  
121.94  
121.77  
118.42  
117.10  
116.87  
105.31  
98.17

— 64.38

— 14.55

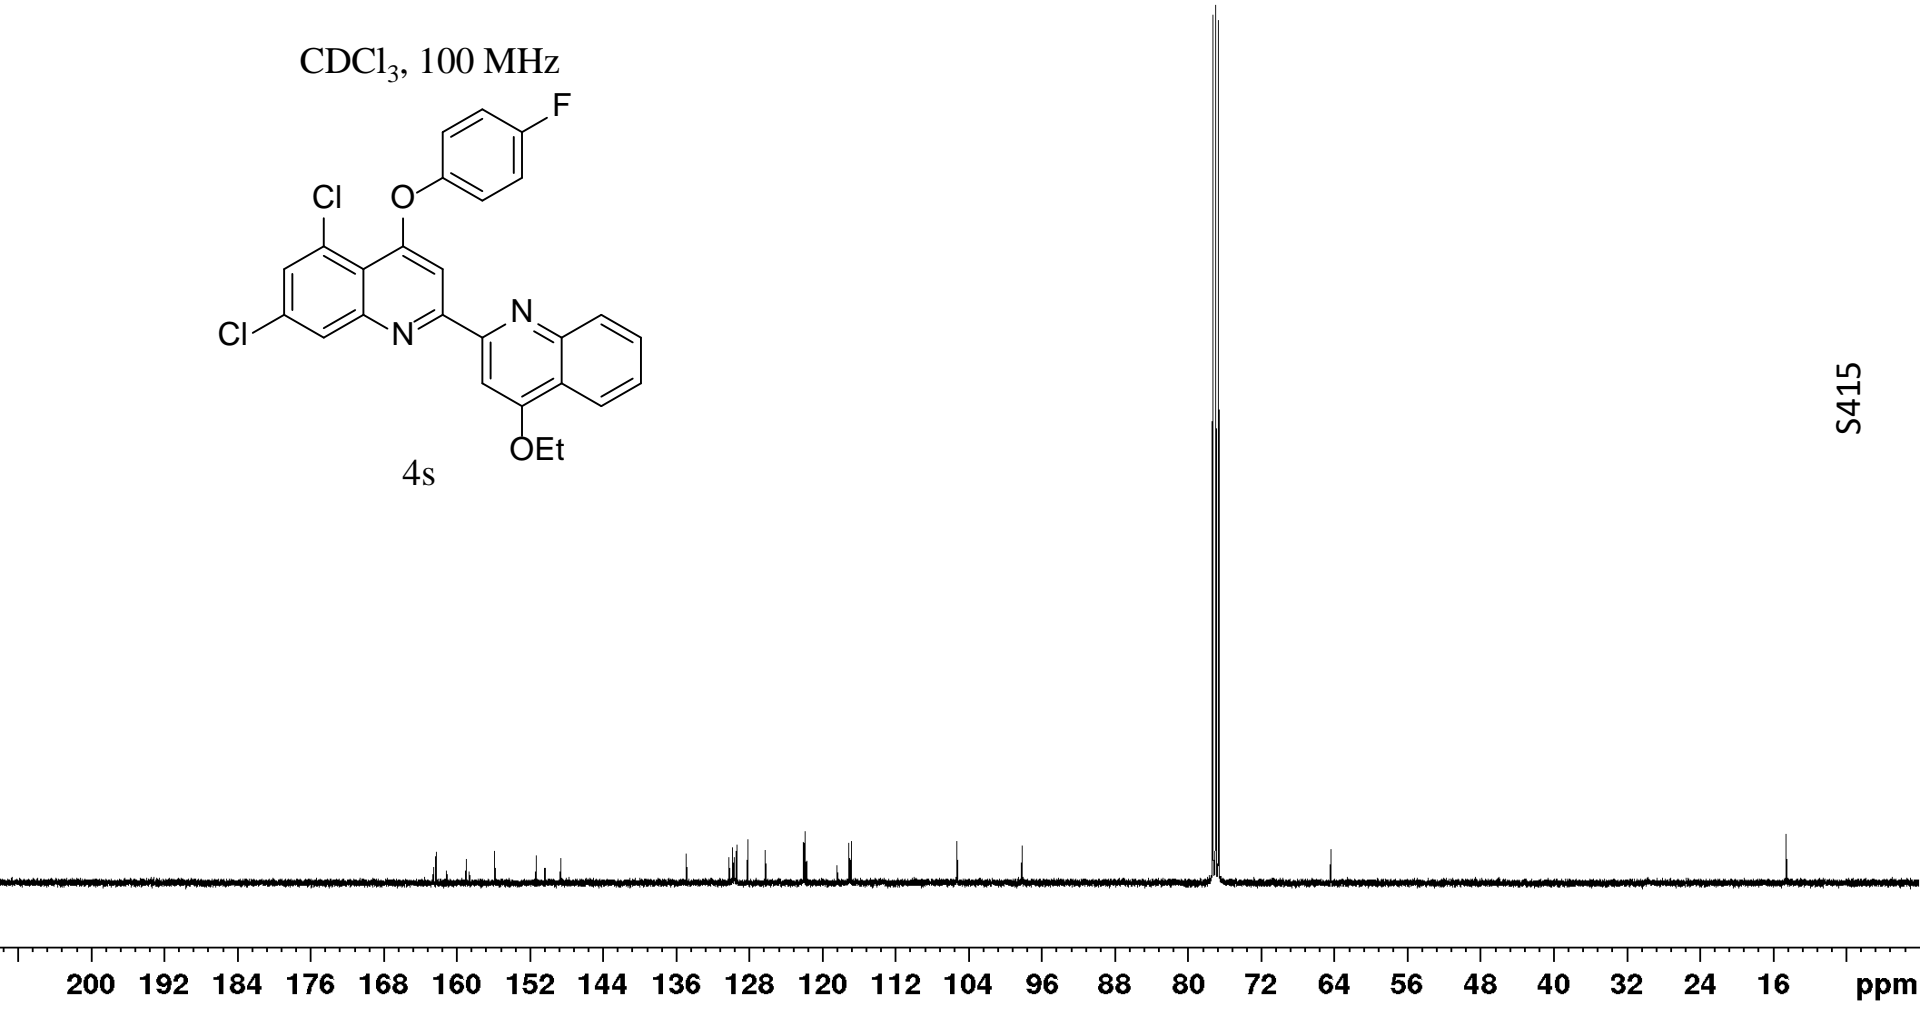

S415

CDCl<sub>3</sub>, 365 MHz

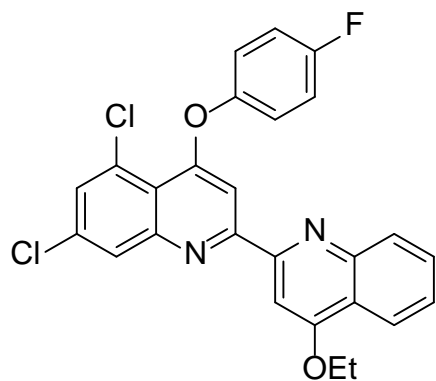

4s

-117.54  
-117.55  
-117.56  
-117.58  
-117.58  
-117.60

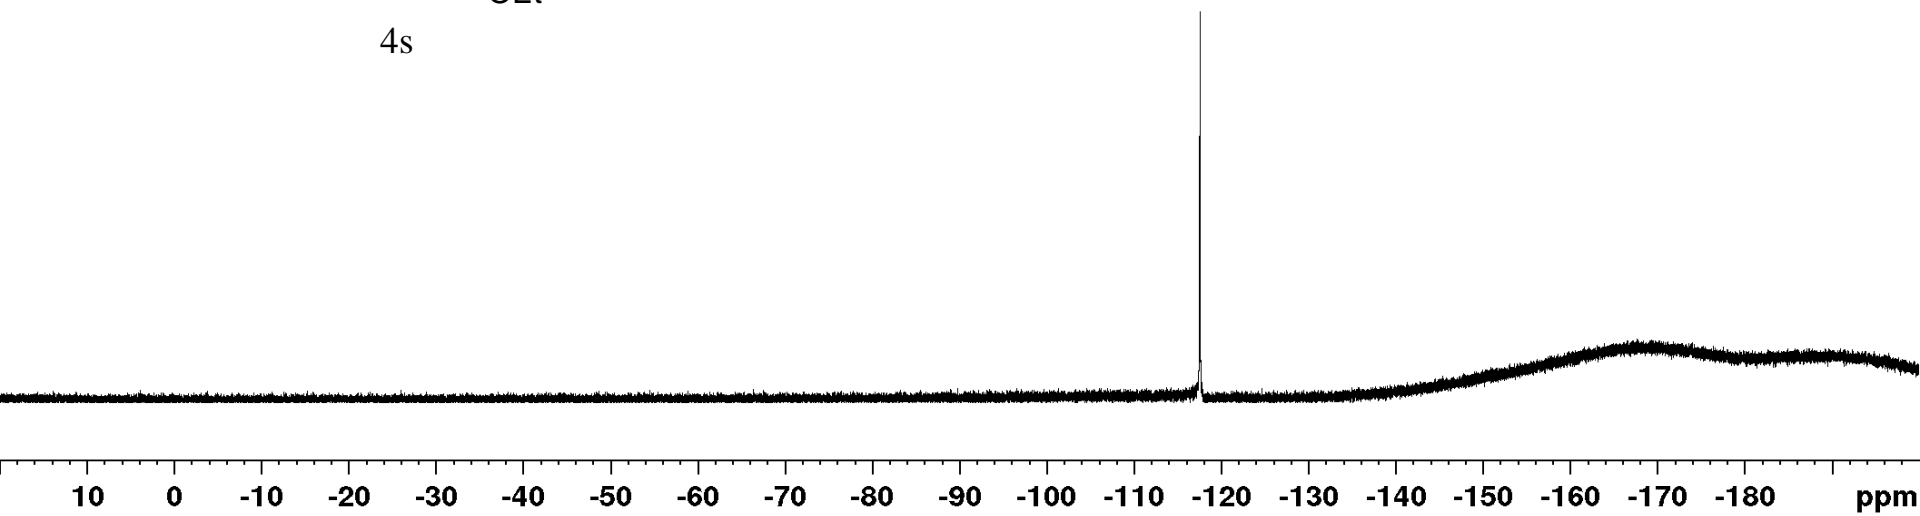

S416



8.64  
7.97  
7.95  
7.65  
7.63  
7.61  
7.58  
7.56  
7.53  
7.51  
7.46  
7.35  
6.89  
6.87  
6.85

3.00  
2.67  
2.61

CDCl<sub>3</sub>, 400 MHz

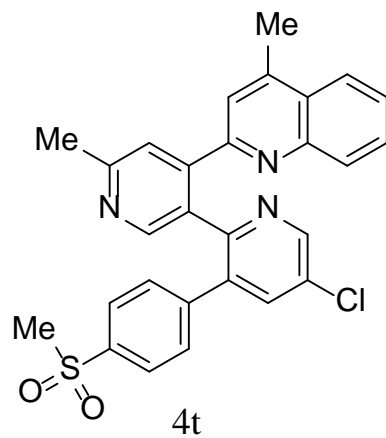

S417

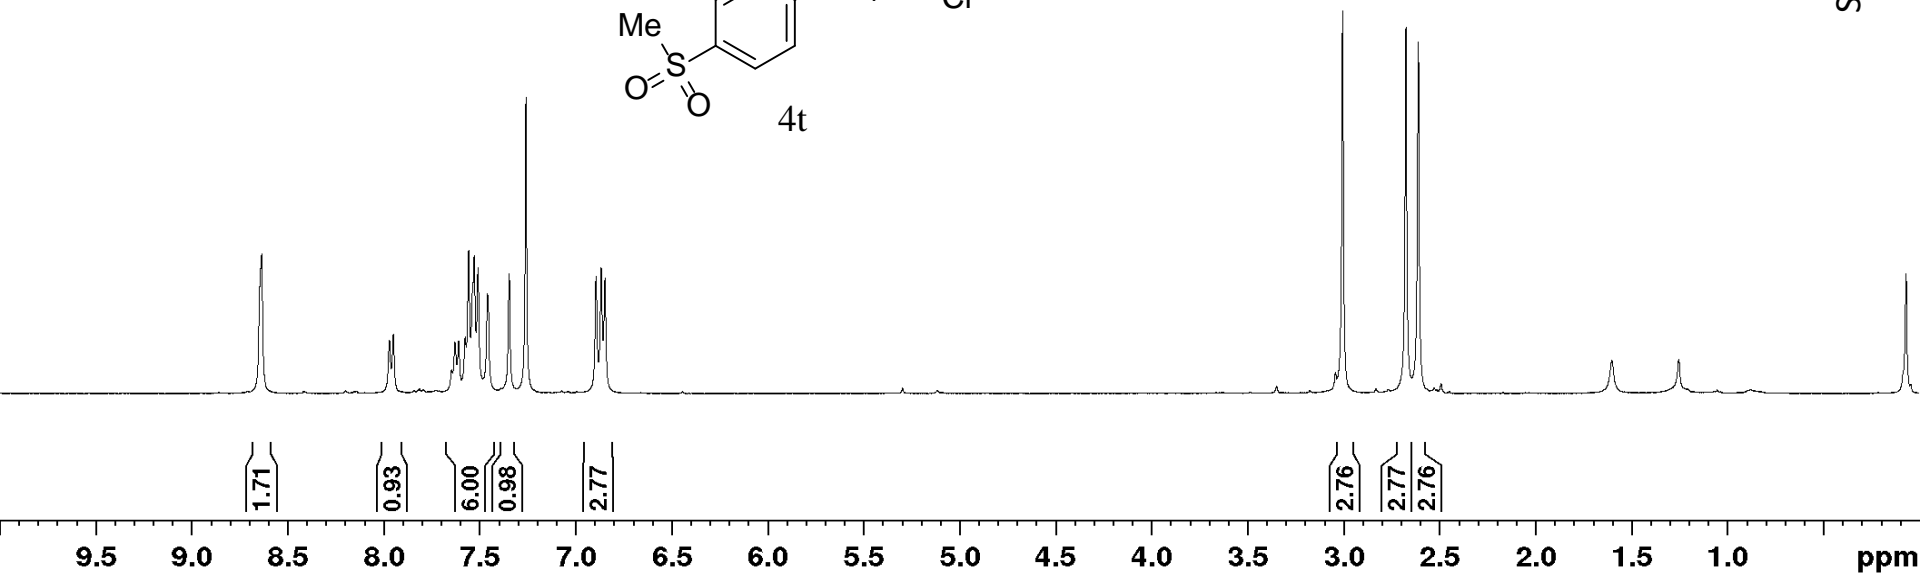

159.16  
154.96  
154.07  
151.54  
147.94  
147.32  
147.11  
145.21  
143.07  
139.47  
136.41  
136.03  
130.77  
130.59  
130.02  
129.61  
129.56  
127.08  
126.92  
126.75  
123.57  
122.81  
120.92

— 44.39

— 24.42

— 18.78

CDCl<sub>3</sub>, 100 MHz

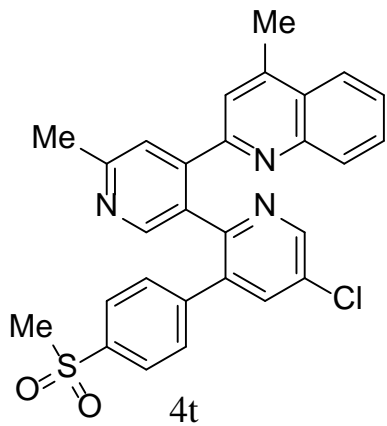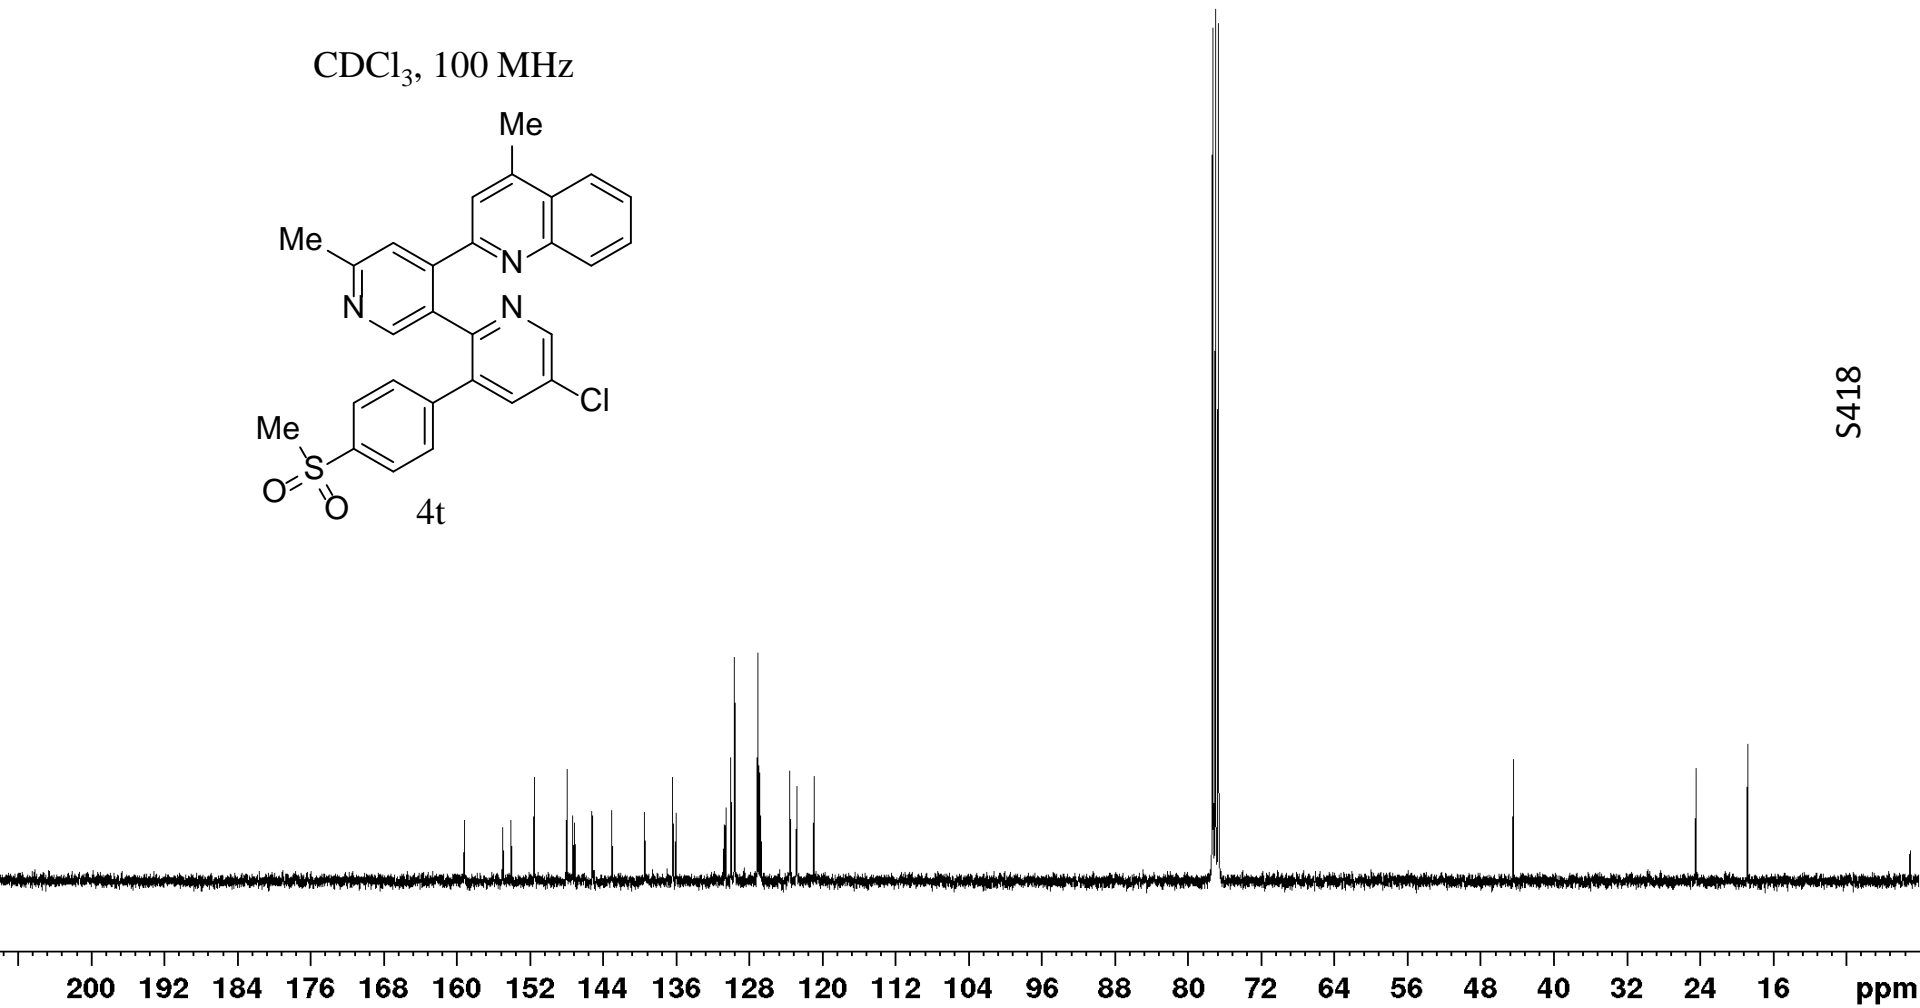

S418

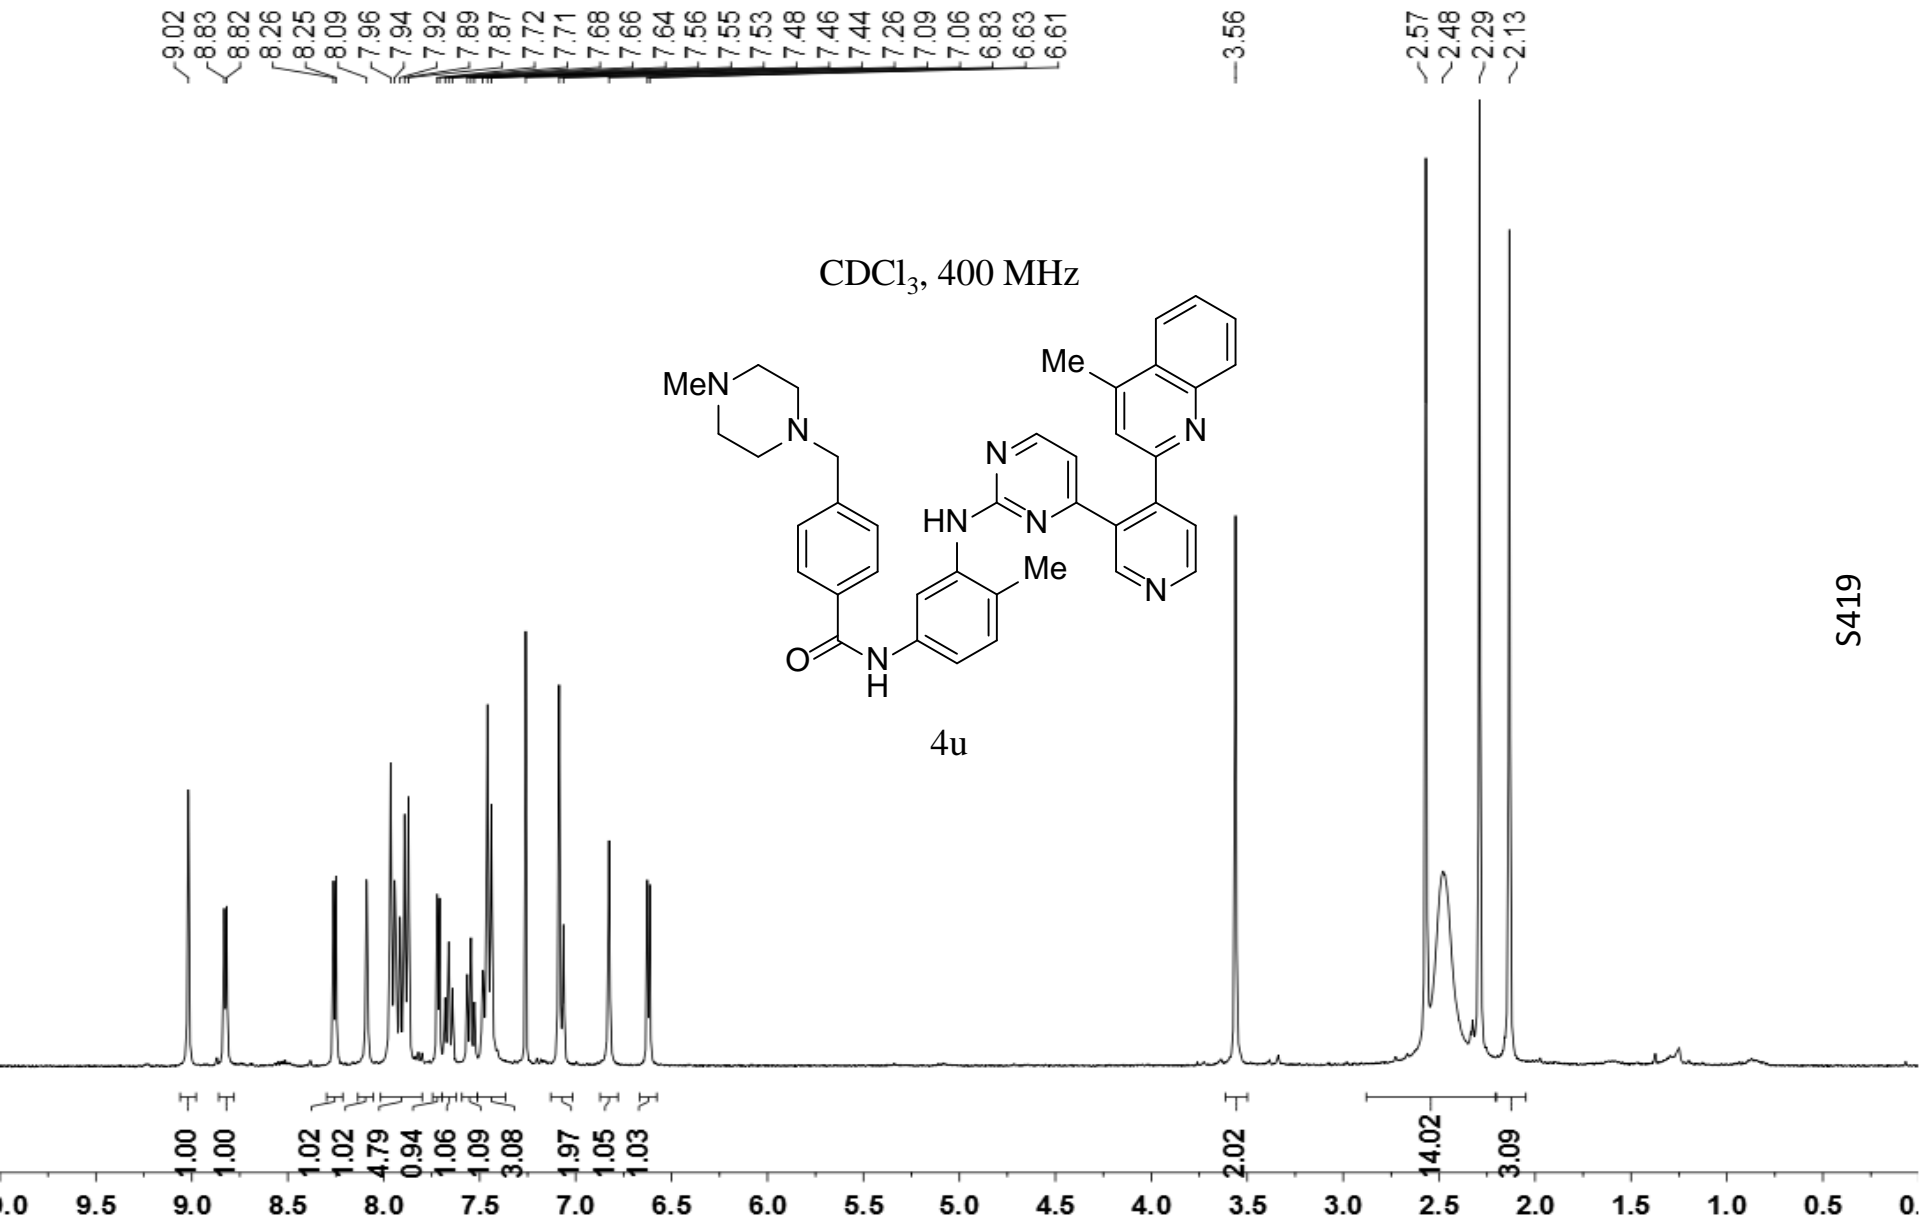

S419

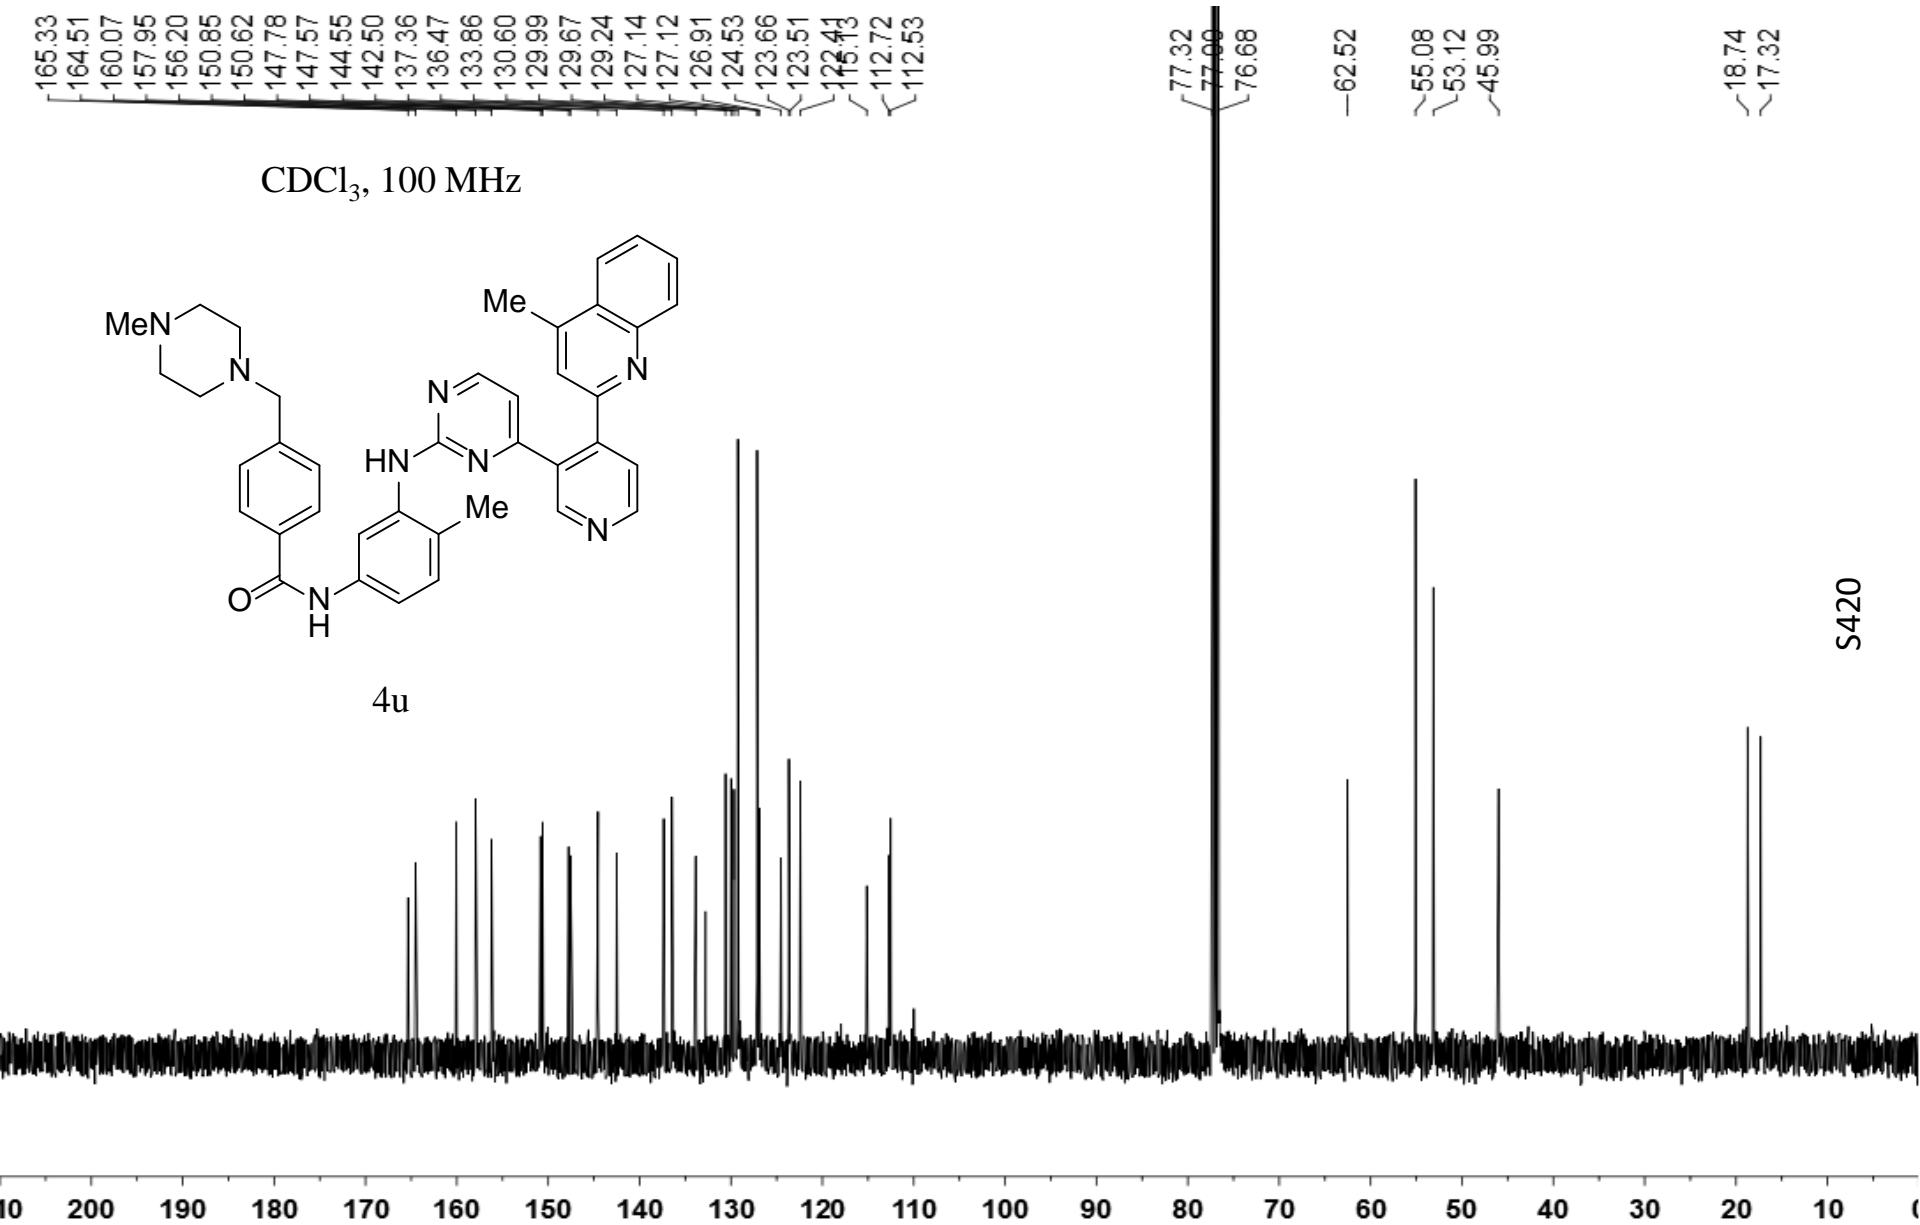

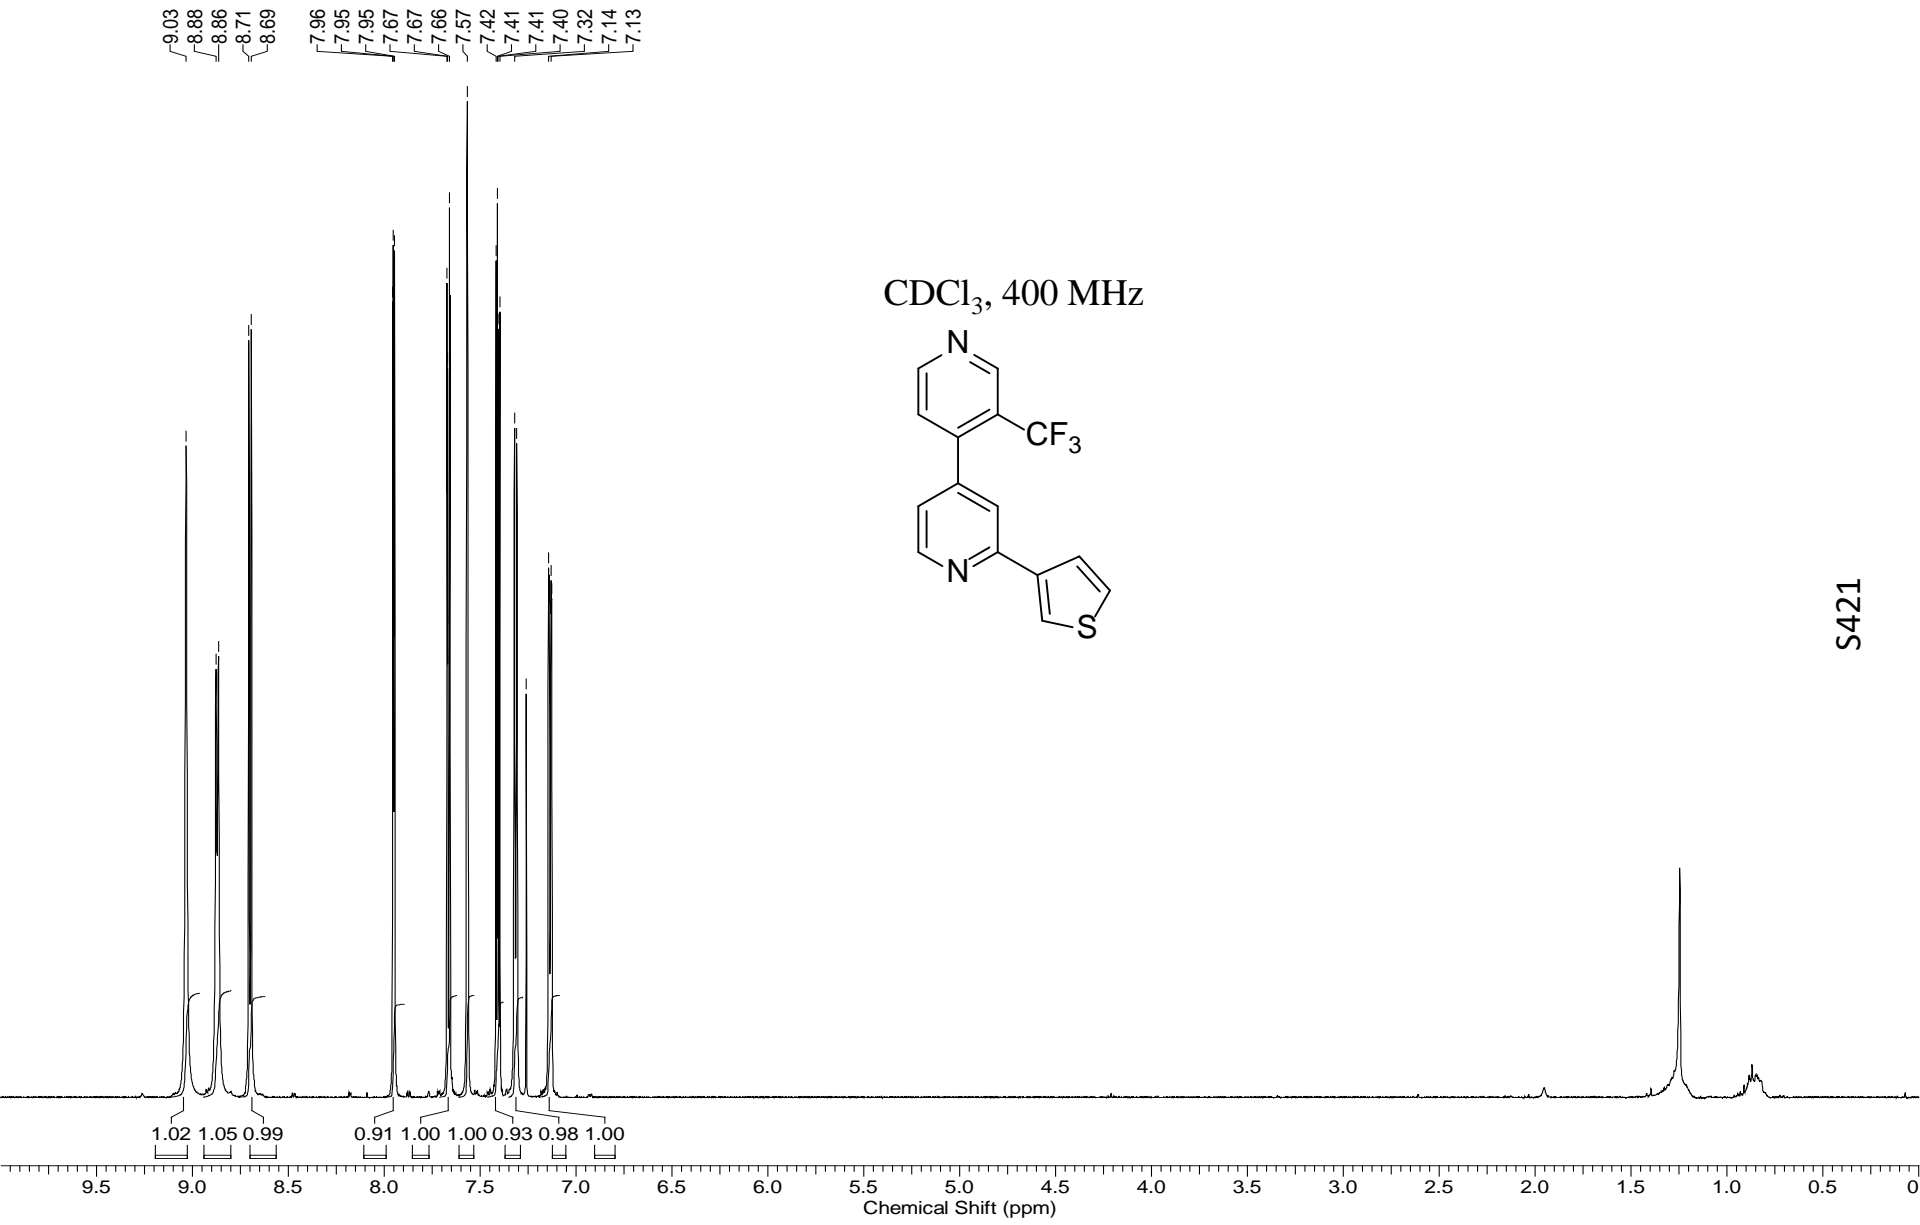

S421

CDCl<sub>3</sub>, 100 MHz

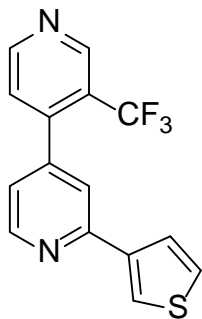

153.57  
153.00  
149.56  
147.60  
147.49  
147.42  
146.54  
145.53  
141.45  
127.36  
126.59  
126.04  
125.02  
124.63  
124.27  
121.91  
120.94  
119.42  
119.17

77.32  
77.00  
76.68

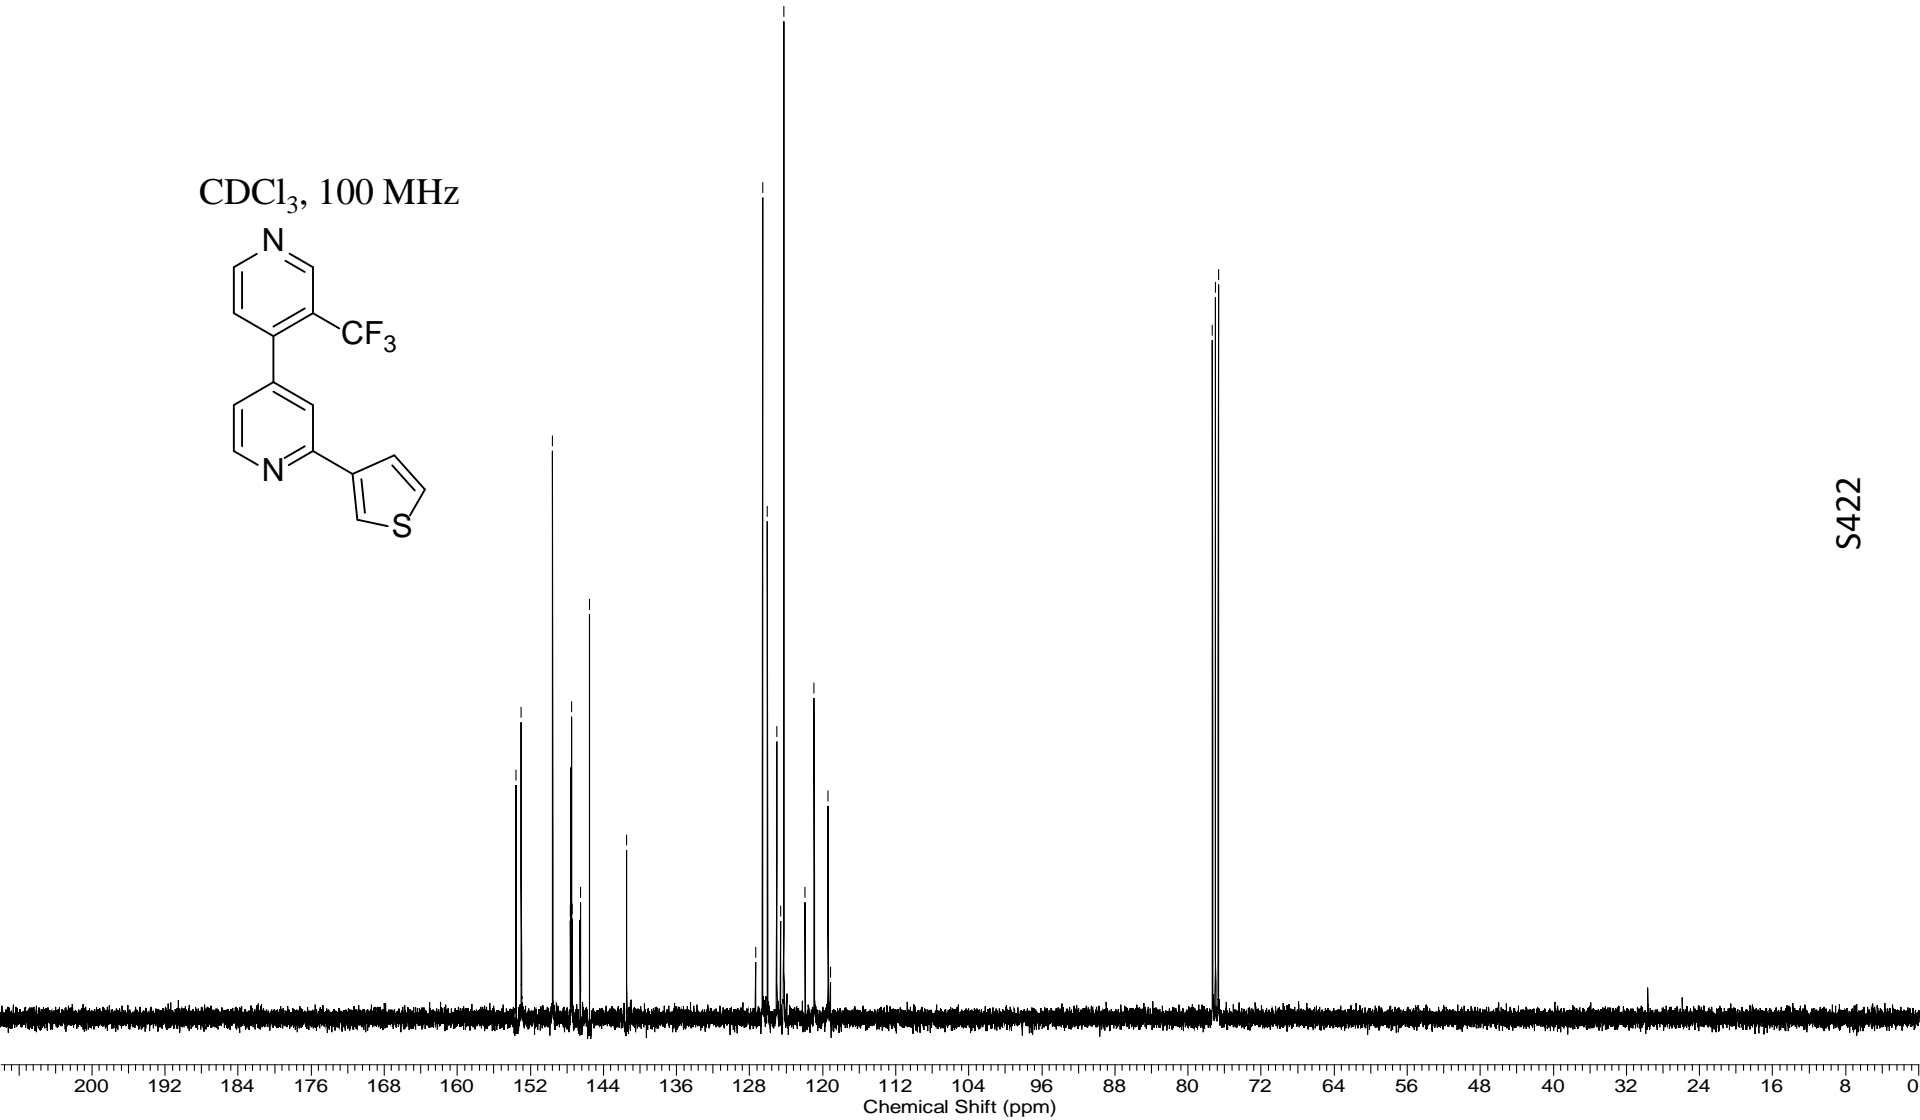

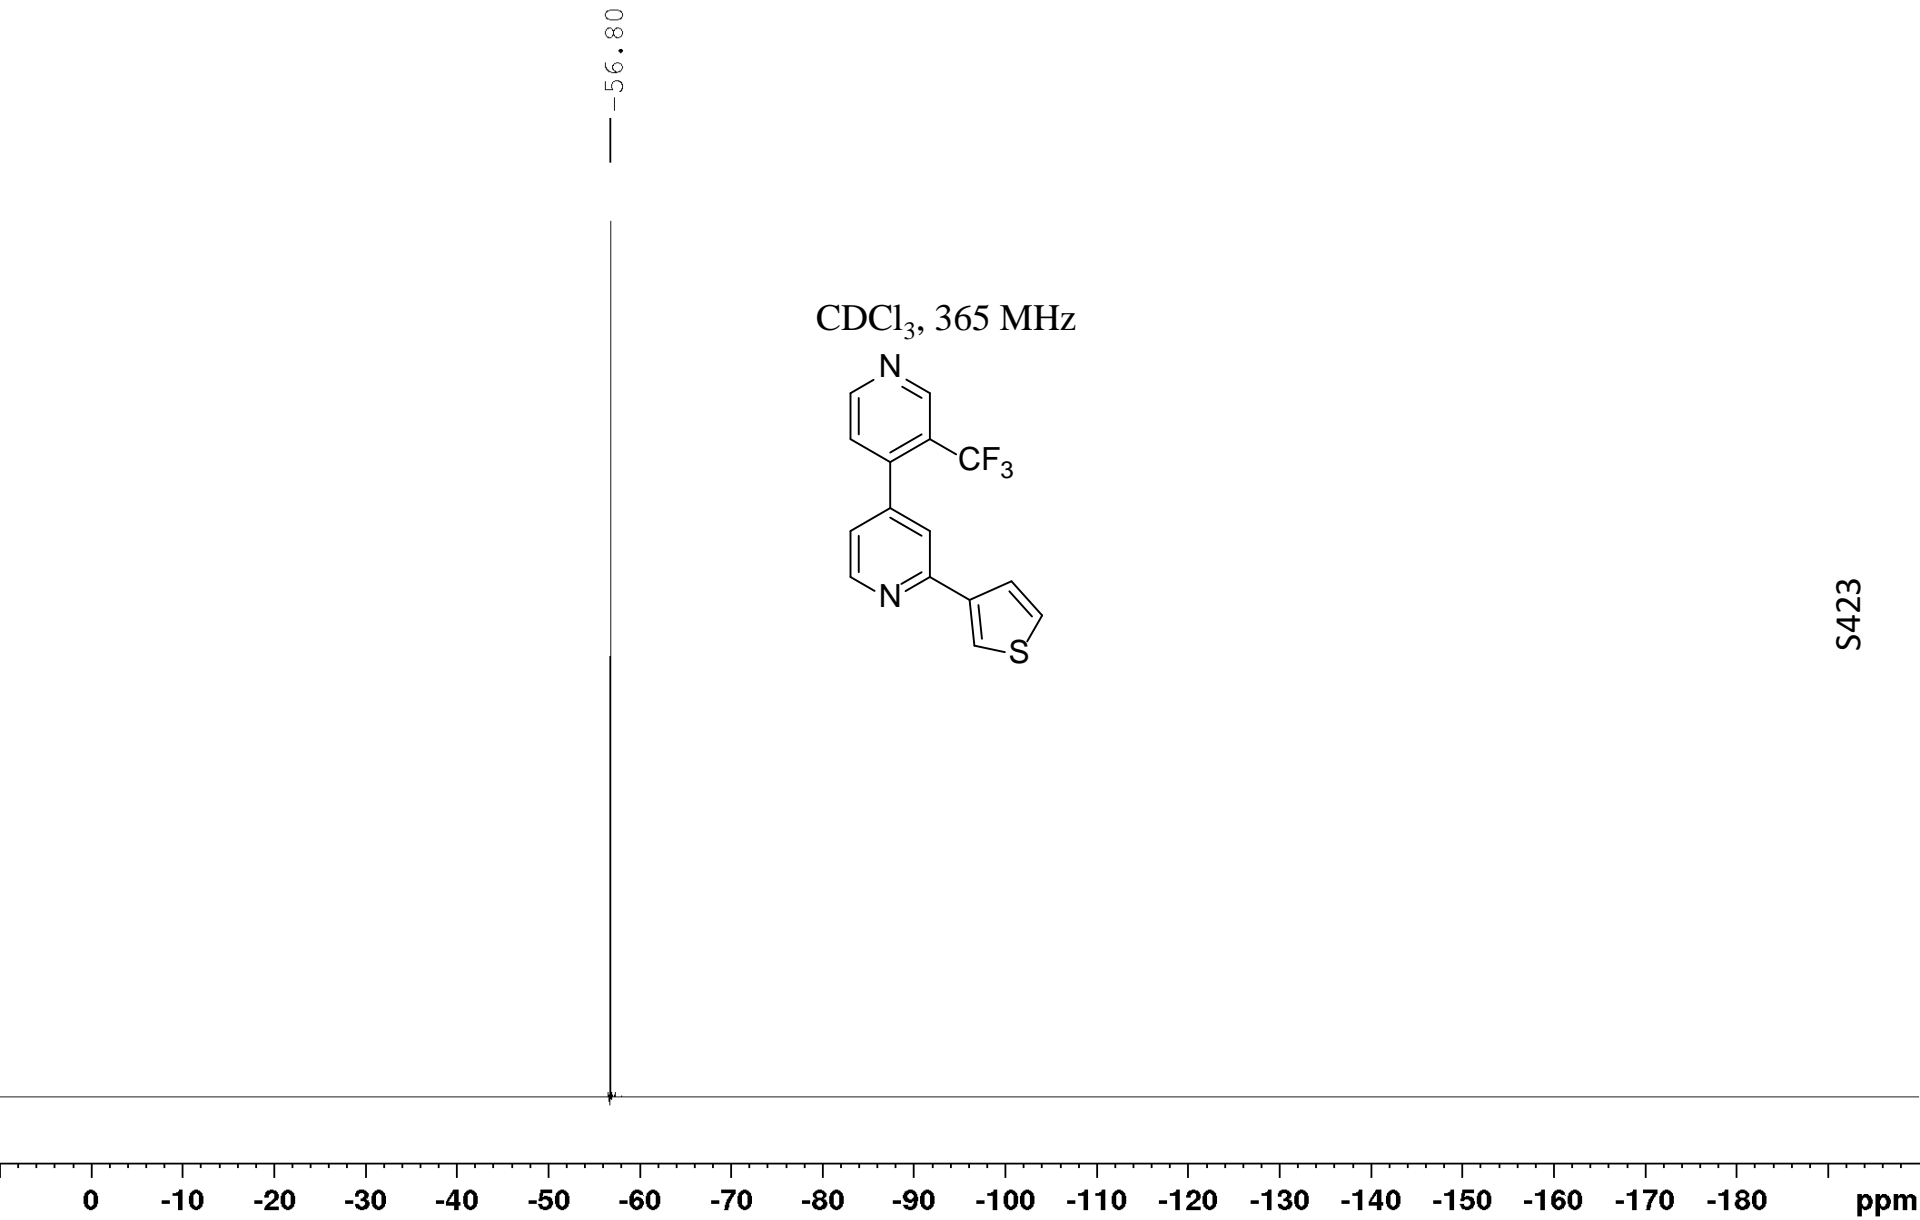

S423

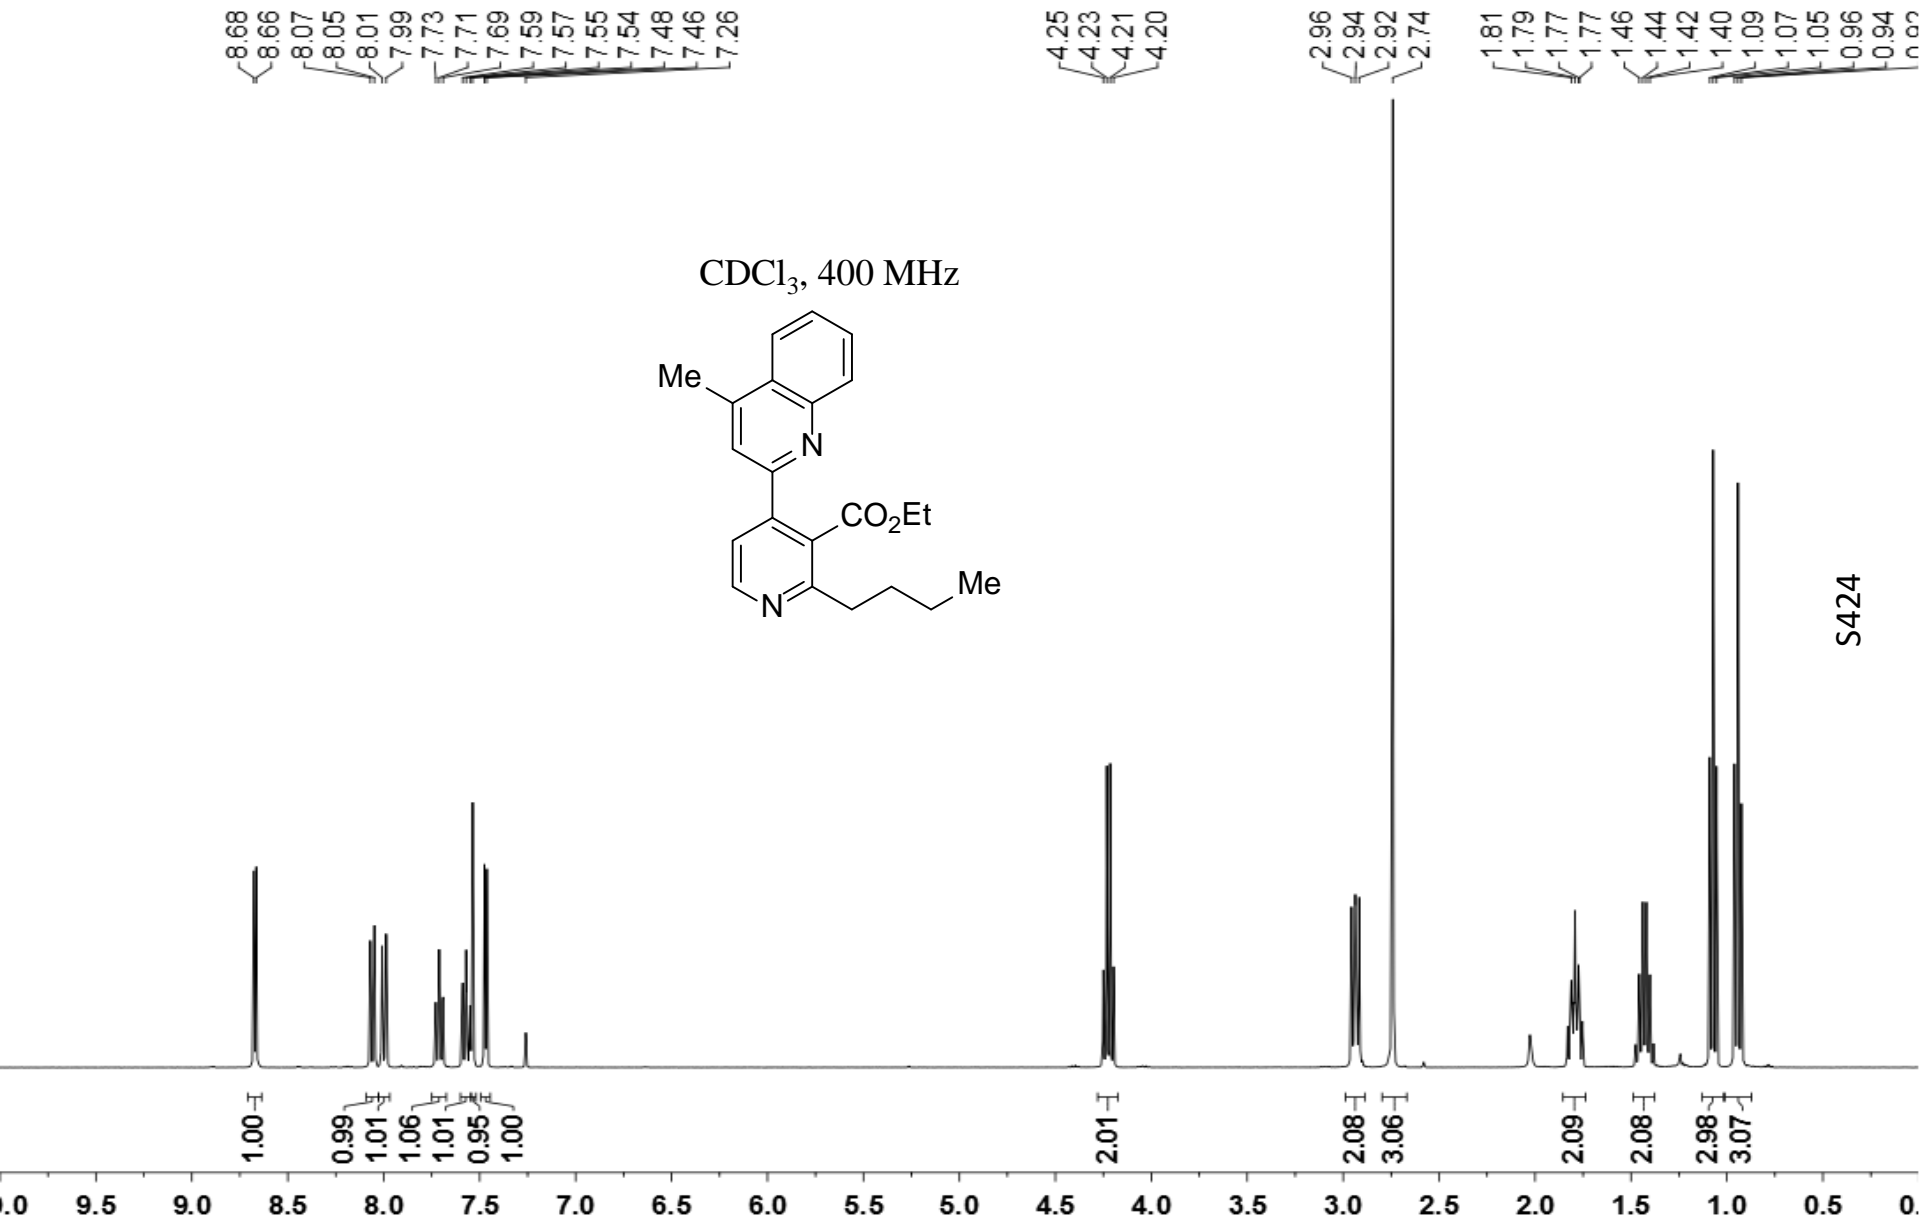

S424



CDCl<sub>3</sub>, 100 MHz

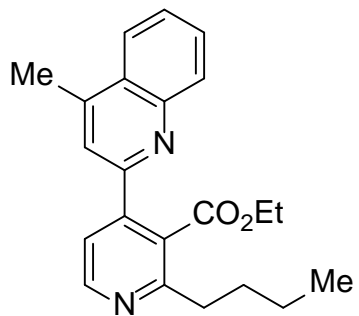

168.89  
160.31  
154.90  
149.88  
147.42  
146.25  
145.49  
130.09  
129.69  
128.07  
127.34  
126.90  
123.63  
120.46  
120.41

77.32  
77.00  
76.68

61.22

35.94  
31.96

22.72  
18.87  
13.86  
13.85

S425

10 200 190 180 170 160 150 140 130 120 110 100 90 80 70 60 50 40 30 20 10

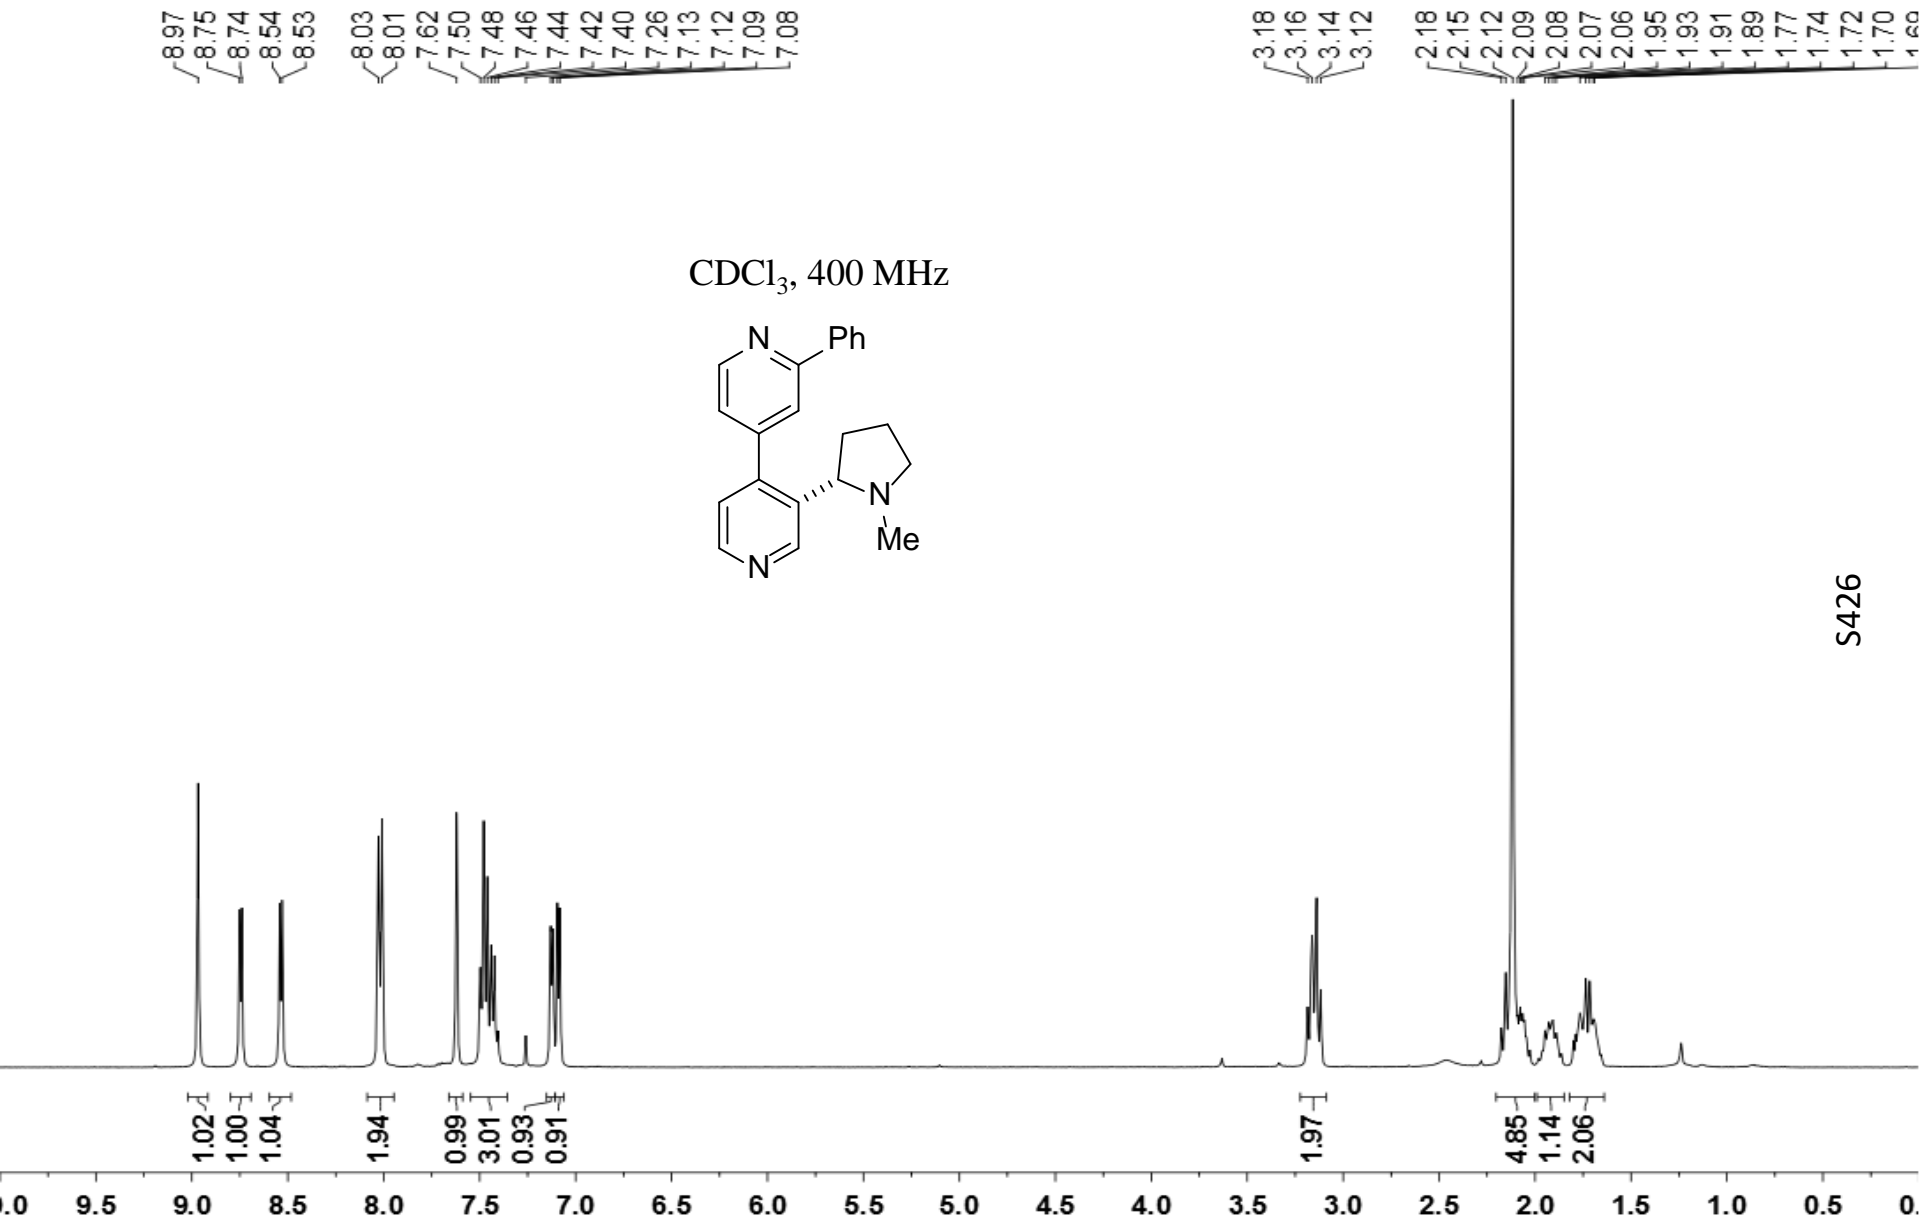

S426

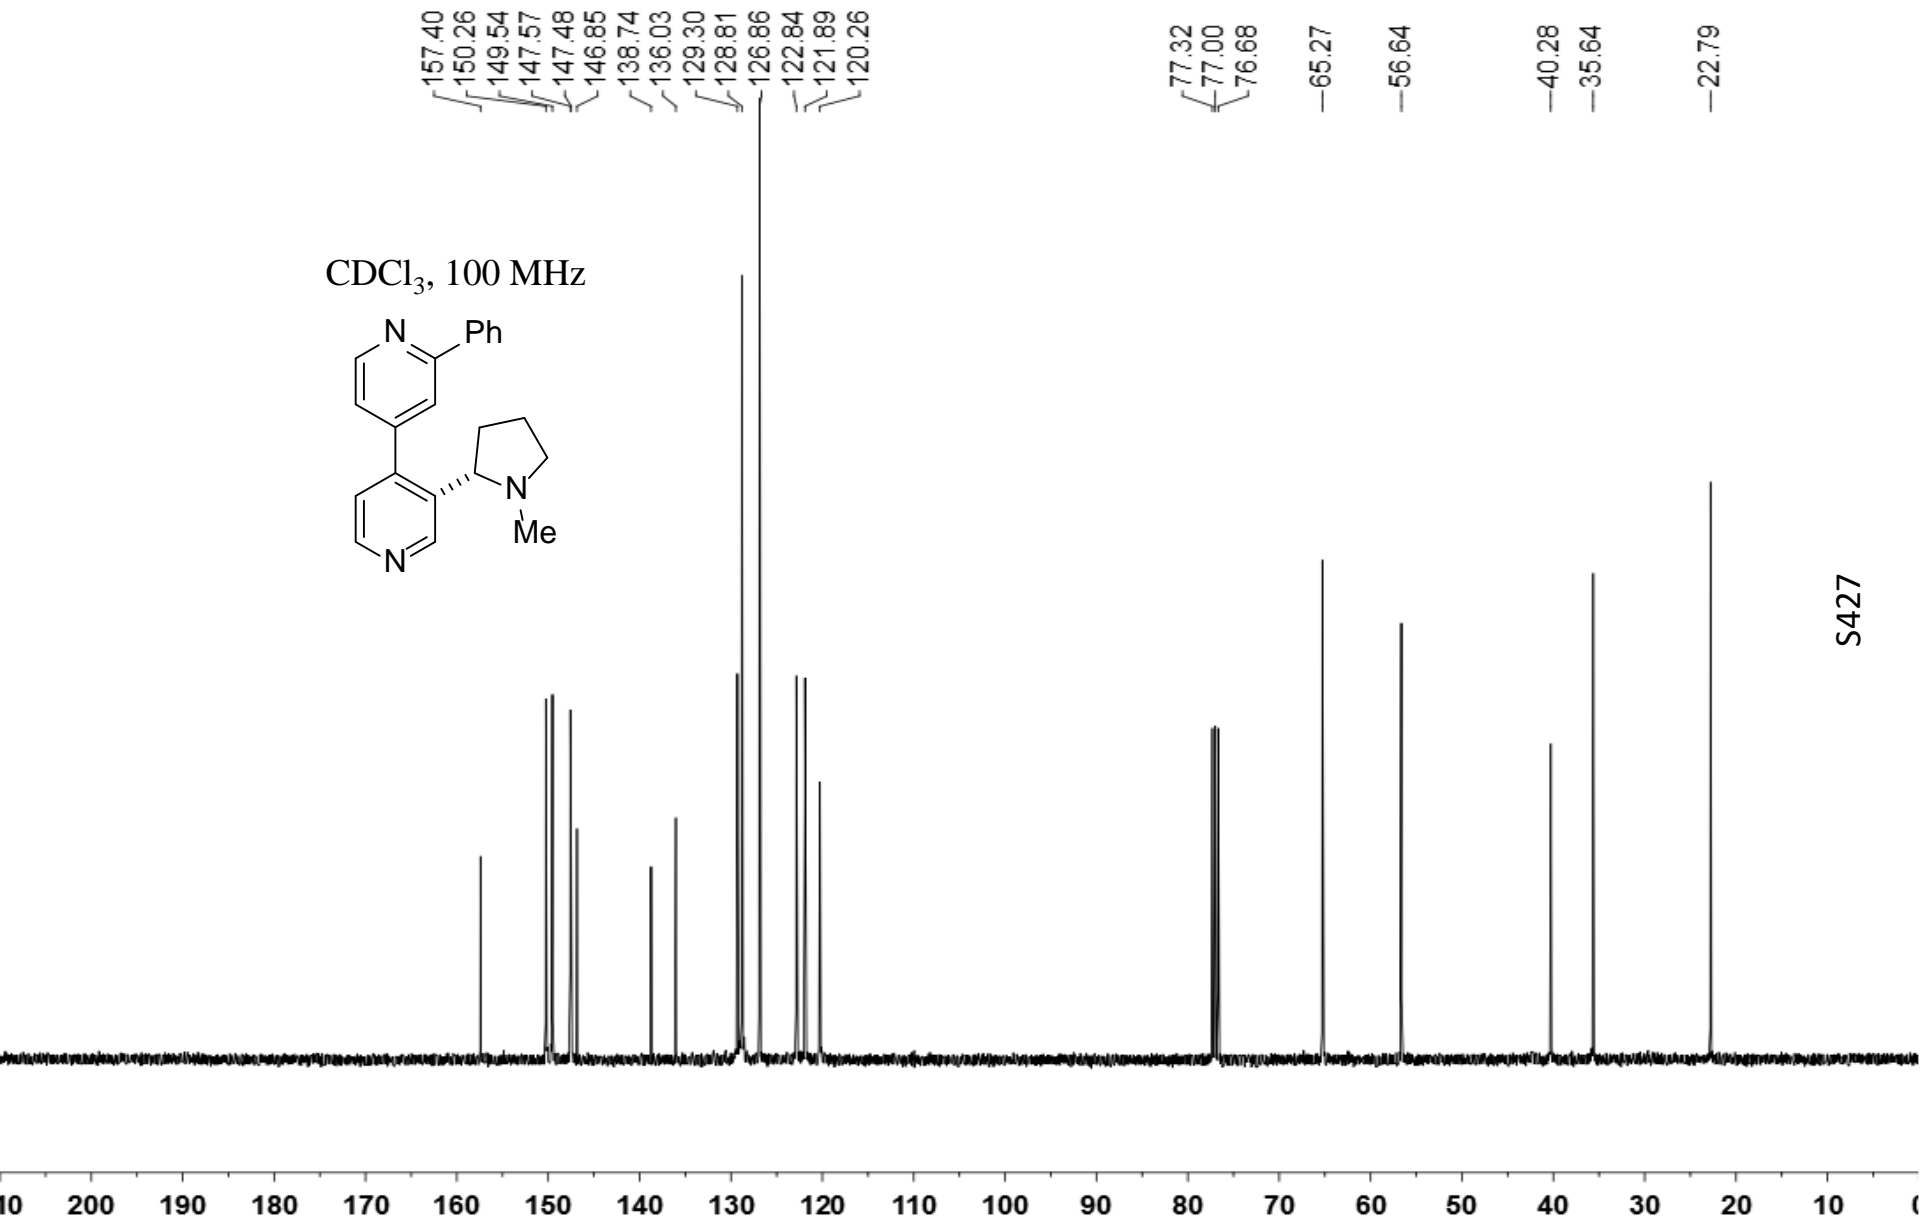

S427

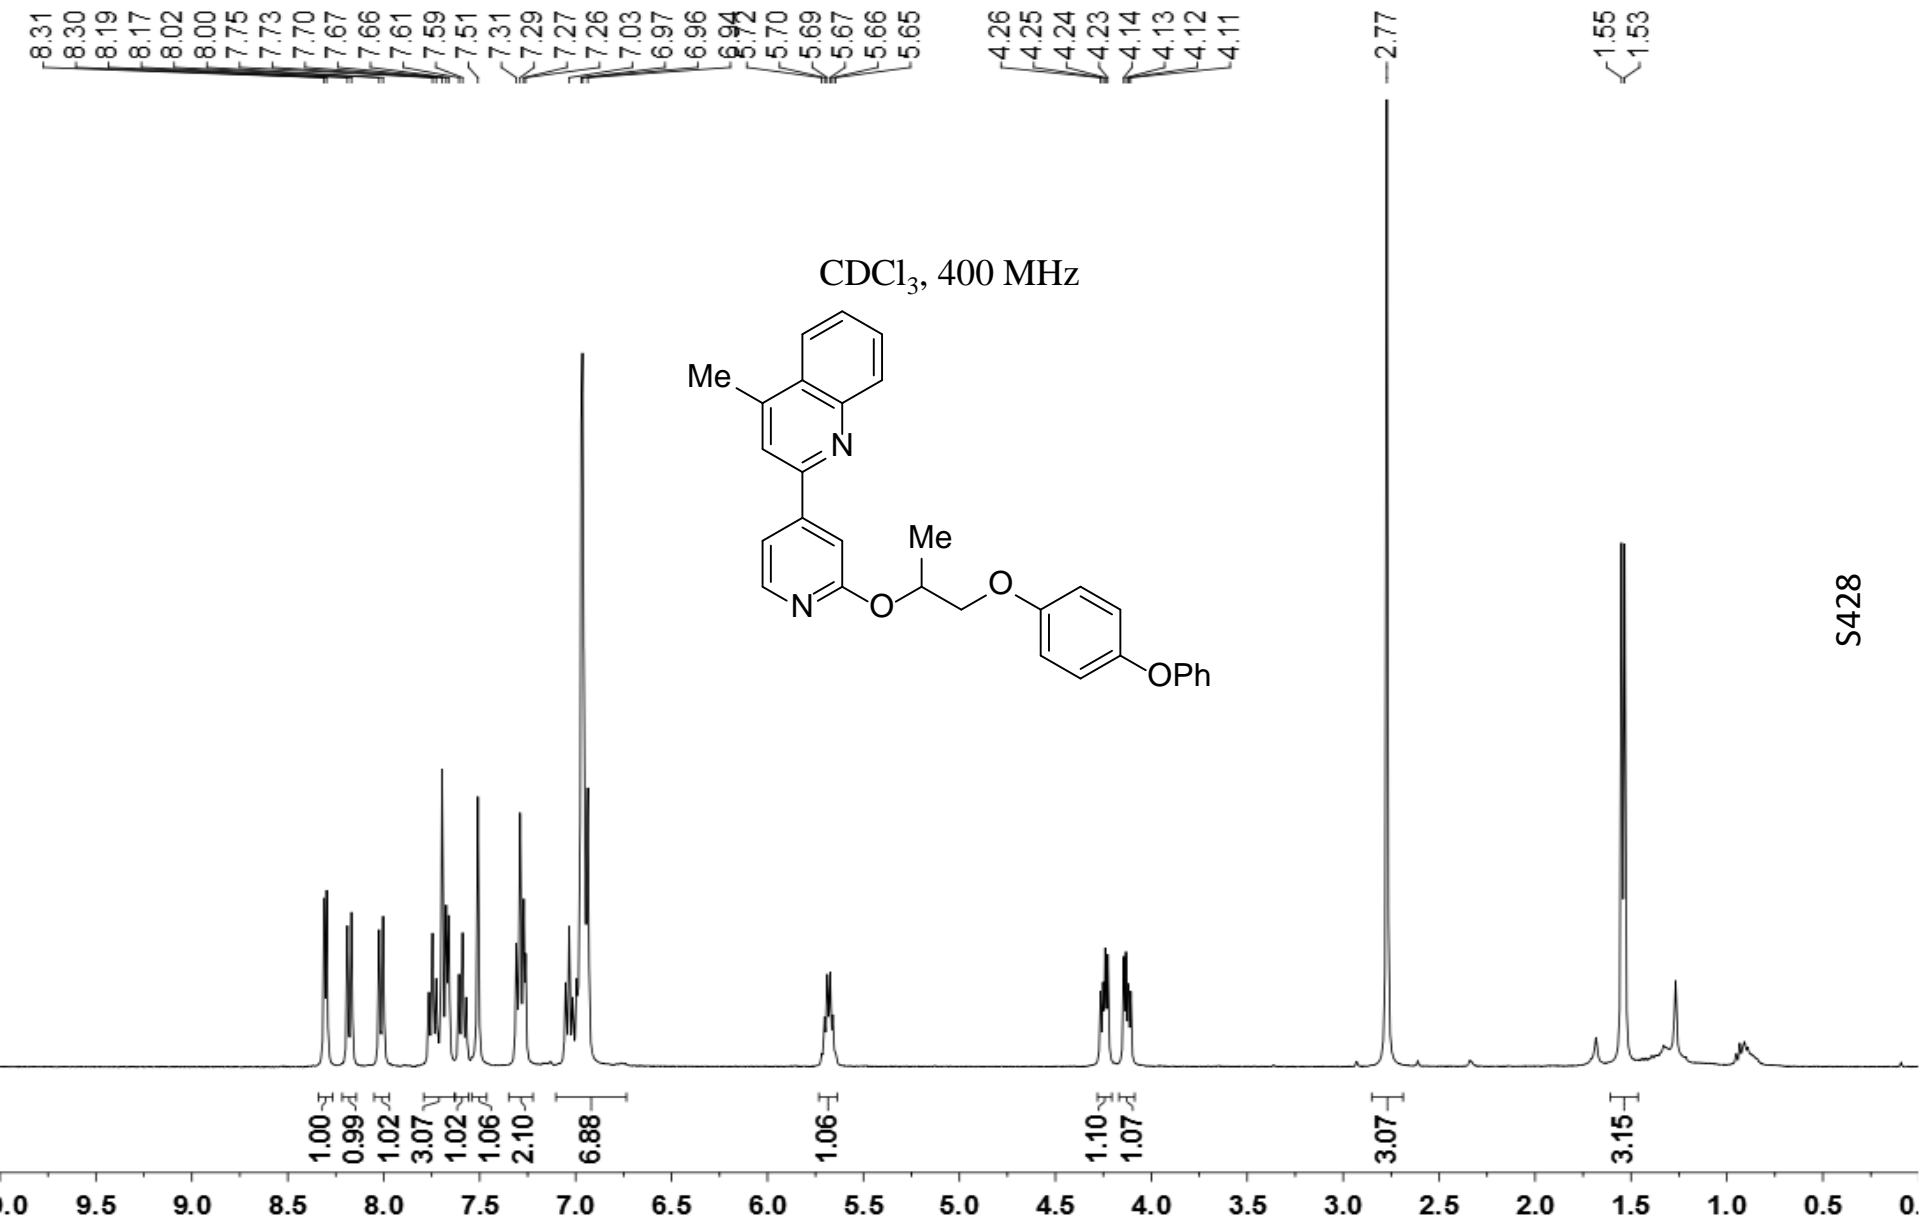

S428

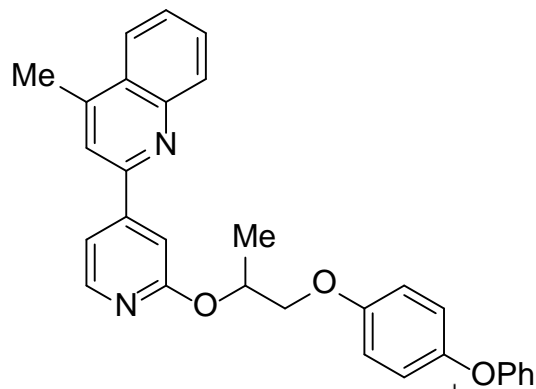

CDCl<sub>3</sub>, 100 MHz

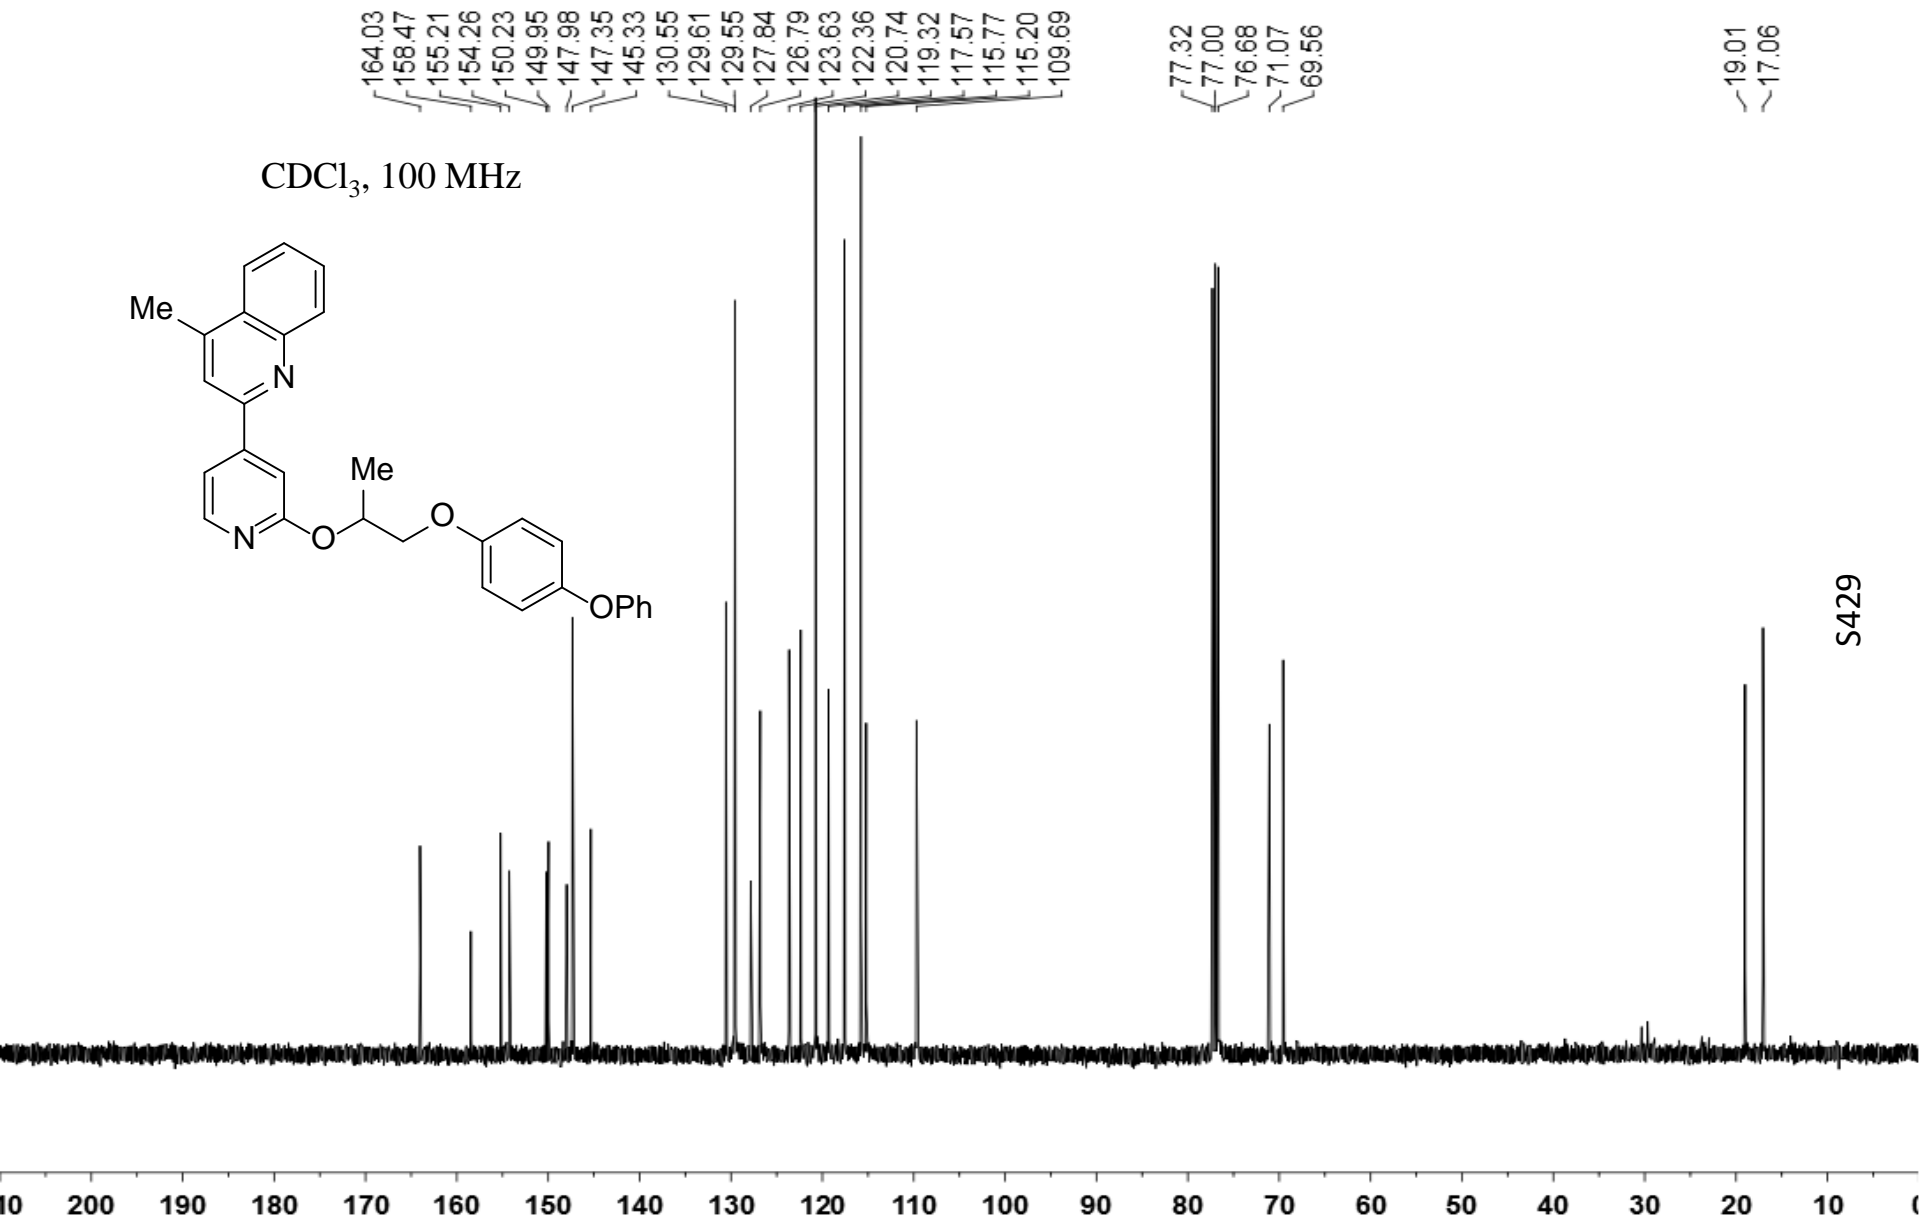

S429

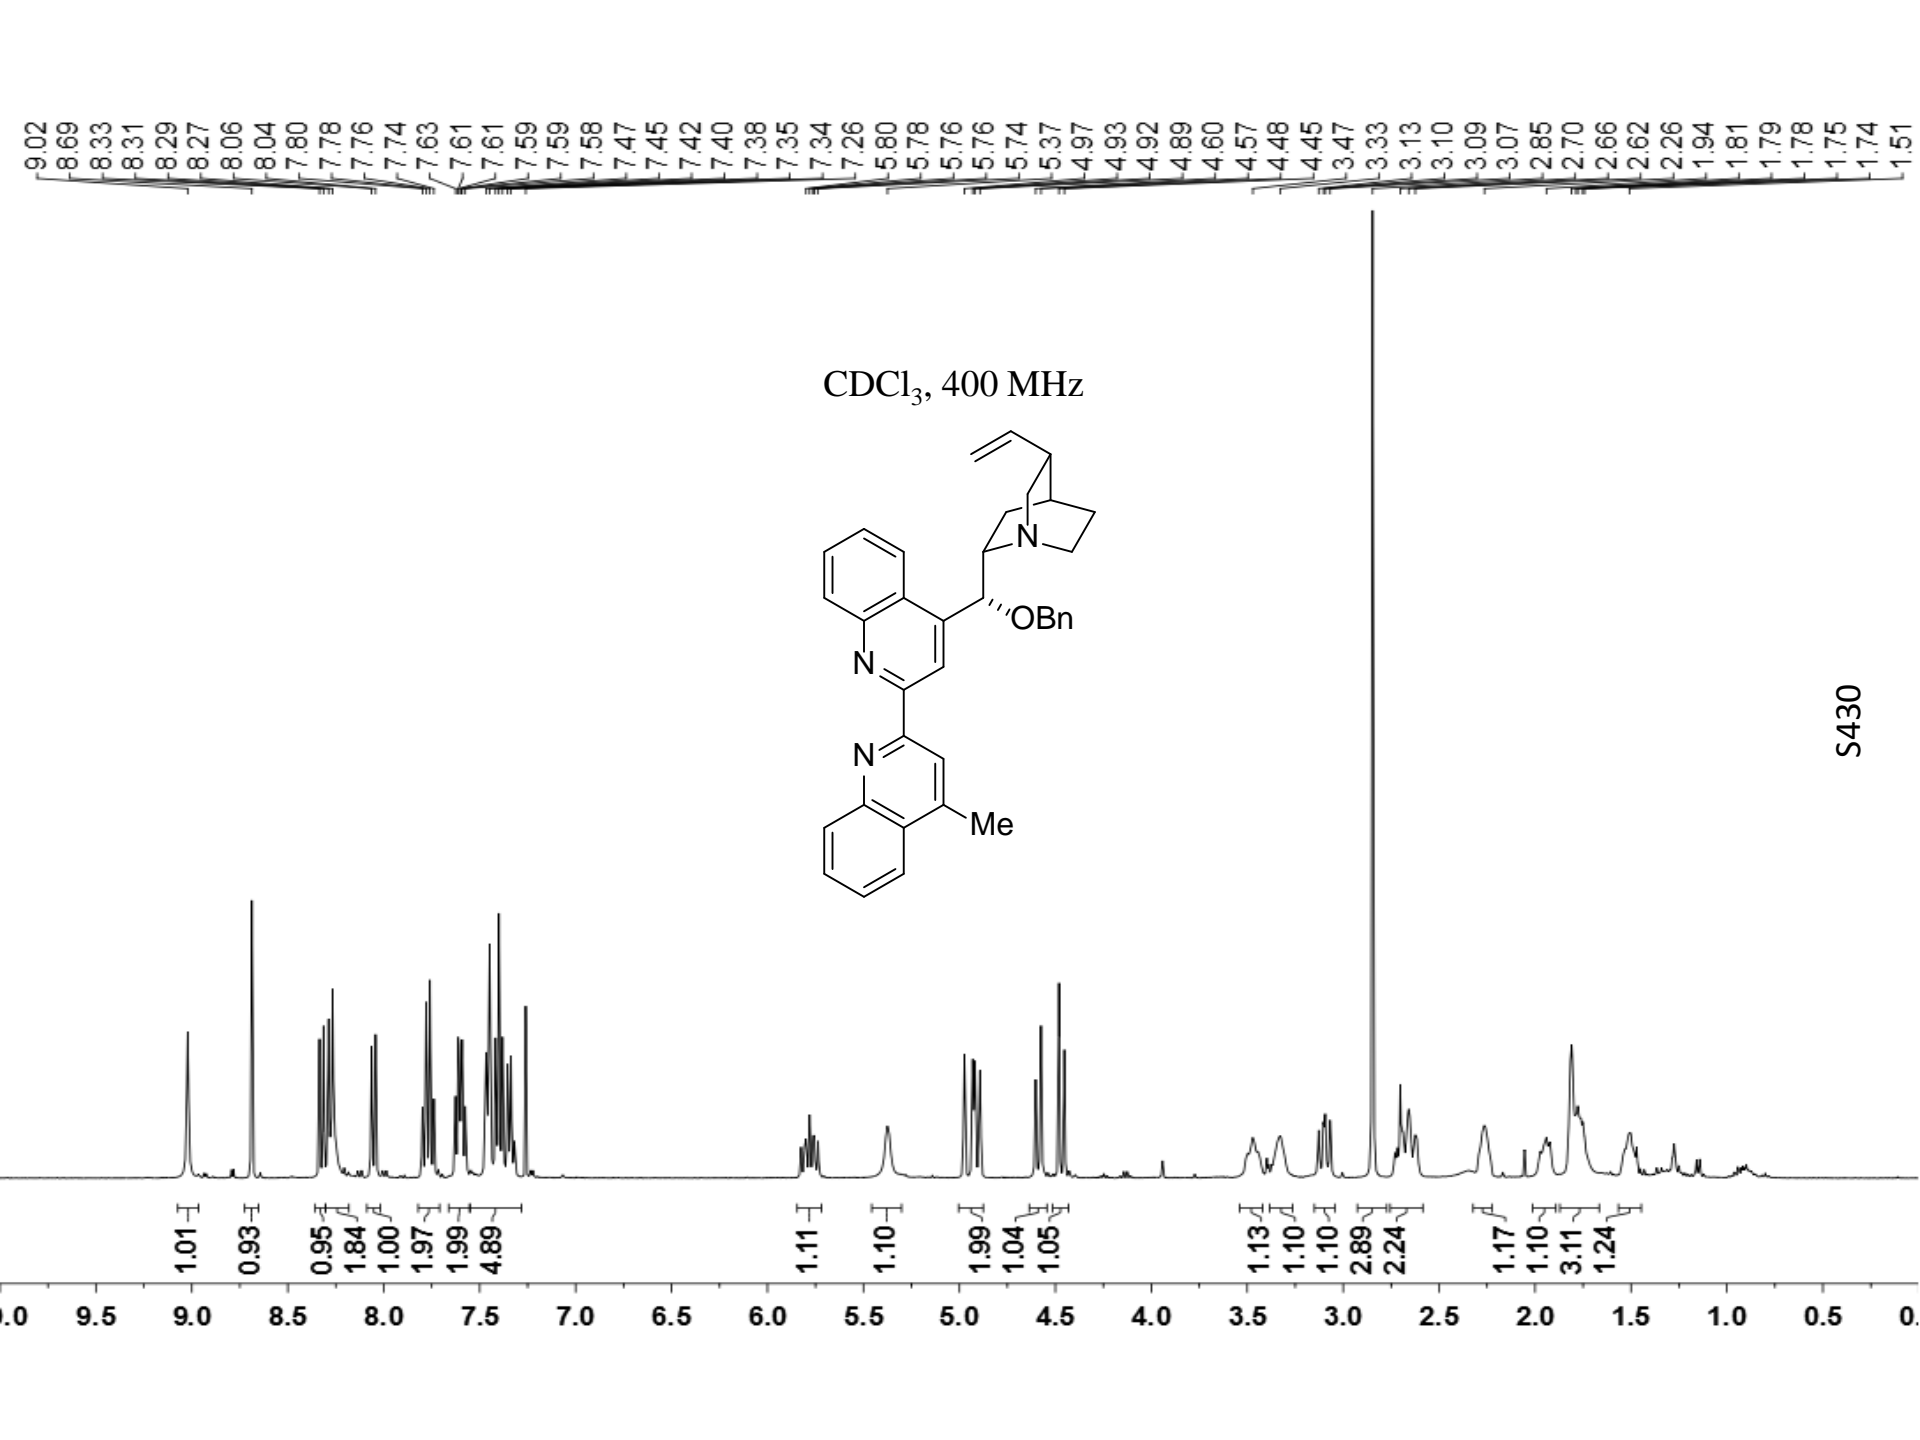

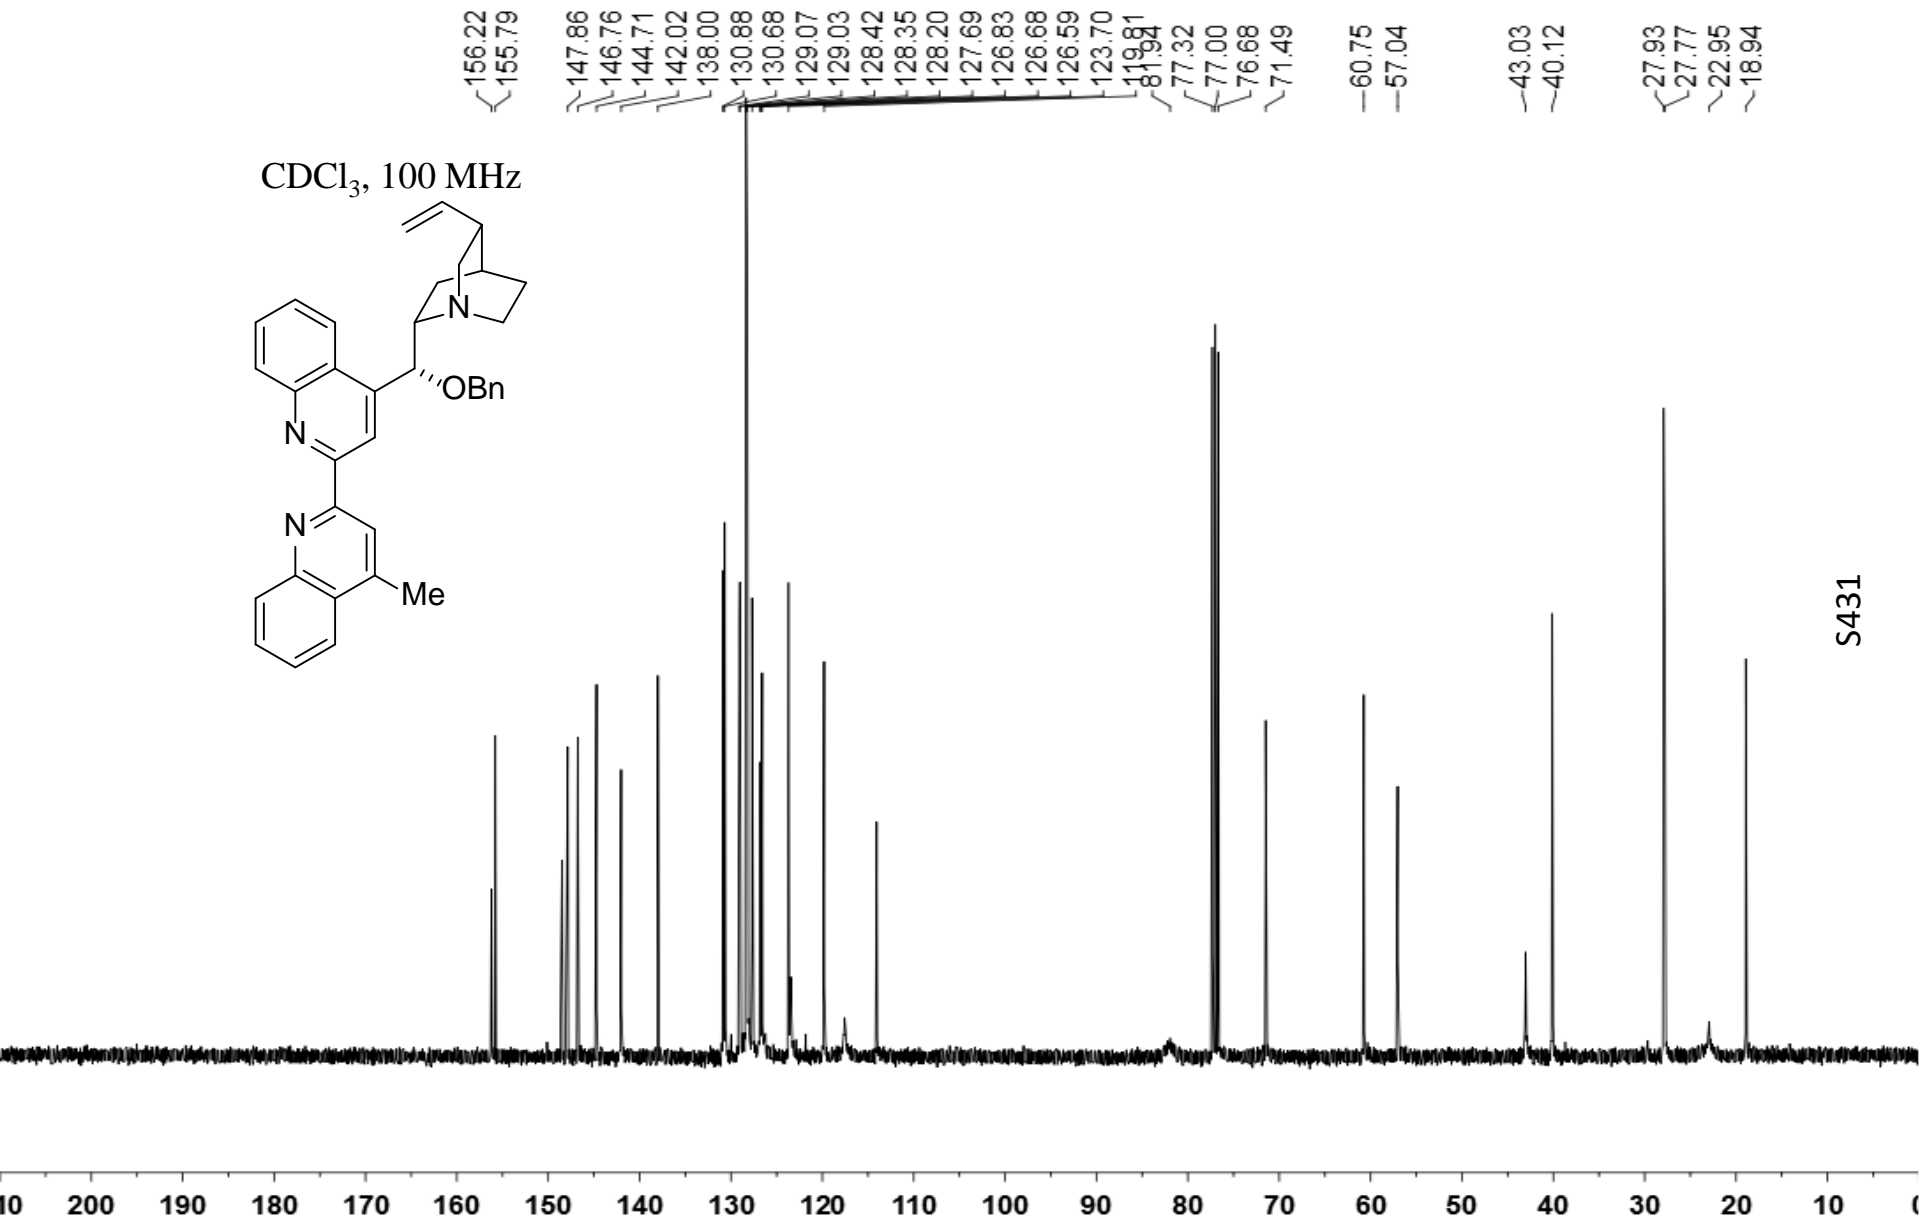

S431

## References

1. D. G. Brown, J. Boström, Analysis of Past and Present Synthetic Methodologies on Medicinal Chemistry: Where have All the New Reactions Gone? *J. Med. Chem.* **59**, 4443–4458 (2016). [doi:10.1021/acs.jmedchem.5b01409](https://doi.org/10.1021/acs.jmedchem.5b01409) [Medline](#)
2. S. D. Roughley, A. M. Jordan, The medicinal chemist's toolbox: An analysis of reactions used in the pursuit of drug candidates. *J. Med. Chem.* **54**, 3451–3479 (2011). [doi:10.1021/jm200187y](https://doi.org/10.1021/jm200187y) [Medline](#)
3. R. Capdeville, E. Buchdunger, J. Zimmermann, A. Matter, Glivec (STI571, imatinib), a rationally developed, targeted anticancer drug. *Nat. Rev. Drug Discov.* **1**, 493–502 (2002). [doi:10.1038/nrd839](https://doi.org/10.1038/nrd839) [Medline](#)
4. A. J. Roecker, S. P. Mercer, J. D. Schreier, C. D. Cox, M. E. Fraley, J. T. Steen, W. Lemaire, J. G. Bruno, C. M. Harrell, S. L. Garson, A. L. Gotter, S. V. Fox, J. Stevens, P. L. Tannenbaum, T. Prueksaritanont, T. D. Cabalu, D. Cui, J. Stellabott, G. D. Hartman, S. D. Young, C. J. Winrow, J. J. Renger, P. J. Coleman, Discovery of 5''-chloro-*N*-[(5,6-dimethoxy-pyridin-2-yl)methyl]-2,2':5',3''-terpyridine-3'-carboxamide (MK-1064): A selective orexin 2 receptor antagonist (2-SORA) for the treatment of insomnia. *ChemMedChem* **9**, 311–322 (2014). [doi:10.1002/cmdc.201300447](https://doi.org/10.1002/cmdc.201300447) [Medline](#)
5. S. D. Martina, K. S. Vesta, T. L. Ripley, Etoricoxib: A highly selective COX-2 inhibitor. *Ann. Pharmacother.* **39**, 854–862 (2005). [doi:10.1345/aph.1E543](https://doi.org/10.1345/aph.1E543) [Medline](#)
6. M. L. Crawley, B. M. Trost, *Applications of Transition Metal Catalysts in Drug Discovery and Development: An Industrial Perspective* (Wiley, 2012), pp. 25–96.
7. A. de Meijere, F. Diederich, *Metal-Catalyzed Cross-Coupling Reactions* (Wiley-VCH, ed. 2, 2004).
8. J. Hassan, M. Sévignon, C. Gozzi, E. Schulz, M. Lemaire, Aryl-aryl bond formation one century after the discovery of the Ullmann reaction. *Chem. Rev.* **102**, 1359–1470 (2002). [doi:10.1021/cr000664r](https://doi.org/10.1021/cr000664r) [Medline](#)
9. L.-C. Campeau, K. Fagnou, Applications of and alternatives to  $\pi$ -electron-deficient azine organometallics in metal catalyzed cross-coupling reactions. *Chem. Soc. Rev.* **36**, 1058–1068 (2007). [doi:10.1039/B616082D](https://doi.org/10.1039/B616082D) [Medline](#)
10. D. Zhao, J. You, C. Hu, Recent progress in coupling of two heteroarenes. *Chem. Eur. J.* **17**, 5466–5492 (2011). [doi:10.1002/chem.201003039](https://doi.org/10.1002/chem.201003039) [Medline](#)
11. K. L. Billingsley, K. W. Anderson, S. L. Buchwald, A highly active catalyst for Suzuki-Miyaura cross-coupling reactions of heteroaryl compounds. *Angew. Chem. Int. Ed.* **45**, 3484–3488 (2006). [doi:10.1002/anie.200600493](https://doi.org/10.1002/anie.200600493) [Medline](#)



12. N. Kudo, M. Perseghini, G. C. Fu, A versatile method for Suzuki cross-coupling reactions of nitrogen heterocycles. *Angew. Chem. Int. Ed.* **45**, 1282–1284 (2006). [doi:10.1002/anie.200503479](https://doi.org/10.1002/anie.200503479) [Medline](#)
13. A. S. Guram, X. Wang, E. E. Bunel, M. M. Faul, R. D. Larsen, M. J. Martinelli, New catalysts for Suzuki-Miyaura coupling reactions of heteroatom-substituted heteroaryl chlorides. *J. Org. Chem.* **72**, 5104–5112 (2007). [doi:10.1021/jo070341w](https://doi.org/10.1021/jo070341w) [Medline](#)
14. U. Kiehne, J. Bunzen, A. Lützen, Synthesis of Substituted 2,2'-Bipyridines from 2-Bromo- or 2-Chloropyridines Using Tetrakis(triphenylphosphine)palladium(0) as a Catalyst in a Modified Negishi Cross-Coupling Reaction. *Synthesis* 1061–1069 (2007).
15. T. Markovic, B. N. Roche, D. C. Blakemore, V. Mascitti, M. C. Willis, Pyridine sulfinates as general nucleophilic coupling partners in palladium-catalyzed cross-coupling reactions with aryl halides. *Chem. Sci.* **8**, 4437–4442 (2017). [doi:10.1039/C7SC00675F](https://doi.org/10.1039/C7SC00675F) [Medline](#)
16. P. A. Cox, M. Reid, A. G. Leach, A. D. Campbell, E. J. King, G. C. Lloyd-Jones, Base-Catalyzed Aryl-B(OH)<sub>2</sub> Protodeboronation Revisited: From Concerted Proton Transfer to Liberation of a Transient Aryl Anion. *J. Am. Chem. Soc.* **139**, 13156–13165 (2017). [doi:10.1021/jacs.7b07444](https://doi.org/10.1021/jacs.7b07444) [Medline](#)
17. D. C. Blakemore, L. Castro, I. Churcher, D. C. Rees, A. W. Thomas, D. M. Wilson, A. Wood, Organic synthesis provides opportunities to transform drug discovery. *Nat. Chem.* **10**, 383–394 (2018). [doi:10.1038/s41557-018-0021-z](https://doi.org/10.1038/s41557-018-0021-z) [Medline](#)
18. J. A. Joule, K. Mills, *Heterocyclic Chemistry* (Wiley-Blackwell, ed. 5, 2013).
19. M. R. Grimmett, Halogenation of Heterocycles: II. Six- and Seven-Membered Rings. *Adv. Heterocycl. Chem.* **58**, 271–345 (1993). [doi:10.1016/S0065-2725\(08\)60288-3](https://doi.org/10.1016/S0065-2725(08)60288-3)
20. M. A. Larsen, J. F. Hartwig, Iridium-catalyzed C-H borylation of heteroarenes: Scope, regioselectivity, application to late-stage functionalization, and mechanism. *J. Am. Chem. Soc.* **136**, 4287–4299 (2014). [doi:10.1021/ja412563e](https://doi.org/10.1021/ja412563e) [Medline](#)
21. H.-Q. Do, O. Daugulis, A general method for copper-catalyzed arene cross-dimerization. *J. Am. Chem. Soc.* **133**, 13577–13586 (2011). [doi:10.1021/ja2047717](https://doi.org/10.1021/ja2047717) [Medline](#)
22. J.-P. Finer, in *Ligand Coupling Reactions with Heteroaromatic Compounds, Vol. 18* (Pergamon, 1998), chap. 4.
23. K. D. Reichl, A. T. Radosevich, A phosphine-mediated stereocontrolled synthesis of Z-enediynes by a vicinal dialkynylation of ethynylphosphonium salts. *Chem. Commun.* **50**, 9302–9305 (2014). [doi:10.1039/C4CC03415E](https://doi.org/10.1039/C4CC03415E) [Medline](#)
24. R. Hoffmann, J. M. Howell, E. L. Muetterties, Molecular Orbital Theory of Pentacoordinate Phosphorus. *J. Am. Chem. Soc.* **94**, 3047–3058 (1972). [doi:10.1021/ja00764a028](https://doi.org/10.1021/ja00764a028)

25. F. G. Mann, J. Watson, Conditions of Salt Formation in Polyamines and Kindred Compounds. Salt Formation in the 2-Pyridylamines, Phosphines and Arsines. *J. Org. Chem.* **13**, 502–531 (1948). [doi:10.1021/jo01162a007](https://doi.org/10.1021/jo01162a007)
26. G. R. Newkome, D. C. Hager, A New Contractive Coupling Procedure. Convenient Phosphorus Expulsion Reaction. *J. Am. Chem. Soc.* **100**, 5567–5568 (1978). [doi:10.1021/ja00485a053](https://doi.org/10.1021/ja00485a053)
27. Y. Uchida, K. Onoue, N. Tada, F. Nagao, S. Oae, Ligand Coupling Reaction on the Phosphorus Atom. *Tetrahedron Lett.* **30**, 567–570 (1989). [doi:10.1016/S0040-4039\(00\)95256-0](https://doi.org/10.1016/S0040-4039(00)95256-0)
28. Y. Uchida, H. Kozawa, S. Oae, Formation of 2,2'-Bipyridyl by Ligand Coupling on the Phosphorus Atom. *Tetrahedron Lett.* **30**, 6365–6368 (1989). [doi:10.1016/S0040-4039\(01\)93895-X](https://doi.org/10.1016/S0040-4039(01)93895-X)
29. Y. Uchida, N. Echikawa, S. Oae, Reactions of Heteroaryllithium Compounds with Phosphorus Trichloride, Phosphorus Oxychloride, and Thionyl Chloride. Formation of Heterocyclic Biaryls. *Heteroatom Chem.* **5**, 409–413 (1994). [doi:10.1002/hc.520050414](https://doi.org/10.1002/hc.520050414)
30. F. Alonso, Y. Moglie, G. Radivoy, M. Yus, Solvent- and Catalyst-Free Regioselective Hydrophosphanation of Alkenes. *Green Chem.* **14**, 2699–2702 (2012). [doi:10.1039/c2gc35898k](https://doi.org/10.1039/c2gc35898k)
31. M. C. Hilton, R. D. Dolewski, A. McNally, Selective Functionalization of Pyridines via Heterocyclic Phosphonium Salts. *J. Am. Chem. Soc.* **138**, 13806–13809 (2016). [doi:10.1021/jacs.6b08662](https://doi.org/10.1021/jacs.6b08662) [Medline](#)
32. X. Zhang, A. McNally, Phosphonium Salts as Pseudohalides: Regioselective Nickel-Catalyzed Cross-Coupling of Complex Pyridines and Diazines. *Angew. Chem. Int. Ed.* **56**, 9833–9836 (2017). [doi:10.1002/anie.201704948](https://doi.org/10.1002/anie.201704948) [Medline](#)
33. J. L. Koniarczyk, D. Hesk, A. Overgard, I. W. Davies, A. McNally, A General Strategy for Site-Selective Incorporation of Deuterium and Tritium into Pyridines, Diazines, and Pharmaceuticals. *J. Am. Chem. Soc.* **140**, 1990–1993 (2018). [doi:10.1021/jacs.7b11710](https://doi.org/10.1021/jacs.7b11710) [Medline](#)
34. R. D. Dolewski, P. J. Fricke, A. McNally, Site-Selective Switching Strategies to Functionalize Polyazines. *J. Am. Chem. Soc.* **140**, 8020–8026 (2018). [doi:10.1021/jacs.8b04530](https://doi.org/10.1021/jacs.8b04530) [Medline](#)
35. R. G. Anderson, B. M. Jett, A. McNally, A Unified Approach to Couple Aromatic Heteronucleophiles to Azines and Pharmaceuticals. *Angew. Chem. Int. Ed.* **57**, 12514–12518 (2018). [doi:10.1002/anie.201807322](https://doi.org/10.1002/anie.201807322) [Medline](#)

36. E. Anders, F. Markus, Neue Methode Zur Regiospezifischen Substitution Einiger Reaktionsträger *N*-Heteroaromatischer Ringsystem. *Tetrahedron Lett.* **28**, 2675–2676 (1987). [doi:10.1016/S0040-4039\(00\)96178-1](https://doi.org/10.1016/S0040-4039(00)96178-1)
37. P. S. Fier, A Bifunctional Reagent Designed for the Mild, Nucleophilic Functionalization of Pyridines. *J. Am. Chem. Soc.* **139**, 9499–9502 (2017). [doi:10.1021/jacs.7b05414](https://doi.org/10.1021/jacs.7b05414) [Medline](#)
38. Both DLPNO-CCSD(T)/cc-pV(DT)Z and  $\omega$ B97XD/def2-QZVPP results are in close agreement. Full details in the supplementary materials.
39. O. Afzal, S. Kumar, M. R. Haider, M. R. Ali, R. Kumar, M. Jaggi, S. Bawa, A review on anticancer potential of bioactive heterocycle quinoline. *Eur. J. Med. Chem.* **97**, 871–910 (2015). [doi:10.1016/j.ejmech.2014.07.044](https://doi.org/10.1016/j.ejmech.2014.07.044) [Medline](#)
40. R. B. Silverman, M. W. Holladay, in *The Organic Chemistry of Drug Design and Drug Action* (Academic Press, ed. 3, 2014), chap. 2.
41. D. A. Erlanson, S. W. Fesik, R. E. Hubbard, W. Jahnke, H. Jhoti, Twenty years on: The impact of fragments on drug discovery. *Nat. Rev. Drug Discov.* **15**, 605–619 (2016). [doi:10.1038/nrd.2016.109](https://doi.org/10.1038/nrd.2016.109) [Medline](#)
42. C. W. Murray, D. C. Rees, The rise of fragment-based drug discovery. *Nat. Chem.* **1**, 187–192 (2009). [doi:10.1038/nchem.217](https://doi.org/10.1038/nchem.217) [Medline](#)
43. T. Cernak, K. D. Dykstra, S. Tyagarajan, P. Vachal, S. W. Krska, The medicinal chemist's toolbox for late stage functionalization of drug-like molecules. *Chem. Soc. Rev.* **45**, 546–576 (2016). [doi:10.1039/C5CS00628G](https://doi.org/10.1039/C5CS00628G) [Medline](#)
44. D. D. Perrin, W. L. F. Amerego, *Purification of Laboratory Chemicals* (Pergamon, ed. 3, 1988).
45. A. D. Becke, Density-Functional Thermochemistry. V. Systematic Optimization of Exchange-Correlation Functionals. *J. Chem. Phys.* **107**, 8554–8560 (1997). [doi:10.1063/1.475007](https://doi.org/10.1063/1.475007)
46. J.-D. Chai, M. Head-Gordon, Long-range corrected hybrid density functionals with damped atom-atom dispersion corrections. *Phys. Chem. Chem. Phys.* **10**, 6615–6620 (2008). [doi:10.1039/b810189b](https://doi.org/10.1039/b810189b) [Medline](#)
47. W. J. Hehre, R. Ditchfield, J. A. Pople, Self-Consistent Molecular Orbital Methods. XII. Further Extensions of Gaussian-Type Basis Sets for use in Molecular Orbital Studies of Organic Molecules. *J. Chem. Phys.* **56**, 2257–2261 (1972). [doi:10.1063/1.1677527](https://doi.org/10.1063/1.1677527)
48. P. C. Hariharan, J. A. Pople, The Influence of Polarization Functions on Molecular Orbital Hydrogenation Energies. *Theor. Chim. Acta* **28**, 213–222 (1973). [doi:10.1007/BF00533485](https://doi.org/10.1007/BF00533485)

49. M. M. Francl, W. J. Pietro, W. J. Hehre, J. S. Binkley, M. S. Gordon, D. J. DeFrees, J. A. Pople, Self-Consistent Molecular Orbital Methods. XXIII. A Polarization-Type Basis Set for Second-Row Elements. *J. Chem. Phys.* **77**, 3654–3665 (1982). [doi:10.1063/1.444267](https://doi.org/10.1063/1.444267)
50. V. A. Rassolov, M. A. Ratner, J. A. Pople, P. C. Redfern, L. A. Curtiss, 6-31G\* Basis Set for Third-Row Atoms. *J. Comput. Chem.* **22**, 976–984 (2001). [doi:10.1002/jcc.1058](https://doi.org/10.1002/jcc.1058)
51. T. Clark, J. Chandrasekhar, G. W. Spitznagel, P. V. R. Schleyer, P. von R. Schleyer, Efficient Diffuse Function-Augmented Basis Sets for Anion Calculations. III. The 3-21+G Basis Set for First-Row Elements, Li–F. *J. Comput. Chem.* **4**, 294–301 (1983). [doi:10.1002/jcc.540040303](https://doi.org/10.1002/jcc.540040303)
52. L. Goerigk, S. Grimme, A thorough benchmark of density functional methods for general main group thermochemistry, kinetics, and noncovalent interactions. *Phys. Chem. Chem. Phys.* **13**, 6670–6688 (2011). [doi:10.1039/c0cp02984j](https://doi.org/10.1039/c0cp02984j) [Medline](#)
53. A. Bhunia, T. Roy, R. G. Gonnade, A. T. Biju, Rapid access to benzoxaphospholes and their spiro analogues by a three-component coupling involving arynes, phosphines, and activated ketones. *Org. Lett.* **16**, 5132–5135 (2014). [doi:10.1021/ol502490t](https://doi.org/10.1021/ol502490t) [Medline](#)
54. K. Fukui, The Path of Chemical Reactions—The IRC Approach. *Acc. Chem. Res.* **14**, 363–368 (1981). [doi:10.1021/ar00072a001](https://doi.org/10.1021/ar00072a001)
55. S. Grimme, Supramolecular binding thermodynamics by dispersion-corrected density functional theory. *Chem. Eur. J.* **18**, 9955–9964 (2012). [doi:10.1002/chem.201200497](https://doi.org/10.1002/chem.201200497) [Medline](#)
56. GoodVibes, Version 2.0.1 (I. Funes-Ardoiz, R. S. Paton, 2018). [doi:10.5281/zenodo.595246](https://doi.org/10.5281/zenodo.595246)
57. E. Cancès, B. Mennucci, J. Tomasi, A New Integral Equation Formalism for the Polarizable Continuum Model: Theoretical Background and Applications to Isotropic and Anisotropic Dielectrics. *J. Chem. Phys.* **107**, 3032–3041 (1997). [doi:10.1063/1.474659](https://doi.org/10.1063/1.474659)
58. B. Mennucci, E. Cancès, J. Tomasi, Evaluation of Solvent Effects in Isotropic and Anisotropic Dielectrics and in Ionic Solutions with a Unified Integral Equation Method: Theoretical Bases, Computational Implementation, and Numerical Applications. *J. Phys. Chem. B* **101**, 10506–10517 (1997). [doi:10.1021/jp971959k](https://doi.org/10.1021/jp971959k)
59. B. Mennucci, J. Tomasi, Continuum Solvation models: A New Approach to the Problem of Solute's Charge Distribution and Cavity Boundaries. *J. Chem. Phys.* **106**, 5151–5158 (1997). [doi:10.1063/1.473558](https://doi.org/10.1063/1.473558)
60. J. Tomasi, B. Mennucci, E. Cancès, The IEF Version of the PCM Solvation Method: An Overview of a New Method Addressed to Study Molecular Solutes at the QM ab initio Level. *J. Mol. Struct. Theochem* **464**, 211–226 (1999). [doi:10.1016/S0166-1280\(98\)00553-3](https://doi.org/10.1016/S0166-1280(98)00553-3)

61. G. Scalmani, M. J. Frisch, Continuous surface charge polarizable continuum models of solvation. I. General formalism. *J. Chem. Phys.* **132**, 114110 (2010).  
[doi:10.1063/1.3359469](https://doi.org/10.1063/1.3359469) [Medline](#)
62. A. V. Marenich, C. J. Cramer, D. G. Truhlar, Universal solvation model based on solute electron density and on a continuum model of the solvent defined by the bulk dielectric constant and atomic surface tensions. *J. Phys. Chem. B* **113**, 6378–6396 (2009).  
[doi:10.1021/jp810292n](https://doi.org/10.1021/jp810292n) [Medline](#)
63. Gaussian 16, Revision A.03 (Gaussian Inc., Wallingford, CT, 2016).
64. K. B. Wiberg, Application of the Pople-Santry-Segal CNDO Method to the Cyclopropylcarbinyl and Cyclobutyl Cation and to Bicyclobutane. *Tetrahedron* **24**, 1083–1096 (1968). [doi:10.1016/0040-4020\(68\)88057-3](https://doi.org/10.1016/0040-4020(68)88057-3)
65. NBO, version 6.0 (Theoretical Chemistry Institute, University of Wisconsin, Madison, 2013).
66. PyMOL Molecular Graphics System, version 2.0.7 (Schrödinger LLC).
67. <https://gist.github.com/bobbypaton> (accessed 13 April 2018); [doi:10.5281/zenodo.1435046](https://doi.org/10.5281/zenodo.1435046).
68. GraphPad Prism, version 5.00 for Windows (GraphPad Software, San Diego, CA);  
[www.graphpad.com](http://www.graphpad.com).
69. A. Savin, R. Nesper, S. Wengert, T. E. Fassler, ELF: The Electron Localization Function. *Angew. Chem. Int. Ed. Engl.* **36**, 1808–1832 (1997). [doi:10.1002/anie.199718081](https://doi.org/10.1002/anie.199718081)
70. T. Lu, F. Chen, Multiwfn: A multifunctional wavefunction analyzer. *J. Comput. Chem.* **33**, 580–592 (2012). [doi:10.1002/jcc.22885](https://doi.org/10.1002/jcc.22885) [Medline](#)
71. F. Weigend, R. Ahlrichs, Balanced basis sets of split valence, triple zeta valence and quadruple zeta valence quality for H to Rn: Design and assessment of accuracy. *Phys. Chem. Chem. Phys.* **7**, 3297–3305 (2005). [doi:10.1039/b508541a](https://doi.org/10.1039/b508541a) [Medline](#)
72. F. Weigend, Accurate Coulomb-fitting basis sets for H to Rn. *Phys. Chem. Chem. Phys.* **8**, 1057–1065 (2006). [doi:10.1039/b515623h](https://doi.org/10.1039/b515623h) [Medline](#)
73. G. D. Purvis III, R. J. Bartlett, A Full Coupled-Cluster Singles and Doubles Model: The Inclusion of Disconnected Triples. *J. Chem. Phys.* **76**, 1910–1918 (1982).  
[doi:10.1063/1.443164](https://doi.org/10.1063/1.443164)
74. J. A. Pople, M. Head-Gordon, K. Raghavachari, Quadratic Configuration Interaction. A General Technique for Determining Electron Correlation Energies. *J. Chem. Phys.* **87**, 5968–5975 (1987). [doi:10.1063/1.453520](https://doi.org/10.1063/1.453520)
75. C. Riplinger, F. Neese, An efficient and near linear scaling pair natural orbital based local coupled cluster method. *J. Chem. Phys.* **138**, 034106 (2013). [doi:10.1063/1.4773581](https://doi.org/10.1063/1.4773581)  
[Medline](#)

76. C. Riplinger, B. Sandhoefer, A. Hansen, F. Neese, Natural triple excitations in local coupled cluster calculations with pair natural orbitals. *J. Chem. Phys.* **139**, 134101 (2013). [doi:10.1063/1.4821834](https://doi.org/10.1063/1.4821834) [Medline](#)
77. C. Riplinger, P. Pinski, U. Becker, E. F. Valeev, F. Neese, Sparse maps—A systematic infrastructure for reduced-scaling electronic structure methods. II. Linear scaling domain based pair natural orbital coupled cluster theory. *J. Chem. Phys.* **144**, 024109 (2016). [doi:10.1063/1.4939030](https://doi.org/10.1063/1.4939030) [Medline](#)
78. T. H. Dunning Jr., Gaussian Basis Sets for Use in Correlated Molecular Calculations. I. The Atoms Boron Through Neon and Hydrogen. *J. Chem. Phys.* **90**, 1007–1023 (1989). [doi:10.1063/1.456153](https://doi.org/10.1063/1.456153)
79. D. E. Woon, T. H. Dunning Jr., Gaussian Basis Sets for Use in Correlated Molecular Calculations. III. The Atoms Aluminum Through Argon. *J. Chem. Phys.* **98**, 1358–1371 (1993). [doi:10.1063/1.464303](https://doi.org/10.1063/1.464303)
80. E. R. Davidson, Comment on “Comment on Dunning’s Correlation-Consistent Basis Sets”. *Chem. Phys. Lett.* **260**, 514–518 (1996). [doi:10.1016/0009-2614\(96\)00917-7](https://doi.org/10.1016/0009-2614(96)00917-7)
81. F. Neese, The ORCA program system. *WIREs Comput. Mol. Sci.* **2**, 73–78 (2012). [doi:10.1002/wcms.81](https://doi.org/10.1002/wcms.81)
82. F. Neese, Software update: The ORCA program system, version 4.0. *WIREs Comput. Mol. Sci.* **8**, e1327 (2018). [doi:10.1002/wcms.1327](https://doi.org/10.1002/wcms.1327)
83. D. G. Liakos, M. Sparta, M. K. Kesharwani, J. M. L. Martin, F. Neese, Exploring the Accuracy Limits of Local Pair Natural Orbital Coupled-Cluster Theory. *J. Chem. Theory Comput.* **11**, 1525–1539 (2015). [doi:10.1021/ct501129s](https://doi.org/10.1021/ct501129s) [Medline](#)
84. J. Řezáč, P. Hobza, Describing Noncovalent Interactions beyond the Common Approximations: How Accurate Is the “Gold Standard,” CCSD(T) at the Complete Basis Set Limit? *J. Chem. Theory Comput.* **9**, 2151–2155 (2013). [doi:10.1021/ct400057w](https://doi.org/10.1021/ct400057w) [Medline](#)
85. D. G. Truhlar, Basis-Set Extrapolation. *Chem. Phys. Lett.* **294**, 45–48 (1998). [doi:10.1016/S0009-2614\(98\)00866-5](https://doi.org/10.1016/S0009-2614(98)00866-5)
86. E. L. Muetterties, W. Mahler, R. Schmutzler, Stereochemistry of Phosphorus(V) Fluorides. *Inorg. Chem.* **2**, 613–618 (1963). [doi:10.1021/ic50007a047](https://doi.org/10.1021/ic50007a047)
87. A. Klamt, Conductor-like screening model for real solvents: A new approach to the quantitative calculation of solvation phenomena. *J. Phys. Chem.* **99**, 2224–2235 (1995). [doi:10.1021/j100007a062](https://doi.org/10.1021/j100007a062)
88. A. Klamt, V. Jonas, T. Bürger, J. C. Lohrenz, Refinement and parametrization of COSMO-RS. *J. Phys. Chem. A* **102**, 5074–5085 (1998). [doi:10.1021/jp980017s](https://doi.org/10.1021/jp980017s)
89. COSMOtherm Version 18.0.0 (Revision 4360), COSMOlogic GmbH & Co KG.

90. F. Eckert, A. Klamt, Fast solvent screening via quantum chemistry: COSMO-RS approach. *AIChE J.* **48**, 369–385 (2002). [doi:10.1002/aic.690480220](https://doi.org/10.1002/aic.690480220)
91. TURBOMOLE, version 7.2.1 (TURBOMOLE GmbH).
92. E. J. Corey, Y. Tian, Selective 4-arylation of pyridines by a nonmetalloorganic process. *Org. Lett.* **7**, 5535–5537 (2005). [doi:10.1021/ol052476z](https://doi.org/10.1021/ol052476z) [Medline](#)
93. M. A. Abreo, N.-H. Lin, D. S. Garvey, D. E. Gunn, A. M. Hettinger, J. T. Wasicak, P. A. Pavlik, Y. C. Martin, D. L. Donnelly-Roberts, D. J. Anderson, J. P. Sullivan, M. Williams, S. P. Arneric, M. W. Holladay, Novel 3-Pyridyl ethers with subnanomolar affinity for central neuronal nicotinic acetylcholine receptors. *J. Med. Chem.* **39**, 817–825 (1996). [doi:10.1021/jm9506884](https://doi.org/10.1021/jm9506884) [Medline](#)
94. S. Molitor, J. Becker, V. H. Gessner, Selective dehydrocoupling of phosphines by lithium chloride carbenoids. *J. Am. Chem. Soc.* **136**, 15517–15520 (2014). [doi:10.1021/ja509381w](https://doi.org/10.1021/ja509381w) [Medline](#)
95. T. Hirai, L.-B. Han, Air-induced *anti*-Markovnikov addition of secondary phosphine oxides and H-phosphinates to alkenes. *Org. Lett.* **9**, 53–55 (2007). [doi:10.1021/ol062505l](https://doi.org/10.1021/ol062505l) [Medline](#)
96. D. E. Bergbreiter, Y.-C. Yang, C. E. Hobbs, Polyisobutylene-supported phosphines as recyclable and regenerable catalysts and reagents. *J. Org. Chem.* **76**, 6912–6917 (2011). [doi:10.1021/jo201097x](https://doi.org/10.1021/jo201097x) [Medline](#)
97. R. Sure, S. Grimme, Comprehensive benchmark of association (free) energies of realistic host–guest complexes. *J. Chem. Theory Comput.* **11**, 3785–3801 (2015). [doi:10.1021/acs.jctc.5b00296](https://doi.org/10.1021/acs.jctc.5b00296) [Medline](#)
